# Supplementary material
Source: PubMed Central journal article supplement (PMC1852132)
Supplement: pbio.0050076.st001.pdf [file pbio.0050076.st001.pdf]

| ac       | gene name | domain nr | detect_metho | parent    | length |
|----------|-----------|-----------|--------------|-----------|--------|
| TY1A_A   |           | 1         | pfam         | PF01021.9 | 157    |
| TY1A_A   |           | 2         | msa          | na        | 172    |
| TY1A_A   |           | 3         | msa          | na        | 111    |
| TY1A_BL  |           | 1         | pfam         | PF01021.9 | 180    |
| TY1A_BL  |           | 2         | unassigned   | na        | 148    |
| TY1A_BL  |           | 3         | msa          | na        | 112    |
| TY1A_BR  |           | 1         | pfam         | PF01021.9 | 161    |
| TY1A_BR  |           | 2         | unassigned   | na        | 120    |
| TY1A_BR  |           | 3         | msa          | na        | 159    |
| TY1A_DR1 |           | 1         | pfam         | PF01021.9 | 158    |
| TY1A_DR1 |           | 2         | unassigned   | na        | 175    |
| TY1A_DR1 |           | 3         | msa          | na        | 107    |
| TY1A_DR2 |           | 1         | pfam         | PF01021.9 | 176    |
| TY1A_DR2 |           | 2         | unassigned   | na        | 153    |
| TY1A_DR2 |           | 3         | msa          | na        | 111    |
| TY1A_DR3 |           | 1         | pfam         | PF01021.9 | 173    |
| TY1A_DR3 |           | 2         | unassigned   | na        | 155    |
| TY1A_DR3 |           | 3         | msa          | na        | 112    |
| TY1A_DR5 |           | 1         | pfam         | PF01021.9 | 171    |
| TY1A_DR5 |           | 2         | unassigned   | na        | 110    |
| TY1A_DR5 |           | 3         | msa          | na        | 159    |
| TY1A_DR6 |           | 1         | pfam         | PF01021.9 | 180    |
| TY1A_DR6 |           | 2         | unassigned   | na        | 101    |
| TY1A_DR6 |           | 3         | msa          | na        | 159    |
| TY1A_GR1 |           | 1         | pfam         | PF01021.9 | 122    |
| TY1A_GR1 |           | 2         | msa          | na        | 158    |
| TY1A_GR1 |           | 3         | msa          | na        | 160    |
| TY1A_GR2 |           | 1         | pfam         | PF01021.9 | 136    |
| TY1A_GR2 |           | 2         | unassigned   | na        | 197    |
| TY1A_GR2 |           | 3         | msa          | na        | 107    |
| TY1A_H   |           | 1         | pfam         | PF01021.9 | 193    |
| TY1A_H   |           | 2         | unassigned   | na        | 178    |
| TY1A_H   |           | 3         | msa          | na        | 107    |
| TY1A_JR1 |           | 1         | pfam         | PF01021.9 | 176    |
| TY1A_JR1 |           | 2         | unassigned   | na        | 126    |
| TY1A_JR1 |           | 3         | msa          | na        | 138    |
| TY1A_JR2 |           | 1         | pfam         | PF01021.9 | 176    |
| TY1A_JR2 |           | 2         | unassigned   | na        | 157    |
| TY1A_JR2 |           | 3         | msa          | na        | 107    |
| TY1A_ML2 |           | 1         | pfam         | PF01021.9 | 176    |
| TY1A_ML2 |           | 2         | unassigned   | na        | 105    |
| TY1A_ML2 |           | 3         | msa          | na        | 159    |
| TY1A_MR1 |           | 1         | pfam         | PF01021.9 | 166    |
| TY1A_MR1 |           | 2         | unassigned   | na        | 164    |
| TY1A_MR1 |           | 3         | msa          | na        | 110    |
| TY1A_NL1 |           | 1         | pfam         | PF01021.9 | 149    |
| TY1A_NL1 |           | 2         | unassigned   | na        | 184    |

|          |      |              |           |     |
|----------|------|--------------|-----------|-----|
| TY1A_NL1 |      | 3 msa        | na        | 107 |
| TY1A_NL2 |      | 1 pfam       | PF01021.9 | 176 |
| TY1A_NL2 |      | 2 unassigned | na        | 152 |
| TY1A_NL2 |      | 3 msa        | na        | 112 |
| TY1A_OL  |      | 1 pfam       | PF01021.9 | 177 |
| TY1A_OL  |      | 2 unassigned | na        | 103 |
| TY1A_OL  |      | 3 msa        | na        | 160 |
| TY1A_OR  |      | 1 pfam       | PF01021.9 | 156 |
| TY1A_OR  |      | 2 unassigned | na        | 178 |
| TY1A_OR  |      | 3 msa        | na        | 106 |
| TY2A_B   |      | 1 pfam       | PF01021.9 | 193 |
| TY2A_B   |      | 2 unassigned | na        | 84  |
| TY2A_B   |      | 3 msa        | na        | 161 |
| TY2A_C   |      | 1 pfam       | PF01021.9 | 172 |
| TY2A_C   |      | 2 unassigned | na        | 126 |
| TY2A_C   |      | 3 msa        | na        | 140 |
| TY2A_DR1 |      | 1 pfam       | PF01021.9 | 175 |
| TY2A_DR1 |      | 2 unassigned | na        | 100 |
| TY2A_DR1 |      | 3 msa        | na        | 163 |
| TY2A_DR2 |      | 1 pfam       | PF01021.9 | 169 |
| TY2A_DR2 |      | 2 unassigned | na        | 158 |
| TY2A_DR2 |      | 3 msa        | na        | 111 |
| TY2A_DR3 |      | 1 pfam       | PF01021.9 | 173 |
| TY2A_DR3 |      | 2 msa        | na        | 98  |
| TY2A_DR3 |      | 3 unassigned | na        | 56  |
| TY2A_DR3 |      | 4 msa        | na        | 111 |
| TY2A_F   |      | 1 pfam       | PF01021.9 | 193 |
| TY2A_F   |      | 2 unassigned | na        | 65  |
| TY2A_F   |      | 3 msa        | na        | 180 |
| TY2A_LR1 |      | 1 pfam       | PF01021.9 | 160 |
| TY2A_LR1 |      | 2 unassigned | na        | 168 |
| TY2A_LR1 |      | 3 msa        | na        | 110 |
| TY2A_OR1 |      | 1 pfam       | PF01021.9 | 156 |
| TY2A_OR1 |      | 2 unassigned | na        | 171 |
| TY2A_OR1 |      | 3 msa        | na        | 111 |
| TY2A_OR2 |      | 1 pfam       | PF01021.9 | 171 |
| TY2A_OR2 |      | 2 unassigned | na        | 127 |
| TY2A_OR2 |      | 3 msa        | na        | 140 |
| TY3A_G   |      | 1 unassigned | na        | 290 |
| TY3A_I   |      | 1 unassigned | na        | 290 |
| TY4A_H   |      | 1 unassigned | na        | 153 |
| TY4A_H   |      | 2 unassigned | na        | 260 |
| TY4A_J   |      | 1 unassigned | na        | 153 |
| TY4A_J   |      | 2 unassigned | na        | 261 |
| YAL001C  | TFC3 | 1 msa        | na        | 262 |
| YAL001C  | TFC3 | 2 unassigned | na        | 898 |
| YAL002W  | VPS8 | 1 unassigned | na        | 392 |
| YAL002W  | VPS8 | 2 pfam       | PF00637   | 196 |

|         |         |                  |         |     |
|---------|---------|------------------|---------|-----|
| YAL002W | VPS8    | 3 unassigned     | na      | 212 |
| YAL002W | VPS8    | 4 pfam           | PF00637 | 214 |
| YAL002W | VPS8    | 5 msa            | na      | 162 |
| YAL003W | EFB1    | 1 psiblast       | 1jlvA_  | 87  |
| YAL003W | EFB1    | 2 psiblast       | 1f60B_  | 119 |
| YAL004W | YAL004W | 1 msa            | na      | 215 |
| YAL005C | SSA1    | 1 psiblast       | 1hpm__  | 191 |
| YAL005C | SSA1    | 2 psiblast       | 1hpm__  | 116 |
| YAL005C | SSA1    | 3 psiblast       | 1hpm__  | 75  |
| YAL005C | SSA1    | 4 psiblast       | 1ckrA_  | 158 |
| YAL005C | SSA1    | 5 fold_recogniti | 1dkxA   | 102 |
| YAL007C | ERP2    | 1 pfam           | PF01105 | 215 |
| YAL008W | FUN14   | 1 unassigned     | na      | 198 |
| YAL009W | SPO7    | 1 pfam           | PF03907 | 259 |
| YAL010C | MDM10   | 1 msa            | na      | 326 |
| YAL010C | MDM10   | 2 unassigned     | na      | 167 |
| YAL011W | SWC3    | 1 unassigned     | na      | 52  |
| YAL011W | SWC3    | 2 psiblast       | 1i84S_  | 392 |
| YAL011W | SWC3    | 3 msa            | na      | 194 |
| YAL012W | CYS3    | 1 psiblast       | 1e5eA_  | 273 |
| YAL012W | CYS3    | 2 psiblast       | 1e5eA_  | 121 |
| YAL013W | DEP1    | 1 msa            | na      | 162 |
| YAL013W | DEP1    | 2 unassigned     | na      | 200 |
| YAL014C | SYN8    | 1 unassigned     | na      | 205 |
| YAL015C | NTG1    | 1 unassigned     | na      | 119 |
| YAL015C | NTG1    | 2 psiblast       | 2abk__  | 168 |
| YAL015C | NTG1    | 3 psiblast       | 2abk__  | 112 |
| YAL016W | TPD3    | 1 psiblast       | 1b3uA_  | 224 |
| YAL016W | TPD3    | 2 psiblast       | 1b3uA_  | 72  |
| YAL016W | TPD3    | 3 psiblast       | 1b3uA_  | 145 |
| YAL016W | TPD3    | 4 psiblast       | 1b3uA_  | 194 |
| YAL017W | PSK1    | 1 fold_recogniti | 1qhbA   | 590 |
| YAL017W | PSK1    | 2 unassigned     | na      | 322 |
| YAL017W | PSK1    | 3 psiblast       | 1dsyA_  | 142 |
| YAL017W | PSK1    | 4 psiblast       | 1fotA_  | 117 |
| YAL017W | PSK1    | 5 psiblast       | 1fotA_  | 185 |
| YAL018C | YAL018C | 1 unassigned     | na      | 185 |
| YAL018C | YAL018C | 2 msa            | na      | 140 |
| YAL019W | FUN30   | 1 msa            | na      | 215 |
| YAL019W | FUN30   | 2 psiblast       | 1gm5A_  | 97  |
| YAL019W | FUN30   | 3 psiblast       | 1gm5A_  | 123 |
| YAL019W | FUN30   | 4 psiblast       | 1gm5A_  | 336 |
| YAL019W | FUN30   | 5 unassigned     | na      | 81  |
| YAL019W | FUN30   | 6 psiblast       | 1hv8A_  | 213 |
| YAL019W | FUN30   | 7 psiblast       | 1d9xA_  | 66  |
| YAL020C | ATS1    | 1 psiblast       | 1a12A_  | 333 |
| YAL021C | CCR4    | 1 psiblast       | 1j15A_  | 397 |
| YAL021C | CCR4    | 2 psiblast       | 1k14A_  | 61  |

|           |           |    |                |         |     |
|-----------|-----------|----|----------------|---------|-----|
| YAL021C   | CCR4      | 3  | fold_recogniti | 1hd7A   | 379 |
| YAL022C   | FUN26     | 1  | msa            | na      | 171 |
| YAL022C   | FUN26     | 2  | pfam           | PF01733 | 346 |
| YAL023C   | PMT2      | 1  | pfam           | PF02366 | 334 |
| YAL023C   | PMT2      | 2  | pfam           | PF02815 | 65  |
| YAL023C   | PMT2      | 3  | pfam           | PF02815 | 67  |
| YAL023C   | PMT2      | 4  | pfam           | PF02815 | 77  |
| YAL023C   | PMT2      | 5  | msa            | na      | 215 |
| YAL024C   | LTE1      | 1  | pfam           | PF00618 | 121 |
| YAL024C   | LTE1      | 2  | unassigned     | na      | 842 |
| YAL024C   | LTE1      | 3  | msa            | na      | 127 |
| YAL024C   | LTE1      | 4  | unassigned     | na      | 71  |
| YAL024C   | LTE1      | 5  | psiblast       | 1bkdS_  | 274 |
| YAL025C   | MAK16     | 1  | msa            | na      | 247 |
| YAL025C   | MAK16     | 2  | unassigned     | na      | 59  |
| YAL026C   | DRS2      | 1  | unassigned     | na      | 136 |
| YAL026C   | DRS2      | 2  | psiblast       | 1eulA_  | 219 |
| YAL026C   | DRS2      | 3  | psiblast       | 1eulA_  | 414 |
| YAL026C   | DRS2      | 4  | psiblast       | 1eulA_  | 251 |
| YAL026C   | DRS2      | 5  | psiblast       | 1eulA_  | 245 |
| YAL026C   | DRS2      | 6  | msa            | na      | 90  |
| YAL027W   | YAL027W   | 1  | unassigned     | na      | 261 |
| YAL028W   | FRT2      | 1  | unassigned     | na      | 528 |
| YAL029C   | MYO4      | 1  | psiblast       | 1jwyA_  | 64  |
| YAL029C   | MYO4      | 2  | psiblast       | 1jwyA_  | 360 |
| YAL029C   | MYO4      | 3  | psiblast       | 1jwyA_  | 259 |
| YAL029C   | MYO4      | 4  | psiblast       | 1jwyA_  | 96  |
| YAL029C   | MYO4      | 5  | psiblast       | 1wdcA_  | 70  |
| YAL029C   | MYO4      | 6  | psiblast       | 2tmaA_  | 65  |
| YAL029C   | MYO4      | 7  | psiblast       | 2tmaA_  | 82  |
| YAL029C   | MYO4      | 8  | psiblast       | 2tmaA_  | 60  |
| YAL029C   | MYO4      | 9  | psiblast       | 2tmaA_  | 78  |
| YAL029C   | MYO4      | 10 | fold_recogniti | 1wq1G   | 164 |
| YAL029C   | MYO4      | 11 | fold_recogniti | 1wq1G   | 173 |
| YAL030W   | SNC1      | 1  | psiblast       | 1sfcA_  | 117 |
| YAL031C   | FUN21     | 1  | unassigned     | na      | 444 |
| YAL031C   | FUN21     | 2  | fold_recogniti | 1ldvA   | 54  |
| YAL031C   | FUN21     | 3  | fold_recogniti | 1ei3A   | 262 |
| YAL032C   | PRP45     | 1  | msa            | na      | 57  |
| YAL032C   | PRP45     | 2  | pfam           | PF02731 | 255 |
| YAL032C   | PRP45     | 3  | unassigned     | na      | 67  |
| YAL033W   | POP5      | 1  | pfam           | PF01900 | 173 |
| YAL034C   | FUN19     | 1  | msa            | na      | 227 |
| YAL034C   | FUN19     | 2  | unassigned     | na      | 78  |
| YAL034C   | FUN19     | 3  | msa            | na      | 158 |
| YAL034C-B | YAL034C-B | 1  | unassigned     | na      | 117 |
| YAL034W-A | MTW1      | 1  | fold_recogniti | 1jchA   | 218 |
| YAL034W-A | MTW1      | 2  | fold_recogniti | 1jchA   | 71  |

|           |           |   |                |         |     |
|-----------|-----------|---|----------------|---------|-----|
| YAL035W   | FUN12     | 1 | psiblast       | 1i84S_  | 304 |
| YAL035W   | FUN12     | 2 | unassigned     | na      | 81  |
| YAL035W   | FUN12     | 3 | psiblast       | 1g7sA_  | 238 |
| YAL035W   | FUN12     | 4 | psiblast       | 1g7sA_  | 118 |
| YAL035W   | FUN12     | 5 | psiblast       | 1g7sA_  | 113 |
| YAL035W   | FUN12     | 6 | psiblast       | 1g7sA_  | 148 |
| YAL036C   | RBG1      | 1 | psiblast       | 1egaA_  | 268 |
| YAL036C   | RBG1      | 2 | msa            | na      | 101 |
| YAL037C-A | YAL037C-A | 1 | unassigned     | na      | 30  |
| YAL037W   | YAL037W   | 1 | unassigned     | na      | 267 |
| YAL038W   | CDC19     | 1 | psiblast       | 1a3wA_  | 264 |
| YAL038W   | CDC19     | 2 | psiblast       | 1a3wA_  | 236 |
| YAL039C   | CYC3      | 1 | pfam           | PF01265 | 269 |
| YAL040C   | CLN3      | 1 | psiblast       | 1vin__  | 225 |
| YAL040C   | CLN3      | 2 | psiblast       | 1vin__  | 126 |
| YAL040C   | CLN3      | 3 | unassigned     | na      | 229 |
| YAL041W   | CDC24     | 1 | msa            | na      | 133 |
| YAL041W   | CDC24     | 2 | psiblast       | 1h67A_  | 120 |
| YAL041W   | CDC24     | 3 | psiblast       | 1foeA_  | 205 |
| YAL041W   | CDC24     | 4 | psiblast       | 1foeA_  | 184 |
| YAL041W   | CDC24     | 5 | msa            | na      | 112 |
| YAL041W   | CDC24     | 6 | unassigned     | na      | 100 |
| YAL042C-A | YAL042C-A | 1 | unassigned     | na      | 125 |
| YAL042W   | ERV46     | 1 | msa            | na      | 152 |
| YAL042W   | ERV46     | 2 | msa            | na      | 263 |
| YAL043C   | PTA1      | 1 | msa            | na      | 261 |
| YAL043C   | PTA1      | 2 | unassigned     | na      | 244 |
| YAL043C   | PTA1      | 3 | msa            | na      | 280 |
| YAL044C   | GCV3      | 1 | psiblast       | 1dxmA_  | 177 |
| YAL044W-A | YAL044W-A | 1 | pfam           | PF01722 | 110 |
| YAL045C   | YAL045C   | 1 | unassigned     | na      | 102 |
| YAL046C   | YAL046C   | 1 | pfam           | PF01722 | 118 |
| YAL047C   | SPC72     | 1 | psiblast       | 1i84S_  | 216 |
| YAL047C   | SPC72     | 2 | psiblast       | 2tmaA_  | 64  |
| YAL047C   | SPC72     | 3 | psiblast       | 2tmaA_  | 82  |
| YAL047C   | SPC72     | 4 | psiblast       | 2tmaA_  | 61  |
| YAL047C   | SPC72     | 5 | psiblast       | 2tmaA_  | 81  |
| YAL047C   | SPC72     | 6 | msa            | na      | 118 |
| YAL048C   | GON1      | 1 | psiblast       | 1i4dD_  | 197 |
| YAL048C   | GON1      | 2 | fold_recogniti | 1a2xA   | 92  |
| YAL048C   | GON1      | 3 | fold_recogniti | 1a2xA   | 141 |
| YAL048C   | GON1      | 4 | psiblast       | 1ceeA_  | 232 |
| YAL049C   | YAL049C   | 1 | psiblast       | 1din__  | 246 |
| YAL051W   | OAF1      | 1 | psiblast       | 1hwtD_  | 178 |
| YAL051W   | OAF1      | 2 | unassigned     | na      | 141 |
| YAL051W   | OAF1      | 3 | msa            | na      | 342 |
| YAL051W   | OAF1      | 4 | unassigned     | na      | 401 |
| YAL053W   | YAL053W   | 1 | msa            | na      | 160 |

|           |           |    |                |         |     |
|-----------|-----------|----|----------------|---------|-----|
| YAL053W   | YAL053W   | 2  | unassigned     | na      | 163 |
| YAL053W   | YAL053W   | 3  | msa            | na      | 309 |
| YAL053W   | YAL053W   | 4  | msa            | na      | 151 |
| YAL054C   | ACS1      | 1  | msa            | na      | 102 |
| YAL054C   | ACS1      | 2  | psiblast       | 1amuA_  | 203 |
| YAL054C   | ACS1      | 3  | psiblast       | 1amuA_  | 255 |
| YAL054C   | ACS1      | 4  | psiblast       | 1amuA_  | 153 |
| YAL055W   | PEX22     | 1  | unassigned     | na      | 180 |
| YAL056C-A | YAL056C-A | 1  | unassigned     | na      | 116 |
| YAL056W   | GPB2      | 1  | unassigned     | na      | 847 |
| YAL058W   | CNE1      | 1  | psiblast       | 1jhnA_  | 374 |
| YAL058W   | CNE1      | 2  | psiblast       | 1jhnA_  | 128 |
| YAL059W   | ECM1      | 1  | unassigned     | na      | 212 |
| YAL060W   | BDH1      | 1  | psiblast       | 1e3jA_  | 213 |
| YAL060W   | BDH1      | 2  | psiblast       | 1e3jA_  | 169 |
| YAL061W   | YAL061W   | 1  | psiblast       | 1e3jA_  | 247 |
| YAL061W   | YAL061W   | 2  | psiblast       | 1e3jA_  | 170 |
| YAL062W   | GDH3      | 1  | psiblast       | 1bgvA_  | 224 |
| YAL062W   | GDH3      | 2  | psiblast       | 1bgvA_  | 233 |
| YAL063C   | FLO9      | 1  | msa            | na      | 147 |
| YAL063C   | FLO9      | 2  | unassigned     | na      | 82  |
| YAL063C   | FLO9      | 3  | pfam           | PF00624 | 87  |
| YAL063C   | FLO9      | 4  | pfam           | PF00624 | 45  |
| YAL063C   | FLO9      | 5  | pfam           | PF00624 | 45  |
| YAL063C   | FLO9      | 6  | pfam           | PF00624 | 45  |
| YAL063C   | FLO9      | 7  | pfam           | PF00624 | 45  |
| YAL063C   | FLO9      | 8  | pfam           | PF00624 | 45  |
| YAL063C   | FLO9      | 9  | pfam           | PF00624 | 45  |
| YAL063C   | FLO9      | 10 | pfam           | PF00624 | 45  |
| YAL063C   | FLO9      | 11 | pfam           | PF00624 | 45  |
| YAL063C   | FLO9      | 12 | pfam           | PF00624 | 45  |
| YAL063C   | FLO9      | 13 | pfam           | PF00624 | 45  |
| YAL063C   | FLO9      | 14 | pfam           | PF00624 | 45  |
| YAL063C   | FLO9      | 15 | pfam           | PF00624 | 52  |
| YAL063C   | FLO9      | 16 | msa            | na      | 178 |
| YAL063C   | FLO9      | 17 | msa            | na      | 281 |
| YAL064C-A | YAL064C-A | 1  | unassigned     | na      | 126 |
| YAL064W   | YAL064W   | 1  | unassigned     | na      | 108 |
| YAL065C   | YAL065C   | 1  | unassigned     | na      | 128 |
| YAL066W   | YAL066W   | 1  | unassigned     | na      | 102 |
| YAL067C   | SEO1      | 1  | unassigned     | na      | 110 |
| YAL067C   | SEO1      | 2  | psiblast       | 1ja5A_  | 483 |
| YAL068C   | YAL068C   | 1  | pfam           | PF00660 | 120 |
| YAR002C-A | ERP1      | 1  | pfam           | PF01105 | 219 |
| YAR002W   | NUP60     | 1  | msa            | na      | 69  |
| YAR002W   | NUP60     | 2  | unassigned     | na      | 129 |
| YAR002W   | NUP60     | 3  | fold_recogniti | 1m2vB   | 341 |
| YAR003W   | SWD1      | 1  | psiblast       | 1erjA_  | 343 |

|         |         |    |            |         |     |
|---------|---------|----|------------|---------|-----|
| YAR003W | SWD1    | 2  | psiblast   | 1crzA_  | 83  |
| YAR007C | RFA1    | 1  | psiblast   | 1ewiA_  | 116 |
| YAR007C | RFA1    | 2  | unassigned | na      | 60  |
| YAR007C | RFA1    | 3  | psiblast   | 1fguA_  | 123 |
| YAR007C | RFA1    | 4  | psiblast   | 1fguA_  | 141 |
| YAR007C | RFA1    | 5  | psiblast   | 1l1oC_  | 181 |
| YAR008W | SEN34   | 1  | unassigned | na      | 149 |
| YAR008W | SEN34   | 2  | psiblast   | 1a79A_  | 126 |
| YAR014C | BUD14   | 1  | msa        | na      | 156 |
| YAR014C | BUD14   | 2  | unassigned | na      | 97  |
| YAR014C | BUD14   | 3  | psiblast   | 1g83A_  | 85  |
| YAR014C | BUD14   | 4  | unassigned | na      | 364 |
| YAR015W | ADE1    | 1  | psiblast   | 1a48__  | 68  |
| YAR015W | ADE1    | 2  | psiblast   | 1a48__  | 238 |
| YAR018C | KIN3    | 1  | psiblast   | 1ctpE_  | 300 |
| YAR018C | KIN3    | 2  | psiblast   | 1ctpE_  | 135 |
| YAR019C | CDC15   | 1  | psiblast   | 1f3mC_  | 101 |
| YAR019C | CDC15   | 2  | psiblast   | 1f3mC_  | 246 |
| YAR019C | CDC15   | 3  | unassigned | na      | 517 |
| YAR019C | CDC15   | 4  | msa        | na      | 110 |
| YAR020C | PAU7    | 1  | unassigned | na      | 55  |
| YAR023C | YAR023C | 1  | pfam       | PF00674 | 179 |
| YAR027W | UIP3    | 1  | pfam       | PF00674 | 235 |
| YAR028W | YAR028W | 1  | pfam       | PF00674 | 234 |
| YAR029W | YAR029W | 1  | unassigned | na      | 74  |
| YAR030C | YAR030C | 1  | unassigned | na      | 113 |
| YAR031W | PRM9    | 1  | msa        | na      | 125 |
| YAR031W | PRM9    | 2  | pfam       | PF00674 | 173 |
| YAR033W | MST28   | 1  | pfam       | PF00674 | 234 |
| YAR035W | YAT1    | 1  | pfam       | PF00755 | 687 |
| YAR042W | SWH1    | 1  | psiblast   | 1k1aA_  | 121 |
| YAR042W | SWH1    | 2  | psiblast   | 1k1aA_  | 135 |
| YAR044W |         | 1  | psiblast   | 1i84S_  | 332 |
| YAR044W |         | 2  | unassigned | na      | 85  |
| YAR044W |         | 3  | msa        | na      | 442 |
| YAR047C | YAR047C | 1  | unassigned | na      | 106 |
| YAR050W | FLO1    | 1  | msa        | na      | 259 |
| YAR050W | FLO1    | 2  | pfam       | PF00624 | 57  |
| YAR050W | FLO1    | 3  | pfam       | PF00624 | 45  |
| YAR050W | FLO1    | 4  | pfam       | PF00624 | 45  |
| YAR050W | FLO1    | 5  | pfam       | PF00624 | 45  |
| YAR050W | FLO1    | 6  | pfam       | PF00624 | 45  |
| YAR050W | FLO1    | 7  | pfam       | PF00624 | 45  |
| YAR050W | FLO1    | 8  | pfam       | PF00624 | 45  |
| YAR050W | FLO1    | 9  | pfam       | PF00624 | 45  |
| YAR050W | FLO1    | 10 | pfam       | PF00624 | 45  |
| YAR050W | FLO1    | 11 | pfam       | PF00624 | 45  |
| YAR050W | FLO1    | 12 | pfam       | PF00624 | 45  |

|         |         |    |                |         |     |
|---------|---------|----|----------------|---------|-----|
| YAR050W | FLO1    | 13 | pfam           | PF00624 | 45  |
| YAR050W | FLO1    | 14 | pfam           | PF00624 | 45  |
| YAR050W | FLO1    | 15 | pfam           | PF00624 | 45  |
| YAR050W | FLO1    | 16 | pfam           | PF00624 | 45  |
| YAR050W | FLO1    | 17 | pfam           | PF00624 | 45  |
| YAR050W | FLO1    | 18 | pfam           | PF00624 | 45  |
| YAR050W | FLO1    | 19 | pfam           | PF00624 | 58  |
| YAR050W | FLO1    | 20 | unassigned     | na      | 90  |
| YAR050W | FLO1    | 21 | msa            | na      | 353 |
| YAR053W | YAR053W | 1  | unassigned     | na      | 98  |
| YAR060C | YAR060C | 1  | unassigned     | na      | 111 |
| YAR061W | YAR061W | 1  | unassigned     | na      | 67  |
| YAR062W | YAR062W | 1  | msa            | na      | 117 |
| YAR062W | YAR062W | 2  | pfam           | PF00624 | 81  |
| YAR064W | YAR064W | 1  | unassigned     | na      | 99  |
| YAR066W | YAR066W | 1  | unassigned     | na      | 203 |
| YAR068W | YAR068W | 1  | unassigned     | na      | 161 |
| YAR069C | YAR069C | 1  | unassigned     | na      | 97  |
| YAR070C | YAR070C | 1  | unassigned     | na      | 99  |
| YAR071W | PHO11   | 1  | psiblast       | 1qfxA_  | 169 |
| YAR071W | PHO11   | 2  | psiblast       | 1qfxA_  | 298 |
| YAR073W | IMD1    | 1  | psiblast       | 1b3oA_  | 403 |
| YAR075W | YAR075W | 1  | psiblast       | 1b3oA_  | 157 |
| YBL001C | ECM15   | 1  | pfam           | PF01910 | 104 |
| YBL002W | HTB2    | 1  | psiblast       | 1id3D_  | 131 |
| YBL003C | HTA2    | 1  | psiblast       | 1id3C_  | 59  |
| YBL003C | HTA2    | 2  | psiblast       | 1id3C_  | 73  |
| YBL004W | UTP20   | 1  | msa            | na      | 351 |
| YBL004W | UTP20   | 2  | msa            | na      | 631 |
| YBL004W | UTP20   | 3  | unassigned     | na      | 701 |
| YBL004W | UTP20   | 4  | msa            | na      | 810 |
| YBL005W | PDR3    | 1  | psiblast       | 1ajyA_  | 103 |
| YBL005W | PDR3    | 2  | unassigned     | na      | 301 |
| YBL005W | PDR3    | 3  | msa            | na      | 134 |
| YBL005W | PDR3    | 4  | unassigned     | na      | 438 |
| YBL006C | LDB7    | 1  | unassigned     | na      | 145 |
| YBL007C | SLA1    | 1  | fold_recogniti | 1gbqA   | 73  |
| YBL007C | SLA1    | 2  | psiblast       | 1azeA_  | 94  |
| YBL007C | SLA1    | 3  | unassigned     | na      | 172 |
| YBL007C | SLA1    | 4  | psiblast       | 1g83A_  | 76  |
| YBL007C | SLA1    | 5  | psiblast       | 1g83A_  | 87  |
| YBL007C | SLA1    | 6  | unassigned     | na      | 289 |
| YBL007C | SLA1    | 7  | fold_recogniti | 1jv2B   | 272 |
| YBL007C | SLA1    | 8  | fold_recogniti | 1jv2B   | 58  |
| YBL007C | SLA1    | 9  | fold_recogniti | 1ldvA   | 123 |
| YBL008W | HIR1    | 1  | psiblast       | 1gg2B_  | 77  |
| YBL008W | HIR1    | 2  | psiblast       | 1erjA_  | 53  |
| YBL008W | HIR1    | 3  | psiblast       | 1k32A_  | 405 |



|         |         |                  |         |     |
|---------|---------|------------------|---------|-----|
| YBL008W | HIR1    | 4 unassigned     | na      | 72  |
| YBL008W | HIR1    | 5 msa            | na      | 233 |
| YBL009W | YBL009W | 1 unassigned     | na      | 368 |
| YBL009W | YBL009W | 2 psiblast       | 1aq1__  | 121 |
| YBL009W | YBL009W | 3 psiblast       | 1aq1__  | 72  |
| YBL009W | YBL009W | 4 psiblast       | 1aq1__  | 51  |
| YBL009W | YBL009W | 5 psiblast       | 1aq1__  | 64  |
| YBL010C | YBL010C | 1 unassigned     | na      | 280 |
| YBL011W | SCT1    | 1 unassigned     | na      | 80  |
| YBL011W | SCT1    | 2 psiblast       | 1k30A_  | 314 |
| YBL011W | SCT1    | 3 unassigned     | na      | 212 |
| YBL011W | SCT1    | 4 msa            | na      | 153 |
| YBL012C | YBL012C | 1 unassigned     | na      | 133 |
| YBL013W | FMT1    | 1 psiblast       | 1fmtA_  | 276 |
| YBL013W | FMT1    | 2 psiblast       | 1fmtA_  | 117 |
| YBL014C | RRN6    | 1 unassigned     | na      | 894 |
| YBL015W | ACH1    | 1 psiblast       | 1k6dA_  | 234 |
| YBL015W | ACH1    | 2 psiblast       | 1poiB_  | 292 |
| YBL016W | FUS3    | 1 psiblast       | 1erk__  | 105 |
| YBL016W | FUS3    | 2 psiblast       | 1erk__  | 248 |
| YBL017C | PEP1    | 1 msa            | na      | 217 |
| YBL017C | PEP1    | 2 unassigned     | na      | 74  |
| YBL017C | PEP1    | 3 msa            | na      | 303 |
| YBL017C | PEP1    | 4 unassigned     | na      | 91  |
| YBL017C | PEP1    | 5 msa            | na      | 736 |
| YBL017C | PEP1    | 6 unassigned     | na      | 158 |
| YBL018C | POP8    | 1 unassigned     | na      | 133 |
| YBL019W | APN2    | 1 psiblast       | 1hd7A_  | 376 |
| YBL019W | APN2    | 2 msa            | na      | 144 |
| YBL020W | RFT1    | 1 msa            | na      | 497 |
| YBL020W | RFT1    | 2 unassigned     | na      | 77  |
| YBL021C | HAP3    | 1 psiblast       | 1jfiB_  | 144 |
| YBL022C | PIM1    | 1 unassigned     | na      | 155 |
| YBL022C | PIM1    | 2 pfam           | PF02190 | 232 |
| YBL022C | PIM1    | 3 fold_recogniti | 1jqjC   | 62  |
| YBL022C | PIM1    | 4 fold_recogniti | 1jqjC   | 132 |
| YBL022C | PIM1    | 5 psiblast       | 1e32A_  | 187 |
| YBL022C | PIM1    | 6 psiblast       | 1e32A_  | 122 |
| YBL022C | PIM1    | 7 msa            | na      | 98  |
| YBL022C | PIM1    | 8 msa            | na      | 145 |
| YBL023C | MCM2    | 1 msa            | na      | 121 |
| YBL023C | MCM2    | 2 unassigned     | na      | 54  |
| YBL023C | MCM2    | 3 msa            | na      | 122 |
| YBL023C | MCM2    | 4 pfam           | PF00493 | 180 |
| YBL023C | MCM2    | 5 psiblast       | 1iqpA_  | 132 |
| YBL023C | MCM2    | 6 psiblast       | 1iqpA_  | 191 |
| YBL023C | MCM2    | 7 msa            | na      | 68  |
| YBL024W | NCL1    | 1 unassigned     | na      | 74  |

|           |           |   |                |         |     |
|-----------|-----------|---|----------------|---------|-----|
| YBL024W   | NCL1      | 2 | psiblast       | 1fbnA_  | 72  |
| YBL024W   | NCL1      | 3 | psiblast       | 1j4fA_  | 218 |
| YBL024W   | NCL1      | 4 | msa            | na      | 130 |
| YBL024W   | NCL1      | 5 | msa            | na      | 190 |
| YBL025W   | RRN10     | 1 | unassigned     | na      | 145 |
| YBL026W   | LSM2      | 1 | psiblast       | 1b34A_  | 95  |
| YBL027W   | RPL19B    | 1 | psiblast       | 1k5yP_  | 70  |
| YBL027W   | RPL19B    | 2 | psiblast       | 1k5yP_  | 119 |
| YBL028C   | YBL028C   | 1 | unassigned     | na      | 106 |
| YBL029C-A | YBL029C-A | 1 | unassigned     | na      | 94  |
| YBL029W   | YBL029W   | 1 | unassigned     | na      | 376 |
| YBL030C   | PET9      | 1 | pfam           | PF00153 | 122 |
| YBL030C   | PET9      | 2 | pfam           | PF00153 | 102 |
| YBL030C   | PET9      | 3 | pfam           | PF00153 | 94  |
| YBL031W   | SHE1      | 1 | unassigned     | na      | 338 |
| YBL032W   | HEK2      | 1 | psiblast       | 1e3pA_  | 116 |
| YBL032W   | HEK2      | 2 | psiblast       | 1e3pA_  | 265 |
| YBL033C   | RIB1      | 1 | psiblast       | 1g57A_  | 134 |
| YBL033C   | RIB1      | 2 | unassigned     | na      | 52  |
| YBL033C   | RIB1      | 3 | msa            | na      | 159 |
| YBL034C   | STU1      | 1 | unassigned     | na      | 216 |
| YBL034C   | STU1      | 2 | msa            | na      | 243 |
| YBL034C   | STU1      | 3 | unassigned     | na      | 60  |
| YBL034C   | STU1      | 4 | msa            | na      | 362 |
| YBL034C   | STU1      | 5 | unassigned     | na      | 632 |
| YBL035C   | POL12     | 1 | unassigned     | na      | 198 |
| YBL035C   | POL12     | 2 | msa            | na      | 507 |
| YBL036C   | YBL036C   | 1 | psiblast       | 1b54__  | 257 |
| YBL037W   | APL3      | 1 | psiblast       | 1gw5A_  | 135 |
| YBL037W   | APL3      | 2 | psiblast       | 1gw5A_  | 84  |
| YBL037W   | APL3      | 3 | psiblast       | 1gw5A_  | 162 |
| YBL037W   | APL3      | 4 | psiblast       | 1gw5A_  | 76  |
| YBL037W   | APL3      | 5 | psiblast       | 1gw5A_  | 119 |
| YBL037W   | APL3      | 6 | unassigned     | na      | 167 |
| YBL037W   | APL3      | 7 | psiblast       | 1qtsA_  | 145 |
| YBL037W   | APL3      | 8 | psiblast       | 1qtsA_  | 137 |
| YBL038W   | MRPL16    | 1 | psiblast       | 1lnrK_  | 232 |
| YBL039C   | URA7      | 1 | fold_recogniti | 1cp2A   | 208 |
| YBL039C   | URA7      | 2 | psiblast       | 1bxrB_  | 371 |
| YBL040C   | ERD2      | 1 | pfam           | PF00810 | 219 |
| YBL041W   | PRE7      | 1 | psiblast       | 1g0uL_  | 241 |
| YBL042C   | FUI1      | 1 | unassigned     | na      | 83  |
| YBL042C   | FUI1      | 2 | pfam           | PF02133 | 556 |
| YBL043W   | ECM13     | 1 | msa            | na      | 257 |
| YBL044W   | YBL044W   | 1 | unassigned     | na      | 122 |
| YBL045C   | COR1      | 1 | psiblast       | 1ezvA_  | 250 |
| YBL045C   | COR1      | 2 | psiblast       | 1ezvA_  | 207 |
| YBL046W   | YBL046W   | 1 | unassigned     | na      | 95  |

|           |           |    |                |         |     |
|-----------|-----------|----|----------------|---------|-----|
| YBL046W   | YBL046W   | 2  | fold_recogniti | 1l8mA   | 99  |
| YBL046W   | YBL046W   | 3  | fold_recogniti | 1l8mA   | 79  |
| YBL046W   | YBL046W   | 4  | fold_recogniti | 1l8mA   | 70  |
| YBL046W   | YBL046W   | 5  | fold_recogniti | 1l8mA   | 98  |
| YBL047C   | EDE1      | 1  | psiblast       | 1qjtA_  | 115 |
| YBL047C   | EDE1      | 2  | psiblast       | 1eh2__  | 129 |
| YBL047C   | EDE1      | 3  | psiblast       | 1i84S_  | 305 |
| YBL047C   | EDE1      | 4  | psiblast       | 2tmaA_  | 41  |
| YBL047C   | EDE1      | 5  | psiblast       | 2tmaA_  | 82  |
| YBL047C   | EDE1      | 6  | psiblast       | 2tmaA_  | 62  |
| YBL047C   | EDE1      | 7  | psiblast       | 2tmaA_  | 89  |
| YBL047C   | EDE1      | 8  | unassigned     | na      | 102 |
| YBL047C   | EDE1      | 9  | fold_recogniti | 1l8mA   | 74  |
| YBL047C   | EDE1      | 10 | fold_recogniti | 1l8mA   | 79  |
| YBL047C   | EDE1      | 11 | fold_recogniti | 1l8mA   | 70  |
| YBL047C   | EDE1      | 12 | fold_recogniti | 1l8mA   | 75  |
| YBL047C   | EDE1      | 13 | fold_recogniti | 1ldvA   | 112 |
| YBL047C   | EDE1      | 14 | pfam           | PF00627 | 46  |
| YBL048W   | YBL048W   | 1  | unassigned     | na      | 103 |
| YBL049W   | MOH1      | 1  | pfam           | PF03226 | 138 |
| YBL050W   | SEC17     | 1  | psiblast       | 1qqeA_  | 157 |
| YBL050W   | SEC17     | 2  | psiblast       | 1qqeA_  | 135 |
| YBL051C   | PIN4      | 1  | psiblast       | 1cvjA_  | 74  |
| YBL051C   | PIN4      | 2  | psiblast       | 1up1__  | 90  |
| YBL051C   | PIN4      | 3  | psiblast       | 1up1__  | 136 |
| YBL051C   | PIN4      | 4  | msa            | na      | 143 |
| YBL051C   | PIN4      | 5  | psiblast       | 1g9IA_  | 87  |
| YBL051C   | PIN4      | 6  | msa            | na      | 138 |
| YBL052C   | SAS3      | 1  | unassigned     | na      | 242 |
| YBL052C   | SAS3      | 2  | psiblast       | 1fy7A_  | 81  |
| YBL052C   | SAS3      | 3  | psiblast       | 1fy7A_  | 105 |
| YBL052C   | SAS3      | 4  | psiblast       | 1fy7A_  | 63  |
| YBL052C   | SAS3      | 5  | psiblast       | 1fy7A_  | 96  |
| YBL052C   | SAS3      | 6  | unassigned     | na      | 244 |
| YBL053W   | YBL053W   | 1  | unassigned     | na      | 124 |
| YBL054W   | YBL054W   | 1  | unassigned     | na      | 77  |
| YBL054W   | YBL054W   | 2  | psiblast       | 1mbe__  | 91  |
| YBL054W   | YBL054W   | 3  | unassigned     | na      | 357 |
| YBL055C   | YBL055C   | 1  | fold_recogniti | 1pscA   | 418 |
| YBL056W   | PTC3      | 1  | psiblast       | 1a6q__  | 303 |
| YBL056W   | PTC3      | 2  | psiblast       | 1a6q__  | 74  |
| YBL056W   | PTC3      | 3  | unassigned     | na      | 91  |
| YBL057C   | PTH2      | 1  | unassigned     | na      | 89  |
| YBL057C   | PTH2      | 2  | pfam           | PF01981 | 125 |
| YBL058W   | SHP1      | 1  | unassigned     | na      | 121 |
| YBL058W   | SHP1      | 2  | msa            | na      | 219 |
| YBL058W   | SHP1      | 3  | psiblast       | 1jruA_  | 83  |
| YBL059C-A | YBL059C-A | 1  | unassigned     | na      | 109 |

|           |         |   |                |         |     |
|-----------|---------|---|----------------|---------|-----|
| YBL059W   | YBL059W | 1 | unassigned     | na      | 193 |
| YBL060W   | YBL060W | 1 | unassigned     | na      | 64  |
| YBL060W   | YBL060W | 2 | psiblast       | 1bc9__  | 63  |
| YBL060W   | YBL060W | 3 | psiblast       | 1bc9__  | 162 |
| YBL060W   | YBL060W | 4 | unassigned     | na      | 221 |
| YBL060W   | YBL060W | 5 | msa            | na      | 177 |
| YBL061C   | SKT5    | 1 | unassigned     | na      | 106 |
| YBL061C   | SKT5    | 2 | psiblast       | 1fchA_  | 114 |
| YBL061C   | SKT5    | 3 | psiblast       | 1fchA_  | 69  |
| YBL061C   | SKT5    | 4 | psiblast       | 1fchA_  | 90  |
| YBL061C   | SKT5    | 5 | psiblast       | 1a17__  | 45  |
| YBL061C   | SKT5    | 6 | psiblast       | 1a17__  | 128 |
| YBL061C   | SKT5    | 7 | unassigned     | na      | 144 |
| YBL062W   | YBL062W | 1 | unassigned     | na      | 126 |
| YBL063W   | KIP1    | 1 | psiblast       | 1ii6A_  | 419 |
| YBL063W   | KIP1    | 2 | unassigned     | na      | 69  |
| YBL063W   | KIP1    | 3 | fold_recogniti | 1epwA   | 299 |
| YBL063W   | KIP1    | 4 | psiblast       | 1i84S_  | 324 |
| YBL064C   | PRX1    | 1 | psiblast       | 1prxA_  | 211 |
| YBL064C   | PRX1    | 2 | psiblast       | 1prxA_  | 50  |
| YBL065W   | YBL065W | 1 | unassigned     | na      | 114 |
| YBL066C   | SEF1    | 1 | psiblast       | 1pyiA_  | 161 |
| YBL066C   | SEF1    | 2 | unassigned     | na      | 76  |
| YBL066C   | SEF1    | 3 | msa            | na      | 511 |
| YBL066C   | SEF1    | 4 | unassigned     | na      | 309 |
| YBL067C   | UBP13   | 1 | msa            | na      | 132 |
| YBL067C   | UBP13   | 2 | pfam           | PF00442 | 56  |
| YBL067C   | UBP13   | 3 | msa            | na      | 343 |
| YBL067C   | UBP13   | 4 | unassigned     | na      | 66  |
| YBL067C   | UBP13   | 5 | pfam           | PF00443 | 91  |
| YBL068W   | PRS4    | 1 | psiblast       | 1dkrA_  | 211 |
| YBL068W   | PRS4    | 2 | psiblast       | 1dkrA_  | 144 |
| YBL069W   | AST1    | 1 | psiblast       | 1tehA_  | 265 |
| YBL069W   | AST1    | 2 | psiblast       | 1tehA_  | 164 |
| YBL070C   | YBL070C | 1 | unassigned     | na      | 106 |
| YBL071C   | YBL071C | 1 | unassigned     | na      | 102 |
| YBL071W-A | KTI11   | 1 | unassigned     | na      | 82  |
| YBL072C   | RPS8A   | 1 | pfam           | PF01201 | 128 |
| YBL072C   | RPS8A   | 2 | msa            | na      | 72  |
| YBL073W   | YBL073W | 1 | unassigned     | na      | 103 |
| YBL074C   | AAR2    | 1 | unassigned     | na      | 164 |
| YBL074C   | AAR2    | 2 | msa            | na      | 191 |
| YBL075C   | SSA3    | 1 | psiblast       | 1hjoA_  | 191 |
| YBL075C   | SSA3    | 2 | psiblast       | 1hjoA_  | 115 |
| YBL075C   | SSA3    | 3 | psiblast       | 1hjoA_  | 75  |
| YBL075C   | SSA3    | 4 | psiblast       | 1ckrA_  | 173 |
| YBL075C   | SSA3    | 5 | fold_recogniti | 1dkxA   | 95  |
| YBL076C   | ILS1    | 1 | psiblast       | 1ile__  | 380 |

|           |         |   |                |         |      |
|-----------|---------|---|----------------|---------|------|
| YBL076C   | ILS1    | 2 | psiblast       | 1ile__  | 115  |
| YBL076C   | ILS1    | 3 | psiblast       | 1ile__  | 156  |
| YBL076C   | ILS1    | 4 | psiblast       | 1ile__  | 45   |
| YBL076C   | ILS1    | 5 | psiblast       | 1ile__  | 195  |
| YBL076C   | ILS1    | 6 | msa            | na      | 181  |
| YBL077W   | YBL077W | 1 | unassigned     | na      | 143  |
| YBL078C   | ATG8    | 1 | psiblast       | 1eo6A_  | 117  |
| YBL079W   | NUP170  | 1 | unassigned     | na      | 75   |
| YBL079W   | NUP170  | 2 | pfam           | PF03177 | 1427 |
| YBL080C   | PET112  | 1 | pfam           | PF02934 | 271  |
| YBL080C   | PET112  | 2 | fold_recogniti | 1m9iA   | 92   |
| YBL080C   | PET112  | 3 | fold_recogniti | 1m9iA   | 178  |
| YBL081W   | YBL081W | 1 | unassigned     | na      | 110  |
| YBL081W   | YBL081W | 2 | fold_recogniti | 1m2vB   | 258  |
| YBL082C   | RHK1    | 1 | msa            | na      | 346  |
| YBL082C   | RHK1    | 2 | msa            | na      | 112  |
| YBL083C   | YBL083C | 1 | unassigned     | na      | 141  |
| YBL084C   | CDC27   | 1 | fold_recogniti | 1hh8A   | 102  |
| YBL084C   | CDC27   | 2 | fold_recogniti | 1hh8A   | 60   |
| YBL084C   | CDC27   | 3 | fold_recogniti | 1hh8A   | 50   |
| YBL084C   | CDC27   | 4 | fold_recogniti | 1ldvA   | 216  |
| YBL084C   | CDC27   | 5 | psiblast       | 1fchA_  | 160  |
| YBL084C   | CDC27   | 6 | psiblast       | 1fchA_  | 68   |
| YBL084C   | CDC27   | 7 | psiblast       | 1fchA_  | 102  |
| YBL085W   | BOI1    | 1 | psiblast       | 1g83A_  | 127  |
| YBL085W   | BOI1    | 2 | unassigned     | na      | 82   |
| YBL085W   | BOI1    | 3 | psiblast       | 1kw4A_  | 85   |
| YBL085W   | BOI1    | 4 | fold_recogniti | 1i3qA   | 317  |
| YBL085W   | BOI1    | 5 | unassigned     | na      | 133  |
| YBL085W   | BOI1    | 6 | psiblast       | 1fhwA_  | 164  |
| YBL085W   | BOI1    | 7 | unassigned     | na      | 72   |
| YBL086C   | YBL086C | 1 | unassigned     | na      | 466  |
| YBL087C   | RPL23A  | 1 | psiblast       | 1k5yR_  | 137  |
| YBL088C   | TEL1    | 1 | msa            | na      | 1325 |
| YBL088C   | TEL1    | 2 | unassigned     | na      | 394  |
| YBL088C   | TEL1    | 3 | pfam           | PF02259 | 383  |
| YBL088C   | TEL1    | 4 | psiblast       | 1e7uA_  | 652  |
| YBL088C   | TEL1    | 5 | pfam           | PF02260 | 33   |
| YBL089W   | AVT5    | 1 | pfam           | PF01490 | 509  |
| YBL090W   | MRP21   | 1 | unassigned     | na      | 177  |
| YBL091C   | MAP2    | 1 | psiblast       | 1b59A_  | 421  |
| YBL091C-A | SCS22   | 1 | unassigned     | na      | 99   |
| YBL092W   | RPL32   | 1 | psiblast       | 1k5yX_  | 58   |
| YBL092W   | RPL32   | 2 | psiblast       | 1k5yX_  | 72   |
| YBL093C   | ROX3    | 1 | msa            | na      | 83   |
| YBL093C   | ROX3    | 2 | unassigned     | na      | 137  |
| YBL094C   | YBL094C | 1 | unassigned     | na      | 110  |
| YBL095W   | YBL095W | 1 | unassigned     | na      | 60   |

|           |           |    |                |         |     |
|-----------|-----------|----|----------------|---------|-----|
| YBL095W   | YBL095W   | 2  | msa            | na      | 210 |
| YBL096C   | YBL096C   | 1  | unassigned     | na      | 102 |
| YBL097W   | BRN1      | 1  | msa            | na      | 118 |
| YBL097W   | BRN1      | 2  | unassigned     | na      | 610 |
| YBL098W   | BNA4      | 1  | psiblast       | 1bgn__  | 224 |
| YBL098W   | BNA4      | 2  | psiblast       | 1bgn__  | 236 |
| YBL099W   | ATP1      | 1  | psiblast       | 1cowA_  | 131 |
| YBL099W   | ATP1      | 2  | psiblast       | 1cowA_  | 285 |
| YBL099W   | ATP1      | 3  | psiblast       | 1cowA_  | 129 |
| YBL100C   | YBL100C   | 1  | unassigned     | na      | 104 |
| YBL101C   | ECM21     | 1  | unassigned     | na      | 507 |
| YBL101C   | ECM21     | 2  | msa            | na      | 196 |
| YBL101C   | ECM21     | 3  | unassigned     | na      | 414 |
| YBL102W   | SFT2      | 1  | msa            | na      | 215 |
| YBL103C   | RTG3      | 1  | msa            | na      | 276 |
| YBL103C   | RTG3      | 2  | psiblast       | 1am9A_  | 146 |
| YBL103C   | RTG3      | 3  | unassigned     | na      | 64  |
| YBL104C   | YBL104C   | 1  | fold_recogniti | 1scgB   | 352 |
| YBL104C   | YBL104C   | 2  | unassigned     | na      | 52  |
| YBL104C   | YBL104C   | 3  | msa            | na      | 521 |
| YBL105C   | PKC1      | 1  | pfam           | PF02185 | 95  |
| YBL105C   | PKC1      | 2  | fold_recogniti | 1cxzB   | 97  |
| YBL105C   | PKC1      | 3  | psiblast       | 1gmiA_  | 141 |
| YBL105C   | PKC1      | 4  | unassigned     | na      | 54  |
| YBL105C   | PKC1      | 5  | pfam           | PF00130 | 77  |
| YBL105C   | PKC1      | 6  | psiblast       | 1tbn__  | 82  |
| YBL105C   | PKC1      | 7  | unassigned     | na      | 81  |
| YBL105C   | PKC1      | 8  | psiblast       | 1dsyA_  | 170 |
| YBL105C   | PKC1      | 9  | psiblast       | 1fotA_  | 141 |
| YBL105C   | PKC1      | 10 | psiblast       | 1fotA_  | 213 |
| YBL106C   | SRO77     | 1  | psiblast       | 1gg2B_  | 301 |
| YBL106C   | SRO77     | 2  | psiblast       | 1c5kA_  | 170 |
| YBL106C   | SRO77     | 3  | msa            | na      | 245 |
| YBL106C   | SRO77     | 4  | unassigned     | na      | 294 |
| YBL107C   | YBL107C   | 1  | unassigned     | na      | 196 |
| YBL107W-A | YBL107W-A | 1  | unassigned     | na      | 34  |
| YBL108C-A | YBL108C-A | 1  | unassigned     | na      | 42  |
| YBL108W   | YBL108W   | 1  | unassigned     | na      | 101 |
| YBL109W   | YBL109W   | 1  | unassigned     | na      | 111 |
| YBL111C   | YBL111C   | 1  | msa            | na      | 237 |
| YBL111C   | YBL111C   | 2  | unassigned     | na      | 107 |
| YBL111C   | YBL111C   | 3  | pfam           | PF00270 | 271 |
| YBL111C   | YBL111C   | 4  | unassigned     | na      | 52  |
| YBL112C   | YBL112C   | 1  | unassigned     | na      | 105 |
| YBL113C   | YBL113C   | 1  | fold_recogniti | 1i3qA   | 372 |
| YBL113C   | YBL113C   | 2  | unassigned     | na      | 150 |
| YBL113C   | YBL113C   | 3  | msa            | na      | 172 |
| YBL113C   | YBL113C   | 4  | unassigned     | na      | 98  |

|         |         |   |                |         |     |
|---------|---------|---|----------------|---------|-----|
| YBR001C | NTH2    | 1 | unassigned     | na      | 120 |
| YBR001C | NTH2    | 2 | pfam           | PF01204 | 660 |
| YBR002C | RER2    | 1 | psiblast       | 1jp3A_  | 286 |
| YBR003W | COQ1    | 1 | unassigned     | na      | 101 |
| YBR003W | COQ1    | 2 | psiblast       | 1ubx__  | 220 |
| YBR003W | COQ1    | 3 | psiblast       | 1ubx__  | 152 |
| YBR004C | FMP44   | 1 | msa            | na      | 145 |
| YBR004C | FMP44   | 2 | msa            | na      | 288 |
| YBR005W | YBR005W | 1 | unassigned     | na      | 213 |
| YBR006W | UGA2    | 1 | psiblast       | 1bi9A_  | 299 |
| YBR006W | UGA2    | 2 | psiblast       | 1bi9A_  | 198 |
| YBR007C | YBR007C | 1 | unassigned     | na      | 151 |
| YBR007C | YBR007C | 2 | fold_recogniti | 1i3qA   | 377 |
| YBR007C | YBR007C | 3 | unassigned     | na      | 60  |
| YBR007C | YBR007C | 4 | fold_recogniti | 1klxA   | 54  |
| YBR007C | YBR007C | 5 | fold_recogniti | 1klxA   | 94  |
| YBR008C | FLR1    | 1 | unassigned     | na      | 77  |
| YBR008C | FLR1    | 2 | psiblast       | 1lviA_  | 471 |
| YBR009C | HHF1    | 1 | psiblast       | 1id3B_  | 103 |
| YBR010W | HHT1    | 1 | psiblast       | 1id3A_  | 136 |
| YBR011C | IPP1    | 1 | psiblast       | 1yppA_  | 287 |
| YBR012C | YBR012C | 1 | unassigned     | na      | 139 |
| YBR013C | YBR013C | 1 | unassigned     | na      | 129 |
| YBR014C | YBR014C | 1 | unassigned     | na      | 81  |
| YBR014C | YBR014C | 2 | psiblast       | 1b4qA_  | 122 |
| YBR015C | MNN2    | 1 | unassigned     | na      | 119 |
| YBR015C | MNN2    | 2 | fold_recogniti | 1lI0A   | 194 |
| YBR015C | MNN2    | 3 | unassigned     | na      | 284 |
| YBR016W | YBR016W | 1 | unassigned     | na      | 128 |
| YBR017C | KAP104  | 1 | unassigned     | na      | 96  |
| YBR017C | KAP104  | 2 | msa            | na      | 592 |
| YBR017C | KAP104  | 3 | msa            | na      | 170 |
| YBR017C | KAP104  | 4 | unassigned     | na      | 60  |
| YBR018C | GAL7    | 1 | psiblast       | 1hxqA_  | 366 |
| YBR019C | GAL10   | 1 | psiblast       | 1hzjA_  | 196 |
| YBR019C | GAL10   | 2 | psiblast       | 1hzjA_  | 61  |
| YBR019C | GAL10   | 3 | psiblast       | 1hzjA_  | 109 |
| YBR019C | GAL10   | 4 | psiblast       | 1i7jA_  | 333 |
| YBR020W | GAL1    | 1 | psiblast       | 1kkhA_  | 187 |
| YBR020W | GAL1    | 2 | psiblast       | 1kkhA_  | 185 |
| YBR020W | GAL1    | 3 | fold_recogniti | 1kvkA   | 156 |
| YBR021W | FUR4    | 1 | unassigned     | na      | 92  |
| YBR021W | FUR4    | 2 | pfam           | PF02133 | 486 |
| YBR021W | FUR4    | 3 | unassigned     | na      | 55  |
| YBR022W | YBR022W | 1 | unassigned     | na      | 177 |
| YBR023C | CHS3    | 1 | unassigned     | na      | 72  |
| YBR023C | CHS3    | 2 | msa            | na      | 471 |
| YBR023C | CHS3    | 3 | unassigned     | na      | 84  |

|         |         |   |                |         |     |
|---------|---------|---|----------------|---------|-----|
| YBR023C | CHS3    | 4 | pfam           | PF03142 | 538 |
| YBR024W | SCO2    | 1 | unassigned     | na      | 109 |
| YBR024W | SCO2    | 2 | psiblast       | 1qq2A_  | 192 |
| YBR025C | YBR025C | 1 | psiblast       | 1egaA_  | 204 |
| YBR025C | YBR025C | 2 | psiblast       | 1egaA_  | 109 |
| YBR025C | YBR025C | 3 | msa            | na      | 81  |
| YBR026C | ETR1    | 1 | psiblast       | 1qorA_  | 196 |
| YBR026C | ETR1    | 2 | psiblast       | 1qorA_  | 184 |
| YBR027C | YBR027C | 1 | unassigned     | na      | 110 |
| YBR028C | YBR028C | 1 | unassigned     | na      | 89  |
| YBR028C | YBR028C | 2 | psiblast       | 1ctpE_  | 296 |
| YBR028C | YBR028C | 3 | psiblast       | 1ctpE_  | 140 |
| YBR029C | CDS1    | 1 | unassigned     | na      | 179 |
| YBR029C | CDS1    | 2 | pfam           | PF01148 | 278 |
| YBR030W | YBR030W | 1 | msa            | na      | 295 |
| YBR030W | YBR030W | 2 | msa            | na      | 104 |
| YBR030W | YBR030W | 3 | unassigned     | na      | 153 |
| YBR031W | RPL4A   | 1 | psiblast       | 1k5yD_  | 244 |
| YBR031W | RPL4A   | 2 | psiblast       | 1k5yD_  | 56  |
| YBR031W | RPL4A   | 3 | msa            | na      | 62  |
| YBR032W | YBR032W | 1 | unassigned     | na      | 100 |
| YBR033W | EDS1    | 1 | psiblast       | 1hwtC_  | 134 |
| YBR033W | EDS1    | 2 | msa            | na      | 87  |
| YBR033W | EDS1    | 3 | msa            | na      | 172 |
| YBR033W | EDS1    | 4 | unassigned     | na      | 54  |
| YBR033W | EDS1    | 5 | fold_recogniti | 1b8fA   | 360 |
| YBR033W | EDS1    | 6 | unassigned     | na      | 112 |
| YBR034C | HMT1    | 1 | psiblast       | 1g6q1_  | 179 |
| YBR034C | HMT1    | 2 | psiblast       | 1g6q1_  | 169 |
| YBR035C | PDX3    | 1 | psiblast       | 1ci0A_  | 185 |
| YBR035C | PDX3    | 2 | psiblast       | 1ci0A_  | 43  |
| YBR036C | CSG2    | 1 | msa            | na      | 96  |
| YBR036C | CSG2    | 2 | unassigned     | na      | 314 |
| YBR037C | SCO1    | 1 | unassigned     | na      | 109 |
| YBR037C | SCO1    | 2 | psiblast       | 1qq2A_  | 186 |
| YBR038W | CHS2    | 1 | fold_recogniti | 1deqA   | 184 |
| YBR038W | CHS2    | 2 | unassigned     | na      | 102 |
| YBR038W | CHS2    | 3 | fold_recogniti | 1h7IA   | 267 |
| YBR038W | CHS2    | 4 | fold_recogniti | 1h7IA   | 74  |
| YBR038W | CHS2    | 5 | msa            | na      | 120 |
| YBR038W | CHS2    | 6 | msa            | na      | 216 |
| YBR039W | ATP3    | 1 | psiblast       | 1bmfG_  | 311 |
| YBR040W | FIG1    | 1 | unassigned     | na      | 298 |
| YBR041W | FAT1    | 1 | psiblast       | 1ba3__  | 360 |
| YBR041W | FAT1    | 2 | psiblast       | 1ba3__  | 263 |
| YBR042C | YBR042C | 1 | fold_recogniti | 1k30A   | 397 |
| YBR043C | QDR3    | 1 | unassigned     | na      | 70  |
| YBR043C | QDR3    | 2 | psiblast       | 1ja5A_  | 436 |



|           |           |   |                |         |     |
|-----------|-----------|---|----------------|---------|-----|
| YBR043C   | QDR3      | 3 | psiblast       | 1ja5A_  | 41  |
| YBR043C   | QDR3      | 4 | unassigned     | na      | 142 |
| YBR044C   | TCM62     | 1 | psiblast       | 1ioKA_  | 302 |
| YBR044C   | TCM62     | 2 | psiblast       | 1ioKA_  | 271 |
| YBR045C   | GIP1      | 1 | unassigned     | na      | 573 |
| YBR046C   | ZTA1      | 1 | psiblast       | 1qorA_  | 163 |
| YBR046C   | ZTA1      | 2 | psiblast       | 1qorA_  | 171 |
| YBR047W   | FMP23     | 1 | unassigned     | na      | 175 |
| YBR048W   | RPS11B    | 1 | psiblast       | 1k5xQ_  | 156 |
| YBR049C   | REB1      | 1 | fold_recogniti | 1ldvA   | 248 |
| YBR049C   | REB1      | 2 | unassigned     | na      | 125 |
| YBR049C   | REB1      | 3 | psiblast       | 1h88C_  | 99  |
| YBR049C   | REB1      | 4 | psiblast       | 1h88C_  | 50  |
| YBR049C   | REB1      | 5 | psiblast       | 1h88C_  | 58  |
| YBR049C   | REB1      | 6 | fold_recogniti | 1h88C   | 77  |
| YBR049C   | REB1      | 7 | fold_recogniti | 1h88C   | 63  |
| YBR049C   | REB1      | 8 | fold_recogniti | 1h88C   | 90  |
| YBR050C   | REG2      | 1 | unassigned     | na      | 338 |
| YBR051W   | YBR051W   | 1 | unassigned     | na      | 116 |
| YBR052C   | YBR052C   | 1 | psiblast       | 1qrdA_  | 210 |
| YBR053C   | YBR053C   | 1 | psiblast       | 1e1aA_  | 358 |
| YBR054W   | YRO2      | 1 | psiblast       | 1gu8A_  | 86  |
| YBR054W   | YRO2      | 2 | psiblast       | 1gu8A_  | 258 |
| YBR055C   | PRP6      | 1 | msa            | na      | 123 |
| YBR055C   | PRP6      | 2 | fold_recogniti | 1qqeA   | 151 |
| YBR055C   | PRP6      | 3 | fold_recogniti | 1qqeA   | 162 |
| YBR055C   | PRP6      | 4 | psiblast       | 1hz4A_  | 123 |
| YBR055C   | PRP6      | 5 | psiblast       | 1hz4A_  | 207 |
| YBR055C   | PRP6      | 6 | psiblast       | 1fchA_  | 133 |
| YBR056W   | YBR056W   | 1 | psiblast       | 1cz1A_  | 329 |
| YBR056W   | YBR056W   | 2 | psiblast       | 1cz1A_  | 92  |
| YBR056W   | YBR056W   | 3 | unassigned     | na      | 80  |
| YBR056W-A | YBR056W-A | 1 | unassigned     | na      | 66  |
| YBR057C   | MUM2      | 1 | psiblast       | 1c1gA_  | 84  |
| YBR057C   | MUM2      | 2 | psiblast       | 1i84S_  | 282 |
| YBR058C   | UBP14     | 1 | unassigned     | na      | 212 |
| YBR058C   | UBP14     | 2 | pfam           | PF02148 | 106 |
| YBR058C   | UBP14     | 3 | pfam           | PF00442 | 59  |
| YBR058C   | UBP14     | 4 | unassigned     | na      | 124 |
| YBR058C   | UBP14     | 5 | msa            | na      | 100 |
| YBR058C   | UBP14     | 6 | pfam           | PF00627 | 60  |
| YBR058C   | UBP14     | 7 | pfam           | PF00627 | 65  |
| YBR058C   | UBP14     | 8 | pfam           | PF00443 | 77  |
| YBR058C-A | TSC3      | 1 | unassigned     | na      | 80  |
| YBR059C   | AKL1      | 1 | psiblast       | 1ql6A_  | 118 |
| YBR059C   | AKL1      | 2 | psiblast       | 1ql6A_  | 68  |
| YBR059C   | AKL1      | 3 | psiblast       | 1ql6A_  | 179 |
| YBR059C   | AKL1      | 4 | psiblast       | 1cdmA_  | 105 |

|         |         |   |                |         |     |
|---------|---------|---|----------------|---------|-----|
| YBR059C | AKL1    | 5 | psiblast       | 1cdmA_  | 119 |
| YBR059C | AKL1    | 6 | unassigned     | na      | 519 |
| YBR060C | ORC2    | 1 | fold_recogniti | 1m2vB   | 260 |
| YBR060C | ORC2    | 2 | msa            | na      | 360 |
| YBR061C | TRM7    | 1 | psiblast       | 1eizA_  | 213 |
| YBR061C | TRM7    | 2 | msa            | na      | 97  |
| YBR062C | YBR062C | 1 | psiblast       | 1chc__  | 115 |
| YBR063C | YBR063C | 1 | unassigned     | na      | 404 |
| YBR064W | YBR064W | 1 | unassigned     | na      | 142 |
| YBR065C | ECM2    | 1 | unassigned     | na      | 91  |
| YBR065C | ECM2    | 2 | psiblast       | 1cvjA_  | 107 |
| YBR065C | ECM2    | 3 | psiblast       | 1cvjA_  | 89  |
| YBR065C | ECM2    | 4 | psiblast       | 1l3kA_  | 77  |
| YBR066C | NRG2    | 1 | psiblast       | 1tf6A_  | 220 |
| YBR067C | TIP1    | 1 | fold_recogniti | 1ldvA   | 210 |
| YBR068C | BAP2    | 1 | unassigned     | na      | 80  |
| YBR068C | BAP2    | 2 | pfam           | PF00324 | 529 |
| YBR069C | TAT1    | 1 | unassigned     | na      | 55  |
| YBR069C | TAT1    | 2 | pfam           | PF00324 | 564 |
| YBR070C | YBR070C | 1 | fold_recogniti | 1f0kA   | 237 |
| YBR071W | YBR071W | 1 | unassigned     | na      | 211 |
| YBR072W | HSP26   | 1 | psiblast       | 1gmeA_  | 214 |
| YBR073W | RDH54   | 1 | msa            | na      | 269 |
| YBR073W | RDH54   | 2 | unassigned     | na      | 69  |
| YBR073W | RDH54   | 3 | fold_recogniti | 1gm5A   | 186 |
| YBR073W | RDH54   | 4 | psiblast       | 1hv8A_  | 132 |
| YBR073W | RDH54   | 5 | psiblast       | 1c4oA_  | 302 |
| YBR074W | YBR074W | 1 | unassigned     | na      | 52  |
| YBR074W | YBR074W | 2 | psiblast       | 1cp7A_  | 286 |
| YBR074W | YBR074W | 3 | unassigned     | na      | 75  |
| YBR075W | 425     | 1 | msa            | na      | 295 |
| YBR075W | 425     | 2 | unassigned     | na      | 165 |
| YBR076W | ECM8    | 1 | unassigned     | na      | 339 |
| YBR077C | YBR077C | 1 | unassigned     | na      | 162 |
| YBR078W | ECM33   | 1 | psiblast       | 1dnqA_  | 91  |
| YBR078W | ECM33   | 2 | psiblast       | 1jl5A_  | 377 |
| YBR079C | RPG1    | 1 | fold_recogniti | 1hz4A   | 158 |
| YBR079C | RPG1    | 2 | fold_recogniti | 1hz4A   | 127 |
| YBR079C | RPG1    | 3 | fold_recogniti | 1hz4A   | 166 |
| YBR079C | RPG1    | 4 | unassigned     | na      | 70  |
| YBR079C | RPG1    | 5 | psiblast       | 1c1gA_  | 89  |
| YBR079C | RPG1    | 6 | psiblast       | 1i84S_  | 354 |
| YBR080C | SEC18   | 1 | psiblast       | 1cr5A_  | 103 |
| YBR080C | SEC18   | 2 | psiblast       | 1cr5A_  | 115 |
| YBR080C | SEC18   | 3 | psiblast       | 1hqcA_  | 192 |
| YBR080C | SEC18   | 4 | fold_recogniti | 1e32A   | 96  |
| YBR080C | SEC18   | 5 | psiblast       | 1nsf__  | 184 |
| YBR080C | SEC18   | 6 | psiblast       | 1nsf__  | 68  |

|           |           |   |                |         |     |
|-----------|-----------|---|----------------|---------|-----|
| YBR081C   | SPT7      | 1 | psiblast       | 1i84S_  | 329 |
| YBR081C   | SPT7      | 2 | unassigned     | na      | 60  |
| YBR081C   | SPT7      | 3 | psiblast       | 1e6iA_  | 169 |
| YBR081C   | SPT7      | 4 | fold_recogniti | 1l8mA   | 74  |
| YBR081C   | SPT7      | 5 | fold_recogniti | 1l8mA   | 79  |
| YBR081C   | SPT7      | 6 | fold_recogniti | 1l8mA   | 70  |
| YBR081C   | SPT7      | 7 | fold_recogniti | 1l8mA   | 120 |
| YBR081C   | SPT7      | 8 | unassigned     | na      | 431 |
| YBR082C   | UBC4      | 1 | psiblast       | 1qcqA_  | 148 |
| YBR083W   | TEC1      | 1 | pfam           | PF01285 | 486 |
| YBR084W   | MIS1      | 1 | psiblast       | 1diaA_  | 199 |
| YBR084W   | MIS1      | 2 | psiblast       | 1diaA_  | 137 |
| YBR084W   | MIS1      | 3 | psiblast       | 1fp7A_  | 380 |
| YBR084W   | MIS1      | 4 | psiblast       | 1fp7A_  | 259 |
| YBR085C-A | YBR085C-A | 1 | unassigned     | na      | 85  |
| YBR085W   | AAC3      | 1 | pfam           | PF00153 | 112 |
| YBR085W   | AAC3      | 2 | pfam           | PF00153 | 101 |
| YBR085W   | AAC3      | 3 | pfam           | PF00153 | 94  |
| YBR086C   | IST2      | 1 | msa            | na      | 548 |
| YBR086C   | IST2      | 2 | fold_recogniti | 1i3qA   | 398 |
| YBR087W   | RFC5      | 1 | psiblast       | 1iqpA_  | 75  |
| YBR087W   | RFC5      | 2 | psiblast       | 1iqpA_  | 279 |
| YBR088C   | POL30     | 1 | psiblast       | 1plq__  | 127 |
| YBR088C   | POL30     | 2 | psiblast       | 1plq__  | 131 |
| YBR089C-A | NHP6B     | 1 | psiblast       | 1cg7A_  | 99  |
| YBR089W   | YBR089W   | 1 | unassigned     | na      | 199 |
| YBR090C   | YBR090C   | 1 | unassigned     | na      | 122 |
| YBR091C   | MRS5      | 1 | pfam           | PF02953 | 109 |
| YBR092C   | PHO3      | 1 | psiblast       | 1qfxA_  | 168 |
| YBR092C   | PHO3      | 2 | psiblast       | 1qfxA_  | 299 |
| YBR093C   | PHO5      | 1 | psiblast       | 1qfxA_  | 168 |
| YBR093C   | PHO5      | 2 | psiblast       | 1qfxA_  | 299 |
| YBR094W   | YBR094W   | 1 | psiblast       | 1j9jA_  | 241 |
| YBR094W   | YBR094W   | 2 | unassigned     | na      | 133 |
| YBR094W   | YBR094W   | 3 | pfam           | PF03133 | 379 |
| YBR095C   | RXT2      | 1 | unassigned     | na      | 453 |
| YBR096W   | YBR096W   | 1 | msa            | na      | 230 |
| YBR097W   | VPS15     | 1 | psiblast       | 1cdkA_  | 156 |
| YBR097W   | VPS15     | 2 | psiblast       | 1cdkA_  | 234 |
| YBR097W   | VPS15     | 3 | psiblast       | 1b3uA_  | 90  |
| YBR097W   | VPS15     | 4 | psiblast       | 1b3uA_  | 332 |
| YBR097W   | VPS15     | 5 | unassigned     | na      | 241 |
| YBR097W   | VPS15     | 6 | psiblast       | 1gg2B_  | 120 |
| YBR097W   | VPS15     | 7 | fold_recogniti | 1k32A   | 281 |
| YBR098W   | MMS4      | 1 | unassigned     | na      | 471 |
| YBR099C   | YBR099C   | 1 | unassigned     | na      | 127 |
| YBR100W   | 453       | 1 | unassigned     | na      | 112 |
| YBR101C   | FES1      | 1 | psiblast       | 1ejll_  | 118 |

|           |           |   |                |         |     |
|-----------|-----------|---|----------------|---------|-----|
| YBR101C   | FES1      | 2 | psiblast       | 1ejll_  | 56  |
| YBR101C   | FES1      | 3 | psiblast       | 1ejll_  | 116 |
| YBR102C   | EXO84     | 1 | unassigned     | na      | 157 |
| YBR102C   | EXO84     | 2 | msa            | na      | 122 |
| YBR102C   | EXO84     | 3 | unassigned     | na      | 62  |
| YBR102C   | EXO84     | 4 | psiblast       | 1awe__  | 139 |
| YBR102C   | EXO84     | 5 | msa            | na      | 273 |
| YBR103C-A | YBR103C-A | 1 | unassigned     | na      | 47  |
| YBR103W   | SIF2      | 1 | msa            | na      | 187 |
| YBR103W   | SIF2      | 2 | psiblast       | 1gg2B_  | 348 |
| YBR104W   | YMC2      | 1 | pfam           | PF00153 | 129 |
| YBR104W   | YMC2      | 2 | pfam           | PF00153 | 107 |
| YBR104W   | YMC2      | 3 | pfam           | PF00153 | 93  |
| YBR105C   | VID24     | 1 | unassigned     | na      | 105 |
| YBR105C   | VID24     | 2 | msa            | na      | 257 |
| YBR106W   | PHO88     | 1 | unassigned     | na      | 188 |
| YBR107C   | IML3      | 1 | unassigned     | na      | 245 |
| YBR108W   | YBR108W   | 1 | msa            | na      | 697 |
| YBR108W   | YBR108W   | 2 | unassigned     | na      | 151 |
| YBR109C   | CMD1      | 1 | psiblast       | 1iq5A_  | 77  |
| YBR109C   | CMD1      | 2 | psiblast       | 1iq5A_  | 70  |
| YBR109W-A | YBR109W-A | 1 | unassigned     | na      | 74  |
| YBR110W   | ALG1      | 1 | psiblast       | 1f0kA_  | 224 |
| YBR110W   | ALG1      | 2 | psiblast       | 1f0kA_  | 166 |
| YBR110W   | ALG1      | 3 | unassigned     | na      | 59  |
| YBR111C   | YSA1      | 1 | unassigned     | na      | 72  |
| YBR111C   | YSA1      | 2 | psiblast       | 1f3yA_  | 159 |
| YBR112C   | CYC8      | 1 | psiblast       | 1fchA_  | 94  |
| YBR112C   | CYC8      | 2 | psiblast       | 1fchA_  | 70  |
| YBR112C   | CYC8      | 3 | psiblast       | 1fchA_  | 110 |
| YBR112C   | CYC8      | 4 | psiblast       | 1ft2A_  | 169 |
| YBR112C   | CYC8      | 5 | psiblast       | 1ft2A_  | 66  |
| YBR112C   | CYC8      | 6 | fold_recogniti | 1m2vB   | 79  |
| YBR112C   | CYC8      | 7 | fold_recogniti | 1jv2B   | 246 |
| YBR112C   | CYC8      | 8 | fold_recogniti | 1jv2B   | 58  |
| YBR112C   | CYC8      | 9 | unassigned     | na      | 74  |
| YBR113W   | YBR113W   | 1 | unassigned     | na      | 160 |
| YBR114W   | RAD16     | 1 | unassigned     | na      | 82  |
| YBR114W   | RAD16     | 2 | psiblast       | 1gm5A_  | 51  |
| YBR114W   | RAD16     | 3 | psiblast       | 1gm5A_  | 235 |
| YBR114W   | RAD16     | 4 | unassigned     | na      | 160 |
| YBR114W   | RAD16     | 5 | psiblast       | 1hv8A_  | 262 |
| YBR115C   | LYS2      | 1 | msa            | na      | 131 |
| YBR115C   | LYS2      | 2 | unassigned     | na      | 82  |
| YBR115C   | LYS2      | 3 | psiblast       | 1amuA_  | 229 |
| YBR115C   | LYS2      | 4 | psiblast       | 1amuA_  | 253 |
| YBR115C   | LYS2      | 5 | psiblast       | 1amuA_  | 148 |
| YBR115C   | LYS2      | 6 | psiblast       | 1dnyA_  | 93  |

|           |           |   |                |         |     |
|-----------|-----------|---|----------------|---------|-----|
| YBR115C   | LYS2      | 7 | psiblast       | 1I5aA_  | 252 |
| YBR115C   | LYS2      | 8 | msa            | na      | 204 |
| YBR116C   | YBR116C   | 1 | unassigned     | na      | 175 |
| YBR117C   | TKL2      | 1 | psiblast       | 1gpuA_  | 291 |
| YBR117C   | TKL2      | 2 | psiblast       | 1gpuA_  | 49  |
| YBR117C   | TKL2      | 3 | psiblast       | 1gpuA_  | 243 |
| YBR117C   | TKL2      | 4 | psiblast       | 1gpuA_  | 98  |
| YBR118W   | TEF2      | 1 | psiblast       | 1f60A_  | 195 |
| YBR118W   | TEF2      | 2 | psiblast       | 1f60A_  | 137 |
| YBR118W   | TEF2      | 3 | psiblast       | 1f60A_  | 126 |
| YBR119W   | MUD1      | 1 | psiblast       | 1cvjA_  | 113 |
| YBR119W   | MUD1      | 2 | psiblast       | 1cvjA_  | 99  |
| YBR119W   | MUD1      | 3 | psiblast       | 2u1a__  | 86  |
| YBR120C   | CBP6      | 1 | unassigned     | na      | 162 |
| YBR121C   | GRS1      | 1 | psiblast       | 1atiA_  | 460 |
| YBR121C   | GRS1      | 2 | psiblast       | 1atiA_  | 131 |
| YBR121C   | GRS1      | 3 | psiblast       | 1qf6A_  | 76  |
| YBR122C   | MRPL36    | 1 | fold_recogniti | 1InrY   | 196 |
| YBR123C   | TFC1      | 1 | msa            | na      | 540 |
| YBR123C   | TFC1      | 2 | unassigned     | na      | 109 |
| YBR124W   | YBR124W   | 1 | unassigned     | na      | 119 |
| YBR125C   | PTC4      | 1 | psiblast       | 1a6q__  | 393 |
| YBR126C   | TPS1      | 1 | msa            | na      | 115 |
| YBR126C   | TPS1      | 2 | fold_recogniti | 1f6dA   | 181 |
| YBR126C   | TPS1      | 3 | fold_recogniti | 1f6dA   | 199 |
| YBR126W-A | YBR126W-A | 1 | unassigned     | na      | 47  |
| YBR127C   | VMA2      | 1 | psiblast       | 1fx0A_  | 99  |
| YBR127C   | VMA2      | 2 | psiblast       | 1fx0A_  | 287 |
| YBR127C   | VMA2      | 3 | psiblast       | 1fx0A_  | 131 |
| YBR128C   | ATG14     | 1 | unassigned     | na      | 174 |
| YBR128C   | ATG14     | 2 | msa            | na      | 170 |
| YBR129C   | OPY1      | 1 | unassigned     | na      | 170 |
| YBR129C   | OPY1      | 2 | pfam           | PF00169 | 158 |
| YBR130C   | SHE3      | 1 | psiblast       | 1i84S_  | 355 |
| YBR130C   | SHE3      | 2 | unassigned     | na      | 70  |
| YBR131W   | CCZ1      | 1 | unassigned     | na      | 704 |
| YBR132C   | AGP2      | 1 | unassigned     | na      | 69  |
| YBR132C   | AGP2      | 2 | pfam           | PF00324 | 527 |
| YBR133C   | HSL7      | 1 | unassigned     | na      | 291 |
| YBR133C   | HSL7      | 2 | psiblast       | 1f3IA_  | 205 |
| YBR133C   | HSL7      | 3 | psiblast       | 1f3IA_  | 134 |
| YBR133C   | HSL7      | 4 | unassigned     | na      | 197 |
| YBR134W   | YBR134W   | 1 | unassigned     | na      | 133 |
| YBR135W   | CKS1      | 1 | msa            | na      | 150 |
| YBR136W   | MEC1      | 1 | unassigned     | na      | 555 |
| YBR136W   | MEC1      | 2 | msa            | na      | 419 |
| YBR136W   | MEC1      | 3 | unassigned     | na      | 267 |
| YBR136W   | MEC1      | 4 | msa            | na      | 135 |

|         |         |   |                |         |     |
|---------|---------|---|----------------|---------|-----|
| YBR136W | MEC1    | 5 | pfam           | PF02259 | 441 |
| YBR136W | MEC1    | 6 | psiblast       | 1e8yA_  | 155 |
| YBR136W | MEC1    | 7 | psiblast       | 1e8yA_  | 190 |
| YBR136W | MEC1    | 8 | psiblast       | 1e8yA_  | 206 |
| YBR137W | YBR137W | 1 | unassigned     | na      | 179 |
| YBR138C | YBR138C | 1 | unassigned     | na      | 524 |
| YBR139W | YBR139W | 1 | unassigned     | na      | 87  |
| YBR139W | YBR139W | 2 | psiblast       | 1ysc__  | 201 |
| YBR139W | YBR139W | 3 | psiblast       | 1ysc__  | 220 |
| YBR140C | IRA1    | 1 | msa            | na      | 401 |
| YBR140C | IRA1    | 2 | unassigned     | na      | 792 |
| YBR140C | IRA1    | 3 | msa            | na      | 378 |
| YBR140C | IRA1    | 4 | unassigned     | na      | 98  |
| YBR140C | IRA1    | 5 | psiblast       | 1nf1A_  | 132 |
| YBR140C | IRA1    | 6 | psiblast       | 1nf1A_  | 216 |
| YBR140C | IRA1    | 7 | msa            | na      | 725 |
| YBR140C | IRA1    | 8 | msa            | na      | 350 |
| YBR141C | YBR141C | 1 | unassigned     | na      | 86  |
| YBR141C | YBR141C | 2 | msa            | na      | 251 |
| YBR142W | MAK5    | 1 | msa            | na      | 163 |
| YBR142W | MAK5    | 2 | psiblast       | 1hv8A_  | 271 |
| YBR142W | MAK5    | 3 | psiblast       | 1hv8A_  | 163 |
| YBR142W | MAK5    | 4 | psiblast       | 1d2mA_  | 123 |
| YBR142W | MAK5    | 5 | unassigned     | na      | 53  |
| YBR143C | SUP45   | 1 | psiblast       | 1dt9A_  | 172 |
| YBR143C | SUP45   | 2 | psiblast       | 1dt9A_  | 128 |
| YBR143C | SUP45   | 3 | psiblast       | 1dt9A_  | 137 |
| YBR144C | YBR144C | 1 | unassigned     | na      | 104 |
| YBR145W | ADH5    | 1 | psiblast       | 1e3jA_  | 188 |
| YBR145W | ADH5    | 2 | psiblast       | 1e3jA_  | 163 |
| YBR146W | MRPS9   | 1 | unassigned     | na      | 140 |
| YBR146W | MRPS9   | 2 | psiblast       | 1fjgl_  | 138 |
| YBR147W | YBR147W | 1 | msa            | na      | 142 |
| YBR147W | YBR147W | 2 | unassigned     | na      | 154 |
| YBR148W | YSW1    | 1 | fold_recogniti | 1iu4A   | 281 |
| YBR148W | YSW1    | 2 | unassigned     | na      | 328 |
| YBR149W | ARA1    | 1 | psiblast       | 1llgA_  | 288 |
| YBR149W | ARA1    | 2 | psiblast       | 1llgA_  | 56  |
| YBR150C | TBS1    | 1 | unassigned     | na      | 57  |
| YBR150C | TBS1    | 2 | psiblast       | 1cld__  | 121 |
| YBR150C | TBS1    | 3 | unassigned     | na      | 160 |
| YBR150C | TBS1    | 4 | msa            | na      | 286 |
| YBR150C | TBS1    | 5 | unassigned     | na      | 291 |
| YBR150C | TBS1    | 6 | fold_recogniti | 1l8mA   | 60  |
| YBR150C | TBS1    | 7 | fold_recogniti | 1l8mA   | 119 |
| YBR151W | APD1    | 1 | msa            | na      | 241 |
| YBR151W | APD1    | 2 | psiblast       | 1f37A_  | 75  |
| YBR152W | SPP381  | 1 | fold_recogniti | 1l8mA   | 67  |

|           |         |   |                |        |     |
|-----------|---------|---|----------------|--------|-----|
| YBR152W   | SPP381  | 2 | fold_recogniti | 1l8mA  | 79  |
| YBR152W   | SPP381  | 3 | fold_recogniti | 1l8mA  | 70  |
| YBR152W   | SPP381  | 4 | fold_recogniti | 1l8mA  | 75  |
| YBR153W   | RIB7    | 1 | psiblast       | 1cz3A_ | 244 |
| YBR154C   | RPB5    | 1 | psiblast       | 1dzfA_ | 144 |
| YBR154C   | RPB5    | 2 | psiblast       | 1dzfA_ | 71  |
| YBR155W   | CNS1    | 1 | psiblast       | 1ihgA_ | 134 |
| YBR155W   | CNS1    | 2 | psiblast       | 1ihgA_ | 153 |
| YBR155W   | CNS1    | 3 | unassigned     | na     | 98  |
| YBR156C   | SLI15   | 1 | unassigned     | na     | 175 |
| YBR156C   | SLI15   | 2 | msa            | na     | 456 |
| YBR156C   | SLI15   | 3 | unassigned     | na     | 67  |
| YBR157C   | ICS2    | 1 | unassigned     | na     | 106 |
| YBR158W   | AMN1    | 1 | unassigned     | na     | 65  |
| YBR158W   | AMN1    | 2 | psiblast       | 1jl5A_ | 91  |
| YBR158W   | AMN1    | 3 | psiblast       | 2bnh__ | 77  |
| YBR158W   | AMN1    | 4 | psiblast       | 2bnh__ | 63  |
| YBR158W   | AMN1    | 5 | psiblast       | 2bnh__ | 51  |
| YBR158W   | AMN1    | 6 | psiblast       | 2bnh__ | 202 |
| YBR159W   | YBR159W | 1 | psiblast       | 1i01A_ | 347 |
| YBR160W   | CDC28   | 1 | psiblast       | 1aq1__ | 90  |
| YBR160W   | CDC28   | 2 | psiblast       | 1aq1__ | 82  |
| YBR160W   | CDC28   | 3 | psiblast       | 1aq1__ | 51  |
| YBR160W   | CDC28   | 4 | psiblast       | 1aq1__ | 75  |
| YBR161W   | CSH1    | 1 | msa            | na     | 376 |
| YBR162C   | TOS1    | 1 | unassigned     | na     | 214 |
| YBR162C   | TOS1    | 2 | msa            | na     | 241 |
| YBR162W-A | YSY6    | 1 | unassigned     | na     | 65  |
| YBR163W   | DEM1    | 1 | unassigned     | na     | 585 |
| YBR164C   | ARL1    | 1 | psiblast       | 1rrf__ | 183 |
| YBR165W   | UBS1    | 1 | unassigned     | na     | 277 |
| YBR166C   | TYR1    | 1 | psiblast       | 1pgn__ | 323 |
| YBR166C   | TYR1    | 2 | unassigned     | na     | 129 |
| YBR167C   | POP7    | 1 | unassigned     | na     | 140 |
| YBR168W   | PEX32   | 1 | unassigned     | na     | 174 |
| YBR168W   | PEX32   | 2 | msa            | na     | 239 |
| YBR169C   | SSE2    | 1 | psiblast       | 1hjoA_ | 191 |
| YBR169C   | SSE2    | 2 | psiblast       | 1hjoA_ | 119 |
| YBR169C   | SSE2    | 3 | psiblast       | 1hjoA_ | 75  |
| YBR169C   | SSE2    | 4 | psiblast       | 1dkyA_ | 181 |
| YBR169C   | SSE2    | 5 | psiblast       | 1dkyA_ | 127 |
| YBR170C   | NPL4    | 1 | unassigned     | na     | 208 |
| YBR170C   | NPL4    | 2 | msa            | na     | 372 |
| YBR171W   | SEC66   | 1 | unassigned     | na     | 206 |
| YBR172C   | SMY2    | 1 | unassigned     | na     | 208 |
| YBR172C   | SMY2    | 2 | psiblast       | 1i84S_ | 342 |
| YBR172C   | SMY2    | 3 | msa            | na     | 240 |
| YBR173C   | UMP1    | 1 | unassigned     | na     | 148 |

|           |           |   |                |         |     |
|-----------|-----------|---|----------------|---------|-----|
| YBR174C   | YBR174C   | 1 | unassigned     | na      | 104 |
| YBR175W   | SWD3      | 1 | psiblast       | 1erjA_  | 315 |
| YBR176W   | ECM31     | 1 | fold_recogniti | 1a50A   | 312 |
| YBR177C   | EHT1      | 1 | unassigned     | na      | 109 |
| YBR177C   | EHT1      | 2 | psiblast       | 1cqzA_  | 342 |
| YBR178W   | YBR178W   | 1 | unassigned     | na      | 124 |
| YBR179C   | FZO1      | 1 | unassigned     | na      | 128 |
| YBR179C   | FZO1      | 2 | psiblast       | 1jwyB_  | 415 |
| YBR179C   | FZO1      | 3 | msa            | na      | 152 |
| YBR179C   | FZO1      | 4 | unassigned     | na      | 160 |
| YBR180W   | DTR1      | 1 | unassigned     | na      | 83  |
| YBR180W   | DTR1      | 2 | psiblast       | 1ja5A_  | 489 |
| YBR181C   | RPS6B     | 1 | pfam           | PF01092 | 130 |
| YBR181C   | RPS6B     | 2 | msa            | na      | 106 |
| YBR182C   | SMP1      | 1 | psiblast       | 1egwA_  | 80  |
| YBR182C   | SMP1      | 2 | msa            | na      | 197 |
| YBR182C   | SMP1      | 3 | unassigned     | na      | 175 |
| YBR183W   | YPC1      | 1 | msa            | na      | 186 |
| YBR183W   | YPC1      | 2 | msa            | na      | 130 |
| YBR184W   | YBR184W   | 1 | unassigned     | na      | 523 |
| YBR185C   | MBA1      | 1 | unassigned     | na      | 278 |
| YBR186W   | PCH2      | 1 | msa            | na      | 221 |
| YBR186W   | PCH2      | 2 | psiblast       | 1e32A_  | 246 |
| YBR186W   | PCH2      | 3 | psiblast       | 1e32A_  | 69  |
| YBR187W   | YBR187W   | 1 | pfam           | PF01169 | 127 |
| YBR187W   | YBR187W   | 2 | unassigned     | na      | 61  |
| YBR187W   | YBR187W   | 3 | pfam           | PF01169 | 92  |
| YBR188C   | NTC20     | 1 | unassigned     | na      | 140 |
| YBR189W   | RPS9B     | 1 | psiblast       | 1k5xD_  | 65  |
| YBR189W   | RPS9B     | 2 | psiblast       | 1k5xD_  | 130 |
| YBR190W   | YBR190W   | 1 | unassigned     | na      | 103 |
| YBR191W   | RPL21A    | 1 | psiblast       | 1k5yQ_  | 160 |
| YBR191W-A | YBR191W-A | 1 | unassigned     | na      | 24  |
| YBR192W   | RIM2      | 1 | pfam           | PF00153 | 170 |
| YBR192W   | RIM2      | 2 | pfam           | PF00153 | 106 |
| YBR192W   | RIM2      | 3 | pfam           | PF00153 | 101 |
| YBR193C   | MED8      | 1 | unassigned     | na      | 223 |
| YBR194W   | SOY1      | 1 | unassigned     | na      | 123 |
| YBR195C   | MSI1      | 1 | psiblast       | 1gxrA_  | 111 |
| YBR195C   | MSI1      | 2 | psiblast       | 1gg2B_  | 311 |
| YBR196C   | PGI1      | 1 | psiblast       | 1gzdA_  | 316 |
| YBR196C   | PGI1      | 2 | psiblast       | 1gzdA_  | 238 |
| YBR197C   | YBR197C   | 1 | unassigned     | na      | 69  |
| YBR197C   | YBR197C   | 2 | msa            | na      | 148 |
| YBR198C   | TAF5      | 1 | msa            | na      | 165 |
| YBR198C   | TAF5      | 2 | unassigned     | na      | 237 |
| YBR198C   | TAF5      | 3 | psiblast       | 1erjA_  | 396 |
| YBR199W   | KTR4      | 1 | pfam           | PF01793 | 464 |



|         |         |                  |         |     |
|---------|---------|------------------|---------|-----|
| YBR200W | BEM1    | 1 unassigned     | na      | 66  |
| YBR200W | BEM1    | 2 psiblast       | 2ptk__  | 67  |
| YBR200W | BEM1    | 3 psiblast       | 2ptk__  | 105 |
| YBR200W | BEM1    | 4 psiblast       | 2ptk__  | 128 |
| YBR200W | BEM1    | 5 psiblast       | 1gd5A_  | 68  |
| YBR200W | BEM1    | 6 psiblast       | 1ip9A_  | 117 |
| YBR201W | DER1    | 1 msa            | na      | 134 |
| YBR201W | DER1    | 2 msa            | na      | 77  |
| YBR202W | CDC47   | 1 msa            | na      | 206 |
| YBR202W | CDC47   | 2 pfam           | PF00493 | 211 |
| YBR202W | CDC47   | 3 psiblast       | 1g8pA_  | 229 |
| YBR202W | CDC47   | 4 psiblast       | 1g8pA_  | 114 |
| YBR202W | CDC47   | 5 msa            | na      | 85  |
| YBR203W | COS111  | 1 unassigned     | na      | 184 |
| YBR203W | COS111  | 2 pfam           | PF00646 | 113 |
| YBR203W | COS111  | 3 unassigned     | na      | 627 |
| YBR204C | YBR204C | 1 unassigned     | na      | 85  |
| YBR204C | YBR204C | 2 pfam           | PF00561 | 290 |
| YBR205W | KTR3    | 1 pfam           | PF01793 | 404 |
| YBR206W | YBR206W | 1 unassigned     | na      | 107 |
| YBR207W | FTH1    | 1 pfam           | PF03239 | 465 |
| YBR208C | DUR1,2  | 1 psiblast       | 1gr8A_  | 483 |
| YBR208C | DUR1,2  | 2 unassigned     | na      | 121 |
| YBR208C | DUR1,2  | 3 psiblast       | 1bncA_  | 131 |
| YBR208C | DUR1,2  | 4 psiblast       | 1bncA_  | 145 |
| YBR208C | DUR1,2  | 5 psiblast       | 1bncA_  | 214 |
| YBR208C | DUR1,2  | 6 pfam           | PF02626 | 323 |
| YBR208C | DUR1,2  | 7 pfam           | PF02682 | 238 |
| YBR208C | DUR1,2  | 8 unassigned     | na      | 96  |
| YBR208C | DUR1,2  | 9 psiblast       | 1dczA_  | 84  |
| YBR209W | YBR209W | 1 unassigned     | na      | 105 |
| YBR210W | ERV15   | 1 pfam           | PF03311 | 142 |
| YBR211C | AME1    | 1 unassigned     | na      | 92  |
| YBR211C | AME1    | 2 fold_recogniti | 1qoyA   | 232 |
| YBR212W | NGR1    | 1 psiblast       | 1cvjA_  | 86  |
| YBR212W | NGR1    | 2 psiblast       | 1fxIA_  | 98  |
| YBR212W | NGR1    | 3 psiblast       | 1fxIA_  | 122 |
| YBR212W | NGR1    | 4 unassigned     | na      | 52  |
| YBR212W | NGR1    | 5 psiblast       | 1h6kX_  | 117 |
| YBR212W | NGR1    | 6 unassigned     | na      | 109 |
| YBR212W | NGR1    | 7 psiblast       | 1g9IA_  | 88  |
| YBR213W | MET8    | 1 psiblast       | 1kyqA_  | 179 |
| YBR213W | MET8    | 2 psiblast       | 1kyqA_  | 95  |
| YBR214W | SDS24   | 1 unassigned     | na      | 95  |
| YBR214W | SDS24   | 2 psiblast       | 1zfjA_  | 297 |
| YBR214W | SDS24   | 3 psiblast       | 1zfjA_  | 135 |
| YBR215W | HPC2    | 1 unassigned     | na      | 82  |
| YBR215W | HPC2    | 2 fold_recogniti | 1m2vB   | 326 |

|           |         |    |                |        |     |
|-----------|---------|----|----------------|--------|-----|
| YBR215W   | HPC2    | 3  | msa            | na     | 215 |
| YBR216C   | YBP1    | 1  | fold_recogniti | 1bgxT  | 92  |
| YBR216C   | YBP1    | 2  | fold_recogniti | 1bgxT  | 49  |
| YBR216C   | YBP1    | 3  | fold_recogniti | 1bgxT  | 481 |
| YBR216C   | YBP1    | 4  | fold_recogniti | 1bgxT  | 52  |
| YBR217W   | ATG12   | 1  | unassigned     | na     | 74  |
| YBR217W   | ATG12   | 2  | fold_recogniti | 1kjtA  | 112 |
| YBR218C   | PYC2    | 1  | psiblast       | 1lsrA_ | 129 |
| YBR218C   | PYC2    | 2  | psiblast       | 1lsrA_ | 80  |
| YBR218C   | PYC2    | 3  | psiblast       | 1lsrA_ | 136 |
| YBR218C   | PYC2    | 4  | psiblast       | 1lsrA_ | 130 |
| YBR218C   | PYC2    | 5  | unassigned     | na     | 61  |
| YBR218C   | PYC2    | 6  | fold_recogniti | 1lt7A  | 165 |
| YBR218C   | PYC2    | 7  | fold_recogniti | 1dhpA  | 231 |
| YBR218C   | PYC2    | 8  | fold_recogniti | 1dhpA  | 60  |
| YBR218C   | PYC2    | 9  | unassigned     | na     | 94  |
| YBR218C   | PYC2    | 10 | psiblast       | 1dczA_ | 94  |
| YBR220C   | YBR220C | 1  | msa            | na     | 244 |
| YBR220C   | YBR220C | 2  | msa            | na     | 207 |
| YBR220C   | YBR220C | 3  | msa            | na     | 109 |
| YBR221C   | PDB1    | 1  | psiblast       | 1ik6A_ | 231 |
| YBR221C   | PDB1    | 2  | psiblast       | 1ik6A_ | 135 |
| YBR222C   | PCS60   | 1  | psiblast       | 1ba3__ | 180 |
| YBR222C   | PCS60   | 2  | psiblast       | 1ba3__ | 253 |
| YBR222C   | PCS60   | 3  | psiblast       | 1ba3__ | 110 |
| YBR223C   | TDP1    | 1  | psiblast       | 1jy1A_ | 222 |
| YBR223C   | TDP1    | 2  | psiblast       | 1jy1A_ | 46  |
| YBR223C   | TDP1    | 3  | psiblast       | 1jy1A_ | 45  |
| YBR223C   | TDP1    | 4  | psiblast       | 1jy1A_ | 231 |
| YBR224W   | YBR224W | 1  | unassigned     | na     | 171 |
| YBR225W   | YBR225W | 1  | unassigned     | na     | 900 |
| YBR226C   | YBR226C | 1  | unassigned     | na     | 136 |
| YBR227C   | MCX1    | 1  | psiblast       | 1g3iA_ | 520 |
| YBR228W   | SLX1    | 1  | msa            | na     | 167 |
| YBR228W   | SLX1    | 2  | unassigned     | na     | 137 |
| YBR229C   | ROT2    | 1  | unassigned     | na     | 82  |
| YBR229C   | ROT2    | 2  | msa            | na     | 308 |
| YBR229C   | ROT2    | 3  | psiblast       | 2taaA_ | 196 |
| YBR229C   | ROT2    | 4  | msa            | na     | 228 |
| YBR229C   | ROT2    | 5  | msa            | na     | 140 |
| YBR230C   | YBR230C | 1  | unassigned     | na     | 134 |
| YBR231C   | SWC5    | 1  | msa            | na     | 303 |
| YBR232C   | YBR232C | 1  | unassigned     | na     | 119 |
| YBR233W   | PBP2    | 1  | psiblast       | 1j4wA_ | 143 |
| YBR233W   | PBP2    | 2  | psiblast       | 1j4wA_ | 100 |
| YBR233W   | PBP2    | 3  | unassigned     | na     | 79  |
| YBR233W   | PBP2    | 4  | psiblast       | 1j5kA_ | 91  |
| YBR233W-A | DAD3    | 1  | unassigned     | na     | 94  |

|         |         |   |                |         |     |
|---------|---------|---|----------------|---------|-----|
| YBR234C | ARC40   | 1 | psiblast       | 1k8kC_  | 384 |
| YBR235W | YBR235W | 1 | msa            | na      | 548 |
| YBR235W | YBR235W | 2 | msa            | na      | 202 |
| YBR235W | YBR235W | 3 | msa            | na      | 153 |
| YBR235W | YBR235W | 4 | unassigned     | na      | 217 |
| YBR236C | ABD1    | 1 | unassigned     | na      | 94  |
| YBR236C | ABD1    | 2 | psiblast       | 1ic3A_  | 113 |
| YBR236C | ABD1    | 3 | psiblast       | 1ic3A_  | 229 |
| YBR237W | PRP5    | 1 | msa            | na      | 218 |
| YBR237W | PRP5    | 2 | psiblast       | 1fuuA_  | 60  |
| YBR237W | PRP5    | 3 | psiblast       | 1gm5A_  | 271 |
| YBR237W | PRP5    | 4 | psiblast       | 1gm5A_  | 197 |
| YBR237W | PRP5    | 5 | fold_recogniti | 1k1gA   | 103 |
| YBR238C | YBR238C | 1 | fold_recogniti | 1l8mA   | 97  |
| YBR238C | YBR238C | 2 | fold_recogniti | 1l8mA   | 70  |
| YBR238C | YBR238C | 3 | fold_recogniti | 1l8mA   | 126 |
| YBR238C | YBR238C | 4 | unassigned     | na      | 438 |
| YBR239C | YBR239C | 1 | psiblast       | 1hwtC_  | 171 |
| YBR239C | YBR239C | 2 | unassigned     | na      | 182 |
| YBR239C | YBR239C | 3 | pfam           | PF00989 | 176 |
| YBR240C | THI2    | 1 | psiblast       | 1pyiA_  | 115 |
| YBR240C | THI2    | 2 | unassigned     | na      | 335 |
| YBR241C | YBR241C | 1 | psiblast       | 1ja5A_  | 423 |
| YBR241C | YBR241C | 2 | psiblast       | 1ja5A_  | 65  |
| YBR242W | YBR242W | 1 | unassigned     | na      | 71  |
| YBR242W | YBR242W | 2 | pfam           | PF01966 | 167 |
| YBR243C | ALG7    | 1 | unassigned     | na      | 115 |
| YBR243C | ALG7    | 2 | pfam           | PF00953 | 224 |
| YBR243C | ALG7    | 3 | msa            | na      | 109 |
| YBR244W | GPX2    | 1 | psiblast       | 1gp1A_  | 162 |
| YBR245C | ISW1    | 1 | msa            | na      | 122 |
| YBR245C | ISW1    | 2 | psiblast       | 1gm5A_  | 253 |
| YBR245C | ISW1    | 3 | unassigned     | na      | 58  |
| YBR245C | ISW1    | 4 | psiblast       | 1hv8A_  | 185 |
| YBR245C | ISW1    | 5 | msa            | na      | 372 |
| YBR245C | ISW1    | 6 | unassigned     | na      | 139 |
| YBR246W | YBR246W | 1 | psiblast       | 1gg2B_  | 387 |
| YBR247C | ENP1    | 1 | msa            | na      | 182 |
| YBR247C | ENP1    | 2 | msa            | na      | 146 |
| YBR247C | ENP1    | 3 | msa            | na      | 155 |
| YBR248C | HIS7    | 1 | psiblast       | 1jvnA_  | 237 |
| YBR248C | HIS7    | 2 | psiblast       | 1jvnA_  | 315 |
| YBR249C | ARO4    | 1 | psiblast       | 1gg1A_  | 370 |
| YBR250W | YBR250W | 1 | unassigned     | na      | 523 |
| YBR251W | MRPS5   | 1 | msa            | na      | 136 |
| YBR251W | MRPS5   | 2 | psiblast       | 1fjgE_  | 171 |
| YBR252W | DUT1    | 1 | psiblast       | 1dud__  | 147 |
| YBR253W | SRB6    | 1 | unassigned     | na      | 121 |

|           |           |   |                |        |      |
|-----------|-----------|---|----------------|--------|------|
| YBR254C   | TRS20     | 1 | unassigned     | na     | 175  |
| YBR255C-A | YBR255C-A | 1 | unassigned     | na     | 40   |
| YBR255W   | YBR255W   | 1 | unassigned     | na     | 331  |
| YBR255W   | YBR255W   | 2 | fold_recogniti | 1l2qA  | 280  |
| YBR255W   | YBR255W   | 3 | unassigned     | na     | 83   |
| YBR256C   | RIB5      | 1 | psiblast       | 1i8dA_ | 105  |
| YBR256C   | RIB5      | 2 | psiblast       | 1i8dA_ | 133  |
| YBR257W   | POP4      | 1 | unassigned     | na     | 162  |
| YBR257W   | POP4      | 2 | msa            | na     | 117  |
| YBR258C   | SHG1      | 1 | unassigned     | na     | 142  |
| YBR259W   | YBR259W   | 1 | unassigned     | na     | 688  |
| YBR260C   | RGD1      | 1 | psiblast       | 1i84S_ | 435  |
| YBR260C   | RGD1      | 2 | psiblast       | 1rgp__ | 124  |
| YBR260C   | RGD1      | 3 | psiblast       | 1rgp__ | 107  |
| YBR261C   | YBR261C   | 1 | psiblast       | 1l1eA_ | 232  |
| YBR262C   | FMP51     | 1 | unassigned     | na     | 106  |
| YBR263W   | SHM1      | 1 | unassigned     | na     | 92   |
| YBR263W   | SHM1      | 2 | psiblast       | 1cj0A_ | 200  |
| YBR263W   | SHM1      | 3 | psiblast       | 1cj0A_ | 273  |
| YBR264C   | YPT10     | 1 | psiblast       | 1huqA_ | 218  |
| YBR265W   | TSC10     | 1 | psiblast       | 1gcoA_ | 320  |
| YBR266C   | YBR266C   | 1 | unassigned     | na     | 150  |
| YBR267W   | YBR267W   | 1 | psiblast       | 1meyG_ | 94   |
| YBR267W   | YBR267W   | 2 | psiblast       | 1tf6A_ | 196  |
| YBR267W   | YBR267W   | 3 | unassigned     | na     | 103  |
| YBR268W   | MRPL37    | 1 | unassigned     | na     | 105  |
| YBR269C   | FMP21     | 1 | psiblast       | 1khoA_ | 130  |
| YBR270C   | YBR270C   | 1 | unassigned     | na     | 545  |
| YBR271W   | YBR271W   | 1 | unassigned     | na     | 89   |
| YBR271W   | YBR271W   | 2 | msa            | na     | 103  |
| YBR271W   | YBR271W   | 3 | psiblast       | 1f3lA_ | 227  |
| YBR272C   | HSM3      | 1 | fold_recogniti | 1qoyA  | 360  |
| YBR272C   | HSM3      | 2 | unassigned     | na     | 120  |
| YBR273C   | UBX7      | 1 | unassigned     | na     | 78   |
| YBR273C   | UBX7      | 2 | msa            | na     | 116  |
| YBR273C   | UBX7      | 3 | psiblast       | 1jruA_ | 129  |
| YBR273C   | UBX7      | 4 | unassigned     | na     | 113  |
| YBR274W   | CHK1      | 1 | psiblast       | 1ia8A_ | 79   |
| YBR274W   | CHK1      | 2 | psiblast       | 1ia8A_ | 102  |
| YBR274W   | CHK1      | 3 | psiblast       | 1ia8A_ | 126  |
| YBR274W   | CHK1      | 4 | psiblast       | 1iq5A_ | 88   |
| YBR274W   | CHK1      | 5 | psiblast       | 1iq5A_ | 132  |
| YBR275C   | RIF1      | 1 | msa            | na     | 1127 |
| YBR275C   | RIF1      | 2 | unassigned     | na     | 789  |
| YBR276C   | PPS1      | 1 | unassigned     | na     | 446  |
| YBR276C   | PPS1      | 2 | msa            | na     | 137  |
| YBR276C   | PPS1      | 3 | psiblast       | 1ikzA_ | 224  |
| YBR277C   | YBR277C   | 1 | unassigned     | na     | 133  |

|         |         |   |                |         |     |
|---------|---------|---|----------------|---------|-----|
| YBR278W | DPB3    | 1 | fold_recogniti | 1jfiA   | 109 |
| YBR278W | DPB3    | 2 | unassigned     | na      | 92  |
| YBR279W | PAF1    | 1 | unassigned     | na      | 193 |
| YBR279W | PAF1    | 2 | msa            | na      | 252 |
| YBR280C | YBR280C | 1 | unassigned     | na      | 287 |
| YBR280C | YBR280C | 2 | psiblast       | 1a12A_  | 355 |
| YBR281C | YBR281C | 1 | psiblast       | 1gg2B_  | 410 |
| YBR281C | YBR281C | 2 | psiblast       | 1cg2A_  | 311 |
| YBR281C | YBR281C | 3 | psiblast       | 1cg2A_  | 157 |
| YBR282W | MRPL27  | 1 | unassigned     | na      | 146 |
| YBR283C | SSH1    | 1 | msa            | na      | 74  |
| YBR283C | SSH1    | 2 | pfam           | PF00344 | 416 |
| YBR284W | YBR284W | 1 | unassigned     | na      | 213 |
| YBR284W | YBR284W | 2 | pfam           | PF00962 | 584 |
| YBR285W | YBR285W | 1 | unassigned     | na      | 144 |
| YBR286W | APE3    | 1 | unassigned     | na      | 56  |
| YBR286W | APE3    | 2 | fold_recogniti | 1de4C   | 82  |
| YBR286W | APE3    | 3 | fold_recogniti | 1de4C   | 86  |
| YBR286W | APE3    | 4 | psiblast       | 1cp7A_  | 313 |
| YBR287W | ZSP1    | 1 | msa            | na      | 140 |
| YBR287W | ZSP1    | 2 | unassigned     | na      | 287 |
| YBR288C | APM3    | 1 | psiblast       | 1gw5M_  | 166 |
| YBR288C | APM3    | 2 | psiblast       | 1gw5M_  | 317 |
| YBR289W | SNF5    | 1 | fold_recogniti | 1i3qA   | 123 |
| YBR289W | SNF5    | 2 | fold_recogniti | 1m2vB   | 415 |
| YBR289W | SNF5    | 3 | unassigned     | na      | 367 |
| YBR290W | BSD2    | 1 | unassigned     | na      | 126 |
| YBR290W | BSD2    | 2 | msa            | na      | 108 |
| YBR290W | BSD2    | 3 | unassigned     | na      | 87  |
| YBR291C | CTP1    | 1 | pfam           | PF00153 | 105 |
| YBR291C | CTP1    | 2 | pfam           | PF00153 | 106 |
| YBR291C | CTP1    | 3 | pfam           | PF00153 | 88  |
| YBR292C | YBR292C | 1 | unassigned     | na      | 123 |
| YBR293W | YBR293W | 1 | psiblast       | 1lviA_  | 191 |
| YBR293W | YBR293W | 2 | msa            | na      | 213 |
| YBR293W | YBR293W | 3 | unassigned     | na      | 70  |
| YBR294W | SUL1    | 1 | unassigned     | na      | 79  |
| YBR294W | SUL1    | 2 | msa            | na      | 119 |
| YBR294W | SUL1    | 3 | pfam           | PF00916 | 374 |
| YBR294W | SUL1    | 4 | unassigned     | na      | 55  |
| YBR294W | SUL1    | 5 | pfam           | PF01740 | 160 |
| YBR294W | SUL1    | 6 | unassigned     | na      | 72  |
| YBR295W | PCA1    | 1 | unassigned     | na      | 313 |
| YBR295W | PCA1    | 2 | psiblast       | 1aw0__  | 76  |
| YBR295W | PCA1    | 3 | unassigned     | na      | 67  |
| YBR295W | PCA1    | 4 | psiblast       | 1kqkA_  | 106 |
| YBR295W | PCA1    | 5 | psiblast       | 1eulA_  | 146 |
| YBR295W | PCA1    | 6 | psiblast       | 1eulA_  | 152 |

|           |           |    |                |         |     |
|-----------|-----------|----|----------------|---------|-----|
| YBR295W   | PCA1      | 7  | psiblast       | 1eulA_  | 77  |
| YBR295W   | PCA1      | 8  | psiblast       | 1f5sA_  | 64  |
| YBR295W   | PCA1      | 9  | psiblast       | 1f5sA_  | 153 |
| YBR295W   | PCA1      | 10 | msa            | na      | 62  |
| YBR296C   | PHO89     | 1  | pfam           | PF01384 | 574 |
| YBR297W   | MAL33     | 1  | psiblast       | 1ajyA_  | 76  |
| YBR297W   | MAL33     | 2  | msa            | na      | 210 |
| YBR297W   | MAL33     | 3  | unassigned     | na      | 182 |
| YBR298C   | MAL31     | 1  | unassigned     | na      | 76  |
| YBR298C   | MAL31     | 2  | psiblast       | 1ja5A_  | 423 |
| YBR298C   | MAL31     | 3  | psiblast       | 1ja5A_  | 115 |
| YBR299W   | MAL32     | 1  | psiblast       | 1uok__  | 299 |
| YBR299W   | MAL32     | 2  | psiblast       | 1uok__  | 285 |
| YBR300C   | YBR300C   | 1  | unassigned     | na      | 165 |
| YBR301W   | DAN3      | 1  | pfam           | PF00660 | 120 |
| YBR302C   | COS2      | 1  | msa            | na      | 61  |
| YBR302C   | COS2      | 2  | pfam           | PF00674 | 108 |
| YBR302C   | COS2      | 3  | unassigned     | na      | 72  |
| YBR302C   | COS2      | 4  | pfam           | PF00674 | 138 |
| YCL001W   | RER1      | 1  | pfam           | PF03248 | 188 |
| YCL001W-A | YCL001W-A | 1  | fold_recogniti | 1dt9A   | 153 |
| YCL001W-B | YCL001W-B | 1  | psiblast       | 1dt9A_  | 84  |
| YCL002C   | YCL002C   | 1  | unassigned     | na      | 152 |
| YCL004W   | PGS1      | 1  | msa            | na      | 68  |
| YCL004W   | PGS1      | 2  | psiblast       | 1f0iA_  | 453 |
| YCL005W   | YCL005W   | 1  | unassigned     | na      | 256 |
| YCL007C   | YCL007C   | 1  | unassigned     | na      | 130 |
| YCL008C   | STP22     | 1  | psiblast       | 1kppA_  | 205 |
| YCL008C   | STP22     | 2  | msa            | na      | 91  |
| YCL009C   | ILV6      | 1  | fold_recogniti | 1in9A   | 190 |
| YCL009C   | ILV6      | 2  | msa            | na      | 119 |
| YCL010C   | SGF29     | 1  | msa            | na      | 135 |
| YCL010C   | SGF29     | 2  | msa            | na      | 124 |
| YCL011C   | GBP2      | 1  | psiblast       | 1cvjA_  | 112 |
| YCL011C   | GBP2      | 2  | psiblast       | 1cvjA_  | 98  |
| YCL011C   | GBP2      | 3  | psiblast       | 1fxIA_  | 119 |
| YCL011C   | GBP2      | 4  | psiblast       | 2mssA_  | 98  |
| YCL014W   | BUD3      | 1  | unassigned     | na      | 240 |
| YCL014W   | BUD3      | 2  | msa            | na      | 395 |
| YCL014W   | BUD3      | 3  | msa            | na      | 923 |
| YCL014W   | BUD3      | 4  | unassigned     | na      | 78  |
| YCL016C   | DCC1      | 1  | msa            | na      | 223 |
| YCL016C   | DCC1      | 2  | msa            | na      | 157 |
| YCL017C   | NFS1      | 1  | unassigned     | na      | 70  |
| YCL017C   | NFS1      | 2  | psiblast       | 1ecxA_  | 174 |
| YCL017C   | NFS1      | 3  | psiblast       | 1ecxA_  | 253 |
| YCL018W   | LEU2      | 1  | psiblast       | 2ayqA_  | 364 |
| YCL021W-A | YCL021W-A | 1  | unassigned     | na      | 125 |

|           |           |   |                |         |     |
|-----------|-----------|---|----------------|---------|-----|
| YCL023C   | YCL023C   | 1 | unassigned     | na      | 115 |
| YCL024W   | KCC4      | 1 | psiblast       | 1a06__  | 198 |
| YCL024W   | KCC4      | 2 | psiblast       | 1a06__  | 198 |
| YCL024W   | KCC4      | 3 | unassigned     | na      | 229 |
| YCL024W   | KCC4      | 4 | fold_recogniti | 1iu4A   | 293 |
| YCL024W   | KCC4      | 5 | unassigned     | na      | 119 |
| YCL025C   | AGP1      | 1 | unassigned     | na      | 87  |
| YCL025C   | AGP1      | 2 | pfam           | PF00324 | 508 |
| YCL026C-A | FRM2      | 1 | psiblast       | 1bkjA_  | 193 |
| YCL026C-B | YCL026C-B | 1 | unassigned     | na      | 193 |
| YCL027W   | FUS1      | 1 | unassigned     | na      | 430 |
| YCL027W   | FUS1      | 2 | pfam           | PF00018 | 82  |
| YCL028W   | RNQ1      | 1 | fold_recogniti | 1i3qA   | 405 |
| YCL029C   | BIK1      | 1 | psiblast       | 1lplA_  | 60  |
| YCL029C   | BIK1      | 2 | psiblast       | 1i84S_  | 380 |
| YCL030C   | HIS4      | 1 | msa            | na      | 55  |
| YCL030C   | HIS4      | 2 | unassigned     | na      | 65  |
| YCL030C   | HIS4      | 3 | pfam           | PF01502 | 123 |
| YCL030C   | HIS4      | 4 | pfam           | PF01503 | 101 |
| YCL030C   | HIS4      | 5 | psiblast       | 1k75A_  | 241 |
| YCL030C   | HIS4      | 6 | psiblast       | 1k75A_  | 214 |
| YCL031C   | RRP7      | 1 | msa            | na      | 152 |
| YCL031C   | RRP7      | 2 | msa            | na      | 145 |
| YCL032W   | STE50     | 1 | unassigned     | na      | 196 |
| YCL032W   | STE50     | 2 | pfam           | PF00788 | 150 |
| YCL033C   | YCL033C   | 1 | psiblast       | 1l1dA_  | 168 |
| YCL034W   | LSB5      | 1 | fold_recogniti | 1jwfA   | 91  |
| YCL034W   | LSB5      | 2 | fold_recogniti | 1jwfA   | 77  |
| YCL034W   | LSB5      | 3 | unassigned     | na      | 186 |
| YCL035C   | GRX1      | 1 | psiblast       | 1jhb__  | 110 |
| YCL036W   | GFD2      | 1 | unassigned     | na      | 259 |
| YCL036W   | GFD2      | 2 | msa            | na      | 248 |
| YCL036W   | GFD2      | 3 | unassigned     | na      | 59  |
| YCL037C   | SRO9      | 1 | fold_recogniti | 1i3qA   | 279 |
| YCL037C   | SRO9      | 2 | msa            | na      | 187 |
| YCL038C   | ATG22     | 1 | msa            | na      | 194 |
| YCL038C   | ATG22     | 2 | unassigned     | na      | 89  |
| YCL038C   | ATG22     | 3 | msa            | na      | 245 |
| YCL039W   | GID7      | 1 | unassigned     | na      | 177 |
| YCL039W   | GID7      | 2 | psiblast       | 1gg2B_  | 393 |
| YCL039W   | GID7      | 3 | psiblast       | 1erjA_  | 175 |
| YCL040W   | GLK1      | 1 | psiblast       | 1ig8A_  | 103 |
| YCL040W   | GLK1      | 2 | psiblast       | 1ig8A_  | 397 |
| YCL041C   | YCL041C   | 1 | unassigned     | na      | 164 |
| YCL042W   | YCL042W   | 1 | unassigned     | na      | 119 |
| YCL043C   | PD11      | 1 | psiblast       | 1mek__  | 142 |
| YCL043C   | PD11      | 2 | psiblast       | 1bjx__  | 167 |
| YCL043C   | PD11      | 3 | unassigned     | na      | 61  |

|           |           |   |                |        |     |
|-----------|-----------|---|----------------|--------|-----|
| YCL043C   | PDI1      | 4 | psiblast       | 1t7pB_ | 152 |
| YCL044C   | YCL044C   | 1 | msa            | na     | 215 |
| YCL044C   | YCL044C   | 2 | unassigned     | na     | 202 |
| YCL045C   | YCL045C   | 1 | unassigned     | na     | 201 |
| YCL045C   | YCL045C   | 2 | msa            | na     | 559 |
| YCL046W   | YCL046W   | 1 | unassigned     | na     | 107 |
| YCL047C   | YCL047C   | 1 | fold_recogniti | 1k4kA  | 258 |
| YCL048W   | YCL048W   | 1 | psiblast       | 1igrA_ | 166 |
| YCL048W   | YCL048W   | 2 | psiblast       | 1j15A_ | 245 |
| YCL048W   | YCL048W   | 3 | unassigned     | na     | 52  |
| YCL049C   | YCL049C   | 1 | unassigned     | na     | 133 |
| YCL049C   | YCL049C   | 2 | msa            | na     | 179 |
| YCL050C   | APA1      | 1 | fold_recogniti | 1gupA  | 185 |
| YCL050C   | APA1      | 2 | unassigned     | na     | 136 |
| YCL051W   | LRE1      | 1 | msa            | na     | 325 |
| YCL051W   | LRE1      | 2 | unassigned     | na     | 258 |
| YCL052C   | PBN1      | 1 | unassigned     | na     | 174 |
| YCL052C   | PBN1      | 2 | msa            | na     | 242 |
| YCL054W   | SPB1      | 1 | psiblast       | 1eizA_ | 204 |
| YCL054W   | SPB1      | 2 | psiblast       | 1i84S_ | 328 |
| YCL054W   | SPB1      | 3 | psiblast       | 2tmaA_ | 97  |
| YCL054W   | SPB1      | 4 | psiblast       | 2tmaA_ | 84  |
| YCL054W   | SPB1      | 5 | msa            | na     | 128 |
| YCL055W   | KAR4      | 1 | unassigned     | na     | 58  |
| YCL055W   | KAR4      | 2 | msa            | na     | 277 |
| YCL056C   | YCL056C   | 1 | unassigned     | na     | 144 |
| YCL057C-A | YCL057C-A | 1 | unassigned     | na     | 97  |
| YCL057W   | PRD1      | 1 | psiblast       | 1i1iP_ | 311 |
| YCL057W   | PRD1      | 2 | psiblast       | 1i1iP_ | 401 |
| YCL058C   | FYV5      | 1 | unassigned     | na     | 152 |
| YCL059C   | KRR1      | 1 | fold_recogniti | 1j4wA  | 123 |
| YCL059C   | KRR1      | 2 | fold_recogniti | 1j4wA  | 110 |
| YCL059C   | KRR1      | 3 | unassigned     | na     | 83  |
| YCL061C   | MRC1      | 1 | unassigned     | na     | 242 |
| YCL061C   | MRC1      | 2 | msa            | na     | 322 |
| YCL061C   | MRC1      | 3 | unassigned     | na     | 75  |
| YCL061C   | MRC1      | 4 | msa            | na     | 254 |
| YCL061C   | MRC1      | 5 | unassigned     | na     | 203 |
| YCL063W   | VAC17     | 1 | msa            | na     | 148 |
| YCL063W   | VAC17     | 2 | unassigned     | na     | 58  |
| YCL063W   | VAC17     | 3 | msa            | na     | 217 |
| YCL064C   | CHA1      | 1 | psiblast       | 1tdj__ | 239 |
| YCL064C   | CHA1      | 2 | psiblast       | 1tdj__ | 121 |
| YCL065W   | YCL065W   | 1 | unassigned     | na     | 122 |
| YCL066W   | HMLALPHA1 | 1 | unassigned     | na     | 175 |
| YCL067C   | HMLALPHA2 | 1 | unassigned     | na     | 101 |
| YCL067C   | HMLALPHA2 | 2 | psiblast       | 1mnmC_ | 109 |
| YCL068C   | YCL068C   | 1 | msa            | na     | 260 |



|         |         |   |                |         |     |
|---------|---------|---|----------------|---------|-----|
| YCL069W | YCL069W | 1 | msa            | na      | 336 |
| YCL069W | YCL069W | 2 | msa            | na      | 122 |
| YCL073C | YCL073C | 1 | psiblast       | 1ja5A_  | 406 |
| YCL073C | YCL073C | 2 | msa            | na      | 209 |
| YCL074W | YCL074W | 1 | fold_recogniti | 1c9rA   | 88  |
| YCL074W | YCL074W | 2 | fold_recogniti | 1c9rA   | 220 |
| YCL075W | YCL075W | 1 | psiblast       | 1a6bB_  | 53  |
| YCL075W | YCL075W | 2 | msa            | na      | 93  |
| YCL076W | YCL076W | 1 | msa            | na      | 247 |
| YCR001W | YCR001W | 1 | unassigned     | na      | 104 |
| YCR002C | CDC10   | 1 | psiblast       | 1egaA_  | 244 |
| YCR002C | CDC10   | 2 | msa            | na      | 78  |
| YCR003W | MRPL32  | 1 | unassigned     | na      | 71  |
| YCR003W | MRPL32  | 2 | psiblast       | 1jzxM_  | 112 |
| YCR004C | YCP4    | 1 | psiblast       | 1ag9A_  | 247 |
| YCR005C | CIT2    | 1 | psiblast       | 1cts__  | 356 |
| YCR005C | CIT2    | 2 | psiblast       | 1cts__  | 104 |
| YCR006C | YCR006C | 1 | unassigned     | na      | 157 |
| YCR007C | YCR007C | 1 | pfam           | PF00674 | 239 |
| YCR008W | SAT4    | 1 | fold_recogniti | 1i3qA   | 226 |
| YCR008W | SAT4    | 2 | unassigned     | na      | 53  |
| YCR008W | SAT4    | 3 | psiblast       | 1ia8A_  | 109 |
| YCR008W | SAT4    | 4 | psiblast       | 1ia8A_  | 79  |
| YCR008W | SAT4    | 5 | psiblast       | 1ia8A_  | 136 |
| YCR009C | RVS161  | 1 | psiblast       | 1i49A_  | 265 |
| YCR010C | ADY2    | 1 | pfam           | PF01184 | 283 |
| YCR011C | ADP1    | 1 | fold_recogniti | 1bziA   | 286 |
| YCR011C | ADP1    | 2 | unassigned     | na      | 91  |
| YCR011C | ADP1    | 3 | psiblast       | 1l2tA_  | 248 |
| YCR011C | ADP1    | 4 | msa            | na      | 273 |
| YCR011C | ADP1    | 5 | unassigned     | na      | 151 |
| YCR012W | PGK1    | 1 | psiblast       | 1qpg__  | 201 |
| YCR012W | PGK1    | 2 | psiblast       | 1qpg__  | 215 |
| YCR013C | YCR013C | 1 | msa            | na      | 215 |
| YCR014C | POL4    | 1 | msa            | na      | 91  |
| YCR014C | POL4    | 2 | unassigned     | na      | 58  |
| YCR014C | POL4    | 3 | psiblast       | 1jmsA_  | 115 |
| YCR014C | POL4    | 4 | psiblast       | 1jmsA_  | 54  |
| YCR014C | POL4    | 5 | psiblast       | 1jmsA_  | 264 |
| YCR015C | YCR015C | 1 | msa            | na      | 241 |
| YCR015C | YCR015C | 2 | unassigned     | na      | 76  |
| YCR016W | YCR016W | 1 | msa            | na      | 226 |
| YCR016W | YCR016W | 2 | unassigned     | na      | 64  |
| YCR017C | CWH43   | 1 | msa            | na      | 242 |
| YCR017C | CWH43   | 2 | unassigned     | na      | 389 |
| YCR017C | CWH43   | 3 | psiblast       | 1hd7A_  | 322 |
| YCR018C | SRD1    | 1 | unassigned     | na      | 139 |
| YCR018C | SRD1    | 2 | psiblast       | 4gatA_  | 82  |

|           |           |   |                |         |      |
|-----------|-----------|---|----------------|---------|------|
| YCR018C-A | YCR018C-A | 1 | unassigned     | na      | 84   |
| YCR019W   | MAK32     | 1 | psiblast       | 1rk2A_  | 363  |
| YCR020C   | PET18     | 1 | fold_recogniti | 1h0nA   | 132  |
| YCR020C   | PET18     | 2 | fold_recogniti | 1h0nA   | 83   |
| YCR020C-A | MAK31     | 1 | pfam           | PF01423 | 88   |
| YCR020W-B | HTL1      | 1 | unassigned     | na      | 78   |
| YCR021C   | HSP30     | 1 | psiblast       | 1c8rA_  | 332  |
| YCR022C   | YCR022C   | 1 | unassigned     | na      | 114  |
| YCR023C   | YCR023C   | 1 | psiblast       | 1lviA_  | 271  |
| YCR023C   | YCR023C   | 2 | unassigned     | na      | 340  |
| YCR024C   | YCR024C   | 1 | psiblast       | 1lkhA_  | 128  |
| YCR024C   | YCR024C   | 2 | psiblast       | 1lkhA_  | 364  |
| YCR024C-A | PMP1      | 1 | unassigned     | na      | 40   |
| YCR025C   | YCR025C   | 1 | unassigned     | na      | 136  |
| YCR026C   | YCR026C   | 1 | msa            | na      | 136  |
| YCR026C   | YCR026C   | 2 | psiblast       | 1e1zP_  | 357  |
| YCR026C   | YCR026C   | 3 | unassigned     | na      | 57   |
| YCR026C   | YCR026C   | 4 | msa            | na      | 86   |
| YCR026C   | YCR026C   | 5 | unassigned     | na      | 106  |
| YCR027C   | RHB1      | 1 | psiblast       | 1guaA_  | 209  |
| YCR028C   | FEN2      | 1 | psiblast       | 1ja5A_  | 472  |
| YCR028C   | FEN2      | 2 | psiblast       | 1ja5A_  | 40   |
| YCR028C-A | RIM1      | 1 | psiblast       | 3ulla_  | 135  |
| YCR030C   | SYP1      | 1 | msa            | na      | 150  |
| YCR030C   | SYP1      | 2 | unassigned     | na      | 227  |
| YCR030C   | SYP1      | 3 | fold_recogniti | 1deqA   | 227  |
| YCR030C   | SYP1      | 4 | unassigned     | na      | 126  |
| YCR030C   | SYP1      | 5 | msa            | na      | 140  |
| YCR031C   | RPS14A    | 1 | psiblast       | 1k5xK_  | 137  |
| YCR032W   | BPH1      | 1 | unassigned     | na      | 1252 |
| YCR032W   | BPH1      | 2 | msa            | na      | 180  |
| YCR032W   | BPH1      | 3 | unassigned     | na      | 90   |
| YCR032W   | BPH1      | 4 | pfam           | PF02138 | 281  |
| YCR032W   | BPH1      | 5 | psiblast       | 1gg2B_  | 364  |
| YCR033W   | SNT1      | 1 | msa            | na      | 551  |
| YCR033W   | SNT1      | 2 | unassigned     | na      | 105  |
| YCR033W   | SNT1      | 3 | pfam           | PF00249 | 123  |
| YCR033W   | SNT1      | 4 | unassigned     | na      | 96   |
| YCR033W   | SNT1      | 5 | pfam           | PF00249 | 93   |
| YCR033W   | SNT1      | 6 | unassigned     | na      | 258  |
| YCR034W   | FEN1      | 1 | pfam           | PF01151 | 347  |
| YCR035C   | RRP43     | 1 | pfam           | PF01138 | 277  |
| YCR035C   | RRP43     | 2 | pfam           | PF03725 | 117  |
| YCR036W   | RBK1      | 1 | psiblast       | 1rk2A_  | 333  |
| YCR037C   | PHO87     | 1 | pfam           | PF03105 | 368  |
| YCR037C   | PHO87     | 2 | unassigned     | na      | 67   |
| YCR037C   | PHO87     | 3 | msa            | na      | 488  |
| YCR038C   | BUD5      | 1 | unassigned     | na      | 150  |

|           |           |   |                |         |     |
|-----------|-----------|---|----------------|---------|-----|
| YCR038C   | BUD5      | 2 | psiblast       | 1bkdS_  | 236 |
| YCR038C   | BUD5      | 3 | psiblast       | 1bkdS_  | 256 |
| YCR038W-A | YCR038W-A | 1 | unassigned     | na      | 41  |
| YCR041W   | YCR041W   | 1 | unassigned     | na      | 110 |
| YCR042C   | TAF2      | 1 | fold_recogniti | 1h19A   | 240 |
| YCR042C   | TAF2      | 2 | psiblast       | 1hs6A_  | 147 |
| YCR042C   | TAF2      | 3 | psiblast       | 1hs6A_  | 130 |
| YCR042C   | TAF2      | 4 | psiblast       | 1hs6A_  | 172 |
| YCR042C   | TAF2      | 5 | psiblast       | 1hs6A_  | 100 |
| YCR042C   | TAF2      | 6 | msa            | na      | 162 |
| YCR042C   | TAF2      | 7 | unassigned     | na      | 456 |
| YCR043C   | YCR043C   | 1 | unassigned     | na      | 127 |
| YCR044C   | PER1      | 1 | unassigned     | na      | 98  |
| YCR044C   | PER1      | 2 | msa            | na      | 259 |
| YCR045C   | YCR045C   | 1 | psiblast       | 1scjB_  | 105 |
| YCR045C   | YCR045C   | 2 | psiblast       | 1ic6A_  | 320 |
| YCR045C   | YCR045C   | 3 | unassigned     | na      | 66  |
| YCR046C   | IMG1      | 1 | psiblast       | 1lnrN_  | 169 |
| YCR047C   | BUD23     | 1 | psiblast       | 1d2gA_  | 202 |
| YCR047C   | BUD23     | 2 | unassigned     | na      | 73  |
| YCR048W   | ARE1      | 1 | unassigned     | na      | 131 |
| YCR048W   | ARE1      | 2 | msa            | na      | 184 |
| YCR048W   | ARE1      | 3 | unassigned     | na      | 52  |
| YCR048W   | ARE1      | 4 | pfam           | PF01800 | 243 |
| YCR049C   | YCR049C   | 1 | unassigned     | na      | 148 |
| YCR050C   | YCR050C   | 1 | unassigned     | na      | 102 |
| YCR051W   | YCR051W   | 1 | psiblast       | 1bi8B_  | 69  |
| YCR051W   | YCR051W   | 2 | psiblast       | 1bi8B_  | 80  |
| YCR051W   | YCR051W   | 3 | psiblast       | 1ycsB_  | 73  |
| YCR052W   | RSC6      | 1 | msa            | na      | 266 |
| YCR052W   | RSC6      | 2 | unassigned     | na      | 60  |
| YCR052W   | RSC6      | 3 | msa            | na      | 157 |
| YCR053W   | THR4      | 1 | psiblast       | 1kl7A_  | 146 |
| YCR053W   | THR4      | 2 | psiblast       | 1kl7A_  | 368 |
| YCR054C   | CTR86     | 1 | unassigned     | na      | 418 |
| YCR054C   | CTR86     | 2 | msa            | na      | 145 |
| YCR057C   | PWP2      | 1 | msa            | na      | 84  |
| YCR057C   | PWP2      | 2 | psiblast       | 1gxrA_  | 332 |
| YCR057C   | PWP2      | 3 | psiblast       | 1gg2B_  | 85  |
| YCR057C   | PWP2      | 4 | psiblast       | 1erjA_  | 175 |
| YCR057C   | PWP2      | 5 | unassigned     | na      | 67  |
| YCR057C   | PWP2      | 6 | msa            | na      | 180 |
| YCR059C   | YIH1      | 1 | msa            | na      | 108 |
| YCR059C   | YIH1      | 2 | pfam           | PF01205 | 150 |
| YCR060W   | TAH1      | 1 | psiblast       | 1elwA_  | 111 |
| YCR061W   | YCR061W   | 1 | msa            | na      | 493 |
| YCR061W   | YCR061W   | 2 | msa            | na      | 138 |
| YCR063W   | BUD31     | 1 | pfam           | PF01125 | 157 |

|           |         |    |                |         |     |
|-----------|---------|----|----------------|---------|-----|
| YCR064C   | YCR064C | 1  | unassigned     | na      | 136 |
| YCR065W   | HCM1    | 1  | unassigned     | na      | 102 |
| YCR065W   | HCM1    | 2  | psiblast       | 2hdcA_  | 107 |
| YCR065W   | HCM1    | 3  | msa            | na      | 289 |
| YCR065W   | HCM1    | 4  | unassigned     | na      | 66  |
| YCR066W   | RAD18   | 1  | psiblast       | 1jm7A_  | 100 |
| YCR066W   | RAD18   | 2  | psiblast       | 1fre__  | 42  |
| YCR066W   | RAD18   | 3  | unassigned     | na      | 124 |
| YCR066W   | RAD18   | 4  | pfam           | PF02037 | 77  |
| YCR066W   | RAD18   | 5  | unassigned     | na      | 144 |
| YCR067C   | SED4    | 1  | psiblast       | 1scgB_  | 93  |
| YCR067C   | SED4    | 2  | psiblast       | 1b9xA_  | 339 |
| YCR067C   | SED4    | 3  | fold_recogniti | 1m2vB   | 296 |
| YCR067C   | SED4    | 4  | fold_recogniti | 1deqA   | 198 |
| YCR067C   | SED4    | 5  | msa            | na      | 139 |
| YCR068W   | ATG15   | 1  | unassigned     | na      | 220 |
| YCR068W   | ATG15   | 2  | psiblast       | 1dt3A_  | 151 |
| YCR068W   | ATG15   | 3  | msa            | na      | 149 |
| YCR069W   | CPR4    | 1  | psiblast       | 1dywA_  | 264 |
| YCR069W   | CPR4    | 2  | unassigned     | na      | 54  |
| YCR071C   | IMG2    | 1  | unassigned     | na      | 146 |
| YCR072C   | YCR072C | 1  | psiblast       | 1gxA_   | 111 |
| YCR072C   | YCR072C | 2  | psiblast       | 1gg2B_  | 319 |
| YCR072C   | YCR072C | 3  | psiblast       | 1erjA_  | 85  |
| YCR073C   | SSK22   | 1  | unassigned     | na      | 103 |
| YCR073C   | SSK22   | 2  | fold_recogniti | 1hciA   | 164 |
| YCR073C   | SSK22   | 3  | fold_recogniti | 1hciA   | 111 |
| YCR073C   | SSK22   | 4  | fold_recogniti | 1hciA   | 124 |
| YCR073C   | SSK22   | 5  | fold_recogniti | 1hciA   | 139 |
| YCR073C   | SSK22   | 6  | unassigned     | na      | 201 |
| YCR073C   | SSK22   | 7  | psiblast       | 1f3mA_  | 100 |
| YCR073C   | SSK22   | 8  | unassigned     | na      | 57  |
| YCR073C   | SSK22   | 9  | psiblast       | 1f3mC_  | 115 |
| YCR073C   | SSK22   | 10 | psiblast       | 1f3mC_  | 217 |
| YCR073W-A | SOL2    | 1  | psiblast       | 1d9tA_  | 315 |
| YCR075C   | ERS1    | 1  | unassigned     | na      | 108 |
| YCR075C   | ERS1    | 2  | msa            | na      | 152 |
| YCR076C   | YCR076C | 1  | unassigned     | na      | 89  |
| YCR076C   | YCR076C | 2  | fold_recogniti | 1deqA   | 161 |
| YCR077C   | PAT1    | 1  | fold_recogniti | 1deqA   | 227 |
| YCR077C   | PAT1    | 2  | msa            | na      | 197 |
| YCR077C   | PAT1    | 3  | unassigned     | na      | 372 |
| YCR079W   | YCR079W | 1  | unassigned     | na      | 93  |
| YCR079W   | YCR079W | 2  | psiblast       | 1a6q__  | 349 |
| YCR081W   | SRB8    | 1  | msa            | na      | 340 |
| YCR081W   | SRB8    | 2  | unassigned     | na      | 325 |
| YCR081W   | SRB8    | 3  | msa            | na      | 394 |
| YCR081W   | SRB8    | 4  | unassigned     | na      | 368 |

|           |           |   |                |         |     |
|-----------|-----------|---|----------------|---------|-----|
| YCR082W   | AHC2      | 1 | unassigned     | na      | 128 |
| YCR083W   | TRX3      | 1 | psiblast       | 1erv__  | 127 |
| YCR084C   | TUP1      | 1 | fold_recogniti | 1ldvA   | 281 |
| YCR084C   | TUP1      | 2 | psiblast       | 1erjA_  | 432 |
| YCR085W   | YCR085W   | 1 | unassigned     | na      | 117 |
| YCR086W   | CSM1      | 1 | unassigned     | na      | 190 |
| YCR087C-A | YCR087C-A | 1 | unassigned     | na      | 153 |
| YCR087W   | YCR087W   | 1 | unassigned     | na      | 171 |
| YCR088W   | ABP1      | 1 | psiblast       | 1hqz1_  | 170 |
| YCR088W   | ABP1      | 2 | fold_recogniti | 1ei3A   | 274 |
| YCR088W   | ABP1      | 3 | fold_recogniti | 1m2vB   | 89  |
| YCR088W   | ABP1      | 4 | psiblast       | 1jo8A_  | 59  |
| YCR089W   | FIG2      | 1 | msa            | na      | 174 |
| YCR089W   | FIG2      | 2 | unassigned     | na      | 134 |
| YCR089W   | FIG2      | 3 | msa            | na      | 317 |
| YCR089W   | FIG2      | 4 | msa            | na      | 251 |
| YCR089W   | FIG2      | 5 | msa            | na      | 418 |
| YCR089W   | FIG2      | 6 | msa            | na      | 315 |
| YCR090C   | YCR090C   | 1 | unassigned     | na      | 182 |
| YCR091W   | KIN82     | 1 | unassigned     | na      | 175 |
| YCR091W   | KIN82     | 2 | psiblast       | 1qcfA_  | 125 |
| YCR091W   | KIN82     | 3 | psiblast       | 1qcfA_  | 91  |
| YCR091W   | KIN82     | 4 | psiblast       | 1qcfA_  | 84  |
| YCR091W   | KIN82     | 5 | psiblast       | 1qcfA_  | 111 |
| YCR091W   | KIN82     | 6 | psiblast       | 1ctpE_  | 79  |
| YCR091W   | KIN82     | 7 | unassigned     | na      | 55  |
| YCR092C   | MSH3      | 1 | unassigned     | na      | 116 |
| YCR092C   | MSH3      | 2 | psiblast       | 1e3mA_  | 165 |
| YCR092C   | MSH3      | 3 | psiblast       | 1e3mA_  | 163 |
| YCR092C   | MSH3      | 4 | psiblast       | 1e3mA_  | 303 |
| YCR092C   | MSH3      | 5 | psiblast       | 1e3mA_  | 213 |
| YCR092C   | MSH3      | 6 | psiblast       | 1e3mA_  | 87  |
| YCR093W   | CDC39     | 1 | unassigned     | na      | 527 |
| YCR093W   | CDC39     | 2 | msa            | na      | 227 |
| YCR093W   | CDC39     | 3 | unassigned     | na      | 126 |
| YCR093W   | CDC39     | 4 | msa            | na      | 196 |
| YCR093W   | CDC39     | 5 | unassigned     | na      | 275 |
| YCR093W   | CDC39     | 6 | msa            | na      | 421 |
| YCR093W   | CDC39     | 7 | unassigned     | na      | 336 |
| YCR094W   | CDC50     | 1 | pfam           | PF03381 | 391 |
| YCR095C   | YCR095C   | 1 | fold_recogniti | 1vhrA   | 226 |
| YCR095C   | YCR095C   | 2 | msa            | na      | 136 |
| YCR096C   | HMRA2     | 1 | psiblast       | 1mnmC_  | 119 |
| YCR097W   | HMRA1     | 1 | psiblast       | 1f43A_  | 126 |
| YCR097W-A | YCR097W-A | 1 | unassigned     | na      | 88  |
| YCR098C   | GIT1      | 1 | psiblast       | 1ja5A_  | 518 |
| YCR099C   | YCR099C   | 1 | fold_recogniti | 1jv2B   | 155 |
| YCR100C   | YCR100C   | 1 | msa            | na      | 108 |

|           |           |   |                |         |     |
|-----------|-----------|---|----------------|---------|-----|
| YCR100C   | YCR100C   | 2 | msa            | na      | 208 |
| YCR101C   | YCR101C   | 1 | unassigned     | na      | 182 |
| YCR102C   | YCR102C   | 1 | psiblast       | 1tehA_  | 224 |
| YCR102C   | YCR102C   | 2 | psiblast       | 1tehA_  | 144 |
| YCR102W-A | YCR102W-A | 1 | unassigned     | na      | 65  |
| YCR104W   | PAU3      | 1 | pfam           | PF00660 | 124 |
| YCR105W   | ADH7      | 1 | psiblast       | 1hdzA_  | 224 |
| YCR105W   | ADH7      | 2 | psiblast       | 1hdzA_  | 137 |
| YCR106W   | RDS1      | 1 | psiblast       | 1hwtD_  | 100 |
| YCR106W   | RDS1      | 2 | msa            | na      | 414 |
| YCR106W   | RDS1      | 3 | unassigned     | na      | 318 |
| YCR107W   | AAD3      | 1 | psiblast       | 1gveA_  | 270 |
| YCR107W   | AAD3      | 2 | psiblast       | 1gveA_  | 93  |
| YDL001W   | RMD1      | 1 | unassigned     | na      | 126 |
| YDL001W   | RMD1      | 2 | pfam           | PF02582 | 304 |
| YDL002C   | NHP10     | 1 | psiblast       | 1aab__  | 77  |
| YDL002C   | NHP10     | 2 | psiblast       | 1cg7A_  | 126 |
| YDL003W   | MCD1      | 1 | msa            | na      | 210 |
| YDL003W   | MCD1      | 2 | unassigned     | na      | 356 |
| YDL004W   | ATP16     | 1 | psiblast       | 1e79H_  | 117 |
| YDL004W   | ATP16     | 2 | psiblast       | 1e79H_  | 43  |
| YDL005C   | MED2      | 1 | unassigned     | na      | 132 |
| YDL005C   | MED2      | 2 | fold_recogniti | 1l8mA   | 74  |
| YDL005C   | MED2      | 3 | fold_recogniti | 1l8mA   | 80  |
| YDL005C   | MED2      | 4 | fold_recogniti | 1l8mA   | 70  |
| YDL005C   | MED2      | 5 | fold_recogniti | 1l8mA   | 75  |
| YDL006W   | PTC1      | 1 | psiblast       | 1a6q__  | 281 |
| YDL007W   | RPT2      | 1 | psiblast       | 1e32A_  | 178 |
| YDL007W   | RPT2      | 2 | psiblast       | 1e32A_  | 174 |
| YDL007W   | RPT2      | 3 | psiblast       | 1e32A_  | 85  |
| YDL008W   | APC11     | 1 | psiblast       | 1ldjB_  | 165 |
| YDL009C   | YDL009C   | 1 | unassigned     | na      | 107 |
| YDL010W   | YDL010W   | 1 | psiblast       | 1h4oA_  | 105 |
| YDL010W   | YDL010W   | 2 | psiblast       | 1kte__  | 126 |
| YDL011C   | YDL011C   | 1 | unassigned     | na      | 107 |
| YDL012C   | YDL012C   | 1 | unassigned     | na      | 107 |
| YDL013W   | HEX3      | 1 | unassigned     | na      | 619 |
| YDL014W   | NOP1      | 1 | fold_recogniti | 1la5A   | 83  |
| YDL014W   | NOP1      | 2 | psiblast       | 1fbnA_  | 244 |
| YDL015C   | TSC13     | 1 | msa            | na      | 116 |
| YDL015C   | TSC13     | 2 | pfam           | PF02544 | 194 |
| YDL016C   | YDL016C   | 1 | unassigned     | na      | 100 |
| YDL017W   | CDC7      | 1 | psiblast       | 1aq1__  | 122 |
| YDL017W   | CDC7      | 2 | psiblast       | 1aq1__  | 78  |
| YDL017W   | CDC7      | 3 | psiblast       | 1aq1__  | 52  |
| YDL017W   | CDC7      | 4 | psiblast       | 1aq1__  | 52  |
| YDL017W   | CDC7      | 5 | msa            | na      | 118 |
| YDL017W   | CDC7      | 6 | unassigned     | na      | 85  |

|         |         |   |                |         |     |
|---------|---------|---|----------------|---------|-----|
| YDL018C | ERP3    | 1 | pfam           | PF01105 | 225 |
| YDL019C | OSH2    | 1 | psiblast       | 1k1aA_  | 135 |
| YDL019C | OSH2    | 2 | psiblast       | 1k1aA_  | 138 |
| YDL019C | OSH2    | 3 | fold_recogniti | 1faoA   | 128 |
| YDL019C | OSH2    | 4 | unassigned     | na      | 141 |
| YDL019C | OSH2    | 5 | psiblast       | 1i84S_  | 346 |
| YDL019C | OSH2    | 6 | msa            | na      | 395 |
| YDL020C | RPN4    | 1 | msa            | na      | 305 |
| YDL020C | RPN4    | 2 | psiblast       | 1meyG_  | 72  |
| YDL020C | RPN4    | 3 | psiblast       | 1tf3A_  | 69  |
| YDL020C | RPN4    | 4 | psiblast       | 1a1iA_  | 85  |
| YDL021W | GPM2    | 1 | psiblast       | 1bq3D_  | 311 |
| YDL022W | GPD1    | 1 | psiblast       | 1evyA_  | 254 |
| YDL022W | GPD1    | 2 | psiblast       | 1evyA_  | 137 |
| YDL023C | SRF4    | 1 | unassigned     | na      | 106 |
| YDL024C | DIA3    | 1 | psiblast       | 1qfxA_  | 169 |
| YDL024C | DIA3    | 2 | psiblast       | 1qfxA_  | 299 |
| YDL025C | YDL025C | 1 | unassigned     | na      | 88  |
| YDL025C | YDL025C | 2 | psiblast       | 1f3mA_  | 80  |
| YDL025C | YDL025C | 3 | unassigned     | na      | 106 |
| YDL025C | YDL025C | 4 | psiblast       | 1ia8A_  | 97  |
| YDL025C | YDL025C | 5 | psiblast       | 1ia8A_  | 79  |
| YDL025C | YDL025C | 6 | psiblast       | 1ia8A_  | 170 |
| YDL026W | YDL026W | 1 | unassigned     | na      | 103 |
| YDL027C | YDL027C | 1 | unassigned     | na      | 204 |
| YDL027C | YDL027C | 2 | msa            | na      | 216 |
| YDL028C | MPS1    | 1 | unassigned     | na      | 189 |
| YDL028C | MPS1    | 2 | psiblast       | 1f3mA_  | 125 |
| YDL028C | MPS1    | 3 | unassigned     | na      | 96  |
| YDL028C | MPS1    | 4 | psiblast       | 1ctpE_  | 98  |
| YDL028C | MPS1    | 5 | psiblast       | 1ctpE_  | 256 |
| YDL029W | ARP2    | 1 | psiblast       | 2btfA_  | 179 |
| YDL029W | ARP2    | 2 | psiblast       | 2btfA_  | 212 |
| YDL030W | PRP9    | 1 | msa            | na      | 212 |
| YDL030W | PRP9    | 2 | unassigned     | na      | 318 |
| YDL031W | DBP10   | 1 | unassigned     | na      | 99  |
| YDL031W | DBP10   | 2 | psiblast       | 1hv8A_  | 248 |
| YDL031W | DBP10   | 3 | psiblast       | 1hv8A_  | 133 |
| YDL031W | DBP10   | 4 | fold_recogniti | 1gkuB   | 97  |
| YDL031W | DBP10   | 5 | unassigned     | na      | 88  |
| YDL031W | DBP10   | 6 | msa            | na      | 234 |
| YDL031W | DBP10   | 7 | unassigned     | na      | 96  |
| YDL032W | YDL032W | 1 | unassigned     | na      | 103 |
| YDL033C | YDL033C | 1 | psiblast       | 1gpmA_  | 283 |
| YDL033C | YDL033C | 2 | msa            | na      | 134 |
| YDL034W | YDL034W | 1 | unassigned     | na      | 114 |
| YDL035C | GPR1    | 1 | unassigned     | na      | 169 |
| YDL035C | GPR1    | 2 | psiblast       | 1epwA_  | 512 |

|           |         |   |                |        |     |
|-----------|---------|---|----------------|--------|-----|
| YDL035C   | GPR1    | 3 | unassigned     | na     | 280 |
| YDL036C   | YDL036C | 1 | psiblast       | 1fjgD_ | 127 |
| YDL036C   | YDL036C | 2 | psiblast       | 1kskA_ | 66  |
| YDL036C   | YDL036C | 3 | psiblast       | 1kskA_ | 187 |
| YDL036C   | YDL036C | 4 | msa            | na     | 82  |
| YDL037C   | BSC1    | 1 | unassigned     | na     | 72  |
| YDL037C   | BSC1    | 2 | fold_recogniti | 1m2vB  | 256 |
| YDL038C   | YDL038C | 1 | fold_recogniti | 1m2vB  | 278 |
| YDL038C   | YDL038C | 2 | msa            | na     | 71  |
| YDL038C   | YDL038C | 3 | fold_recogniti | 1deqA  | 234 |
| YDL039C   | PRM7    | 1 | unassigned     | na     | 115 |
| YDL040C   | NAT1    | 1 | psiblast       | 1fchA_ | 173 |
| YDL040C   | NAT1    | 2 | psiblast       | 1fchA_ | 82  |
| YDL040C   | NAT1    | 3 | psiblast       | 1fchA_ | 87  |
| YDL040C   | NAT1    | 4 | msa            | na     | 171 |
| YDL040C   | NAT1    | 5 | unassigned     | na     | 66  |
| YDL040C   | NAT1    | 6 | msa            | na     | 275 |
| YDL041W   | YDL041W | 1 | unassigned     | na     | 117 |
| YDL042C   | SIR2    | 1 | unassigned     | na     | 191 |
| YDL042C   | SIR2    | 2 | psiblast       | 1j8fA_ | 245 |
| YDL042C   | SIR2    | 3 | psiblast       | 1j8fA_ | 126 |
| YDL043C   | PRP11   | 1 | unassigned     | na     | 121 |
| YDL043C   | PRP11   | 2 | msa            | na     | 145 |
| YDL044C   | MTF2    | 1 | unassigned     | na     | 440 |
| YDL045C   | FAD1    | 1 | psiblast       | 1sur__ | 229 |
| YDL045C   | FAD1    | 2 | unassigned     | na     | 77  |
| YDL045W-A | MRP10   | 1 | unassigned     | na     | 95  |
| YDL046W   | NPC2    | 1 | unassigned     | na     | 173 |
| YDL047W   | SIT4    | 1 | psiblast       | 1fjmA_ | 311 |
| YDL048C   | STP4    | 1 | msa            | na     | 125 |
| YDL048C   | STP4    | 2 | msa            | na     | 112 |
| YDL048C   | STP4    | 3 | psiblast       | 1meyC_ | 114 |
| YDL048C   | STP4    | 4 | psiblast       | 1a1fA_ | 139 |
| YDL049C   | KNH1    | 1 | unassigned     | na     | 268 |
| YDL050C   | YDL050C | 1 | unassigned     | na     | 123 |
| YDL051W   | LHP1    | 1 | psiblast       | 1cvjA_ | 107 |
| YDL051W   | LHP1    | 2 | psiblast       | 1cvjA_ | 168 |
| YDL052C   | SLC1    | 1 | psiblast       | 1k30A_ | 217 |
| YDL052C   | SLC1    | 2 | unassigned     | na     | 86  |
| YDL053C   | PBP4    | 1 | unassigned     | na     | 185 |
| YDL054C   | MCH1    | 1 | psiblast       | 1ja5A_ | 442 |
| YDL054C   | MCH1    | 2 | psiblast       | 1ja5A_ | 44  |
| YDL055C   | PSA1    | 1 | psiblast       | 1h5rB_ | 276 |
| YDL055C   | PSA1    | 2 | psiblast       | 1qq0A_ | 85  |
| YDL056W   | MBP1    | 1 | psiblast       | 1mb1__ | 131 |
| YDL056W   | MBP1    | 2 | msa            | na     | 174 |
| YDL056W   | MBP1    | 3 | psiblast       | 1bu9A_ | 80  |
| YDL056W   | MBP1    | 4 | psiblast       | 1sw6A_ | 170 |



|         |         |    |                |         |     |
|---------|---------|----|----------------|---------|-----|
| YDL056W | MBP1    | 5  | psiblast       | 1dcqA_  | 65  |
| YDL056W | MBP1    | 6  | msa            | na      | 213 |
| YDL057W | YDL057W | 1  | psiblast       | 1a8s__  | 328 |
| YDL058W | USO1    | 1  | fold_recogniti | 1jpwA   | 186 |
| YDL058W | USO1    | 2  | fold_recogniti | 1jpwA   | 102 |
| YDL058W | USO1    | 3  | fold_recogniti | 1jpwA   | 84  |
| YDL058W | USO1    | 4  | psiblast       | 1i84S_  | 256 |
| YDL058W | USO1    | 5  | psiblast       | 1i84S_  | 385 |
| YDL058W | USO1    | 6  | psiblast       | 2tmaA_  | 111 |
| YDL058W | USO1    | 7  | psiblast       | 2tmaA_  | 83  |
| YDL058W | USO1    | 8  | psiblast       | 2tmaA_  | 62  |
| YDL058W | USO1    | 9  | psiblast       | 2tmaA_  | 80  |
| YDL058W | USO1    | 10 | fold_recogniti | 1i84S   | 125 |
| YDL058W | USO1    | 11 | fold_recogniti | 1i84S   | 316 |
| YDL059C | RAD59   | 1  | msa            | na      | 173 |
| YDL059C | RAD59   | 2  | unassigned     | na      | 65  |
| YDL060W | TSR1    | 1  | unassigned     | na      | 79  |
| YDL060W | TSR1    | 2  | fold_recogniti | 1d2eA   | 231 |
| YDL060W | TSR1    | 3  | msa            | na      | 201 |
| YDL060W | TSR1    | 4  | msa            | na      | 277 |
| YDL061C | RPS29B  | 1  | pfam           | PF00253 | 56  |
| YDL062W | YDL062W | 1  | unassigned     | na      | 141 |
| YDL063C | YDL063C | 1  | fold_recogniti | 1qgkA   | 203 |
| YDL063C | YDL063C | 2  | fold_recogniti | 1qgkA   | 109 |
| YDL063C | YDL063C | 3  | fold_recogniti | 1qgkA   | 308 |
| YDL064W | UBC9    | 1  | psiblast       | 1a3s__  | 157 |
| YDL065C | PEX19   | 1  | msa            | na      | 209 |
| YDL065C | PEX19   | 2  | unassigned     | na      | 141 |
| YDL066W | IDP1    | 1  | psiblast       | 1a05A_  | 428 |
| YDL067C | COX9    | 1  | unassigned     | na      | 59  |
| YDL068W | YDL068W | 1  | unassigned     | na      | 109 |
| YDL069C | CBS1    | 1  | unassigned     | na      | 233 |
| YDL070W | BDF2    | 1  | unassigned     | na      | 121 |
| YDL070W | BDF2    | 2  | pfam           | PF00439 | 121 |
| YDL070W | BDF2    | 3  | unassigned     | na      | 73  |
| YDL070W | BDF2    | 4  | psiblast       | 1e6iA_  | 130 |
| YDL070W | BDF2    | 5  | unassigned     | na      | 57  |
| YDL070W | BDF2    | 6  | msa            | na      | 136 |
| YDL071C | YDL071C | 1  | unassigned     | na      | 124 |
| YDL072C | YET3    | 1  | msa            | na      | 203 |
| YDL073W | YDL073W | 1  | unassigned     | na      | 984 |
| YDL074C | BRE1    | 1  | psiblast       | 1i84S_  | 342 |
| YDL074C | BRE1    | 2  | unassigned     | na      | 58  |
| YDL074C | BRE1    | 3  | psiblast       | 1c1gA_  | 70  |
| YDL074C | BRE1    | 4  | psiblast       | 1c1gA_  | 230 |
| YDL075W | RPL31A  | 1  | psiblast       | 1k5yW_  | 113 |
| YDL076C | RXT3    | 1  | unassigned     | na      | 294 |
| YDL077C | VAM6    | 1  | unassigned     | na      | 420 |

|           |           |   |                |         |     |
|-----------|-----------|---|----------------|---------|-----|
| YDL077C   | VAM6      | 2 | msa            | na      | 124 |
| YDL077C   | VAM6      | 3 | psiblast       | 1b89A_  | 315 |
| YDL077C   | VAM6      | 4 | msa            | na      | 115 |
| YDL077C   | VAM6      | 5 | msa            | na      | 75  |
| YDL078C   | MDH3      | 1 | psiblast       | 1mldA_  | 343 |
| YDL079C   | MRK1      | 1 | unassigned     | na      | 90  |
| YDL079C   | MRK1      | 2 | psiblast       | 1i09A_  | 151 |
| YDL079C   | MRK1      | 3 | psiblast       | 1i09A_  | 260 |
| YDL080C   | THI3      | 1 | psiblast       | 1qpbA_  | 199 |
| YDL080C   | THI3      | 2 | psiblast       | 1qpbA_  | 165 |
| YDL080C   | THI3      | 3 | psiblast       | 1qpbA_  | 245 |
| YDL081C   | RPP1A     | 1 | pfam           | PF00428 | 106 |
| YDL082W   | RPL13A    | 1 | pfam           | PF01294 | 199 |
| YDL083C   | RPS16B    | 1 | psiblast       | 1k5xI_  | 143 |
| YDL084W   | SUB2      | 1 | psiblast       | 1fuuA_  | 446 |
| YDL085C-A | YDL085C-A | 1 | unassigned     | na      | 68  |
| YDL085W   | NDE2      | 1 | unassigned     | na      | 87  |
| YDL085W   | NDE2      | 2 | psiblast       | 1dxIA_  | 201 |
| YDL085W   | NDE2      | 3 | psiblast       | 1dxIA_  | 257 |
| YDL086W   | YDL086W   | 1 | psiblast       | 1qfsA_  | 273 |
| YDL087C   | LUC7      | 1 | pfam           | PF03194 | 261 |
| YDL088C   | ASM4      | 1 | msa            | na      | 226 |
| YDL088C   | ASM4      | 2 | msa            | na      | 199 |
| YDL088C   | ASM4      | 3 | unassigned     | na      | 103 |
| YDL089W   | YDL089W   | 1 | unassigned     | na      | 484 |
| YDL090C   | RAM1      | 1 | msa            | na      | 342 |
| YDL090C   | RAM1      | 2 | unassigned     | na      | 89  |
| YDL091C   | UBX3      | 1 | unassigned     | na      | 124 |
| YDL091C   | UBX3      | 2 | msa            | na      | 164 |
| YDL091C   | UBX3      | 3 | unassigned     | na      | 68  |
| YDL091C   | UBX3      | 4 | psiblast       | 1h8cA_  | 99  |
| YDL092W   | SRP14     | 1 | fold_recogniti | 1e8oB   | 146 |
| YDL093W   | PMT5      | 1 | pfam           | PF02366 | 317 |
| YDL093W   | PMT5      | 2 | pfam           | PF02815 | 61  |
| YDL093W   | PMT5      | 3 | pfam           | PF02815 | 74  |
| YDL093W   | PMT5      | 4 | pfam           | PF02815 | 73  |
| YDL093W   | PMT5      | 5 | msa            | na      | 218 |
| YDL094C   | YDL094C   | 1 | unassigned     | na      | 169 |
| YDL095W   | PMT1      | 1 | pfam           | PF02366 | 319 |
| YDL095W   | PMT1      | 2 | pfam           | PF02815 | 65  |
| YDL095W   | PMT1      | 3 | pfam           | PF02815 | 73  |
| YDL095W   | PMT1      | 4 | pfam           | PF02815 | 90  |
| YDL095W   | PMT1      | 5 | unassigned     | na      | 55  |
| YDL095W   | PMT1      | 6 | msa            | na      | 141 |
| YDL095W   | PMT1      | 7 | unassigned     | na      | 74  |
| YDL096C   | YDL096C   | 1 | unassigned     | na      | 108 |
| YDL097C   | RPN6      | 1 | fold_recogniti | 1hz4A   | 141 |
| YDL097C   | RPN6      | 2 | fold_recogniti | 1hz4A   | 122 |

|           |           |   |                |        |      |
|-----------|-----------|---|----------------|--------|------|
| YDL097C   | RPN6      | 3 | fold_recogniti | 1hz4A  | 171  |
| YDL098C   | SNU23     | 1 | unassigned     | na     | 194  |
| YDL099W   | YDL099W   | 1 | psiblast       | 1i84S_ | 99   |
| YDL099W   | YDL099W   | 2 | psiblast       | 1dg3A_ | 242  |
| YDL100C   | ARR4      | 1 | psiblast       | 1f48A_ | 354  |
| YDL101C   | DUN1      | 1 | psiblast       | 1gxcA_ | 152  |
| YDL101C   | DUN1      | 2 | psiblast       | 1a06__ | 148  |
| YDL101C   | DUN1      | 3 | psiblast       | 1a06__ | 213  |
| YDL102W   | CDC2      | 1 | unassigned     | na     | 75   |
| YDL102W   | CDC2      | 2 | psiblast       | 1tgoA_ | 410  |
| YDL102W   | CDC2      | 3 | psiblast       | 1tgoA_ | 225  |
| YDL102W   | CDC2      | 4 | psiblast       | 1tgoA_ | 123  |
| YDL102W   | CDC2      | 5 | psiblast       | 1tgoA_ | 174  |
| YDL102W   | CDC2      | 6 | unassigned     | na     | 90   |
| YDL103C   | QRI1      | 1 | unassigned     | na     | 80   |
| YDL103C   | QRI1      | 2 | fold_recogniti | 1hm0A  | 283  |
| YDL103C   | QRI1      | 3 | msa            | na     | 114  |
| YDL104C   | QRI7      | 1 | unassigned     | na     | 75   |
| YDL104C   | QRI7      | 2 | fold_recogniti | 1jceA  | 332  |
| YDL105W   | QRI2      | 1 | msa            | na     | 122  |
| YDL105W   | QRI2      | 2 | msa            | na     | 280  |
| YDL106C   | PHO2      | 1 | psiblast       | 1fjIA_ | 138  |
| YDL106C   | PHO2      | 2 | fold_recogniti | 1ruxA  | 169  |
| YDL106C   | PHO2      | 3 | fold_recogniti | 1ruxA  | 252  |
| YDL107W   | MSS2      | 1 | unassigned     | na     | 351  |
| YDL108W   | KIN28     | 1 | psiblast       | 1lg3A_ | 85   |
| YDL108W   | KIN28     | 2 | psiblast       | 1lg3A_ | 221  |
| YDL109C   | YDL109C   | 1 | unassigned     | na     | 154  |
| YDL109C   | YDL109C   | 2 | psiblast       | 1hqda_ | 163  |
| YDL109C   | YDL109C   | 3 | msa            | na     | 164  |
| YDL109C   | YDL109C   | 4 | unassigned     | na     | 166  |
| YDL110C   | YDL110C   | 1 | unassigned     | na     | 150  |
| YDL111C   | RRP42     | 1 | psiblast       | 1e3pA_ | 119  |
| YDL111C   | RRP42     | 2 | psiblast       | 1e3pA_ | 146  |
| YDL112W   | TRM3      | 1 | unassigned     | na     | 1178 |
| YDL112W   | TRM3      | 2 | psiblast       | 1ipaA_ | 99   |
| YDL112W   | TRM3      | 3 | psiblast       | 1ipaA_ | 159  |
| YDL113C   | ATG20     | 1 | msa            | na     | 157  |
| YDL113C   | ATG20     | 2 | psiblast       | 1i84S_ | 361  |
| YDL113C   | ATG20     | 3 | msa            | na     | 122  |
| YDL114W   | YDL114W   | 1 | psiblast       | 1i01A_ | 308  |
| YDL114W-A | YDL114W-A | 1 | unassigned     | na     | 37   |
| YDL115C   | IWR1      | 1 | unassigned     | na     | 240  |
| YDL116W   | NUP84     | 1 | unassigned     | na     | 56   |
| YDL116W   | NUP84     | 2 | msa            | na     | 445  |
| YDL116W   | NUP84     | 3 | unassigned     | na     | 225  |
| YDL117W   | CYK3      | 1 | psiblast       | 1k9aA_ | 90   |
| YDL117W   | CYK3      | 2 | msa            | na     | 369  |

|           |         |   |                |         |     |
|-----------|---------|---|----------------|---------|-----|
| YDL117W   | CYK3    | 3 | fold_recogniti | 1e2tA   | 162 |
| YDL117W   | CYK3    | 4 | unassigned     | na      | 264 |
| YDL118W   | YDL118W | 1 | unassigned     | na      | 126 |
| YDL119C   | YDL119C | 1 | pfam           | PF00153 | 105 |
| YDL119C   | YDL119C | 2 | pfam           | PF00153 | 108 |
| YDL119C   | YDL119C | 3 | pfam           | PF00153 | 94  |
| YDL120W   | YFH1    | 1 | psiblast       | 1ekgA_  | 174 |
| YDL121C   | YDL121C | 1 | unassigned     | na      | 149 |
| YDL122W   | UBP1    | 1 | unassigned     | na      | 81  |
| YDL122W   | UBP1    | 2 | pfam           | PF00442 | 66  |
| YDL122W   | UBP1    | 3 | msa            | na      | 372 |
| YDL122W   | UBP1    | 4 | msa            | na      | 154 |
| YDL122W   | UBP1    | 5 | pfam           | PF00443 | 69  |
| YDL122W   | UBP1    | 6 | unassigned     | na      | 67  |
| YDL123W   | SNA4    | 1 | pfam           | PF01679 | 80  |
| YDL123W   | SNA4    | 2 | unassigned     | na      | 60  |
| YDL124W   | YDL124W | 1 | psiblast       | 2alr__  | 312 |
| YDL125C   | HNT1    | 1 | psiblast       | 1av5A_  | 158 |
| YDL126C   | CDC48   | 1 | psiblast       | 1e32A_  | 117 |
| YDL126C   | CDC48   | 2 | psiblast       | 1e32A_  | 93  |
| YDL126C   | CDC48   | 3 | psiblast       | 1e32A_  | 171 |
| YDL126C   | CDC48   | 4 | psiblast       | 1e32A_  | 78  |
| YDL126C   | CDC48   | 5 | psiblast       | 1d2nA_  | 182 |
| YDL126C   | CDC48   | 6 | fold_recogniti | 1d2nA   | 84  |
| YDL126C   | CDC48   | 7 | msa            | na      | 110 |
| YDL127W   | PCL2    | 1 | psiblast       | 1vin__  | 155 |
| YDL127W   | PCL2    | 2 | psiblast       | 1vin__  | 124 |
| YDL128W   | VCX1    | 1 | msa            | na      | 238 |
| YDL128W   | VCX1    | 2 | pfam           | PF01699 | 173 |
| YDL129W   | YDL129W | 1 | unassigned     | na      | 291 |
| YDL130W   | RPP1B   | 1 | pfam           | PF00428 | 106 |
| YDL130W-A | STF1    | 1 | unassigned     | na      | 86  |
| YDL131W   | LYS21   | 1 | fold_recogniti | 1euaA   | 328 |
| YDL131W   | LYS21   | 2 | unassigned     | na      | 112 |
| YDL132W   | CDC53   | 1 | psiblast       | 1ldjA_  | 129 |
| YDL132W   | CDC53   | 2 | psiblast       | 1ldjA_  | 182 |
| YDL132W   | CDC53   | 3 | psiblast       | 1ldjA_  | 215 |
| YDL132W   | CDC53   | 4 | psiblast       | 1ldjA_  | 76  |
| YDL132W   | CDC53   | 5 | psiblast       | 1ldjA_  | 140 |
| YDL132W   | CDC53   | 6 | psiblast       | 1ldjA_  | 73  |
| YDL133C-A | RPL41B  | 1 | unassigned     | na      | 25  |
| YDL133W   | YDL133W | 1 | unassigned     | na      | 142 |
| YDL133W   | YDL133W | 2 | msa            | na      | 295 |
| YDL134C   | PPH21   | 1 | psiblast       | 1it6A_  | 369 |
| YDL135C   | RDI1    | 1 | psiblast       | 1doaB_  | 202 |
| YDL136W   | RPL35B  | 1 | psiblast       | 1k5yY_  | 120 |
| YDL137W   | ARF2    | 1 | psiblast       | 1rrf__  | 181 |
| YDL138W   | RGT2    | 1 | unassigned     | na      | 72  |

|         |         |   |                |         |      |
|---------|---------|---|----------------|---------|------|
| YDL138W | RGT2    | 2 | psiblast       | 1ja5A_  | 428  |
| YDL138W | RGT2    | 3 | psiblast       | 1ja5A_  | 119  |
| YDL138W | RGT2    | 4 | unassigned     | na      | 144  |
| YDL139C | SCM3    | 1 | unassigned     | na      | 247  |
| YDL140C | RPO21   | 1 | psiblast       | 1k83A_  | 1555 |
| YDL140C | RPO21   | 2 | fold_recogniti | 1m2vB   | 178  |
| YDL141W | BPL1    | 1 | msa            | na      | 263  |
| YDL141W | BPL1    | 2 | unassigned     | na      | 85   |
| YDL141W | BPL1    | 3 | psiblast       | 1bia__  | 274  |
| YDL141W | BPL1    | 4 | psiblast       | 1bia__  | 68   |
| YDL142C | CRD1    | 1 | unassigned     | na      | 58   |
| YDL142C | CRD1    | 2 | pfam           | PF01066 | 225  |
| YDL143W | CCT4    | 1 | psiblast       | 1a6dA_  | 413  |
| YDL143W | CCT4    | 2 | psiblast       | 1a6dA_  | 115  |
| YDL144C | YDL144C | 1 | psiblast       | 1ks9A_  | 214  |
| YDL144C | YDL144C | 2 | psiblast       | 1ks9A_  | 145  |
| YDL145C | COP1    | 1 | psiblast       | 1erjA_  | 324  |
| YDL145C | COP1    | 2 | psiblast       | 1gxrA_  | 119  |
| YDL145C | COP1    | 3 | msa            | na      | 203  |
| YDL145C | COP1    | 4 | fold_recogniti | 1b89A   | 146  |
| YDL145C | COP1    | 5 | unassigned     | na      | 188  |
| YDL145C | COP1    | 6 | fold_recogniti | 1elrA   | 108  |
| YDL145C | COP1    | 7 | fold_recogniti | 1elrA   | 52   |
| YDL145C | COP1    | 8 | unassigned     | na      | 61   |
| YDL146W | YDL146W | 1 | unassigned     | na      | 164  |
| YDL146W | YDL146W | 2 | msa            | na      | 251  |
| YDL146W | YDL146W | 3 | unassigned     | na      | 76   |
| YDL147W | RPN5    | 1 | fold_recogniti | 1hz4A   | 101  |
| YDL147W | RPN5    | 2 | fold_recogniti | 1hz4A   | 121  |
| YDL147W | RPN5    | 3 | fold_recogniti | 1hz4A   | 148  |
| YDL147W | RPN5    | 4 | msa            | na      | 75   |
| YDL148C | NOP14   | 1 | msa            | na      | 415  |
| YDL148C | NOP14   | 2 | unassigned     | na      | 395  |
| YDL149W | ATG9    | 1 | unassigned     | na      | 229  |
| YDL149W | ATG9    | 2 | msa            | na      | 627  |
| YDL149W | ATG9    | 3 | unassigned     | na      | 141  |
| YDL150W | RPC53   | 1 | unassigned     | na      | 232  |
| YDL150W | RPC53   | 2 | msa            | na      | 190  |
| YDL151C | BUD30   | 1 | unassigned     | na      | 193  |
| YDL152W | YDL152W | 1 | unassigned     | na      | 121  |
| YDL153C | SAS10   | 1 | psiblast       | 1i84S_  | 329  |
| YDL153C | SAS10   | 2 | msa            | na      | 281  |
| YDL154W | MSH5    | 1 | psiblast       | 1e3mA_  | 244  |
| YDL154W | MSH5    | 2 | psiblast       | 1e3mA_  | 351  |
| YDL154W | MSH5    | 3 | psiblast       | 1e3mA_  | 214  |
| YDL154W | MSH5    | 4 | psiblast       | 1e3mA_  | 92   |
| YDL155W | CLB3    | 1 | msa            | na      | 162  |
| YDL155W | CLB3    | 2 | psiblast       | 1vin__  | 143  |

|           |           |   |                |        |     |
|-----------|-----------|---|----------------|--------|-----|
| YDL155W   | CLB3      | 3 | psiblast       | 1vin__ | 122 |
| YDL156W   | YDL156W   | 1 | unassigned     | na     | 93  |
| YDL156W   | YDL156W   | 2 | psiblast       | 1erjA_ | 429 |
| YDL157C   | YDL157C   | 1 | unassigned     | na     | 118 |
| YDL158C   | YDL158C   | 1 | unassigned     | na     | 102 |
| YDL159W   | STE7      | 1 | unassigned     | na     | 131 |
| YDL159W   | STE7      | 2 | psiblast       | 1f3mC_ | 142 |
| YDL159W   | STE7      | 3 | psiblast       | 1f3mC_ | 242 |
| YDL159W-A | YDL159W-A | 1 | unassigned     | na     | 43  |
| YDL160C   | DHH1      | 1 | psiblast       | 1fuuA_ | 417 |
| YDL160C   | DHH1      | 2 | psiblast       | 1d9xA_ | 89  |
| YDL161W   | ENT1      | 1 | psiblast       | 1inzA_ | 155 |
| YDL161W   | ENT1      | 2 | msa            | na     | 299 |
| YDL162C   | YDL162C   | 1 | unassigned     | na     | 118 |
| YDL163W   | YDL163W   | 1 | unassigned     | na     | 100 |
| YDL164C   | CDC9      | 1 | fold_recogniti | 1ldvA  | 143 |
| YDL164C   | CDC9      | 2 | fold_recogniti | 1lshA  | 187 |
| YDL164C   | CDC9      | 3 | unassigned     | na     | 61  |
| YDL164C   | CDC9      | 4 | psiblast       | 1a0i__ | 80  |
| YDL164C   | CDC9      | 5 | psiblast       | 1a0i__ | 284 |
| YDL165W   | CDC36     | 1 | unassigned     | na     | 191 |
| YDL166C   | FAP7      | 1 | psiblast       | 2ak3A_ | 197 |
| YDL167C   | NRP1      | 1 | unassigned     | na     | 173 |
| YDL167C   | NRP1      | 2 | psiblast       | 1fxIA_ | 144 |
| YDL167C   | NRP1      | 3 | msa            | na     | 146 |
| YDL167C   | NRP1      | 4 | msa            | na     | 119 |
| YDL167C   | NRP1      | 5 | unassigned     | na     | 137 |
| YDL168W   | SFA1      | 1 | psiblast       | 1tehA_ | 238 |
| YDL168W   | SFA1      | 2 | psiblast       | 1tehA_ | 148 |
| YDL169C   | UGX2      | 1 | unassigned     | na     | 223 |
| YDL170W   | UGA3      | 1 | psiblast       | 1pyiA_ | 58  |
| YDL170W   | UGA3      | 2 | unassigned     | na     | 394 |
| YDL170W   | UGA3      | 3 | msa            | na     | 76  |
| YDL171C   | GLT1      | 1 | psiblast       | 1llwA_ | 499 |
| YDL171C   | GLT1      | 2 | psiblast       | 1llwA_ | 357 |
| YDL171C   | GLT1      | 3 | psiblast       | 1llwA_ | 436 |
| YDL171C   | GLT1      | 4 | psiblast       | 1llwA_ | 316 |
| YDL171C   | GLT1      | 5 | psiblast       | 1gt8A_ | 537 |
| YDL172C   | YDL172C   | 1 | unassigned     | na     | 159 |
| YDL173W   | YDL173W   | 1 | unassigned     | na     | 295 |
| YDL174C   | DLD1      | 1 | unassigned     | na     | 100 |
| YDL174C   | DLD1      | 2 | psiblast       | 1diiA_ | 280 |
| YDL174C   | DLD1      | 3 | psiblast       | 1diiA_ | 207 |
| YDL175C   | AIR2      | 1 | psiblast       | 1baj__ | 66  |
| YDL175C   | AIR2      | 2 | psiblast       | 1aaf__ | 54  |
| YDL175C   | AIR2      | 3 | unassigned     | na     | 52  |
| YDL175C   | AIR2      | 4 | msa            | na     | 106 |
| YDL175C   | AIR2      | 5 | unassigned     | na     | 66  |

|           |           |   |                |         |     |
|-----------|-----------|---|----------------|---------|-----|
| YDL176W   | YDL176W   | 1 | unassigned     | na      | 708 |
| YDL177C   | YDL177C   | 1 | pfam           | PF01205 | 170 |
| YDL178W   | DLD2      | 1 | psiblast       | 1diiA_  | 318 |
| YDL178W   | DLD2      | 2 | psiblast       | 1diiA_  | 212 |
| YDL179W   | PCL9      | 1 | psiblast       | 1vin__  | 181 |
| YDL179W   | PCL9      | 2 | psiblast       | 1vin__  | 123 |
| YDL180W   | YDL180W   | 1 | unassigned     | na      | 547 |
| YDL181W   | INH1      | 1 | unassigned     | na      | 85  |
| YDL182W   | LYS20     | 1 | fold_recogniti | 1euaA   | 261 |
| YDL182W   | LYS20     | 2 | unassigned     | na      | 167 |
| YDL183C   | YDL183C   | 1 | msa            | na      | 263 |
| YDL183C   | YDL183C   | 2 | unassigned     | na      | 57  |
| YDL184W-B | 1025      | 1 | fold_recogniti | 1bmfA   | 79  |
| YDL184W-B | 1025      | 2 | psiblast       | 1skyE_  | 94  |
| YDL184W-B | 1025      | 3 | psiblast       | 1skyE_  | 268 |
| YDL184W-B | 1025      | 4 | psiblast       | 1skyE_  | 176 |
| YDL185C-A | YDL185C-A | 1 | unassigned     | na      | 75  |
| YDL186W   | YDL186W   | 1 | unassigned     | na      | 277 |
| YDL187C   | YDL187C   | 1 | unassigned     | na      | 109 |
| YDL188C   | PPH22     | 1 | psiblast       | 1it6A_  | 377 |
| YDL189W   | RBS1      | 1 | pfam           | PF01424 | 120 |
| YDL189W   | RBS1      | 2 | unassigned     | na      | 105 |
| YDL189W   | RBS1      | 3 | fold_recogniti | 1i3qA   | 263 |
| YDL190C   | UFD2      | 1 | msa            | na      | 196 |
| YDL190C   | UFD2      | 2 | unassigned     | na      | 473 |
| YDL190C   | UFD2      | 3 | psiblast       | 1i84S_  | 217 |
| YDL190C   | UFD2      | 4 | psiblast       | 1jm7B_  | 75  |
| YDL192W   | ARF1      | 1 | psiblast       | 1rrf__  | 181 |
| YDL193W   | YDL193W   | 1 | unassigned     | na      | 78  |
| YDL193W   | YDL193W   | 2 | psiblast       | 1f75A_  | 297 |
| YDL194W   | SNF3      | 1 | unassigned     | na      | 86  |
| YDL194W   | SNF3      | 2 | psiblast       | 1ja5A_  | 411 |
| YDL194W   | SNF3      | 3 | psiblast       | 1ja5A_  | 120 |
| YDL194W   | SNF3      | 4 | unassigned     | na      | 267 |
| YDL195W   | SEC31     | 1 | psiblast       | 1gg2B_  | 373 |
| YDL195W   | SEC31     | 2 | msa            | na      | 133 |
| YDL195W   | SEC31     | 3 | msa            | na      | 187 |
| YDL195W   | SEC31     | 4 | msa            | na      | 209 |
| YDL195W   | SEC31     | 5 | fold_recogniti | 1deqA   | 99  |
| YDL195W   | SEC31     | 6 | fold_recogniti | 1ei3A   | 272 |
| YDL196W   | YDL196W   | 1 | fold_recogniti | 1oczP   | 109 |
| YDL197C   | ASF2      | 1 | psiblast       | 1i84S_  | 366 |
| YDL197C   | ASF2      | 2 | msa            | na      | 159 |
| YDL198C   | GGC1      | 1 | fold_recogniti | 1is2A   | 300 |
| YDL199C   | YDL199C   | 1 | unassigned     | na      | 85  |
| YDL199C   | YDL199C   | 2 | psiblast       | 1ja5A_  | 428 |
| YDL199C   | YDL199C   | 3 | psiblast       | 1ja5A_  | 110 |
| YDL199C   | YDL199C   | 4 | unassigned     | na      | 64  |

|         |         |   |                |         |     |
|---------|---------|---|----------------|---------|-----|
| YDL200C | MGT1    | 1 | psiblast       | 1sfe__  | 114 |
| YDL200C | MGT1    | 2 | psiblast       | 1sfe__  | 92  |
| YDL201W | TRM8    | 1 | unassigned     | na      | 72  |
| YDL201W | TRM8    | 2 | psiblast       | 1j4fA_  | 214 |
| YDL202W | MRPL11  | 1 | psiblast       | 1jj2G_  | 249 |
| YDL203C | YDL203C | 1 | msa            | na      | 145 |
| YDL203C | YDL203C | 2 | psiblast       | 1fchA_  | 216 |
| YDL203C | YDL203C | 3 | psiblast       | 1fchA_  | 120 |
| YDL203C | YDL203C | 4 | psiblast       | 1ihgA_  | 142 |
| YDL204W | RTN2    | 1 | pfam           | PF02453 | 249 |
| YDL204W | RTN2    | 2 | unassigned     | na      | 144 |
| YDL205C | HEM3    | 1 | psiblast       | 1pda__  | 127 |
| YDL205C | HEM3    | 2 | psiblast       | 1pda__  | 200 |
| YDL206W | YDL206W | 1 | pfam           | PF01699 | 225 |
| YDL206W | YDL206W | 2 | msa            | na      | 112 |
| YDL206W | YDL206W | 3 | unassigned     | na      | 246 |
| YDL206W | YDL206W | 4 | pfam           | PF01699 | 179 |
| YDL207W | GLE1    | 1 | psiblast       | 1i84S_  | 317 |
| YDL207W | GLE1    | 2 | unassigned     | na      | 221 |
| YDL208W | NHP2    | 1 | psiblast       | 1e7kA_  | 173 |
| YDL209C | CWC2    | 1 | psiblast       | 3sxIA_  | 122 |
| YDL209C | CWC2    | 2 | psiblast       | 1ha1__  | 102 |
| YDL209C | CWC2    | 3 | psiblast       | 1ha1__  | 115 |
| YDL210W | UGA4    | 1 | pfam           | PF00324 | 571 |
| YDL211C | YDL211C | 1 | msa            | na      | 278 |
| YDL211C | YDL211C | 2 | unassigned     | na      | 94  |
| YDL212W | SHR3    | 1 | unassigned     | na      | 210 |
| YDL213C | NOP6    | 1 | fold_recogniti | 1fj7A   | 225 |
| YDL214C | PRR2    | 1 | unassigned     | na      | 320 |
| YDL214C | PRR2    | 2 | psiblast       | 1aq1__  | 122 |
| YDL214C | PRR2    | 3 | psiblast       | 1aq1__  | 127 |
| YDL214C | PRR2    | 4 | psiblast       | 1aq1__  | 51  |
| YDL214C | PRR2    | 5 | psiblast       | 1aq1__  | 79  |
| YDL215C | GDH2    | 1 | msa            | na      | 377 |
| YDL215C | GDH2    | 2 | unassigned     | na      | 94  |
| YDL215C | GDH2    | 3 | psiblast       | 1euzA_  | 313 |
| YDL215C | GDH2    | 4 | psiblast       | 1euzA_  | 231 |
| YDL215C | GDH2    | 5 | unassigned     | na      | 77  |
| YDL216C | RRI1    | 1 | unassigned     | na      | 54  |
| YDL216C | RRI1    | 2 | pfam           | PF01398 | 162 |
| YDL216C | RRI1    | 3 | msa            | na      | 152 |
| YDL216C | RRI1    | 4 | unassigned     | na      | 87  |
| YDL217C | TIM22   | 1 | pfam           | PF02466 | 207 |
| YDL218W | YDL218W | 1 | msa            | na      | 205 |
| YDL218W | YDL218W | 2 | unassigned     | na      | 112 |
| YDL219W | DTD1    | 1 | psiblast       | 1jkeA_  | 150 |
| YDL220C | CDC13   | 1 | unassigned     | na      | 490 |
| YDL220C | CDC13   | 2 | psiblast       | 1kxIA_  | 151 |



|         |         |   |                |        |     |
|---------|---------|---|----------------|--------|-----|
| YDL220C | CDC13   | 3 | psiblast       | 1kxIA_ | 103 |
| YDL220C | CDC13   | 4 | unassigned     | na     | 180 |
| YDL221W | YDL221W | 1 | unassigned     | na     | 183 |
| YDL222C | FMP45   | 1 | unassigned     | na     | 309 |
| YDL223C | HBT1    | 1 | msa            | na     | 556 |
| YDL223C | HBT1    | 2 | unassigned     | na     | 490 |
| YDL224C | WHI4    | 1 | unassigned     | na     | 326 |
| YDL224C | WHI4    | 2 | msa            | na     | 121 |
| YDL224C | WHI4    | 3 | unassigned     | na     | 64  |
| YDL224C | WHI4    | 4 | psiblast       | 2u1a__ | 138 |
| YDL225W | SHS1    | 1 | fold_recogniti | 1h65A  | 223 |
| YDL225W | SHS1    | 2 | psiblast       | 1i84S_ | 328 |
| YDL226C | GCS1    | 1 | psiblast       | 1dcqA_ | 201 |
| YDL226C | GCS1    | 2 | unassigned     | na     | 53  |
| YDL226C | GCS1    | 3 | msa            | na     | 98  |
| YDL227C | HO      | 1 | psiblast       | 1ef0A_ | 214 |
| YDL227C | HO      | 2 | psiblast       | 1ef0A_ | 257 |
| YDL227C | HO      | 3 | unassigned     | na     | 115 |
| YDL228C | YDL228C | 1 | msa            | na     | 213 |
| YDL229W | SSB1    | 1 | psiblast       | 1hx1A_ | 196 |
| YDL229W | SSB1    | 2 | psiblast       | 1hx1A_ | 116 |
| YDL229W | SSB1    | 3 | psiblast       | 1hx1A_ | 75  |
| YDL229W | SSB1    | 4 | psiblast       | 1ckrA_ | 160 |
| YDL229W | SSB1    | 5 | psiblast       | 1i84S_ | 66  |
| YDL230W | PTP1    | 1 | psiblast       | 1larA_ | 335 |
| YDL231C | BRE4    | 1 | unassigned     | na     | 103 |
| YDL231C | BRE4    | 2 | msa            | na     | 238 |
| YDL231C | BRE4    | 3 | unassigned     | na     | 784 |
| YDL232W | OST4    | 1 | unassigned     | na     | 36  |
| YDL233W | YDL233W | 1 | fold_recogniti | 1m2vB  | 192 |
| YDL233W | YDL233W | 2 | unassigned     | na     | 266 |
| YDL234C | GYP7    | 1 | msa            | na     | 250 |
| YDL234C | GYP7    | 2 | unassigned     | na     | 102 |
| YDL234C | GYP7    | 3 | psiblast       | 1fkmA_ | 227 |
| YDL234C | GYP7    | 4 | psiblast       | 1fkmA_ | 53  |
| YDL234C | GYP7    | 5 | msa            | na     | 114 |
| YDL235C | YPD1    | 1 | psiblast       | 1c03A_ | 167 |
| YDL236W | PHO13   | 1 | msa            | na     | 80  |
| YDL236W | PHO13   | 2 | psiblast       | 1jud__ | 87  |
| YDL236W | PHO13   | 3 | psiblast       | 1jud__ | 145 |
| YDL237W | YDL237W | 1 | unassigned     | na     | 390 |
| YDL238C | YDL238C | 1 | psiblast       | 1ubpC_ | 68  |
| YDL238C | YDL238C | 2 | psiblast       | 1ubpC_ | 421 |
| YDL239C | ADY3    | 1 | psiblast       | 1i84S_ | 347 |
| YDL239C | ADY3    | 2 | msa            | na     | 151 |
| YDL239C | ADY3    | 3 | psiblast       | 2tmaA_ | 56  |
| YDL239C | ADY3    | 4 | psiblast       | 2tmaA_ | 83  |
| YDL239C | ADY3    | 5 | psiblast       | 2tmaA_ | 62  |

|           |           |   |                |         |     |
|-----------|-----------|---|----------------|---------|-----|
| YDL239C   | ADY3      | 6 | psiblast       | 2tmaA_  | 91  |
| YDL240C-A | YDL240C-A | 1 | unassigned     | na      | 45  |
| YDL240W   | LRG1      | 1 | psiblast       | 1b8tA_  | 93  |
| YDL240W   | LRG1      | 2 | psiblast       | 1b8tA_  | 117 |
| YDL240W   | LRG1      | 3 | msa            | na      | 88  |
| YDL240W   | LRG1      | 4 | unassigned     | na      | 112 |
| YDL240W   | LRG1      | 5 | pfam           | PF00412 | 72  |
| YDL240W   | LRG1      | 6 | msa            | na      | 171 |
| YDL240W   | LRG1      | 7 | psiblast       | 1am4A_  | 168 |
| YDL240W   | LRG1      | 8 | psiblast       | 1am4A_  | 142 |
| YDL240W   | LRG1      | 9 | unassigned     | na      | 54  |
| YDL241W   | YDL241W   | 1 | unassigned     | na      | 123 |
| YDL242W   | YDL242W   | 1 | unassigned     | na      | 117 |
| YDL243C   | AAD4      | 1 | psiblast       | 1gveB_  | 329 |
| YDL244W   | THI13     | 1 | psiblast       | 1gggA_  | 190 |
| YDL244W   | THI13     | 2 | psiblast       | 1gggA_  | 98  |
| YDL244W   | THI13     | 3 | unassigned     | na      | 52  |
| YDL245C   | HXT15     | 1 | psiblast       | 1ja5A_  | 465 |
| YDL245C   | HXT15     | 2 | psiblast       | 1ja5A_  | 102 |
| YDL246C   | SOR2      | 1 | psiblast       | 1e3jA_  | 188 |
| YDL246C   | SOR2      | 2 | psiblast       | 1e3jA_  | 169 |
| YDL247W   | MPH2      | 1 | unassigned     | na      | 68  |
| YDL247W   | MPH2      | 2 | psiblast       | 1ja5A_  | 429 |
| YDL247W   | MPH2      | 3 | psiblast       | 1ja5A_  | 112 |
| YDL247W-A | YDL247W-A | 1 | unassigned     | na      | 24  |
| YDL248W   | COS7      | 1 | msa            | na      | 61  |
| YDL248W   | COS7      | 2 | pfam           | PF00674 | 112 |
| YDL248W   | COS7      | 3 | unassigned     | na      | 71  |
| YDL248W   | COS7      | 4 | pfam           | PF00674 | 139 |
| YDR001C   | NTH1      | 1 | unassigned     | na      | 90  |
| YDR001C   | NTH1      | 2 | pfam           | PF01204 | 661 |
| YDR002W   | YRB1      | 1 | psiblast       | 1rrpB_  | 201 |
| YDR003W   | YDR003W   | 1 | unassigned     | na      | 210 |
| YDR004W   | RAD57     | 1 | psiblast       | 1b22A_  | 61  |
| YDR004W   | RAD57     | 2 | psiblast       | 1rea__  | 298 |
| YDR004W   | RAD57     | 3 | psiblast       | 1rea__  | 101 |
| YDR005C   | MAF1      | 1 | unassigned     | na      | 217 |
| YDR005C   | MAF1      | 2 | msa            | na      | 178 |
| YDR006C   | SOK1      | 1 | unassigned     | na      | 347 |
| YDR006C   | SOK1      | 2 | fold_recogniti | 1ldjA   | 369 |
| YDR006C   | SOK1      | 3 | fold_recogniti | 1ldjA   | 96  |
| YDR006C   | SOK1      | 4 | unassigned     | na      | 89  |
| YDR007W   | TRP1      | 1 | psiblast       | 1dl3A_  | 66  |
| YDR008C   | YDR008C   | 1 | unassigned     | na      | 116 |
| YDR009W   | GAL3      | 1 | psiblast       | 1kkhA_  | 179 |
| YDR009W   | GAL3      | 2 | psiblast       | 1kkhA_  | 193 |
| YDR009W   | GAL3      | 3 | fold_recogniti | 1kvkA   | 148 |
| YDR010C   | YDR010C   | 1 | unassigned     | na      | 110 |

|         |         |   |                |         |     |
|---------|---------|---|----------------|---------|-----|
| YDR011W | SNQ2    | 1 | unassigned     | na      | 150 |
| YDR011W | SNQ2    | 2 | psiblast       | 1l2tA_  | 282 |
| YDR011W | SNQ2    | 3 | unassigned     | na      | 66  |
| YDR011W | SNQ2    | 4 | psiblast       | 1jsqA_  | 315 |
| YDR011W | SNQ2    | 5 | psiblast       | 1jsqA_  | 288 |
| YDR011W | SNQ2    | 6 | msa            | na      | 291 |
| YDR011W | SNQ2    | 7 | unassigned     | na      | 109 |
| YDR012W | RPL4B   | 1 | psiblast       | 1k5yD_  | 244 |
| YDR012W | RPL4B   | 2 | psiblast       | 1k5yD_  | 56  |
| YDR012W | RPL4B   | 3 | msa            | na      | 62  |
| YDR013W | PSF1    | 1 | pfam           | PF03651 | 208 |
| YDR014W | RAD61   | 1 | unassigned     | na      | 74  |
| YDR014W | RAD61   | 2 | msa            | na      | 280 |
| YDR014W | RAD61   | 3 | unassigned     | na      | 293 |
| YDR015C | YDR015C | 1 | unassigned     | na      | 129 |
| YDR016C | DAD1    | 1 | unassigned     | na      | 94  |
| YDR017C | KCS1    | 1 | unassigned     | na      | 594 |
| YDR017C | KCS1    | 2 | pfam           | PF03770 | 392 |
| YDR017C | KCS1    | 3 | unassigned     | na      | 64  |
| YDR018C | YDR018C | 1 | unassigned     | na      | 102 |
| YDR018C | YDR018C | 2 | psiblast       | 1k30A_  | 145 |
| YDR018C | YDR018C | 3 | msa            | na      | 149 |
| YDR019C | GCV1    | 1 | pfam           | PF01571 | 400 |
| YDR020C | YDR020C | 1 | psiblast       | 1a7j__  | 232 |
| YDR021W | FAL1    | 1 | psiblast       | 1fuuA_  | 399 |
| YDR022C | CIS1    | 1 | unassigned     | na      | 196 |
| YDR023W | SES1    | 1 | psiblast       | 1serA_  | 462 |
| YDR024W | FYV1    | 1 | unassigned     | na      | 161 |
| YDR026C | YDR026C | 1 | msa            | na      | 128 |
| YDR026C | YDR026C | 2 | unassigned     | na      | 146 |
| YDR026C | YDR026C | 3 | psiblast       | 1h88C_  | 68  |
| YDR026C | YDR026C | 4 | psiblast       | 1h88C_  | 50  |
| YDR026C | YDR026C | 5 | psiblast       | 1h88C_  | 81  |
| YDR026C | YDR026C | 6 | psiblast       | 1idy__  | 97  |
| YDR027C | VPS54   | 1 | fold_recogniti | 3btaA   | 189 |
| YDR027C | VPS54   | 2 | fold_recogniti | 3btaA   | 56  |
| YDR027C | VPS54   | 3 | fold_recogniti | 1hciA   | 172 |
| YDR027C | VPS54   | 4 | fold_recogniti | 1hciA   | 139 |
| YDR027C | VPS54   | 5 | fold_recogniti | 1hciA   | 137 |
| YDR027C | VPS54   | 6 | msa            | na      | 196 |
| YDR028C | REG1    | 1 | unassigned     | na      | 111 |
| YDR028C | REG1    | 2 | msa            | na      | 243 |
| YDR028C | REG1    | 3 | unassigned     | na      | 420 |
| YDR028C | REG1    | 4 | msa            | na      | 240 |
| YDR029W | YDR029W | 1 | unassigned     | na      | 104 |
| YDR030C | RAD28   | 1 | psiblast       | 1gxrA_  | 317 |
| YDR030C | RAD28   | 2 | psiblast       | 1gg2B_  | 88  |
| YDR030C | RAD28   | 3 | msa            | na      | 101 |

|           |           |   |                |         |     |
|-----------|-----------|---|----------------|---------|-----|
| YDR031W   | YDR031W   | 1 | unassigned     | na      | 117 |
| YDR032C   | PST2      | 1 | psiblast       | 1ag9A_  | 198 |
| YDR033W   | MRH1      | 1 | psiblast       | 1gu8A_  | 86  |
| YDR033W   | MRH1      | 2 | psiblast       | 1gu8A_  | 234 |
| YDR034C   | LYS14     | 1 | msa            | na      | 152 |
| YDR034C   | LYS14     | 2 | pfam           | PF00172 | 81  |
| YDR034C   | LYS14     | 3 | unassigned     | na      | 557 |
| YDR034C-A | YDR034C-A | 1 | unassigned     | na      | 58  |
| YDR034W-B | YDR034W-B | 1 | unassigned     | na      | 51  |
| YDR035W   | ARO3      | 1 | psiblast       | 1gg1A_  | 370 |
| YDR036C   | EHD3      | 1 | psiblast       | 1dubA_  | 247 |
| YDR036C   | EHD3      | 2 | psiblast       | 1dubA_  | 98  |
| YDR036C   | EHD3      | 3 | psiblast       | 3hdhA_  | 88  |
| YDR036C   | EHD3      | 4 | unassigned     | na      | 67  |
| YDR037W   | KRS1      | 1 | psiblast       | 1e1oA_  | 220 |
| YDR037W   | KRS1      | 2 | psiblast       | 1e1oA_  | 371 |
| YDR038C   | ENA5      | 1 | psiblast       | 1eulA_  | 187 |
| YDR038C   | ENA5      | 2 | psiblast       | 1eulA_  | 423 |
| YDR038C   | ENA5      | 3 | psiblast       | 1eulA_  | 207 |
| YDR038C   | ENA5      | 4 | psiblast       | 1eulA_  | 274 |
| YDR039C   | ENA2      | 1 | psiblast       | 1eulA_  | 187 |
| YDR039C   | ENA2      | 2 | psiblast       | 1eulA_  | 423 |
| YDR039C   | ENA2      | 3 | psiblast       | 1eulA_  | 207 |
| YDR039C   | ENA2      | 4 | psiblast       | 1eulA_  | 274 |
| YDR040C   | ENA1      | 1 | psiblast       | 1eulA_  | 187 |
| YDR040C   | ENA1      | 2 | psiblast       | 1eulA_  | 423 |
| YDR040C   | ENA1      | 3 | psiblast       | 1eulA_  | 207 |
| YDR040C   | ENA1      | 4 | psiblast       | 1eulA_  | 274 |
| YDR041W   | RSM10     | 1 | psiblast       | 1fjgJ_  | 203 |
| YDR042C   | YDR042C   | 1 | unassigned     | na      | 200 |
| YDR043C   | NRG1      | 1 | msa            | na      | 127 |
| YDR043C   | NRG1      | 2 | psiblast       | 1lu6A_  | 104 |
| YDR044W   | HEM13     | 1 | pfam           | PF01218 | 328 |
| YDR045C   | RPC11     | 1 | pfam           | PF02150 | 56  |
| YDR045C   | RPC11     | 2 | psiblast       | 1qyp__  | 54  |
| YDR046C   | BAP3      | 1 | unassigned     | na      | 74  |
| YDR046C   | BAP3      | 2 | pfam           | PF00324 | 530 |
| YDR047W   | HEM12     | 1 | psiblast       | 1uroA_  | 362 |
| YDR048C   | YDR048C   | 1 | unassigned     | na      | 104 |
| YDR049W   | YDR049W   | 1 | msa            | na      | 187 |
| YDR049W   | YDR049W   | 2 | unassigned     | na      | 118 |
| YDR049W   | YDR049W   | 3 | psiblast       | 1nfiE_  | 157 |
| YDR049W   | YDR049W   | 4 | psiblast       | 1nfiE_  | 80  |
| YDR049W   | YDR049W   | 5 | unassigned     | na      | 90  |
| YDR050C   | TPI1      | 1 | psiblast       | 7timA_  | 248 |
| YDR051C   | YDR051C   | 1 | fold_recogniti | 1fztA   | 334 |
| YDR052C   | DBF4      | 1 | msa            | na      | 358 |
| YDR052C   | DBF4      | 2 | fold_recogniti | 1ldvA   | 236 |

|         |         |   |                |         |     |
|---------|---------|---|----------------|---------|-----|
| YDR052C | DBF4    | 3 | unassigned     | na      | 110 |
| YDR053W | YDR053W | 1 | unassigned     | na      | 131 |
| YDR054C | CDC34   | 1 | psiblast       | 2ucz__  | 220 |
| YDR054C | CDC34   | 2 | unassigned     | na      | 75  |
| YDR055W | PST1    | 1 | psiblast       | 1h6uA_  | 126 |
| YDR055W | PST1    | 2 | psiblast       | 1jl5A_  | 237 |
| YDR055W | PST1    | 3 | unassigned     | na      | 81  |
| YDR056C | YDR056C | 1 | unassigned     | na      | 205 |
| YDR057W | YOS9    | 1 | msa            | na      | 265 |
| YDR057W | YOS9    | 2 | unassigned     | na      | 277 |
| YDR058C | TGL2    | 1 | psiblast       | 1tahB_  | 263 |
| YDR058C | TGL2    | 2 | psiblast       | 1tahB_  | 63  |
| YDR059C | UBC5    | 1 | psiblast       | 1qcqA_  | 148 |
| YDR060W | MAK21   | 1 | unassigned     | na      | 213 |
| YDR060W | MAK21   | 2 | pfam           | PF03914 | 709 |
| YDR060W | MAK21   | 3 | unassigned     | na      | 103 |
| YDR061W | YDR061W | 1 | psiblast       | 1g6hA_  | 296 |
| YDR061W | YDR061W | 2 | psiblast       | 1jj7A_  | 243 |
| YDR062W | LCB2    | 1 | unassigned     | na      | 99  |
| YDR062W | LCB2    | 2 | psiblast       | 1fc4A_  | 198 |
| YDR062W | LCB2    | 3 | psiblast       | 1fc4A_  | 264 |
| YDR063W | YDR063W | 1 | psiblast       | 1f7sA_  | 149 |
| YDR064W | RPS13   | 1 | psiblast       | 1k5xO_  | 151 |
| YDR065W | YDR065W | 1 | unassigned     | na      | 365 |
| YDR066C | YDR066C | 1 | unassigned     | na      | 196 |
| YDR067C | YDR067C | 1 | psiblast       | 1rpmA_  | 224 |
| YDR068W | DOS2    | 1 | unassigned     | na      | 165 |
| YDR068W | DOS2    | 2 | pfam           | PF03909 | 91  |
| YDR068W | DOS2    | 3 | unassigned     | na      | 54  |
| YDR069C | DOA4    | 1 | unassigned     | na      | 184 |
| YDR069C | DOA4    | 2 | psiblast       | 1d5vA_  | 151 |
| YDR069C | DOA4    | 3 | fold_recogniti | 1ldvA   | 226 |
| YDR069C | DOA4    | 4 | msa            | na      | 192 |
| YDR069C | DOA4    | 5 | msa            | na      | 173 |
| YDR070C | FMP16   | 1 | unassigned     | na      | 93  |
| YDR071C | PAA1    | 1 | psiblast       | 1kuvA_  | 191 |
| YDR072C | IPT1    | 1 | unassigned     | na      | 212 |
| YDR072C | IPT1    | 2 | pfam           | PF01569 | 315 |
| YDR073W | SNF11   | 1 | unassigned     | na      | 169 |
| YDR074W | TPS2    | 1 | unassigned     | na      | 120 |
| YDR074W | TPS2    | 2 | fold_recogniti | 1f6dA   | 219 |
| YDR074W | TPS2    | 3 | fold_recogniti | 1f6dA   | 206 |
| YDR074W | TPS2    | 4 | msa            | na      | 351 |
| YDR075W | PPH3    | 1 | psiblast       | 1fjmA_  | 308 |
| YDR076W | RAD55   | 1 | psiblast       | 2recA_  | 262 |
| YDR076W | RAD55   | 2 | psiblast       | 2recA_  | 74  |
| YDR076W | RAD55   | 3 | unassigned     | na      | 70  |
| YDR077W | SED1    | 1 | fold_recogniti | 1m2vB   | 338 |

|           |           |   |                |         |     |
|-----------|-----------|---|----------------|---------|-----|
| YDR078C   | SHU2      | 1 | unassigned     | na      | 223 |
| YDR079C-A | YDR079C-A | 1 | unassigned     | na      | 72  |
| YDR079W   | PET100    | 1 | unassigned     | na      | 111 |
| YDR080W   | VPS41     | 1 | psiblast       | 1erjA_  | 375 |
| YDR080W   | VPS41     | 2 | psiblast       | 1gg2B_  | 103 |
| YDR080W   | VPS41     | 3 | fold_recogniti | 1b89A   | 514 |
| YDR081C   | PDC2      | 1 | psiblast       | 1iufA_  | 68  |
| YDR081C   | PDC2      | 2 | psiblast       | 1iufA_  | 80  |
| YDR081C   | PDC2      | 3 | pfam           | PF03184 | 284 |
| YDR081C   | PDC2      | 4 | msa            | na      | 372 |
| YDR081C   | PDC2      | 5 | unassigned     | na      | 121 |
| YDR082W   | STN1      | 1 | unassigned     | na      | 494 |
| YDR083W   | RRP8      | 1 | unassigned     | na      | 127 |
| YDR083W   | RRP8      | 2 | psiblast       | 1ic3A_  | 143 |
| YDR083W   | RRP8      | 3 | psiblast       | 1ic3A_  | 132 |
| YDR084C   | TVP23     | 1 | unassigned     | na      | 199 |
| YDR085C   | AFR1      | 1 | unassigned     | na      | 620 |
| YDR086C   | SSS1      | 1 | pfam           | PF00584 | 80  |
| YDR087C   | RRP1      | 1 | unassigned     | na      | 88  |
| YDR087C   | RRP1      | 2 | msa            | na      | 190 |
| YDR088C   | SLU7      | 1 | msa            | na      | 174 |
| YDR088C   | SLU7      | 2 | unassigned     | na      | 208 |
| YDR089W   | YDR089W   | 1 | pfam           | PF03105 | 167 |
| YDR089W   | YDR089W   | 2 | unassigned     | na      | 81  |
| YDR089W   | YDR089W   | 3 | msa            | na      | 621 |
| YDR090C   | YDR090C   | 1 | msa            | na      | 256 |
| YDR090C   | YDR090C   | 2 | unassigned     | na      | 54  |
| YDR091C   | RLI1      | 1 | fold_recogniti | 1kqfB   | 73  |
| YDR091C   | RLI1      | 2 | psiblast       | 1g291_  | 294 |
| YDR091C   | RLI1      | 3 | psiblast       | 1l7vC_  | 241 |
| YDR092W   | UBC13     | 1 | psiblast       | 1jbbA_  | 153 |
| YDR093W   | DNF2      | 1 | unassigned     | na      | 172 |
| YDR093W   | DNF2      | 2 | msa            | na      | 147 |
| YDR093W   | DNF2      | 3 | psiblast       | 1eulA_  | 196 |
| YDR093W   | DNF2      | 4 | psiblast       | 1eulA_  | 430 |
| YDR093W   | DNF2      | 5 | psiblast       | 1eulA_  | 225 |
| YDR093W   | DNF2      | 6 | psiblast       | 1eulA_  | 290 |
| YDR093W   | DNF2      | 7 | unassigned     | na      | 152 |
| YDR094W   | YDR094W   | 1 | unassigned     | na      | 111 |
| YDR095C   | YDR095C   | 1 | unassigned     | na      | 136 |
| YDR096W   | GIS1      | 1 | pfam           | PF02375 | 79  |
| YDR096W   | GIS1      | 2 | unassigned     | na      | 57  |
| YDR096W   | GIS1      | 3 | pfam           | PF02373 | 171 |
| YDR096W   | GIS1      | 4 | msa            | na      | 88  |
| YDR096W   | GIS1      | 5 | unassigned     | na      | 70  |
| YDR096W   | GIS1      | 6 | psiblast       | 2gliA_  | 150 |
| YDR096W   | GIS1      | 7 | psiblast       | 1a1iA_  | 79  |
| YDR096W   | GIS1      | 8 | msa            | na      | 81  |

|         |         |    |                |         |     |
|---------|---------|----|----------------|---------|-----|
| YDR096W | GIS1    | 9  | psiblast       | 2drpA_  | 73  |
| YDR096W | GIS1    | 10 | psiblast       | 2adr__  | 46  |
| YDR097C | MSH6    | 1  | fold_recogniti | 1ldvA   | 248 |
| YDR097C | MSH6    | 2  | fold_recogniti | 1k83A   | 55  |
| YDR097C | MSH6    | 3  | psiblast       | 1e3mA_  | 114 |
| YDR097C | MSH6    | 4  | psiblast       | 1e3mA_  | 194 |
| YDR097C | MSH6    | 5  | psiblast       | 1e3mA_  | 300 |
| YDR097C | MSH6    | 6  | psiblast       | 1e3mA_  | 205 |
| YDR097C | MSH6    | 7  | psiblast       | 1e3mA_  | 74  |
| YDR097C | MSH6    | 8  | unassigned     | na      | 52  |
| YDR098C | GRX3    | 1  | psiblast       | 1erv__  | 147 |
| YDR098C | GRX3    | 2  | psiblast       | 1bjx__  | 138 |
| YDR099W | BMH2    | 1  | psiblast       | 1a37A_  | 115 |
| YDR099W | BMH2    | 2  | psiblast       | 1a37A_  | 158 |
| YDR100W | TVP15   | 1  | unassigned     | na      | 143 |
| YDR101C | ARX1    | 1  | psiblast       | 4matA_  | 355 |
| YDR101C | ARX1    | 2  | unassigned     | na      | 238 |
| YDR102C | YDR102C | 1  | unassigned     | na      | 110 |
| YDR103W | STE5    | 1  | unassigned     | na      | 917 |
| YDR104C | SPO71   | 1  | unassigned     | na      | 996 |
| YDR104C | SPO71   | 2  | pfam           | PF00169 | 249 |
| YDR105C | TMS1    | 1  | pfam           | PF03348 | 473 |
| YDR106W | ARP10   | 1  | psiblast       | 1hluA_  | 99  |
| YDR106W | ARP10   | 2  | psiblast       | 1hluA_  | 185 |
| YDR107C | YDR107C | 1  | pfam           | PF02990 | 672 |
| YDR108W | GSG1    | 1  | unassigned     | na      | 327 |
| YDR108W | GSG1    | 2  | msa            | na      | 173 |
| YDR108W | GSG1    | 3  | unassigned     | na      | 198 |
| YDR109C | YDR109C | 1  | psiblast       | 1bwfY_  | 335 |
| YDR109C | YDR109C | 2  | psiblast       | 1bwfY_  | 77  |
| YDR109C | YDR109C | 3  | psiblast       | 1bwfY_  | 213 |
| YDR109C | YDR109C | 4  | unassigned     | na      | 90  |
| YDR110W | FOB1    | 1  | unassigned     | na      | 566 |
| YDR111C | ALT2    | 1  | psiblast       | 1iaxA_  | 187 |
| YDR111C | ALT2    | 2  | psiblast       | 1iaxA_  | 320 |
| YDR112W | YDR112W | 1  | unassigned     | na      | 102 |
| YDR113C | PDS1    | 1  | unassigned     | na      | 373 |
| YDR114C | YDR114C | 1  | unassigned     | na      | 100 |
| YDR115W | YDR115W | 1  | psiblast       | 1lnr2_  | 105 |
| YDR116C | MRPL1   | 1  | psiblast       | 1egON_  | 201 |
| YDR116C | MRPL1   | 2  | psiblast       | 1egON_  | 84  |
| YDR117C | YDR117C | 1  | psiblast       | 1k8wA_  | 59  |
| YDR117C | YDR117C | 2  | psiblast       | 1it7A_  | 134 |
| YDR117C | YDR117C | 3  | unassigned     | na      | 243 |
| YDR117C | YDR117C | 4  | fold_recogniti | 1d1rA   | 129 |
| YDR118W | APC4    | 1  | unassigned     | na      | 155 |
| YDR118W | APC4    | 2  | fold_recogniti | 1qoyA   | 326 |
| YDR118W | APC4    | 3  | fold_recogniti | 1qoyA   | 40  |

|         |         |                  |         |     |
|---------|---------|------------------|---------|-----|
| YDR118W | APC4    | 4 unassigned     | na      | 131 |
| YDR119W | YDR119W | 1 unassigned     | na      | 74  |
| YDR119W | YDR119W | 2 msa            | na      | 170 |
| YDR119W | YDR119W | 3 psiblast       | 1ja5A_  | 307 |
| YDR119W | YDR119W | 4 psiblast       | 1ja5A_  | 81  |
| YDR119W | YDR119W | 5 psiblast       | 1kplA_  | 136 |
| YDR120C | TRM1    | 1 psiblast       | 1jg1A_  | 264 |
| YDR120C | TRM1    | 2 msa            | na      | 306 |
| YDR121W | DPB4    | 1 psiblast       | 1jfiB_  | 101 |
| YDR121W | DPB4    | 2 psiblast       | 1jfiB_  | 95  |
| YDR122W | KIN1    | 1 psiblast       | 1dsyA_  | 90  |
| YDR122W | KIN1    | 2 psiblast       | 1a06__  | 138 |
| YDR122W | KIN1    | 3 psiblast       | 1a06__  | 238 |
| YDR122W | KIN1    | 4 unassigned     | na      | 87  |
| YDR122W | KIN1    | 5 fold_recogniti | 1i3qA   | 384 |
| YDR122W | KIN1    | 6 msa            | na      | 127 |
| YDR123C | INO2    | 1 unassigned     | na      | 214 |
| YDR123C | INO2    | 2 pfam           | PF00010 | 90  |
| YDR124W | YDR124W | 1 unassigned     | na      | 63  |
| YDR124W | YDR124W | 2 msa            | na      | 102 |
| YDR124W | YDR124W | 3 unassigned     | na      | 159 |
| YDR125C | ECM18   | 1 unassigned     | na      | 77  |
| YDR125C | ECM18   | 2 psiblast       | 1cqzA_  | 376 |
| YDR126W | SWF1    | 1 unassigned     | na      | 118 |
| YDR126W | SWF1    | 2 pfam           | PF01529 | 88  |
| YDR126W | SWF1    | 3 msa            | na      | 130 |
| YDR127W | ARO1    | 1 psiblast       | 1dqsA_  | 177 |
| YDR127W | ARO1    | 2 psiblast       | 1dqsA_  | 75  |
| YDR127W | ARO1    | 3 psiblast       | 1dqsA_  | 149 |
| YDR127W | ARO1    | 4 psiblast       | 1ln5A_  | 111 |
| YDR127W | ARO1    | 5 psiblast       | 1ln5A_  | 368 |
| YDR127W | ARO1    | 6 psiblast       | 1shkA_  | 177 |
| YDR127W | ARO1    | 7 psiblast       | 1qfeA_  | 122 |
| YDR127W | ARO1    | 8 psiblast       | 1qfeA_  | 125 |
| YDR127W | ARO1    | 9 pfam           | PF01488 | 116 |
| YDR127W | ARO1    | 10 psiblast      | 1gpjA_  | 168 |
| YDR128W | YDR128W | 1 psiblast       | 1gg2B_  | 346 |
| YDR128W | YDR128W | 2 msa            | na      | 139 |
| YDR128W | YDR128W | 3 unassigned     | na      | 77  |
| YDR128W | YDR128W | 4 msa            | na      | 270 |
| YDR128W | YDR128W | 5 unassigned     | na      | 231 |
| YDR128W | YDR128W | 6 msa            | na      | 85  |
| YDR129C | SAC6    | 1 psiblast       | 1a29__  | 121 |
| YDR129C | SAC6    | 2 psiblast       | 1aoa__  | 140 |
| YDR129C | SAC6    | 3 psiblast       | 1aoa__  | 130 |
| YDR129C | SAC6    | 4 psiblast       | 1g8xA_  | 137 |
| YDR129C | SAC6    | 5 fold_recogniti | 1bkrA   | 114 |
| YDR130C | FIN1    | 1 unassigned     | na      | 291 |



|         |         |   |                |         |     |
|---------|---------|---|----------------|---------|-----|
| YDR131C | YDR131C | 1 | unassigned     | na      | 556 |
| YDR132C | YDR132C | 1 | fold_recogniti | 1qdvA   | 86  |
| YDR132C | YDR132C | 2 | fold_recogniti | 1qdvA   | 96  |
| YDR132C | YDR132C | 3 | unassigned     | na      | 313 |
| YDR133C | YDR133C | 1 | unassigned     | na      | 111 |
| YDR134C | YDR134C | 1 | unassigned     | na      | 66  |
| YDR135C | YCF1    | 1 | msa            | na      | 267 |
| YDR135C | YCF1    | 2 | pfam           | PF00664 | 342 |
| YDR135C | YCF1    | 3 | psiblast       | 1nbd__  | 256 |
| YDR135C | YCF1    | 4 | unassigned     | na      | 69  |
| YDR135C | YCF1    | 5 | psiblast       | 1jsqA_  | 296 |
| YDR135C | YCF1    | 6 | psiblast       | 1jsqA_  | 285 |
| YDR136C | VPS61   | 1 | unassigned     | na      | 190 |
| YDR137W | RGP1    | 1 | unassigned     | na      | 187 |
| YDR137W | RGP1    | 2 | msa            | na      | 163 |
| YDR137W | RGP1    | 3 | unassigned     | na      | 105 |
| YDR137W | RGP1    | 4 | msa            | na      | 208 |
| YDR138W | HPR1    | 1 | unassigned     | na      | 752 |
| YDR139C | RUB1    | 1 | psiblast       | 1ndda_  | 77  |
| YDR140W | YDR140W | 1 | psiblast       | 1aqjA_  | 221 |
| YDR141C | DOP1    | 1 | msa            | na      | 235 |
| YDR141C | DOP1    | 2 | unassigned     | na      | 657 |
| YDR141C | DOP1    | 3 | msa            | na      | 806 |
| YDR142C | PEX7    | 1 | psiblast       | 1gg2B_  | 375 |
| YDR143C | SAN1    | 1 | msa            | na      | 135 |
| YDR143C | SAN1    | 2 | unassigned     | na      | 77  |
| YDR143C | SAN1    | 3 | psiblast       | 1chc__  | 123 |
| YDR143C | SAN1    | 4 | unassigned     | na      | 52  |
| YDR143C | SAN1    | 5 | msa            | na      | 223 |
| YDR144C | MKC7    | 1 | psiblast       | 1lcgA_  | 144 |
| YDR144C | MKC7    | 2 | psiblast       | 1ypsA_  | 132 |
| YDR144C | MKC7    | 3 | psiblast       | 1ypsA_  | 80  |
| YDR144C | MKC7    | 4 | psiblast       | 1ypsA_  | 139 |
| YDR144C | MKC7    | 5 | unassigned     | na      | 101 |
| YDR145W | TAF12   | 1 | unassigned     | na      | 232 |
| YDR145W | TAF12   | 2 | msa            | na      | 173 |
| YDR145W | TAF12   | 3 | fold_recogniti | 1h3oB   | 134 |
| YDR146C | SWI5    | 1 | unassigned     | na      | 74  |
| YDR146C | SWI5    | 2 | msa            | na      | 108 |
| YDR146C | SWI5    | 3 | msa            | na      | 116 |
| YDR146C | SWI5    | 4 | psiblast       | 1bbo__  | 61  |
| YDR146C | SWI5    | 5 | msa            | na      | 118 |
| YDR146C | SWI5    | 6 | psiblast       | 2gliA_  | 107 |
| YDR146C | SWI5    | 7 | psiblast       | 1meyG_  | 125 |
| YDR147W | EK11    | 1 | unassigned     | na      | 98  |
| YDR147W | EK11    | 2 | psiblast       | 1j7iA_  | 94  |
| YDR147W | EK11    | 3 | psiblast       | 1j7iA_  | 255 |
| YDR147W | EK11    | 4 | unassigned     | na      | 87  |

|         |         |   |                |         |     |
|---------|---------|---|----------------|---------|-----|
| YDR148C | KGD2    | 1 | unassigned     | na      | 70  |
| YDR148C | KGD2    | 2 | psiblast       | 1lab__  | 112 |
| YDR148C | KGD2    | 3 | psiblast       | 2pdd__  | 49  |
| YDR148C | KGD2    | 4 | psiblast       | 1c4tA_  | 232 |
| YDR149C | YDR149C | 1 | unassigned     | na      | 235 |
| YDR151C | CTH1    | 1 | fold_recogniti | 1k83A   | 325 |
| YDR152W | GIR2    | 1 | msa            | na      | 112 |
| YDR152W | GIR2    | 2 | msa            | na      | 153 |
| YDR153C | ENT5    | 1 | psiblast       | 1eyhA_  | 219 |
| YDR153C | ENT5    | 2 | psiblast       | 1deqA_  | 192 |
| YDR154C | YDR154C | 1 | unassigned     | na      | 116 |
| YDR155C | CPR1    | 1 | psiblast       | 1ak4A_  | 162 |
| YDR156W | RPA14   | 1 | unassigned     | na      | 137 |
| YDR157W | YDR157W | 1 | unassigned     | na      | 133 |
| YDR158W | HOM2    | 1 | psiblast       | 1gpdG_  | 171 |
| YDR158W | HOM2    | 2 | psiblast       | 1gpdG_  | 194 |
| YDR159W | SAC3    | 1 | unassigned     | na      | 187 |
| YDR159W | SAC3    | 2 | pfam           | PF03399 | 364 |
| YDR159W | SAC3    | 3 | unassigned     | na      | 58  |
| YDR159W | SAC3    | 4 | psiblast       | 1i84S_  | 224 |
| YDR159W | SAC3    | 5 | unassigned     | na      | 468 |
| YDR160W | SSY1    | 1 | unassigned     | na      | 231 |
| YDR160W | SSY1    | 2 | pfam           | PF00324 | 621 |
| YDR161W | YDR161W | 1 | fold_recogniti | 1qsaA   | 127 |
| YDR161W | YDR161W | 2 | fold_recogniti | 1qsaA   | 90  |
| YDR161W | YDR161W | 3 | fold_recogniti | 1qsaA   | 170 |
| YDR162C | NBP2    | 1 | unassigned     | na      | 103 |
| YDR162C | NBP2    | 2 | psiblast       | 1qlyA_  | 63  |
| YDR162C | NBP2    | 3 | psiblast       | 1aotF_  | 70  |
| YDR163W | CWC15   | 1 | unassigned     | na      | 175 |
| YDR164C | SEC1    | 1 | psiblast       | 1fvfA_  | 132 |
| YDR164C | SEC1    | 2 | psiblast       | 1fvfA_  | 276 |
| YDR164C | SEC1    | 3 | psiblast       | 1fvfA_  | 120 |
| YDR164C | SEC1    | 4 | psiblast       | 1fvfA_  | 129 |
| YDR164C | SEC1    | 5 | unassigned     | na      | 67  |
| YDR165W | TRM82   | 1 | psiblast       | 1erjA_  | 90  |
| YDR165W | TRM82   | 2 | psiblast       | 1gg2B_  | 354 |
| YDR166C | SEC5    | 1 | unassigned     | na      | 86  |
| YDR166C | SEC5    | 2 | msa            | na      | 76  |
| YDR166C | SEC5    | 3 | msa            | na      | 230 |
| YDR166C | SEC5    | 4 | unassigned     | na      | 140 |
| YDR166C | SEC5    | 5 | msa            | na      | 139 |
| YDR166C | SEC5    | 6 | unassigned     | na      | 54  |
| YDR166C | SEC5    | 7 | msa            | na      | 246 |
| YDR167W | TAF10   | 1 | unassigned     | na      | 66  |
| YDR167W | TAF10   | 2 | pfam           | PF03540 | 140 |
| YDR168W | CDC37   | 1 | fold_recogniti | 1bgxT   | 445 |
| YDR168W | CDC37   | 2 | fold_recogniti | 1bgxT   | 61  |

|           |           |   |                |         |      |
|-----------|-----------|---|----------------|---------|------|
| YDR169C   | STB3      | 1 | msa            | na      | 118  |
| YDR169C   | STB3      | 2 | unassigned     | na      | 395  |
| YDR170C   | SEC7      | 1 | psiblast       | 1i84S_  | 355  |
| YDR170C   | SEC7      | 2 | unassigned     | na      | 422  |
| YDR170C   | SEC7      | 3 | psiblast       | 1pbv__  | 120  |
| YDR170C   | SEC7      | 4 | psiblast       | 1pbv__  | 135  |
| YDR170C   | SEC7      | 5 | fold_recogniti | 1b3uA   | 293  |
| YDR170C   | SEC7      | 6 | fold_recogniti | 1b3uA   | 76   |
| YDR170C   | SEC7      | 7 | fold_recogniti | 1b3uA   | 307  |
| YDR170C   | SEC7      | 8 | unassigned     | na      | 63   |
| YDR170C   | SEC7      | 9 | msa            | na      | 238  |
| YDR171W   | HSP42     | 1 | unassigned     | na      | 188  |
| YDR171W   | HSP42     | 2 | psiblast       | 1gmeA_  | 187  |
| YDR172W   | SUP35     | 1 | fold_recogniti | 1ldvA   | 254  |
| YDR172W   | SUP35     | 2 | psiblast       | 1jnyA_  | 228  |
| YDR172W   | SUP35     | 3 | psiblast       | 1jnyA_  | 94   |
| YDR172W   | SUP35     | 4 | psiblast       | 1jnyA_  | 109  |
| YDR173C   | ARG82     | 1 | pfam           | PF03770 | 355  |
| YDR174W   | HMO1      | 1 | unassigned     | na      | 92   |
| YDR174W   | HMO1      | 2 | psiblast       | 1k99A_  | 154  |
| YDR175C   | RSM24     | 1 | unassigned     | na      | 127  |
| YDR175C   | RSM24     | 2 | msa            | na      | 192  |
| YDR176W   | NGG1      | 1 | unassigned     | na      | 702  |
| YDR177W   | UBC1      | 1 | psiblast       | 1fxtA_  | 215  |
| YDR178W   | SDH4      | 1 | unassigned     | na      | 181  |
| YDR179C   | CSN9      | 1 | unassigned     | na      | 162  |
| YDR179W-A | YDR179W-A | 1 | unassigned     | na      | 268  |
| YDR180W   | SCC2      | 1 | unassigned     | na      | 354  |
| YDR180W   | SCC2      | 2 | msa            | na      | 1054 |
| YDR180W   | SCC2      | 3 | unassigned     | na      | 85   |
| YDR181C   | SAS4      | 1 | unassigned     | na      | 481  |
| YDR182W   | CDC1      | 1 | psiblast       | 1kbpA_  | 161  |
| YDR182W   | CDC1      | 2 | psiblast       | 1kbpA_  | 200  |
| YDR182W   | CDC1      | 3 | unassigned     | na      | 130  |
| YDR183W   | PLP1      | 1 | psiblast       | 1b9yC_  | 230  |
| YDR184C   | ATC1      | 1 | unassigned     | na      | 131  |
| YDR184C   | ATC1      | 2 | msa            | na      | 163  |
| YDR185C   | YDR185C   | 1 | unassigned     | na      | 179  |
| YDR186C   | YDR186C   | 1 | unassigned     | na      | 77   |
| YDR186C   | YDR186C   | 2 | fold_recogniti | 1I9uD   | 337  |
| YDR186C   | YDR186C   | 3 | unassigned     | na      | 75   |
| YDR186C   | YDR186C   | 4 | fold_recogniti | 1iu4A   | 388  |
| YDR187C   | YDR187C   | 1 | unassigned     | na      | 172  |
| YDR188W   | CCT6      | 1 | psiblast       | 1a6dA_  | 423  |
| YDR188W   | CCT6      | 2 | psiblast       | 1a6dA_  | 123  |
| YDR189W   | SLY1      | 1 | psiblast       | 1fvfA_  | 160  |
| YDR189W   | SLY1      | 2 | psiblast       | 1fvfA_  | 223  |
| YDR189W   | SLY1      | 3 | psiblast       | 1fvfA_  | 134  |

|         |         |   |                |         |     |
|---------|---------|---|----------------|---------|-----|
| YDR189W | SLY1    | 4 | psiblast       | 1fvfA_  | 149 |
| YDR190C | RVB1    | 1 | psiblast       | 1e32A_  | 230 |
| YDR190C | RVB1    | 2 | psiblast       | 1e32A_  | 95  |
| YDR190C | RVB1    | 3 | psiblast       | 1jr3A_  | 138 |
| YDR191W | HST4    | 1 | psiblast       | 1iciA_  | 257 |
| YDR191W | HST4    | 2 | psiblast       | 1iciA_  | 113 |
| YDR192C | NUP42   | 1 | fold_recogniti | 1ei3A   | 328 |
| YDR192C | NUP42   | 2 | fold_recogniti | 1deqA   | 102 |
| YDR193W | YDR193W | 1 | unassigned     | na      | 132 |
| YDR194C | MSS116  | 1 | unassigned     | na      | 101 |
| YDR194C | MSS116  | 2 | psiblast       | 1hv8A_  | 236 |
| YDR194C | MSS116  | 3 | psiblast       | 1hv8A_  | 157 |
| YDR194C | MSS116  | 4 | psiblast       | 1d2mA_  | 170 |
| YDR195W | REF2    | 1 | fold_recogniti | 1iwpA   | 465 |
| YDR195W | REF2    | 2 | unassigned     | na      | 68  |
| YDR196C | YDR196C | 1 | psiblast       | 1jjvA_  | 185 |
| YDR196C | YDR196C | 2 | psiblast       | 1jjvA_  | 56  |
| YDR197W | CBS2    | 1 | psiblast       | 1ks9A_  | 245 |
| YDR197W | CBS2    | 2 | psiblast       | 1ks9A_  | 144 |
| YDR198C | YDR198C | 1 | msa            | na      | 357 |
| YDR198C | YDR198C | 2 | unassigned     | na      | 122 |
| YDR199W | YDR199W | 1 | unassigned     | na      | 121 |
| YDR200C | VPS64   | 1 | msa            | na      | 152 |
| YDR200C | VPS64   | 2 | unassigned     | na      | 67  |
| YDR200C | VPS64   | 3 | psiblast       | 1i84S_  | 385 |
| YDR201W | SPC19   | 1 | unassigned     | na      | 165 |
| YDR202C | RAV2    | 1 | unassigned     | na      | 351 |
| YDR203W | YDR203W | 1 | psiblast       | 1crl__  | 105 |
| YDR204W | COQ4    | 1 | unassigned     | na      | 79  |
| YDR204W | COQ4    | 2 | msa            | na      | 256 |
| YDR205W | MSC2    | 1 | unassigned     | na      | 379 |
| YDR205W | MSC2    | 2 | pfam           | PF01545 | 361 |
| YDR206W | EBS1    | 1 | fold_recogniti | 1hz4A   | 80  |
| YDR206W | EBS1    | 2 | fold_recogniti | 1hz4A   | 184 |
| YDR206W | EBS1    | 3 | fold_recogniti | 1hz4A   | 216 |
| YDR206W | EBS1    | 4 | unassigned     | na      | 404 |
| YDR207C | UME6    | 1 | unassigned     | na      | 251 |
| YDR207C | UME6    | 2 | fold_recogniti | 1je5A   | 232 |
| YDR207C | UME6    | 3 | unassigned     | na      | 136 |
| YDR207C | UME6    | 4 | msa            | na      | 140 |
| YDR207C | UME6    | 5 | psiblast       | 1qp9A_  | 77  |
| YDR208W | MSS4    | 1 | unassigned     | na      | 299 |
| YDR208W | MSS4    | 2 | psiblast       | 1bo1A_  | 257 |
| YDR208W | MSS4    | 3 | psiblast       | 1bo1A_  | 223 |
| YDR209C | YDR209C | 1 | unassigned     | na      | 137 |
| YDR210W | YDR210W | 1 | unassigned     | na      | 75  |
| YDR211W | GCD6    | 1 | psiblast       | 1hv9A_  | 299 |
| YDR211W | GCD6    | 2 | psiblast       | 1hv9A_  | 217 |

|         |         |   |                |         |      |
|---------|---------|---|----------------|---------|------|
| YDR211W | GCD6    | 3 | unassigned     | na      | 110  |
| YDR211W | GCD6    | 4 | pfam           | PF02020 | 86   |
| YDR212W | TCP1    | 1 | psiblast       | 1a6dA_  | 432  |
| YDR212W | TCP1    | 2 | psiblast       | 1a6dA_  | 127  |
| YDR213W | UPC2    | 1 | psiblast       | 1pyiA_  | 166  |
| YDR213W | UPC2    | 2 | unassigned     | na      | 479  |
| YDR213W | UPC2    | 3 | msa            | na      | 149  |
| YDR213W | UPC2    | 4 | unassigned     | na      | 119  |
| YDR214W | AHA1    | 1 | msa            | na      | 166  |
| YDR214W | AHA1    | 2 | msa            | na      | 184  |
| YDR215C | YDR215C | 1 | unassigned     | na      | 127  |
| YDR216W | ADR1    | 1 | psiblast       | 1a1IA_  | 100  |
| YDR216W | ADR1    | 2 | psiblast       | 2adr__  | 59   |
| YDR216W | ADR1    | 3 | psiblast       | 1ubdC_  | 106  |
| YDR216W | ADR1    | 4 | msa            | na      | 154  |
| YDR216W | ADR1    | 5 | unassigned     | na      | 403  |
| YDR216W | ADR1    | 6 | msa            | na      | 501  |
| YDR217C | RAD9    | 1 | unassigned     | na      | 991  |
| YDR217C | RAD9    | 2 | pfam           | PF00533 | 144  |
| YDR217C | RAD9    | 3 | unassigned     | na      | 174  |
| YDR218C | SPR28   | 1 | fold_recogniti | 1egaA   | 246  |
| YDR218C | SPR28   | 2 | fold_recogniti | 1egaA   | 105  |
| YDR218C | SPR28   | 3 | msa            | na      | 72   |
| YDR219C | YDR219C | 1 | pfam           | PF00646 | 126  |
| YDR219C | YDR219C | 2 | unassigned     | na      | 339  |
| YDR220C | YDR220C | 1 | unassigned     | na      | 97   |
| YDR221W | YDR221W | 1 | psiblast       | 1jv2B_  | 276  |
| YDR221W | YDR221W | 2 | unassigned     | na      | 158  |
| YDR221W | YDR221W | 3 | msa            | na      | 126  |
| YDR221W | YDR221W | 4 | fold_recogniti | 1keoA   | 142  |
| YDR222W | YDR222W | 1 | unassigned     | na      | 415  |
| YDR223W | YDR223W | 1 | unassigned     | na      | 202  |
| YDR223W | YDR223W | 2 | msa            | na      | 265  |
| YDR224C | HTB1    | 1 | psiblast       | 1id3D_  | 131  |
| YDR225W | HTA1    | 1 | psiblast       | 1id3C_  | 59   |
| YDR225W | HTA1    | 2 | psiblast       | 1id3C_  | 73   |
| YDR226W | ADK1    | 1 | psiblast       | 1aky__  | 222  |
| YDR227W | SIR4    | 1 | msa            | na      | 123  |
| YDR227W | SIR4    | 2 | unassigned     | na      | 1235 |
| YDR228C | PCF11   | 1 | msa            | na      | 117  |
| YDR228C | PCF11   | 2 | msa            | na      | 343  |
| YDR228C | PCF11   | 3 | unassigned     | na      | 54   |
| YDR228C | PCF11   | 4 | msa            | na      | 112  |
| YDR229W | IVY1    | 1 | unassigned     | na      | 91   |
| YDR229W | IVY1    | 2 | fold_recogniti | 1i49A   | 234  |
| YDR229W | IVY1    | 3 | unassigned     | na      | 128  |
| YDR230W | YDR230W | 1 | unassigned     | na      | 115  |
| YDR231C | COX20   | 1 | unassigned     | na      | 205  |

|         |         |   |            |         |     |
|---------|---------|---|------------|---------|-----|
| YDR232W | HEM1    | 1 | unassigned | na      | 66  |
| YDR232W | HEM1    | 2 | psiblast   | 1fc4A_  | 211 |
| YDR232W | HEM1    | 3 | psiblast   | 1fc4A_  | 271 |
| YDR233C | RTN1    | 1 | pfam       | PF02453 | 219 |
| YDR233C | RTN1    | 2 | unassigned | na      | 76  |
| YDR234W | LYS4    | 1 | psiblast   | 5acn__  | 517 |
| YDR234W | LYS4    | 2 | psiblast   | 5acn__  | 176 |
| YDR235W | PRP42   | 1 | psiblast   | 1fchA_  | 193 |
| YDR235W | PRP42   | 2 | psiblast   | 1fchA_  | 97  |
| YDR235W | PRP42   | 3 | psiblast   | 1fchA_  | 119 |
| YDR235W | PRP42   | 4 | unassigned | na      | 135 |
| YDR236C | FMN1    | 1 | unassigned | na      | 69  |
| YDR236C | FMN1    | 2 | pfam       | PF01687 | 149 |
| YDR237W | MRPL7   | 1 | unassigned | na      | 102 |
| YDR237W | MRPL7   | 2 | psiblast   | 1iq4A_  | 190 |
| YDR238C | SEC26   | 1 | psiblast   | 1gw5B_  | 106 |
| YDR238C | SEC26   | 2 | psiblast   | 1gw5B_  | 105 |
| YDR238C | SEC26   | 3 | psiblast   | 1gw5B_  | 125 |
| YDR238C | SEC26   | 4 | psiblast   | 1gw5B_  | 100 |
| YDR238C | SEC26   | 5 | psiblast   | 1gw5B_  | 83  |
| YDR238C | SEC26   | 6 | psiblast   | 1jpwA_  | 96  |
| YDR238C | SEC26   | 7 | unassigned | na      | 174 |
| YDR238C | SEC26   | 8 | msa        | na      | 184 |
| YDR239C | YDR239C | 1 | unassigned | na      | 787 |
| YDR240C | SNU56   | 1 | unassigned | na      | 492 |
| YDR241W | BUD26   | 1 | unassigned | na      | 95  |
| YDR242W | AMD2    | 1 | psiblast   | 1gr8A_  | 549 |
| YDR243C | PRP28   | 1 | unassigned | na      | 139 |
| YDR243C | PRP28   | 2 | psiblast   | 1hv8A_  | 263 |
| YDR243C | PRP28   | 3 | psiblast   | 1hv8A_  | 186 |
| YDR244W | PEX5    | 1 | unassigned | na      | 195 |
| YDR244W | PEX5    | 2 | psiblast   | 1fchA_  | 200 |
| YDR244W | PEX5    | 3 | psiblast   | 1fchA_  | 76  |
| YDR244W | PEX5    | 4 | psiblast   | 1fchA_  | 60  |
| YDR244W | PEX5    | 5 | psiblast   | 1fchA_  | 81  |
| YDR245W | MNN10   | 1 | unassigned | na      | 105 |
| YDR245W | MNN10   | 2 | msa        | na      | 140 |
| YDR245W | MNN10   | 3 | unassigned | na      | 148 |
| YDR246W | TRS23   | 1 | msa        | na      | 74  |
| YDR246W | TRS23   | 2 | msa        | na      | 145 |
| YDR247W | VHS1    | 1 | psiblast   | 1giiA_  | 127 |
| YDR247W | VHS1    | 2 | psiblast   | 1giiA_  | 81  |
| YDR247W | VHS1    | 3 | psiblast   | 1giiA_  | 128 |
| YDR247W | VHS1    | 4 | psiblast   | 1dtIA_  | 125 |
| YDR248C | YDR248C | 1 | psiblast   | 1knqA_  | 193 |
| YDR249C | YDR249C | 1 | unassigned | na      | 373 |
| YDR250C | YDR250C | 1 | unassigned | na      | 91  |
| YDR251W | PAM1    | 1 | psiblast   | 1ks9A_  | 213 |

|         |         |   |                |         |     |
|---------|---------|---|----------------|---------|-----|
| YDR251W | PAM1    | 2 | psiblast       | 1ks9A_  | 158 |
| YDR251W | PAM1    | 3 | unassigned     | na      | 90  |
| YDR251W | PAM1    | 4 | fold_recogniti | 1i3qA   | 369 |
| YDR252W | BTT1    | 1 | pfam           | PF01849 | 149 |
| YDR253C | MET32   | 1 | psiblast       | 1meyG_  | 191 |
| YDR254W | CHL4    | 1 | msa            | na      | 228 |
| YDR254W | CHL4    | 2 | unassigned     | na      | 230 |
| YDR255C | RMD5    | 1 | msa            | na      | 72  |
| YDR255C | RMD5    | 2 | msa            | na      | 208 |
| YDR255C | RMD5    | 3 | msa            | na      | 141 |
| YDR256C | CTA1    | 1 | psiblast       | 1a4eA_  | 59  |
| YDR256C | CTA1    | 2 | psiblast       | 1a4eA_  | 456 |
| YDR257C | SET7    | 1 | msa            | na      | 281 |
| YDR257C | SET7    | 2 | unassigned     | na      | 213 |
| YDR258C | HSP78   | 1 | unassigned     | na      | 91  |
| YDR258C | HSP78   | 2 | psiblast       | 1jbkA_  | 195 |
| YDR258C | HSP78   | 3 | fold_recogniti | 1ksfX   | 139 |
| YDR258C | HSP78   | 4 | psiblast       | 1iqpA_  | 263 |
| YDR258C | HSP78   | 5 | fold_recogniti | 1e94E   | 123 |
| YDR259C | YAP6    | 1 | unassigned     | na      | 57  |
| YDR259C | YAP6    | 2 | psiblast       | 1i84S_  | 326 |
| YDR260C | SWM1    | 1 | unassigned     | na      | 170 |
| YDR261C | EXG2    | 1 | psiblast       | 1cz1A_  | 369 |
| YDR261C | EXG2    | 2 | psiblast       | 1cz1A_  | 129 |
| YDR261C | EXG2    | 3 | unassigned     | na      | 64  |
| YDR262W | YDR262W | 1 | unassigned     | na      | 272 |
| YDR263C | DIN7    | 1 | psiblast       | 1a76__  | 349 |
| YDR263C | DIN7    | 2 | unassigned     | na      | 81  |
| YDR264C | AKR1    | 1 | psiblast       | 1k1aA_  | 170 |
| YDR264C | AKR1    | 2 | psiblast       | 1k1aA_  | 174 |
| YDR264C | AKR1    | 3 | msa            | na      | 309 |
| YDR264C | AKR1    | 4 | msa            | na      | 111 |
| YDR265W | PEX10   | 1 | unassigned     | na      | 101 |
| YDR265W | PEX10   | 2 | psiblast       | 1fbvA_  | 184 |
| YDR265W | PEX10   | 3 | psiblast       | 1fbvA_  | 52  |
| YDR266C | YDR266C | 1 | psiblast       | 1meyC_  | 181 |
| YDR266C | YDR266C | 2 | psiblast       | 2gliA_  | 88  |
| YDR266C | YDR266C | 3 | psiblast       | 2gliA_  | 78  |
| YDR266C | YDR266C | 4 | psiblast       | 1f2iG_  | 126 |
| YDR266C | YDR266C | 5 | unassigned     | na      | 166 |
| YDR267C | YDR267C | 1 | psiblast       | 1erjA_  | 330 |
| YDR268W | MSW1    | 1 | psiblast       | 1lkwA_  | 271 |
| YDR268W | MSW1    | 2 | psiblast       | 1lkwA_  | 108 |
| YDR269C | YDR269C | 1 | unassigned     | na      | 107 |
| YDR270W | CCC2    | 1 | psiblast       | 1fvqA_  | 75  |
| YDR270W | CCC2    | 2 | psiblast       | 1kqkA_  | 88  |
| YDR270W | CCC2    | 3 | fold_recogniti | 1k0vA   | 119 |
| YDR270W | CCC2    | 4 | unassigned     | na      | 53  |

|         |         |    |                |         |     |
|---------|---------|----|----------------|---------|-----|
| YDR270W | CCC2    | 5  | psiblast       | 1eulA_  | 525 |
| YDR270W | CCC2    | 6  | psiblast       | 1eulA_  | 144 |
| YDR271C | YDR271C | 1  | unassigned     | na      | 123 |
| YDR272W | GLO2    | 1  | psiblast       | 1qh3A_  | 120 |
| YDR272W | GLO2    | 2  | psiblast       | 1qh3A_  | 70  |
| YDR272W | GLO2    | 3  | psiblast       | 1qh3A_  | 84  |
| YDR273W | DON1    | 1  | fold_recogniti | 1ej6B   | 231 |
| YDR273W | DON1    | 2  | unassigned     | na      | 134 |
| YDR274C | YDR274C | 1  | unassigned     | na      | 123 |
| YDR275W | BSC2    | 1  | unassigned     | na      | 235 |
| YDR276C | PMP3    | 1  | pfam           | PF01679 | 55  |
| YDR277C | MTH1    | 1  | unassigned     | na      | 433 |
| YDR278C | YDR278C | 1  | unassigned     | na      | 105 |
| YDR279W | RNH202  | 1  | unassigned     | na      | 350 |
| YDR280W | RRP45   | 1  | psiblast       | 1e3pA_  | 114 |
| YDR280W | RRP45   | 2  | psiblast       | 1e3pA_  | 191 |
| YDR281C | PHM6    | 1  | unassigned     | na      | 104 |
| YDR282C | YDR282C | 1  | unassigned     | na      | 90  |
| YDR282C | YDR282C | 2  | pfam           | PF02582 | 324 |
| YDR283C | GCN2    | 1  | msa            | na      | 199 |
| YDR283C | GCN2    | 2  | unassigned     | na      | 64  |
| YDR283C | GCN2    | 3  | psiblast       | 1pme__  | 316 |
| YDR283C | GCN2    | 4  | psiblast       | 1lwpA_  | 123 |
| YDR283C | GCN2    | 5  | psiblast       | 1lwpA_  | 98  |
| YDR283C | GCN2    | 6  | psiblast       | 1lwpA_  | 138 |
| YDR283C | GCN2    | 7  | psiblast       | 1a06__  | 91  |
| YDR283C | GCN2    | 8  | psiblast       | 1httA_  | 296 |
| YDR283C | GCN2    | 9  | psiblast       | 1httA_  | 192 |
| YDR283C | GCN2    | 10 | unassigned     | na      | 142 |
| YDR284C | DPP1    | 1  | unassigned     | na      | 60  |
| YDR284C | DPP1    | 2  | psiblast       | 1d2tA_  | 229 |
| YDR285W | ZIP1    | 1  | psiblast       | 1i84S_  | 321 |
| YDR285W | ZIP1    | 2  | psiblast       | 1c1gA_  | 73  |
| YDR285W | ZIP1    | 3  | unassigned     | na      | 57  |
| YDR285W | ZIP1    | 4  | psiblast       | 2tmaA_  | 71  |
| YDR285W | ZIP1    | 5  | psiblast       | 2tmaA_  | 79  |
| YDR285W | ZIP1    | 6  | psiblast       | 2tmaA_  | 62  |
| YDR285W | ZIP1    | 7  | psiblast       | 2tmaA_  | 104 |
| YDR285W | ZIP1    | 8  | msa            | na      | 108 |
| YDR286C | YDR286C | 1  | unassigned     | na      | 114 |
| YDR287W | YDR287W | 1  | psiblast       | 1imaA_  | 148 |
| YDR287W | YDR287W | 2  | psiblast       | 1imaA_  | 144 |
| YDR288W | YDR288W | 1  | fold_recogniti | 1dgsA   | 129 |
| YDR288W | YDR288W | 2  | unassigned     | na      | 174 |
| YDR289C | RTT103  | 1  | msa            | na      | 115 |
| YDR289C | RTT103  | 2  | fold_recogniti | 1l8mA   | 72  |
| YDR289C | RTT103  | 3  | fold_recogniti | 1l8mA   | 79  |
| YDR289C | RTT103  | 4  | fold_recogniti | 1l8mA   | 66  |



|         |         |   |                |         |     |
|---------|---------|---|----------------|---------|-----|
| YDR289C | RTT103  | 5 | fold_recogniti | 118mA   | 77  |
| YDR290W | SWS1    | 1 | unassigned     | na      | 109 |
| YDR291W | YDR291W | 1 | msa            | na      | 255 |
| YDR291W | YDR291W | 2 | psiblast       | 1fuuA_  | 477 |
| YDR291W | YDR291W | 3 | msa            | na      | 151 |
| YDR291W | YDR291W | 4 | msa            | na      | 194 |
| YDR292C | SRP101  | 1 | msa            | na      | 215 |
| YDR292C | SRP101  | 2 | unassigned     | na      | 57  |
| YDR292C | SRP101  | 3 | psiblast       | 1fts__  | 280 |
| YDR292C | SRP101  | 4 | psiblast       | 1fts__  | 69  |
| YDR293C | SSD1    | 1 | psiblast       | 1deqA_  | 222 |
| YDR293C | SSD1    | 2 | msa            | na      | 157 |
| YDR293C | SSD1    | 3 | unassigned     | na      | 195 |
| YDR293C | SSD1    | 4 | msa            | na      | 494 |
| YDR293C | SSD1    | 5 | psiblast       | 1go3E_  | 96  |
| YDR293C | SSD1    | 6 | unassigned     | na      | 86  |
| YDR294C | DPL1    | 1 | unassigned     | na      | 79  |
| YDR294C | DPL1    | 2 | psiblast       | 1js3A_  | 83  |
| YDR294C | DPL1    | 3 | psiblast       | 1js3A_  | 427 |
| YDR295C | HDA2    | 1 | unassigned     | na      | 59  |
| YDR295C | HDA2    | 2 | psiblast       | 1i84S_  | 332 |
| YDR295C | HDA2    | 3 | psiblast       | 1c1gA_  | 107 |
| YDR295C | HDA2    | 4 | msa            | na      | 176 |
| YDR296W | MHR1    | 1 | unassigned     | na      | 226 |
| YDR297W | SUR2    | 1 | pfam           | PF01598 | 349 |
| YDR298C | ATP5    | 1 | psiblast       | 1abv__  | 212 |
| YDR299W | BFR2    | 1 | fold_recogniti | 1c1gB   | 534 |
| YDR300C | PRO1    | 1 | psiblast       | 1e19A_  | 292 |
| YDR300C | PRO1    | 2 | pfam           | PF01472 | 136 |
| YDR301W | CFT1    | 1 | msa            | na      | 722 |
| YDR301W | CFT1    | 2 | unassigned     | na      | 264 |
| YDR301W | CFT1    | 3 | pfam           | PF03178 | 371 |
| YDR302W | GPI11   | 1 | msa            | na      | 120 |
| YDR302W | GPI11   | 2 | msa            | na      | 99  |
| YDR303C | RSC3    | 1 | psiblast       | 1cld__  | 52  |
| YDR303C | RSC3    | 2 | msa            | na      | 149 |
| YDR303C | RSC3    | 3 | unassigned     | na      | 354 |
| YDR303C | RSC3    | 4 | msa            | na      | 330 |
| YDR304C | CPR5    | 1 | psiblast       | 1cynA_  | 225 |
| YDR305C | HNT2    | 1 | psiblast       | 1fhi__  | 160 |
| YDR305C | HNT2    | 2 | unassigned     | na      | 57  |
| YDR306C | YDR306C | 1 | unassigned     | na      | 478 |
| YDR307W | YDR307W | 1 | msa            | na      | 270 |
| YDR307W | YDR307W | 2 | pfam           | PF02815 | 83  |
| YDR307W | YDR307W | 3 | pfam           | PF02815 | 73  |
| YDR307W | YDR307W | 4 | pfam           | PF02815 | 71  |
| YDR307W | YDR307W | 5 | unassigned     | na      | 66  |
| YDR307W | YDR307W | 6 | msa            | na      | 99  |

|           |         |   |                |         |     |
|-----------|---------|---|----------------|---------|-----|
| YDR308C   | SRB7    | 1 | psiblast       | 1i84S_  | 140 |
| YDR309C   | GIC2    | 1 | unassigned     | na      | 100 |
| YDR309C   | GIC2    | 2 | pfam           | PF00786 | 100 |
| YDR309C   | GIC2    | 3 | unassigned     | na      | 183 |
| YDR310C   | SUM1    | 1 | unassigned     | na      | 189 |
| YDR310C   | SUM1    | 2 | msa            | na      | 222 |
| YDR310C   | SUM1    | 3 | unassigned     | na      | 651 |
| YDR311W   | TFB1    | 1 | unassigned     | na      | 156 |
| YDR311W   | TFB1    | 2 | pfam           | PF03909 | 82  |
| YDR311W   | TFB1    | 3 | pfam           | PF03909 | 114 |
| YDR311W   | TFB1    | 4 | unassigned     | na      | 290 |
| YDR312W   | SSF2    | 1 | pfam           | PF03877 | 290 |
| YDR312W   | SSF2    | 2 | unassigned     | na      | 82  |
| YDR312W   | SSF2    | 3 | msa            | na      | 81  |
| YDR313C   | PIB1    | 1 | psiblast       | 1jocA_  | 89  |
| YDR313C   | PIB1    | 2 | unassigned     | na      | 70  |
| YDR313C   | PIB1    | 3 | psiblast       | 1chc__  | 127 |
| YDR314C   | YDR314C | 1 | unassigned     | na      | 269 |
| YDR314C   | YDR314C | 2 | pfam           | PF03835 | 423 |
| YDR315C   | IPK1    | 1 | unassigned     | na      | 281 |
| YDR316W   | OMS1    | 1 | unassigned     | na      | 146 |
| YDR316W   | OMS1    | 2 | psiblast       | 1kpiA_  | 325 |
| YDR317W   | YDR317W | 1 | unassigned     | na      | 414 |
| YDR318W   | MCM21   | 1 | unassigned     | na      | 251 |
| YDR319C   | YDR319C | 1 | unassigned     | na      | 170 |
| YDR319C   | YDR319C | 2 | msa            | na      | 104 |
| YDR320C   | SWA2    | 1 | unassigned     | na      | 352 |
| YDR320C   | SWA2    | 2 | psiblast       | 1elwA_  | 191 |
| YDR320C   | SWA2    | 3 | unassigned     | na      | 55  |
| YDR320C   | SWA2    | 4 | psiblast       | 1xbl__  | 70  |
| YDR320C-A | DAD4    | 1 | unassigned     | na      | 72  |
| YDR321W   | ASP1    | 1 | psiblast       | 1hfjA_  | 264 |
| YDR321W   | ASP1    | 2 | psiblast       | 1hfjA_  | 117 |
| YDR322C-A | TIM11   | 1 | unassigned     | na      | 96  |
| YDR322W   | MRPL35  | 1 | unassigned     | na      | 135 |
| YDR322W   | MRPL35  | 2 | psiblast       | 1kn3A_  | 232 |
| YDR323C   | PEP7    | 1 | fold_recogniti | 1dvpA   | 158 |
| YDR323C   | PEP7    | 2 | psiblast       | 1vfyA_  | 149 |
| YDR323C   | PEP7    | 3 | msa            | na      | 208 |
| YDR324C   | UTP4    | 1 | unassigned     | na      | 73  |
| YDR324C   | UTP4    | 2 | psiblast       | 1gg2B_  | 93  |
| YDR324C   | UTP4    | 3 | psiblast       | 1erjA_  | 338 |
| YDR324C   | UTP4    | 4 | msa            | na      | 188 |
| YDR324C   | UTP4    | 5 | unassigned     | na      | 84  |
| YDR325W   | YCG1    | 1 | msa            | na      | 537 |
| YDR325W   | YCG1    | 2 | unassigned     | na      | 300 |
| YDR325W   | YCG1    | 3 | msa            | na      | 214 |
| YDR326C   | YDR326C | 1 | unassigned     | na      | 469 |

|         |         |   |                |         |     |
|---------|---------|---|----------------|---------|-----|
| YDR326C | YDR326C | 2 | msa            | na      | 152 |
| YDR326C | YDR326C | 3 | pfam           | PF02893 | 149 |
| YDR326C | YDR326C | 4 | unassigned     | na      | 59  |
| YDR326C | YDR326C | 5 | msa            | na      | 87  |
| YDR326C | YDR326C | 6 | unassigned     | na      | 88  |
| YDR326C | YDR326C | 7 | msa            | na      | 259 |
| YDR326C | YDR326C | 8 | unassigned     | na      | 175 |
| YDR327W | YDR327W | 1 | unassigned     | na      | 108 |
| YDR328C | SKP1    | 1 | psiblast       | 1fqvB_  | 194 |
| YDR329C | PEX3    | 1 | unassigned     | na      | 121 |
| YDR329C | PEX3    | 2 | msa            | na      | 320 |
| YDR330W | UBX5    | 1 | unassigned     | na      | 202 |
| YDR330W | UBX5    | 2 | msa            | na      | 152 |
| YDR330W | UBX5    | 3 | psiblast       | 1jruA_  | 146 |
| YDR331W | GPI8    | 1 | pfam           | PF01650 | 358 |
| YDR331W | GPI8    | 2 | unassigned     | na      | 53  |
| YDR332W | YDR332W | 1 | psiblast       | 1fuuA_  | 410 |
| YDR332W | YDR332W | 2 | psiblast       | 1d9xA_  | 113 |
| YDR332W | YDR332W | 3 | unassigned     | na      | 166 |
| YDR333C | YDR333C | 1 | msa            | na      | 298 |
| YDR333C | YDR333C | 2 | unassigned     | na      | 55  |
| YDR333C | YDR333C | 3 | fold_recogniti | 1fchA   | 124 |
| YDR333C | YDR333C | 4 | fold_recogniti | 1fchA   | 131 |
| YDR333C | YDR333C | 5 | unassigned     | na      | 115 |
| YDR334W | SWR1    | 1 | psiblast       | 1i84S_  | 346 |
| YDR334W | SWR1    | 2 | unassigned     | na      | 286 |
| YDR334W | SWR1    | 3 | pfam           | PF00176 | 373 |
| YDR334W | SWR1    | 4 | unassigned     | na      | 232 |
| YDR334W | SWR1    | 5 | pfam           | PF00271 | 123 |
| YDR334W | SWR1    | 6 | msa            | na      | 154 |
| YDR335W | MSN5    | 1 | psiblast       | 1ibrB_  | 253 |
| YDR335W | MSN5    | 2 | msa            | na      | 140 |
| YDR335W | MSN5    | 3 | msa            | na      | 88  |
| YDR335W | MSN5    | 4 | msa            | na      | 166 |
| YDR335W | MSN5    | 5 | msa            | na      | 484 |
| YDR335W | MSN5    | 6 | msa            | na      | 93  |
| YDR336W | YDR336W | 1 | msa            | na      | 122 |
| YDR336W | YDR336W | 2 | psiblast       | 1egaA_  | 192 |
| YDR337W | MRPS28  | 1 | unassigned     | na      | 132 |
| YDR337W | MRPS28  | 2 | psiblast       | 1egOF_  | 154 |
| YDR338C | YDR338C | 1 | unassigned     | na      | 200 |
| YDR338C | YDR338C | 2 | fold_recogniti | 1b3uA   | 143 |
| YDR338C | YDR338C | 3 | fold_recogniti | 1b3uA   | 169 |
| YDR338C | YDR338C | 4 | fold_recogniti | 1b3uA   | 183 |
| YDR339C | YDR339C | 1 | unassigned     | na      | 189 |
| YDR340W | YDR340W | 1 | unassigned     | na      | 100 |
| YDR341C | YDR341C | 1 | psiblast       | 1bs2A_  | 115 |
| YDR341C | YDR341C | 2 | psiblast       | 1bs2A_  | 214 |

|         |         |   |                |        |     |
|---------|---------|---|----------------|--------|-----|
| YDR341C | YDR341C | 3 | psiblast       | 1bs2A_ | 198 |
| YDR341C | YDR341C | 4 | psiblast       | 1bs2A_ | 80  |
| YDR342C | HXT7    | 1 | psiblast       | 1ja5A_ | 469 |
| YDR342C | HXT7    | 2 | psiblast       | 1ja5A_ | 101 |
| YDR343C | HXT6    | 1 | psiblast       | 1ja5A_ | 469 |
| YDR343C | HXT6    | 2 | psiblast       | 1ja5A_ | 101 |
| YDR344C | YDR344C | 1 | unassigned     | na     | 147 |
| YDR345C | HXT3    | 1 | psiblast       | 1ja5A_ | 466 |
| YDR345C | HXT3    | 2 | psiblast       | 1ja5A_ | 101 |
| YDR346C | SVF1    | 1 | msa            | na     | 203 |
| YDR346C | SVF1    | 2 | unassigned     | na     | 278 |
| YDR347W | MRP1    | 1 | psiblast       | 3mdsA_ | 90  |
| YDR347W | MRP1    | 2 | psiblast       | 3mdsA_ | 151 |
| YDR347W | MRP1    | 3 | psiblast       | 1lusA_ | 80  |
| YDR348C | YDR348C | 1 | unassigned     | na     | 77  |
| YDR348C | YDR348C | 2 | msa            | na     | 122 |
| YDR348C | YDR348C | 3 | msa            | na     | 207 |
| YDR348C | YDR348C | 4 | unassigned     | na     | 93  |
| YDR349C | YPS7    | 1 | psiblast       | 1j71A_ | 344 |
| YDR349C | YPS7    | 2 | psiblast       | 1j71A_ | 170 |
| YDR349C | YPS7    | 3 | unassigned     | na     | 82  |
| YDR350C | TCM10   | 1 | unassigned     | na     | 611 |
| YDR351W | SBE2    | 1 | unassigned     | na     | 864 |
| YDR352W | YDR352W | 1 | msa            | na     | 135 |
| YDR352W | YDR352W | 2 | msa            | na     | 182 |
| YDR353W | TRR1    | 1 | psiblast       | 1vdc__ | 193 |
| YDR353W | TRR1    | 2 | psiblast       | 1vdc__ | 126 |
| YDR354W | TRP4    | 1 | psiblast       | 1brwA_ | 117 |
| YDR354W | TRP4    | 2 | psiblast       | 1brwA_ | 263 |
| YDR355C | YDR355C | 1 | unassigned     | na     | 100 |
| YDR356W | SPC110  | 1 | unassigned     | na     | 77  |
| YDR356W | SPC110  | 2 | psiblast       | 1i84S_ | 332 |
| YDR356W | SPC110  | 3 | psiblast       | 2tmaA_ | 69  |
| YDR356W | SPC110  | 4 | fold_recogniti | 1hciA  | 171 |
| YDR356W | SPC110  | 5 | fold_recogniti | 1hciA  | 198 |
| YDR356W | SPC110  | 6 | unassigned     | na     | 97  |
| YDR357C | YDR357C | 1 | unassigned     | na     | 122 |
| YDR358W | GGA1    | 1 | psiblast       | 1dvpA_ | 93  |
| YDR358W | GGA1    | 2 | psiblast       | 1dvpA_ | 94  |
| YDR358W | GGA1    | 3 | fold_recogniti | 1vsgA  | 174 |
| YDR358W | GGA1    | 4 | fold_recogniti | 1vsgA  | 48  |
| YDR358W | GGA1    | 5 | psiblast       | 1iu1A_ | 148 |
| YDR359C | VID21   | 1 | unassigned     | na     | 259 |
| YDR359C | VID21   | 2 | msa            | na     | 147 |
| YDR359C | VID21   | 3 | unassigned     | na     | 173 |
| YDR359C | VID21   | 4 | msa            | na     | 261 |
| YDR359C | VID21   | 5 | unassigned     | na     | 119 |
| YDR360W | YDR360W | 1 | unassigned     | na     | 128 |

|           |           |                  |         |     |
|-----------|-----------|------------------|---------|-----|
| YDR361C   | BCP1      | 1 unassigned     | na      | 81  |
| YDR361C   | BCP1      | 2 msa            | na      | 202 |
| YDR362C   | TFC6      | 1 unassigned     | na      | 306 |
| YDR362C   | TFC6      | 2 fold_recogniti | 1erjA   | 366 |
| YDR363W   | ESC2      | 1 unassigned     | na      | 346 |
| YDR363W   | ESC2      | 2 psiblast       | 1a5r__  | 110 |
| YDR363W-A | SEM1      | 1 fold_recogniti | 1iyjA   | 89  |
| YDR364C   | CDC40     | 1 msa            | na      | 124 |
| YDR364C   | CDC40     | 2 psiblast       | 1erjA_  | 331 |
| YDR365C   | ESF1      | 1 msa            | na      | 206 |
| YDR365C   | ESF1      | 2 unassigned     | na      | 92  |
| YDR365C   | ESF1      | 3 msa            | na      | 206 |
| YDR365C   | ESF1      | 4 unassigned     | na      | 124 |
| YDR366C   | YDR366C   | 1 unassigned     | na      | 132 |
| YDR367W   | YDR367W   | 1 unassigned     | na      | 221 |
| YDR368W   | YPR1      | 1 psiblast       | 2alr__  | 312 |
| YDR369C   | XRS2      | 1 pfam           | PF00498 | 157 |
| YDR369C   | XRS2      | 2 unassigned     | na      | 330 |
| YDR369C   | XRS2      | 3 msa            | na      | 367 |
| YDR370C   | YDR370C   | 1 unassigned     | na      | 442 |
| YDR371W   | CTS2      | 1 unassigned     | na      | 69  |
| YDR371W   | CTS2      | 2 psiblast       | 1d2kA_  | 100 |
| YDR371W   | CTS2      | 3 psiblast       | 1d2kA_  | 342 |
| YDR372C   | VPS74     | 1 unassigned     | na      | 64  |
| YDR372C   | VPS74     | 2 msa            | na      | 281 |
| YDR373W   | FRQ1      | 1 psiblast       | 1fpwA_  | 94  |
| YDR373W   | FRQ1      | 2 psiblast       | 1fpwA_  | 96  |
| YDR374C   | YDR374C   | 1 unassigned     | na      | 74  |
| YDR374C   | YDR374C   | 2 msa            | na      | 232 |
| YDR375C   | BCS1      | 1 unassigned     | na      | 166 |
| YDR375C   | BCS1      | 2 psiblast       | 1e32A_  | 222 |
| YDR375C   | BCS1      | 3 psiblast       | 1e32A_  | 68  |
| YDR376W   | ARH1      | 1 psiblast       | 1cjcA_  | 239 |
| YDR376W   | ARH1      | 2 psiblast       | 1cjcA_  | 254 |
| YDR377W   | ATP17     | 1 unassigned     | na      | 101 |
| YDR378C   | LSM6      | 1 psiblast       | 1i81A_  | 123 |
| YDR379C-A | YDR379C-A | 1 unassigned     | na      | 79  |
| YDR379W   | RGA2      | 1 psiblast       | 1b8tA_  | 70  |
| YDR379W   | RGA2      | 2 psiblast       | 1b8tA_  | 79  |
| YDR379W   | RGA2      | 3 psiblast       | 1bw5__  | 76  |
| YDR379W   | RGA2      | 4 msa            | na      | 355 |
| YDR379W   | RGA2      | 5 unassigned     | na      | 145 |
| YDR379W   | RGA2      | 6 psiblast       | 1rgp__  | 154 |
| YDR379W   | RGA2      | 7 psiblast       | 1rgp__  | 130 |
| YDR380W   | ARO10     | 1 psiblast       | 1qpbA_  | 227 |
| YDR380W   | ARO10     | 2 psiblast       | 1qpbA_  | 176 |
| YDR380W   | ARO10     | 3 psiblast       | 1qpbA_  | 232 |
| YDR381C-A | YDR381C-A | 1 unassigned     | na      | 11  |

|         |         |   |                |         |     |
|---------|---------|---|----------------|---------|-----|
| YDR381W | YRA1    | 1 | psiblast       | 1I3kA_  | 67  |
| YDR381W | YRA1    | 2 | psiblast       | 1I3kA_  | 159 |
| YDR382W | RPP2B   | 1 | pfam           | PF00428 | 110 |
| YDR383C | NKP1    | 1 | unassigned     | na      | 252 |
| YDR384C | ATO3    | 1 | unassigned     | na      | 70  |
| YDR384C | ATO3    | 2 | pfam           | PF01184 | 205 |
| YDR385W | EFT2    | 1 | psiblast       | 1dar__  | 349 |
| YDR385W | EFT2    | 2 | psiblast       | 1dar__  | 167 |
| YDR385W | EFT2    | 3 | psiblast       | 1dar__  | 326 |
| YDR386W | MUS81   | 1 | msa            | na      | 226 |
| YDR386W | MUS81   | 2 | unassigned     | na      | 108 |
| YDR386W | MUS81   | 3 | pfam           | PF02732 | 120 |
| YDR386W | MUS81   | 4 | msa            | na      | 178 |
| YDR387C | YDR387C | 1 | psiblast       | 1ja5A_  | 486 |
| YDR387C | YDR387C | 2 | psiblast       | 1ja5A_  | 69  |
| YDR388W | RVS167  | 1 | psiblast       | 1i84S_  | 257 |
| YDR388W | RVS167  | 2 | fold_recogniti | 1m2vB   | 168 |
| YDR388W | RVS167  | 3 | psiblast       | 2semA_  | 57  |
| YDR389W | SAC7    | 1 | unassigned     | na      | 68  |
| YDR389W | SAC7    | 2 | psiblast       | 1rgp__  | 153 |
| YDR389W | SAC7    | 3 | psiblast       | 1rgp__  | 103 |
| YDR389W | SAC7    | 4 | fold_recogniti | 1pbwA   | 110 |
| YDR389W | SAC7    | 5 | unassigned     | na      | 220 |
| YDR390C | UBA2    | 1 | psiblast       | 1jw9B_  | 273 |
| YDR390C | UBA2    | 2 | unassigned     | na      | 57  |
| YDR390C | UBA2    | 3 | pfam           | PF02134 | 176 |
| YDR390C | UBA2    | 4 | msa            | na      | 130 |
| YDR391C | YDR391C | 1 | unassigned     | na      | 109 |
| YDR391C | YDR391C | 2 | psiblast       | 1cjwA_  | 123 |
| YDR392W | SPT3    | 1 | psiblast       | 1bh8A_  | 50  |
| YDR392W | SPT3    | 2 | pfam           | PF02269 | 59  |
| YDR392W | SPT3    | 3 | unassigned     | na      | 228 |
| YDR393W | SHE9    | 1 | psiblast       | 1i84S_  | 349 |
| YDR393W | SHE9    | 2 | psiblast       | 1c1gA_  | 107 |
| YDR394W | RPT3    | 1 | msa            | na      | 140 |
| YDR394W | RPT3    | 2 | psiblast       | 1e32A_  | 203 |
| YDR394W | RPT3    | 3 | psiblast       | 1e32A_  | 85  |
| YDR395W | SXM1    | 1 | psiblast       | 1qgkA_  | 254 |
| YDR395W | SXM1    | 2 | psiblast       | 1qgkA_  | 230 |
| YDR395W | SXM1    | 3 | psiblast       | 1qgkA_  | 121 |
| YDR395W | SXM1    | 4 | psiblast       | 1qgkA_  | 190 |
| YDR395W | SXM1    | 5 | msa            | na      | 149 |
| YDR396W | YDR396W | 1 | unassigned     | na      | 166 |
| YDR397C | NCB2    | 1 | psiblast       | 1jfiB_  | 78  |
| YDR397C | NCB2    | 2 | psiblast       | 1jfiB_  | 68  |
| YDR398W | UTP5    | 1 | psiblast       | 1erjA_  | 365 |
| YDR398W | UTP5    | 2 | msa            | na      | 198 |
| YDR398W | UTP5    | 3 | msa            | na      | 80  |

|         |         |   |                |         |     |
|---------|---------|---|----------------|---------|-----|
| YDR399W | HPT1    | 1 | psiblast       | 1bzyA_  | 221 |
| YDR400W | URH1    | 1 | psiblast       | 1ezrA_  | 378 |
| YDR401W | YDR401W | 1 | unassigned     | na      | 187 |
| YDR402C | DIT2    | 1 | psiblast       | 2c17A_  | 489 |
| YDR403W | DIT1    | 1 | unassigned     | na      | 156 |
| YDR403W | DIT1    | 2 | msa            | na      | 380 |
| YDR404C | RPB7    | 1 | psiblast       | 1go3E_  | 79  |
| YDR404C | RPB7    | 2 | psiblast       | 1go3E_  | 92  |
| YDR405W | MRP20   | 1 | unassigned     | na      | 80  |
| YDR405W | MRP20   | 2 | psiblast       | 1lnrR_  | 102 |
| YDR405W | MRP20   | 3 | unassigned     | na      | 81  |
| YDR406W | PDR15   | 1 | unassigned     | na      | 151 |
| YDR406W | PDR15   | 2 | psiblast       | 1f3oA_  | 93  |
| YDR406W | PDR15   | 3 | psiblast       | 1f3oA_  | 201 |
| YDR406W | PDR15   | 4 | unassigned     | na      | 62  |
| YDR406W | PDR15   | 5 | psiblast       | 1jsqA_  | 335 |
| YDR406W | PDR15   | 6 | psiblast       | 1jsqA_  | 292 |
| YDR406W | PDR15   | 7 | msa            | na      | 303 |
| YDR406W | PDR15   | 8 | unassigned     | na      | 92  |
| YDR407C | TRS120  | 1 | unassigned     | na      | 204 |
| YDR407C | TRS120  | 2 | msa            | na      | 788 |
| YDR407C | TRS120  | 3 | unassigned     | na      | 297 |
| YDR408C | ADE8    | 1 | psiblast       | 1c3eA_  | 114 |
| YDR408C | ADE8    | 2 | psiblast       | 1c3eA_  | 100 |
| YDR409W | SIZ1    | 1 | pfam           | PF02037 | 106 |
| YDR409W | SIZ1    | 2 | msa            | na      | 113 |
| YDR409W | SIZ1    | 3 | unassigned     | na      | 70  |
| YDR409W | SIZ1    | 4 | pfam           | PF02891 | 121 |
| YDR409W | SIZ1    | 5 | msa            | na      | 119 |
| YDR409W | SIZ1    | 6 | fold_recogniti | 1i3qA   | 375 |
| YDR410C | STE14   | 1 | unassigned     | na      | 72  |
| YDR410C | STE14   | 2 | msa            | na      | 167 |
| YDR411C | YDR411C | 1 | msa            | na      | 267 |
| YDR411C | YDR411C | 2 | unassigned     | na      | 74  |
| YDR412W | YDR412W | 1 | msa            | na      | 85  |
| YDR412W | YDR412W | 2 | msa            | na      | 150 |
| YDR413C | YDR413C | 1 | fold_recogniti | 1brrB   | 116 |
| YDR413C | YDR413C | 2 | unassigned     | na      | 75  |
| YDR414C | ERD1    | 1 | unassigned     | na      | 152 |
| YDR414C | ERD1    | 2 | pfam           | PF03124 | 210 |
| YDR415C | YDR415C | 1 | unassigned     | na      | 79  |
| YDR415C | YDR415C | 2 | psiblast       | 1amp__  | 295 |
| YDR416W | SYF1    | 1 | fold_recogniti | 1jcqA   | 161 |
| YDR416W | SYF1    | 2 | fold_recogniti | 1jcqA   | 93  |
| YDR416W | SYF1    | 3 | fold_recogniti | 1jcqA   | 118 |
| YDR416W | SYF1    | 4 | psiblast       | 1fchA_  | 161 |
| YDR416W | SYF1    | 5 | psiblast       | 1fchA_  | 66  |
| YDR416W | SYF1    | 6 | psiblast       | 1fchA_  | 58  |

|         |         |   |                |        |      |
|---------|---------|---|----------------|--------|------|
| YDR416W | SYF1    | 7 | fold_recogniti | 1fchA  | 99   |
| YDR416W | SYF1    | 8 | fold_recogniti | 1fchA  | 103  |
| YDR417C | YDR417C | 1 | unassigned     | na     | 123  |
| YDR418W | RPL12B  | 1 | psiblast       | 1k5yK_ | 74   |
| YDR418W | RPL12B  | 2 | psiblast       | 1k5yK_ | 91   |
| YDR419W | RAD30   | 1 | psiblast       | 1jihA_ | 211  |
| YDR419W | RAD30   | 2 | psiblast       | 1jihA_ | 177  |
| YDR419W | RAD30   | 3 | psiblast       | 1jihA_ | 142  |
| YDR419W | RAD30   | 4 | unassigned     | na     | 102  |
| YDR420W | HKR1    | 1 | msa            | na     | 1028 |
| YDR420W | HKR1    | 2 | msa            | na     | 405  |
| YDR420W | HKR1    | 3 | unassigned     | na     | 369  |
| YDR421W | ARO80   | 1 | fold_recogniti | 1d66A  | 89   |
| YDR421W | ARO80   | 2 | unassigned     | na     | 861  |
| YDR422C | SIP1    | 1 | unassigned     | na     | 483  |
| YDR422C | SIP1    | 2 | msa            | na     | 194  |
| YDR422C | SIP1    | 3 | msa            | na     | 186  |
| YDR423C | CAD1    | 1 | psiblast       | 1gd2E_ | 133  |
| YDR423C | CAD1    | 2 | msa            | na     | 127  |
| YDR423C | CAD1    | 3 | unassigned     | na     | 66   |
| YDR423C | CAD1    | 4 | msa            | na     | 83   |
| YDR424C | DYN2    | 1 | psiblast       | 1f3cA_ | 92   |
| YDR425W | SNX41   | 1 | psiblast       | 1almA_ | 125  |
| YDR425W | SNX41   | 2 | psiblast       | 1i84S_ | 341  |
| YDR425W | SNX41   | 3 | psiblast       | 1c1gA_ | 159  |
| YDR426C | YDR426C | 1 | unassigned     | na     | 125  |
| YDR427W | RPN9    | 1 | fold_recogniti | 1hz4A  | 133  |
| YDR427W | RPN9    | 2 | fold_recogniti | 1hz4A  | 118  |
| YDR427W | RPN9    | 3 | fold_recogniti | 1hz4A  | 142  |
| YDR428C | YDR428C | 1 | psiblast       | 1evqA_ | 261  |
| YDR429C | TIF35   | 1 | unassigned     | na     | 64   |
| YDR429C | TIF35   | 2 | psiblast       | 1b7fA_ | 119  |
| YDR429C | TIF35   | 3 | psiblast       | 1b7fA_ | 91   |
| YDR430C | CYM1    | 1 | psiblast       | 1bccA_ | 294  |
| YDR430C | CYM1    | 2 | psiblast       | 1bccA_ | 238  |
| YDR430C | CYM1    | 3 | psiblast       | 1ezvB_ | 236  |
| YDR430C | CYM1    | 4 | psiblast       | 1ezvB_ | 148  |
| YDR430C | CYM1    | 5 | unassigned     | na     | 73   |
| YDR431W | YDR431W | 1 | unassigned     | na     | 103  |
| YDR432W | NPL3    | 1 | fold_recogniti | 1ldvA  | 124  |
| YDR432W | NPL3    | 2 | psiblast       | 1b7fA_ | 71   |
| YDR432W | NPL3    | 3 | psiblast       | 1b7fA_ | 79   |
| YDR432W | NPL3    | 4 | fold_recogniti | 1deqA  | 140  |
| YDR433W | YDR433W | 1 | unassigned     | na     | 146  |
| YDR434W | GPI17   | 1 | msa            | na     | 168  |
| YDR434W | GPI17   | 2 | unassigned     | na     | 142  |
| YDR434W | GPI17   | 3 | msa            | na     | 224  |
| YDR435C | PPM1    | 1 | msa            | na     | 256  |



|         |         |   |                |         |      |
|---------|---------|---|----------------|---------|------|
| YDR435C | PPM1    | 2 | unassigned     | na      | 72   |
| YDR436W | PPZ2    | 1 | fold_recogniti | 1i3qA   | 326  |
| YDR436W | PPZ2    | 2 | unassigned     | na      | 63   |
| YDR436W | PPZ2    | 3 | psiblast       | 1it6A_  | 321  |
| YDR437W | YDR437W | 1 | fold_recogniti | 1fnuA   | 140  |
| YDR438W | YDR438W | 1 | pfam           | PF00892 | 199  |
| YDR438W | YDR438W | 2 | msa            | na      | 171  |
| YDR439W | LRS4    | 1 | unassigned     | na      | 347  |
| YDR440W | DOT1    | 1 | unassigned     | na      | 174  |
| YDR440W | DOT1    | 2 | msa            | na      | 153  |
| YDR440W | DOT1    | 3 | unassigned     | na      | 64   |
| YDR440W | DOT1    | 4 | psiblast       | 1m0rA_  | 120  |
| YDR440W | DOT1    | 5 | unassigned     | na      | 71   |
| YDR441C | APT2    | 1 | psiblast       | 1g2pA_  | 181  |
| YDR442W | YDR442W | 1 | unassigned     | na      | 130  |
| YDR443C | SSN2    | 1 | unassigned     | na      | 1420 |
| YDR444W | YDR444W | 1 | unassigned     | na      | 165  |
| YDR444W | YDR444W | 2 | psiblast       | 1eh5A_  | 286  |
| YDR444W | YDR444W | 3 | unassigned     | na      | 236  |
| YDR445C | YDR445C | 1 | unassigned     | na      | 135  |
| YDR446W | ECM11   | 1 | unassigned     | na      | 302  |
| YDR447C | RPS17B  | 1 | pfam           | PF00833 | 136  |
| YDR448W | ADA2    | 1 | pfam           | PF00569 | 40   |
| YDR448W | ADA2    | 2 | fold_recogniti | 1h88C   | 69   |
| YDR448W | ADA2    | 3 | psiblast       | 1i84S_  | 245  |
| YDR448W | ADA2    | 4 | msa            | na      | 80   |
| YDR449C | UTP6    | 1 | psiblast       | 1fchA_  | 64   |
| YDR449C | UTP6    | 2 | psiblast       | 1fchA_  | 60   |
| YDR449C | UTP6    | 3 | psiblast       | 1fchA_  | 97   |
| YDR449C | UTP6    | 4 | unassigned     | na      | 68   |
| YDR449C | UTP6    | 5 | fold_recogniti | 1bn7A   | 151  |
| YDR450W | RPS18A  | 1 | psiblast       | 1k5xM_  | 146  |
| YDR451C | YHP1    | 1 | msa            | na      | 157  |
| YDR451C | YHP1    | 2 | psiblast       | 1fjIA_  | 85   |
| YDR451C | YHP1    | 3 | msa            | na      | 111  |
| YDR452W | PPN1    | 1 | fold_recogniti | 1qhwA   | 394  |
| YDR452W | PPN1    | 2 | unassigned     | na      | 280  |
| YDR453C | TSA2    | 1 | psiblast       | 1qmvA_  | 196  |
| YDR454C | GUK1    | 1 | psiblast       | 1ex6A_  | 135  |
| YDR454C | GUK1    | 2 | psiblast       | 1ex6A_  | 52   |
| YDR455C | YDR455C | 1 | unassigned     | na      | 102  |
| YDR456W | NHX1    | 1 | pfam           | PF00999 | 506  |
| YDR456W | NHX1    | 2 | unassigned     | na      | 127  |
| YDR457W | TOM1    | 1 | msa            | na      | 746  |
| YDR457W | TOM1    | 2 | unassigned     | na      | 905  |
| YDR457W | TOM1    | 3 | msa            | na      | 194  |
| YDR457W | TOM1    | 4 | msa            | na      | 325  |
| YDR457W | TOM1    | 5 | unassigned     | na      | 597  |

|         |         |   |                |         |     |
|---------|---------|---|----------------|---------|-----|
| YDR457W | TOM1    | 6 | psiblast       | 1i5hW_  | 106 |
| YDR457W | TOM1    | 7 | psiblast       | 1c4zA_  | 78  |
| YDR457W | TOM1    | 8 | psiblast       | 1c4zA_  | 141 |
| YDR457W | TOM1    | 9 | psiblast       | 1c4zA_  | 176 |
| YDR458C | YDR458C | 1 | psiblast       | 1i84S_  | 254 |
| YDR458C | YDR458C | 2 | unassigned     | na      | 267 |
| YDR458C | YDR458C | 3 | msa            | na      | 142 |
| YDR459C | YDR459C | 1 | unassigned     | na      | 101 |
| YDR459C | YDR459C | 2 | pfam           | PF01529 | 106 |
| YDR459C | YDR459C | 3 | unassigned     | na      | 167 |
| YDR460W | TFB3    | 1 | psiblast       | 1g25A_  | 67  |
| YDR460W | TFB3    | 2 | psiblast       | 1i84S_  | 197 |
| YDR460W | TFB3    | 3 | unassigned     | na      | 57  |
| YDR461W | MFA1    | 1 | unassigned     | na      | 36  |
| YDR462W | MRPL28  | 1 | unassigned     | na      | 147 |
| YDR463W | STP1    | 1 | msa            | na      | 168 |
| YDR463W | STP1    | 2 | psiblast       | 1meyG_  | 102 |
| YDR463W | STP1    | 3 | unassigned     | na      | 53  |
| YDR463W | STP1    | 4 | psiblast       | 1ubdC_  | 152 |
| YDR463W | STP1    | 5 | unassigned     | na      | 102 |
| YDR464W | SPP41   | 1 | msa            | na      | 619 |
| YDR464W | SPP41   | 2 | msa            | na      | 591 |
| YDR464W | SPP41   | 3 | unassigned     | na      | 52  |
| YDR464W | SPP41   | 4 | msa            | na      | 173 |
| YDR465C | RMT2    | 1 | unassigned     | na      | 67  |
| YDR465C | RMT2    | 2 | msa            | na      | 120 |
| YDR465C | RMT2    | 3 | psiblast       | 1khhA_  | 225 |
| YDR466W | PKH3    | 1 | psiblast       | 1cdkA_  | 75  |
| YDR466W | PKH3    | 2 | psiblast       | 1cdkA_  | 193 |
| YDR466W | PKH3    | 3 | psiblast       | 1i84S_  | 137 |
| YDR466W | PKH3    | 4 | psiblast       | 1i84S_  | 239 |
| YDR466W | PKH3    | 5 | fold_recogniti | 1i3qA   | 254 |
| YDR467C | YDR467C | 1 | unassigned     | na      | 108 |
| YDR468C | TLG1    | 1 | psiblast       | 1dn1B_  | 178 |
| YDR468C | TLG1    | 2 | psiblast       | 1dn1B_  | 46  |
| YDR469W | SDC1    | 1 | unassigned     | na      | 175 |
| YDR470C | UGO1    | 1 | unassigned     | na      | 167 |
| YDR470C | UGO1    | 2 | msa            | na      | 335 |
| YDR471W | RPL27B  | 1 | pfam           | PF00467 | 48  |
| YDR471W | RPL27B  | 2 | pfam           | PF01777 | 88  |
| YDR472W | TRS31   | 1 | msa            | na      | 148 |
| YDR472W | TRS31   | 2 | msa            | na      | 135 |
| YDR473C | PRP3    | 1 | unassigned     | na      | 178 |
| YDR473C | PRP3    | 2 | msa            | na      | 173 |
| YDR473C | PRP3    | 3 | unassigned     | na      | 118 |
| YDR474C | 1574    | 1 | unassigned     | na      | 253 |
| YDR474C | 1574    | 2 | fold_recogniti | 1ldvA   | 302 |
| YDR475C | JIP4    | 1 | unassigned     | na      | 155 |

|         |         |   |                |         |     |
|---------|---------|---|----------------|---------|-----|
| YDR476C | YDR476C | 1 | unassigned     | na      | 224 |
| YDR477W | SNF1    | 1 | psiblast       | 1a06__  | 145 |
| YDR477W | SNF1    | 2 | psiblast       | 1a06__  | 192 |
| YDR477W | SNF1    | 3 | psiblast       | 1ahr__  | 83  |
| YDR477W | SNF1    | 4 | psiblast       | 1ahr__  | 79  |
| YDR477W | SNF1    | 5 | unassigned     | na      | 134 |
| YDR478W | SNM1    | 1 | unassigned     | na      | 198 |
| YDR479C | PEX29   | 1 | msa            | na      | 496 |
| YDR479C | PEX29   | 2 | unassigned     | na      | 58  |
| YDR480W | DIG2    | 1 | unassigned     | na      | 323 |
| YDR481C | PHO8    | 1 | psiblast       | 1ew2A_  | 566 |
| YDR482C | CWC21   | 1 | fold_recogniti | 1dkxA   | 135 |
| YDR483W | KRE2    | 1 | pfam           | PF01793 | 442 |
| YDR484W | VPS52   | 1 | fold_recogniti | 1h6oA   | 195 |
| YDR484W | VPS52   | 2 | fold_recogniti | 1h6oA   | 132 |
| YDR484W | VPS52   | 3 | msa            | na      | 314 |
| YDR485C | VPS72   | 1 | fold_recogniti | 1l8mA   | 96  |
| YDR485C | VPS72   | 2 | fold_recogniti | 1l8mA   | 79  |
| YDR485C | VPS72   | 3 | fold_recogniti | 1l8mA   | 70  |
| YDR485C | VPS72   | 4 | fold_recogniti | 1l8mA   | 76  |
| YDR485C | VPS72   | 5 | fold_recogniti | 1ldvA   | 84  |
| YDR485C | VPS72   | 6 | fold_recogniti | 1ei3A   | 333 |
| YDR485C | VPS72   | 7 | unassigned     | na      | 72  |
| YDR486C | VPS60   | 1 | psiblast       | 1i84S_  | 262 |
| YDR487C | RIB3    | 1 | psiblast       | 1k49A_  | 208 |
| YDR488C | PAC11   | 1 | msa            | na      | 140 |
| YDR488C | PAC11   | 2 | psiblast       | 1erjA_  | 393 |
| YDR489W | SLD5    | 1 | fold_recogniti | 1dg3A   | 128 |
| YDR489W | SLD5    | 2 | fold_recogniti | 1dg3A   | 105 |
| YDR489W | SLD5    | 3 | unassigned     | na      | 61  |
| YDR490C | PKH1    | 1 | unassigned     | na      | 72  |
| YDR490C | PKH1    | 2 | psiblast       | 1fotA_  | 191 |
| YDR490C | PKH1    | 3 | psiblast       | 1fotA_  | 220 |
| YDR490C | PKH1    | 4 | psiblast       | 1i84S_  | 213 |
| YDR490C | PKH1    | 5 | unassigned     | na      | 70  |
| YDR491C | YDR491C | 1 | unassigned     | na      | 163 |
| YDR492W | YDR492W | 1 | pfam           | PF03006 | 316 |
| YDR493W | FMP36   | 1 | unassigned     | na      | 123 |
| YDR494W | RSM28   | 1 | msa            | na      | 127 |
| YDR494W | RSM28   | 2 | unassigned     | na      | 161 |
| YDR495C | VPS3    | 1 | unassigned     | na      | 98  |
| YDR495C | VPS3    | 2 | msa            | na      | 628 |
| YDR495C | VPS3    | 3 | unassigned     | na      | 285 |
| YDR496C | PUF6    | 1 | psiblast       | 1ib2A_  | 157 |
| YDR496C | PUF6    | 2 | psiblast       | 1ib2A_  | 100 |
| YDR496C | PUF6    | 3 | psiblast       | 1ib2A_  | 187 |
| YDR496C | PUF6    | 4 | msa            | na      | 212 |
| YDR497C | ITR1    | 1 | unassigned     | na      | 67  |

|         |         |   |                |         |     |
|---------|---------|---|----------------|---------|-----|
| YDR497C | ITR1    | 2 | psiblast       | 1ja5A_  | 416 |
| YDR497C | ITR1    | 3 | psiblast       | 1ja5A_  | 101 |
| YDR498C | SEC20   | 1 | unassigned     | na      | 186 |
| YDR498C | SEC20   | 2 | pfam           | PF03908 | 133 |
| YDR498C | SEC20   | 3 | unassigned     | na      | 64  |
| YDR499W | LCD1    | 1 | unassigned     | na      | 194 |
| YDR499W | LCD1    | 2 | fold_recogniti | 1h6kA   | 90  |
| YDR499W | LCD1    | 3 | fold_recogniti | 1h6kA   | 282 |
| YDR499W | LCD1    | 4 | fold_recogniti | 1qoyA   | 181 |
| YDR500C | RPL37B  | 1 | psiblast       | 1k5yZ_  | 88  |
| YDR501W | PLM2    | 1 | msa            | na      | 233 |
| YDR501W | PLM2    | 2 | unassigned     | na      | 109 |
| YDR501W | PLM2    | 3 | msa            | na      | 179 |
| YDR502C | SAM2    | 1 | psiblast       | 1qm4A_  | 170 |
| YDR502C | SAM2    | 2 | psiblast       | 1qm4A_  | 105 |
| YDR502C | SAM2    | 3 | psiblast       | 1qm4A_  | 109 |
| YDR503C | LPP1    | 1 | unassigned     | na      | 64  |
| YDR503C | LPP1    | 2 | psiblast       | 1d2tA_  | 210 |
| YDR504C | SPG3    | 1 | unassigned     | na      | 127 |
| YDR505C | PSP1    | 1 | unassigned     | na      | 178 |
| YDR505C | PSP1    | 2 | fold_recogniti | 1ruxA   | 210 |
| YDR505C | PSP1    | 3 | fold_recogniti | 1ruxA   | 226 |
| YDR505C | PSP1    | 4 | fold_recogniti | 1iw7D   | 227 |
| YDR506C | YDR506C | 1 | psiblast       | 1hfuA_  | 415 |
| YDR506C | YDR506C | 2 | psiblast       | 1hfuA_  | 193 |
| YDR507C | GIN4    | 1 | psiblast       | 1a06__  | 173 |
| YDR507C | GIN4    | 2 | psiblast       | 1a06__  | 198 |
| YDR507C | GIN4    | 3 | unassigned     | na      | 771 |
| YDR508C | GNP1    | 1 | unassigned     | na      | 121 |
| YDR508C | GNP1    | 2 | pfam           | PF00324 | 542 |
| YDR509W | YDR509W | 1 | unassigned     | na      | 115 |
| YDR510W | SMT3    | 1 | psiblast       | 1l2nA_  | 101 |
| YDR511W | ACN9    | 1 | unassigned     | na      | 133 |
| YDR512C | EMI1    | 1 | unassigned     | na      | 187 |
| YDR513W | TTR1    | 1 | psiblast       | 1kte__  | 143 |
| YDR514C | YDR514C | 1 | unassigned     | na      | 142 |
| YDR514C | YDR514C | 2 | msa            | na      | 283 |
| YDR514C | YDR514C | 3 | unassigned     | na      | 58  |
| YDR515W | SLF1    | 1 | fold_recogniti | 1i3qA   | 257 |
| YDR515W | SLF1    | 2 | msa            | na      | 106 |
| YDR515W | SLF1    | 3 | msa            | na      | 84  |
| YDR516C | EMI2    | 1 | psiblast       | 1ig8A_  | 103 |
| YDR516C | EMI2    | 2 | psiblast       | 1ig8A_  | 397 |
| YDR517W | GRH1    | 1 | msa            | na      | 284 |
| YDR517W | GRH1    | 2 | msa            | na      | 88  |
| YDR518W | EUG1    | 1 | psiblast       | 1mek__  | 146 |
| YDR518W | EUG1    | 2 | psiblast       | 1bjx__  | 109 |
| YDR518W | EUG1    | 3 | msa            | na      | 75  |

|           |           |   |                |         |     |
|-----------|-----------|---|----------------|---------|-----|
| YDR518W   | EUG1      | 4 | psiblast       | 1dbyA_  | 187 |
| YDR519W   | FPR2      | 1 | psiblast       | 1yat__  | 135 |
| YDR520C   | YDR520C   | 1 | psiblast       | 1hwtC_  | 151 |
| YDR520C   | YDR520C   | 2 | unassigned     | na      | 191 |
| YDR520C   | YDR520C   | 3 | fold_recogniti | 1qoyA   | 299 |
| YDR520C   | YDR520C   | 4 | fold_recogniti | 1qoyA   | 40  |
| YDR520C   | YDR520C   | 5 | unassigned     | na      | 91  |
| YDR521W   | YDR521W   | 1 | unassigned     | na      | 111 |
| YDR522C   | SPS2      | 1 | unassigned     | na      | 62  |
| YDR522C   | SPS2      | 2 | psiblast       | 1h6uA_  | 72  |
| YDR522C   | SPS2      | 3 | psiblast       | 1jl5A_  | 316 |
| YDR522C   | SPS2      | 4 | unassigned     | na      | 52  |
| YDR523C   | SPS1      | 1 | psiblast       | 1f3mC_  | 95  |
| YDR523C   | SPS1      | 2 | psiblast       | 1f3mC_  | 210 |
| YDR523C   | SPS1      | 3 | psiblast       | 5tnc__  | 89  |
| YDR523C   | SPS1      | 4 | psiblast       | 5tnc__  | 96  |
| YDR524C   | AGE1      | 1 | psiblast       | 1eazA_  | 152 |
| YDR524C   | AGE1      | 2 | psiblast       | 1dcqA_  | 142 |
| YDR524C   | AGE1      | 3 | psiblast       | 1dcqA_  | 120 |
| YDR524C   | AGE1      | 4 | unassigned     | na      | 68  |
| YDR524C-B | YDR524C-B | 1 | unassigned     | na      | 66  |
| YDR524W-A | YDR524W-A | 1 | unassigned     | na      | 29  |
| YDR525W   | API2      | 1 | unassigned     | na      | 109 |
| YDR525W-A | SNA2      | 1 | pfam           | PF01679 | 79  |
| YDR526C   | YDR526C   | 1 | unassigned     | na      | 156 |
| YDR527W   | RBA50     | 1 | fold_recogniti | 1b3uA   | 138 |
| YDR527W   | RBA50     | 2 | fold_recogniti | 1b3uA   | 151 |
| YDR527W   | RBA50     | 3 | fold_recogniti | 1b3uA   | 150 |
| YDR528W   | HLR1      | 1 | msa            | na      | 308 |
| YDR528W   | HLR1      | 2 | unassigned     | na      | 115 |
| YDR529C   | QCR7      | 1 | psiblast       | 1kyoG_  | 127 |
| YDR530C   | APA2      | 1 | fold_recogniti | 1gupA   | 325 |
| YDR531W   | YDR531W   | 1 | pfam           | PF03630 | 367 |
| YDR532C   | YDR532C   | 1 | unassigned     | na      | 131 |
| YDR532C   | YDR532C   | 2 | fold_recogniti | 1qoyA   | 208 |
| YDR532C   | YDR532C   | 3 | fold_recogniti | 1qoyA   | 46  |
| YDR533C   | HSP31     | 1 | psiblast       | 1g2iA_  | 237 |
| YDR534C   | FIT1      | 1 | msa            | na      | 259 |
| YDR534C   | FIT1      | 2 | fold_recogniti | 1m2vB   | 269 |
| YDR535C   | YDR535C   | 1 | unassigned     | na      | 166 |
| YDR536W   | STL1      | 1 | psiblast       | 1ja5A_  | 429 |
| YDR536W   | STL1      | 2 | psiblast       | 1ja5A_  | 140 |
| YDR537C   | YDR537C   | 1 | unassigned     | na      | 201 |
| YDR538W   | PAD1      | 1 | psiblast       | 1e20A_  | 242 |
| YDR539W   | YDR539W   | 1 | pfam           | PF01977 | 503 |
| YDR540C   | YDR540C   | 1 | unassigned     | na      | 179 |
| YDR541C   | YDR541C   | 1 | psiblast       | 1keuA_  | 161 |
| YDR541C   | YDR541C   | 2 | psiblast       | 1keuA_  | 116 |

|           |         |   |                |         |     |
|-----------|---------|---|----------------|---------|-----|
| YDR541C   | YDR541C | 3 | psiblast       | 1keuA_  | 67  |
| YDR542W   | YDR542W | 1 | pfam           | PF00660 | 120 |
| YDR543C   | YDR543C | 1 | unassigned     | na      | 99  |
| YDR544C   | YDR544C | 1 | unassigned     | na      | 142 |
| YDR545W   | YRF1-1  | 1 | msa            | na      | 141 |
| YDR545W   | YRF1-1  | 2 | fold_recogniti | 1mukA_  | 600 |
| YDR545W   | YRF1-1  | 3 | psiblast       | 1fuuA_  | 435 |
| YDR545W   | YRF1-1  | 4 | fold_recogniti | 1m2vB   | 59  |
| YDR545W   | YRF1-1  | 5 | fold_recogniti | 1bziA   | 250 |
| YDR545W   | YRF1-1  | 6 | fold_recogniti | 1itwA_  | 311 |
| YEL001C   | YEL001C | 1 | unassigned     | na      | 225 |
| YEL002C   | WBP1    | 1 | pfam           | PF03345 | 430 |
| YEL003W   | GIM4    | 1 | psiblast       | 1fxkB_  | 123 |
| YEL004W   | YEA4    | 1 | msa            | na      | 161 |
| YEL004W   | YEA4    | 2 | msa            | na      | 181 |
| YEL005C   | VAB2    | 1 | fold_recogniti | 1qoyA   | 163 |
| YEL005C   | VAB2    | 2 | fold_recogniti | 1qoyA   | 44  |
| YEL005C   | VAB2    | 3 | unassigned     | na      | 75  |
| YEL006W   | YEL006W | 1 | fold_recogniti | 1is2A   | 335 |
| YEL007W   | YEL007W | 1 | msa            | na      | 111 |
| YEL007W   | YEL007W | 2 | fold_recogniti | 1l8mA   | 138 |
| YEL007W   | YEL007W | 3 | fold_recogniti | 1i3qA   | 365 |
| YEL007W   | YEL007W | 4 | unassigned     | na      | 52  |
| YEL008W   | YEL008W | 1 | unassigned     | na      | 126 |
| YEL009C   | GCN4    | 1 | msa            | na      | 199 |
| YEL009C   | GCN4    | 2 | psiblast       | 2dgcA_  | 82  |
| YEL010W   | YEL010W | 1 | unassigned     | na      | 116 |
| YEL011W   | GLC3    | 1 | psiblast       | 1eh9A_  | 147 |
| YEL011W   | GLC3    | 2 | psiblast       | 1eh9A_  | 292 |
| YEL011W   | GLC3    | 3 | psiblast       | 1eh9A_  | 189 |
| YEL011W   | GLC3    | 4 | psiblast       | 1pamA_  | 76  |
| YEL012W   | UBC8    | 1 | psiblast       | 1qcqA_  | 161 |
| YEL012W   | UBC8    | 2 | unassigned     | na      | 57  |
| YEL013W   | VAC8    | 1 | psiblast       | 3bct__  | 86  |
| YEL013W   | VAC8    | 2 | psiblast       | 3bct__  | 118 |
| YEL013W   | VAC8    | 3 | psiblast       | 3bct__  | 89  |
| YEL013W   | VAC8    | 4 | psiblast       | 3bct__  | 41  |
| YEL013W   | VAC8    | 5 | psiblast       | 3bct__  | 107 |
| YEL013W   | VAC8    | 6 | psiblast       | 1bk6A_  | 137 |
| YEL014C   | YEL014C | 1 | unassigned     | na      | 101 |
| YEL015W   | EDC3    | 1 | unassigned     | na      | 265 |
| YEL015W   | EDC3    | 2 | psiblast       | 1jztA_  | 286 |
| YEL016C   | YEL016C | 1 | unassigned     | na      | 68  |
| YEL016C   | YEL016C | 2 | psiblast       | 1e1zP_  | 425 |
| YEL017C-A | PMP2    | 1 | unassigned     | na      | 43  |
| YEL017W   | GTT3    | 1 | unassigned     | na      | 337 |
| YEL018W   | EAF5    | 1 | unassigned     | na      | 279 |
| YEL019C   | MMS21   | 1 | unassigned     | na      | 166 |

|           |         |   |                |         |      |
|-----------|---------|---|----------------|---------|------|
| YEL019C   | MMS21   | 2 | pfam           | PF02891 | 101  |
| YEL020C   | YEL020C | 1 | psiblast       | 1powA_  | 185  |
| YEL020C   | YEL020C | 2 | psiblast       | 1powA_  | 169  |
| YEL020C   | YEL020C | 3 | psiblast       | 1powA_  | 206  |
| YEL020W-A | TIM9    | 1 | pfam           | PF02953 | 87   |
| YEL021W   | URA3    | 1 | psiblast       | 1dqwA_  | 267  |
| YEL022W   | GEA2    | 1 | msa            | na      | 545  |
| YEL022W   | GEA2    | 2 | psiblast       | 1ku1A_  | 81   |
| YEL022W   | GEA2    | 3 | psiblast       | 1ku1A_  | 166  |
| YEL022W   | GEA2    | 4 | fold_recogniti | 1qgkA   | 322  |
| YEL022W   | GEA2    | 5 | fold_recogniti | 1qgkA   | 206  |
| YEL022W   | GEA2    | 6 | fold_recogniti | 1qgkA   | 84   |
| YEL022W   | GEA2    | 7 | fold_recogniti | 1ao6A   | 55   |
| YEL023C   | YEL023C | 1 | fold_recogniti | 1cudA   | 174  |
| YEL023C   | YEL023C | 2 | unassigned     | na      | 508  |
| YEL024W   | RIP1    | 1 | psiblast       | 1ezvE_  | 88   |
| YEL024W   | RIP1    | 2 | psiblast       | 1ezvE_  | 127  |
| YEL025C   | YEL025C | 1 | unassigned     | na      | 1188 |
| YEL026W   | SNU13   | 1 | psiblast       | 1e7kA_  | 126  |
| YEL027W   | CUP5    | 1 | pfam           | PF00137 | 81   |
| YEL027W   | CUP5    | 2 | pfam           | PF00137 | 79   |
| YEL028W   | YEL028W | 1 | unassigned     | na      | 153  |
| YEL029C   | BUD16   | 1 | psiblast       | 1jxhA_  | 312  |
| YEL030W   | ECM10   | 1 | psiblast       | 1dkgD_  | 210  |
| YEL030W   | ECM10   | 2 | psiblast       | 1dkgD_  | 118  |
| YEL030W   | ECM10   | 3 | psiblast       | 1dkgD_  | 77   |
| YEL030W   | ECM10   | 4 | psiblast       | 1dkyA_  | 146  |
| YEL030W   | ECM10   | 5 | psiblast       | 1dkyA_  | 93   |
| YEL031W   | SPF1    | 1 | unassigned     | na      | 141  |
| YEL031W   | SPF1    | 2 | psiblast       | 1eulA_  | 178  |
| YEL031W   | SPF1    | 3 | psiblast       | 1eulA_  | 357  |
| YEL031W   | SPF1    | 4 | psiblast       | 1eulA_  | 236  |
| YEL031W   | SPF1    | 5 | psiblast       | 1eulA_  | 180  |
| YEL031W   | SPF1    | 6 | msa            | na      | 123  |
| YEL032W   | MCM3    | 1 | msa            | na      | 158  |
| YEL032W   | MCM3    | 2 | pfam           | PF00493 | 208  |
| YEL032W   | MCM3    | 3 | psiblast       | 1g8pA_  | 229  |
| YEL032W   | MCM3    | 4 | psiblast       | 1g8pA_  | 74   |
| YEL032W   | MCM3    | 5 | fold_recogniti | 1g8pA   | 110  |
| YEL032W   | MCM3    | 6 | unassigned     | na      | 192  |
| YEL033W   | YEL033W | 1 | unassigned     | na      | 139  |
| YEL034W   | HYP2    | 1 | psiblast       | 1fh4A_  | 85   |
| YEL034W   | HYP2    | 2 | psiblast       | 1fh4A_  | 72   |
| YEL035C   | UTR5    | 1 | unassigned     | na      | 166  |
| YEL036C   | ANP1    | 1 | pfam           | PF03452 | 426  |
| YEL036C   | ANP1    | 2 | unassigned     | na      | 74   |
| YEL037C   | RAD23   | 1 | psiblast       | 1aarA_  | 108  |
| YEL037C   | RAD23   | 2 | psiblast       | 1ifyA_  | 110  |

|           |         |   |                |         |     |
|-----------|---------|---|----------------|---------|-----|
| YEL037C   | RAD23   | 3 | msa            | na      | 127 |
| YEL037C   | RAD23   | 4 | psiblast       | 1f4iA_  | 53  |
| YEL038W   | UTR4    | 1 | psiblast       | 1jud__  | 174 |
| YEL038W   | UTR4    | 2 | psiblast       | 1jud__  | 67  |
| YEL039C   | CYC7    | 1 | psiblast       | 1yea__  | 113 |
| YEL040W   | UTR2    | 1 | psiblast       | 1gbg__  | 124 |
| YEL040W   | UTR2    | 2 | psiblast       | 1axkA_  | 183 |
| YEL040W   | UTR2    | 3 | psiblast       | 1axkA_  | 160 |
| YEL041W   | YEL041W | 1 | unassigned     | na      | 99  |
| YEL041W   | YEL041W | 2 | pfam           | PF01513 | 344 |
| YEL041W   | YEL041W | 3 | unassigned     | na      | 52  |
| YEL042W   | GDA1    | 1 | fold_recogniti | 1bg3A   | 277 |
| YEL042W   | GDA1    | 2 | msa            | na      | 241 |
| YEL043W   | YEL043W | 1 | psiblast       | 1i84S_  | 252 |
| YEL043W   | YEL043W | 2 | psiblast       | 1i84S_  | 267 |
| YEL043W   | YEL043W | 3 | psiblast       | 1cii__  | 202 |
| YEL043W   | YEL043W | 4 | unassigned     | na      | 235 |
| YEL044W   | IES6    | 1 | unassigned     | na      | 166 |
| YEL045C   | YEL045C | 1 | unassigned     | na      | 141 |
| YEL046C   | GLY1    | 1 | psiblast       | 1jg8A_  | 138 |
| YEL046C   | GLY1    | 2 | psiblast       | 1jg8A_  | 249 |
| YEL047C   | YEL047C | 1 | psiblast       | 1qo8A_  | 316 |
| YEL047C   | YEL047C | 2 | psiblast       | 1qo8A_  | 154 |
| YEL048C   | YEL048C | 1 | unassigned     | na      | 152 |
| YEL049W   | PAU2    | 1 | pfam           | PF00660 | 120 |
| YEL050C   | RML2    | 1 | unassigned     | na      | 87  |
| YEL050C   | RML2    | 2 | psiblast       | 1lnrA_  | 306 |
| YEL051W   | VMA8    | 1 | fold_recogniti | 1av1A   | 256 |
| YEL052W   | AFG1    | 1 | psiblast       | 1e32A_  | 252 |
| YEL052W   | AFG1    | 2 | psiblast       | 1e32A_  | 104 |
| YEL052W   | AFG1    | 3 | msa            | na      | 153 |
| YEL053C   | MAK10   | 1 | msa            | na      | 502 |
| YEL053C   | MAK10   | 2 | unassigned     | na      | 231 |
| YEL055C   | POL5    | 1 | msa            | na      | 694 |
| YEL055C   | POL5    | 2 | msa            | na      | 174 |
| YEL055C   | POL5    | 3 | unassigned     | na      | 154 |
| YEL056W   | HAT2    | 1 | psiblast       | 1gg2B_  | 401 |
| YEL057C   | YEL057C | 1 | unassigned     | na      | 233 |
| YEL058W   | PCM1    | 1 | psiblast       | 1kfiA_  | 96  |
| YEL058W   | PCM1    | 2 | psiblast       | 1k2yX_  | 110 |
| YEL058W   | PCM1    | 3 | psiblast       | 1k2yX_  | 170 |
| YEL058W   | PCM1    | 4 | psiblast       | 1k2yX_  | 96  |
| YEL058W   | PCM1    | 5 | psiblast       | 1k2yX_  | 85  |
| YEL059C-A | SOM1    | 1 | unassigned     | na      | 74  |
| YEL059W   | YEL059W | 1 | unassigned     | na      | 102 |
| YEL060C   | PRB1    | 1 | unassigned     | na      | 111 |
| YEL060C   | PRB1    | 2 | psiblast       | 1scjB_  | 171 |
| YEL060C   | PRB1    | 3 | psiblast       | 1ic6A_  | 353 |



|           |           |   |                |         |     |
|-----------|-----------|---|----------------|---------|-----|
| YEL061C   | CIN8      | 1 | unassigned     | na      | 64  |
| YEL061C   | CIN8      | 2 | msa            | na      | 120 |
| YEL061C   | CIN8      | 3 | psiblast       | 1ii6A_  | 363 |
| YEL061C   | CIN8      | 4 | unassigned     | na      | 188 |
| YEL061C   | CIN8      | 5 | psiblast       | 1i84S_  | 303 |
| YEL062W   | NPR2      | 1 | msa            | na      | 378 |
| YEL062W   | NPR2      | 2 | unassigned     | na      | 246 |
| YEL063C   | CAN1      | 1 | unassigned     | na      | 73  |
| YEL063C   | CAN1      | 2 | pfam           | PF00324 | 517 |
| YEL064C   | AVT2      | 1 | pfam           | PF01490 | 480 |
| YEL065W   | SIT1      | 1 | psiblast       | 1ja5A_  | 268 |
| YEL065W   | SIT1      | 2 | unassigned     | na      | 75  |
| YEL065W   | SIT1      | 3 | msa            | na      | 285 |
| YEL066W   | HPA3      | 1 | psiblast       | 1qsmA_  | 179 |
| YEL067C   | YEL067C   | 1 | unassigned     | na      | 195 |
| YEL068C   | YEL068C   | 1 | unassigned     | na      | 110 |
| YEL069C   | HXT13     | 1 | psiblast       | 1ja5A_  | 462 |
| YEL069C   | HXT13     | 2 | psiblast       | 1ja5A_  | 102 |
| YEL070W   | YEL070W   | 1 | pfam           | PF01232 | 296 |
| YEL070W   | YEL070W   | 2 | fold_recogniti | 1n1bA   | 206 |
| YEL071W   | DLD3      | 1 | psiblast       | 1diiA_  | 284 |
| YEL071W   | DLD3      | 2 | psiblast       | 1diiA_  | 212 |
| YEL072W   | RMD6      | 1 | unassigned     | na      | 231 |
| YEL073C   | YEL073C   | 1 | unassigned     | na      | 107 |
| YEL074W   | YEL074W   | 1 | unassigned     | na      | 112 |
| YEL075C   | YEL075C   | 1 | unassigned     | na      | 122 |
| YEL075W-A | YEL075W-A | 1 | unassigned     | na      | 203 |
| YEL076C-B | 1728      | 1 | msa            | na      | 216 |
| YEL077C   | YEL077C   | 1 | msa            | na      | 112 |
| YEL077C   | YEL077C   | 2 | psiblast       | 1fuuA_  | 499 |
| YEL077C   | YEL077C   | 3 | unassigned     | na      | 66  |
| YEL077C   | YEL077C   | 4 | fold_recogniti | 1ldvA   | 230 |
| YEL077C   | YEL077C   | 5 | unassigned     | na      | 370 |
| YER001W   | MNN1      | 1 | unassigned     | na      | 233 |
| YER001W   | MNN1      | 2 | msa            | na      | 529 |
| YER002W   | NOP16     | 1 | unassigned     | na      | 231 |
| YER003C   | PMI40     | 1 | psiblast       | 1pmi__  | 429 |
| YER004W   | FMP52     | 1 | psiblast       | 1bxkB_  | 231 |
| YER005W   | YND1      | 1 | pfam           | PF01150 | 499 |
| YER005W   | YND1      | 2 | unassigned     | na      | 131 |
| YER006C-A | YER006C-A | 1 | unassigned     | na      | 105 |
| YER006W   | NUG1      | 1 | unassigned     | na      | 83  |
| YER006W   | NUG1      | 2 | psiblast       | 3ranA_  | 185 |
| YER006W   | NUG1      | 3 | psiblast       | 1egaA_  | 252 |
| YER007C-A | YER007C-A | 1 | psiblast       | 1it7A_  | 181 |
| YER007W   | PAC2      | 1 | fold_recogniti | 1lplA   | 71  |
| YER007W   | PAC2      | 2 | psiblast       | 2bnh__  | 91  |
| YER007W   | PAC2      | 3 | psiblast       | 2bnh__  | 52  |

|           |         |   |                |         |     |
|-----------|---------|---|----------------|---------|-----|
| YER007W   | PAC2    | 4 | psiblast       | 2bnh__  | 51  |
| YER007W   | PAC2    | 5 | psiblast       | 2bnh__  | 105 |
| YER007W   | PAC2    | 6 | psiblast       | 2bnh__  | 148 |
| YER008C   | SEC3    | 1 | msa            | na      | 160 |
| YER008C   | SEC3    | 2 | fold_recogniti | 1lu7A   | 147 |
| YER008C   | SEC3    | 3 | fold_recogniti | 1lu7A   | 75  |
| YER008C   | SEC3    | 4 | psiblast       | 1i84S_  | 395 |
| YER008C   | SEC3    | 5 | msa            | na      | 191 |
| YER008C   | SEC3    | 6 | unassigned     | na      | 368 |
| YER009W   | NTF2    | 1 | psiblast       | 1gy7A_  | 125 |
| YER010C   | YER010C | 1 | pfam           | PF03737 | 234 |
| YER011W   | TIR1    | 1 | fold_recogniti | 1deqA   | 254 |
| YER012W   | PRE1    | 1 | psiblast       | 1fntK_  | 198 |
| YER013W   | PRP22   | 1 | msa            | na      | 122 |
| YER013W   | PRP22   | 2 | psiblast       | 1sro__  | 160 |
| YER013W   | PRP22   | 3 | msa            | na      | 150 |
| YER013W   | PRP22   | 4 | psiblast       | 1gm5A_  | 229 |
| YER013W   | PRP22   | 5 | psiblast       | 1gm5A_  | 172 |
| YER013W   | PRP22   | 6 | msa            | na      | 312 |
| YER014C-A | BUD25   | 1 | unassigned     | na      | 153 |
| YER014W   | HEM14   | 1 | psiblast       | 1h8qA_  | 539 |
| YER015W   | FAA2    | 1 | unassigned     | na      | 77  |
| YER015W   | FAA2    | 2 | psiblast       | 1ba3__  | 322 |
| YER015W   | FAA2    | 3 | psiblast       | 1ba3__  | 345 |
| YER016W   | BIM1    | 1 | pfam           | PF00307 | 122 |
| YER016W   | BIM1    | 2 | unassigned     | na      | 66  |
| YER016W   | BIM1    | 3 | pfam           | PF03271 | 156 |
| YER017C   | AFG3    | 1 | psiblast       | 1e32A_  | 210 |
| YER017C   | AFG3    | 2 | psiblast       | 1e32A_  | 74  |
| YER017C   | AFG3    | 3 | psiblast       | 1e32A_  | 175 |
| YER017C   | AFG3    | 4 | psiblast       | 1e32A_  | 113 |
| YER017C   | AFG3    | 5 | msa            | na      | 189 |
| YER018C   | SPC25   | 1 | psiblast       | 1gk4A_  | 151 |
| YER018C   | SPC25   | 2 | unassigned     | na      | 70  |
| YER019C-A | SBH2    | 1 | pfam           | PF03911 | 88  |
| YER019W   | ISC1    | 1 | psiblast       | 1hd7A_  | 346 |
| YER019W   | ISC1    | 2 | unassigned     | na      | 131 |
| YER020W   | GPA2    | 1 | unassigned     | na      | 67  |
| YER020W   | GPA2    | 2 | psiblast       | 1agrA_  | 259 |
| YER020W   | GPA2    | 3 | psiblast       | 1agrA_  | 123 |
| YER021W   | RPN3    | 1 | msa            | na      | 109 |
| YER021W   | RPN3    | 2 | fold_recogniti | 1hz4A   | 206 |
| YER021W   | RPN3    | 3 | fold_recogniti | 1hz4A   | 132 |
| YER021W   | RPN3    | 4 | unassigned     | na      | 76  |
| YER022W   | SRB4    | 1 | msa            | na      | 342 |
| YER022W   | SRB4    | 2 | unassigned     | na      | 73  |
| YER022W   | SRB4    | 3 | msa            | na      | 272 |
| YER023W   | PRO3    | 1 | psiblast       | 1f12A_  | 286 |

|           |           |   |                |         |     |
|-----------|-----------|---|----------------|---------|-----|
| YER024W   | YAT2      | 1 | pfam           | PF00755 | 780 |
| YER024W   | YAT2      | 2 | unassigned     | na      | 143 |
| YER025W   | GCD11     | 1 | unassigned     | na      | 79  |
| YER025W   | GCD11     | 2 | psiblast       | 1kk3A_  | 226 |
| YER025W   | GCD11     | 3 | psiblast       | 1kk3A_  | 119 |
| YER025W   | GCD11     | 4 | psiblast       | 1kk3A_  | 103 |
| YER026C   | CHO1      | 1 | unassigned     | na      | 109 |
| YER026C   | CHO1      | 2 | pfam           | PF01066 | 167 |
| YER027C   | GAL83     | 1 | unassigned     | na      | 130 |
| YER027C   | GAL83     | 2 | psiblast       | 1eh9A_  | 95  |
| YER027C   | GAL83     | 3 | psiblast       | 1eh9A_  | 192 |
| YER028C   | MIG3      | 1 | psiblast       | 1lu6A_  | 110 |
| YER028C   | MIG3      | 2 | psiblast       | 1bbo__  | 69  |
| YER028C   | MIG3      | 3 | msa            | na      | 112 |
| YER028C   | MIG3      | 4 | unassigned     | na      | 103 |
| YER029C   | SMB1      | 1 | psiblast       | 1d3bB_  | 131 |
| YER029C   | SMB1      | 2 | unassigned     | na      | 65  |
| YER030W   | YER030W   | 1 | unassigned     | na      | 160 |
| YER031C   | YPT31     | 1 | psiblast       | 1g17A_  | 223 |
| YER032W   | FIR1      | 1 | unassigned     | na      | 449 |
| YER032W   | FIR1      | 2 | fold_recogniti | 1ldvA   | 56  |
| YER032W   | FIR1      | 3 | fold_recogniti | 1m2vB   | 262 |
| YER032W   | FIR1      | 4 | unassigned     | na      | 158 |
| YER033C   | ZRG8      | 1 | unassigned     | na      | 221 |
| YER033C   | ZRG8      | 2 | msa            | na      | 488 |
| YER033C   | ZRG8      | 3 | unassigned     | na      | 367 |
| YER034W   | YER034W   | 1 | unassigned     | na      | 185 |
| YER035W   | EDC2      | 1 | unassigned     | na      | 145 |
| YER036C   | YER036C   | 1 | unassigned     | na      | 75  |
| YER036C   | YER036C   | 2 | psiblast       | 1g291_  | 277 |
| YER036C   | YER036C   | 3 | unassigned     | na      | 53  |
| YER036C   | YER036C   | 4 | psiblast       | 1nbd__  | 205 |
| YER037W   | PHM8      | 1 | psiblast       | 1fezA_  | 264 |
| YER037W   | PHM8      | 2 | psiblast       | 1fezA_  | 57  |
| YER038C   | KRE29     | 1 | unassigned     | na      | 464 |
| YER038W-A | FMP49     | 1 | unassigned     | na      | 126 |
| YER039C   | HVG1      | 1 | msa            | na      | 71  |
| YER039C   | HVG1      | 2 | msa            | na      | 178 |
| YER039C-A | YER039C-A | 1 | unassigned     | na      | 72  |
| YER040W   | GLN3      | 1 | msa            | na      | 197 |
| YER040W   | GLN3      | 2 | psiblast       | 1gnf__  | 84  |
| YER040W   | GLN3      | 3 | psiblast       | 4gatA_  | 81  |
| YER040W   | GLN3      | 4 | msa            | na      | 162 |
| YER040W   | GLN3      | 5 | msa            | na      | 206 |
| YER041W   | YEN1      | 1 | psiblast       | 1b43A_  | 308 |
| YER041W   | YEN1      | 2 | psiblast       | 1b43A_  | 63  |
| YER041W   | YEN1      | 3 | unassigned     | na      | 388 |
| YER042W   | MXR1      | 1 | psiblast       | 1fvaA_  | 184 |

|           |           |   |                |         |     |
|-----------|-----------|---|----------------|---------|-----|
| YER043C   | SAH1      | 1 | psiblast       | 1b3rA_  | 287 |
| YER043C   | SAH1      | 2 | psiblast       | 1b3rA_  | 162 |
| YER044C   | ERG28     | 1 | pfam           | PF03694 | 148 |
| YER044C-A | MEI4      | 1 | unassigned     | na      | 408 |
| YER045C   | ACA1      | 1 | unassigned     | na      | 121 |
| YER045C   | ACA1      | 2 | fold_recogniti | 1i3qA   | 263 |
| YER045C   | ACA1      | 3 | fold_recogniti | 1fosH   | 105 |
| YER046W   | SPO73     | 1 | unassigned     | na      | 143 |
| YER046W-A | YER046W-A | 1 | unassigned     | na      | 109 |
| YER047C   | SAP1      | 1 | unassigned     | na      | 157 |
| YER047C   | SAP1      | 2 | msa            | na      | 166 |
| YER047C   | SAP1      | 3 | unassigned     | na      | 81  |
| YER047C   | SAP1      | 4 | psiblast       | 1e32A_  | 122 |
| YER047C   | SAP1      | 5 | psiblast       | 1e32A_  | 75  |
| YER047C   | SAP1      | 6 | psiblast       | 1e32A_  | 189 |
| YER047C   | SAP1      | 7 | psiblast       | 1e32A_  | 107 |
| YER048C   | CAJ1      | 1 | psiblast       | 1xbl__  | 144 |
| YER048C   | CAJ1      | 2 | psiblast       | 1c3gA_  | 143 |
| YER048C   | CAJ1      | 3 | msa            | na      | 104 |
| YER048W-A | YER048W-A | 1 | unassigned     | na      | 94  |
| YER049W   | YER049W   | 1 | unassigned     | na      | 136 |
| YER049W   | YER049W   | 2 | pfam           | PF03171 | 170 |
| YER049W   | YER049W   | 3 | unassigned     | na      | 338 |
| YER050C   | RSM18     | 1 | unassigned     | na      | 119 |
| YER050C   | RSM18     | 2 | psiblast       | 1fjgR_  | 83  |
| YER051W   | YER051W   | 1 | pfam           | PF00628 | 93  |
| YER051W   | YER051W   | 2 | unassigned     | na      | 191 |
| YER051W   | YER051W   | 3 | pfam           | PF02373 | 151 |
| YER051W   | YER051W   | 4 | unassigned     | na      | 57  |
| YER052C   | HOM3      | 1 | psiblast       | 1gs5A_  | 339 |
| YER052C   | HOM3      | 2 | msa            | na      | 188 |
| YER053C   | YER053C   | 1 | fold_recogniti | 1is2A   | 300 |
| YER054C   | GIP2      | 1 | unassigned     | na      | 371 |
| YER054C   | GIP2      | 2 | pfam           | PF03370 | 177 |
| YER055C   | HIS1      | 1 | pfam           | PF01634 | 243 |
| YER055C   | HIS1      | 2 | unassigned     | na      | 54  |
| YER056C   | FCY2      | 1 | unassigned     | na      | 72  |
| YER056C   | FCY2      | 2 | pfam           | PF02133 | 461 |
| YER056C-A | RPL34A    | 1 | pfam           | PF01199 | 121 |
| YER057C   | HMF1      | 1 | psiblast       | 1jd1A_  | 129 |
| YER058W   | PET117    | 1 | unassigned     | na      | 107 |
| YER059W   | PCL6      | 1 | unassigned     | na      | 127 |
| YER059W   | PCL6      | 2 | msa            | na      | 181 |
| YER059W   | PCL6      | 3 | fold_recogniti | 1g3nC   | 112 |
| YER060W   | FCY21     | 1 | unassigned     | na      | 69  |
| YER060W   | FCY21     | 2 | pfam           | PF02133 | 459 |
| YER060W-A | FCY22     | 1 | unassigned     | na      | 69  |
| YER060W-A | FCY22     | 2 | pfam           | PF02133 | 461 |

|           |           |   |                |         |     |
|-----------|-----------|---|----------------|---------|-----|
| YER061C   | CEM1      | 1 | psiblast       | 1b3nA_  | 297 |
| YER061C   | CEM1      | 2 | psiblast       | 1b3nA_  | 145 |
| YER062C   | HOR2      | 1 | psiblast       | 1qq5A_  | 192 |
| YER062C   | HOR2      | 2 | psiblast       | 1qq5A_  | 58  |
| YER063W   | THO1      | 1 | pfam           | PF02037 | 55  |
| YER063W   | THO1      | 2 | unassigned     | na      | 163 |
| YER064C   | YER064C   | 1 | unassigned     | na      | 211 |
| YER064C   | YER064C   | 2 | fold_recogniti | 1jfzA   | 233 |
| YER064C   | YER064C   | 3 | unassigned     | na      | 61  |
| YER065C   | ICL1      | 1 | psiblast       | 1dquA_  | 443 |
| YER065C   | ICL1      | 2 | psiblast       | 1dquA_  | 114 |
| YER066C-A | YER066C-A | 1 | unassigned     | na      | 166 |
| YER066W   | YER066W   | 1 | psiblast       | 1erjA_  | 185 |
| YER067C-A | YER067C-A | 1 | unassigned     | na      | 107 |
| YER067W   | YER067W   | 1 | unassigned     | na      | 161 |
| YER068C-A | YER068C-A | 1 | unassigned     | na      | 143 |
| YER068W   | MOT2      | 1 | psiblast       | 1e4uA_  | 91  |
| YER068W   | MOT2      | 2 | psiblast       | 3sxlA_  | 144 |
| YER068W   | MOT2      | 3 | msa            | na      | 180 |
| YER068W   | MOT2      | 4 | unassigned     | na      | 172 |
| YER069W   | ARG5,6    | 1 | unassigned     | na      | 96  |
| YER069W   | ARG5,6    | 2 | psiblast       | 1gs5A_  | 265 |
| YER069W   | ARG5,6    | 3 | msa            | na      | 167 |
| YER069W   | ARG5,6    | 4 | psiblast       | 1gpdG_  | 145 |
| YER069W   | ARG5,6    | 5 | psiblast       | 1gpdG_  | 190 |
| YER070W   | RNR1      | 1 | psiblast       | 2r1rA_  | 201 |
| YER070W   | RNR1      | 2 | psiblast       | 2r1rA_  | 602 |
| YER070W   | RNR1      | 3 | unassigned     | na      | 85  |
| YER071C   | YER071C   | 1 | unassigned     | na      | 126 |
| YER072W   | VTC1      | 1 | unassigned     | na      | 129 |
| YER073W   | ALD5      | 1 | psiblast       | 1bxsA_  | 331 |
| YER073W   | ALD5      | 2 | psiblast       | 1bxsA_  | 189 |
| YER074W   | RPS24A    | 1 | pfam           | PF01282 | 135 |
| YER074W-A | YER074W-A | 1 | unassigned     | na      | 33  |
| YER075C   | PTP3      | 1 | unassigned     | na      | 80  |
| YER075C   | PTP3      | 2 | psiblast       | 1hzmA_  | 168 |
| YER075C   | PTP3      | 3 | msa            | na      | 243 |
| YER075C   | PTP3      | 4 | psiblast       | 1gwz__  | 302 |
| YER075C   | PTP3      | 5 | fold_recogniti | 1bzcA   | 135 |
| YER076C   | YER076C   | 1 | unassigned     | na      | 302 |
| YER077C   | YER077C   | 1 | unassigned     | na      | 135 |
| YER077C   | YER077C   | 2 | fold_recogniti | 1hz4A   | 145 |
| YER077C   | YER077C   | 3 | fold_recogniti | 1hz4A   | 102 |
| YER077C   | YER077C   | 4 | fold_recogniti | 1hz4A   | 153 |
| YER077C   | YER077C   | 5 | unassigned     | na      | 153 |
| YER078C   | YER078C   | 1 | psiblast       | 1az9__  | 240 |
| YER078C   | YER078C   | 2 | psiblast       | 1az9__  | 271 |
| YER079W   | YER079W   | 1 | unassigned     | na      | 210 |

|           |           |   |                |         |     |
|-----------|-----------|---|----------------|---------|-----|
| YER080W   | FMP29     | 1 | unassigned     | na      | 627 |
| YER081W   | SER3      | 1 | psiblast       | 1psdA_  | 174 |
| YER081W   | SER3      | 2 | psiblast       | 1psdA_  | 295 |
| YER082C   | UTP7      | 1 | unassigned     | na      | 92  |
| YER082C   | UTP7      | 2 | psiblast       | 1gg2B_  | 356 |
| YER082C   | UTP7      | 3 | unassigned     | na      | 106 |
| YER083C   | RMD7      | 1 | fold_recogniti | 1llwA   | 307 |
| YER084W   | YER084W   | 1 | unassigned     | na      | 128 |
| YER085C   | YER085C   | 1 | unassigned     | na      | 173 |
| YER086W   | ILV1      | 1 | psiblast       | 1tdj__  | 187 |
| YER086W   | ILV1      | 2 | psiblast       | 1tdj__  | 199 |
| YER086W   | ILV1      | 3 | psiblast       | 1tdj__  | 190 |
| YER087C-A | YER087C-A | 1 | pfam           | PF03911 | 82  |
| YER087W   | YER087W   | 1 | psiblast       | 1qf6A_  | 187 |
| YER087W   | YER087W   | 2 | psiblast       | 1evkA_  | 250 |
| YER087W   | YER087W   | 3 | psiblast       | 1evkA_  | 139 |
| YER088C   | DOT6      | 1 | psiblast       | 1h88C_  | 69  |
| YER088C   | DOT6      | 2 | psiblast       | 1h88C_  | 51  |
| YER088C   | DOT6      | 3 | psiblast       | 1h88C_  | 53  |
| YER088C   | DOT6      | 4 | msa            | na      | 197 |
| YER088C   | DOT6      | 5 | fold_recogniti | 1iu4A   | 300 |
| YER089C   | PTC2      | 1 | psiblast       | 1a6q__  | 376 |
| YER089C   | PTC2      | 2 | unassigned     | na      | 88  |
| YER090W   | TRP2      | 1 | psiblast       | 1qdIA_  | 507 |
| YER091C   | MET6      | 1 | msa            | na      | 104 |
| YER091C   | MET6      | 2 | unassigned     | na      | 297 |
| YER091C   | MET6      | 3 | fold_recogniti | 1j93A   | 133 |
| YER091C   | MET6      | 4 | fold_recogniti | 1j93A   | 233 |
| YER091C-A | YER091C-A | 1 | unassigned     | na      | 73  |
| YER092W   | IES5      | 1 | unassigned     | na      | 125 |
| YER093C   | TSC11     | 1 | psiblast       | 1i84S_  | 52  |
| YER093C   | TSC11     | 2 | psiblast       | 1cii__  | 49  |
| YER093C   | TSC11     | 3 | psiblast       | 1cii__  | 110 |
| YER093C   | TSC11     | 4 | psiblast       | 1cii__  | 256 |
| YER093C   | TSC11     | 5 | fold_recogniti | 1bkdS   | 121 |
| YER093C   | TSC11     | 6 | unassigned     | na      | 318 |
| YER093C   | TSC11     | 7 | msa            | na      | 376 |
| YER093C   | TSC11     | 8 | unassigned     | na      | 148 |
| YER093C-A | YER093C-A | 1 | unassigned     | na      | 137 |
| YER094C   | PUP3      | 1 | psiblast       | 1fntJ_  | 205 |
| YER095W   | RAD51     | 1 | psiblast       | 1b22A_  | 126 |
| YER095W   | RAD51     | 2 | psiblast       | 1rea__  | 274 |
| YER096W   | SHC1      | 1 | unassigned     | na      | 152 |
| YER096W   | SHC1      | 2 | psiblast       | 1fchA_  | 184 |
| YER096W   | SHC1      | 3 | psiblast       | 1fchA_  | 111 |
| YER096W   | SHC1      | 4 | unassigned     | na      | 65  |
| YER097W   | YER097W   | 1 | unassigned     | na      | 109 |
| YER098W   | UBP9      | 1 | unassigned     | na      | 74  |

|         |         |   |                |         |      |
|---------|---------|---|----------------|---------|------|
| YER098W | UBP9    | 2 | pfam           | PF00442 | 107  |
| YER098W | UBP9    | 3 | unassigned     | na      | 105  |
| YER098W | UBP9    | 4 | msa            | na      | 244  |
| YER098W | UBP9    | 5 | unassigned     | na      | 66   |
| YER098W | UBP9    | 6 | pfam           | PF00443 | 91   |
| YER098W | UBP9    | 7 | unassigned     | na      | 67   |
| YER099C | PRS2    | 1 | psiblast       | 1dkrA_  | 175  |
| YER099C | PRS2    | 2 | psiblast       | 1dkrA_  | 143  |
| YER100W | UBC6    | 1 | psiblast       | 1qcqA_  | 178  |
| YER100W | UBC6    | 2 | unassigned     | na      | 72   |
| YER101C | AST2    | 1 | psiblast       | 1tehA_  | 282  |
| YER101C | AST2    | 2 | psiblast       | 1tehA_  | 148  |
| YER103W | SSA4    | 1 | psiblast       | 1hjoA_  | 191  |
| YER103W | SSA4    | 2 | psiblast       | 1hjoA_  | 115  |
| YER103W | SSA4    | 3 | psiblast       | 1hjoA_  | 75   |
| YER103W | SSA4    | 4 | psiblast       | 1ckrA_  | 173  |
| YER103W | SSA4    | 5 | fold_recogniti | 1dkxA   | 88   |
| YER104W | RTT105  | 1 | unassigned     | na      | 208  |
| YER105C | NUP157  | 1 | unassigned     | na      | 65   |
| YER105C | NUP157  | 2 | pfam           | PF03177 | 1326 |
| YER106W | MAM1    | 1 | unassigned     | na      | 302  |
| YER107C | GLE2    | 1 | psiblast       | 1erjA_  | 365  |
| YER109C | FLO8    | 1 | unassigned     | na      | 141  |
| YER110C | KAP123  | 1 | psiblast       | 1qgkA_  | 238  |
| YER110C | KAP123  | 2 | psiblast       | 1qgkA_  | 190  |
| YER110C | KAP123  | 3 | psiblast       | 1qgkA_  | 95   |
| YER110C | KAP123  | 4 | psiblast       | 1qgkA_  | 226  |
| YER110C | KAP123  | 5 | fold_recogniti | 1gw5B   | 149  |
| YER110C | KAP123  | 6 | fold_recogniti | 1gw5B   | 215  |
| YER111C | SWI4    | 1 | psiblast       | 1mb1__  | 165  |
| YER111C | SWI4    | 2 | msa            | na      | 255  |
| YER111C | SWI4    | 3 | psiblast       | 1awcB_  | 90   |
| YER111C | SWI4    | 4 | psiblast       | 1sw6A_  | 180  |
| YER111C | SWI4    | 5 | msa            | na      | 403  |
| YER112W | LSM4    | 1 | psiblast       | 1d3bA_  | 111  |
| YER112W | LSM4    | 2 | unassigned     | na      | 76   |
| YER113C | YER113C | 1 | unassigned     | na      | 59   |
| YER113C | YER113C | 2 | pfam           | PF02990 | 647  |
| YER114C | BOI2    | 1 | psiblast       | 2ptk__  | 108  |
| YER114C | BOI2    | 2 | psiblast       | 2ptk__  | 100  |
| YER114C | BOI2    | 3 | psiblast       | 2ptk__  | 84   |
| YER114C | BOI2    | 4 | unassigned     | na      | 89   |
| YER114C | BOI2    | 5 | fold_recogniti | 1m2vB   | 294  |
| YER114C | BOI2    | 6 | fold_recogniti | 1ei3A   | 90   |
| YER114C | BOI2    | 7 | psiblast       | 1fhwA_  | 198  |
| YER114C | BOI2    | 8 | unassigned     | na      | 77   |
| YER115C | SPR6    | 1 | unassigned     | na      | 191  |
| YER116C | SLX8    | 1 | msa            | na      | 198  |

|           |           |   |                |         |      |
|-----------|-----------|---|----------------|---------|------|
| YER116C   | SLX8      | 2 | psiblast       | 1jm7A_  | 76   |
| YER118C   | SHO1      | 1 | unassigned     | na      | 253  |
| YER118C   | SHO1      | 2 | psiblast       | 1g83A_  | 114  |
| YER119C   | AVT6      | 1 | pfam           | PF01490 | 448  |
| YER119C-A | YER119C-A | 1 | unassigned     | na      | 123  |
| YER120W   | SCS2      | 1 | psiblast       | 1grwA_  | 162  |
| YER120W   | SCS2      | 2 | unassigned     | na      | 82   |
| YER121W   | YER121W   | 1 | unassigned     | na      | 114  |
| YER122C   | GLO3      | 1 | psiblast       | 1dcqA_  | 163  |
| YER122C   | GLO3      | 2 | unassigned     | na      | 85   |
| YER122C   | GLO3      | 3 | msa            | na      | 181  |
| YER122C   | GLO3      | 4 | unassigned     | na      | 64   |
| YER123W   | YCK3      | 1 | psiblast       | 1csn__  | 89   |
| YER123W   | YCK3      | 2 | psiblast       | 1csn__  | 91   |
| YER123W   | YCK3      | 3 | psiblast       | 1csn__  | 212  |
| YER123W   | YCK3      | 4 | unassigned     | na      | 132  |
| YER124C   | DSE1      | 1 | unassigned     | na      | 573  |
| YER125W   | RSP5      | 1 | psiblast       | 1dqvA_  | 199  |
| YER125W   | RSP5      | 2 | psiblast       | 1f8aB_  | 115  |
| YER125W   | RSP5      | 3 | psiblast       | 1i5hW_  | 58   |
| YER125W   | RSP5      | 4 | fold_recogniti | 1i5hW   | 78   |
| YER125W   | RSP5      | 5 | psiblast       | 1c4zA_  | 44   |
| YER125W   | RSP5      | 6 | psiblast       | 1c4zA_  | 141  |
| YER125W   | RSP5      | 7 | psiblast       | 1c4zA_  | 174  |
| YER126C   | NSA2      | 1 | msa            | na      | 114  |
| YER126C   | NSA2      | 2 | unassigned     | na      | 147  |
| YER127W   | LCP5      | 1 | msa            | na      | 129  |
| YER127W   | LCP5      | 2 | unassigned     | na      | 228  |
| YER128W   | YER128W   | 1 | msa            | na      | 101  |
| YER128W   | YER128W   | 2 | unassigned     | na      | 102  |
| YER129W   | PAK1      | 1 | unassigned     | na      | 96   |
| YER129W   | PAK1      | 2 | psiblast       | 1a06__  | 156  |
| YER129W   | PAK1      | 3 | psiblast       | 1a06__  | 244  |
| YER129W   | PAK1      | 4 | psiblast       | 1iq5A_  | 73   |
| YER129W   | PAK1      | 5 | psiblast       | 1iq5A_  | 75   |
| YER129W   | PAK1      | 6 | fold_recogniti | 1jl5A   | 152  |
| YER129W   | PAK1      | 7 | fold_recogniti | 1jl5A   | 346  |
| YER130C   | YER130C   | 1 | msa            | na      | 177  |
| YER130C   | YER130C   | 2 | psiblast       | 1a1iA_  | 58   |
| YER130C   | YER130C   | 3 | unassigned     | na      | 107  |
| YER130C   | YER130C   | 4 | psiblast       | 2drpA_  | 101  |
| YER131W   | RPS26B    | 1 | pfam           | PF01283 | 119  |
| YER132C   | PMD1      | 1 | unassigned     | na      | 129  |
| YER132C   | PMD1      | 2 | pfam           | PF01344 | 108  |
| YER132C   | PMD1      | 3 | unassigned     | na      | 1516 |
| YER133W   | GLC7      | 1 | psiblast       | 1it6A_  | 312  |
| YER134C   | YER134C   | 1 | psiblast       | 1i7mA_  | 130  |
| YER134C   | YER134C   | 2 | psiblast       | 1i7mA_  | 48   |



|           |           |                  |         |     |
|-----------|-----------|------------------|---------|-----|
| YER135C   | YER135C   | 1 unassigned     | na      | 130 |
| YER136W   | GDI1      | 1 psiblast       | 1gnd__  | 451 |
| YER137C   | YER137C   | 1 unassigned     | na      | 148 |
| YER138W-A | YER138W-A | 1 unassigned     | na      | 34  |
| YER139C   | YER139C   | 1 msa            | na      | 142 |
| YER139C   | YER139C   | 2 unassigned     | na      | 84  |
| YER140W   | YER140W   | 1 unassigned     | na      | 139 |
| YER140W   | YER140W   | 2 msa            | na      | 74  |
| YER140W   | YER140W   | 3 msa            | na      | 202 |
| YER140W   | YER140W   | 4 unassigned     | na      | 141 |
| YER141W   | COX15     | 1 unassigned     | na      | 64  |
| YER141W   | COX15     | 2 pfam           | PF02628 | 422 |
| YER142C   | MAG1      | 1 psiblast       | 1dizA_  | 296 |
| YER143W   | DDI1      | 1 psiblast       | 1aarA_  | 82  |
| YER143W   | DDI1      | 2 unassigned     | na      | 69  |
| YER143W   | DDI1      | 3 psiblast       | 2aidA_  | 153 |
| YER143W   | DDI1      | 4 psiblast       | 1rvnA_  | 83  |
| YER143W   | DDI1      | 5 psiblast       | 1dv0A_  | 41  |
| YER144C   | UBP5      | 1 unassigned     | na      | 147 |
| YER144C   | UBP5      | 2 pfam           | PF00581 | 130 |
| YER144C   | UBP5      | 3 fold_recogniti | 1ldvA   | 211 |
| YER144C   | UBP5      | 4 unassigned     | na      | 52  |
| YER144C   | UBP5      | 5 msa            | na      | 130 |
| YER144C   | UBP5      | 6 msa            | na      | 69  |
| YER144C   | UBP5      | 7 pfam           | PF00443 | 66  |
| YER145C   | FTR1      | 1 pfam           | PF03239 | 323 |
| YER145C   | FTR1      | 2 unassigned     | na      | 81  |
| YER145C-A | YER145C-A | 1 unassigned     | na      | 145 |
| YER146W   | LSM5      | 1 psiblast       | 1i81A_  | 93  |
| YER147C   | SCC4      | 1 fold_recogniti | 1e8yA   | 218 |
| YER147C   | SCC4      | 2 fold_recogniti | 1e8yA   | 154 |
| YER147C   | SCC4      | 3 fold_recogniti | 1e8yA   | 252 |
| YER148W   | SPT15     | 1 psiblast       | 1tbaB_  | 151 |
| YER148W   | SPT15     | 2 psiblast       | 1tbaB_  | 89  |
| YER148W-A | YER148W-A | 1 unassigned     | na      | 192 |
| YER149C   | PEA2      | 1 fold_recogniti | 1e6vA   | 137 |
| YER149C   | PEA2      | 2 fold_recogniti | 1e6vA   | 283 |
| YER150W   | SPI1      | 1 unassigned     | na      | 148 |
| YER151C   | UBP3      | 1 fold_recogniti | 1i3qA   | 253 |
| YER151C   | UBP3      | 2 fold_recogniti | 1ldvA   | 163 |
| YER151C   | UBP3      | 3 pfam           | PF00442 | 83  |
| YER151C   | UBP3      | 4 unassigned     | na      | 76  |
| YER151C   | UBP3      | 5 msa            | na      | 237 |
| YER151C   | UBP3      | 6 pfam           | PF00443 | 100 |
| YER152C   | YER152C   | 1 psiblast       | 1iaxA_  | 118 |
| YER152C   | YER152C   | 2 psiblast       | 1iaxA_  | 325 |
| YER153C   | PET122    | 1 msa            | na      | 254 |
| YER154W   | OXA1      | 1 unassigned     | na      | 92  |

|           |           |    |                |         |     |
|-----------|-----------|----|----------------|---------|-----|
| YER154W   | OXA1      | 2  | pfam           | PF02096 | 243 |
| YER154W   | OXA1      | 3  | unassigned     | na      | 67  |
| YER155C   | BEM2      | 1  | unassigned     | na      | 575 |
| YER155C   | BEM2      | 2  | pfam           | PF00617 | 235 |
| YER155C   | BEM2      | 3  | unassigned     | na      | 294 |
| YER155C   | BEM2      | 4  | pfam           | PF00618 | 84  |
| YER155C   | BEM2      | 5  | unassigned     | na      | 426 |
| YER155C   | BEM2      | 6  | msa            | na      | 300 |
| YER155C   | BEM2      | 7  | psiblast       | 1f7cA_  | 137 |
| YER155C   | BEM2      | 8  | psiblast       | 1f7cA_  | 116 |
| YER156C   | YER156C   | 1  | pfam           | PF03690 | 338 |
| YER157W   | COG3      | 1  | fold_recogniti | 1qgkA   | 414 |
| YER157W   | COG3      | 2  | fold_recogniti | 1qgkA   | 119 |
| YER157W   | COG3      | 3  | fold_recogniti | 1qgkA   | 122 |
| YER157W   | COG3      | 4  | fold_recogniti | 1qgkA   | 146 |
| YER158C   | YER158C   | 1  | fold_recogniti | 1i3qA   | 417 |
| YER158C   | YER158C   | 2  | unassigned     | na      | 156 |
| YER159C   | BUR6      | 1  | psiblast       | 1jfiA_  | 142 |
| YER161C   | SPT2      | 1  | unassigned     | na      | 93  |
| YER161C   | SPT2      | 2  | msa            | na      | 240 |
| YER162C   | RAD4      | 1  | unassigned     | na      | 244 |
| YER162C   | RAD4      | 2  | pfam           | PF03835 | 450 |
| YER162C   | RAD4      | 3  | unassigned     | na      | 60  |
| YER163C   | YER163C   | 1  | msa            | na      | 232 |
| YER164W   | CHD1      | 1  | unassigned     | na      | 133 |
| YER164W   | CHD1      | 2  | pfam           | PF00385 | 128 |
| YER164W   | CHD1      | 3  | fold_recogniti | 1gm5A   | 80  |
| YER164W   | CHD1      | 4  | fold_recogniti | 1gm5A   | 219 |
| YER164W   | CHD1      | 5  | fold_recogniti | 1hv8A   | 66  |
| YER164W   | CHD1      | 6  | psiblast       | 1hv8A_  | 68  |
| YER164W   | CHD1      | 7  | psiblast       | 1d9xA_  | 233 |
| YER164W   | CHD1      | 8  | msa            | na      | 178 |
| YER164W   | CHD1      | 9  | msa            | na      | 161 |
| YER164W   | CHD1      | 10 | unassigned     | na      | 95  |
| YER164W   | CHD1      | 11 | msa            | na      | 107 |
| YER165C-A | YER165C-A | 1  | unassigned     | na      | 118 |
| YER165W   | PAB1      | 1  | psiblast       | 1cvjA_  | 116 |
| YER165W   | PAB1      | 2  | psiblast       | 1cvjA_  | 99  |
| YER165W   | PAB1      | 3  | psiblast       | 1l3kA_  | 92  |
| YER165W   | PAB1      | 4  | psiblast       | 1l3kA_  | 125 |
| YER165W   | PAB1      | 5  | unassigned     | na      | 53  |
| YER165W   | PAB1      | 6  | psiblast       | 1ifwA_  | 92  |
| YER166W   | DNF1      | 1  | msa            | na      | 282 |
| YER166W   | DNF1      | 2  | psiblast       | 1eulA_  | 182 |
| YER166W   | DNF1      | 3  | psiblast       | 1eulA_  | 389 |
| YER166W   | DNF1      | 4  | psiblast       | 1eulA_  | 273 |
| YER166W   | DNF1      | 5  | psiblast       | 1eulA_  | 292 |
| YER166W   | DNF1      | 6  | msa            | na      | 153 |

|           |           |    |                |         |     |
|-----------|-----------|----|----------------|---------|-----|
| YER167W   | BCK2      | 1  | unassigned     | na      | 851 |
| YER168C   | CCA1      | 1  | unassigned     | na      | 123 |
| YER168C   | CCA1      | 2  | pfam           | PF01743 | 227 |
| YER168C   | CCA1      | 3  | unassigned     | na      | 196 |
| YER169W   | RPH1      | 1  | pfam           | PF02375 | 59  |
| YER169W   | RPH1      | 2  | msa            | na      | 139 |
| YER169W   | RPH1      | 3  | pfam           | PF02373 | 180 |
| YER169W   | RPH1      | 4  | unassigned     | na      | 53  |
| YER169W   | RPH1      | 5  | psiblast       | 1ubdC_  | 156 |
| YER169W   | RPH1      | 6  | msa            | na      | 89  |
| YER169W   | RPH1      | 7  | psiblast       | 1meyG_  | 120 |
| YER170W   | ADK2      | 1  | psiblast       | 2ak3A_  | 225 |
| YER171W   | RAD3      | 1  | psiblast       | 1hv8A_  | 221 |
| YER171W   | RAD3      | 2  | psiblast       | 1hv8A_  | 168 |
| YER171W   | RAD3      | 3  | unassigned     | na      | 52  |
| YER171W   | RAD3      | 4  | fold_recogniti | 1fuuA   | 284 |
| YER171W   | RAD3      | 5  | unassigned     | na      | 53  |
| YER172C   | BRR2      | 1  | msa            | na      | 131 |
| YER172C   | BRR2      | 2  | unassigned     | na      | 80  |
| YER172C   | BRR2      | 3  | msa            | na      | 253 |
| YER172C   | BRR2      | 4  | psiblast       | 1hv8A_  | 234 |
| YER172C   | BRR2      | 5  | psiblast       | 1hv8A_  | 205 |
| YER172C   | BRR2      | 6  | psiblast       | 1d9xA_  | 134 |
| YER172C   | BRR2      | 7  | unassigned     | na      | 281 |
| YER172C   | BRR2      | 8  | msa            | na      | 466 |
| YER172C   | BRR2      | 9  | unassigned     | na      | 136 |
| YER172C   | BRR2      | 10 | psiblast       | 1jj2X_  | 167 |
| YER172C   | BRR2      | 11 | unassigned     | na      | 76  |
| YER172C-A | YER172C-A | 1  | unassigned     | na      | 126 |
| YER173W   | RAD24     | 1  | psiblast       | 1jr3A_  | 221 |
| YER173W   | RAD24     | 2  | psiblast       | 1jr3A_  | 198 |
| YER173W   | RAD24     | 3  | unassigned     | na      | 240 |
| YER174C   | GRX4      | 1  | psiblast       | 1quwA_  | 137 |
| YER174C   | GRX4      | 2  | psiblast       | 1b4qA_  | 107 |
| YER175C   | TMT1      | 1  | psiblast       | 1kp9A_  | 195 |
| YER175C   | TMT1      | 2  | psiblast       | 1kp9A_  | 104 |
| YER176W   | ECM32     | 1  | fold_recogniti | 1i3qA   | 382 |
| YER176W   | ECM32     | 2  | fold_recogniti | 1l8mA   | 79  |
| YER176W   | ECM32     | 3  | unassigned     | na      | 171 |
| YER176W   | ECM32     | 4  | psiblast       | 1pjr__  | 489 |
| YER177W   | BMH1      | 1  | psiblast       | 1a37A_  | 115 |
| YER177W   | BMH1      | 2  | psiblast       | 1a37A_  | 152 |
| YER178W   | PDA1      | 1  | psiblast       | 1dtwA_  | 443 |
| YER179W   | DMC1      | 1  | psiblast       | 1b22A_  | 54  |
| YER179W   | DMC1      | 2  | psiblast       | 1rea__  | 280 |
| YER180C   | ISC10     | 1  | unassigned     | na      | 267 |
| YER181C   | YER181C   | 1  | unassigned     | na      | 107 |
| YER182W   | FMP10     | 1  | unassigned     | na      | 80  |

|           |           |   |                |         |      |
|-----------|-----------|---|----------------|---------|------|
| YER182W   | FMP10     | 2 | msa            | na      | 164  |
| YER183C   | FAU1      | 1 | pfam           | PF01812 | 211  |
| YER184C   | YER184C   | 1 | psiblast       | 1hwtD_  | 81   |
| YER184C   | YER184C   | 2 | unassigned     | na      | 104  |
| YER184C   | YER184C   | 3 | msa            | na      | 274  |
| YER184C   | YER184C   | 4 | unassigned     | na      | 335  |
| YER185W   | YER185W   | 1 | unassigned     | na      | 170  |
| YER185W   | YER185W   | 2 | msa            | na      | 133  |
| YER186C   | YER186C   | 1 | unassigned     | na      | 306  |
| YER187W   | YER187W   | 1 | unassigned     | na      | 141  |
| YER188C-A | YER188C-A | 1 | unassigned     | na      | 99   |
| YER188W   | YER188W   | 1 | unassigned     | na      | 239  |
| YER189W   | YER189W   | 1 | unassigned     | na      | 122  |
| YER190W   | YRF1-2    | 1 | msa            | na      | 63   |
| YER190W   | YRF1-2    | 2 | fold_recogniti | 1llwA   | 330  |
| YER190W   | YRF1-2    | 3 | unassigned     | na      | 187  |
| YER190W   | YRF1-2    | 4 | psiblast       | 1fuuA_  | 499  |
| YER190W   | YRF1-2    | 5 | fold_recogniti | 1m2vB   | 256  |
| YER190W   | YRF1-2    | 6 | fold_recogniti | 1qoyA   | 346  |
| YFL001W   | DEG1      | 1 | unassigned     | na      | 84   |
| YFL001W   | DEG1      | 2 | psiblast       | 1dj0A_  | 159  |
| YFL001W   | DEG1      | 3 | psiblast       | 1dj0A_  | 111  |
| YFL001W   | DEG1      | 4 | unassigned     | na      | 88   |
| YFL002C   | SPB4      | 1 | psiblast       | 1hv8A_  | 231  |
| YFL002C   | SPB4      | 2 | psiblast       | 1hv8A_  | 157  |
| YFL002C   | SPB4      | 3 | psiblast       | 1d9xA_  | 131  |
| YFL002C   | SPB4      | 4 | unassigned     | na      | 87   |
| YFL003C   | MSH4      | 1 | psiblast       | 1e3mA_  | 84   |
| YFL003C   | MSH4      | 2 | psiblast       | 1e3mA_  | 178  |
| YFL003C   | MSH4      | 3 | psiblast       | 1e3mA_  | 319  |
| YFL003C   | MSH4      | 4 | psiblast       | 1e3mA_  | 220  |
| YFL003C   | MSH4      | 5 | psiblast       | 1e3mA_  | 77   |
| YFL004W   | VTC2      | 1 | pfam           | PF03105 | 184  |
| YFL004W   | VTC2      | 2 | unassigned     | na      | 54   |
| YFL004W   | VTC2      | 3 | msa            | na      | 590  |
| YFL005W   | SEC4      | 1 | psiblast       | 1g17A_  | 215  |
| YFL006W   | 1947      | 1 | fold_recogniti | 1b3uA   | 254  |
| YFL007W   | BLM3      | 1 | unassigned     | na      | 1804 |
| YFL008W   | SMC1      | 1 | fold_recogniti | 1ii8A   | 49   |
| YFL008W   | SMC1      | 2 | psiblast       | 1i84S_  | 317  |
| YFL008W   | SMC1      | 3 | psiblast       | 2tmaA_  | 79   |
| YFL008W   | SMC1      | 4 | psiblast       | 2tmaA_  | 54   |
| YFL008W   | SMC1      | 5 | psiblast       | 1gxIA_  | 77   |
| YFL008W   | SMC1      | 6 | psiblast       | 1cii__  | 150  |
| YFL008W   | SMC1      | 7 | psiblast       | 1cii__  | 290  |
| YFL008W   | SMC1      | 8 | psiblast       | 1e69A_  | 209  |
| YFL009W   | CDC4      | 1 | unassigned     | na      | 107  |
| YFL009W   | CDC4      | 2 | psiblast       | 1gxRA_  | 343  |

|           |           |   |                |         |     |
|-----------|-----------|---|----------------|---------|-----|
| YFL009W   | CDC4      | 3 | psiblast       | 1erjA_  | 151 |
| YFL009W   | CDC4      | 4 | fold_recogniti | 1jjuB   | 178 |
| YFL010C   | WWM1      | 1 | psiblast       | 1f8aB_  | 52  |
| YFL010C   | WWM1      | 2 | unassigned     | na      | 159 |
| YFL010W-A | AUA1      | 1 | unassigned     | na      | 94  |
| YFL011W   | HXT10     | 1 | psiblast       | 1ja5A_  | 453 |
| YFL011W   | HXT10     | 2 | psiblast       | 1ja5A_  | 93  |
| YFL012W   | YFL012W   | 1 | unassigned     | na      | 148 |
| YFL012W-A | YFL012W-A | 1 | unassigned     | na      | 124 |
| YFL013C   | IES1      | 1 | unassigned     | na      | 103 |
| YFL013C   | IES1      | 2 | msa            | na      | 374 |
| YFL013C   | IES1      | 3 | unassigned     | na      | 215 |
| YFL013W-A | YFL013W-A | 1 | unassigned     | na      | 267 |
| YFL014W   | HSP12     | 1 | unassigned     | na      | 109 |
| YFL015C   | YFL015C   | 1 | unassigned     | na      | 164 |
| YFL016C   | MDJ1      | 1 | psiblast       | 1xbl__  | 180 |
| YFL016C   | MDJ1      | 2 | psiblast       | 1exkA_  | 116 |
| YFL016C   | MDJ1      | 3 | psiblast       | 1c3gA_  | 215 |
| YFL017C   | GNA1      | 1 | psiblast       | 1i1dA_  | 159 |
| YFL017W-A | SMX2      | 1 | psiblast       | 1i81A_  | 77  |
| YFL018C   | LPD1      | 1 | psiblast       | 1jehA_  | 200 |
| YFL018C   | LPD1      | 2 | psiblast       | 1jehA_  | 183 |
| YFL018C   | LPD1      | 3 | psiblast       | 1jehA_  | 116 |
| YFL019C   | YFL019C   | 1 | unassigned     | na      | 117 |
| YFL020C   | PAU5      | 1 | pfam           | PF00660 | 122 |
| YFL021C-A | YFL021C-A | 1 | unassigned     | na      | 284 |
| YFL021W   | GAT1      | 1 | msa            | na      | 238 |
| YFL021W   | GAT1      | 2 | psiblast       | 1gnf__  | 58  |
| YFL021W   | GAT1      | 3 | psiblast       | 4gatA_  | 108 |
| YFL021W   | GAT1      | 4 | msa            | na      | 106 |
| YFL022C   | FRS2      | 1 | fold_recogniti | 1lnwA   | 114 |
| YFL022C   | FRS2      | 2 | psiblast       | 1b70A_  | 389 |
| YFL023W   | BUD27     | 1 | pfam           | PF02996 | 128 |
| YFL023W   | BUD27     | 2 | fold_recogniti | 1l8mA   | 73  |
| YFL023W   | BUD27     | 3 | fold_recogniti | 1l8mA   | 79  |
| YFL023W   | BUD27     | 4 | fold_recogniti | 1l8mA   | 70  |
| YFL023W   | BUD27     | 5 | fold_recogniti | 1l8mA   | 75  |
| YFL023W   | BUD27     | 6 | fold_recogniti | 1i3qA   | 231 |
| YFL023W   | BUD27     | 7 | unassigned     | na      | 140 |
| YFL024C   | EPL1      | 1 | unassigned     | na      | 92  |
| YFL024C   | EPL1      | 2 | msa            | na      | 65  |
| YFL024C   | EPL1      | 3 | unassigned     | na      | 72  |
| YFL024C   | EPL1      | 4 | psiblast       | 1eqfA_  | 130 |
| YFL024C   | EPL1      | 5 | psiblast       | 1eqfA_  | 85  |
| YFL024C   | EPL1      | 6 | msa            | na      | 94  |
| YFL024C   | EPL1      | 7 | unassigned     | na      | 294 |
| YFL025C   | BST1      | 1 | msa            | na      | 396 |
| YFL025C   | BST1      | 2 | unassigned     | na      | 633 |

|           |         |   |                |         |     |
|-----------|---------|---|----------------|---------|-----|
| YFL026W   | STE2    | 1 | pfam           | PF02116 | 431 |
| YFL027C   | GYP8    | 1 | psiblast       | 1fkmA_  | 250 |
| YFL027C   | GYP8    | 2 | psiblast       | 1fkmA_  | 61  |
| YFL027C   | GYP8    | 3 | msa            | na      | 186 |
| YFL028C   | CAF16   | 1 | psiblast       | 1jsqA_  | 289 |
| YFL029C   | CAK1    | 1 | psiblast       | 1aq1__  | 81  |
| YFL029C   | CAK1    | 2 | psiblast       | 1aq1__  | 123 |
| YFL029C   | CAK1    | 3 | psiblast       | 1aq1__  | 67  |
| YFL029C   | CAK1    | 4 | psiblast       | 1aq1__  | 97  |
| YFL030W   | AGX1    | 1 | psiblast       | 1ecxA_  | 115 |
| YFL030W   | AGX1    | 2 | psiblast       | 1ecxA_  | 270 |
| YFL031W   | HAC1    | 1 | psiblast       | 1i84S_  | 132 |
| YFL031W   | HAC1    | 2 | unassigned     | na      | 106 |
| YFL032W   | YFL032W | 1 | unassigned     | na      | 106 |
| YFL033C   | RIM15   | 1 | unassigned     | na      | 403 |
| YFL033C   | RIM15   | 2 | fold_recogniti | 1i3qA   | 382 |
| YFL033C   | RIM15   | 3 | psiblast       | 1lg3A_  | 195 |
| YFL033C   | RIM15   | 4 | psiblast       | 1fotA_  | 142 |
| YFL033C   | RIM15   | 5 | psiblast       | 1fotA_  | 218 |
| YFL033C   | RIM15   | 6 | unassigned     | na      | 430 |
| YFL034C-A | RPL22B  | 1 | pfam           | PF01776 | 122 |
| YFL034C-B | MOB2    | 1 | unassigned     | na      | 64  |
| YFL034C-B | MOB2    | 2 | pfam           | PF03637 | 223 |
| YFL034W   | YFL034W | 1 | unassigned     | na      | 318 |
| YFL034W   | YFL034W | 2 | msa            | na      | 526 |
| YFL034W   | YFL034W | 3 | unassigned     | na      | 229 |
| YFL036W   | RPO41   | 1 | unassigned     | na      | 379 |
| YFL036W   | RPO41   | 2 | psiblast       | 1aroP_  | 131 |
| YFL036W   | RPO41   | 3 | psiblast       | 1aroP_  | 316 |
| YFL036W   | RPO41   | 4 | psiblast       | 1aroP_  | 179 |
| YFL036W   | RPO41   | 5 | psiblast       | 1aroP_  | 254 |
| YFL036W   | RPO41   | 6 | unassigned     | na      | 92  |
| YFL037W   | TUB2    | 1 | psiblast       | 1ffxB_  | 457 |
| YFL038C   | YPT1    | 1 | psiblast       | 1g17A_  | 206 |
| YFL039C   | ACT1    | 1 | psiblast       | 2btfA_  | 174 |
| YFL039C   | ACT1    | 2 | psiblast       | 2btfA_  | 201 |
| YFL040W   | YFL040W | 1 | psiblast       | 1ja5A_  | 429 |
| YFL040W   | YFL040W | 2 | psiblast       | 1ja5A_  | 111 |
| YFL041W   | FET5    | 1 | psiblast       | 1kyaA_  | 366 |
| YFL041W   | FET5    | 2 | psiblast       | 1kyaA_  | 199 |
| YFL041W   | FET5    | 3 | unassigned     | na      | 57  |
| YFL042C   | YFL042C | 1 | msa            | na      | 191 |
| YFL042C   | YFL042C | 2 | pfam           | PF02893 | 117 |
| YFL042C   | YFL042C | 3 | unassigned     | na      | 53  |
| YFL042C   | YFL042C | 4 | msa            | na      | 234 |
| YFL042C   | YFL042C | 5 | unassigned     | na      | 79  |
| YFL044C   | YFL044C | 1 | unassigned     | na      | 94  |
| YFL044C   | YFL044C | 2 | pfam           | PF02338 | 138 |

|         |         |                  |         |     |
|---------|---------|------------------|---------|-----|
| YFL044C | YFL044C | 3 unassigned     | na      | 69  |
| YFL045C | SEC53   | 1 pfam           | PF03332 | 254 |
| YFL046W | FMP32   | 1 msa            | na      | 134 |
| YFL046W | FMP32   | 2 unassigned     | na      | 73  |
| YFL047W | RGD2    | 1 fold_recogniti | 1av1A   | 225 |
| YFL047W | RGD2    | 2 pfam           | PF00610 | 74  |
| YFL047W | RGD2    | 3 unassigned     | na      | 67  |
| YFL047W | RGD2    | 4 psiblast       | 1rgp__  | 203 |
| YFL047W | RGD2    | 5 psiblast       | 1rgp__  | 145 |
| YFL048C | EMP47   | 1 psiblast       | 1gv9A_  | 265 |
| YFL048C | EMP47   | 2 msa            | na      | 180 |
| YFL049W | YFL049W | 1 msa            | na      | 240 |
| YFL049W | YFL049W | 2 unassigned     | na      | 383 |
| YFL050C | ALR2    | 1 unassigned     | na      | 372 |
| YFL050C | ALR2    | 2 msa            | na      | 182 |
| YFL050C | ALR2    | 3 fold_recogniti | 1hciA   | 147 |
| YFL050C | ALR2    | 4 msa            | na      | 157 |
| YFL051C | YFL051C | 1 unassigned     | na      | 160 |
| YFL052W | YFL052W | 1 psiblast       | 1d66A_  | 43  |
| YFL052W | YFL052W | 2 msa            | na      | 307 |
| YFL052W | YFL052W | 3 unassigned     | na      | 115 |
| YFL053W | DAK2    | 1 fold_recogniti | 1e1cB   | 591 |
| YFL054C | YFL054C | 1 msa            | na      | 236 |
| YFL054C | YFL054C | 2 unassigned     | na      | 90  |
| YFL054C | YFL054C | 3 psiblast       | 1fx8A_  | 134 |
| YFL054C | YFL054C | 4 psiblast       | 1fx8A_  | 186 |
| YFL055W | AGP3    | 1 pfam           | PF00324 | 558 |
| YFL056C | AAD6    | 1 psiblast       | 1exbA_  | 212 |
| YFL057C | AAD16   | 1 psiblast       | 1exbA_  | 152 |
| YFL058W | THI5    | 1 psiblast       | 1hpbP_  | 184 |
| YFL058W | THI5    | 2 psiblast       | 1hpbP_  | 102 |
| YFL058W | THI5    | 3 unassigned     | na      | 54  |
| YFL059W | SNZ3    | 1 fold_recogniti | 1gt8A   | 190 |
| YFL059W | SNZ3    | 2 psiblast       | 2tpsA_  | 108 |
| YFL060C | SNO3    | 1 psiblast       | 1gpmA_  | 222 |
| YFL061W | YFL061W | 1 pfam           | PF01966 | 225 |
| YFL062W | COS4    | 1 msa            | na      | 61  |
| YFL062W | COS4    | 2 pfam           | PF00674 | 107 |
| YFL062W | COS4    | 3 unassigned     | na      | 73  |
| YFL062W | COS4    | 4 pfam           | PF00674 | 138 |
| YFL063W | YFL063W | 1 unassigned     | na      | 151 |
| YFL064C | YFL064C | 1 unassigned     | na      | 174 |
| YFL065C | YFL065C | 1 unassigned     | na      | 102 |
| YFL066C | YFL066C | 1 psiblast       | 1fuuA_  | 392 |
| YFL067W | YFL067W | 1 fold_recogniti | 1deqA   | 175 |
| YFL068W | YFL068W | 1 unassigned     | na      | 160 |
| YFR001W | LOC1    | 1 unassigned     | na      | 204 |
| YFR002W | NIC96   | 1 fold_recogniti | 1bgxT   | 174 |

|           |           |   |                |         |     |
|-----------|-----------|---|----------------|---------|-----|
| YFR002W   | NIC96     | 2 | fold_recogniti | 1bgxT   | 436 |
| YFR002W   | NIC96     | 3 | fold_recogniti | 1bgxT   | 119 |
| YFR002W   | NIC96     | 4 | fold_recogniti | 1b8fA   | 110 |
| YFR003C   | YPI1      | 1 | fold_recogniti | 1kkqC   | 155 |
| YFR004W   | RPN11     | 1 | pfam           | PF01398 | 159 |
| YFR004W   | RPN11     | 2 | unassigned     | na      | 52  |
| YFR004W   | RPN11     | 3 | msa            | na      | 95  |
| YFR005C   | SAD1      | 1 | msa            | na      | 124 |
| YFR005C   | SAD1      | 2 | msa            | na      | 324 |
| YFR006W   | YFR006W   | 1 | psiblast       | 1az9__  | 227 |
| YFR006W   | YFR006W   | 2 | psiblast       | 1az9__  | 308 |
| YFR007W   | YFR007W   | 1 | psiblast       | 1esmA_  | 353 |
| YFR008W   | FAR7      | 1 | unassigned     | na      | 221 |
| YFR009W   | GCN20     | 1 | unassigned     | na      | 182 |
| YFR009W   | GCN20     | 2 | psiblast       | 1b0uA_  | 309 |
| YFR009W   | GCN20     | 3 | psiblast       | 1jsqA_  | 261 |
| YFR010W   | UBP6      | 1 | psiblast       | 1ud7A_  | 80  |
| YFR010W   | UBP6      | 2 | pfam           | PF00442 | 75  |
| YFR010W   | UBP6      | 3 | msa            | na      | 270 |
| YFR010W   | UBP6      | 4 | pfam           | PF00443 | 74  |
| YFR011C   | YFR011C   | 1 | unassigned     | na      | 170 |
| YFR012W   | YFR012W   | 1 | msa            | na      | 202 |
| YFR012W-A | YFR012W-A | 1 | unassigned     | na      | 28  |
| YFR013W   | IOC3      | 1 | fold_recogniti | 1ldvA   | 217 |
| YFR013W   | IOC3      | 2 | unassigned     | na      | 570 |
| YFR014C   | CMK1      | 1 | psiblast       | 1a06__  | 144 |
| YFR014C   | CMK1      | 2 | psiblast       | 1a06__  | 200 |
| YFR014C   | CMK1      | 3 | psiblast       | 1iq5A_  | 102 |
| YFR015C   | GSY1      | 1 | unassigned     | na      | 68  |
| YFR015C   | GSY1      | 2 | msa            | na      | 291 |
| YFR015C   | GSY1      | 3 | msa            | na      | 297 |
| YFR015C   | GSY1      | 4 | unassigned     | na      | 52  |
| YFR016C   | YFR016C   | 1 | unassigned     | na      | 73  |
| YFR016C   | YFR016C   | 2 | psiblast       | 1i84S_  | 352 |
| YFR016C   | YFR016C   | 3 | unassigned     | na      | 56  |
| YFR016C   | YFR016C   | 4 | fold_recogniti | 1i3qA   | 333 |
| YFR016C   | YFR016C   | 5 | fold_recogniti | 1i8mA   | 103 |
| YFR016C   | YFR016C   | 6 | fold_recogniti | 1i8mA   | 79  |
| YFR016C   | YFR016C   | 7 | fold_recogniti | 1i8mA   | 70  |
| YFR016C   | YFR016C   | 8 | fold_recogniti | 1i8mA   | 114 |
| YFR016C   | YFR016C   | 9 | unassigned     | na      | 53  |
| YFR017C   | YFR017C   | 1 | unassigned     | na      | 195 |
| YFR018C   | YFR018C   | 1 | psiblast       | 1amp__  | 363 |
| YFR019W   | FAB1      | 1 | msa            | na      | 129 |
| YFR019W   | FAB1      | 2 | unassigned     | na      | 94  |
| YFR019W   | FAB1      | 3 | psiblast       | 1hyiA_  | 95  |
| YFR019W   | FAB1      | 4 | unassigned     | na      | 303 |
| YFR019W   | FAB1      | 5 | psiblast       | 1a6dA_  | 506 |



|           |         |    |                |         |     |
|-----------|---------|----|----------------|---------|-----|
| YFR019W   | FAB1    | 6  | psiblast       | 1a6dA_  | 118 |
| YFR019W   | FAB1    | 7  | unassigned     | na      | 311 |
| YFR019W   | FAB1    | 8  | msa            | na      | 350 |
| YFR019W   | FAB1    | 9  | psiblast       | 1bo1A_  | 301 |
| YFR019W   | FAB1    | 10 | fold_recogniti | 1bo1A   | 71  |
| YFR020W   | YFR020W | 1  | unassigned     | na      | 232 |
| YFR021W   | ATG18   | 1  | msa            | na      | 79  |
| YFR021W   | ATG18   | 2  | psiblast       | 1gg2B_  | 52  |
| YFR021W   | ATG18   | 3  | psiblast       | 1erjA_  | 369 |
| YFR022W   | YFR022W | 1  | msa            | na      | 132 |
| YFR022W   | YFR022W | 2  | psiblast       | 1jsyA_  | 133 |
| YFR022W   | YFR022W | 3  | psiblast       | 1jsyA_  | 179 |
| YFR022W   | YFR022W | 4  | msa            | na      | 289 |
| YFR023W   | PES4    | 1  | msa            | na      | 76  |
| YFR023W   | PES4    | 2  | psiblast       | 1cvjA_  | 100 |
| YFR023W   | PES4    | 3  | psiblast       | 1fjcA_  | 97  |
| YFR023W   | PES4    | 4  | psiblast       | 1h6kX_  | 104 |
| YFR023W   | PES4    | 5  | psiblast       | 1i3kA_  | 133 |
| YFR023W   | PES4    | 6  | msa            | na      | 101 |
| YFR024C-A | LSB3    | 1  | msa            | na      | 362 |
| YFR024C-A | LSB3    | 2  | psiblast       | 1semA_  | 89  |
| YFR025C   | HIS2    | 1  | unassigned     | na      | 88  |
| YFR025C   | HIS2    | 2  | pfam           | PF02811 | 247 |
| YFR026C   | YFR026C | 1  | unassigned     | na      | 169 |
| YFR027W   | ECO1    | 1  | msa            | na      | 149 |
| YFR027W   | ECO1    | 2  | msa            | na      | 132 |
| YFR028C   | CDC14   | 1  | msa            | na      | 85  |
| YFR028C   | CDC14   | 2  | psiblast       | 1larA_  | 392 |
| YFR028C   | CDC14   | 3  | unassigned     | na      | 74  |
| YFR029W   | PTR3    | 1  | unassigned     | na      | 678 |
| YFR030W   | MET10   | 1  | psiblast       | 1b0pA_  | 373 |
| YFR030W   | MET10   | 2  | psiblast       | 1b0pA_  | 270 |
| YFR030W   | MET10   | 3  | psiblast       | 1amoA_  | 97  |
| YFR030W   | MET10   | 4  | psiblast       | 1amoA_  | 295 |
| YFR031C   | SMC2    | 1  | psiblast       | 1ii8A_  | 213 |
| YFR031C   | SMC2    | 2  | psiblast       | 2tmaA_  | 69  |
| YFR031C   | SMC2    | 3  | psiblast       | 2tmaA_  | 82  |
| YFR031C   | SMC2    | 4  | psiblast       | 2tmaA_  | 62  |
| YFR031C   | SMC2    | 5  | psiblast       | 2tmaA_  | 61  |
| YFR031C   | SMC2    | 6  | psiblast       | 1gxIA_  | 73  |
| YFR031C   | SMC2    | 7  | psiblast       | 1gxIA_  | 64  |
| YFR031C   | SMC2    | 8  | psiblast       | 1gxIA_  | 63  |
| YFR031C   | SMC2    | 9  | psiblast       | 1i84S_  | 294 |
| YFR031C   | SMC2    | 10 | psiblast       | 1e69A_  | 189 |
| YFR031C-A | RPL2A   | 1  | psiblast       | 1k5yB_  | 72  |
| YFR031C-A | RPL2A   | 2  | psiblast       | 1k5yB_  | 182 |
| YFR032C   | YFR032C | 1  | psiblast       | 1ha1__  | 106 |
| YFR032C   | YFR032C | 2  | psiblast       | 1ha1__  | 183 |

|           |           |   |                |         |     |
|-----------|-----------|---|----------------|---------|-----|
| YFR032C-A | RPL29     | 1 | pfam           | PF01779 | 59  |
| YFR033C   | QCR6      | 1 | unassigned     | na      | 63  |
| YFR033C   | QCR6      | 2 | psiblast       | 1ezvH_  | 84  |
| YFR034C   | PHO4      | 1 | unassigned     | na      | 247 |
| YFR034C   | PHO4      | 2 | psiblast       | 1a0aA_  | 65  |
| YFR035C   | YFR035C   | 1 | unassigned     | na      | 114 |
| YFR036W   | CDC26     | 1 | unassigned     | na      | 124 |
| YFR036W-A | YFR036W-A | 1 | unassigned     | na      | 216 |
| YFR037C   | RSC8      | 1 | msa            | na      | 177 |
| YFR037C   | RSC8      | 2 | unassigned     | na      | 70  |
| YFR037C   | RSC8      | 3 | pfam           | PF00569 | 57  |
| YFR037C   | RSC8      | 4 | psiblast       | 1h8aC_  | 54  |
| YFR037C   | RSC8      | 5 | psiblast       | 1dg3A_  | 73  |
| YFR037C   | RSC8      | 6 | psiblast       | 1dg3A_  | 126 |
| YFR038W   | YFR038W   | 1 | unassigned     | na      | 68  |
| YFR038W   | YFR038W   | 2 | psiblast       | 1gm5A_  | 94  |
| YFR038W   | YFR038W   | 3 | psiblast       | 1gm5A_  | 260 |
| YFR038W   | YFR038W   | 4 | unassigned     | na      | 56  |
| YFR038W   | YFR038W   | 5 | psiblast       | 1hv8A_  | 300 |
| YFR039C   | YFR039C   | 1 | unassigned     | na      | 234 |
| YFR039C   | YFR039C   | 2 | fold_recogniti | 1jkyA   | 212 |
| YFR039C   | YFR039C   | 3 | fold_recogniti | 1jkyA   | 64  |
| YFR040W   | SAP155    | 1 | unassigned     | na      | 106 |
| YFR040W   | SAP155    | 2 | msa            | na      | 441 |
| YFR040W   | SAP155    | 3 | unassigned     | na      | 53  |
| YFR040W   | SAP155    | 4 | msa            | na      | 152 |
| YFR040W   | SAP155    | 5 | msa            | na      | 153 |
| YFR041C   | ERJ5      | 1 | psiblast       | 1bq0__  | 143 |
| YFR041C   | ERJ5      | 2 | psiblast       | 1exkA_  | 152 |
| YFR042W   | YFR042W   | 1 | unassigned     | na      | 200 |
| YFR043C   | YFR043C   | 1 | unassigned     | na      | 237 |
| YFR044C   | YFR044C   | 1 | psiblast       | 1cg2A_  | 312 |
| YFR044C   | YFR044C   | 2 | psiblast       | 1cg2A_  | 169 |
| YFR045W   | YFR045W   | 1 | unassigned     | na      | 85  |
| YFR045W   | YFR045W   | 2 | pfam           | PF00153 | 93  |
| YFR046C   | CNN1      | 1 | unassigned     | na      | 361 |
| YFR047C   | BNA6      | 1 | psiblast       | 1qapA_  | 128 |
| YFR047C   | BNA6      | 2 | psiblast       | 1qapA_  | 61  |
| YFR047C   | BNA6      | 3 | psiblast       | 1qapA_  | 106 |
| YFR048W   | RMD8      | 1 | unassigned     | na      | 124 |
| YFR048W   | RMD8      | 2 | msa            | na      | 150 |
| YFR048W   | RMD8      | 3 | unassigned     | na      | 85  |
| YFR048W   | RMD8      | 4 | pfam           | PF02582 | 303 |
| YFR049W   | YMR31     | 1 | unassigned     | na      | 123 |
| YFR050C   | PRE4      | 1 | psiblast       | 1g0uM_  | 266 |
| YFR051C   | RET2      | 1 | psiblast       | 1gw5S_  | 85  |
| YFR051C   | RET2      | 2 | psiblast       | 1gw5S_  | 92  |
| YFR051C   | RET2      | 3 | unassigned     | na      | 56  |

|           |           |   |                |         |     |
|-----------|-----------|---|----------------|---------|-----|
| YFR051C   | RET2      | 4 | psiblast       | 1gw5M_  | 313 |
| YFR052W   | RPN12     | 1 | unassigned     | na      | 94  |
| YFR052W   | RPN12     | 2 | msa            | na      | 180 |
| YFR053C   | HXK1      | 1 | psiblast       | 1ig8A_  | 107 |
| YFR053C   | HXK1      | 2 | psiblast       | 1ig8A_  | 378 |
| YFR054C   | YFR054C   | 1 | unassigned     | na      | 192 |
| YFR055W   | YFR055W   | 1 | psiblast       | 1cl2A_  | 340 |
| YFR056C   | YFR056C   | 1 | unassigned     | na      | 122 |
| YFR057W   | YFR057W   | 1 | unassigned     | na      | 151 |
| YGL001C   | ERG26     | 1 | psiblast       | 1i3kA_  | 349 |
| YGL002W   | ERP6      | 1 | pfam           | PF01105 | 216 |
| YGL003C   | CDH1      | 1 | msa            | na      | 120 |
| YGL003C   | CDH1      | 2 | psiblast       | 1gxrA_  | 134 |
| YGL003C   | CDH1      | 3 | psiblast       | 1gg2B_  | 312 |
| YGL004C   | RPN14     | 1 | psiblast       | 1erjA_  | 417 |
| YGL005C   | COG7      | 1 | fold_recogniti | 1qoyA   | 239 |
| YGL005C   | COG7      | 2 | fold_recogniti | 1qoyA   | 40  |
| YGL006W   | PMC1      | 1 | psiblast       | 1eulA_  | 234 |
| YGL006W   | PMC1      | 2 | psiblast       | 1eulA_  | 449 |
| YGL006W   | PMC1      | 3 | psiblast       | 1eulA_  | 203 |
| YGL006W   | PMC1      | 4 | psiblast       | 1eulA_  | 287 |
| YGL006W-A | YGL006W-A | 1 | unassigned     | na      | 36  |
| YGL007W   | YGL007W   | 1 | unassigned     | na      | 125 |
| YGL008C   | PMA1      | 1 | psiblast       | 1eulA_  | 210 |
| YGL008C   | PMA1      | 2 | psiblast       | 1eulA_  | 360 |
| YGL008C   | PMA1      | 3 | psiblast       | 1eulA_  | 198 |
| YGL008C   | PMA1      | 4 | psiblast       | 1eulA_  | 150 |
| YGL009C   | LEU1      | 1 | psiblast       | 5acn__  | 550 |
| YGL009C   | LEU1      | 2 | psiblast       | 5acn__  | 229 |
| YGL010W   | YGL010W   | 1 | unassigned     | na      | 174 |
| YGL011C   | SCL1      | 1 | psiblast       | 1jd2G_  | 252 |
| YGL012W   | ERG4      | 1 | pfam           | PF01222 | 473 |
| YGL013C   | PDR1      | 1 | psiblast       | 1d66A_  | 111 |
| YGL013C   | PDR1      | 2 | unassigned     | na      | 309 |
| YGL013C   | PDR1      | 3 | msa            | na      | 154 |
| YGL013C   | PDR1      | 4 | unassigned     | na      | 494 |
| YGL014W   | PUF4      | 1 | unassigned     | na      | 89  |
| YGL014W   | PUF4      | 2 | psiblast       | 1deqA_  | 127 |
| YGL014W   | PUF4      | 3 | fold_recogniti | 1deqA   | 230 |
| YGL014W   | PUF4      | 4 | unassigned     | na      | 75  |
| YGL014W   | PUF4      | 5 | psiblast       | 1ib2A_  | 152 |
| YGL014W   | PUF4      | 6 | psiblast       | 1ib2A_  | 103 |
| YGL014W   | PUF4      | 7 | psiblast       | 1ib2A_  | 112 |
| YGL015C   | YGL015C   | 1 | unassigned     | na      | 130 |
| YGL016W   | KAP122    | 1 | unassigned     | na      | 393 |
| YGL016W   | KAP122    | 2 | msa            | na      | 688 |
| YGL017W   | ATE1      | 1 | msa            | na      | 353 |
| YGL017W   | ATE1      | 2 | unassigned     | na      | 150 |

|         |         |   |                |         |     |
|---------|---------|---|----------------|---------|-----|
| YGL018C | JAC1    | 1 | psiblast       | 1fpoA_  | 71  |
| YGL018C | JAC1    | 2 | psiblast       | 1fpoA_  | 113 |
| YGL019W | CKB1    | 1 | psiblast       | 1jwhC_  | 114 |
| YGL019W | CKB1    | 2 | psiblast       | 1jwhC_  | 164 |
| YGL020C | MDM39   | 1 | unassigned     | na      | 235 |
| YGL021W | ALK1    | 1 | unassigned     | na      | 454 |
| YGL021W | ALK1    | 2 | psiblast       | 1cdkA_  | 95  |
| YGL021W | ALK1    | 3 | psiblast       | 1cdkA_  | 211 |
| YGL022W | STT3    | 1 | pfam           | PF02516 | 660 |
| YGL022W | STT3    | 2 | unassigned     | na      | 58  |
| YGL023C | PIB2    | 1 | psiblast       | 1i84S_  | 364 |
| YGL023C | PIB2    | 2 | unassigned     | na      | 82  |
| YGL023C | PIB2    | 3 | psiblast       | 1vfyA_  | 129 |
| YGL023C | PIB2    | 4 | unassigned     | na      | 60  |
| YGL024W | YGL024W | 1 | unassigned     | na      | 111 |
| YGL025C | PGD1    | 1 | fold_recogniti | 1i3qA   | 431 |
| YGL026C | TRP5    | 1 | psiblast       | 1geqA_  | 280 |
| YGL026C | TRP5    | 2 | psiblast       | 1a5aB_  | 188 |
| YGL026C | TRP5    | 3 | psiblast       | 1a5aB_  | 239 |
| YGL027C | CWH41   | 1 | pfam           | PF03200 | 833 |
| YGL028C | SCW11   | 1 | fold_recogniti | 1m2vB   | 281 |
| YGL028C | SCW11   | 2 | psiblast       | 1ghsA_  | 85  |
| YGL028C | SCW11   | 3 | psiblast       | 1ghsA_  | 94  |
| YGL028C | SCW11   | 4 | psiblast       | 1ghsA_  | 82  |
| YGL029W | CGR1    | 1 | pfam           | PF03879 | 120 |
| YGL030W | RPL30   | 1 | psiblast       | 1ck2A_  | 105 |
| YGL031C | RPL24A  | 1 | psiblast       | 1k5yS_  | 72  |
| YGL031C | RPL24A  | 2 | unassigned     | na      | 83  |
| YGL032C | AGA2    | 1 | unassigned     | na      | 87  |
| YGL033W | HOP2    | 1 | fold_recogniti | 1ggqA   | 185 |
| YGL034C | YGL034C | 1 | unassigned     | na      | 121 |
| YGL035C | MIG1    | 1 | psiblast       | 1lu6A_  | 89  |
| YGL035C | MIG1    | 2 | psiblast       | 1lu6A_  | 104 |
| YGL035C | MIG1    | 3 | msa            | na      | 61  |
| YGL035C | MIG1    | 4 | msa            | na      | 179 |
| YGL035C | MIG1    | 5 | unassigned     | na      | 71  |
| YGL036W | YGL036W | 1 | fold_recogniti | 1ej6B   | 600 |
| YGL036W | YGL036W | 2 | unassigned     | na      | 57  |
| YGL036W | YGL036W | 3 | fold_recogniti | 1i3qA   | 252 |
| YGL037C | PNC1    | 1 | psiblast       | 1ilwA_  | 216 |
| YGL038C | OCH1    | 1 | unassigned     | na      | 58  |
| YGL038C | OCH1    | 2 | msa            | na      | 159 |
| YGL038C | OCH1    | 3 | unassigned     | na      | 263 |
| YGL039W | YGL039W | 1 | psiblast       | 1keuA_  | 164 |
| YGL039W | YGL039W | 2 | psiblast       | 1keuA_  | 120 |
| YGL039W | YGL039W | 3 | psiblast       | 1keuA_  | 64  |
| YGL040C | HEM2    | 1 | psiblast       | 1ylvA_  | 342 |
| YGL041C | YGL041C | 1 | unassigned     | na      | 104 |

|         |         |   |                |         |     |
|---------|---------|---|----------------|---------|-----|
| YGL042C | YGL042C | 1 | unassigned     | na      | 101 |
| YGL043W | DST1    | 1 | psiblast       | 1eo0A_  | 103 |
| YGL043W | DST1    | 2 | psiblast       | 1enwA_  | 87  |
| YGL043W | DST1    | 3 | fold_recogniti | 1enwA   | 68  |
| YGL043W | DST1    | 4 | psiblast       | 1tfi__  | 51  |
| YGL044C | RNA15   | 1 | psiblast       | 1fxIA_  | 96  |
| YGL044C | RNA15   | 2 | psiblast       | 1fxIA_  | 106 |
| YGL044C | RNA15   | 3 | psiblast       | 1g9IA_  | 94  |
| YGL045W | RIM8    | 1 | msa            | na      | 229 |
| YGL046W | 2122    | 1 | psiblast       | 1jsyA_  | 194 |
| YGL046W | 2122    | 2 | psiblast       | 1jsyA_  | 68  |
| YGL047W | YGL047W | 1 | psiblast       | 1f0kA_  | 202 |
| YGL048C | RPT6    | 1 | psiblast       | 1e32A_  | 144 |
| YGL048C | RPT6    | 2 | psiblast       | 1e32A_  | 174 |
| YGL048C | RPT6    | 3 | psiblast       | 1e32A_  | 87  |
| YGL049C | TIF4632 | 1 | unassigned     | na      | 110 |
| YGL049C | TIF4632 | 2 | fold_recogniti | 1l8mA   | 56  |
| YGL049C | TIF4632 | 3 | fold_recogniti | 1jv2B   | 248 |
| YGL049C | TIF4632 | 4 | fold_recogniti | 1jv2B   | 58  |
| YGL049C | TIF4632 | 5 | fold_recogniti | 1i3qA   | 83  |
| YGL049C | TIF4632 | 6 | psiblast       | 1hu3A_  | 136 |
| YGL049C | TIF4632 | 7 | psiblast       | 1hu3A_  | 160 |
| YGL049C | TIF4632 | 8 | unassigned     | na      | 63  |
| YGL050W | YGL050W | 1 | pfam           | PF02676 | 273 |
| YGL051W | MST27   | 1 | pfam           | PF00674 | 234 |
| YGL052W | YGL052W | 1 | unassigned     | na      | 101 |
| YGL053W | PRM8    | 1 | pfam           | PF00674 | 237 |
| YGL054C | ERV14   | 1 | pfam           | PF03311 | 138 |
| YGL055W | OLE1    | 1 | msa            | na      | 96  |
| YGL055W | OLE1    | 2 | pfam           | PF00487 | 302 |
| YGL055W | OLE1    | 3 | psiblast       | 1iccA_  | 112 |
| YGL056C | SDS23   | 1 | psiblast       | 1zfyA_  | 324 |
| YGL056C | SDS23   | 2 | psiblast       | 1zfyA_  | 142 |
| YGL056C | SDS23   | 3 | unassigned     | na      | 61  |
| YGL057C | YGL057C | 1 | unassigned     | na      | 287 |
| YGL058W | RAD6    | 1 | psiblast       | 1ayzA_  | 172 |
| YGL059W | YGL059W | 1 | psiblast       | 1gkxA_  | 445 |
| YGL060W | YBP2    | 1 | fold_recogniti | 1bgxT   | 57  |
| YGL060W | YBP2    | 2 | fold_recogniti | 1bgxT   | 51  |
| YGL060W | YBP2    | 3 | fold_recogniti | 1bgxT   | 480 |
| YGL060W | YBP2    | 4 | fold_recogniti | 1bgxT   | 53  |
| YGL061C | DUO1    | 1 | unassigned     | na      | 247 |
| YGL062W | PYC1    | 1 | psiblast       | 1lSrA_  | 128 |
| YGL062W | PYC1    | 2 | psiblast       | 1lSrA_  | 80  |
| YGL062W | PYC1    | 3 | psiblast       | 1lSrA_  | 136 |
| YGL062W | PYC1    | 4 | psiblast       | 1lSrA_  | 164 |
| YGL062W | PYC1    | 5 | fold_recogniti | 1lt7A   | 385 |
| YGL062W | PYC1    | 6 | fold_recogniti | 1dhpA   | 121 |

|         |         |   |                |         |     |
|---------|---------|---|----------------|---------|-----|
| YGL062W | PYC1    | 7 | unassigned     | na      | 71  |
| YGL062W | PYC1    | 8 | psiblast       | 1dczA_  | 93  |
| YGL063W | PUS2    | 1 | psiblast       | 1dj0A_  | 124 |
| YGL063W | PUS2    | 2 | psiblast       | 1dj0A_  | 91  |
| YGL063W | PUS2    | 3 | pfam           | PF01416 | 155 |
| YGL064C | MRH4    | 1 | unassigned     | na      | 105 |
| YGL064C | MRH4    | 2 | psiblast       | 1hv8A_  | 237 |
| YGL064C | MRH4    | 3 | psiblast       | 1hv8A_  | 165 |
| YGL064C | MRH4    | 4 | fold_recogniti | 1fuuA   | 54  |
| YGL065C | ALG2    | 1 | fold_recogniti | 1iirA   | 212 |
| YGL065C | ALG2    | 2 | fold_recogniti | 1iirA   | 76  |
| YGL065C | ALG2    | 3 | fold_recogniti | 1iirA   | 215 |
| YGL066W | SGF73   | 1 | fold_recogniti | 1l8mA   | 110 |
| YGL066W | SGF73   | 2 | fold_recogniti | 1l8mA   | 79  |
| YGL066W | SGF73   | 3 | fold_recogniti | 1l8mA   | 69  |
| YGL066W | SGF73   | 4 | fold_recogniti | 1l8mA   | 74  |
| YGL066W | SGF73   | 5 | unassigned     | na      | 325 |
| YGL067W | NPY1    | 1 | msa            | na      | 190 |
| YGL067W | NPY1    | 2 | psiblast       | 1g0sA_  | 194 |
| YGL068W | YGL068W | 1 | unassigned     | na      | 110 |
| YGL068W | YGL068W | 2 | psiblast       | 1ctf__  | 84  |
| YGL069C | SRF3    | 1 | unassigned     | na      | 154 |
| YGL070C | RPB9    | 1 | psiblast       | 1k83I_  | 45  |
| YGL070C | RPB9    | 2 | psiblast       | 1k83I_  | 77  |
| YGL071W | RCS1    | 1 | unassigned     | na      | 374 |
| YGL071W | RCS1    | 2 | fold_recogniti | 1qhbA   | 316 |
| YGL072C | YGL072C | 1 | unassigned     | na      | 119 |
| YGL073W | HSF1    | 1 | unassigned     | na      | 145 |
| YGL073W | HSF1    | 2 | psiblast       | 3htsB_  | 115 |
| YGL073W | HSF1    | 3 | fold_recogniti | 3htsB   | 59  |
| YGL073W | HSF1    | 4 | fold_recogniti | 1i3qA   | 514 |
| YGL074C | YGL074C | 1 | unassigned     | na      | 108 |
| YGL075C | MPS2    | 1 | unassigned     | na      | 387 |
| YGL076C | RPL7A   | 1 | unassigned     | na      | 77  |
| YGL076C | RPL7A   | 2 | psiblast       | 1k5yF_  | 167 |
| YGL077C | HNM1    | 1 | pfam           | PF00324 | 563 |
| YGL078C | DBP3    | 1 | unassigned     | na      | 78  |
| YGL078C | DBP3    | 2 | psiblast       | 1hv8A_  | 246 |
| YGL078C | DBP3    | 3 | psiblast       | 1hv8A_  | 199 |
| YGL079W | YGL079W | 1 | unassigned     | na      | 218 |
| YGL080W | FMP37   | 1 | pfam           | PF03650 | 130 |
| YGL081W | YGL081W | 1 | pfam           | PF00498 | 152 |
| YGL081W | YGL081W | 2 | unassigned     | na      | 168 |
| YGL082W | YGL082W | 1 | msa            | na      | 287 |
| YGL082W | YGL082W | 2 | unassigned     | na      | 94  |
| YGL083W | SCY1    | 1 | psiblast       | 1fotA_  | 145 |
| YGL083W | SCY1    | 2 | psiblast       | 1fotA_  | 239 |
| YGL083W | SCY1    | 3 | psiblast       | 1b3uA_  | 189 |

|         |            |                  |         |     |
|---------|------------|------------------|---------|-----|
| YGL083W | SCY1       | 4 unassigned     | na      | 231 |
| YGL084C | GUP1       | 1 msa            | na      | 123 |
| YGL084C | GUP1       | 2 msa            | na      | 437 |
| YGL085W | YGL085W    | 1 unassigned     | na      | 84  |
| YGL085W | YGL085W    | 2 psiblast       | 1ey7A_  | 190 |
| YGL086W | MAD1       | 1 psiblast       | 1i84S_  | 275 |
| YGL086W | MAD1       | 2 psiblast       | 2tmaA_  | 89  |
| YGL086W | MAD1       | 3 psiblast       | 2tmaA_  | 82  |
| YGL086W | MAD1       | 4 psiblast       | 2tmaA_  | 62  |
| YGL086W | MAD1       | 5 psiblast       | 2tmaA_  | 111 |
| YGL086W | MAD1       | 6 msa            | na      | 130 |
| YGL087C | MMS2       | 1 psiblast       | 1jatB_  | 137 |
| YGL088W | YGL088W    | 1 unassigned     | na      | 121 |
| YGL089C | MF(ALPHA)2 | 1 unassigned     | na      | 120 |
| YGL090W | LIF1       | 1 unassigned     | na      | 421 |
| YGL091C | NBP35      | 1 psiblast       | 1g3qA_  | 328 |
| YGL092W | NUP145     | 1 psiblast       | 1deqA_  | 156 |
| YGL092W | NUP145     | 2 msa            | na      | 234 |
| YGL092W | NUP145     | 3 unassigned     | na      | 659 |
| YGL092W | NUP145     | 4 msa            | na      | 185 |
| YGL092W | NUP145     | 5 unassigned     | na      | 83  |
| YGL093W | SPC105     | 1 fold_recogniti | 1i3qA   | 371 |
| YGL093W | SPC105     | 2 fold_recogniti | 1ldvA   | 112 |
| YGL093W | SPC105     | 3 psiblast       | 1i84S_  | 281 |
| YGL093W | SPC105     | 4 unassigned     | na      | 153 |
| YGL094C | PAN2       | 1 psiblast       | 1gg2B_  | 395 |
| YGL094C | PAN2       | 2 unassigned     | na      | 73  |
| YGL094C | PAN2       | 3 msa            | na      | 427 |
| YGL094C | PAN2       | 4 fold_recogniti | 1fxxA   | 220 |
| YGL095C | VPS45      | 1 psiblast       | 1fvfA_  | 136 |
| YGL095C | VPS45      | 2 psiblast       | 1fvfA_  | 202 |
| YGL095C | VPS45      | 3 psiblast       | 1fvfA_  | 112 |
| YGL095C | VPS45      | 4 psiblast       | 1fvfA_  | 127 |
| YGL096W | TOS8       | 1 msa            | na      | 158 |
| YGL096W | TOS8       | 2 psiblast       | 1b72B_  | 118 |
| YGL097W | SRM1       | 1 psiblast       | 1a12A_  | 482 |
| YGL098W | USE1       | 1 fold_recogniti | 1jchA   | 245 |
| YGL099W | LSG1       | 1 msa            | na      | 102 |
| YGL099W | LSG1       | 2 psiblast       | 1g7sA_  | 219 |
| YGL099W | LSG1       | 3 psiblast       | 1egaA_  | 191 |
| YGL099W | LSG1       | 4 psiblast       | 1egaA_  | 128 |
| YGL100W | SEH1       | 1 psiblast       | 1erjA_  | 349 |
| YGL101W | YGL101W    | 1 pfam           | PF01966 | 215 |
| YGL102C | YGL102C    | 1 unassigned     | na      | 142 |
| YGL103W | RPL28      | 1 psiblast       | 1k5yV_  | 57  |
| YGL103W | RPL28      | 2 psiblast       | 1k5yV_  | 92  |
| YGL104C | VPS73      | 1 psiblast       | 1ja5A_  | 440 |
| YGL104C | VPS73      | 2 psiblast       | 1ja5A_  | 46  |

|         |         |   |                |         |     |
|---------|---------|---|----------------|---------|-----|
| YGL105W | ARC1    | 1 | psiblast       | 1jlvA_  | 139 |
| YGL105W | ARC1    | 2 | unassigned     | na      | 59  |
| YGL105W | ARC1    | 3 | psiblast       | 1eujA_  | 178 |
| YGL106W | MLC1    | 1 | psiblast       | 1ggwA_  | 85  |
| YGL106W | MLC1    | 2 | psiblast       | 1ggwA_  | 64  |
| YGL107C | RMD9    | 1 | unassigned     | na      | 124 |
| YGL107C | RMD9    | 2 | fold_recogniti | 1qoyA   | 271 |
| YGL107C | RMD9    | 3 | unassigned     | na      | 251 |
| YGL108C | YGL108C | 1 | unassigned     | na      | 140 |
| YGL109W | YGL109W | 1 | unassigned     | na      | 107 |
| YGL110C | CUE3    | 1 | unassigned     | na      | 314 |
| YGL110C | CUE3    | 2 | pfam           | PF02845 | 79  |
| YGL110C | CUE3    | 3 | unassigned     | na      | 231 |
| YGL111W | NSA1    | 1 | unassigned     | na      | 101 |
| YGL111W | NSA1    | 2 | fold_recogniti | 1scgB   | 362 |
| YGL112C | TAF6    | 1 | psiblast       | 1tafB_  | 84  |
| YGL112C | TAF6    | 2 | unassigned     | na      | 110 |
| YGL112C | TAF6    | 3 | fold_recogniti | 1wq1G   | 154 |
| YGL112C | TAF6    | 4 | fold_recogniti | 1wq1G   | 168 |
| YGL113W | SLD3    | 1 | unassigned     | na      | 490 |
| YGL113W | SLD3    | 2 | msa            | na      | 178 |
| YGL114W | YGL114W | 1 | msa            | na      | 519 |
| YGL114W | YGL114W | 2 | msa            | na      | 206 |
| YGL115W | SNF4    | 1 | psiblast       | 1jr1A_  | 322 |
| YGL116W | CDC20   | 1 | psiblast       | 1c5kA_  | 177 |
| YGL116W | CDC20   | 2 | psiblast       | 1c5kA_  | 260 |
| YGL116W | CDC20   | 3 | psiblast       | 1erjA_  | 173 |
| YGL117W | YGL117W | 1 | unassigned     | na      | 265 |
| YGL118C | YGL118C | 1 | unassigned     | na      | 145 |
| YGL119W | ABC1    | 1 | unassigned     | na      | 104 |
| YGL119W | ABC1    | 2 | psiblast       | 1qcfA_  | 76  |
| YGL119W | ABC1    | 3 | psiblast       | 1a06__  | 128 |
| YGL119W | ABC1    | 4 | psiblast       | 1a06__  | 193 |
| YGL120C | PRP43   | 1 | unassigned     | na      | 70  |
| YGL120C | PRP43   | 2 | psiblast       | 1hv8A_  | 203 |
| YGL120C | PRP43   | 3 | psiblast       | 1hv8A_  | 180 |
| YGL120C | PRP43   | 4 | fold_recogniti | 1jr3D   | 70  |
| YGL120C | PRP43   | 5 | fold_recogniti | 1jr3D   | 143 |
| YGL120C | PRP43   | 6 | msa            | na      | 101 |
| YGL121C | GPG1    | 1 | unassigned     | na      | 126 |
| YGL122C | NAB2    | 1 | fold_recogniti | 1i3qA   | 237 |
| YGL122C | NAB2    | 2 | fold_recogniti | 1jv2B   | 288 |
| YGL123W | RPS2    | 1 | unassigned     | na      | 61  |
| YGL123W | RPS2    | 2 | psiblast       | 1k5xE_  | 193 |
| YGL124C | MON1    | 1 | unassigned     | na      | 113 |
| YGL124C | MON1    | 2 | fold_recogniti | 1gw5S   | 207 |
| YGL124C | MON1    | 3 | unassigned     | na      | 92  |
| YGL124C | MON1    | 4 | msa            | na      | 232 |



|         |         |    |                |         |     |
|---------|---------|----|----------------|---------|-----|
| YGL125W | MET13   | 1  | psiblast       | 1b5tA_  | 325 |
| YGL125W | MET13   | 2  | msa            | na      | 274 |
| YGL126W | SCS3    | 1  | msa            | na      | 127 |
| YGL126W | SCS3    | 2  | fold_recogniti | 16vpA   | 139 |
| YGL126W | SCS3    | 3  | fold_recogniti | 16vpA   | 114 |
| YGL127C | SOH1    | 1  | unassigned     | na      | 127 |
| YGL128C | CWC23   | 1  | unassigned     | na      | 65  |
| YGL128C | CWC23   | 2  | psiblast       | 1xbl__  | 118 |
| YGL128C | CWC23   | 3  | unassigned     | na      | 164 |
| YGL129C | RSM23   | 1  | unassigned     | na      | 112 |
| YGL129C | RSM23   | 2  | msa            | na      | 286 |
| YGL129C | RSM23   | 3  | unassigned     | na      | 90  |
| YGL130W | CEG1    | 1  | psiblast       | 1ckmA_  | 174 |
| YGL130W | CEG1    | 2  | psiblast       | 1ckmA_  | 79  |
| YGL130W | CEG1    | 3  | psiblast       | 1ckmA_  | 85  |
| YGL130W | CEG1    | 4  | fold_recogniti | 1ckmA   | 121 |
| YGL131C | SNT2    | 1  | unassigned     | na      | 102 |
| YGL131C | SNT2    | 2  | pfam           | PF01426 | 170 |
| YGL131C | SNT2    | 3  | psiblast       | 1fpOA_  | 140 |
| YGL131C | SNT2    | 4  | msa            | na      | 68  |
| YGL131C | SNT2    | 5  | unassigned     | na      | 76  |
| YGL131C | SNT2    | 6  | pfam           | PF00249 | 72  |
| YGL131C | SNT2    | 7  | unassigned     | na      | 128 |
| YGL131C | SNT2    | 8  | msa            | na      | 280 |
| YGL131C | SNT2    | 9  | pfam           | PF00628 | 83  |
| YGL131C | SNT2    | 10 | msa            | na      | 190 |
| YGL131C | SNT2    | 11 | pfam           | PF00320 | 94  |
| YGL132W | YGL132W | 1  | unassigned     | na      | 111 |
| YGL133W | ITC1    | 1  | unassigned     | na      | 119 |
| YGL133W | ITC1    | 2  | msa            | na      | 294 |
| YGL133W | ITC1    | 3  | pfam           | PF02791 | 93  |
| YGL133W | ITC1    | 4  | unassigned     | na      | 758 |
| YGL134W | PCL10   | 1  | unassigned     | na      | 206 |
| YGL134W | PCL10   | 2  | msa            | na      | 227 |
| YGL135W | RPL1B   | 1  | psiblast       | 1k5yA_  | 127 |
| YGL135W | RPL1B   | 2  | psiblast       | 1k5yA_  | 90  |
| YGL136C | MRM2    | 1  | psiblast       | 1eizA_  | 226 |
| YGL136C | MRM2    | 2  | fold_recogniti | 1eizA   | 94  |
| YGL137W | SEC27   | 1  | psiblast       | 1erjA_  | 311 |
| YGL137W | SEC27   | 2  | msa            | na      | 66  |
| YGL137W | SEC27   | 3  | psiblast       | 1c5kA_  | 252 |
| YGL137W | SEC27   | 4  | fold_recogniti | 1b89A   | 183 |
| YGL137W | SEC27   | 5  | msa            | na      | 77  |
| YGL138C | YGL138C | 1  | unassigned     | na      | 345 |
| YGL139W | YGL139W | 1  | msa            | na      | 192 |
| YGL139W | YGL139W | 2  | unassigned     | na      | 109 |
| YGL139W | YGL139W | 3  | msa            | na      | 278 |
| YGL139W | YGL139W | 4  | msa            | na      | 170 |

|         |         |   |                |         |      |
|---------|---------|---|----------------|---------|------|
| YGL139W | YGL139W | 5 | unassigned     | na      | 53   |
| YGL140C | YGL140C | 1 | unassigned     | na      | 576  |
| YGL140C | YGL140C | 2 | msa            | na      | 355  |
| YGL140C | YGL140C | 3 | unassigned     | na      | 288  |
| YGL141W | HUL5    | 1 | unassigned     | na      | 323  |
| YGL141W | HUL5    | 2 | msa            | na      | 135  |
| YGL141W | HUL5    | 3 | unassigned     | na      | 91   |
| YGL141W | HUL5    | 4 | psiblast       | 1c4zA_  | 47   |
| YGL141W | HUL5    | 5 | psiblast       | 1c4zA_  | 142  |
| YGL141W | HUL5    | 6 | psiblast       | 1c4zA_  | 172  |
| YGL142C | GPI10   | 1 | pfam           | PF03901 | 616  |
| YGL143C | MRF1    | 1 | psiblast       | 1gqeA_  | 143  |
| YGL143C | MRF1    | 2 | psiblast       | 1gqeA_  | 182  |
| YGL143C | MRF1    | 3 | psiblast       | 1gqeA_  | 88   |
| YGL144C | ROG1    | 1 | unassigned     | na      | 176  |
| YGL144C | ROG1    | 2 | psiblast       | 1hqdA_  | 218  |
| YGL144C | ROG1    | 3 | unassigned     | na      | 291  |
| YGL145W | TIP20   | 1 | fold_recogniti | 1h6kA   | 221  |
| YGL145W | TIP20   | 2 | fold_recogniti | 1h6kA   | 118  |
| YGL145W | TIP20   | 3 | fold_recogniti | 1h6kA   | 93   |
| YGL145W | TIP20   | 4 | fold_recogniti | 1h6kA   | 198  |
| YGL145W | TIP20   | 5 | unassigned     | na      | 71   |
| YGL146C | YGL146C | 1 | unassigned     | na      | 311  |
| YGL147C | RPL9A   | 1 | psiblast       | 1k5yH_  | 84   |
| YGL147C | RPL9A   | 2 | psiblast       | 1k5yH_  | 107  |
| YGL148W | ARO2    | 1 | fold_recogniti | 1fw8A   | 376  |
| YGL149W | YGL149W | 1 | unassigned     | na      | 101  |
| YGL150C | INO80   | 1 | psiblast       | 1i84S_  | 420  |
| YGL150C | INO80   | 2 | unassigned     | na      | 217  |
| YGL150C | INO80   | 3 | fold_recogniti | 1gm5A   | 319  |
| YGL150C | INO80   | 4 | fold_recogniti | 1gm5A   | 226  |
| YGL150C | INO80   | 5 | psiblast       | 1hv8A_  | 232  |
| YGL150C | INO80   | 6 | unassigned     | na      | 75   |
| YGL151W | NUT1    | 1 | unassigned     | na      | 1132 |
| YGL152C | YGL152C | 1 | unassigned     | na      | 225  |
| YGL153W | PEX14   | 1 | msa            | na      | 124  |
| YGL153W | PEX14   | 2 | psiblast       | 1i84S_  | 129  |
| YGL153W | PEX14   | 3 | unassigned     | na      | 88   |
| YGL154C | LYS5    | 1 | psiblast       | 1qrOA_  | 113  |
| YGL154C | LYS5    | 2 | psiblast       | 1qrOA_  | 159  |
| YGL155W | CDC43   | 1 | psiblast       | 1dceB_  | 198  |
| YGL155W | CDC43   | 2 | psiblast       | 1dceB_  | 178  |
| YGL156W | AMS1    | 1 | unassigned     | na      | 191  |
| YGL156W | AMS1    | 2 | psiblast       | 1hwwA_  | 489  |
| YGL156W | AMS1    | 3 | fold_recogniti | 1htyA   | 286  |
| YGL156W | AMS1    | 4 | msa            | na      | 117  |
| YGL157W | YGL157W | 1 | psiblast       | 1keuA_  | 163  |
| YGL157W | YGL157W | 2 | psiblast       | 1keuA_  | 116  |

|         |         |   |                |         |     |
|---------|---------|---|----------------|---------|-----|
| YGL157W | YGL157W | 3 | psiblast       | 1keuA_  | 68  |
| YGL158W | RCK1    | 1 | unassigned     | na      | 94  |
| YGL158W | RCK1    | 2 | psiblast       | 1a06__  | 140 |
| YGL158W | RCK1    | 3 | psiblast       | 1a06__  | 223 |
| YGL158W | RCK1    | 4 | psiblast       | 1lj6A_  | 55  |
| YGL159W | YGL159W | 1 | unassigned     | na      | 60  |
| YGL159W | YGL159W | 2 | fold_recogniti | 1gpjA   | 223 |
| YGL159W | YGL159W | 3 | unassigned     | na      | 87  |
| YGL160W | YGL160W | 1 | msa            | na      | 175 |
| YGL160W | YGL160W | 2 | unassigned     | na      | 52  |
| YGL160W | YGL160W | 3 | psiblast       | 1cnf__  | 132 |
| YGL160W | YGL160W | 4 | psiblast       | 1cnf__  | 211 |
| YGL161C | YIP5    | 1 | unassigned     | na      | 202 |
| YGL161C | YIP5    | 2 | msa            | na      | 108 |
| YGL162W | SUT1    | 1 | unassigned     | na      | 299 |
| YGL163C | RAD54   | 1 | msa            | na      | 223 |
| YGL163C | RAD54   | 2 | fold_recogniti | 1gm5A   | 52  |
| YGL163C | RAD54   | 3 | fold_recogniti | 1gm5A   | 308 |
| YGL163C | RAD54   | 4 | psiblast       | 1hv8A_  | 57  |
| YGL163C | RAD54   | 5 | psiblast       | 1d9xA_  | 258 |
| YGL164C | YRB30   | 1 | unassigned     | na      | 216 |
| YGL164C | YRB30   | 2 | msa            | na      | 224 |
| YGL165C | YGL165C | 1 | unassigned     | na      | 192 |
| YGL166W | CUP2    | 1 | psiblast       | 1co4A_  | 75  |
| YGL166W | CUP2    | 2 | unassigned     | na      | 150 |
| YGL167C | PMR1    | 1 | psiblast       | 1eulA_  | 201 |
| YGL167C | PMR1    | 2 | psiblast       | 1eulA_  | 347 |
| YGL167C | PMR1    | 3 | psiblast       | 1eulA_  | 199 |
| YGL167C | PMR1    | 4 | psiblast       | 1eulA_  | 203 |
| YGL168W | HUR1    | 1 | unassigned     | na      | 110 |
| YGL169W | SUA5    | 1 | psiblast       | 1jcuA_  | 285 |
| YGL169W | SUA5    | 2 | msa            | na      | 141 |
| YGL170C | SPO74   | 1 | unassigned     | na      | 95  |
| YGL170C | SPO74   | 2 | fold_recogniti | 1iu4A   | 318 |
| YGL171W | ROK1    | 1 | unassigned     | na      | 95  |
| YGL171W | ROK1    | 2 | psiblast       | 1hv8A_  | 245 |
| YGL171W | ROK1    | 3 | psiblast       | 1hv8A_  | 157 |
| YGL171W | ROK1    | 4 | unassigned     | na      | 67  |
| YGL172W | NUP49   | 1 | psiblast       | 1deqA_  | 238 |
| YGL172W | NUP49   | 2 | fold_recogniti | 1dn1B   | 177 |
| YGL172W | NUP49   | 3 | fold_recogniti | 1dn1B   | 57  |
| YGL173C | KEM1    | 1 | pfam           | PF03159 | 231 |
| YGL173C | KEM1    | 2 | unassigned     | na      | 72  |
| YGL173C | KEM1    | 3 | msa            | na      | 411 |
| YGL173C | KEM1    | 4 | unassigned     | na      | 814 |
| YGL174W | BUD13   | 1 | unassigned     | na      | 74  |
| YGL174W | BUD13   | 2 | msa            | na      | 113 |
| YGL174W | BUD13   | 3 | unassigned     | na      | 79  |

|         |         |              |         |     |
|---------|---------|--------------|---------|-----|
| YGL175C | SAE2    | 1 unassigned | na      | 345 |
| YGL176C | YGL176C | 1 unassigned | na      | 554 |
| YGL177W | YGL177W | 1 unassigned | na      | 115 |
| YGL178W | MPT5    | 1 msa        | na      | 181 |
| YGL178W | MPT5    | 2 psiblast   | 1ib2A_  | 147 |
| YGL178W | MPT5    | 3 psiblast   | 1ib2A_  | 101 |
| YGL178W | MPT5    | 4 psiblast   | 1ib2A_  | 199 |
| YGL178W | MPT5    | 5 unassigned | na      | 231 |
| YGL179C | TOS3    | 1 psiblast   | 1ctpE_  | 318 |
| YGL179C | TOS3    | 2 psiblast   | 1ctpE_  | 121 |
| YGL179C | TOS3    | 3 unassigned | na      | 121 |
| YGL180W | ATG1    | 1 psiblast   | 1fotA_  | 91  |
| YGL180W | ATG1    | 2 psiblast   | 1fotA_  | 336 |
| YGL180W | ATG1    | 3 msa        | na      | 470 |
| YGL181W | GTS1    | 1 psiblast   | 1dcqA_  | 173 |
| YGL181W | GTS1    | 2 pfam       | PF00627 | 76  |
| YGL181W | GTS1    | 3 unassigned | na      | 147 |
| YGL182C | YGL182C | 1 unassigned | na      | 107 |
| YGL183C | MND1    | 1 unassigned | na      | 174 |
| YGL184C | STR3    | 1 psiblast   | 1ibjA_  | 279 |
| YGL184C | STR3    | 2 psiblast   | 1ibjA_  | 186 |
| YGL185C | YGL185C | 1 psiblast   | 1gdhA_  | 169 |
| YGL185C | YGL185C | 2 psiblast   | 1gdhA_  | 210 |
| YGL186C | TPN1    | 1 unassigned | na      | 68  |
| YGL186C | TPN1    | 2 pfam       | PF02133 | 511 |
| YGL187C | COX4    | 1 psiblast   | 1occF_  | 155 |
| YGL188C | YGL188C | 1 unassigned | na      | 57  |
| YGL189C | RPS26A  | 1 pfam       | PF01283 | 119 |
| YGL190C | CDC55   | 1 psiblast   | 1b9xA_  | 419 |
| YGL190C | CDC55   | 2 psiblast   | 1gxrA_  | 107 |
| YGL191W | COX13   | 1 psiblast   | 1occG_  | 129 |
| YGL192W | IME4    | 1 unassigned | na      | 295 |
| YGL192W | IME4    | 2 msa        | na      | 237 |
| YGL192W | IME4    | 3 unassigned | na      | 68  |
| YGL193C | YGL193C | 1 unassigned | na      | 103 |
| YGL194C | HOS2    | 1 psiblast   | 1c3pA_  | 185 |
| YGL194C | HOS2    | 2 psiblast   | 1c3pA_  | 185 |
| YGL194C | HOS2    | 3 unassigned | na      | 82  |
| YGL195W | GCN1    | 1 unassigned | na      | 191 |
| YGL195W | GCN1    | 2 msa        | na      | 291 |
| YGL195W | GCN1    | 3 unassigned | na      | 485 |
| YGL195W | GCN1    | 4 msa        | na      | 728 |
| YGL195W | GCN1    | 5 unassigned | na      | 114 |
| YGL195W | GCN1    | 6 msa        | na      | 342 |
| YGL195W | GCN1    | 7 msa        | na      | 437 |
| YGL195W | GCN1    | 8 unassigned | na      | 84  |
| YGL196W | YGL196W | 1 unassigned | na      | 165 |
| YGL197W | MDS3    | 1 unassigned | na      | 88  |

|         |         |   |                |         |     |
|---------|---------|---|----------------|---------|-----|
| YGL197W | MDS3    | 2 | psiblast       | 1gof__  | 246 |
| YGL197W | MDS3    | 3 | unassigned     | na      | 219 |
| YGL197W | MDS3    | 4 | msa            | na      | 240 |
| YGL197W | MDS3    | 5 | unassigned     | na      | 694 |
| YGL198W | YIP4    | 1 | msa            | na      | 140 |
| YGL198W | YIP4    | 2 | msa            | na      | 121 |
| YGL199C | YGL199C | 1 | unassigned     | na      | 156 |
| YGL200C | EMP24   | 1 | pfam           | PF01105 | 203 |
| YGL201C | MCM6    | 1 | unassigned     | na      | 94  |
| YGL201C | MCM6    | 2 | msa            | na      | 175 |
| YGL201C | MCM6    | 3 | pfam           | PF00493 | 177 |
| YGL201C | MCM6    | 4 | psiblast       | 1dbwA_  | 81  |
| YGL201C | MCM6    | 5 | psiblast       | 1g8pA_  | 232 |
| YGL201C | MCM6    | 6 | psiblast       | 1g8pA_  | 108 |
| YGL201C | MCM6    | 7 | unassigned     | na      | 150 |
| YGL202W | ARO8    | 1 | psiblast       | 1bkgA_  | 348 |
| YGL202W | ARO8    | 2 | psiblast       | 1bkgA_  | 152 |
| YGL203C | KEX1    | 1 | psiblast       | 1ac5__  | 286 |
| YGL203C | KEX1    | 2 | psiblast       | 1ac5__  | 125 |
| YGL203C | KEX1    | 3 | psiblast       | 1ac5__  | 94  |
| YGL203C | KEX1    | 4 | fold_recogniti | 1l8mA   | 85  |
| YGL203C | KEX1    | 5 | fold_recogniti | 1l8mA   | 70  |
| YGL203C | KEX1    | 6 | fold_recogniti | 1l8mA   | 69  |
| YGL204C | YGL204C | 1 | unassigned     | na      | 101 |
| YGL205W | POX1    | 1 | psiblast       | 1is2A_  | 465 |
| YGL205W | POX1    | 2 | psiblast       | 1is2A_  | 283 |
| YGL206C | CHC1    | 1 | psiblast       | 1bpoA_  | 176 |
| YGL206C | CHC1    | 2 | psiblast       | 1bpoA_  | 200 |
| YGL206C | CHC1    | 3 | psiblast       | 1bpoA_  | 122 |
| YGL206C | CHC1    | 4 | fold_recogniti | 1m9iA   | 63  |
| YGL206C | CHC1    | 5 | fold_recogniti | 1m9iA   | 245 |
| YGL206C | CHC1    | 6 | fold_recogniti | 1m9iA   | 200 |
| YGL206C | CHC1    | 7 | fold_recogniti | 1m9iA   | 71  |
| YGL206C | CHC1    | 8 | psiblast       | 1b89A_  | 473 |
| YGL206C | CHC1    | 9 | msa            | na      | 103 |
| YGL207W | SPT16   | 1 | psiblast       | 1az9__  | 171 |
| YGL207W | SPT16   | 2 | psiblast       | 1az9__  | 297 |
| YGL207W | SPT16   | 3 | unassigned     | na      | 55  |
| YGL207W | SPT16   | 4 | msa            | na      | 250 |
| YGL207W | SPT16   | 5 | unassigned     | na      | 145 |
| YGL207W | SPT16   | 6 | msa            | na      | 117 |
| YGL208W | SIP2    | 1 | unassigned     | na      | 97  |
| YGL208W | SIP2    | 2 | msa            | na      | 318 |
| YGL209W | MIG2    | 1 | psiblast       | 2gliA_  | 66  |
| YGL209W | MIG2    | 2 | psiblast       | 2gliA_  | 51  |
| YGL209W | MIG2    | 3 | unassigned     | na      | 85  |
| YGL209W | MIG2    | 4 | psiblast       | 1lu6A_  | 53  |
| YGL209W | MIG2    | 5 | psiblast       | 1lu6A_  | 127 |

|           |         |   |                |         |     |
|-----------|---------|---|----------------|---------|-----|
| YGL210W   | YPT32   | 1 | psiblast       | 1g17A_  | 222 |
| YGL211W   | NCS6    | 1 | psiblast       | 1gpmA_  | 193 |
| YGL212W   | VAM7    | 1 | psiblast       | 1kmdA_  | 121 |
| YGL212W   | VAM7    | 2 | psiblast       | 1sfcC_  | 102 |
| YGL212W   | VAM7    | 3 | psiblast       | 1l4aD_  | 93  |
| YGL213C   | SKI8    | 1 | psiblast       | 1gg2B_  | 397 |
| YGL214W   | YGL214W | 1 | unassigned     | na      | 162 |
| YGL215W   | CLG1    | 1 | unassigned     | na      | 89  |
| YGL215W   | CLG1    | 2 | msa            | na      | 224 |
| YGL215W   | CLG1    | 3 | unassigned     | na      | 139 |
| YGL216W   | KIP3    | 1 | unassigned     | na      | 101 |
| YGL216W   | KIP3    | 2 | psiblast       | 1gojA_  | 365 |
| YGL216W   | KIP3    | 3 | psiblast       | 1i84S_  | 339 |
| YGL217C   | YGL217C | 1 | unassigned     | na      | 113 |
| YGL218W   | SRF1    | 1 | unassigned     | na      | 216 |
| YGL219C   | MDM34   | 1 | msa            | na      | 277 |
| YGL219C   | MDM34   | 2 | unassigned     | na      | 182 |
| YGL220W   | YGL220W | 1 | pfam           | PF01722 | 120 |
| YGL221C   | NIF3    | 1 | pfam           | PF01784 | 288 |
| YGL222C   | EDC1    | 1 | unassigned     | na      | 175 |
| YGL223C   | COG1    | 1 | unassigned     | na      | 417 |
| YGL224C   | SDT1    | 1 | psiblast       | 1jud__  | 217 |
| YGL224C   | SDT1    | 2 | psiblast       | 1jud__  | 63  |
| YGL225W   | VRG4    | 1 | unassigned     | na      | 80  |
| YGL225W   | VRG4    | 2 | msa            | na      | 257 |
| YGL226C-A | OST5    | 1 | unassigned     | na      | 86  |
| YGL226W   | YGL226W | 1 | fold_recogniti | 1occD   | 123 |
| YGL227W   | VID30   | 1 | fold_recogniti | 1l8mA   | 127 |
| YGL227W   | VID30   | 2 | fold_recogniti | 1l8mA   | 73  |
| YGL227W   | VID30   | 3 | fold_recogniti | 1l8mA   | 79  |
| YGL227W   | VID30   | 4 | fold_recogniti | 1l8mA   | 70  |
| YGL227W   | VID30   | 5 | unassigned     | na      | 71  |
| YGL227W   | VID30   | 6 | msa            | na      | 252 |
| YGL227W   | VID30   | 7 | unassigned     | na      | 286 |
| YGL228W   | SHE10   | 1 | unassigned     | na      | 577 |
| YGL229C   | SAP4    | 1 | msa            | na      | 528 |
| YGL229C   | SAP4    | 2 | msa            | na      | 290 |
| YGL230C   | YGL230C | 1 | unassigned     | na      | 147 |
| YGL231C   | YGL231C | 1 | unassigned     | na      | 190 |
| YGL232W   | TAN1    | 1 | unassigned     | na      | 101 |
| YGL232W   | TAN1    | 2 | pfam           | PF02926 | 188 |
| YGL233W   | SEC15   | 1 | fold_recogniti | 1ddbA   | 76  |
| YGL233W   | SEC15   | 2 | fold_recogniti | 1av1A   | 215 |
| YGL233W   | SEC15   | 3 | unassigned     | na      | 88  |
| YGL233W   | SEC15   | 4 | fold_recogniti | 1b8fA   | 225 |
| YGL233W   | SEC15   | 5 | fold_recogniti | 1b8fA   | 171 |
| YGL233W   | SEC15   | 6 | unassigned     | na      | 135 |
| YGL234W   | ADE5,7  | 1 | psiblast       | 1gsoA_  | 98  |

|         |         |   |                |         |     |
|---------|---------|---|----------------|---------|-----|
| YGL234W | ADE5,7  | 2 | psiblast       | 1gsoA_  | 154 |
| YGL234W | ADE5,7  | 3 | psiblast       | 1gsoA_  | 193 |
| YGL234W | ADE5,7  | 4 | fold_recogniti | 1cliA   | 66  |
| YGL234W | ADE5,7  | 5 | psiblast       | 1cliA_  | 104 |
| YGL234W | ADE5,7  | 6 | psiblast       | 1cliA_  | 141 |
| YGL234W | ADE5,7  | 7 | psiblast       | 1cliA_  | 46  |
| YGL235W | YGL235W | 1 | unassigned     | na      | 178 |
| YGL236C | MTO1    | 1 | unassigned     | na      | 72  |
| YGL236C | MTO1    | 2 | psiblast       | 1ebdA_  | 137 |
| YGL236C | MTO1    | 3 | psiblast       | 1ebdA_  | 61  |
| YGL236C | MTO1    | 4 | unassigned     | na      | 61  |
| YGL236C | MTO1    | 5 | msa            | na      | 106 |
| YGL236C | MTO1    | 6 | msa            | na      | 242 |
| YGL237C | HAP2    | 1 | msa            | na      | 152 |
| YGL237C | HAP2    | 2 | pfam           | PF02045 | 113 |
| YGL238W | CSE1    | 1 | msa            | na      | 220 |
| YGL238W | CSE1    | 2 | msa            | na      | 591 |
| YGL238W | CSE1    | 3 | msa            | na      | 149 |
| YGL239C | YGL239C | 1 | unassigned     | na      | 104 |
| YGL240W | DOC1    | 1 | psiblast       | 1gqpA_  | 283 |
| YGL241W | KAP114  | 1 | msa            | na      | 704 |
| YGL241W | KAP114  | 2 | msa            | na      | 211 |
| YGL241W | KAP114  | 3 | unassigned     | na      | 89  |
| YGL242C | YGL242C | 1 | psiblast       | 1awcB_  | 88  |
| YGL242C | YGL242C | 2 | psiblast       | 1awcB_  | 93  |
| YGL243W | TAD1    | 1 | unassigned     | na      | 69  |
| YGL243W | TAD1    | 2 | pfam           | PF02137 | 331 |
| YGL244W | RTF1    | 1 | msa            | na      | 230 |
| YGL244W | RTF1    | 2 | pfam           | PF03126 | 120 |
| YGL244W | RTF1    | 3 | unassigned     | na      | 208 |
| YGL245W | GSN1    | 1 | msa            | na      | 128 |
| YGL245W | GSN1    | 2 | psiblast       | 1iq0A_  | 65  |
| YGL245W | GSN1    | 3 | psiblast       | 1euqA_  | 253 |
| YGL245W | GSN1    | 4 | psiblast       | 1euqA_  | 97  |
| YGL245W | GSN1    | 5 | psiblast       | 1euqA_  | 181 |
| YGL246C | RAI1    | 1 | msa            | na      | 303 |
| YGL246C | RAI1    | 2 | unassigned     | na      | 84  |
| YGL247W | BRR6    | 1 | unassigned     | na      | 197 |
| YGL248W | PDE1    | 1 | pfam           | PF02112 | 369 |
| YGL249W | ZIP2    | 1 | unassigned     | na      | 704 |
| YGL250W | YGL250W | 1 | unassigned     | na      | 245 |
| YGL251C | HFM1    | 1 | psiblast       | 1hv8A_  | 190 |
| YGL251C | HFM1    | 2 | psiblast       | 1hv8A_  | 191 |
| YGL251C | HFM1    | 3 | psiblast       | 1d9xA_  | 88  |
| YGL251C | HFM1    | 4 | pfam           | PF02889 | 360 |
| YGL251C | HFM1    | 5 | unassigned     | na      | 217 |
| YGL252C | RTG2    | 1 | fold_recogniti | 1jceA   | 134 |
| YGL252C | RTG2    | 2 | fold_recogniti | 1jceA   | 217 |

|           |           |   |                |         |     |
|-----------|-----------|---|----------------|---------|-----|
| YGL252C   | RTG2      | 3 | msa            | na      | 173 |
| YGL252C   | RTG2      | 4 | unassigned     | na      | 64  |
| YGL253W   | HXK2      | 1 | psiblast       | 1ig8A_  | 107 |
| YGL253W   | HXK2      | 2 | psiblast       | 1ig8A_  | 379 |
| YGL254W   | FZF1      | 1 | psiblast       | 1lu6A_  | 65  |
| YGL254W   | FZF1      | 2 | psiblast       | 1lu6A_  | 72  |
| YGL254W   | FZF1      | 3 | msa            | na      | 162 |
| YGL255W   | ZRT1      | 1 | msa            | na      | 193 |
| YGL255W   | ZRT1      | 2 | pfam           | PF02535 | 183 |
| YGL256W   | ADH4      | 1 | unassigned     | na      | 74  |
| YGL256W   | ADH4      | 2 | psiblast       | 1j5rA_  | 191 |
| YGL256W   | ADH4      | 3 | psiblast       | 1j5rA_  | 78  |
| YGL256W   | ADH4      | 4 | psiblast       | 1j5rA_  | 122 |
| YGL257C   | MNT2      | 1 | unassigned     | na      | 129 |
| YGL257C   | MNT2      | 2 | fold_recogniti | 1IIOA   | 176 |
| YGL257C   | MNT2      | 3 | unassigned     | na      | 253 |
| YGL258W   | VEL1      | 1 | unassigned     | na      | 206 |
| YGL258W-A | YGL258W-A | 1 | psiblast       | 1eagA_  | 77  |
| YGL259W   | YPS5      | 1 | psiblast       | 1ypsA_  | 165 |
| YGL260W   | YGL260W   | 1 | unassigned     | na      | 76  |
| YGL262W   | YGL262W   | 1 | unassigned     | na      | 175 |
| YGL263W   | COS12     | 1 | msa            | na      | 59  |
| YGL263W   | COS12     | 2 | pfam           | PF00674 | 112 |
| YGL263W   | COS12     | 3 | unassigned     | na      | 75  |
| YGL263W   | COS12     | 4 | pfam           | PF00674 | 134 |
| YGR001C   | YGR001C   | 1 | unassigned     | na      | 193 |
| YGR002C   | SWC4      | 1 | unassigned     | na      | 160 |
| YGR002C   | SWC4      | 2 | pfam           | PF00249 | 61  |
| YGR002C   | SWC4      | 3 | unassigned     | na      | 255 |
| YGR003W   | CUL3      | 1 | psiblast       | 1ldjA_  | 102 |
| YGR003W   | CUL3      | 2 | psiblast       | 1ldjA_  | 183 |
| YGR003W   | CUL3      | 3 | psiblast       | 1ldjA_  | 192 |
| YGR003W   | CUL3      | 4 | psiblast       | 1ldjA_  | 74  |
| YGR003W   | CUL3      | 5 | psiblast       | 1ldjA_  | 119 |
| YGR003W   | CUL3      | 6 | psiblast       | 1ldjA_  | 74  |
| YGR004W   | PEX31     | 1 | unassigned     | na      | 462 |
| YGR005C   | TFG2      | 1 | psiblast       | 1f3uA_  | 194 |
| YGR005C   | TFG2      | 2 | unassigned     | na      | 75  |
| YGR005C   | TFG2      | 3 | psiblast       | 1bby__  | 131 |
| YGR006W   | PRP18     | 1 | unassigned     | na      | 78  |
| YGR006W   | PRP18     | 2 | psiblast       | 1dvkA_  | 141 |
| YGR007W   | MUQ1      | 1 | psiblast       | 1cozA_  | 173 |
| YGR007W   | MUQ1      | 2 | psiblast       | 1b6tA_  | 150 |
| YGR008C   | STF2      | 1 | unassigned     | na      | 84  |
| YGR009C   | SEC9      | 1 | unassigned     | na      | 204 |
| YGR009C   | SEC9      | 2 | psiblast       | 1bg1A_  | 98  |
| YGR009C   | SEC9      | 3 | psiblast       | 1i84S_  | 349 |
| YGR010W   | NMA2      | 1 | unassigned     | na      | 112 |



|         |         |   |                |         |     |
|---------|---------|---|----------------|---------|-----|
| YGR010W | NMA2    | 2 | psiblast       | 1kkuA_  | 283 |
| YGR011W | YGR011W | 1 | unassigned     | na      | 108 |
| YGR012W | YGR012W | 1 | psiblast       | 1jbqA_  | 294 |
| YGR012W | YGR012W | 2 | psiblast       | 1jbqA_  | 99  |
| YGR013W | SNU71   | 1 | psiblast       | 1i84S_  | 383 |
| YGR013W | SNU71   | 2 | msa            | na      | 237 |
| YGR014W | MSB2    | 1 | msa            | na      | 568 |
| YGR014W | MSB2    | 2 | msa            | na      | 298 |
| YGR014W | MSB2    | 3 | unassigned     | na      | 157 |
| YGR014W | MSB2    | 4 | msa            | na      | 200 |
| YGR014W | MSB2    | 5 | unassigned     | na      | 83  |
| YGR015C | YGR015C | 1 | psiblast       | 1cqzA_  | 328 |
| YGR016W | YGR016W | 1 | unassigned     | na      | 190 |
| YGR017W | YGR017W | 1 | fold_recogniti | 1ci0A   | 152 |
| YGR017W | YGR017W | 2 | unassigned     | na      | 145 |
| YGR018C | YGR018C | 1 | unassigned     | na      | 109 |
| YGR019W | UGA1    | 1 | psiblast       | 1gtxA_  | 471 |
| YGR020C | VMA7    | 1 | pfam           | PF01990 | 118 |
| YGR021W | YGR021W | 1 | psiblast       | 1lfpA_  | 218 |
| YGR021W | YGR021W | 2 | psiblast       | 1lfpA_  | 72  |
| YGR022C | YGR022C | 1 | unassigned     | na      | 109 |
| YGR023W | MTL1    | 1 | unassigned     | na      | 70  |
| YGR023W | MTL1    | 2 | fold_recogniti | 1deqA   | 64  |
| YGR023W | MTL1    | 3 | fold_recogniti | 1m2vB   | 254 |
| YGR023W | MTL1    | 4 | msa            | na      | 163 |
| YGR024C | THG1    | 1 | unassigned     | na      | 85  |
| YGR024C | THG1    | 2 | msa            | na      | 152 |
| YGR025W | YGR025W | 1 | unassigned     | na      | 100 |
| YGR026W | YGR026W | 1 | unassigned     | na      | 278 |
| YGR027C | RPS25A  | 1 | pfam           | PF03297 | 108 |
| YGR028W | MSP1    | 1 | psiblast       | 1e32A_  | 87  |
| YGR028W | MSP1    | 2 | psiblast       | 1e32A_  | 170 |
| YGR028W | MSP1    | 3 | psiblast       | 1e32A_  | 105 |
| YGR029W | ERV1    | 1 | msa            | na      | 72  |
| YGR029W | ERV1    | 2 | psiblast       | 1jr8A_  | 117 |
| YGR030C | POP6    | 1 | unassigned     | na      | 158 |
| YGR031W | YGR031W | 1 | psiblast       | 1cqzA_  | 342 |
| YGR032W | GSC2    | 1 | msa            | na      | 233 |
| YGR032W | GSC2    | 2 | msa            | na      | 307 |
| YGR032W | GSC2    | 3 | unassigned     | na      | 281 |
| YGR032W | GSC2    | 4 | pfam           | PF02364 | 864 |
| YGR032W | GSC2    | 5 | msa            | na      | 210 |
| YGR033C | FMP17   | 1 | msa            | na      | 239 |
| YGR034W | RPL26B  | 1 | psiblast       | 1k5yU_  | 129 |
| YGR035C | YGR035C | 1 | unassigned     | na      | 116 |
| YGR036C | CAX4    | 1 | psiblast       | 1d2tA_  | 239 |
| YGR037C | ACB1    | 1 | psiblast       | 2abd__  | 87  |
| YGR038W | ORM1    | 1 | msa            | na      | 222 |

|         |         |   |                |         |     |
|---------|---------|---|----------------|---------|-----|
| YGR039W | YGR039W | 1 | unassigned     | na      | 103 |
| YGR040W | KSS1    | 1 | psiblast       | 1erk__  | 108 |
| YGR040W | KSS1    | 2 | psiblast       | 1erk__  | 260 |
| YGR041W | BUD9    | 1 | unassigned     | na      | 547 |
| YGR042W | YGR042W | 1 | unassigned     | na      | 271 |
| YGR043C | YGR043C | 1 | psiblast       | 1f05A_  | 333 |
| YGR044C | RME1    | 1 | psiblast       | 1tf6A_  | 172 |
| YGR044C | RME1    | 2 | psiblast       | 1meyG_  | 79  |
| YGR044C | RME1    | 3 | psiblast       | 1sp2__  | 49  |
| YGR045C | YGR045C | 1 | unassigned     | na      | 120 |
| YGR046W | YGR046W | 1 | unassigned     | na      | 103 |
| YGR046W | YGR046W | 2 | msa            | na      | 282 |
| YGR047C | TFC4    | 1 | psiblast       | 1fchA_  | 67  |
| YGR047C | TFC4    | 2 | psiblast       | 1b89A_  | 336 |
| YGR047C | TFC4    | 3 | psiblast       | 1qqeA_  | 138 |
| YGR047C | TFC4    | 4 | msa            | na      | 103 |
| YGR047C | TFC4    | 5 | unassigned     | na      | 85  |
| YGR047C | TFC4    | 6 | fold_recogniti | 1fchA   | 95  |
| YGR047C | TFC4    | 7 | fold_recogniti | 1fchA   | 101 |
| YGR047C | TFC4    | 8 | fold_recogniti | 1fchA   | 100 |
| YGR048W | UFD1    | 1 | fold_recogniti | 1cz4A   | 118 |
| YGR048W | UFD1    | 2 | fold_recogniti | 1cz4A   | 92  |
| YGR048W | UFD1    | 3 | unassigned     | na      | 151 |
| YGR049W | SCM4    | 1 | unassigned     | na      | 187 |
| YGR050C | YGR050C | 1 | unassigned     | na      | 118 |
| YGR051C | YGR051C | 1 | unassigned     | na      | 107 |
| YGR052W | FMP48   | 1 | psiblast       | 1fotA_  | 68  |
| YGR052W | FMP48   | 2 | psiblast       | 1fotA_  | 240 |
| YGR052W | FMP48   | 3 | psiblast       | 1ggzA_  | 61  |
| YGR053C | YGR053C | 1 | unassigned     | na      | 283 |
| YGR054W | YGR054W | 1 | psiblast       | 1erjA_  | 362 |
| YGR054W | YGR054W | 2 | psiblast       | 1gxrA_  | 135 |
| YGR054W | YGR054W | 3 | msa            | na      | 145 |
| YGR055W | MUP1    | 1 | unassigned     | na      | 52  |
| YGR055W | MUP1    | 2 | pfam           | PF00324 | 522 |
| YGR056W | RSC1    | 1 | psiblast       | 1e6iA_  | 87  |
| YGR056W | RSC1    | 2 | psiblast       | 1eqfA_  | 143 |
| YGR056W | RSC1    | 3 | psiblast       | 1eqfA_  | 115 |
| YGR056W | RSC1    | 4 | fold_recogniti | 1m4zA   | 193 |
| YGR056W | RSC1    | 5 | msa            | na      | 159 |
| YGR056W | RSC1    | 6 | unassigned     | na      | 231 |
| YGR057C | LST7    | 1 | unassigned     | na      | 59  |
| YGR057C | LST7    | 2 | msa            | na      | 186 |
| YGR058W | YGR058W | 1 | psiblast       | 1juoA_  | 160 |
| YGR058W | YGR058W | 2 | psiblast       | 1juoA_  | 85  |
| YGR058W | YGR058W | 3 | psiblast       | 1hqvA_  | 90  |
| YGR059W | SPR3    | 1 | msa            | na      | 81  |
| YGR059W | SPR3    | 2 | fold_recogniti | 1h65A   | 103 |

|         |         |   |                |         |     |
|---------|---------|---|----------------|---------|-----|
| YGR059W | SPR3    | 3 | psiblast       | 1i84S_  | 328 |
| YGR060W | ERG25   | 1 | pfam           | PF01598 | 309 |
| YGR061C | ADE6    | 1 | unassigned     | na      | 251 |
| YGR061C | ADE6    | 2 | psiblast       | 1cliA_  | 212 |
| YGR061C | ADE6    | 3 | psiblast       | 1cliA_  | 150 |
| YGR061C | ADE6    | 4 | psiblast       | 1cliA_  | 42  |
| YGR061C | ADE6    | 5 | msa            | na      | 407 |
| YGR061C | ADE6    | 6 | psiblast       | 1jvnA_  | 296 |
| YGR062C | COX18   | 1 | msa            | na      | 119 |
| YGR062C | COX18   | 2 | pfam           | PF02096 | 197 |
| YGR063C | SPT4    | 1 | unassigned     | na      | 102 |
| YGR064W | YGR064W | 1 | unassigned     | na      | 122 |
| YGR065C | VHT1    | 1 | unassigned     | na      | 64  |
| YGR065C | VHT1    | 2 | psiblast       | 1ja5A_  | 529 |
| YGR066C | YGR066C | 1 | unassigned     | na      | 63  |
| YGR066C | YGR066C | 2 | msa            | na      | 229 |
| YGR067C | YGR067C | 1 | psiblast       | 1lu6A_  | 69  |
| YGR067C | YGR067C | 2 | psiblast       | 1lu6A_  | 50  |
| YGR067C | YGR067C | 3 | psiblast       | 1meyC_  | 46  |
| YGR067C | YGR067C | 4 | psiblast       | 1ubdC_  | 172 |
| YGR067C | YGR067C | 5 | unassigned     | na      | 457 |
| YGR068C | YGR068C | 1 | msa            | na      | 126 |
| YGR068C | YGR068C | 2 | unassigned     | na      | 75  |
| YGR068C | YGR068C | 3 | psiblast       | 1jsyA_  | 122 |
| YGR068C | YGR068C | 4 | psiblast       | 1jsyA_  | 132 |
| YGR068C | YGR068C | 5 | msa            | na      | 131 |
| YGR069W | YGR069W | 1 | unassigned     | na      | 111 |
| YGR070W | ROM1    | 1 | fold_recogniti | 1k83A   | 268 |
| YGR070W | ROM1    | 2 | pfam           | PF00610 | 132 |
| YGR070W | ROM1    | 3 | unassigned     | na      | 55  |
| YGR070W | ROM1    | 4 | psiblast       | 1ki1B_  | 199 |
| YGR070W | ROM1    | 5 | psiblast       | 1ki1B_  | 185 |
| YGR070W | ROM1    | 6 | pfam           | PF00780 | 316 |
| YGR071C | YGR071C | 1 | unassigned     | na      | 72  |
| YGR071C | YGR071C | 2 | pfam           | PF02892 | 80  |
| YGR071C | YGR071C | 3 | fold_recogniti | 1h6kA   | 303 |
| YGR071C | YGR071C | 4 | fold_recogniti | 1h6kA   | 201 |
| YGR071C | YGR071C | 5 | fold_recogniti | 1e8yA   | 80  |
| YGR071C | YGR071C | 6 | unassigned     | na      | 124 |
| YGR072W | UPF3    | 1 | unassigned     | na      | 60  |
| YGR072W | UPF3    | 2 | pfam           | PF03467 | 220 |
| YGR072W | UPF3    | 3 | unassigned     | na      | 107 |
| YGR073C | YGR073C | 1 | unassigned     | na      | 123 |
| YGR074W | SMD1    | 1 | psiblast       | 1b34A_  | 146 |
| YGR075C | PRP38   | 1 | pfam           | PF03371 | 242 |
| YGR076C | MRPL25  | 1 | unassigned     | na      | 157 |
| YGR077C | PEX8    | 1 | unassigned     | na      | 298 |
| YGR077C | PEX8    | 2 | msa            | na      | 291 |

|         |         |   |                |         |      |
|---------|---------|---|----------------|---------|------|
| YGR078C | PAC10   | 1 | fold_recogniti | 1fxkC   | 119  |
| YGR078C | PAC10   | 2 | fold_recogniti | 1fxkC   | 80   |
| YGR079W | YGR079W | 1 | unassigned     | na      | 370  |
| YGR080W | TWF1    | 1 | psiblast       | 1f7sA_  | 166  |
| YGR080W | TWF1    | 2 | fold_recogniti | 1cfyA   | 166  |
| YGR081C | SLX9    | 1 | unassigned     | na      | 210  |
| YGR082W | TOM20   | 1 | pfam           | PF02064 | 74   |
| YGR082W | TOM20   | 2 | psiblast       | 1om2A_  | 109  |
| YGR083C | GCD2    | 1 | psiblast       | 1i84S_  | 354  |
| YGR083C | GCD2    | 2 | fold_recogniti | 1m0sA   | 184  |
| YGR083C | GCD2    | 3 | msa            | na      | 113  |
| YGR084C | MRP13   | 1 | unassigned     | na      | 339  |
| YGR085C | RPL11B  | 1 | psiblast       | 1k5yJ_  | 174  |
| YGR086C | PIL1    | 1 | fold_recogniti | 1egyA   | 278  |
| YGR086C | PIL1    | 2 | unassigned     | na      | 61   |
| YGR087C | PDC6    | 1 | psiblast       | 1qpbA_  | 188  |
| YGR087C | PDC6    | 2 | psiblast       | 1qpbA_  | 165  |
| YGR087C | PDC6    | 3 | psiblast       | 1qpbA_  | 210  |
| YGR088W | CTT1    | 1 | psiblast       | 1a4eA_  | 64   |
| YGR088W | CTT1    | 2 | psiblast       | 1a4eA_  | 509  |
| YGR089W | NNF2    | 1 | unassigned     | na      | 208  |
| YGR089W | NNF2    | 2 | msa            | na      | 381  |
| YGR089W | NNF2    | 3 | unassigned     | na      | 68   |
| YGR089W | NNF2    | 4 | psiblast       | 2tmaA_  | 54   |
| YGR089W | NNF2    | 5 | psiblast       | 2tmaA_  | 78   |
| YGR089W | NNF2    | 6 | psiblast       | 2tmaA_  | 63   |
| YGR089W | NNF2    | 7 | psiblast       | 2tmaA_  | 84   |
| YGR090W | UTP22   | 1 | unassigned     | na      | 164  |
| YGR090W | UTP22   | 2 | pfam           | PF03813 | 1073 |
| YGR091W | PRP31   | 1 | fold_recogniti | 1bgxT   | 406  |
| YGR091W | PRP31   | 2 | unassigned     | na      | 88   |
| YGR092W | DBF2    | 1 | unassigned     | na      | 95   |
| YGR092W | DBF2    | 2 | psiblast       | 1ctpE_  | 347  |
| YGR092W | DBF2    | 3 | psiblast       | 1ctpE_  | 130  |
| YGR093W | YGR093W | 1 | msa            | na      | 217  |
| YGR093W | YGR093W | 2 | msa            | na      | 290  |
| YGR094W | VAS1    | 1 | msa            | na      | 121  |
| YGR094W | VAS1    | 2 | psiblast       | 1gaxA_  | 324  |
| YGR094W | VAS1    | 3 | psiblast       | 1gaxA_  | 512  |
| YGR094W | VAS1    | 4 | psiblast       | 1gaxA_  | 147  |
| YGR095C | RRP46   | 1 | psiblast       | 1e3pA_  | 106  |
| YGR095C | RRP46   | 2 | psiblast       | 1e3pA_  | 150  |
| YGR096W | TPC1    | 1 | fold_recogniti | 1is2A   | 314  |
| YGR097W | ASK10   | 1 | msa            | na      | 174  |
| YGR097W | ASK10   | 2 | unassigned     | na      | 285  |
| YGR097W | ASK10   | 3 | pfam           | PF00169 | 299  |
| YGR097W | ASK10   | 4 | unassigned     | na      | 388  |
| YGR098C | ESP1    | 1 | unassigned     | na      | 759  |

|         |         |                  |         |     |
|---------|---------|------------------|---------|-----|
| YGR098C | ESP1    | 2 pfam           | PF03568 | 871 |
| YGR099W | TEL2    | 1 unassigned     | na      | 158 |
| YGR099W | TEL2    | 2 fold_recogniti | 1h6kA   | 231 |
| YGR099W | TEL2    | 3 fold_recogniti | 1h6kA   | 163 |
| YGR099W | TEL2    | 4 unassigned     | na      | 136 |
| YGR100W | MDR1    | 1 pfam           | PF02893 | 164 |
| YGR100W | MDR1    | 2 psiblast       | 1fkmA_  | 236 |
| YGR100W | MDR1    | 3 psiblast       | 1fkmA_  | 53  |
| YGR100W | MDR1    | 4 unassigned     | na      | 69  |
| YGR100W | MDR1    | 5 psiblast       | 1iku__  | 115 |
| YGR100W | MDR1    | 6 psiblast       | 1iku__  | 129 |
| YGR100W | MDR1    | 7 unassigned     | na      | 184 |
| YGR101W | PCP1    | 1 unassigned     | na      | 104 |
| YGR101W | PCP1    | 2 pfam           | PF01694 | 242 |
| YGR102C | YGR102C | 1 unassigned     | na      | 183 |
| YGR103W | NOP7    | 1 msa            | na      | 241 |
| YGR103W | NOP7    | 2 unassigned     | na      | 63  |
| YGR103W | NOP7    | 3 pfam           | PF00533 | 153 |
| YGR103W | NOP7    | 4 psiblast       | 1dg3A_  | 148 |
| YGR104C | SRB5    | 1 unassigned     | na      | 307 |
| YGR105W | VMA21   | 1 unassigned     | na      | 77  |
| YGR106C | YGR106C | 1 unassigned     | na      | 265 |
| YGR107W | YGR107W | 1 unassigned     | na      | 149 |
| YGR108W | CLB1    | 1 msa            | na      | 203 |
| YGR108W | CLB1    | 2 psiblast       | 1gy3B_  | 146 |
| YGR108W | CLB1    | 3 psiblast       | 1gy3B_  | 122 |
| YGR109C | CLB6    | 1 unassigned     | na      | 91  |
| YGR109C | CLB6    | 2 psiblast       | 1vin__  | 164 |
| YGR109C | CLB6    | 3 psiblast       | 1vin__  | 125 |
| YGR110W | YGR110W | 1 psiblast       | 1cqzA_  | 445 |
| YGR111W | YGR111W | 1 unassigned     | na      | 400 |
| YGR112W | SHY1    | 1 pfam           | PF02104 | 389 |
| YGR113W | DAM1    | 1 unassigned     | na      | 343 |
| YGR114C | YGR114C | 1 unassigned     | na      | 129 |
| YGR115C | YGR115C | 1 msa            | na      | 197 |
| YGR115C | YGR115C | 2 unassigned     | na      | 62  |
| YGR116W | SPT6    | 1 psiblast       | 1i84S_  | 336 |
| YGR116W | SPT6    | 2 msa            | na      | 322 |
| YGR116W | SPT6    | 3 unassigned     | na      | 212 |
| YGR116W | SPT6    | 4 msa            | na      | 131 |
| YGR116W | SPT6    | 5 unassigned     | na      | 113 |
| YGR116W | SPT6    | 6 psiblast       | 1sro__  | 108 |
| YGR116W | SPT6    | 7 fold_recogniti | 1fu5A   | 152 |
| YGR116W | SPT6    | 8 msa            | na      | 77  |
| YGR117C | YGR117C | 1 unassigned     | na      | 476 |
| YGR118W | RPS23A  | 1 psiblast       | 1k5xL_  | 145 |
| YGR119C | NUP57   | 1 fold_recogniti | 1ldvA   | 287 |
| YGR119C | NUP57   | 2 psiblast       | 1avc__  | 140 |

|           |           |   |                |         |      |
|-----------|-----------|---|----------------|---------|------|
| YGR119C   | NUP57     | 3 | unassigned     | na      | 114  |
| YGR120C   | COG2      | 1 | fold_recogniti | 1bkdS   | 275  |
| YGR121C   | MEP1      | 1 | pfam           | PF00909 | 492  |
| YGR122C-A | YGR122C-A | 1 | unassigned     | na      | 42   |
| YGR122W   | YGR122W   | 1 | unassigned     | na      | 402  |
| YGR123C   | PPT1      | 1 | psiblast       | 1a17__  | 44   |
| YGR123C   | PPT1      | 2 | psiblast       | 1a17__  | 122  |
| YGR123C   | PPT1      | 3 | psiblast       | 1fjmA_  | 347  |
| YGR124W   | ASN2      | 1 | psiblast       | 1ct9A_  | 192  |
| YGR124W   | ASN2      | 2 | psiblast       | 1ct9A_  | 380  |
| YGR125W   | YGR125W   | 1 | unassigned     | na      | 76   |
| YGR125W   | YGR125W   | 2 | psiblast       | 1hynP_  | 109  |
| YGR125W   | YGR125W   | 3 | msa            | na      | 478  |
| YGR125W   | YGR125W   | 4 | fold_recogniti | 1h4xA   | 161  |
| YGR125W   | YGR125W   | 5 | unassigned     | na      | 212  |
| YGR126W   | YGR126W   | 1 | msa            | na      | 230  |
| YGR127W   | YGR127W   | 1 | msa            | na      | 312  |
| YGR128C   | UTP8      | 1 | unassigned     | na      | 713  |
| YGR129W   | SYF2      | 1 | unassigned     | na      | 215  |
| YGR130C   | YGR130C   | 1 | psiblast       | 1i84S_  | 191  |
| YGR130C   | YGR130C   | 2 | psiblast       | 1i84S_  | 295  |
| YGR130C   | YGR130C   | 3 | psiblast       | 1cii__  | 53   |
| YGR130C   | YGR130C   | 4 | psiblast       | 2tmaA_  | 52   |
| YGR130C   | YGR130C   | 5 | psiblast       | 2tmaA_  | 90   |
| YGR130C   | YGR130C   | 6 | psiblast       | 2tmaA_  | 62   |
| YGR130C   | YGR130C   | 7 | psiblast       | 2tmaA_  | 73   |
| YGR131W   | YGR131W   | 1 | unassigned     | na      | 174  |
| YGR132C   | PHB1      | 1 | psiblast       | 1lu7A_  | 212  |
| YGR132C   | PHB1      | 2 | psiblast       | 1lu7A_  | 75   |
| YGR133W   | PEX4      | 1 | psiblast       | 1fxtA_  | 183  |
| YGR134W   | CAF130    | 1 | unassigned     | na      | 1122 |
| YGR135W   | PRE9      | 1 | psiblast       | 1fntC_  | 258  |
| YGR136W   | LSB1      | 1 | psiblast       | 1griA_  | 110  |
| YGR136W   | LSB1      | 2 | fold_recogniti | 1m2vB   | 131  |
| YGR137W   | YGR137W   | 1 | unassigned     | na      | 124  |
| YGR138C   | TPO2      | 1 | msa            | na      | 147  |
| YGR138C   | TPO2      | 2 | psiblast       | 1ja5A_  | 426  |
| YGR138C   | TPO2      | 3 | psiblast       | 1ja5A_  | 41   |
| YGR139W   | YGR139W   | 1 | unassigned     | na      | 112  |
| YGR140W   | CBF2      | 1 | unassigned     | na      | 956  |
| YGR141W   | VPS62     | 1 | msa            | na      | 361  |
| YGR141W   | VPS62     | 2 | unassigned     | na      | 106  |
| YGR142W   | BTN2      | 1 | unassigned     | na      | 114  |
| YGR142W   | BTN2      | 2 | psiblast       | 1i84S_  | 296  |
| YGR143W   | SKN1      | 1 | fold_recogniti | 1I8mA   | 63   |
| YGR143W   | SKN1      | 2 | fold_recogniti | 1I8mA   | 79   |
| YGR143W   | SKN1      | 3 | fold_recogniti | 1I8mA   | 72   |
| YGR143W   | SKN1      | 4 | fold_recogniti | 1I8mA   | 51   |

|           |           |                  |        |     |
|-----------|-----------|------------------|--------|-----|
| YGR143W   | SKN1      | 5 unassigned     | na     | 209 |
| YGR143W   | SKN1      | 6 psiblast       | 1macA_ | 297 |
| YGR144W   | THI4      | 1 psiblast       | 1gt8A_ | 326 |
| YGR145W   | ENP2      | 1 psiblast       | 1gg2B_ | 367 |
| YGR145W   | ENP2      | 2 unassigned     | na     | 52  |
| YGR145W   | ENP2      | 3 psiblast       | 1i84S_ | 288 |
| YGR146C   | YGR146C   | 1 unassigned     | na     | 211 |
| YGR147C   | NAT2      | 1 unassigned     | na     | 90  |
| YGR147C   | NAT2      | 2 msa            | na     | 198 |
| YGR148C   | RPL24B    | 1 psiblast       | 1k5yS_ | 72  |
| YGR148C   | RPL24B    | 2 unassigned     | na     | 83  |
| YGR149W   | YGR149W   | 1 unassigned     | na     | 77  |
| YGR149W   | YGR149W   | 2 msa            | na     | 355 |
| YGR150C   | YGR150C   | 1 fold_recogniti | 1fchA  | 196 |
| YGR150C   | YGR150C   | 2 fold_recogniti | 1b3uA  | 191 |
| YGR150C   | YGR150C   | 3 fold_recogniti | 1b3uA  | 74  |
| YGR150C   | YGR150C   | 4 fold_recogniti | 1b3uA  | 164 |
| YGR150C   | YGR150C   | 5 fold_recogniti | 1b3uA  | 239 |
| YGR151C   | YGR151C   | 1 unassigned     | na     | 111 |
| YGR152C   | RSR1      | 1 psiblast       | 1guaA_ | 213 |
| YGR152C   | RSR1      | 2 unassigned     | na     | 59  |
| YGR153W   | YGR153W   | 1 unassigned     | na     | 217 |
| YGR154C   | YGR154C   | 1 psiblast       | 1eemA_ | 100 |
| YGR154C   | YGR154C   | 2 psiblast       | 1eemA_ | 103 |
| YGR154C   | YGR154C   | 3 psiblast       | 1k0mA_ | 153 |
| YGR155W   | CYS4      | 1 psiblast       | 1jbqA_ | 275 |
| YGR155W   | CYS4      | 2 psiblast       | 1jbqA_ | 93  |
| YGR155W   | CYS4      | 3 fold_recogniti | 1b3oA  | 139 |
| YGR156W   | PTI1      | 1 fold_recogniti | 3sxlA  | 103 |
| YGR156W   | PTI1      | 2 fold_recogniti | 3sxlA  | 157 |
| YGR156W   | PTI1      | 3 unassigned     | na     | 165 |
| YGR157W   | CHO2      | 1 unassigned     | na     | 869 |
| YGR158C   | MTR3      | 1 psiblast       | 1e3pA_ | 101 |
| YGR158C   | MTR3      | 2 psiblast       | 1e3pA_ | 149 |
| YGR159C   | NSR1      | 1 fold_recogniti | 1ldvA  | 158 |
| YGR159C   | NSR1      | 2 psiblast       | 1cvjA_ | 88  |
| YGR159C   | NSR1      | 3 psiblast       | 1cvjA_ | 168 |
| YGR160W   | YGR160W   | 1 msa            | na     | 203 |
| YGR161C   | RTS3      | 1 unassigned     | na     | 263 |
| YGR161W-A | YGR161W-A | 1 unassigned     | na     | 92  |
| YGR162W   | TIF4631   | 1 fold_recogniti | 1i8mA  | 82  |
| YGR162W   | TIF4631   | 2 fold_recogniti | 1jv2B  | 320 |
| YGR162W   | TIF4631   | 3 fold_recogniti | 1jv2B  | 103 |
| YGR162W   | TIF4631   | 4 unassigned     | na     | 86  |
| YGR162W   | TIF4631   | 5 psiblast       | 1hu3A_ | 140 |
| YGR162W   | TIF4631   | 6 psiblast       | 1hu3A_ | 159 |
| YGR162W   | TIF4631   | 7 unassigned     | na     | 62  |
| YGR163W   | GTR2      | 1 psiblast       | 1g17A_ | 220 |

|         |         |   |                |         |     |
|---------|---------|---|----------------|---------|-----|
| YGR163W | GTR2    | 2 | msa            | na      | 121 |
| YGR164W | YGR164W | 1 | unassigned     | na      | 111 |
| YGR165W | MRPS35  | 1 | unassigned     | na      | 345 |
| YGR166W | KRE11   | 1 | unassigned     | na      | 560 |
| YGR167W | CLC1    | 1 | pfam           | PF01086 | 233 |
| YGR168C | YGR168C | 1 | unassigned     | na      | 376 |
| YGR169C | PUS6    | 1 | psiblast       | 1kskA_  | 112 |
| YGR169C | PUS6    | 2 | psiblast       | 1kskA_  | 292 |
| YGR170W | PSD2    | 1 | fold_recogniti | 1ldvA   | 242 |
| YGR170W | PSD2    | 2 | unassigned     | na      | 126 |
| YGR170W | PSD2    | 3 | psiblast       | 1dqvA_  | 114 |
| YGR170W | PSD2    | 4 | psiblast       | 1dqvA_  | 161 |
| YGR170W | PSD2    | 5 | psiblast       | 1bynA_  | 174 |
| YGR170W | PSD2    | 6 | msa            | na      | 321 |
| YGR171C | MSM1    | 1 | psiblast       | 1a8h__  | 332 |
| YGR171C | MSM1    | 2 | psiblast       | 1a8h__  | 85  |
| YGR171C | MSM1    | 3 | psiblast       | 1a8h__  | 158 |
| YGR172C | YIP1    | 1 | msa            | na      | 107 |
| YGR172C | YIP1    | 2 | msa            | na      | 141 |
| YGR173W | RBG2    | 1 | psiblast       | 1egaA_  | 298 |
| YGR173W | RBG2    | 2 | unassigned     | na      | 70  |
| YGR174C | CBP4    | 1 | unassigned     | na      | 170 |
| YGR175C | ERG1    | 1 | psiblast       | 1fohA_  | 157 |
| YGR175C | ERG1    | 2 | psiblast       | 1fohA_  | 227 |
| YGR175C | ERG1    | 3 | psiblast       | 1fohA_  | 54  |
| YGR175C | ERG1    | 4 | unassigned     | na      | 58  |
| YGR176W | YGR176W | 1 | unassigned     | na      | 115 |
| YGR177C | ATF2    | 1 | unassigned     | na      | 120 |
| YGR177C | ATF2    | 2 | msa            | na      | 415 |
| YGR178C | PBP1    | 1 | msa            | na      | 195 |
| YGR178C | PBP1    | 2 | fold_recogniti | 1deqA   | 113 |
| YGR178C | PBP1    | 3 | fold_recogniti | 1ldvA   | 287 |
| YGR178C | PBP1    | 4 | fold_recogniti | 1la5A   | 127 |
| YGR179C | OKP1    | 1 | unassigned     | na      | 406 |
| YGR180C | RNR4    | 1 | psiblast       | 1jkOB_  | 198 |
| YGR180C | RNR4    | 2 | psiblast       | 1jkOB_  | 74  |
| YGR180C | RNR4    | 3 | psiblast       | 1jkOB_  | 73  |
| YGR181W | TIM13   | 1 | pfam           | PF02953 | 105 |
| YGR182C | YGR182C | 1 | unassigned     | na      | 117 |
| YGR183C | QCR9    | 1 | psiblast       | 1kyoI_  | 66  |
| YGR184C | UBR1    | 1 | unassigned     | na      | 75  |
| YGR184C | UBR1    | 2 | pfam           | PF02207 | 130 |
| YGR184C | UBR1    | 3 | unassigned     | na      | 479 |
| YGR184C | UBR1    | 4 | msa            | na      | 573 |
| YGR184C | UBR1    | 5 | unassigned     | na      | 299 |
| YGR184C | UBR1    | 6 | msa            | na      | 270 |
| YGR184C | UBR1    | 7 | unassigned     | na      | 124 |
| YGR185C | TYS1    | 1 | psiblast       | 1lkwA_  | 277 |



|         |         |   |                |         |     |
|---------|---------|---|----------------|---------|-----|
| YGR185C | TYS1    | 2 | psiblast       | 1lkwA_  | 117 |
| YGR186W | TFG1    | 1 | unassigned     | na      | 127 |
| YGR186W | TFG1    | 2 | msa            | na      | 219 |
| YGR186W | TFG1    | 3 | unassigned     | na      | 389 |
| YGR187C | HGH1    | 1 | fold_recogniti | 1jpwA   | 136 |
| YGR187C | HGH1    | 2 | fold_recogniti | 1jpwA   | 147 |
| YGR187C | HGH1    | 3 | fold_recogniti | 1jpwA   | 111 |
| YGR188C | BUB1    | 1 | unassigned     | na      | 136 |
| YGR188C | BUB1    | 2 | psiblast       | 1cxzB_  | 75  |
| YGR188C | BUB1    | 3 | unassigned     | na      | 241 |
| YGR188C | BUB1    | 4 | psiblast       | 1jnuA_  | 137 |
| YGR188C | BUB1    | 5 | psiblast       | 1a25A_  | 74  |
| YGR188C | BUB1    | 6 | psiblast       | 1ctpE_  | 289 |
| YGR188C | BUB1    | 7 | psiblast       | 1ctpE_  | 69  |
| YGR189C | CRH1    | 1 | psiblast       | 2ayh__  | 257 |
| YGR189C | CRH1    | 2 | psiblast       | 1cpm__  | 53  |
| YGR189C | CRH1    | 3 | fold_recogniti | 1k83A   | 197 |
| YGR190C | YGR190C | 1 | unassigned     | na      | 121 |
| YGR191W | HIP1    | 1 | unassigned     | na      | 74  |
| YGR191W | HIP1    | 2 | pfam           | PF00324 | 529 |
| YGR192C | TDH3    | 1 | psiblast       | 3gpdR_  | 161 |
| YGR192C | TDH3    | 2 | psiblast       | 3gpdR_  | 171 |
| YGR193C | PDX1    | 1 | psiblast       | 1fyc__  | 147 |
| YGR193C | PDX1    | 2 | psiblast       | 1bal__  | 71  |
| YGR193C | PDX1    | 3 | psiblast       | 1c4tA_  | 192 |
| YGR194C | XKS1    | 1 | psiblast       | 1bo5O_  | 297 |
| YGR194C | XKS1    | 2 | psiblast       | 1bo5O_  | 84  |
| YGR194C | XKS1    | 3 | psiblast       | 1bo5O_  | 219 |
| YGR195W | SKI6    | 1 | psiblast       | 1e3pA_  | 87  |
| YGR195W | SKI6    | 2 | psiblast       | 1e3pA_  | 159 |
| YGR196C | FYV8    | 1 | fold_recogniti | 1ldvA   | 216 |
| YGR196C | FYV8    | 2 | fold_recogniti | 1l8mA   | 69  |
| YGR196C | FYV8    | 3 | fold_recogniti | 1l8mA   | 79  |
| YGR196C | FYV8    | 4 | fold_recogniti | 1l8mA   | 70  |
| YGR196C | FYV8    | 5 | fold_recogniti | 1l8mA   | 94  |
| YGR196C | FYV8    | 6 | msa            | na      | 289 |
| YGR197C | SNG1    | 1 | unassigned     | na      | 547 |
| YGR198W | YGR198W | 1 | psiblast       | 1elwA_  | 179 |
| YGR198W | YGR198W | 2 | unassigned     | na      | 78  |
| YGR198W | YGR198W | 3 | psiblast       | 1fchA_  | 146 |
| YGR198W | YGR198W | 4 | psiblast       | 1fchA_  | 68  |
| YGR198W | YGR198W | 5 | psiblast       | 1fchA_  | 137 |
| YGR198W | YGR198W | 6 | msa            | na      | 209 |
| YGR199W | PMT6    | 1 | pfam           | PF02366 | 337 |
| YGR199W | PMT6    | 2 | pfam           | PF02815 | 63  |
| YGR199W | PMT6    | 3 | fold_recogniti | 1n4kA   | 138 |
| YGR199W | PMT6    | 4 | msa            | na      | 221 |
| YGR200C | ELP2    | 1 | psiblast       | 1k32A_  | 542 |

|         |         |    |                |         |     |
|---------|---------|----|----------------|---------|-----|
| YGR200C | ELP2    | 2  | psiblast       | 1gg2B_  | 92  |
| YGR200C | ELP2    | 3  | psiblast       | 1erjA_  | 77  |
| YGR200C | ELP2    | 4  | msa            | na      | 77  |
| YGR201C | YGR201C | 1  | psiblast       | 1gwcA_  | 135 |
| YGR201C | YGR201C | 2  | psiblast       | 1gwcA_  | 139 |
| YGR202C | PCT1    | 1  | unassigned     | na      | 100 |
| YGR202C | PCT1    | 2  | psiblast       | 1cozA_  | 151 |
| YGR202C | PCT1    | 3  | unassigned     | na      | 173 |
| YGR203W | YGR203W | 1  | psiblast       | 1cwtA_  | 148 |
| YGR204W | ADE3    | 1  | psiblast       | 1diaA_  | 175 |
| YGR204W | ADE3    | 2  | psiblast       | 1diaA_  | 138 |
| YGR204W | ADE3    | 3  | psiblast       | 1fp7A_  | 374 |
| YGR204W | ADE3    | 4  | psiblast       | 1fp7A_  | 259 |
| YGR205W | YGR205W | 1  | psiblast       | 1esmA_  | 290 |
| YGR206W | YGR206W | 1  | unassigned     | na      | 101 |
| YGR207C | YGR207C | 1  | psiblast       | 1efpB_  | 261 |
| YGR208W | SER2    | 1  | msa            | na      | 75  |
| YGR208W | SER2    | 2  | psiblast       | 1f5sA_  | 167 |
| YGR208W | SER2    | 3  | psiblast       | 1f5sA_  | 67  |
| YGR209C | TRX2    | 1  | psiblast       | 1erv__  | 104 |
| YGR210C | YGR210C | 1  | psiblast       | 1egaA_  | 206 |
| YGR210C | YGR210C | 2  | psiblast       | 1egaA_  | 141 |
| YGR210C | YGR210C | 3  | msa            | na      | 64  |
| YGR211W | ZPR1    | 1  | pfam           | PF03367 | 256 |
| YGR211W | ZPR1    | 2  | pfam           | PF03367 | 230 |
| YGR212W | YGR212W | 1  | msa            | na      | 239 |
| YGR212W | YGR212W | 2  | unassigned     | na      | 229 |
| YGR213C | RTA1    | 1  | unassigned     | na      | 138 |
| YGR213C | RTA1    | 2  | msa            | na      | 179 |
| YGR214W | RPS0A   | 1  | psiblast       | 1k5xB_  | 252 |
| YGR215W | RSM27   | 1  | unassigned     | na      | 110 |
| YGR216C | GPI1    | 1  | unassigned     | na      | 258 |
| YGR216C | GPI1    | 2  | msa            | na      | 351 |
| YGR217W | CCH1    | 1  | unassigned     | na      | 232 |
| YGR217W | CCH1    | 2  | psiblast       | 1exbE_  | 133 |
| YGR217W | CCH1    | 3  | unassigned     | na      | 61  |
| YGR217W | CCH1    | 4  | msa            | na      | 185 |
| YGR217W | CCH1    | 5  | msa            | na      | 499 |
| YGR217W | CCH1    | 6  | unassigned     | na      | 87  |
| YGR217W | CCH1    | 7  | msa            | na      | 133 |
| YGR217W | CCH1    | 8  | msa            | na      | 107 |
| YGR217W | CCH1    | 9  | psiblast       | 1byyA_  | 91  |
| YGR217W | CCH1    | 10 | msa            | na      | 233 |
| YGR217W | CCH1    | 11 | msa            | na      | 130 |
| YGR217W | CCH1    | 12 | unassigned     | na      | 148 |
| YGR218W | CRM1    | 1  | msa            | na      | 746 |
| YGR218W | CRM1    | 2  | unassigned     | na      | 102 |
| YGR218W | CRM1    | 3  | fold_recogniti | 1c7dA   | 98  |

|         |         |   |                |         |     |
|---------|---------|---|----------------|---------|-----|
| YGR218W | CRM1    | 4 | fold_recogniti | 1c7dA   | 138 |
| YGR219W | YGR219W | 1 | unassigned     | na      | 113 |
| YGR220C | MRPL9   | 1 | psiblast       | 1lnrB_  | 153 |
| YGR220C | MRPL9   | 2 | psiblast       | 1lnrB_  | 116 |
| YGR221C | TOS2    | 1 | unassigned     | na      | 179 |
| YGR221C | TOS2    | 2 | msa            | na      | 443 |
| YGR222W | PET54   | 1 | unassigned     | na      | 293 |
| YGR223C | YGR223C | 1 | psiblast       | 1gg2B_  | 379 |
| YGR223C | YGR223C | 2 | unassigned     | na      | 69  |
| YGR224W | AZR1    | 1 | psiblast       | 1lviA_  | 465 |
| YGR224W | AZR1    | 2 | unassigned     | na      | 148 |
| YGR225W | AMA1    | 1 | unassigned     | na      | 98  |
| YGR225W | AMA1    | 2 | psiblast       | 1erjA_  | 366 |
| YGR225W | AMA1    | 3 | psiblast       | 1gg2B_  | 98  |
| YGR226C | YGR226C | 1 | unassigned     | na      | 199 |
| YGR227W | DIE2    | 1 | msa            | na      | 412 |
| YGR227W | DIE2    | 2 | unassigned     | na      | 113 |
| YGR228W | YGR228W | 1 | unassigned     | na      | 114 |
| YGR229C | SMI1    | 1 | unassigned     | na      | 73  |
| YGR229C | SMI1    | 2 | msa            | na      | 230 |
| YGR229C | SMI1    | 3 | msa            | na      | 202 |
| YGR230W | BNS1    | 1 | unassigned     | na      | 137 |
| YGR231C | PHB2    | 1 | psiblast       | 1lu7A_  | 240 |
| YGR231C | PHB2    | 2 | psiblast       | 1lu7A_  | 75  |
| YGR232W | NAS6    | 1 | psiblast       | 1iknD_  | 60  |
| YGR232W | NAS6    | 2 | psiblast       | 1iknD_  | 74  |
| YGR232W | NAS6    | 3 | psiblast       | 1iknD_  | 94  |
| YGR233C | PHO81   | 1 | pfam           | PF03105 | 175 |
| YGR233C | PHO81   | 2 | unassigned     | na      | 68  |
| YGR233C | PHO81   | 3 | fold_recogniti | 1qoyA   | 176 |
| YGR233C | PHO81   | 4 | psiblast       | 1k1aA_  | 132 |
| YGR233C | PHO81   | 5 | psiblast       | 1k1aA_  | 144 |
| YGR233C | PHO81   | 6 | msa            | na      | 253 |
| YGR233C | PHO81   | 7 | msa            | na      | 230 |
| YGR234W | YHB1    | 1 | psiblast       | 1cqxA_  | 110 |
| YGR234W | YHB1    | 2 | psiblast       | 1cqxA_  | 150 |
| YGR234W | YHB1    | 3 | psiblast       | 1cqxA_  | 139 |
| YGR235C | YGR235C | 1 | unassigned     | na      | 233 |
| YGR236C | SPG1    | 1 | unassigned     | na      | 129 |
| YGR237C | YGR237C | 1 | unassigned     | na      | 331 |
| YGR237C | YGR237C | 2 | msa            | na      | 248 |
| YGR237C | YGR237C | 3 | unassigned     | na      | 206 |
| YGR238C | KEL2    | 1 | fold_recogniti | 1k3iA   | 214 |
| YGR238C | KEL2    | 2 | psiblast       | 1gof__  | 133 |
| YGR238C | KEL2    | 3 | psiblast       | 1i84S_  | 327 |
| YGR238C | KEL2    | 4 | psiblast       | 1c1gA_  | 208 |
| YGR239C | PEX21   | 1 | msa            | na      | 140 |
| YGR239C | PEX21   | 2 | unassigned     | na      | 148 |

|         |         |   |                |         |     |
|---------|---------|---|----------------|---------|-----|
| YGR240C | PFK1    | 1 | unassigned     | na      | 187 |
| YGR240C | PFK1    | 2 | psiblast       | 3pfk__  | 242 |
| YGR240C | PFK1    | 3 | psiblast       | 3pfk__  | 122 |
| YGR240C | PFK1    | 4 | psiblast       | 1kzhA_  | 281 |
| YGR240C | PFK1    | 5 | fold_recogniti | 1pfkA   | 84  |
| YGR240C | PFK1    | 6 | unassigned     | na      | 71  |
| YGR241C | YAP1802 | 1 | psiblast       | 1hf8A_  | 149 |
| YGR241C | YAP1802 | 2 | psiblast       | 1hf8A_  | 135 |
| YGR241C | YAP1802 | 3 | msa            | na      | 284 |
| YGR242W | YGR242W | 1 | unassigned     | na      | 102 |
| YGR243W | FMP43   | 1 | pfam           | PF03650 | 146 |
| YGR244C | LSC2    | 1 | psiblast       | 1eucB_  | 190 |
| YGR244C | LSC2    | 2 | psiblast       | 1eucB_  | 237 |
| YGR245C | SDA1    | 1 | unassigned     | na      | 77  |
| YGR245C | SDA1    | 2 | fold_recogniti | 1gw5B   | 119 |
| YGR245C | SDA1    | 3 | fold_recogniti | 1gw5B   | 129 |
| YGR245C | SDA1    | 4 | fold_recogniti | 1gw5B   | 176 |
| YGR245C | SDA1    | 5 | msa            | na      | 181 |
| YGR245C | SDA1    | 6 | unassigned     | na      | 85  |
| YGR246C | BRF1    | 1 | psiblast       | 1dl6A_  | 61  |
| YGR246C | BRF1    | 2 | psiblast       | 1d3uB_  | 114 |
| YGR246C | BRF1    | 3 | psiblast       | 1d3uB_  | 106 |
| YGR246C | BRF1    | 4 | msa            | na      | 315 |
| YGR247W | CPD1    | 1 | unassigned     | na      | 239 |
| YGR248W | SOL4    | 1 | psiblast       | 1d9tA_  | 255 |
| YGR249W | MGA1    | 1 | psiblast       | 1hks__  | 117 |
| YGR249W | MGA1    | 2 | fold_recogniti | 1i3qA   | 339 |
| YGR250C | YGR250C | 1 | unassigned     | na      | 94  |
| YGR250C | YGR250C | 2 | psiblast       | 1fxIA_  | 92  |
| YGR250C | YGR250C | 3 | psiblast       | 1cvjA_  | 95  |
| YGR250C | YGR250C | 4 | psiblast       | 1cvjA_  | 149 |
| YGR250C | YGR250C | 5 | psiblast       | 2u2fA_  | 100 |
| YGR250C | YGR250C | 6 | psiblast       | 1bnyA_  | 167 |
| YGR250C | YGR250C | 7 | psiblast       | 1g9IA_  | 84  |
| YGR251W | YGR251W | 1 | unassigned     | na      | 196 |
| YGR252W | GCN5    | 1 | unassigned     | na      | 70  |
| YGR252W | GCN5    | 2 | psiblast       | 1yghA_  | 108 |
| YGR252W | GCN5    | 3 | psiblast       | 1yghA_  | 56  |
| YGR252W | GCN5    | 4 | unassigned     | na      | 85  |
| YGR252W | GCN5    | 5 | psiblast       | 1e6iA_  | 120 |
| YGR253C | PUP2    | 1 | psiblast       | 1fntE_  | 260 |
| YGR254W | ENO1    | 1 | psiblast       | 1ebgA_  | 116 |
| YGR254W | ENO1    | 2 | psiblast       | 1ebgA_  | 321 |
| YGR255C | COQ6    | 1 | psiblast       | 1k0iA_  | 301 |
| YGR255C | COQ6    | 2 | psiblast       | 1k0iA_  | 178 |
| YGR256W | GND2    | 1 | psiblast       | 1pgn__  | 182 |
| YGR256W | GND2    | 2 | psiblast       | 1pgn__  | 310 |
| YGR257C | MTM1    | 1 | pfam           | PF00153 | 156 |

|           |           |    |                |         |     |
|-----------|-----------|----|----------------|---------|-----|
| YGR257C   | MTM1      | 2  | pfam           | PF00153 | 106 |
| YGR257C   | MTM1      | 3  | pfam           | PF00153 | 104 |
| YGR258C   | RAD2      | 1  | fold_recogniti | 1bgxT   | 195 |
| YGR258C   | RAD2      | 2  | msa            | na      | 452 |
| YGR258C   | RAD2      | 3  | psiblast       | 1a76__  | 384 |
| YGR259C   | YGR259C   | 1  | unassigned     | na      | 146 |
| YGR260W   | TNA1      | 1  | unassigned     | na      | 73  |
| YGR260W   | TNA1      | 2  | psiblast       | 1ja5A_  | 461 |
| YGR261C   | APL6      | 1  | psiblast       | 1gw5B_  | 122 |
| YGR261C   | APL6      | 2  | psiblast       | 1gw5B_  | 101 |
| YGR261C   | APL6      | 3  | psiblast       | 1gw5B_  | 167 |
| YGR261C   | APL6      | 4  | psiblast       | 1gw5B_  | 186 |
| YGR261C   | APL6      | 5  | msa            | na      | 146 |
| YGR261C   | APL6      | 6  | psiblast       | 1iu1A_  | 87  |
| YGR262C   | BUD32     | 1  | psiblast       | 1a06__  | 115 |
| YGR262C   | BUD32     | 2  | psiblast       | 1a06__  | 146 |
| YGR263C   | YGR263C   | 1  | psiblast       | 1k4yA_  | 424 |
| YGR264C   | MES1      | 1  | unassigned     | na      | 190 |
| YGR264C   | MES1      | 2  | psiblast       | 1f4IA_  | 242 |
| YGR264C   | MES1      | 3  | psiblast       | 1f4IA_  | 174 |
| YGR264C   | MES1      | 4  | psiblast       | 1f4IA_  | 145 |
| YGR265W   | YGR265W   | 1  | unassigned     | na      | 136 |
| YGR266W   | YGR266W   | 1  | unassigned     | na      | 701 |
| YGR267C   | FOL2      | 1  | psiblast       | 1is7A_  | 243 |
| YGR268C   | HUA1      | 1  | unassigned     | na      | 145 |
| YGR268C   | HUA1      | 2  | fold_recogniti | 1exkA   | 53  |
| YGR269W   | YGR269W   | 1  | unassigned     | na      | 108 |
| YGR270W   | YTA7      | 1  | unassigned     | na      | 154 |
| YGR270W   | YTA7      | 2  | psiblast       | 1e32A_  | 148 |
| YGR270W   | YTA7      | 3  | psiblast       | 1e32A_  | 107 |
| YGR270W   | YTA7      | 4  | psiblast       | 1e32A_  | 176 |
| YGR270W   | YTA7      | 5  | psiblast       | 1e32A_  | 145 |
| YGR270W   | YTA7      | 6  | psiblast       | 1iqpA_  | 192 |
| YGR270W   | YTA7      | 7  | fold_recogniti | 1eqfA   | 216 |
| YGR270W   | YTA7      | 8  | msa            | na      | 147 |
| YGR270W   | YTA7      | 9  | unassigned     | na      | 94  |
| YGR271C-A | YGR271C-A | 1  | unassigned     | na      | 63  |
| YGR271W   | SLH1      | 1  | msa            | na      | 255 |
| YGR271W   | SLH1      | 2  | psiblast       | 1hv8A_  | 237 |
| YGR271W   | SLH1      | 3  | psiblast       | 1hv8A_  | 203 |
| YGR271W   | SLH1      | 4  | psiblast       | 1d2mA_  | 94  |
| YGR271W   | SLH1      | 5  | msa            | na      | 285 |
| YGR271W   | SLH1      | 6  | fold_recogniti | 1gm5A   | 196 |
| YGR271W   | SLH1      | 7  | psiblast       | 1d9xA_  | 318 |
| YGR271W   | SLH1      | 8  | unassigned     | na      | 188 |
| YGR271W   | SLH1      | 9  | psiblast       | 1jj2X_  | 80  |
| YGR271W   | SLH1      | 10 | msa            | na      | 111 |
| YGR272C   | YGR272C   | 1  | unassigned     | na      | 152 |

|         |         |   |                |         |     |
|---------|---------|---|----------------|---------|-----|
| YGR273C | YGR273C | 1 | unassigned     | na      | 174 |
| YGR274C | TAF1    | 1 | unassigned     | na      | 317 |
| YGR274C | TAF1    | 2 | msa            | na      | 570 |
| YGR274C | TAF1    | 3 | msa            | na      | 179 |
| YGR275W | RTT102  | 1 | unassigned     | na      | 186 |
| YGR276C | RNH70   | 1 | msa            | na      | 163 |
| YGR276C | RNH70   | 2 | psiblast       | 1dpi__  | 299 |
| YGR276C | RNH70   | 3 | unassigned     | na      | 91  |
| YGR277C | YGR277C | 1 | msa            | na      | 118 |
| YGR277C | YGR277C | 2 | psiblast       | 1cozA_  | 187 |
| YGR278W | CWC22   | 1 | psiblast       | 1hu3A_  | 226 |
| YGR278W | CWC22   | 2 | unassigned     | na      | 74  |
| YGR278W | CWC22   | 3 | fold_recogniti | 1h6kA   | 214 |
| YGR278W | CWC22   | 4 | unassigned     | na      | 63  |
| YGR279C | SCW4    | 1 | unassigned     | na      | 96  |
| YGR279C | SCW4    | 2 | psiblast       | 1ghsA_  | 122 |
| YGR279C | SCW4    | 3 | psiblast       | 1ghsA_  | 87  |
| YGR279C | SCW4    | 4 | psiblast       | 1ghsA_  | 81  |
| YGR280C | PXR1    | 1 | pfam           | PF01585 | 136 |
| YGR280C | PXR1    | 2 | unassigned     | na      | 135 |
| YGR281W | YOR1    | 1 | fold_recogniti | 1jj7A   | 99  |
| YGR281W | YOR1    | 2 | unassigned     | na      | 90  |
| YGR281W | YOR1    | 3 | fold_recogniti | 1i84S   | 112 |
| YGR281W | YOR1    | 4 | fold_recogniti | 1i84S   | 243 |
| YGR281W | YOR1    | 5 | psiblast       | 1nbd__  | 267 |
| YGR281W | YOR1    | 6 | unassigned     | na      | 52  |
| YGR281W | YOR1    | 7 | psiblast       | 1jsqA_  | 310 |
| YGR281W | YOR1    | 8 | psiblast       | 1jsqA_  | 304 |
| YGR282C | BGL2    | 1 | psiblast       | 1ghsA_  | 147 |
| YGR282C | BGL2    | 2 | psiblast       | 1ghsA_  | 46  |
| YGR282C | BGL2    | 3 | psiblast       | 1ghsA_  | 120 |
| YGR283C | YGR283C | 1 | psiblast       | 1k3rA_  | 234 |
| YGR283C | YGR283C | 2 | psiblast       | 1k3rA_  | 107 |
| YGR284C | ERV29   | 1 | pfam           | PF02077 | 310 |
| YGR285C | ZUO1    | 1 | unassigned     | na      | 82  |
| YGR285C | ZUO1    | 2 | psiblast       | 1xbl__  | 130 |
| YGR285C | ZUO1    | 3 | msa            | na      | 221 |
| YGR286C | BIO2    | 1 | unassigned     | na      | 116 |
| YGR286C | BIO2    | 2 | psiblast       | 1b5tA_  | 146 |
| YGR286C | BIO2    | 3 | msa            | na      | 113 |
| YGR287C | YGR287C | 1 | psiblast       | 1uok__  | 302 |
| YGR287C | YGR287C | 2 | psiblast       | 1uok__  | 287 |
| YGR288W | MAL13   | 1 | psiblast       | 1zmeC_  | 73  |
| YGR288W | MAL13   | 2 | msa            | na      | 279 |
| YGR288W | MAL13   | 3 | unassigned     | na      | 121 |
| YGR289C | MAL11   | 1 | unassigned     | na      | 94  |
| YGR289C | MAL11   | 2 | psiblast       | 1ja5A_  | 410 |
| YGR289C | MAL11   | 3 | psiblast       | 1ja5A_  | 112 |

|           |           |   |                |         |     |
|-----------|-----------|---|----------------|---------|-----|
| YGR290W   | YGR290W   | 1 | unassigned     | na      | 147 |
| YGR291C   | YGR291C   | 1 | unassigned     | na      | 73  |
| YGR292W   | MAL12     | 1 | psiblast       | 1uok__  | 299 |
| YGR292W   | MAL12     | 2 | psiblast       | 1uok__  | 285 |
| YGR293C   | YGR293C   | 1 | unassigned     | na      | 153 |
| YGR294W   | YGR294W   | 1 | pfam           | PF00660 | 120 |
| YGR295C   | COS6      | 1 | msa            | na      | 61  |
| YGR295C   | COS6      | 2 | pfam           | PF00674 | 108 |
| YGR295C   | COS6      | 3 | unassigned     | na      | 72  |
| YGR295C   | COS6      | 4 | pfam           | PF00674 | 140 |
| YGR296W   | YRF1-3    | 1 | msa            | na      | 273 |
| YGR296W   | YRF1-3    | 2 | msa            | na      | 298 |
| YGR296W   | YRF1-3    | 3 | unassigned     | na      | 180 |
| YGR296W   | YRF1-3    | 4 | psiblast       | 1fuuA_  | 517 |
| YGR296W   | YRF1-3    | 5 | msa            | na      | 334 |
| YGR296W   | YRF1-3    | 6 | unassigned     | na      | 257 |
| YHL001W   | RPL14B    | 1 | pfam           | PF00467 | 50  |
| YHL001W   | RPL14B    | 2 | pfam           | PF01929 | 88  |
| YHL002C-A | YHL002C-A | 1 | unassigned     | na      | 162 |
| YHL002W   | HSE1      | 1 | psiblast       | 1elkA_  | 78  |
| YHL002W   | HSE1      | 2 | psiblast       | 1elkA_  | 68  |
| YHL002W   | HSE1      | 3 | unassigned     | na      | 61  |
| YHL002W   | HSE1      | 4 | psiblast       | 1griA_  | 96  |
| YHL002W   | HSE1      | 5 | psiblast       | 1griA_  | 149 |
| YHL003C   | LAG1      | 1 | msa            | na      | 164 |
| YHL003C   | LAG1      | 2 | pfam           | PF03798 | 247 |
| YHL004W   | MRP4      | 1 | unassigned     | na      | 128 |
| YHL004W   | MRP4      | 2 | psiblast       | 1fjgB_  | 266 |
| YHL005C   | YHL005C   | 1 | unassigned     | na      | 130 |
| YHL006C   | SHU1      | 1 | unassigned     | na      | 159 |
| YHL006W-A | YHL006W-A | 1 | unassigned     | na      | 117 |
| YHL007C   | STE20     | 1 | unassigned     | na      | 69  |
| YHL007C   | STE20     | 2 | fold_recogniti | 1deqA   | 225 |
| YHL007C   | STE20     | 3 | psiblast       | 1f3mA_  | 117 |
| YHL007C   | STE20     | 4 | fold_recogniti | 1m2vB   | 187 |
| YHL007C   | STE20     | 5 | psiblast       | 1f3mC_  | 98  |
| YHL007C   | STE20     | 6 | psiblast       | 1f3mC_  | 243 |
| YHL008C   | YHL008C   | 1 | psiblast       | 1fqyA_  | 150 |
| YHL008C   | YHL008C   | 2 | psiblast       | 1fqyA_  | 167 |
| YHL008C   | YHL008C   | 3 | unassigned     | na      | 310 |
| YHL009C   | YAP3      | 1 | unassigned     | na      | 138 |
| YHL009C   | YAP3      | 2 | psiblast       | 1gd2E_  | 107 |
| YHL009C   | YAP3      | 3 | unassigned     | na      | 85  |
| YHL010C   | YHL010C   | 1 | unassigned     | na      | 209 |
| YHL010C   | YHL010C   | 2 | psiblast       | 1i84S_  | 376 |
| YHL011C   | PRS3      | 1 | psiblast       | 1dkrA_  | 174 |
| YHL011C   | PRS3      | 2 | psiblast       | 1dkrA_  | 146 |
| YHL012W   | YHL012W   | 1 | unassigned     | na      | 61  |

|         |         |   |                |         |     |
|---------|---------|---|----------------|---------|-----|
| YHL012W | YHL012W | 2 | fold_recogniti | 1hv9A   | 432 |
| YHL013C | YHL013C | 1 | msa            | na      | 171 |
| YHL013C | YHL013C | 2 | pfam           | PF02338 | 136 |
| YHL014C | YLF2    | 1 | psiblast       | 1egaA_  | 202 |
| YHL014C | YLF2    | 2 | psiblast       | 1egaA_  | 118 |
| YHL014C | YLF2    | 3 | msa            | na      | 85  |
| YHL015W | RPS20   | 1 | psiblast       | 1k5xJ_  | 121 |
| YHL016C | DUR3    | 1 | pfam           | PF00474 | 486 |
| YHL016C | DUR3    | 2 | msa            | na      | 91  |
| YHL016C | DUR3    | 3 | msa            | na      | 71  |
| YHL016C | DUR3    | 4 | unassigned     | na      | 87  |
| YHL017W | YHL017W | 1 | unassigned     | na      | 108 |
| YHL017W | YHL017W | 2 | msa            | na      | 355 |
| YHL017W | YHL017W | 3 | unassigned     | na      | 69  |
| YHL018W | YHL018W | 1 | psiblast       | 1dchA_  | 120 |
| YHL019C | APM2    | 1 | psiblast       | 1gw5M_  | 143 |
| YHL019C | APM2    | 2 | psiblast       | 1gw5M_  | 401 |
| YHL019C | APM2    | 3 | fold_recogniti | 1gw5M   | 61  |
| YHL020C | OPI1    | 1 | unassigned     | na      | 404 |
| YHL021C | FMP12   | 1 | unassigned     | na      | 126 |
| YHL021C | FMP12   | 2 | psiblast       | 1gy9A_  | 217 |
| YHL021C | FMP12   | 3 | psiblast       | 1gy9A_  | 122 |
| YHL022C | SPO11   | 1 | msa            | na      | 95  |
| YHL022C | SPO11   | 2 | psiblast       | 1d3yA_  | 75  |
| YHL022C | SPO11   | 3 | psiblast       | 1d3yA_  | 137 |
| YHL022C | SPO11   | 4 | psiblast       | 1d3yA_  | 91  |
| YHL023C | RMD11   | 1 | unassigned     | na      | 307 |
| YHL023C | RMD11   | 2 | pfam           | PF03666 | 839 |
| YHL024W | RIM4    | 1 | msa            | na      | 73  |
| YHL024W | RIM4    | 2 | psiblast       | 1cvjA_  | 156 |
| YHL024W | RIM4    | 3 | psiblast       | 2up1A_  | 102 |
| YHL024W | RIM4    | 4 | psiblast       | 2up1A_  | 97  |
| YHL024W | RIM4    | 5 | psiblast       | 1deqA_  | 146 |
| YHL024W | RIM4    | 6 | msa            | na      | 139 |
| YHL025W | SNF6    | 1 | unassigned     | na      | 332 |
| YHL026C | YHL026C | 1 | unassigned     | na      | 116 |
| YHL026C | YHL026C | 2 | msa            | na      | 152 |
| YHL027W | RIM101  | 1 | msa            | na      | 167 |
| YHL027W | RIM101  | 2 | psiblast       | 1a1hA_  | 96  |
| YHL027W | RIM101  | 3 | fold_recogniti | 1l2qA   | 362 |
| YHL028W | WSC4    | 1 | pfam           | PF01822 | 114 |
| YHL028W | WSC4    | 2 | msa            | na      | 167 |
| YHL028W | WSC4    | 3 | fold_recogniti | 1ei3A   | 324 |
| YHL029C | YHL029C | 1 | unassigned     | na      | 679 |
| YHL030W | ECM29   | 1 | msa            | na      | 151 |
| YHL030W | ECM29   | 2 | unassigned     | na      | 374 |
| YHL030W | ECM29   | 3 | msa            | na      | 353 |
| YHL030W | ECM29   | 4 | psiblast       | 1f59A_  | 144 |



|           |           |                  |         |     |
|-----------|-----------|------------------|---------|-----|
| YHL030W   | ECM29     | 5 unassigned     | na      | 131 |
| YHL030W   | ECM29     | 6 msa            | na      | 476 |
| YHL030W   | ECM29     | 7 unassigned     | na      | 239 |
| YHL030W-A | YHL030W-A | 1 unassigned     | na      | 153 |
| YHL031C   | GOS1      | 1 psiblast       | 1i84S_  | 135 |
| YHL031C   | GOS1      | 2 psiblast       | 1gl2C_  | 88  |
| YHL032C   | GUT1      | 1 unassigned     | na      | 103 |
| YHL032C   | GUT1      | 2 psiblast       | 1bo5O_  | 281 |
| YHL032C   | GUT1      | 3 psiblast       | 1bo5O_  | 108 |
| YHL032C   | GUT1      | 4 psiblast       | 1bo5O_  | 217 |
| YHL033C   | RPL8A     | 1 msa            | na      | 82  |
| YHL033C   | RPL8A     | 2 psiblast       | 1k5yG_  | 174 |
| YHL034C   | SBP1      | 1 psiblast       | 1cvjA_  | 150 |
| YHL034C   | SBP1      | 2 psiblast       | 1cvjA_  | 144 |
| YHL035C   | VMR1      | 1 msa            | na      | 294 |
| YHL035C   | VMR1      | 2 psiblast       | 1jsqA_  | 333 |
| YHL035C   | VMR1      | 3 psiblast       | 1jsqA_  | 315 |
| YHL035C   | VMR1      | 4 msa            | na      | 334 |
| YHL035C   | VMR1      | 5 msa            | na      | 316 |
| YHL036W   | MUP3      | 1 msa            | na      | 380 |
| YHL036W   | MUP3      | 2 msa            | na      | 166 |
| YHL037C   | YHL037C   | 1 unassigned     | na      | 159 |
| YHL038C   | CBP2      | 1 fold_recogniti | 1mukA   | 630 |
| YHL039W   | YHL039W   | 1 msa            | na      | 298 |
| YHL039W   | YHL039W   | 2 unassigned     | na      | 287 |
| YHL040C   | ARN1      | 1 unassigned     | na      | 69  |
| YHL040C   | ARN1      | 2 psiblast       | 1lviA_  | 191 |
| YHL040C   | ARN1      | 3 unassigned     | na      | 60  |
| YHL040C   | ARN1      | 4 msa            | na      | 224 |
| YHL040C   | ARN1      | 5 unassigned     | na      | 83  |
| YHL041W   | YHL041W   | 1 unassigned     | na      | 149 |
| YHL042W   | YHL042W   | 1 pfam           | PF00674 | 150 |
| YHL043W   | ECM34     | 1 msa            | na      | 68  |
| YHL043W   | ECM34     | 2 pfam           | PF00674 | 102 |
| YHL044W   | YHL044W   | 1 pfam           | PF00674 | 235 |
| YHL045W   | YHL045W   | 1 unassigned     | na      | 115 |
| YHL046C   | YHL046C   | 1 pfam           | PF00660 | 120 |
| YHL046W-A | YHL046W-A | 1 unassigned     | na      | 108 |
| YHL047C   | ARN2      | 1 unassigned     | na      | 53  |
| YHL047C   | ARN2      | 2 psiblast       | 1lviA_  | 217 |
| YHL047C   | ARN2      | 3 unassigned     | na      | 59  |
| YHL047C   | ARN2      | 4 msa            | na      | 308 |
| YHL048W   | COS8      | 1 msa            | na      | 61  |
| YHL048W   | COS8      | 2 pfam           | PF00674 | 107 |
| YHL048W   | COS8      | 3 unassigned     | na      | 71  |
| YHL048W   | COS8      | 4 pfam           | PF00674 | 142 |
| YHL049C   | YHL049C   | 1 msa            | na      | 209 |
| YHL049C   | YHL049C   | 2 msa            | na      | 62  |

|           |         |   |                |         |     |
|-----------|---------|---|----------------|---------|-----|
| YHL050C   | YHL050C | 1 | msa            | na      | 53  |
| YHL050C   | YHL050C | 2 | msa            | na      | 349 |
| YHL050C   | YHL050C | 3 | unassigned     | na      | 295 |
| YHR001W   | OSH7    | 1 | pfam           | PF01237 | 437 |
| YHR001W-A | QCR10   | 1 | unassigned     | na      | 77  |
| YHR002W   | LEU5    | 1 | pfam           | PF00153 | 129 |
| YHR002W   | LEU5    | 2 | pfam           | PF00153 | 121 |
| YHR002W   | LEU5    | 3 | pfam           | PF00153 | 107 |
| YHR003C   | YHR003C | 1 | psiblast       | 1jw9B_  | 361 |
| YHR003C   | YHR003C | 2 | unassigned     | na      | 68  |
| YHR004C   | NEM1    | 1 | unassigned     | na      | 178 |
| YHR004C   | NEM1    | 2 | pfam           | PF03031 | 268 |
| YHR005C   | GPA1    | 1 | pfam           | PF00503 | 146 |
| YHR005C   | GPA1    | 2 | psiblast       | 1scgA_  | 326 |
| YHR005C-A | MRS11   | 1 | pfam           | PF02953 | 93  |
| YHR006W   | STP2    | 1 | msa            | na      | 143 |
| YHR006W   | STP2    | 2 | psiblast       | 1lu6A_  | 82  |
| YHR006W   | STP2    | 3 | psiblast       | 1lu6A_  | 52  |
| YHR006W   | STP2    | 4 | psiblast       | 1tf6A_  | 193 |
| YHR006W   | STP2    | 5 | unassigned     | na      | 71  |
| YHR007C   | ERG11   | 1 | psiblast       | 1ea1A_  | 295 |
| YHR007C   | ERG11   | 2 | psiblast       | 1ea1A_  | 235 |
| YHR008C   | SOD2    | 1 | psiblast       | 1kkcA_  | 233 |
| YHR009C   | YHR009C | 1 | psiblast       | 1f8rA_  | 264 |
| YHR009C   | YHR009C | 2 | psiblast       | 1f8rA_  | 99  |
| YHR009C   | YHR009C | 3 | psiblast       | 1el5A_  | 160 |
| YHR010W   | RPL27A  | 1 | pfam           | PF00467 | 49  |
| YHR010W   | RPL27A  | 2 | pfam           | PF01777 | 87  |
| YHR011W   | DIA4    | 1 | psiblast       | 1serA_  | 446 |
| YHR012W   | VPS29   | 1 | psiblast       | 1ii7A_  | 222 |
| YHR012W   | VPS29   | 2 | unassigned     | na      | 60  |
| YHR013C   | ARD1    | 1 | psiblast       | 1i1dA_  | 238 |
| YHR014W   | SPO13   | 1 | unassigned     | na      | 291 |
| YHR015W   | MIP6    | 1 | unassigned     | na      | 96  |
| YHR015W   | MIP6    | 2 | psiblast       | 1cvjA_  | 93  |
| YHR015W   | MIP6    | 3 | psiblast       | 1cvjA_  | 105 |
| YHR015W   | MIP6    | 4 | psiblast       | 1b7fA_  | 95  |
| YHR015W   | MIP6    | 5 | psiblast       | 1b7fA_  | 154 |
| YHR015W   | MIP6    | 6 | unassigned     | na      | 116 |
| YHR016C   | YSC84   | 1 | msa            | na      | 80  |
| YHR016C   | YSC84   | 2 | fold_recogniti | 1k83A   | 333 |
| YHR016C   | YSC84   | 3 | psiblast       | 1semA_  | 55  |
| YHR017W   | YSC83   | 1 | unassigned     | na      | 385 |
| YHR018C   | ARG4    | 1 | psiblast       | 1aosA_  | 194 |
| YHR018C   | ARG4    | 2 | psiblast       | 1aosA_  | 205 |
| YHR018C   | ARG4    | 3 | psiblast       | 1aosA_  | 64  |
| YHR019C   | DED81   | 1 | unassigned     | na      | 104 |
| YHR019C   | DED81   | 2 | psiblast       | 1b8aA_  | 122 |

|           |         |   |                |         |      |
|-----------|---------|---|----------------|---------|------|
| YHR019C   | DED81   | 3 | psiblast       | 1b8aA_  | 328  |
| YHR020W   | YHR020W | 1 | psiblast       | 1qf6A_  | 586  |
| YHR020W   | YHR020W | 2 | psiblast       | 1h4qA_  | 102  |
| YHR021C   | RPS27B  | 1 | pfam           | PF01667 | 82   |
| YHR021W-A | ECM12   | 1 | unassigned     | na      | 151  |
| YHR022C   | YHR022C | 1 | psiblast       | 3rabA_  | 256  |
| YHR023W   | MYO1    | 1 | psiblast       | 1i84S_  | 1171 |
| YHR023W   | MYO1    | 2 | msa            | na      | 224  |
| YHR023W   | MYO1    | 3 | psiblast       | 1cii__  | 448  |
| YHR023W   | MYO1    | 4 | psiblast       | 1c1gA_  | 85   |
| YHR024C   | MAS2    | 1 | psiblast       | 1hr6A_  | 238  |
| YHR024C   | MAS2    | 2 | psiblast       | 1hr6A_  | 244  |
| YHR025W   | THR1    | 1 | psiblast       | 1fwkA_  | 222  |
| YHR025W   | THR1    | 2 | psiblast       | 1fwkA_  | 135  |
| YHR026W   | PPA1    | 1 | pfam           | PF00137 | 133  |
| YHR026W   | PPA1    | 2 | msa            | na      | 80   |
| YHR027C   | RPN1    | 1 | msa            | na      | 177  |
| YHR027C   | RPN1    | 2 | unassigned     | na      | 80   |
| YHR027C   | RPN1    | 3 | fold_recogniti | 1b89A   | 493  |
| YHR027C   | RPN1    | 4 | msa            | na      | 243  |
| YHR028C   | DAP2    | 1 | psiblast       | 1erjA_  | 257  |
| YHR028C   | DAP2    | 2 | psiblast       | 1qfsA_  | 287  |
| YHR028C   | DAP2    | 3 | psiblast       | 1qfsA_  | 274  |
| YHR029C   | YHR029C | 1 | psiblast       | 1bwzA_  | 137  |
| YHR029C   | YHR029C | 2 | psiblast       | 1bwzA_  | 157  |
| YHR030C   | SLT2    | 1 | psiblast       | 1erk__  | 172  |
| YHR030C   | SLT2    | 2 | psiblast       | 1erk__  | 239  |
| YHR030C   | SLT2    | 3 | unassigned     | na      | 73   |
| YHR031C   | RRM3    | 1 | msa            | na      | 84   |
| YHR031C   | RRM3    | 2 | unassigned     | na      | 61   |
| YHR031C   | RRM3    | 3 | psiblast       | 1fts__  | 81   |
| YHR031C   | RRM3    | 4 | psiblast       | 1pjr__  | 497  |
| YHR032W   | YHR032W | 1 | unassigned     | na      | 144  |
| YHR032W   | YHR032W | 2 | fold_recogniti | 1b3uA   | 176  |
| YHR032W   | YHR032W | 3 | fold_recogniti | 1b3uA   | 261  |
| YHR033W   | YHR033W | 1 | psiblast       | 1b7bA_  | 267  |
| YHR033W   | YHR033W | 2 | pfam           | PF01472 | 156  |
| YHR034C   | PIH1    | 1 | msa            | na      | 204  |
| YHR034C   | PIH1    | 2 | unassigned     | na      | 140  |
| YHR035W   | YHR035W | 1 | msa            | na      | 56   |
| YHR035W   | YHR035W | 2 | unassigned     | na      | 83   |
| YHR035W   | YHR035W | 3 | msa            | na      | 342  |
| YHR035W   | YHR035W | 4 | psiblast       | 1svy__  | 149  |
| YHR036W   | YHR036W | 1 | unassigned     | na      | 182  |
| YHR036W   | YHR036W | 2 | msa            | na      | 289  |
| YHR037W   | PUT2    | 1 | psiblast       | 1bxsA_  | 369  |
| YHR037W   | PUT2    | 2 | psiblast       | 1bxsA_  | 206  |
| YHR038W   | RRF1    | 1 | psiblast       | 1eh1A_  | 154  |

|           |           |   |                |         |     |
|-----------|-----------|---|----------------|---------|-----|
| YHR038W   | RRF1      | 2 | psiblast       | 1eh1A_  | 76  |
| YHR039C   | MSC7      | 1 | unassigned     | na      | 67  |
| YHR039C   | MSC7      | 2 | psiblast       | 1bxsA_  | 379 |
| YHR039C   | MSC7      | 3 | psiblast       | 1bxsA_  | 198 |
| YHR039C-A | VMA10     | 1 | pfam           | PF03179 | 114 |
| YHR040W   | BCD1      | 1 | msa            | na      | 72  |
| YHR040W   | BCD1      | 2 | msa            | na      | 294 |
| YHR041C   | SRB2      | 1 | unassigned     | na      | 210 |
| YHR042W   | NCP1      | 1 | psiblast       | 1amoA_  | 223 |
| YHR042W   | NCP1      | 2 | psiblast       | 1amoA_  | 166 |
| YHR042W   | NCP1      | 3 | psiblast       | 1amoA_  | 135 |
| YHR042W   | NCP1      | 4 | psiblast       | 1amoA_  | 167 |
| YHR043C   | DOG2      | 1 | psiblast       | 1jud__  | 188 |
| YHR043C   | DOG2      | 2 | psiblast       | 1jud__  | 58  |
| YHR044C   | DOG1      | 1 | psiblast       | 1jud__  | 188 |
| YHR044C   | DOG1      | 2 | psiblast       | 1jud__  | 58  |
| YHR045W   | YHR045W   | 1 | unassigned     | na      | 560 |
| YHR046C   | INM1      | 1 | psiblast       | 1imaA_  | 149 |
| YHR046C   | INM1      | 2 | psiblast       | 1imaA_  | 146 |
| YHR047C   | AAP1'     | 1 | psiblast       | 1hs6A_  | 205 |
| YHR047C   | AAP1'     | 2 | psiblast       | 1hs6A_  | 93  |
| YHR047C   | AAP1'     | 3 | psiblast       | 1hs6A_  | 177 |
| YHR047C   | AAP1'     | 4 | fold_recogniti | 1gw5B   | 123 |
| YHR047C   | AAP1'     | 5 | fold_recogniti | 1gw5B   | 98  |
| YHR047C   | AAP1'     | 6 | fold_recogniti | 1gw5B   | 160 |
| YHR048W   | YHR048W   | 1 | psiblast       | 1ja5A_  | 514 |
| YHR049C-A | YHR049C-A | 1 | unassigned     | na      | 103 |
| YHR049W   | FSH1      | 1 | fold_recogniti | 1fj2A   | 243 |
| YHR050W   | SMF2      | 1 | unassigned     | na      | 75  |
| YHR050W   | SMF2      | 2 | pfam           | PF01566 | 420 |
| YHR050W   | SMF2      | 3 | unassigned     | na      | 54  |
| YHR051W   | COX6      | 1 | psiblast       | 1occE_  | 148 |
| YHR052W   | CIC1      | 1 | psiblast       | 1eg0N_  | 223 |
| YHR052W   | CIC1      | 2 | psiblast       | 1eg0N_  | 88  |
| YHR052W   | CIC1      | 3 | unassigned     | na      | 65  |
| YHR053C   | CUP1-1    | 1 | psiblast       | 1aqs__  | 61  |
| YHR054C   | YHR054C   | 1 | unassigned     | na      | 354 |
| YHR056C   | RSC30     | 1 | unassigned     | na      | 477 |
| YHR056C   | RSC30     | 2 | msa            | na      | 355 |
| YHR056W-A | YHR056W-A | 1 | unassigned     | na      | 143 |
| YHR057C   | CPR2      | 1 | psiblast       | 1cynA_  | 205 |
| YHR058C   | MED6      | 1 | msa            | na      | 232 |
| YHR058C   | MED6      | 2 | unassigned     | na      | 63  |
| YHR059W   | FYV4      | 1 | unassigned     | na      | 130 |
| YHR060W   | VMA22     | 1 | unassigned     | na      | 181 |
| YHR061C   | GIC1      | 1 | unassigned     | na      | 99  |
| YHR061C   | GIC1      | 2 | pfam           | PF00786 | 142 |
| YHR061C   | GIC1      | 3 | unassigned     | na      | 73  |

|           |           |   |                |         |     |
|-----------|-----------|---|----------------|---------|-----|
| YHR062C   | RPP1      | 1 | unassigned     | na      | 61  |
| YHR062C   | RPP1      | 2 | pfam           | PF01876 | 232 |
| YHR063C   | PAN5      | 1 | psiblast       | 1ks9A_  | 220 |
| YHR063C   | PAN5      | 2 | psiblast       | 1ks9A_  | 159 |
| YHR063W-A | YHR063W-A | 1 | unassigned     | na      | 111 |
| YHR064C   | SSZ1      | 1 | psiblast       | 1hpm__  | 229 |
| YHR064C   | SSZ1      | 2 | psiblast       | 1hpm__  | 124 |
| YHR064C   | SSZ1      | 3 | psiblast       | 1hpm__  | 75  |
| YHR064C   | SSZ1      | 4 | psiblast       | 1ckrA_  | 144 |
| YHR065C   | RRP3      | 1 | unassigned     | na      | 114 |
| YHR065C   | RRP3      | 2 | psiblast       | 1hv8A_  | 219 |
| YHR065C   | RRP3      | 3 | psiblast       | 1hv8A_  | 210 |
| YHR066W   | SSF1      | 1 | pfam           | PF03877 | 294 |
| YHR066W   | SSF1      | 2 | unassigned     | na      | 78  |
| YHR066W   | SSF1      | 3 | msa            | na      | 81  |
| YHR067W   | RMD12     | 1 | unassigned     | na      | 280 |
| YHR068W   | DYS1      | 1 | psiblast       | 1dhs__  | 387 |
| YHR069C   | RRP4      | 1 | psiblast       | 1e3pA_  | 189 |
| YHR069C   | RRP4      | 2 | msa            | na      | 98  |
| YHR069C   | RRP4      | 3 | unassigned     | na      | 72  |
| YHR070C-A | YHR070C-A | 1 | unassigned     | na      | 136 |
| YHR070W   | TRM5      | 1 | unassigned     | na      | 106 |
| YHR070W   | TRM5      | 2 | psiblast       | 1g60A_  | 221 |
| YHR070W   | TRM5      | 3 | psiblast       | 1dusA_  | 52  |
| YHR070W   | TRM5      | 4 | unassigned     | na      | 120 |
| YHR071W   | PCL5      | 1 | psiblast       | 1vin__  | 229 |
| YHR072W   | ERG7      | 1 | psiblast       | 1sqc__  | 248 |
| YHR072W   | ERG7      | 2 | psiblast       | 1sqc__  | 179 |
| YHR072W   | ERG7      | 3 | psiblast       | 1sqc__  | 138 |
| YHR072W   | ERG7      | 4 | psiblast       | 1sqc__  | 166 |
| YHR072W-A | NOP10     | 1 | unassigned     | na      | 58  |
| YHR073W   | OSH3      | 1 | psiblast       | 1pls__  | 109 |
| YHR073W   | OSH3      | 2 | unassigned     | na      | 90  |
| YHR073W   | OSH3      | 3 | psiblast       | 1qqgA_  | 142 |
| YHR073W   | OSH3      | 4 | psiblast       | 1qqgA_  | 129 |
| YHR073W   | OSH3      | 5 | unassigned     | na      | 133 |
| YHR073W   | OSH3      | 6 | msa            | na      | 393 |
| YHR074W   | QNS1      | 1 | psiblast       | 1f89A_  | 313 |
| YHR074W   | QNS1      | 2 | psiblast       | 1ee1A_  | 345 |
| YHR074W   | QNS1      | 3 | unassigned     | na      | 56  |
| YHR075C   | PPE1      | 1 | unassigned     | na      | 89  |
| YHR075C   | PPE1      | 2 | psiblast       | 1cqzA_  | 311 |
| YHR076W   | PTC7      | 1 | unassigned     | na      | 82  |
| YHR076W   | PTC7      | 2 | psiblast       | 1a6q__  | 292 |
| YHR077C   | NMD2      | 1 | pfam           | PF02854 | 272 |
| YHR077C   | NMD2      | 2 | unassigned     | na      | 64  |
| YHR077C   | NMD2      | 3 | fold_recogniti | 1h2vC   | 253 |
| YHR077C   | NMD2      | 4 | psiblast       | 1i84S_  | 355 |

|           |         |   |                |         |     |
|-----------|---------|---|----------------|---------|-----|
| YHR077C   | NMD2    | 5 | psiblast       | 2tmaA_  | 145 |
| YHR078W   | YHR078W | 1 | unassigned     | na      | 241 |
| YHR078W   | YHR078W | 2 | fold_recogniti | 1qoyA   | 311 |
| YHR079C   | IRE1    | 1 | fold_recogniti | 1h4iA   | 471 |
| YHR079C   | IRE1    | 2 | unassigned     | na      | 166 |
| YHR079C   | IRE1    | 3 | psiblast       | 1gy3A_  | 93  |
| YHR079C   | IRE1    | 4 | psiblast       | 1gy3A_  | 330 |
| YHR079C   | IRE1    | 5 | unassigned     | na      | 55  |
| YHR079C-A | SAE3    | 1 | unassigned     | na      | 50  |
| YHR080C   | YHR080C | 1 | msa            | na      | 546 |
| YHR080C   | YHR080C | 2 | pfam           | PF02893 | 118 |
| YHR080C   | YHR080C | 3 | msa            | na      | 293 |
| YHR080C   | YHR080C | 4 | unassigned     | na      | 81  |
| YHR080C   | YHR080C | 5 | msa            | na      | 307 |
| YHR081W   | LRP1    | 1 | unassigned     | na      | 184 |
| YHR082C   | KSP1    | 1 | psiblast       | 1gxcA_  | 81  |
| YHR082C   | KSP1    | 2 | psiblast       | 1b6cB_  | 227 |
| YHR082C   | KSP1    | 3 | psiblast       | 1a06__  | 83  |
| YHR082C   | KSP1    | 4 | psiblast       | 1iq5A_  | 72  |
| YHR082C   | KSP1    | 5 | psiblast       | 1iq5A_  | 93  |
| YHR082C   | KSP1    | 6 | unassigned     | na      | 473 |
| YHR083W   | SAM35   | 1 | unassigned     | na      | 111 |
| YHR083W   | SAM35   | 2 | msa            | na      | 218 |
| YHR084W   | STE12   | 1 | pfam           | PF02200 | 200 |
| YHR084W   | STE12   | 2 | unassigned     | na      | 488 |
| YHR085W   | IPI1    | 1 | msa            | na      | 230 |
| YHR085W   | IPI1    | 2 | unassigned     | na      | 104 |
| YHR086W   | NAM8    | 1 | psiblast       | 1cvjA_  | 164 |
| YHR086W   | NAM8    | 2 | psiblast       | 1qm9A_  | 139 |
| YHR086W   | NAM8    | 3 | psiblast       | 1qm9A_  | 93  |
| YHR086W   | NAM8    | 4 | msa            | na      | 127 |
| YHR087W   | YHR087W | 1 | unassigned     | na      | 111 |
| YHR088W   | RPF1    | 1 | unassigned     | na      | 93  |
| YHR088W   | RPF1    | 2 | pfam           | PF01945 | 202 |
| YHR089C   | GAR1    | 1 | msa            | na      | 130 |
| YHR089C   | GAR1    | 2 | fold_recogniti | 1la5A   | 75  |
| YHR090C   | YNG2    | 1 | fold_recogniti | 2vsgA   | 161 |
| YHR090C   | YNG2    | 2 | fold_recogniti | 2vsgA   | 45  |
| YHR090C   | YNG2    | 3 | psiblast       | 1f62A_  | 76  |
| YHR091C   | MSR1    | 1 | psiblast       | 1bs2A_  | 151 |
| YHR091C   | MSR1    | 2 | psiblast       | 1bs2A_  | 214 |
| YHR091C   | MSR1    | 3 | psiblast       | 1bs2A_  | 198 |
| YHR091C   | MSR1    | 4 | psiblast       | 1bs2A_  | 80  |
| YHR092C   | HXT4    | 1 | psiblast       | 1ja5A_  | 478 |
| YHR092C   | HXT4    | 2 | psiblast       | 1ja5A_  | 82  |
| YHR093W   | AHT1    | 1 | unassigned     | na      | 182 |
| YHR094C   | HXT1    | 1 | psiblast       | 1ja5A_  | 469 |
| YHR094C   | HXT1    | 2 | psiblast       | 1ja5A_  | 101 |

|         |         |    |                |         |     |
|---------|---------|----|----------------|---------|-----|
| YHR095W | YHR095W | 1  | unassigned     | na      | 144 |
| YHR096C | HXT5    | 1  | unassigned     | na      | 58  |
| YHR096C | HXT5    | 2  | psiblast       | 1ja5A_  | 435 |
| YHR096C | HXT5    | 3  | psiblast       | 1ja5A_  | 99  |
| YHR097C | YHR097C | 1  | unassigned     | na      | 122 |
| YHR097C | YHR097C | 2  | msa            | na      | 164 |
| YHR097C | YHR097C | 3  | unassigned     | na      | 80  |
| YHR098C | SFB3    | 1  | psiblast       | 1deqA_  | 175 |
| YHR098C | SFB3    | 2  | unassigned     | na      | 157 |
| YHR098C | SFB3    | 3  | msa            | na      | 318 |
| YHR098C | SFB3    | 4  | unassigned     | na      | 57  |
| YHR098C | SFB3    | 5  | msa            | na      | 222 |
| YHR099W | TRA1    | 1  | msa            | na      | 522 |
| YHR099W | TRA1    | 2  | unassigned     | na      | 825 |
| YHR099W | TRA1    | 3  | msa            | na      | 762 |
| YHR099W | TRA1    | 4  | unassigned     | na      | 302 |
| YHR099W | TRA1    | 5  | msa            | na      | 186 |
| YHR099W | TRA1    | 6  | pfam           | PF02259 | 596 |
| YHR099W | TRA1    | 7  | psiblast       | 1he8A_  | 122 |
| YHR099W | TRA1    | 8  | psiblast       | 1he8A_  | 121 |
| YHR099W | TRA1    | 9  | psiblast       | 1he8A_  | 272 |
| YHR099W | TRA1    | 10 | pfam           | PF02260 | 36  |
| YHR100C | YHR100C | 1  | psiblast       | 1zrm__  | 185 |
| YHR101C | BIG1    | 1  | unassigned     | na      | 335 |
| YHR102W | KIC1    | 1  | psiblast       | 1f3mC_  | 101 |
| YHR102W | KIC1    | 2  | psiblast       | 1f3mC_  | 206 |
| YHR102W | KIC1    | 3  | psiblast       | 1cdmA_  | 83  |
| YHR102W | KIC1    | 4  | psiblast       | 1cdmA_  | 80  |
| YHR102W | KIC1    | 5  | fold_recogniti | 1ei3A   | 195 |
| YHR102W | KIC1    | 6  | fold_recogniti | 1l8mA   | 83  |
| YHR102W | KIC1    | 7  | fold_recogniti | 1l8mA   | 73  |
| YHR102W | KIC1    | 8  | fold_recogniti | 1l8mA   | 79  |
| YHR102W | KIC1    | 9  | fold_recogniti | 1l8mA   | 72  |
| YHR102W | KIC1    | 10 | unassigned     | na      | 108 |
| YHR103W | SBE22   | 1  | fold_recogniti | 1k83A   | 356 |
| YHR103W | SBE22   | 2  | unassigned     | na      | 63  |
| YHR103W | SBE22   | 3  | msa            | na      | 189 |
| YHR103W | SBE22   | 4  | unassigned     | na      | 244 |
| YHR104W | GRE3    | 1  | psiblast       | 1jezA_  | 327 |
| YHR105W | YPT35   | 1  | fold_recogniti | 1h6hA   | 214 |
| YHR106W | TRR2    | 1  | psiblast       | 1vdc__  | 216 |
| YHR106W | TRR2    | 2  | psiblast       | 1vdc__  | 126 |
| YHR107C | CDC12   | 1  | psiblast       | 1egaA_  | 274 |
| YHR107C | CDC12   | 2  | msa            | na      | 133 |
| YHR108W | GGA2    | 1  | psiblast       | 1elkA_  | 96  |
| YHR108W | GGA2    | 2  | psiblast       | 1elkA_  | 100 |
| YHR108W | GGA2    | 3  | pfam           | PF03127 | 141 |
| YHR108W | GGA2    | 4  | unassigned     | na      | 108 |

|         |         |   |                |         |     |
|---------|---------|---|----------------|---------|-----|
| YHR108W | GGA2    | 5 | psiblast       | 1iu1A_  | 140 |
| YHR109W | CTM1    | 1 | unassigned     | na      | 585 |
| YHR110W | ERP5    | 1 | pfam           | PF01105 | 212 |
| YHR111W | UBA4    | 1 | psiblast       | 1jw9B_  | 290 |
| YHR111W | UBA4    | 2 | psiblast       | 1h4kX_  | 150 |
| YHR112C | YHR112C | 1 | psiblast       | 1ibjA_  | 262 |
| YHR112C | YHR112C | 2 | psiblast       | 1ibjA_  | 116 |
| YHR113W | YHR113W | 1 | pfam           | PF02127 | 490 |
| YHR114W | BZZ1    | 1 | psiblast       | 1i84S_  | 420 |
| YHR114W | BZZ1    | 2 | unassigned     | na      | 75  |
| YHR114W | BZZ1    | 3 | psiblast       | 1pnj__  | 70  |
| YHR114W | BZZ1    | 4 | psiblast       | 1gcqA_  | 68  |
| YHR115C | YHR115C | 1 | unassigned     | na      | 118 |
| YHR115C | YHR115C | 2 | psiblast       | 1fbvA_  | 245 |
| YHR115C | YHR115C | 3 | psiblast       | 1fbvA_  | 53  |
| YHR116W | YHR116W | 1 | unassigned     | na      | 151 |
| YHR117W | TOM71   | 1 | unassigned     | na      | 121 |
| YHR117W | TOM71   | 2 | psiblast       | 1a17__  | 66  |
| YHR117W | TOM71   | 3 | fold_recogniti | 1jcqA   | 153 |
| YHR117W | TOM71   | 4 | psiblast       | 1elrA_  | 103 |
| YHR117W | TOM71   | 5 | msa            | na      | 196 |
| YHR118C | ORC6    | 1 | unassigned     | na      | 435 |
| YHR119W | SET1    | 1 | unassigned     | na      | 286 |
| YHR119W | SET1    | 2 | msa            | na      | 521 |
| YHR119W | SET1    | 3 | unassigned     | na      | 94  |
| YHR119W | SET1    | 4 | pfam           | PF00856 | 179 |
| YHR120W | MSH1    | 1 | unassigned     | na      | 68  |
| YHR120W | MSH1    | 2 | psiblast       | 1e3mA_  | 117 |
| YHR120W | MSH1    | 3 | psiblast       | 1e3mA_  | 175 |
| YHR120W | MSH1    | 4 | psiblast       | 1e3mA_  | 269 |
| YHR120W | MSH1    | 5 | psiblast       | 1e3mA_  | 239 |
| YHR120W | MSH1    | 6 | psiblast       | 1e3mA_  | 91  |
| YHR121W | YHR121W | 1 | unassigned     | na      | 187 |
| YHR122W | YHR122W | 1 | unassigned     | na      | 100 |
| YHR122W | YHR122W | 2 | pfam           | PF01883 | 131 |
| YHR123W | EPT1    | 1 | unassigned     | na      | 75  |
| YHR123W | EPT1    | 2 | pfam           | PF01066 | 182 |
| YHR123W | EPT1    | 3 | msa            | na      | 134 |
| YHR124W | NDT80   | 1 | msa            | na      | 434 |
| YHR124W | NDT80   | 2 | unassigned     | na      | 193 |
| YHR125W | YHR125W | 1 | unassigned     | na      | 101 |
| YHR126C | YHR126C | 1 | unassigned     | na      | 159 |
| YHR127W | YHR127W | 1 | unassigned     | na      | 243 |
| YHR128W | FUR1    | 1 | psiblast       | 1bd3D_  | 251 |
| YHR129C | ARP1    | 1 | psiblast       | 1d4xA_  | 181 |
| YHR129C | ARP1    | 2 | psiblast       | 1d4xA_  | 203 |
| YHR130C | YHR130C | 1 | unassigned     | na      | 111 |
| YHR131C | YHR131C | 1 | unassigned     | na      | 181 |



|           |           |   |                |         |     |
|-----------|-----------|---|----------------|---------|-----|
| YHR131C   | YHR131C   | 2 | pfam           | PF00169 | 146 |
| YHR131C   | YHR131C   | 3 | msa            | na      | 147 |
| YHR131C   | YHR131C   | 4 | unassigned     | na      | 265 |
| YHR131C   | YHR131C   | 5 | msa            | na      | 101 |
| YHR131W-A | YHR131W-A | 1 | unassigned     | na      | 115 |
| YHR132C   | ECM14     | 1 | psiblast       | 1aye__  | 89  |
| YHR132C   | ECM14     | 2 | psiblast       | 1aye__  | 341 |
| YHR132W-A | YHR132W-A | 1 | unassigned     | na      | 131 |
| YHR133C   | NSG1      | 1 | unassigned     | na      | 291 |
| YHR134W   | WSS1      | 1 | msa            | na      | 186 |
| YHR134W   | WSS1      | 2 | unassigned     | na      | 83  |
| YHR135C   | YCK1      | 1 | psiblast       | 1csn__  | 127 |
| YHR135C   | YCK1      | 2 | psiblast       | 1csn__  | 75  |
| YHR135C   | YCK1      | 3 | psiblast       | 1csn__  | 214 |
| YHR135C   | YCK1      | 4 | unassigned     | na      | 122 |
| YHR136C   | SPL2      | 1 | unassigned     | na      | 148 |
| YHR137W   | ARO9      | 1 | psiblast       | 1bkgA_  | 376 |
| YHR137W   | ARO9      | 2 | psiblast       | 1bkgA_  | 137 |
| YHR138C   | YHR138C   | 1 | unassigned     | na      | 114 |
| YHR139C   | SPS100    | 1 | psiblast       | 1agx__  | 211 |
| YHR139C   | SPS100    | 2 | psiblast       | 1agx__  | 115 |
| YHR139C-A | YHR139C-A | 1 | unassigned     | na      | 103 |
| YHR140W   | YHR140W   | 1 | msa            | na      | 239 |
| YHR141C   | RPL42B    | 1 | psiblast       | 1k5y1_  | 106 |
| YHR142W   | CHS7      | 1 | unassigned     | na      | 201 |
| YHR142W   | CHS7      | 2 | msa            | na      | 115 |
| YHR143W   | DSE2      | 1 | psiblast       | 1acc__  | 208 |
| YHR143W   | DSE2      | 2 | unassigned     | na      | 117 |
| YHR143W-A | RPC10     | 1 | psiblast       | 1k83L_  | 70  |
| YHR144C   | DCD1      | 1 | unassigned     | na      | 111 |
| YHR144C   | DCD1      | 2 | fold_recogniti | 1jtkA   | 201 |
| YHR145C   | YHR145C   | 1 | unassigned     | na      | 118 |
| YHR146W   | CRP1      | 1 | msa            | na      | 86  |
| YHR146W   | CRP1      | 2 | fold_recogniti | 1deqA   | 62  |
| YHR146W   | CRP1      | 3 | fold_recogniti | 1m2vB   | 317 |
| YHR147C   | MRPL6     | 1 | psiblast       | 1c04B_  | 117 |
| YHR147C   | MRPL6     | 2 | psiblast       | 1c04B_  | 97  |
| YHR148W   | IMP3      | 1 | psiblast       | 1k5xD_  | 67  |
| YHR148W   | IMP3      | 2 | psiblast       | 1k5xD_  | 116 |
| YHR149C   | SKG6      | 1 | unassigned     | na      | 135 |
| YHR149C   | SKG6      | 2 | msa            | na      | 401 |
| YHR149C   | SKG6      | 3 | unassigned     | na      | 198 |
| YHR150W   | PEX28     | 1 | unassigned     | na      | 159 |
| YHR150W   | PEX28     | 2 | msa            | na      | 177 |
| YHR150W   | PEX28     | 3 | msa            | na      | 243 |
| YHR151C   | YHR151C   | 1 | unassigned     | na      | 526 |
| YHR152W   | SPO12     | 1 | unassigned     | na      | 173 |
| YHR153C   | SPO16     | 1 | unassigned     | na      | 198 |

|         |         |   |                |         |     |
|---------|---------|---|----------------|---------|-----|
| YHR154W | RTT107  | 1 | fold_recogniti | 1l0bA   | 119 |
| YHR154W | RTT107  | 2 | fold_recogniti | 1l0bA   | 141 |
| YHR154W | RTT107  | 3 | unassigned     | na      | 99  |
| YHR154W | RTT107  | 4 | fold_recogniti | 1dgsA   | 93  |
| YHR154W | RTT107  | 5 | psiblast       | 1i84S_  | 295 |
| YHR154W | RTT107  | 6 | psiblast       | 2tmaA_  | 87  |
| YHR154W | RTT107  | 7 | msa            | na      | 236 |
| YHR155W | YHR155W | 1 | msa            | na      | 113 |
| YHR155W | YHR155W | 2 | psiblast       | 1pbv__  | 76  |
| YHR155W | YHR155W | 3 | psiblast       | 1pbv__  | 107 |
| YHR155W | YHR155W | 4 | psiblast       | 1eazA_  | 171 |
| YHR155W | YHR155W | 5 | psiblast       | 1dcqA_  | 104 |
| YHR155W | YHR155W | 6 | unassigned     | na      | 657 |
| YHR156C | LIN1    | 1 | msa            | na      | 280 |
| YHR156C | LIN1    | 2 | psiblast       | 1gyfA_  | 60  |
| YHR157W | REC104  | 1 | unassigned     | na      | 182 |
| YHR158C | KEL1    | 1 | unassigned     | na      | 75  |
| YHR158C | KEL1    | 2 | msa            | na      | 101 |
| YHR158C | KEL1    | 3 | pfam           | PF01344 | 102 |
| YHR158C | KEL1    | 4 | pfam           | PF01344 | 63  |
| YHR158C | KEL1    | 5 | psiblast       | 1dg3A_  | 240 |
| YHR158C | KEL1    | 6 | psiblast       | 1cii__  | 145 |
| YHR158C | KEL1    | 7 | psiblast       | 1cii__  | 242 |
| YHR158C | KEL1    | 8 | psiblast       | 1i84S_  | 196 |
| YHR159W | YHR159W | 1 | unassigned     | na      | 172 |
| YHR159W | YHR159W | 2 | msa            | na      | 332 |
| YHR160C | PEX18   | 1 | unassigned     | na      | 283 |
| YHR161C | YAP1801 | 1 | psiblast       | 1hf8A_  | 148 |
| YHR161C | YAP1801 | 2 | psiblast       | 1hf8A_  | 123 |
| YHR161C | YAP1801 | 3 | unassigned     | na      | 67  |
| YHR161C | YAP1801 | 4 | msa            | na      | 299 |
| YHR162W | YHR162W | 1 | pfam           | PF03650 | 129 |
| YHR163W | SOL3    | 1 | psiblast       | 1d9tA_  | 280 |
| YHR164C | DNA2    | 1 | unassigned     | na      | 435 |
| YHR164C | DNA2    | 2 | msa            | na      | 319 |
| YHR164C | DNA2    | 3 | psiblast       | 1gm5A_  | 182 |
| YHR164C | DNA2    | 4 | psiblast       | 1gm5A_  | 295 |
| YHR164C | DNA2    | 5 | psiblast       | 1pjr__  | 192 |
| YHR164C | DNA2    | 6 | psiblast       | 1qhhD_  | 99  |
| YHR165C | PRP8    | 1 | msa            | na      | 237 |
| YHR165C | PRP8    | 2 | unassigned     | na      | 566 |
| YHR165C | PRP8    | 3 | msa            | na      | 219 |
| YHR165C | PRP8    | 4 | unassigned     | na      | 260 |
| YHR165C | PRP8    | 5 | msa            | na      | 786 |
| YHR165C | PRP8    | 6 | unassigned     | na      | 83  |
| YHR165C | PRP8    | 7 | msa            | na      | 171 |
| YHR165C | PRP8    | 8 | unassigned     | na      | 91  |
| YHR166C | CDC23   | 1 | unassigned     | na      | 112 |

|         |         |   |                |         |     |
|---------|---------|---|----------------|---------|-----|
| YHR166C | CDC23   | 2 | psiblast       | 1a17__  | 91  |
| YHR166C | CDC23   | 3 | psiblast       | 1fchA_  | 140 |
| YHR166C | CDC23   | 4 | psiblast       | 1fchA_  | 68  |
| YHR166C | CDC23   | 5 | psiblast       | 1fchA_  | 86  |
| YHR166C | CDC23   | 6 | psiblast       | 1jcqA_  | 129 |
| YHR167W | THP2    | 1 | unassigned     | na      | 261 |
| YHR168W | YHR168W | 1 | pfam           | PF01018 | 324 |
| YHR168W | YHR168W | 2 | psiblast       | 1ksgA_  | 175 |
| YHR169W | DBP8    | 1 | psiblast       | 1hv8A_  | 222 |
| YHR169W | DBP8    | 2 | psiblast       | 1hv8A_  | 209 |
| YHR170W | NMD3    | 1 | msa            | na      | 268 |
| YHR170W | NMD3    | 2 | unassigned     | na      | 164 |
| YHR170W | NMD3    | 3 | msa            | na      | 86  |
| YHR171W | ATG7    | 1 | unassigned     | na      | 293 |
| YHR171W | ATG7    | 2 | psiblast       | 1jw9B_  | 337 |
| YHR172W | SPC97   | 1 | unassigned     | na      | 53  |
| YHR172W | SPC97   | 2 | msa            | na      | 377 |
| YHR172W | SPC97   | 3 | unassigned     | na      | 114 |
| YHR172W | SPC97   | 4 | fold_recogniti | 1ldjA   | 279 |
| YHR173C | YHR173C | 1 | unassigned     | na      | 112 |
| YHR174W | ENO2    | 1 | psiblast       | 1els__  | 127 |
| YHR174W | ENO2    | 2 | psiblast       | 1els__  | 310 |
| YHR175W | CTR2    | 1 | unassigned     | na      | 189 |
| YHR176W | FMO1    | 1 | psiblast       | 1ebdA_  | 183 |
| YHR176W | FMO1    | 2 | psiblast       | 1ebdA_  | 190 |
| YHR177W | GON3    | 1 | msa            | na      | 210 |
| YHR177W | GON3    | 2 | unassigned     | na      | 243 |
| YHR178W | STB5    | 1 | psiblast       | 1cld__  | 111 |
| YHR178W | STB5    | 2 | unassigned     | na      | 64  |
| YHR178W | STB5    | 3 | msa            | na      | 568 |
| YHR179W | OYE2    | 1 | psiblast       | 1oya__  | 400 |
| YHR180W | YHR180W | 1 | unassigned     | na      | 163 |
| YHR181W | SVP26   | 1 | msa            | na      | 228 |
| YHR182W | YHR182W | 1 | unassigned     | na      | 785 |
| YHR183W | GND1    | 1 | psiblast       | 1pgn__  | 179 |
| YHR183W | GND1    | 2 | psiblast       | 1pgn__  | 310 |
| YHR184W | SSP1    | 1 | unassigned     | na      | 163 |
| YHR184W | SSP1    | 2 | fold_recogniti | 1jkyA   | 229 |
| YHR184W | SSP1    | 3 | fold_recogniti | 1jkyA   | 179 |
| YHR185C | PFS1    | 1 | unassigned     | na      | 237 |
| YHR186C | KOG1    | 1 | fold_recogniti | 1bk6A   | 792 |
| YHR186C | KOG1    | 2 | msa            | na      | 225 |
| YHR186C | KOG1    | 3 | psiblast       | 1k8kC_  | 367 |
| YHR186C | KOG1    | 4 | psiblast       | 1gg2B_  | 173 |
| YHR187W | IKI1    | 1 | unassigned     | na      | 309 |
| YHR188C | GPI16   | 1 | unassigned     | na      | 114 |
| YHR188C | GPI16   | 2 | msa            | na      | 153 |
| YHR188C | GPI16   | 3 | unassigned     | na      | 343 |

|         |         |   |                |         |     |
|---------|---------|---|----------------|---------|-----|
| YHR189W | PTH1    | 1 | psiblast       | 2pth__  | 129 |
| YHR189W | PTH1    | 2 | psiblast       | 2pth__  | 61  |
| YHR190W | ERG9    | 1 | psiblast       | 1ezfA_  | 184 |
| YHR190W | ERG9    | 2 | psiblast       | 1ezfA_  | 260 |
| YHR191C | CTF8    | 1 | unassigned     | na      | 133 |
| YHR192W | YHR192W | 1 | unassigned     | na      | 278 |
| YHR193C | EGD2    | 1 | pfam           | PF01849 | 114 |
| YHR193C | EGD2    | 2 | pfam           | PF00627 | 60  |
| YHR194W | MDM31   | 1 | unassigned     | na      | 579 |
| YHR195W | NVJ1    | 1 | unassigned     | na      | 321 |
| YHR196W | UTP9    | 1 | fold_recogniti | 1tbgA   | 369 |
| YHR196W | UTP9    | 2 | fold_recogniti | 1erjC   | 74  |
| YHR196W | UTP9    | 3 | unassigned     | na      | 132 |
| YHR197W | RIX1    | 1 | unassigned     | na      | 763 |
| YHR198C | FMP22   | 1 | unassigned     | na      | 86  |
| YHR198C | FMP22   | 2 | msa            | na      | 235 |
| YHR199C | FMP34   | 1 | unassigned     | na      | 93  |
| YHR199C | FMP34   | 2 | msa            | na      | 217 |
| YHR200W | RPN10   | 1 | fold_recogniti | 1dggA   | 197 |
| YHR200W | RPN10   | 2 | unassigned     | na      | 71  |
| YHR201C | PPX1    | 1 | psiblast       | 1k20A_  | 251 |
| YHR201C | PPX1    | 2 | psiblast       | 1k20A_  | 146 |
| YHR202W | YHR202W | 1 | psiblast       | 1ush__  | 362 |
| YHR202W | YHR202W | 2 | psiblast       | 1ush__  | 240 |
| YHR203C | RPS4B   | 1 | pfam           | PF01479 | 93  |
| YHR203C | RPS4B   | 2 | pfam           | PF00900 | 79  |
| YHR203C | RPS4B   | 3 | pfam           | PF00467 | 89  |
| YHR204W | MNL1    | 1 | psiblast       | 1fmiA_  | 417 |
| YHR204W | MNL1    | 2 | psiblast       | 1fmiA_  | 154 |
| YHR204W | MNL1    | 3 | unassigned     | na      | 225 |
| YHR205W | SCH9    | 1 | unassigned     | na      | 140 |
| YHR205W | SCH9    | 2 | psiblast       | 1tbn__  | 79  |
| YHR205W | SCH9    | 3 | psiblast       | 1dsyA_  | 133 |
| YHR205W | SCH9    | 4 | psiblast       | 1cdkA_  | 270 |
| YHR205W | SCH9    | 5 | psiblast       | 1cdkA_  | 128 |
| YHR205W | SCH9    | 6 | unassigned     | na      | 74  |
| YHR206W | SKN7    | 1 | unassigned     | na      | 67  |
| YHR206W | SKN7    | 2 | psiblast       | 1hks__  | 134 |
| YHR206W | SKN7    | 3 | msa            | na      | 168 |
| YHR206W | SKN7    | 4 | psiblast       | 1kgsA_  | 131 |
| YHR206W | SKN7    | 5 | psiblast       | 1kgsA_  | 122 |
| YHR207C | SET5    | 1 | unassigned     | na      | 89  |
| YHR207C | SET5    | 2 | msa            | na      | 123 |
| YHR207C | SET5    | 3 | unassigned     | na      | 70  |
| YHR207C | SET5    | 4 | fold_recogniti | 1mvhA   | 164 |
| YHR207C | SET5    | 5 | unassigned     | na      | 80  |
| YHR208W | BAT1    | 1 | psiblast       | 1ekfA_  | 212 |
| YHR208W | BAT1    | 2 | psiblast       | 1ekfA_  | 181 |

|           |           |    |                |         |     |
|-----------|-----------|----|----------------|---------|-----|
| YHR209W   | YHR209W   | 1  | psiblast       | 1kp9A_  | 198 |
| YHR209W   | YHR209W   | 2  | psiblast       | 1kp9A_  | 98  |
| YHR210C   | YHR210C   | 1  | psiblast       | 1l7jA_  | 341 |
| YHR211W   | FLO5      | 1  | msa            | na      | 250 |
| YHR211W   | FLO5      | 2  | pfam           | PF00624 | 66  |
| YHR211W   | FLO5      | 3  | pfam           | PF00624 | 45  |
| YHR211W   | FLO5      | 4  | pfam           | PF00624 | 45  |
| YHR211W   | FLO5      | 5  | pfam           | PF00624 | 45  |
| YHR211W   | FLO5      | 6  | pfam           | PF00624 | 45  |
| YHR211W   | FLO5      | 7  | pfam           | PF00624 | 45  |
| YHR211W   | FLO5      | 8  | pfam           | PF00624 | 45  |
| YHR211W   | FLO5      | 9  | pfam           | PF00624 | 60  |
| YHR211W   | FLO5      | 10 | msa            | na      | 429 |
| YHR214W-A | YHR214W-A | 1  | unassigned     | na      | 161 |
| YHR215W   | PHO12     | 1  | psiblast       | 1qfxA_  | 169 |
| YHR215W   | PHO12     | 2  | psiblast       | 1qfxA_  | 298 |
| YHR216W   | IMD2      | 1  | psiblast       | 1b3oA_  | 523 |
| YHR217C   | YHR217C   | 1  | fold_recogniti | 1k83A   | 153 |
| YHR218W   | YHR218W   | 1  | msa            | na      | 173 |
| YHR218W   | YHR218W   | 2  | unassigned     | na      | 107 |
| YHR218W   | YHR218W   | 3  | pfam           | PF00270 | 271 |
| YHR218W   | YHR218W   | 4  | unassigned     | na      | 52  |
| YHR219W   | YHR219W   | 1  | fold_recogniti | 1m2vB   | 375 |
| YHR219W   | YHR219W   | 2  | fold_recogniti | 1itwA   | 249 |
| YIL001W   | YIL001W   | 1  | psiblast       | 1myo__  | 94  |
| YIL001W   | YIL001W   | 2  | msa            | na      | 123 |
| YIL001W   | YIL001W   | 3  | psiblast       | 1buoA_  | 174 |
| YIL001W   | YIL001W   | 4  | msa            | na      | 122 |
| YIL002C   | INP51     | 1  | pfam           | PF02383 | 408 |
| YIL002C   | INP51     | 2  | unassigned     | na      | 88  |
| YIL002C   | INP51     | 3  | psiblast       | 1i9yA_  | 383 |
| YIL002C   | INP51     | 4  | unassigned     | na      | 67  |
| YIL003W   | CFD1      | 1  | psiblast       | 1g3qA_  | 293 |
| YIL004C   | BET1      | 1  | psiblast       | 1dn1B_  | 59  |
| YIL004C   | BET1      | 2  | psiblast       | 1dn1B_  | 83  |
| YIL005W   | EPS1      | 1  | psiblast       | 1mek__  | 165 |
| YIL005W   | EPS1      | 2  | psiblast       | 1a8y__  | 235 |
| YIL005W   | EPS1      | 3  | psiblast       | 1jfuA_  | 197 |
| YIL005W   | EPS1      | 4  | unassigned     | na      | 104 |
| YIL006W   | YIL006W   | 1  | unassigned     | na      | 72  |
| YIL006W   | YIL006W   | 2  | fold_recogniti | 1is2A   | 301 |
| YIL007C   | NAS2      | 1  | psiblast       | 1ky9A_  | 220 |
| YIL008W   | URM1      | 1  | unassigned     | na      | 99  |
| YIL009C-A | EST3      | 1  | unassigned     | na      | 181 |
| YIL009W   | FAA3      | 1  | psiblast       | 1ba3__  | 360 |
| YIL009W   | FAA3      | 2  | psiblast       | 1ba3__  | 334 |
| YIL010W   | DOT5      | 1  | psiblast       | 1qq2A_  | 215 |
| YIL011W   | TIR3      | 1  | pfam           | PF00660 | 110 |

|           |           |   |                |         |     |
|-----------|-----------|---|----------------|---------|-----|
| YIL011W   | TIR3      | 2 | psiblast       | 1deqA_  | 159 |
| YIL012W   | YIL012W   | 1 | unassigned     | na      | 130 |
| YIL013C   | PDR11     | 1 | psiblast       | 1l2tA_  | 294 |
| YIL013C   | PDR11     | 2 | unassigned     | na      | 66  |
| YIL013C   | PDR11     | 3 | msa            | na      | 224 |
| YIL013C   | PDR11     | 4 | unassigned     | na      | 144 |
| YIL013C   | PDR11     | 5 | psiblast       | 1g291_  | 327 |
| YIL013C   | PDR11     | 6 | msa            | na      | 261 |
| YIL013C   | PDR11     | 7 | unassigned     | na      | 95  |
| YIL014C-A | YIL014C-A | 1 | unassigned     | na      | 104 |
| YIL014W   | MNT3      | 1 | unassigned     | na      | 220 |
| YIL014W   | MNT3      | 2 | fold_recogniti | 1ga8A   | 164 |
| YIL014W   | MNT3      | 3 | unassigned     | na      | 246 |
| YIL015W   | BAR1      | 1 | psiblast       | 1ypsA_  | 205 |
| YIL015W   | BAR1      | 2 | psiblast       | 1ypsA_  | 125 |
| YIL015W   | BAR1      | 3 | psiblast       | 1ypsA_  | 135 |
| YIL015W   | BAR1      | 4 | unassigned     | na      | 122 |
| YIL016W   | SNL1      | 1 | unassigned     | na      | 66  |
| YIL016W   | SNL1      | 2 | pfam           | PF02179 | 93  |
| YIL017C   | VID28     | 1 | unassigned     | na      | 340 |
| YIL017C   | VID28     | 2 | psiblast       | 1ibrB_  | 163 |
| YIL017C   | VID28     | 3 | psiblast       | 1ejll_  | 112 |
| YIL017C   | VID28     | 4 | psiblast       | 1ejll_  | 53  |
| YIL017C   | VID28     | 5 | psiblast       | 1ejll_  | 157 |
| YIL017C   | VID28     | 6 | unassigned     | na      | 96  |
| YIL019W   | FAF1      | 1 | unassigned     | na      | 346 |
| YIL020C   | HIS6      | 1 | psiblast       | 1gpwA_  | 261 |
| YIL021W   | RPB3      | 1 | psiblast       | 1k83C_  | 274 |
| YIL021W   | RPB3      | 2 | psiblast       | 1k83C_  | 44  |
| YIL022W   | TIM44     | 1 | unassigned     | na      | 246 |
| YIL022W   | TIM44     | 2 | msa            | na      | 185 |
| YIL023C   | YIL023C   | 1 | msa            | na      | 169 |
| YIL023C   | YIL023C   | 2 | pfam           | PF02535 | 177 |
| YIL024C   | YIL024C   | 1 | unassigned     | na      | 189 |
| YIL025C   | YIL025C   | 1 | unassigned     | na      | 124 |
| YIL026C   | IRR1      | 1 | msa            | na      | 162 |
| YIL026C   | IRR1      | 2 | pfam           | PF03365 | 988 |
| YIL027C   | KRE27     | 1 | unassigned     | na      | 141 |
| YIL028W   | YIL028W   | 1 | unassigned     | na      | 132 |
| YIL029C   | YIL029C   | 1 | unassigned     | na      | 142 |
| YIL030C   | SSM4      | 1 | msa            | na      | 164 |
| YIL030C   | SSM4      | 2 | unassigned     | na      | 441 |
| YIL030C   | SSM4      | 3 | msa            | na      | 232 |
| YIL030C   | SSM4      | 4 | unassigned     | na      | 482 |
| YIL031W   | ULP2      | 1 | unassigned     | na      | 401 |
| YIL031W   | ULP2      | 2 | psiblast       | 1euvA_  | 329 |
| YIL031W   | ULP2      | 3 | unassigned     | na      | 304 |
| YIL032C   | YIL032C   | 1 | unassigned     | na      | 118 |

|         |         |   |                |         |     |
|---------|---------|---|----------------|---------|-----|
| YIL033C | BCY1    | 1 | psiblast       | 2apk__  | 416 |
| YIL034C | CAP2    | 1 | pfam           | PF01115 | 287 |
| YIL035C | CKA1    | 1 | psiblast       | 1jwhA_  | 164 |
| YIL035C | CKA1    | 2 | psiblast       | 1jwhA_  | 147 |
| YIL035C | CKA1    | 3 | psiblast       | 1jwhA_  | 61  |
| YIL036W | CST6    | 1 | msa            | na      | 300 |
| YIL036W | CST6    | 2 | unassigned     | na      | 79  |
| YIL036W | CST6    | 3 | psiblast       | 1io4A_  | 125 |
| YIL036W | CST6    | 4 | unassigned     | na      | 83  |
| YIL037C | PRM2    | 1 | unassigned     | na      | 99  |
| YIL037C | PRM2    | 2 | fold_recogniti | 1I9uD   | 481 |
| YIL037C | PRM2    | 3 | unassigned     | na      | 76  |
| YIL038C | NOT3    | 1 | psiblast       | 1gk4A_  | 107 |
| YIL038C | NOT3    | 2 | unassigned     | na      | 151 |
| YIL038C | NOT3    | 3 | fold_recogniti | 1deqA   | 114 |
| YIL038C | NOT3    | 4 | fold_recogniti | 1ei3A   | 315 |
| YIL038C | NOT3    | 5 | msa            | na      | 149 |
| YIL039W | YIL039W | 1 | unassigned     | na      | 175 |
| YIL039W | YIL039W | 2 | psiblast       | 1qfcA_  | 298 |
| YIL040W | APQ12   | 1 | unassigned     | na      | 138 |
| YIL041W | GVP36   | 1 | unassigned     | na      | 113 |
| YIL041W | GVP36   | 2 | fold_recogniti | 1i49A   | 213 |
| YIL042C | YIL042C | 1 | psiblast       | 1gkxA_  | 210 |
| YIL042C | YIL042C | 2 | psiblast       | 1gkxA_  | 184 |
| YIL043C | CBR1    | 1 | psiblast       | 2cjn__  | 72  |
| YIL043C | CBR1    | 2 | psiblast       | 1cnf__  | 102 |
| YIL043C | CBR1    | 3 | psiblast       | 1cnf__  | 148 |
| YIL044C | AGE2    | 1 | psiblast       | 1dcqA_  | 130 |
| YIL044C | AGE2    | 2 | msa            | na      | 168 |
| YIL045W | PIG2    | 1 | unassigned     | na      | 354 |
| YIL045W | PIG2    | 2 | pfam           | PF03370 | 184 |
| YIL046W | MET30   | 1 | unassigned     | na      | 103 |
| YIL046W | MET30   | 2 | psiblast       | 1erjA_  | 390 |
| YIL046W | MET30   | 3 | psiblast       | 1gxrA_  | 147 |
| YIL047C | SYG1    | 1 | psiblast       | 1i84S_  | 434 |
| YIL047C | SYG1    | 2 | msa            | na      | 400 |
| YIL047C | SYG1    | 3 | unassigned     | na      | 68  |
| YIL048W | NEO1    | 1 | unassigned     | na      | 114 |
| YIL048W | NEO1    | 2 | psiblast       | 1eulA_  | 166 |
| YIL048W | NEO1    | 3 | psiblast       | 1eulA_  | 399 |
| YIL048W | NEO1    | 4 | psiblast       | 1eulA_  | 231 |
| YIL048W | NEO1    | 5 | psiblast       | 1eulA_  | 241 |
| YIL049W | DFG10   | 1 | msa            | na      | 63  |
| YIL049W | DFG10   | 2 | pfam           | PF02544 | 190 |
| YIL050W | PCL7    | 1 | msa            | na      | 285 |
| YIL051C | MMF1    | 1 | psiblast       | 1jd1A_  | 145 |
| YIL052C | RPL34B  | 1 | pfam           | PF01199 | 121 |
| YIL053W | RHR2    | 1 | psiblast       | 1f5sA_  | 205 |

|           |           |   |                |         |     |
|-----------|-----------|---|----------------|---------|-----|
| YIL053W   | RHR2      | 2 | psiblast       | 1f5sA_  | 66  |
| YIL054W   | YIL054W   | 1 | unassigned     | na      | 105 |
| YIL055C   | YIL055C   | 1 | psiblast       | 1f6wA_  | 155 |
| YIL055C   | YIL055C   | 2 | fold_recogniti | 1deqA   | 248 |
| YIL055C   | YIL055C   | 3 | unassigned     | na      | 224 |
| YIL056W   | YIL056W   | 1 | unassigned     | na      | 227 |
| YIL056W   | YIL056W   | 2 | fold_recogniti | 1jfzA   | 172 |
| YIL056W   | YIL056W   | 3 | unassigned     | na      | 241 |
| YIL057C   | YIL057C   | 1 | unassigned     | na      | 164 |
| YIL058W   | YIL058W   | 1 | unassigned     | na      | 94  |
| YIL059C   | YIL059C   | 1 | unassigned     | na      | 121 |
| YIL060W   | YIL060W   | 1 | unassigned     | na      | 144 |
| YIL061C   | SNP1      | 1 | psiblast       | 2up1A_  | 90  |
| YIL061C   | SNP1      | 2 | psiblast       | 2up1A_  | 97  |
| YIL061C   | SNP1      | 3 | psiblast       | 1fxIA_  | 113 |
| YIL062C   | ARC15     | 1 | psiblast       | 1k8kG_  | 80  |
| YIL062C   | ARC15     | 2 | psiblast       | 1k8kG_  | 74  |
| YIL063C   | YRB2      | 1 | fold_recogniti | 1l8mA   | 113 |
| YIL063C   | YRB2      | 2 | fold_recogniti | 1l8mA   | 76  |
| YIL063C   | YRB2      | 3 | psiblast       | 1rrpB_  | 138 |
| YIL064W   | YIL064W   | 1 | psiblast       | 1kpiA_  | 257 |
| YIL065C   | FIS1      | 1 | unassigned     | na      | 155 |
| YIL066C   | RNR3      | 1 | psiblast       | 2r1rA_  | 217 |
| YIL066C   | RNR3      | 2 | psiblast       | 2r1rA_  | 604 |
| YIL066C   | RNR3      | 3 | unassigned     | na      | 64  |
| YIL066W-A | YIL066W-A | 1 | unassigned     | na      | 147 |
| YIL067C   | YIL067C   | 1 | unassigned     | na      | 173 |
| YIL067C   | YIL067C   | 2 | fold_recogniti | 1jbiA   | 131 |
| YIL067C   | YIL067C   | 3 | unassigned     | na      | 374 |
| YIL068C   | SEC6      | 1 | fold_recogniti | 1qgkA   | 285 |
| YIL068C   | SEC6      | 2 | fold_recogniti | 1qgkA   | 140 |
| YIL068C   | SEC6      | 3 | fold_recogniti | 1qgkA   | 121 |
| YIL068C   | SEC6      | 4 | fold_recogniti | 1qgkA   | 259 |
| YIL068W-A | YIL068W-A | 1 | unassigned     | na      | 127 |
| YIL070C   | MAM33     | 1 | psiblast       | 1p32A_  | 266 |
| YIL071C   | PCI8      | 1 | unassigned     | na      | 298 |
| YIL071C   | PCI8      | 2 | pfam           | PF01399 | 146 |
| YIL071W-A | YIL071W-A | 1 | unassigned     | na      | 158 |
| YIL072W   | HOP1      | 1 | psiblast       | 1klqA_  | 297 |
| YIL072W   | HOP1      | 2 | unassigned     | na      | 65  |
| YIL072W   | HOP1      | 3 | unassigned     | na      | 243 |
| YIL073C   | SPO22     | 1 | unassigned     | na      | 127 |
| YIL073C   | SPO22     | 2 | fold_recogniti | 1n1bA   | 253 |
| YIL073C   | SPO22     | 3 | fold_recogniti | 1n1bA   | 62  |
| YIL073C   | SPO22     | 4 | fold_recogniti | 1n1bA   | 124 |
| YIL073C   | SPO22     | 5 | fold_recogniti | 1hz4A   | 244 |
| YIL073C   | SPO22     | 6 | unassigned     | na      | 76  |
| YIL074C   | SER33     | 1 | psiblast       | 1psdA_  | 174 |



|         |         |   |                |         |     |
|---------|---------|---|----------------|---------|-----|
| YIL074C | SER33   | 2 | psiblast       | 1psdA_  | 295 |
| YIL075C | RPN2    | 1 | fold_recogniti | 1b3uA   | 148 |
| YIL075C | RPN2    | 2 | fold_recogniti | 1b3uA   | 87  |
| YIL075C | RPN2    | 3 | fold_recogniti | 1b3uA   | 125 |
| YIL075C | RPN2    | 4 | psiblast       | 1b3uA_  | 200 |
| YIL075C | RPN2    | 5 | psiblast       | 1b3uA_  | 161 |
| YIL075C | RPN2    | 6 | psiblast       | 1jmmA_  | 80  |
| YIL075C | RPN2    | 7 | msa            | na      | 144 |
| YIL076W | SEC28   | 1 | unassigned     | na      | 114 |
| YIL076W | SEC28   | 2 | fold_recogniti | 1hh8A   | 133 |
| YIL076W | SEC28   | 3 | fold_recogniti | 1hh8A   | 48  |
| YIL076W | SEC28   | 4 | fold_recogniti | 1hh8A   | 64  |
| YIL077C | YIL077C | 1 | unassigned     | na      | 320 |
| YIL078W | THS1    | 1 | msa            | na      | 68  |
| YIL078W | THS1    | 2 | psiblast       | 1qf6A_  | 71  |
| YIL078W | THS1    | 3 | psiblast       | 1qf6A_  | 183 |
| YIL078W | THS1    | 4 | psiblast       | 1qf6A_  | 298 |
| YIL078W | THS1    | 5 | psiblast       | 1qf6A_  | 114 |
| YIL079C | AIR1    | 1 | psiblast       | 1baj__  | 99  |
| YIL079C | AIR1    | 2 | psiblast       | 1aaf__  | 69  |
| YIL079C | AIR1    | 3 | unassigned     | na      | 65  |
| YIL079C | AIR1    | 4 | msa            | na      | 127 |
| YIL083C | YIL083C | 1 | psiblast       | 1e20A_  | 80  |
| YIL083C | YIL083C | 2 | msa            | na      | 285 |
| YIL084C | SDS3    | 1 | psiblast       | 1i84S_  | 197 |
| YIL084C | SDS3    | 2 | unassigned     | na      | 130 |
| YIL085C | KTR7    | 1 | pfam           | PF01793 | 432 |
| YIL085C | KTR7    | 2 | unassigned     | na      | 85  |
| YIL086C | YIL086C | 1 | unassigned     | na      | 102 |
| YIL087C | YIL087C | 1 | unassigned     | na      | 157 |
| YIL088C | AVT7    | 1 | pfam           | PF01490 | 490 |
| YIL089W | YIL089W | 1 | unassigned     | na      | 205 |
| YIL090W | YIL090W | 1 | unassigned     | na      | 491 |
| YIL091C | YIL091C | 1 | psiblast       | 1i84S_  | 219 |
| YIL091C | YIL091C | 2 | fold_recogniti | 1hv8A   | 502 |
| YIL092W | YIL092W | 1 | unassigned     | na      | 633 |
| YIL093C | RSM25   | 1 | unassigned     | na      | 264 |
| YIL094C | LYS12   | 1 | psiblast       | 1osjA_  | 371 |
| YIL095W | PRK1    | 1 | psiblast       | 2phkA_  | 91  |
| YIL095W | PRK1    | 2 | psiblast       | 2phkA_  | 260 |
| YIL095W | PRK1    | 3 | unassigned     | na      | 459 |
| YIL096C | YIL096C | 1 | unassigned     | na      | 63  |
| YIL096C | YIL096C | 2 | msa            | na      | 273 |
| YIL097W | FYV10   | 1 | unassigned     | na      | 116 |
| YIL097W | FYV10   | 2 | msa            | na      | 256 |
| YIL097W | FYV10   | 3 | unassigned     | na      | 55  |
| YIL097W | FYV10   | 4 | msa            | na      | 89  |
| YIL098C | FMC1    | 1 | unassigned     | na      | 155 |

|           |           |   |                |         |     |
|-----------|-----------|---|----------------|---------|-----|
| YIL099W   | SGA1      | 1 | unassigned     | na      | 71  |
| YIL099W   | SGA1      | 2 | psiblast       | 1ayx__  | 257 |
| YIL099W   | SGA1      | 3 | psiblast       | 1ayx__  | 221 |
| YIL100C-A | YIL100C-A | 1 | unassigned     | na      | 112 |
| YIL100W   | YIL100W   | 1 | unassigned     | na      | 117 |
| YIL101C   | XBP1      | 1 | fold_recogniti | 1ruxA   | 305 |
| YIL101C   | XBP1      | 2 | fold_recogniti | 1ruxA   | 342 |
| YIL102C   | YIL102C   | 1 | unassigned     | na      | 101 |
| YIL103W   | YIL103W   | 1 | unassigned     | na      | 162 |
| YIL103W   | YIL103W   | 2 | fold_recogniti | 1jzxK   | 208 |
| YIL103W   | YIL103W   | 3 | fold_recogniti | 1jzxK   | 55  |
| YIL104C   | SHQ1      | 1 | unassigned     | na      | 273 |
| YIL104C   | SHQ1      | 2 | msa            | na      | 234 |
| YIL105C   | LIT2      | 1 | unassigned     | na      | 76  |
| YIL105C   | LIT2      | 2 | fold_recogniti | 1itwA   | 178 |
| YIL105C   | LIT2      | 3 | fold_recogniti | 1itwA   | 155 |
| YIL105C   | LIT2      | 4 | fold_recogniti | 1i5pA   | 58  |
| YIL105C   | LIT2      | 5 | psiblast       | 1fhwA_  | 125 |
| YIL105C   | LIT2      | 6 | msa            | na      | 94  |
| YIL106W   | MOB1      | 1 | unassigned     | na      | 91  |
| YIL106W   | MOB1      | 2 | pfam           | PF03637 | 223 |
| YIL107C   | PFK26     | 1 | msa            | na      | 91  |
| YIL107C   | PFK26     | 2 | psiblast       | 1bif__  | 303 |
| YIL107C   | PFK26     | 3 | psiblast       | 1bif__  | 267 |
| YIL107C   | PFK26     | 4 | unassigned     | na      | 166 |
| YIL108W   | YIL108W   | 1 | unassigned     | na      | 204 |
| YIL108W   | YIL108W   | 2 | msa            | na      | 492 |
| YIL109C   | SEC24     | 1 | fold_recogniti | 1ldvA   | 279 |
| YIL109C   | SEC24     | 2 | unassigned     | na      | 60  |
| YIL109C   | SEC24     | 3 | msa            | na      | 352 |
| YIL109C   | SEC24     | 4 | unassigned     | na      | 87  |
| YIL109C   | SEC24     | 5 | psiblast       | 1svq__  | 66  |
| YIL109C   | SEC24     | 6 | fold_recogniti | 1m2vB   | 82  |
| YIL110W   | YIL110W   | 1 | unassigned     | na      | 120 |
| YIL110W   | YIL110W   | 2 | psiblast       | 1f3IA_  | 112 |
| YIL110W   | YIL110W   | 3 | unassigned     | na      | 145 |
| YIL111W   | COX5B     | 1 | psiblast       | 1occD_  | 151 |
| YIL112W   | HOS4      | 1 | msa            | na      | 202 |
| YIL112W   | HOS4      | 2 | psiblast       | 1ihbA_  | 99  |
| YIL112W   | HOS4      | 3 | psiblast       | 1ihbA_  | 87  |
| YIL112W   | HOS4      | 4 | psiblast       | 1awcB_  | 93  |
| YIL112W   | HOS4      | 5 | msa            | na      | 76  |
| YIL112W   | HOS4      | 6 | psiblast       | 1myo__  | 68  |
| YIL112W   | HOS4      | 7 | psiblast       | 1myo__  | 53  |
| YIL112W   | HOS4      | 8 | fold_recogniti | 1ldvA   | 261 |
| YIL112W   | HOS4      | 9 | unassigned     | na      | 144 |
| YIL113W   | SDP1      | 1 | psiblast       | 1mkp__  | 209 |
| YIL114C   | POR2      | 1 | pfam           | PF01459 | 281 |

|         |         |                  |         |     |
|---------|---------|------------------|---------|-----|
| YIL115C | NUP159  | 1 unassigned     | na      | 132 |
| YIL115C | NUP159  | 2 msa            | na      | 477 |
| YIL115C | NUP159  | 3 msa            | na      | 326 |
| YIL115C | NUP159  | 4 msa            | na      | 441 |
| YIL115C | NUP159  | 5 unassigned     | na      | 84  |
| YIL116W | HIS5    | 1 psiblast       | 1gewA_  | 286 |
| YIL116W | HIS5    | 2 psiblast       | 1gewA_  | 99  |
| YIL117C | PRM5    | 1 unassigned     | na      | 318 |
| YIL118W | RHO3    | 1 psiblast       | 1lb1B_  | 231 |
| YIL119C | RPI1    | 1 unassigned     | na      | 407 |
| YIL120W | QDR1    | 1 msa            | na      | 68  |
| YIL120W | QDR1    | 2 psiblast       | 1lviA_  | 410 |
| YIL120W | QDR1    | 3 unassigned     | na      | 85  |
| YIL121W | QDR2    | 1 psiblast       | 1lviA_  | 469 |
| YIL121W | QDR2    | 2 unassigned     | na      | 73  |
| YIL122W | POG1    | 1 unassigned     | na      | 351 |
| YIL123W | SIM1    | 1 fold_recogniti | 1m2vB   | 199 |
| YIL123W | SIM1    | 2 psiblast       | 1deqA_  | 140 |
| YIL123W | SIM1    | 3 pfam           | PF03856 | 136 |
| YIL124W | AYR1    | 1 psiblast       | 1ae1A_  | 297 |
| YIL125W | KGD1    | 1 msa            | na      | 148 |
| YIL125W | KGD1    | 2 msa            | na      | 127 |
| YIL125W | KGD1    | 3 psiblast       | 1gpuA_  | 267 |
| YIL125W | KGD1    | 4 psiblast       | 1gpuA_  | 56  |
| YIL125W | KGD1    | 5 psiblast       | 1gpuA_  | 104 |
| YIL125W | KGD1    | 6 psiblast       | 1ik6A_  | 179 |
| YIL125W | KGD1    | 7 psiblast       | 1ik6A_  | 133 |
| YIL126W | STH1    | 1 unassigned     | na      | 233 |
| YIL126W | STH1    | 2 psiblast       | 1gm5A_  | 109 |
| YIL126W | STH1    | 3 psiblast       | 1gm5A_  | 307 |
| YIL126W | STH1    | 4 unassigned     | na      | 58  |
| YIL126W | STH1    | 5 psiblast       | 1hv8A_  | 212 |
| YIL126W | STH1    | 6 msa            | na      | 227 |
| YIL126W | STH1    | 7 unassigned     | na      | 81  |
| YIL126W | STH1    | 8 psiblast       | 1e6iA_  | 132 |
| YIL127C | YIL127C | 1 unassigned     | na      | 206 |
| YIL128W | MET18   | 1 msa            | na      | 207 |
| YIL128W | MET18   | 2 unassigned     | na      | 251 |
| YIL128W | MET18   | 3 msa            | na      | 391 |
| YIL128W | MET18   | 4 unassigned     | na      | 183 |
| YIL129C | TAO3    | 1 unassigned     | na      | 202 |
| YIL129C | TAO3    | 2 msa            | na      | 133 |
| YIL129C | TAO3    | 3 msa            | na      | 818 |
| YIL129C | TAO3    | 4 unassigned     | na      | 304 |
| YIL129C | TAO3    | 5 msa            | na      | 538 |
| YIL129C | TAO3    | 6 msa            | na      | 228 |
| YIL129C | TAO3    | 7 unassigned     | na      | 153 |
| YIL130W | YIL130W | 1 psiblast       | 1d66A_  | 95  |

|         |         |                  |         |     |
|---------|---------|------------------|---------|-----|
| YIL130W | YIL130W | 2 unassigned     | na      | 97  |
| YIL130W | YIL130W | 3 msa            | na      | 243 |
| YIL130W | YIL130W | 4 unassigned     | na      | 347 |
| YIL130W | YIL130W | 5 msa            | na      | 182 |
| YIL131C | FKH1    | 1 unassigned     | na      | 74  |
| YIL131C | FKH1    | 2 pfam           | PF00498 | 115 |
| YIL131C | FKH1    | 3 msa            | na      | 105 |
| YIL131C | FKH1    | 4 psiblast       | 1d5vA_  | 120 |
| YIL131C | FKH1    | 5 unassigned     | na      | 70  |
| YIL132C | CSM2    | 1 unassigned     | na      | 213 |
| YIL133C | RPL16A  | 1 psiblast       | 1k5yM_  | 199 |
| YIL134W | FLX1    | 1 pfam           | PF00153 | 115 |
| YIL134W | FLX1    | 2 pfam           | PF00153 | 105 |
| YIL134W | FLX1    | 3 pfam           | PF00153 | 91  |
| YIL135C | VHS2    | 1 msa            | na      | 281 |
| YIL135C | VHS2    | 2 unassigned     | na      | 155 |
| YIL136W | OM45    | 1 unassigned     | na      | 393 |
| YIL137C | YIL137C | 1 psiblast       | 1hs6A_  | 227 |
| YIL137C | YIL137C | 2 psiblast       | 1hs6A_  | 101 |
| YIL137C | YIL137C | 3 psiblast       | 1hs6A_  | 194 |
| YIL137C | YIL137C | 4 unassigned     | na      | 59  |
| YIL137C | YIL137C | 5 msa            | na      | 258 |
| YIL137C | YIL137C | 6 unassigned     | na      | 107 |
| YIL138C | TPM2    | 1 psiblast       | 2tmaA_  | 91  |
| YIL138C | TPM2    | 2 psiblast       | 2tmaA_  | 70  |
| YIL139C | REV7    | 1 pfam           | PF02301 | 245 |
| YIL140W | AXL2    | 1 psiblast       | 1cwvA_  | 148 |
| YIL140W | AXL2    | 2 psiblast       | 1f00I_  | 94  |
| YIL140W | AXL2    | 3 psiblast       | 1f00I_  | 84  |
| YIL140W | AXL2    | 4 psiblast       | 1f00I_  | 116 |
| YIL140W | AXL2    | 5 unassigned     | na      | 381 |
| YIL141W | YIL141W | 1 unassigned     | na      | 129 |
| YIL142W | CCT2    | 1 psiblast       | 1a6dA_  | 411 |
| YIL142W | CCT2    | 2 psiblast       | 1a6dA_  | 116 |
| YIL143C | SSL2    | 1 unassigned     | na      | 297 |
| YIL143C | SSL2    | 2 psiblast       | 1hv8A_  | 273 |
| YIL143C | SSL2    | 3 psiblast       | 1hv8A_  | 147 |
| YIL143C | SSL2    | 4 psiblast       | 1d2mA_  | 126 |
| YIL144W | TID3    | 1 pfam           | PF03801 | 181 |
| YIL144W | TID3    | 2 psiblast       | 1i84S_  | 317 |
| YIL144W | TID3    | 3 psiblast       | 2tmaA_  | 87  |
| YIL144W | TID3    | 4 msa            | na      | 106 |
| YIL145C | PAN6    | 1 psiblast       | 1ihoA_  | 222 |
| YIL145C | PAN6    | 2 psiblast       | 1ihoA_  | 123 |
| YIL146C | ECM37   | 1 fold_recogniti | 1llwA   | 361 |
| YIL146C | ECM37   | 2 unassigned     | na      | 168 |
| YIL147C | SLN1    | 1 msa            | na      | 161 |
| YIL147C | SLN1    | 2 unassigned     | na      | 103 |

|           |           |   |                |         |     |
|-----------|-----------|---|----------------|---------|-----|
| YIL147C   | SLN1      | 3 | msa            | na      | 289 |
| YIL147C   | SLN1      | 4 | fold_recogniti | 1joyA   | 117 |
| YIL147C   | SLN1      | 5 | msa            | na      | 115 |
| YIL147C   | SLN1      | 6 | psiblast       | 1bxdA_  | 154 |
| YIL147C   | SLN1      | 7 | psiblast       | 1qkkA_  | 146 |
| YIL147C   | SLN1      | 8 | psiblast       | 1udrA_  | 135 |
| YIL148W   | RPL40A    | 1 | psiblast       | 1aarA_  | 76  |
| YIL148W   | RPL40A    | 2 | pfam           | PF01020 | 52  |
| YIL149C   | MLP2      | 1 | msa            | na      | 175 |
| YIL149C   | MLP2      | 2 | psiblast       | 1c1gA_  | 93  |
| YIL149C   | MLP2      | 3 | psiblast       | 1i84S_  | 424 |
| YIL149C   | MLP2      | 4 | unassigned     | na      | 53  |
| YIL149C   | MLP2      | 5 | msa            | na      | 347 |
| YIL149C   | MLP2      | 6 | unassigned     | na      | 77  |
| YIL149C   | MLP2      | 7 | msa            | na      | 434 |
| YIL149C   | MLP2      | 8 | unassigned     | na      | 76  |
| YIL150C   | MCM10     | 1 | msa            | na      | 364 |
| YIL150C   | MCM10     | 2 | unassigned     | na      | 95  |
| YIL150C   | MCM10     | 3 | msa            | na      | 112 |
| YIL151C   | YIL151C   | 1 | unassigned     | na      | 943 |
| YIL151C   | YIL151C   | 2 | msa            | na      | 175 |
| YIL152W   | YIL152W   | 1 | unassigned     | na      | 235 |
| YIL153W   | RRD1      | 1 | pfam           | PF03095 | 337 |
| YIL153W   | RRD1      | 2 | unassigned     | na      | 56  |
| YIL154C   | IMP2'     | 1 | unassigned     | na      | 181 |
| YIL154C   | IMP2'     | 2 | fold_recogniti | 1jmvA   | 165 |
| YIL155C   | GUT2      | 1 | psiblast       | 1el5A_  | 497 |
| YIL155C   | GUT2      | 2 | unassigned     | na      | 73  |
| YIL155C   | GUT2      | 3 | msa            | na      | 79  |
| YIL156W   | UBP7      | 1 | msa            | na      | 222 |
| YIL156W   | UBP7      | 2 | unassigned     | na      | 77  |
| YIL156W   | UBP7      | 3 | pfam           | PF00581 | 179 |
| YIL156W   | UBP7      | 4 | unassigned     | na      | 75  |
| YIL156W   | UBP7      | 5 | pfam           | PF00442 | 95  |
| YIL156W   | UBP7      | 6 | msa            | na      | 333 |
| YIL156W   | UBP7      | 7 | pfam           | PF00443 | 90  |
| YIL156W-A | YIL156W-A | 1 | unassigned     | na      | 133 |
| YIL157C   | FMP35     | 1 | unassigned     | na      | 197 |
| YIL158W   | YIL158W   | 1 | msa            | na      | 106 |
| YIL158W   | YIL158W   | 2 | unassigned     | na      | 98  |
| YIL159W   | BNR1      | 1 | msa            | na      | 162 |
| YIL159W   | BNR1      | 2 | fold_recogniti | 1jpwA   | 129 |
| YIL159W   | BNR1      | 3 | fold_recogniti | 1jpwA   | 102 |
| YIL159W   | BNR1      | 4 | fold_recogniti | 1jpwA   | 129 |
| YIL159W   | BNR1      | 5 | fold_recogniti | 1jpwA   | 81  |
| YIL159W   | BNR1      | 6 | psiblast       | 1dynA_  | 62  |
| YIL159W   | BNR1      | 7 | fold_recogniti | 1deqA   | 202 |
| YIL159W   | BNR1      | 8 | unassigned     | na      | 84  |

|           |           |    |                |         |     |
|-----------|-----------|----|----------------|---------|-----|
| YIL159W   | BNR1      | 9  | fold_recogniti | 1I9zH   | 102 |
| YIL159W   | BNR1      | 10 | fold_recogniti | 1I9zH   | 147 |
| YIL159W   | BNR1      | 11 | fold_recogniti | 1I9zH   | 123 |
| YIL159W   | BNR1      | 12 | unassigned     | na      | 52  |
| YIL160C   | POT1      | 1  | psiblast       | 1afwA_  | 417 |
| YIL161W   | YIL161W   | 1  | unassigned     | na      | 235 |
| YIL162W   | SUC2      | 1  | unassigned     | na      | 153 |
| YIL162W   | SUC2      | 2  | fold_recogniti | 1gyhA   | 338 |
| YIL162W   | SUC2      | 3  | msa            | na      | 169 |
| YIL163C   | YIL163C   | 1  | unassigned     | na      | 117 |
| YIL164C   | NIT1      | 1  | psiblast       | 1f89A_  | 199 |
| YIL165C   | YIL165C   | 1  | psiblast       | 1emsA_  | 119 |
| YIL166C   | YIL166C   | 1  | unassigned     | na      | 62  |
| YIL166C   | YIL166C   | 2  | psiblast       | 1ja5A_  | 405 |
| YIL166C   | YIL166C   | 3  | psiblast       | 1ja5A_  | 75  |
| YIL167W   | YIL167W   | 1  | psiblast       | 1tdj__  | 210 |
| YIL168W   | SDL1      | 1  | psiblast       | 1tdj__  | 127 |
| YIL169C   | YIL169C   | 1  | unassigned     | na      | 114 |
| YIL169C   | YIL169C   | 2  | fold_recogniti | 1qu7A   | 164 |
| YIL169C   | YIL169C   | 3  | unassigned     | na      | 66  |
| YIL169C   | YIL169C   | 4  | fold_recogniti | 1deqA   | 121 |
| YIL169C   | YIL169C   | 5  | fold_recogniti | 1ldvA   | 272 |
| YIL169C   | YIL169C   | 6  | msa            | na      | 258 |
| YIL170W   | HXT12     | 1  | psiblast       | 1ja5A_  | 360 |
| YIL170W   | HXT12     | 2  | psiblast       | 1ja5A_  | 97  |
| YIL171W   | HXT12     | 1  | unassigned     | na      | 109 |
| YIL171W-A | YIL171W-A | 1  | unassigned     | na      | 150 |
| YIL172C   | YIL172C   | 1  | psiblast       | 1uok__  | 302 |
| YIL172C   | YIL172C   | 2  | psiblast       | 1uok__  | 287 |
| YIL173W   | VTH1      | 1  | msa            | na      | 182 |
| YIL173W   | VTH1      | 2  | unassigned     | na      | 354 |
| YIL173W   | VTH1      | 3  | msa            | na      | 186 |
| YIL173W   | VTH1      | 4  | msa            | na      | 676 |
| YIL173W   | VTH1      | 5  | unassigned     | na      | 151 |
| YIL174W   | YIL174W   | 1  | unassigned     | na      | 75  |
| YIL176C   | YIL176C   | 1  | pfam           | PF00660 | 120 |
| YIL177C   | YIL177C   | 1  | msa            | na      | 238 |
| YIL177C   | YIL177C   | 2  | msa            | na      | 211 |
| YIL177C   | YIL177C   | 3  | unassigned     | na      | 108 |
| YIL177C   | YIL177C   | 4  | psiblast       | 1fuuA_  | 546 |
| YIL177C   | YIL177C   | 5  | fold_recogniti | 1m2vB   | 361 |
| YIL177C   | YIL177C   | 6  | unassigned     | na      | 294 |
| YIR001C   | SGN1      | 1  | psiblast       | 1ha1__  | 142 |
| YIR001C   | SGN1      | 2  | psiblast       | 1ha1__  | 108 |
| YIR002C   | MPH1      | 1  | psiblast       | 1qdeA_  | 286 |
| YIR002C   | MPH1      | 2  | psiblast       | 1hv8A_  | 200 |
| YIR002C   | MPH1      | 3  | psiblast       | 1hv8A_  | 148 |
| YIR002C   | MPH1      | 4  | psiblast       | 1d9xA_  | 103 |

|           |           |                   |        |     |
|-----------|-----------|-------------------|--------|-----|
| YIR002C   | MPH1      | 5 unassigned      | na     | 256 |
| YIR003W   | YIR003W   | 1 fold_recogniti  | 1l8mA  | 96  |
| YIR003W   | YIR003W   | 2 fold_recogniti  | 1l8mA  | 73  |
| YIR003W   | YIR003W   | 3 fold_recogniti  | 1l8mA  | 79  |
| YIR003W   | YIR003W   | 4 fold_recogniti  | 1l8mA  | 72  |
| YIR003W   | YIR003W   | 5 fold_recogniti  | 1jhnA  | 183 |
| YIR003W   | YIR003W   | 6 fold_recogniti  | 1m2vB  | 88  |
| YIR003W   | YIR003W   | 7 unassigned      | na     | 88  |
| YIR004W   | DJP1      | 1 psiblast        | 1xbl__ | 117 |
| YIR004W   | DJP1      | 2 psiblast        | 1exkA_ | 80  |
| YIR004W   | DJP1      | 3 psiblast        | 1c3gA_ | 128 |
| YIR004W   | DJP1      | 4 msa             | na     | 107 |
| YIR005W   | IST3      | 1 psiblast        | 1ha1__ | 148 |
| YIR006C   | PAN1      | 1 fold_recogniti  | 1deqA  | 235 |
| YIR006C   | PAN1      | 2 psiblast        | 1fi6A_ | 119 |
| YIR006C   | PAN1      | 3 fold_recogniti  | 1k83A  | 238 |
| YIR006C   | PAN1      | 4 psiblast        | 1c07A_ | 100 |
| YIR006C   | PAN1      | 5 fold_recogniti  | 1jv2B  | 326 |
| YIR006C   | PAN1      | 6 fold_recogniti  | 1jv2B  | 151 |
| YIR006C   | PAN1      | 7 fold_recogniti  | 1l8mA  | 85  |
| YIR006C   | PAN1      | 8 fold_recogniti  | 1l8mA  | 73  |
| YIR006C   | PAN1      | 9 fold_recogniti  | 1l8mA  | 80  |
| YIR006C   | PAN1      | 10 fold_recogniti | 1l8mA  | 73  |
| YIR007W   | YIR007W   | 1 unassigned      | na     | 69  |
| YIR007W   | YIR007W   | 2 psiblast        | 1edg__ | 98  |
| YIR007W   | YIR007W   | 3 unassigned      | na     | 597 |
| YIR008C   | PRI1      | 1 psiblast        | 1g71A_ | 98  |
| YIR008C   | PRI1      | 2 psiblast        | 1g71A_ | 197 |
| YIR008C   | PRI1      | 3 psiblast        | 1g71A_ | 114 |
| YIR009W   | MSL1      | 1 psiblast        | 1nrcA_ | 111 |
| YIR010W   | DSN1      | 1 unassigned      | na     | 77  |
| YIR010W   | DSN1      | 2 psiblast        | 1mmg__ | 95  |
| YIR010W   | DSN1      | 3 psiblast        | 1i84S_ | 178 |
| YIR010W   | DSN1      | 4 psiblast        | 1i84S_ | 226 |
| YIR011C   | STS1      | 1 unassigned      | na     | 319 |
| YIR012W   | SQT1      | 1 psiblast        | 1gxrA_ | 97  |
| YIR012W   | SQT1      | 2 psiblast        | 1gg2B_ | 334 |
| YIR013C   | GAT4      | 1 psiblast        | 2gatA_ | 121 |
| YIR014W   | YIR014W   | 1 unassigned      | na     | 276 |
| YIR015W   | RPR2      | 1 unassigned      | na     | 144 |
| YIR016W   | YIR016W   | 1 unassigned      | na     | 265 |
| YIR017C   | MET28     | 1 msa             | na     | 93  |
| YIR017C   | MET28     | 2 psiblast        | 1hjbA_ | 94  |
| YIR017W-A | YIR017W-A | 1 unassigned      | na     | 199 |
| YIR018W   | YAP5      | 1 psiblast        | 1hjbA_ | 193 |
| YIR018W   | YAP5      | 2 unassigned      | na     | 52  |
| YIR019C   | MUC1      | 1 msa             | na     | 407 |
| YIR019C   | MUC1      | 2 msa             | na     | 648 |

|           |           |   |                |         |     |
|-----------|-----------|---|----------------|---------|-----|
| YIR019C   | MUC1      | 3 | msa            | na      | 312 |
| YIR020C   | YIR020C   | 1 | unassigned     | na      | 100 |
| YIR020C-B | YIR020C-B | 1 | unassigned     | na      | 244 |
| YIR020W-A | YIR020W-A | 1 | unassigned     | na      | 80  |
| YIR021W   | MRS1      | 1 | unassigned     | na      | 69  |
| YIR021W   | MRS1      | 2 | psiblast       | 1kcfA_  | 149 |
| YIR021W   | MRS1      | 3 | unassigned     | na      | 145 |
| YIR022W   | SEC11     | 1 | psiblast       | 1b12A_  | 115 |
| YIR022W   | SEC11     | 2 | unassigned     | na      | 52  |
| YIR023C-A | YIR023C-A | 1 | unassigned     | na      | 107 |
| YIR023W   | DAL81     | 1 | msa            | na      | 123 |
| YIR023W   | DAL81     | 2 | psiblast       | 1pyiA_  | 172 |
| YIR023W   | DAL81     | 3 | msa            | na      | 193 |
| YIR023W   | DAL81     | 4 | unassigned     | na      | 256 |
| YIR023W   | DAL81     | 5 | fold_recogniti | 1ldvA   | 226 |
| YIR024C   | YIR024C   | 1 | unassigned     | na      | 216 |
| YIR025W   | MND2      | 1 | unassigned     | na      | 368 |
| YIR026C   | YVH1      | 1 | psiblast       | 1mkp__  | 70  |
| YIR026C   | YVH1      | 2 | psiblast       | 1larA_  | 180 |
| YIR026C   | YVH1      | 3 | unassigned     | na      | 114 |
| YIR027C   | DAL1      | 1 | psiblast       | 1gkrA_  | 460 |
| YIR028W   | DAL4      | 1 | unassigned     | na      | 97  |
| YIR028W   | DAL4      | 2 | pfam           | PF02133 | 484 |
| YIR028W   | DAL4      | 3 | unassigned     | na      | 54  |
| YIR029W   | DAL2      | 1 | pfam           | PF03561 | 185 |
| YIR029W   | DAL2      | 2 | pfam           | PF03561 | 158 |
| YIR030C   | DCG1      | 1 | psiblast       | 1b73A_  | 112 |
| YIR030C   | DCG1      | 2 | psiblast       | 1b73A_  | 132 |
| YIR031C   | DAL7      | 1 | fold_recogniti | 1d8cA   | 104 |
| YIR031C   | DAL7      | 2 | psiblast       | 1d8cA_  | 317 |
| YIR031C   | DAL7      | 3 | psiblast       | 1d8cA_  | 133 |
| YIR032C   | DAL3      | 1 | unassigned     | na      | 195 |
| YIR033W   | MGA2      | 1 | unassigned     | na      | 346 |
| YIR033W   | MGA2      | 2 | msa            | na      | 178 |
| YIR033W   | MGA2      | 3 | psiblast       | 1k1aA_  | 158 |
| YIR033W   | MGA2      | 4 | psiblast       | 1k1aA_  | 119 |
| YIR033W   | MGA2      | 5 | psiblast       | 1lnnA_  | 68  |
| YIR033W   | MGA2      | 6 | unassigned     | na      | 111 |
| YIR033W   | MGA2      | 7 | msa            | na      | 79  |
| YIR033W   | MGA2      | 8 | unassigned     | na      | 54  |
| YIR034C   | LYS1      | 1 | psiblast       | 1pjbA_  | 185 |
| YIR034C   | LYS1      | 2 | psiblast       | 1pjbA_  | 188 |
| YIR035C   | YIR035C   | 1 | psiblast       | 1ae1A_  | 254 |
| YIR036C   | YIR036C   | 1 | psiblast       | 2ae1__  | 263 |
| YIR037W   | HYR1      | 1 | psiblast       | 1gp1A_  | 163 |
| YIR038C   | GTT1      | 1 | psiblast       | 1byeA_  | 89  |
| YIR038C   | GTT1      | 2 | psiblast       | 1byeA_  | 145 |
| YIR039C   | YPS6      | 1 | psiblast       | 1ypsA_  | 146 |



|           |         |    |                |         |     |
|-----------|---------|----|----------------|---------|-----|
| YIR039C   | YPS6    | 2  | psiblast       | 1ypsA_  | 305 |
| YIR039C   | YPS6    | 3  | unassigned     | na      | 86  |
| YIR040C   | YIR040C | 1  | unassigned     | na      | 110 |
| YIR041W   | YIR041W | 1  | pfam           | PF00660 | 124 |
| YIR042C   | YIR042C | 1  | psiblast       | 1i12A_  | 236 |
| YIR043C   | YIR043C | 1  | unassigned     | na      | 64  |
| YIR043C   | YIR043C | 2  | pfam           | PF00674 | 166 |
| YIR044C   | YIR044C | 1  | unassigned     | na      | 61  |
| YJL001W   | PRE3    | 1  | psiblast       | 1rypH_  | 215 |
| YJL002C   | OST1    | 1  | msa            | na      | 109 |
| YJL002C   | OST1    | 2  | unassigned     | na      | 184 |
| YJL002C   | OST1    | 3  | msa            | na      | 183 |
| YJL003W   | COX16   | 1  | unassigned     | na      | 118 |
| YJL004C   | SYS1    | 1  | msa            | na      | 203 |
| YJL005W   | CYR1    | 1  | fold_recogniti | 1k83A   | 409 |
| YJL005W   | CYR1    | 2  | fold_recogniti | 1ldvA   | 144 |
| YJL005W   | CYR1    | 3  | psiblast       | 2bnh__  | 106 |
| YJL005W   | CYR1    | 4  | psiblast       | 2bnh__  | 60  |
| YJL005W   | CYR1    | 5  | psiblast       | 2bnh__  | 58  |
| YJL005W   | CYR1    | 6  | psiblast       | 2bnh__  | 170 |
| YJL005W   | CYR1    | 7  | psiblast       | 1k5dC_  | 83  |
| YJL005W   | CYR1    | 8  | psiblast       | 1j15A_  | 93  |
| YJL005W   | CYR1    | 9  | unassigned     | na      | 62  |
| YJL005W   | CYR1    | 10 | psiblast       | 1kooA_  | 115 |
| YJL005W   | CYR1    | 11 | unassigned     | na      | 52  |
| YJL005W   | CYR1    | 12 | psiblast       | 1a6q__  | 297 |
| YJL005W   | CYR1    | 13 | psiblast       | 1fx4A_  | 253 |
| YJL005W   | CYR1    | 14 | unassigned     | na      | 124 |
| YJL006C   | CTK2    | 1  | psiblast       | 1vin__  | 194 |
| YJL006C   | CTK2    | 2  | psiblast       | 1vin__  | 129 |
| YJL007C   | YJL007C | 1  | unassigned     | na      | 104 |
| YJL008C   | CCT8    | 1  | psiblast       | 1a6dA_  | 442 |
| YJL008C   | CCT8    | 2  | psiblast       | 1a6dA_  | 126 |
| YJL009W   | YJL009W | 1  | unassigned     | na      | 108 |
| YJL010C   | YJL010C | 1  | unassigned     | na      | 77  |
| YJL010C   | YJL010C | 2  | pfam           | PF00806 | 49  |
| YJL010C   | YJL010C | 3  | pfam           | PF00806 | 43  |
| YJL010C   | YJL010C | 4  | psiblast       | 1ib2A_  | 166 |
| YJL010C   | YJL010C | 5  | psiblast       | 1ib2A_  | 102 |
| YJL010C   | YJL010C | 6  | psiblast       | 1ib2A_  | 156 |
| YJL010C   | YJL010C | 7  | unassigned     | na      | 73  |
| YJL011C   | RPC17   | 1  | unassigned     | na      | 161 |
| YJL012C   | VTC4    | 1  | pfam           | PF03105 | 194 |
| YJL012C   | VTC4    | 2  | msa            | na      | 304 |
| YJL012C   | VTC4    | 3  | unassigned     | na      | 150 |
| YJL012C-A | 3171    | 1  | unassigned     | na      | 65  |
| YJL013C   | MAD3    | 1  | fold_recogniti | 1fchA   | 265 |
| YJL013C   | MAD3    | 2  | unassigned     | na      | 124 |

|         |         |   |                |        |     |
|---------|---------|---|----------------|--------|-----|
| YJL013C | MAD3    | 3 | msa            | na     | 126 |
| YJL014W | CCT3    | 1 | psiblast       | 1a6dB_ | 534 |
| YJL015C | YJL015C | 1 | unassigned     | na     | 124 |
| YJL016W | YJL016W | 1 | unassigned     | na     | 171 |
| YJL017W | 3176    | 1 | unassigned     | na     | 325 |
| YJL018W | 3177    | 1 | unassigned     | na     | 104 |
| YJL019W | MPS3    | 1 | unassigned     | na     | 110 |
| YJL019W | MPS3    | 2 | fold_recogniti | 1nf1A  | 315 |
| YJL019W | MPS3    | 3 | unassigned     | na     | 195 |
| YJL020C | BBC1    | 1 | fold_recogniti | 1k83A  | 369 |
| YJL020C | BBC1    | 2 | psiblast       | 1i84S_ | 299 |
| YJL020C | BBC1    | 3 | fold_recogniti | 1ldvA  | 103 |
| YJL021C | 3180    | 1 | unassigned     | na     | 365 |
| YJL022W | YJL022W | 1 | unassigned     | na     | 102 |
| YJL023C | PET130  | 1 | unassigned     | na     | 347 |
| YJL024C | APS3    | 1 | psiblast       | 1gw5S_ | 103 |
| YJL024C | APS3    | 2 | psiblast       | 1gw5S_ | 91  |
| YJL025W | RRN7    | 1 | unassigned     | na     | 514 |
| YJL026W | RNR2    | 1 | psiblast       | 1jk0A_ | 399 |
| YJL027C | YJL027C | 1 | unassigned     | na     | 138 |
| YJL028W | YJL028W | 1 | unassigned     | na     | 111 |
| YJL029C | VPS53   | 1 | fold_recogniti | 1n1bA  | 332 |
| YJL029C | VPS53   | 2 | fold_recogniti | 1n1bA  | 58  |
| YJL029C | VPS53   | 3 | fold_recogniti | 1n1bA  | 130 |
| YJL029C | VPS53   | 4 | unassigned     | na     | 302 |
| YJL030W | MAD2    | 1 | psiblast       | 1klqA_ | 196 |
| YJL031C | BET4    | 1 | psiblast       | 1dceA_ | 125 |
| YJL031C | BET4    | 2 | psiblast       | 1dceA_ | 74  |
| YJL031C | BET4    | 3 | psiblast       | 1ihgA_ | 91  |
| YJL032W | YJL032W | 1 | unassigned     | na     | 104 |
| YJL033W | HCA4    | 1 | psiblast       | 1hv8A_ | 261 |
| YJL033W | HCA4    | 2 | psiblast       | 1hv8A_ | 150 |
| YJL033W | HCA4    | 3 | psiblast       | 1d2mA_ | 118 |
| YJL033W | HCA4    | 4 | msa            | na     | 241 |
| YJL034W | KAR2    | 1 | psiblast       | 1hpm__ | 237 |
| YJL034W | KAR2    | 2 | psiblast       | 1hpm__ | 116 |
| YJL034W | KAR2    | 3 | psiblast       | 1hpm__ | 75  |
| YJL034W | KAR2    | 4 | psiblast       | 1ckrA_ | 158 |
| YJL034W | KAR2    | 5 | psiblast       | 1i84S_ | 96  |
| YJL035C | TAD2    | 1 | fold_recogniti | 1jtkA  | 142 |
| YJL035C | TAD2    | 2 | msa            | na     | 108 |
| YJL036W | SNX4    | 1 | psiblast       | 1h6hA_ | 68  |
| YJL036W | SNX4    | 2 | psiblast       | 1i84S_ | 355 |
| YJL037W | YJL037W | 1 | unassigned     | na     | 224 |
| YJL038C | YJL038C | 1 | unassigned     | na     | 219 |
| YJL039C | NUP192  | 1 | unassigned     | na     | 686 |
| YJL039C | NUP192  | 2 | msa            | na     | 518 |
| YJL039C | NUP192  | 3 | unassigned     | na     | 479 |

|           |           |   |                |        |     |
|-----------|-----------|---|----------------|--------|-----|
| YJL041W   | NSP1      | 1 | fold_recogniti | 1deqA  | 68  |
| YJL041W   | NSP1      | 2 | fold_recogniti | 1jv2B  | 293 |
| YJL041W   | NSP1      | 3 | fold_recogniti | 1jv2B  | 164 |
| YJL041W   | NSP1      | 4 | fold_recogniti | 1jv2B  | 103 |
| YJL041W   | NSP1      | 5 | msa            | na     | 195 |
| YJL042W   | MHP1      | 1 | msa            | na     | 677 |
| YJL042W   | MHP1      | 2 | msa            | na     | 321 |
| YJL042W   | MHP1      | 3 | unassigned     | na     | 400 |
| YJL043W   | YJL043W   | 1 | msa            | na     | 139 |
| YJL043W   | YJL043W   | 2 | unassigned     | na     | 118 |
| YJL044C   | GYP6      | 1 | unassigned     | na     | 82  |
| YJL044C   | GYP6      | 2 | psiblast       | 1fkmA_ | 198 |
| YJL044C   | GYP6      | 3 | psiblast       | 1fkmA_ | 68  |
| YJL044C   | GYP6      | 4 | unassigned     | na     | 110 |
| YJL045W   | YJL045W   | 1 | psiblast       | 1kf6A_ | 349 |
| YJL045W   | YJL045W   | 2 | psiblast       | 1kf6A_ | 285 |
| YJL046W   | YJL046W   | 1 | unassigned     | na     | 110 |
| YJL046W   | YJL046W   | 2 | msa            | na     | 118 |
| YJL046W   | YJL046W   | 3 | fold_recogniti | 1hxdA  | 223 |
| YJL047C   | RTT101    | 1 | psiblast       | 1ldjA_ | 383 |
| YJL047C   | RTT101    | 2 | psiblast       | 1ldjA_ | 168 |
| YJL047C   | RTT101    | 3 | psiblast       | 1ldjA_ | 98  |
| YJL047C   | RTT101    | 4 | psiblast       | 1ldjA_ | 124 |
| YJL047C   | RTT101    | 5 | psiblast       | 1ldjA_ | 69  |
| YJL048C   | UBX6      | 1 | unassigned     | na     | 67  |
| YJL048C   | UBX6      | 2 | msa            | na     | 117 |
| YJL048C   | UBX6      | 3 | psiblast       | 1h8cA_ | 118 |
| YJL048C   | UBX6      | 4 | unassigned     | na     | 94  |
| YJL049W   | YJL049W   | 1 | unassigned     | na     | 84  |
| YJL049W   | YJL049W   | 2 | psiblast       | 1i84S_ | 366 |
| YJL050W   | MTR4      | 1 | unassigned     | na     | 109 |
| YJL050W   | MTR4      | 2 | psiblast       | 1hv8A_ | 212 |
| YJL050W   | MTR4      | 3 | psiblast       | 1hv8A_ | 134 |
| YJL050W   | MTR4      | 4 | psiblast       | 1fukA_ | 181 |
| YJL050W   | MTR4      | 5 | unassigned     | na     | 116 |
| YJL050W   | MTR4      | 6 | fold_recogniti | 1n1bA  | 228 |
| YJL050W   | MTR4      | 7 | fold_recogniti | 1n1bA  | 93  |
| YJL051W   | YJL051W   | 1 | unassigned     | na     | 154 |
| YJL051W   | YJL051W   | 2 | msa            | na     | 537 |
| YJL051W   | YJL051W   | 3 | msa            | na     | 131 |
| YJL052C-A | YJL052C-A | 1 | unassigned     | na     | 39  |
| YJL052W   | TDH1      | 1 | psiblast       | 3gpdR_ | 161 |
| YJL052W   | TDH1      | 2 | psiblast       | 3gpdR_ | 171 |
| YJL053W   | PEP8      | 1 | fold_recogniti | 1cf1A  | 188 |
| YJL053W   | PEP8      | 2 | fold_recogniti | 1cf1A  | 191 |
| YJL054W   | TIM54     | 1 | msa            | na     | 166 |
| YJL054W   | TIM54     | 2 | unassigned     | na     | 173 |
| YJL054W   | TIM54     | 3 | msa            | na     | 139 |

|           |           |   |                |         |     |
|-----------|-----------|---|----------------|---------|-----|
| YJL055W   | YJL055W   | 1 | pfam           | PF03641 | 245 |
| YJL056C   | ZAP1      | 1 | msa            | na      | 118 |
| YJL056C   | ZAP1      | 2 | msa            | na      | 168 |
| YJL056C   | ZAP1      | 3 | unassigned     | na      | 122 |
| YJL056C   | ZAP1      | 4 | msa            | na      | 151 |
| YJL056C   | ZAP1      | 5 | msa            | na      | 131 |
| YJL056C   | ZAP1      | 6 | psiblast       | 2gliA_  | 97  |
| YJL056C   | ZAP1      | 7 | psiblast       | 2gliA_  | 93  |
| YJL057C   | YJL057C   | 1 | unassigned     | na      | 140 |
| YJL057C   | YJL057C   | 2 | psiblast       | 1a06__  | 139 |
| YJL057C   | YJL057C   | 3 | psiblast       | 1a06__  | 291 |
| YJL057C   | YJL057C   | 4 | unassigned     | na      | 97  |
| YJL058C   | BIT61     | 1 | unassigned     | na      | 543 |
| YJL059W   | YHC3      | 1 | pfam           | PF02487 | 408 |
| YJL060W   | BNA3      | 1 | psiblast       | 1gd9A_  | 309 |
| YJL060W   | BNA3      | 2 | psiblast       | 1gd9A_  | 135 |
| YJL061W   | NUP82     | 1 | msa            | na      | 200 |
| YJL061W   | NUP82     | 2 | unassigned     | na      | 274 |
| YJL061W   | NUP82     | 3 | msa            | na      | 239 |
| YJL062W   | LAS21     | 1 | psiblast       | 1e3cP_  | 378 |
| YJL062W   | LAS21     | 2 | msa            | na      | 130 |
| YJL062W   | LAS21     | 3 | unassigned     | na      | 196 |
| YJL062W   | LAS21     | 4 | msa            | na      | 126 |
| YJL062W-A | YJL062W-A | 1 | unassigned     | na      | 85  |
| YJL063C   | MRPL8     | 1 | psiblast       | 1gd8A_  | 161 |
| YJL063C   | MRPL8     | 2 | unassigned     | na      | 77  |
| YJL064W   | YJL064W   | 1 | unassigned     | na      | 131 |
| YJL065C   | DLS1      | 1 | psiblast       | 1jfiA_  | 110 |
| YJL065C   | DLS1      | 2 | unassigned     | na      | 57  |
| YJL066C   | MPM1      | 1 | unassigned     | na      | 252 |
| YJL067W   | YJL067W   | 1 | unassigned     | na      | 116 |
| YJL068C   | YJL068C   | 1 | psiblast       | 1f0nA_  | 299 |
| YJL069C   | UTP18     | 1 | unassigned     | na      | 90  |
| YJL069C   | UTP18     | 2 | msa            | na      | 141 |
| YJL069C   | UTP18     | 3 | psiblast       | 1gg2B_  | 363 |
| YJL070C   | YJL070C   | 1 | unassigned     | na      | 426 |
| YJL070C   | YJL070C   | 2 | fold_recogniti | 1m7mA   | 462 |
| YJL071W   | ARG2      | 1 | unassigned     | na      | 400 |
| YJL071W   | ARG2      | 2 | msa            | na      | 174 |
| YJL072C   | PSF2      | 1 | unassigned     | na      | 115 |
| YJL072C   | PSF2      | 2 | msa            | na      | 98  |
| YJL073W   | JEM1      | 1 | unassigned     | na      | 111 |
| YJL073W   | JEM1      | 2 | psiblast       | 1a17__  | 199 |
| YJL073W   | JEM1      | 3 | unassigned     | na      | 59  |
| YJL073W   | JEM1      | 4 | msa            | na      | 162 |
| YJL073W   | JEM1      | 5 | psiblast       | 1xbl__  | 114 |
| YJL074C   | SMC3      | 1 | psiblast       | 1br2A_  | 50  |
| YJL074C   | SMC3      | 2 | psiblast       | 1i84S_  | 344 |

|         |         |                  |        |     |
|---------|---------|------------------|--------|-----|
| YJL074C | SMC3    | 3 unassigned     | na     | 57  |
| YJL074C | SMC3    | 4 psiblast       | 1gxIA_ | 122 |
| YJL074C | SMC3    | 5 psiblast       | 1gxIA_ | 46  |
| YJL074C | SMC3    | 6 psiblast       | 1gxIA_ | 44  |
| YJL074C | SMC3    | 7 psiblast       | 1c1gA_ | 67  |
| YJL074C | SMC3    | 8 psiblast       | 1c1gA_ | 262 |
| YJL074C | SMC3    | 9 unassigned     | na     | 53  |
| YJL074C | SMC3    | 10 psiblast      | 1e69A_ | 185 |
| YJL075C | APQ13   | 1 unassigned     | na     | 138 |
| YJL076W | NET1    | 1 msa            | na     | 226 |
| YJL076W | NET1    | 2 unassigned     | na     | 70  |
| YJL076W | NET1    | 3 psiblast       | 1i84S_ | 361 |
| YJL076W | NET1    | 4 fold_recogniti | 1l8mA  | 106 |
| YJL076W | NET1    | 5 fold_recogniti | 1l8mA  | 73  |
| YJL076W | NET1    | 6 fold_recogniti | 1l8mA  | 79  |
| YJL076W | NET1    | 7 fold_recogniti | 1l8mA  | 70  |
| YJL076W | NET1    | 8 fold_recogniti | 1deqA  | 204 |
| YJL077C | ICS3    | 1 unassigned     | na     | 131 |
| YJL078C | PRY3    | 1 psiblast       | 1cfe__ | 168 |
| YJL078C | PRY3    | 2 fold_recogniti | 1m2vB  | 129 |
| YJL078C | PRY3    | 3 fold_recogniti | 1jv2B  | 323 |
| YJL078C | PRY3    | 4 fold_recogniti | 1jv2B  | 103 |
| YJL078C | PRY3    | 5 fold_recogniti | 1ei3A  | 74  |
| YJL078C | PRY3    | 6 unassigned     | na     | 84  |
| YJL079C | PRY1    | 1 fold_recogniti | 1ldvA  | 159 |
| YJL079C | PRY1    | 2 psiblast       | 1cfe__ | 140 |
| YJL080C | SCP160  | 1 msa            | na     | 171 |
| YJL080C | SCP160  | 2 psiblast       | 1k1gA_ | 95  |
| YJL080C | SCP160  | 3 unassigned     | na     | 73  |
| YJL080C | SCP160  | 4 psiblast       | 1hh2P_ | 78  |
| YJL080C | SCP160  | 5 psiblast       | 1e3pA_ | 66  |
| YJL080C | SCP160  | 6 psiblast       | 1e3pA_ | 84  |
| YJL080C | SCP160  | 7 psiblast       | 1e3pA_ | 282 |
| YJL080C | SCP160  | 8 fold_recogniti | 1khmA  | 92  |
| YJL080C | SCP160  | 9 psiblast       | 1vig__ | 69  |
| YJL080C | SCP160  | 10 psiblast      | 1sro__ | 72  |
| YJL080C | SCP160  | 11 psiblast      | 1j4wA_ | 66  |
| YJL080C | SCP160  | 12 psiblast      | 1j4wA_ | 74  |
| YJL081C | ARP4    | 1 psiblast       | 1dgaA_ | 180 |
| YJL081C | ARP4    | 2 psiblast       | 1dgaA_ | 309 |
| YJL082W | IML2    | 1 msa            | na     | 215 |
| YJL082W | IML2    | 2 unassigned     | na     | 171 |
| YJL082W | IML2    | 3 fold_recogniti | 1fchA  | 157 |
| YJL082W | IML2    | 4 fold_recogniti | 1fchA  | 92  |
| YJL082W | IML2    | 5 fold_recogniti | 1fchA  | 96  |
| YJL083W | YJL083W | 1 unassigned     | na     | 433 |
| YJL083W | YJL083W | 2 psiblast       | 1c07A_ | 171 |
| YJL084C | YJL084C | 1 msa            | na     | 241 |

|         |         |   |                |         |     |
|---------|---------|---|----------------|---------|-----|
| YJL084C | YJL084C | 2 | psiblast       | 1jsyA_  | 192 |
| YJL084C | YJL084C | 3 | msa            | na      | 613 |
| YJL085W | EXO70   | 1 | fold_recogniti | 1hciA   | 216 |
| YJL085W | EXO70   | 2 | msa            | na      | 317 |
| YJL085W | EXO70   | 3 | unassigned     | na      | 90  |
| YJL086C | YJL086C | 1 | unassigned     | na      | 122 |
| YJL087C | TRL1    | 1 | msa            | na      | 307 |
| YJL087C | TRL1    | 2 | unassigned     | na      | 520 |
| YJL088W | ARG3    | 1 | unassigned     | na      | 103 |
| YJL088W | ARG3    | 2 | psiblast       | 1c9yA_  | 174 |
| YJL088W | ARG3    | 3 | psiblast       | 1c9yA_  | 163 |
| YJL089W | SIP4    | 1 | psiblast       | 1pyiA_  | 176 |
| YJL089W | SIP4    | 2 | unassigned     | na      | 653 |
| YJL090C | DPB11   | 1 | fold_recogniti | 1I0bA   | 124 |
| YJL090C | DPB11   | 2 | fold_recogniti | 1I0bA   | 139 |
| YJL090C | DPB11   | 3 | unassigned     | na      | 57  |
| YJL090C | DPB11   | 4 | pfam           | PF00533 | 109 |
| YJL090C | DPB11   | 5 | unassigned     | na      | 335 |
| YJL091C | GWT1    | 1 | msa            | na      | 350 |
| YJL091C | GWT1    | 2 | unassigned     | na      | 148 |
| YJL092W | HPR5    | 1 | psiblast       | 1pjr__  | 313 |
| YJL092W | HPR5    | 2 | psiblast       | 1pjr__  | 526 |
| YJL092W | HPR5    | 3 | fold_recogniti | 1ei3A   | 335 |
| YJL093C | TOK1    | 1 | msa            | na      | 117 |
| YJL093C | TOK1    | 2 | msa            | na      | 77  |
| YJL093C | TOK1    | 3 | fold_recogniti | 1f6gA   | 156 |
| YJL093C | TOK1    | 4 | psiblast       | 1lnqA_  | 108 |
| YJL093C | TOK1    | 5 | psiblast       | 1lnqA_  | 180 |
| YJL093C | TOK1    | 6 | unassigned     | na      | 53  |
| YJL094C | KHA1    | 1 | pfam           | PF00999 | 451 |
| YJL094C | KHA1    | 2 | unassigned     | na      | 100 |
| YJL094C | KHA1    | 3 | msa            | na      | 105 |
| YJL094C | KHA1    | 4 | unassigned     | na      | 217 |
| YJL095W | BCK1    | 1 | unassigned     | na      | 653 |
| YJL095W | BCK1    | 2 | fold_recogniti | 1ldvA   | 296 |
| YJL095W | BCK1    | 3 | psiblast       | 1f3mA_  | 83  |
| YJL095W | BCK1    | 4 | unassigned     | na      | 97  |
| YJL095W | BCK1    | 5 | psiblast       | 1f3mC_  | 130 |
| YJL095W | BCK1    | 6 | psiblast       | 1f3mC_  | 219 |
| YJL096W | MRPL49  | 1 | unassigned     | na      | 113 |
| YJL096W | MRPL49  | 2 | psiblast       | 1lnrP_  | 111 |
| YJL097W | YJL097W | 1 | msa            | na      | 129 |
| YJL097W | YJL097W | 2 | unassigned     | na      | 88  |
| YJL098W | SAP185  | 1 | unassigned     | na      | 124 |
| YJL098W | SAP185  | 2 | msa            | na      | 572 |
| YJL098W | SAP185  | 3 | unassigned     | na      | 53  |
| YJL098W | SAP185  | 4 | msa            | na      | 309 |
| YJL099W | CHS6    | 1 | unassigned     | na      | 199 |

|         |         |   |                |         |     |
|---------|---------|---|----------------|---------|-----|
| YJL099W | CHS6    | 2 | msa            | na      | 288 |
| YJL099W | CHS6    | 3 | msa            | na      | 259 |
| YJL100W | LSB6    | 1 | unassigned     | na      | 107 |
| YJL100W | LSB6    | 2 | msa            | na      | 294 |
| YJL100W | LSB6    | 3 | msa            | na      | 154 |
| YJL100W | LSB6    | 4 | unassigned     | na      | 52  |
| YJL101C | GSH1    | 1 | msa            | na      | 237 |
| YJL101C | GSH1    | 2 | pfam           | PF03074 | 441 |
| YJL102W | MEF2    | 1 | psiblast       | 1dar__  | 330 |
| YJL102W | MEF2    | 2 | psiblast       | 1dar__  | 171 |
| YJL102W | MEF2    | 3 | psiblast       | 1dar__  | 273 |
| YJL102W | MEF2    | 4 | fold_recogniti | 1efgA   | 45  |
| YJL103C | YJL103C | 1 | fold_recogniti | 1pyiA   | 110 |
| YJL103C | YJL103C | 2 | unassigned     | na      | 53  |
| YJL103C | YJL103C | 3 | msa            | na      | 213 |
| YJL103C | YJL103C | 4 | msa            | na      | 242 |
| YJL104W | PAM16   | 1 | fold_recogniti | 1gh6A   | 149 |
| YJL105W | SET4    | 1 | msa            | na      | 95  |
| YJL105W | SET4    | 2 | psiblast       | 1fp0A_  | 150 |
| YJL105W | SET4    | 3 | msa            | na      | 315 |
| YJL106W | IME2    | 1 | psiblast       | 1aq1__  | 148 |
| YJL106W | IME2    | 2 | psiblast       | 1aq1__  | 141 |
| YJL106W | IME2    | 3 | psiblast       | 1aq1__  | 51  |
| YJL106W | IME2    | 4 | psiblast       | 1aq1__  | 91  |
| YJL106W | IME2    | 5 | unassigned     | na      | 214 |
| YJL107C | YJL107C | 1 | unassigned     | na      | 109 |
| YJL107C | YJL107C | 2 | msa            | na      | 193 |
| YJL107C | YJL107C | 3 | msa            | na      | 85  |
| YJL108C | PRM10   | 1 | msa            | na      | 212 |
| YJL108C | PRM10   | 2 | unassigned     | na      | 171 |
| YJL109C | UTP10   | 1 | fold_recogniti | 1b3uA   | 186 |
| YJL109C | UTP10   | 2 | fold_recogniti | 1b3uA   | 67  |
| YJL109C | UTP10   | 3 | fold_recogniti | 1b3uA   | 148 |
| YJL109C | UTP10   | 4 | fold_recogniti | 1b3uA   | 205 |
| YJL109C | UTP10   | 5 | unassigned     | na      | 57  |
| YJL109C | UTP10   | 6 | msa            | na      | 155 |
| YJL109C | UTP10   | 7 | msa            | na      | 951 |
| YJL110C | GZF3    | 1 | unassigned     | na      | 123 |
| YJL110C | GZF3    | 2 | psiblast       | 4gatA_  | 69  |
| YJL110C | GZF3    | 3 | msa            | na      | 286 |
| YJL110C | GZF3    | 4 | msa            | na      | 73  |
| YJL111W | CCT7    | 1 | psiblast       | 1a6dA_  | 435 |
| YJL111W | CCT7    | 2 | psiblast       | 1a6dA_  | 115 |
| YJL112W | MDV1    | 1 | psiblast       | 1k32A_  | 516 |
| YJL112W | MDV1    | 2 | psiblast       | 1gg2B_  | 198 |
| YJL115W | ASF1    | 1 | unassigned     | na      | 83  |
| YJL115W | ASF1    | 2 | fold_recogniti | 1l8mA   | 98  |
| YJL115W | ASF1    | 3 | fold_recogniti | 1l8mA   | 98  |

|           |           |    |                |         |     |
|-----------|-----------|----|----------------|---------|-----|
| YJL116C   | NCA3      | 1  | pfam           | PF03856 | 337 |
| YJL117W   | PHO86     | 1  | unassigned     | na      | 311 |
| YJL118W   | YJL118W   | 1  | unassigned     | na      | 219 |
| YJL119C   | YJL119C   | 1  | unassigned     | na      | 107 |
| YJL120W   | YJL120W   | 1  | unassigned     | na      | 107 |
| YJL121C   | RPE1      | 1  | psiblast       | 1rpxA_  | 238 |
| YJL122W   | YJL122W   | 1  | unassigned     | na      | 175 |
| YJL123C   | YJL123C   | 1  | fold_recogniti | 1ldvA   | 267 |
| YJL123C   | YJL123C   | 2  | unassigned     | na      | 211 |
| YJL124C   | LSM1      | 1  | psiblast       | 1i8fA_  | 172 |
| YJL125C   | GCD14     | 1  | psiblast       | 1i9gA_  | 78  |
| YJL125C   | GCD14     | 2  | psiblast       | 1i9gA_  | 234 |
| YJL125C   | GCD14     | 3  | unassigned     | na      | 71  |
| YJL126W   | NIT2      | 1  | psiblast       | 1emsA_  | 307 |
| YJL127C   | SPT10     | 1  | unassigned     | na      | 88  |
| YJL127C   | SPT10     | 2  | psiblast       | 1b87A_  | 221 |
| YJL127C   | SPT10     | 3  | fold_recogniti | 1k6yA   | 88  |
| YJL127C   | SPT10     | 4  | fold_recogniti | 1k6yA   | 243 |
| YJL127W-A | YJL127W-A | 1  | unassigned     | na      | 38  |
| YJL128C   | PBS2      | 1  | unassigned     | na      | 138 |
| YJL128C   | PBS2      | 2  | fold_recogniti | 1ldvA   | 189 |
| YJL128C   | PBS2      | 3  | psiblast       | 1f3mC_  | 110 |
| YJL128C   | PBS2      | 4  | psiblast       | 1f3mC_  | 231 |
| YJL129C   | TRK1      | 1  | unassigned     | na      | 137 |
| YJL129C   | TRK1      | 2  | msa            | na      | 488 |
| YJL129C   | TRK1      | 3  | pfam           | PF02386 | 610 |
| YJL130C   | URA2      | 1  | psiblast       | 1bxrB_  | 190 |
| YJL130C   | URA2      | 2  | psiblast       | 1bxrB_  | 232 |
| YJL130C   | URA2      | 3  | psiblast       | 1a9xA_  | 294 |
| YJL130C   | URA2      | 4  | psiblast       | 1a9xA_  | 174 |
| YJL130C   | URA2      | 5  | psiblast       | 1a9xA_  | 74  |
| YJL130C   | URA2      | 6  | psiblast       | 1a9xA_  | 122 |
| YJL130C   | URA2      | 7  | psiblast       | 1a9xA_  | 212 |
| YJL130C   | URA2      | 8  | psiblast       | 1a9xA_  | 192 |
| YJL130C   | URA2      | 9  | psiblast       | 1gkrA_  | 347 |
| YJL130C   | URA2      | 10 | unassigned     | na      | 60  |
| YJL130C   | URA2      | 11 | psiblast       | 1ekxA_  | 82  |
| YJL130C   | URA2      | 12 | psiblast       | 1ekxA_  | 235 |
| YJL131C   | YJL131C   | 1  | unassigned     | na      | 356 |
| YJL132W   | YJL132W   | 1  | msa            | na      | 301 |
| YJL132W   | YJL132W   | 2  | unassigned     | na      | 449 |
| YJL133W   | MRS3      | 1  | fold_recogniti | 1is2A   | 314 |
| YJL134W   | LCB3      | 1  | unassigned     | na      | 112 |
| YJL134W   | LCB3      | 2  | psiblast       | 1d2tA_  | 156 |
| YJL134W   | LCB3      | 3  | unassigned     | na      | 141 |
| YJL135W   | YJL135W   | 1  | unassigned     | na      | 105 |
| YJL136C   | RPS21B    | 1  | pfam           | PF01249 | 87  |
| YJL136W-A | YJL136W-A | 1  | unassigned     | na      | 27  |



|           |           |   |                |         |     |
|-----------|-----------|---|----------------|---------|-----|
| YJL137C   | GLG2      | 1 | psiblast       | 1II0A_  | 298 |
| YJL137C   | GLG2      | 2 | unassigned     | na      | 82  |
| YJL138C   | TIF2      | 1 | psiblast       | 1fuuA_  | 395 |
| YJL139C   | YUR1      | 1 | pfam           | PF01793 | 428 |
| YJL140W   | RPB4      | 1 | pfam           | PF03874 | 122 |
| YJL140W   | RPB4      | 2 | fold_recogniti | 1go3F   | 99  |
| YJL141C   | YAK1      | 1 | unassigned     | na      | 339 |
| YJL141C   | YAK1      | 2 | psiblast       | 1aq1__  | 112 |
| YJL141C   | YAK1      | 3 | psiblast       | 1aq1__  | 87  |
| YJL141C   | YAK1      | 4 | psiblast       | 1aq1__  | 50  |
| YJL141C   | YAK1      | 5 | psiblast       | 1aq1__  | 73  |
| YJL141C   | YAK1      | 6 | fold_recogniti | 1i09A   | 146 |
| YJL142C   | YJL142C   | 1 | unassigned     | na      | 130 |
| YJL143W   | TIM17     | 1 | pfam           | PF02466 | 158 |
| YJL144W   | YJL144W   | 1 | unassigned     | na      | 104 |
| YJL145W   | SFH5      | 1 | psiblast       | 1aua__  | 232 |
| YJL145W   | SFH5      | 2 | psiblast       | 1aua__  | 62  |
| YJL146W   | IDS2      | 1 | unassigned     | na      | 469 |
| YJL147C   | YJL147C   | 1 | unassigned     | na      | 382 |
| YJL148W   | RPA34     | 1 | unassigned     | na      | 233 |
| YJL149W   | YJL149W   | 1 | pfam           | PF00646 | 103 |
| YJL149W   | YJL149W   | 2 | unassigned     | na      | 560 |
| YJL150W   | YJL150W   | 1 | unassigned     | na      | 100 |
| YJL151C   | SNA3      | 1 | pfam           | PF01679 | 133 |
| YJL152W   | YJL152W   | 1 | unassigned     | na      | 119 |
| YJL153C   | INO1      | 1 | psiblast       | 1jkaA_  | 555 |
| YJL154C   | VPS35     | 1 | unassigned     | na      | 273 |
| YJL154C   | VPS35     | 2 | msa            | na      | 619 |
| YJL154C   | VPS35     | 3 | unassigned     | na      | 52  |
| YJL155C   | FBP26     | 1 | psiblast       | 1bif__  | 222 |
| YJL155C   | FBP26     | 2 | psiblast       | 1bif__  | 230 |
| YJL156C   | SSY5      | 1 | unassigned     | na      | 687 |
| YJL156W-A | YJL156W-A | 1 | unassigned     | na      | 73  |
| YJL157C   | FAR1      | 1 | unassigned     | na      | 174 |
| YJL157C   | FAR1      | 2 | msa            | na      | 347 |
| YJL157C   | FAR1      | 3 | unassigned     | na      | 309 |
| YJL158C   | CIS3      | 1 | msa            | na      | 163 |
| YJL158C   | CIS3      | 2 | msa            | na      | 64  |
| YJL159W   | HSP150    | 1 | fold_recogniti | 1qqeA   | 150 |
| YJL159W   | HSP150    | 2 | fold_recogniti | 1qqeA   | 160 |
| YJL160C   | YJL160C   | 1 | unassigned     | na      | 180 |
| YJL161W   | FMP33     | 1 | unassigned     | na      | 180 |
| YJL162C   | JJJ2      | 1 | psiblast       | 1xbl__  | 124 |
| YJL162C   | JJJ2      | 2 | psiblast       | 1exka_  | 106 |
| YJL162C   | JJJ2      | 3 | msa            | na      | 74  |
| YJL162C   | JJJ2      | 4 | unassigned     | na      | 178 |
| YJL163C   | YJL163C   | 1 | unassigned     | na      | 70  |
| YJL163C   | YJL163C   | 2 | psiblast       | 1ja5A_  | 427 |

|         |         |   |                |         |     |
|---------|---------|---|----------------|---------|-----|
| YJL163C | YJL163C | 3 | psiblast       | 1ja5A_  | 58  |
| YJL164C | TPK1    | 1 | unassigned     | na      | 60  |
| YJL164C | TPK1    | 2 | psiblast       | 1fotA_  | 129 |
| YJL164C | TPK1    | 3 | psiblast       | 1fotA_  | 208 |
| YJL165C | HAL5    | 1 | unassigned     | na      | 464 |
| YJL165C | HAL5    | 2 | psiblast       | 1a06__  | 161 |
| YJL165C | HAL5    | 3 | psiblast       | 1a06__  | 230 |
| YJL166W | QCR8    | 1 | psiblast       | 1ezvG_  | 94  |
| YJL167W | ERG20   | 1 | psiblast       | 1fps__  | 188 |
| YJL167W | ERG20   | 2 | psiblast       | 1fps__  | 100 |
| YJL167W | ERG20   | 3 | psiblast       | 1fps__  | 64  |
| YJL168C | SET2    | 1 | unassigned     | na      | 89  |
| YJL168C | SET2    | 2 | pfam           | PF00856 | 190 |
| YJL168C | SET2    | 3 | unassigned     | na      | 454 |
| YJL169W | YJL169W | 1 | unassigned     | na      | 122 |
| YJL170C | ASG7    | 1 | unassigned     | na      | 183 |
| YJL171C | YJL171C | 1 | unassigned     | na      | 73  |
| YJL171C | YJL171C | 2 | msa            | na      | 323 |
| YJL172W | CPS1    | 1 | unassigned     | na      | 68  |
| YJL172W | CPS1    | 2 | psiblast       | 1cg2A_  | 302 |
| YJL172W | CPS1    | 3 | psiblast       | 1cg2A_  | 109 |
| YJL172W | CPS1    | 4 | fold_recogniti | 1lfwA   | 97  |
| YJL173C | RFA3    | 1 | unassigned     | na      | 122 |
| YJL174W | KRE9    | 1 | unassigned     | na      | 276 |
| YJL175W | YJL175W | 1 | unassigned     | na      | 170 |
| YJL176C | SWI3    | 1 | fold_recogniti | 1l8mA   | 86  |
| YJL176C | SWI3    | 2 | fold_recogniti | 1l8mA   | 73  |
| YJL176C | SWI3    | 3 | fold_recogniti | 1l8mA   | 79  |
| YJL176C | SWI3    | 4 | fold_recogniti | 1l8mA   | 70  |
| YJL176C | SWI3    | 5 | unassigned     | na      | 101 |
| YJL176C | SWI3    | 6 | psiblast       | 1h8qA_  | 76  |
| YJL176C | SWI3    | 7 | fold_recogniti | 1h88C   | 111 |
| YJL176C | SWI3    | 8 | msa            | na      | 229 |
| YJL177W | RPL17B  | 1 | psiblast       | 1k5yN_  | 184 |
| YJL178C | ATG27   | 1 | unassigned     | na      | 196 |
| YJL179W | PFD1    | 1 | unassigned     | na      | 109 |
| YJL180C | ATP12   | 1 | msa            | na      | 134 |
| YJL180C | ATP12   | 2 | unassigned     | na      | 79  |
| YJL180C | ATP12   | 3 | msa            | na      | 112 |
| YJL181W | YJL181W | 1 | msa            | na      | 399 |
| YJL181W | YJL181W | 2 | unassigned     | na      | 212 |
| YJL182C | YJL182C | 1 | unassigned     | na      | 105 |
| YJL183W | MNN11   | 1 | unassigned     | na      | 87  |
| YJL183W | MNN11   | 2 | msa            | na      | 335 |
| YJL184W | GON7    | 1 | unassigned     | na      | 123 |
| YJL185C | YJL185C | 1 | unassigned     | na      | 293 |
| YJL186W | MNN5    | 1 | unassigned     | na      | 136 |
| YJL186W | MNN5    | 2 | fold_recogniti | 1ga8A   | 166 |

|           |         |   |                |         |     |
|-----------|---------|---|----------------|---------|-----|
| YJL186W   | MNN5    | 3 | unassigned     | na      | 284 |
| YJL187C   | SWE1    | 1 | unassigned     | na      | 400 |
| YJL187C   | SWE1    | 2 | psiblast       | 1fotA_  | 116 |
| YJL187C   | SWE1    | 3 | psiblast       | 1fotA_  | 232 |
| YJL187C   | SWE1    | 4 | unassigned     | na      | 71  |
| YJL188C   | BUD19   | 1 | unassigned     | na      | 102 |
| YJL189W   | RPL39   | 1 | pfam           | PF00832 | 51  |
| YJL190C   | RPS22A  | 1 | psiblast       | 1k5xH_  | 79  |
| YJL190C   | RPS22A  | 2 | psiblast       | 1k5xH_  | 51  |
| YJL191W   | RPS14B  | 1 | psiblast       | 1k5xK_  | 138 |
| YJL192C   | SOP4    | 1 | unassigned     | na      | 234 |
| YJL193W   | YJL193W | 1 | msa            | na      | 249 |
| YJL193W   | YJL193W | 2 | msa            | na      | 153 |
| YJL194W   | CDC6    | 1 | psiblast       | 1e32A_  | 290 |
| YJL194W   | CDC6    | 2 | psiblast       | 1e32A_  | 68  |
| YJL194W   | CDC6    | 3 | fold_recogniti | 1fnnA   | 155 |
| YJL195C   | YJL195C | 1 | unassigned     | na      | 233 |
| YJL196C   | ELO1    | 1 | pfam           | PF01151 | 310 |
| YJL197W   | UBP12   | 1 | unassigned     | na      | 90  |
| YJL197W   | UBP12   | 2 | msa            | na      | 244 |
| YJL197W   | UBP12   | 3 | pfam           | PF00442 | 71  |
| YJL197W   | UBP12   | 4 | msa            | na      | 313 |
| YJL197W   | UBP12   | 5 | unassigned     | na      | 193 |
| YJL197W   | UBP12   | 6 | msa            | na      | 124 |
| YJL197W   | UBP12   | 7 | pfam           | PF00443 | 136 |
| YJL197W   | UBP12   | 8 | unassigned     | na      | 83  |
| YJL198W   | PHO90   | 1 | pfam           | PF03105 | 294 |
| YJL198W   | PHO90   | 2 | unassigned     | na      | 95  |
| YJL198W   | PHO90   | 3 | pfam           | PF00939 | 492 |
| YJL199C   | MBB1    | 1 | unassigned     | na      | 108 |
| YJL200C   | YJL200C | 1 | psiblast       | 5acn__  | 584 |
| YJL200C   | YJL200C | 2 | psiblast       | 5acn__  | 205 |
| YJL201W   | ECM25   | 1 | msa            | na      | 133 |
| YJL201W   | ECM25   | 2 | psiblast       | 1rgp__  | 126 |
| YJL201W   | ECM25   | 3 | psiblast       | 1rgp__  | 105 |
| YJL201W   | ECM25   | 4 | fold_recogniti | 1m2vB   | 235 |
| YJL202C   | YJL202C | 1 | unassigned     | na      | 115 |
| YJL203W   | PRP21   | 1 | pfam           | PF01805 | 75  |
| YJL203W   | PRP21   | 2 | pfam           | PF01805 | 133 |
| YJL203W   | PRP21   | 3 | unassigned     | na      | 72  |
| YJL204C   | RCY1    | 1 | pfam           | PF00646 | 88  |
| YJL204C   | RCY1    | 2 | unassigned     | na      | 378 |
| YJL204C   | RCY1    | 3 | fold_recogniti | 1n1bA   | 216 |
| YJL204C   | RCY1    | 4 | fold_recogniti | 1n1bA   | 158 |
| YJL205C-A | 3366    | 1 | unassigned     | na      | 53  |
| YJL206C   | YJL206C | 1 | psiblast       | 1ajyA_  | 116 |
| YJL206C   | YJL206C | 2 | msa            | na      | 268 |
| YJL206C   | YJL206C | 3 | msa            | na      | 285 |

|         |         |                  |         |      |
|---------|---------|------------------|---------|------|
| YJL206C | YJL206C | 4 unassigned     | na      | 89   |
| YJL207C | YJL207C | 1 unassigned     | na      | 1286 |
| YJL207C | YJL207C | 2 msa            | na      | 187  |
| YJL207C | YJL207C | 3 msa            | na      | 365  |
| YJL207C | YJL207C | 4 unassigned     | na      | 176  |
| YJL208C | NUC1    | 1 psiblast       | 1qaeA_  | 329  |
| YJL209W | CBP1    | 1 unassigned     | na      | 557  |
| YJL209W | CBP1    | 2 msa            | na      | 97   |
| YJL210W | PEX2    | 1 unassigned     | na      | 165  |
| YJL210W | PEX2    | 2 psiblast       | 1chc__  | 106  |
| YJL211C | YJL211C | 1 unassigned     | na      | 147  |
| YJL212C | OPT1    | 1 pfam           | PF03169 | 799  |
| YJL213W | YJL213W | 1 psiblast       | 1e9yB_  | 331  |
| YJL214W | HXT8    | 1 psiblast       | 1ja5A_  | 471  |
| YJL214W | HXT8    | 2 psiblast       | 1ja5A_  | 98   |
| YJL215C | YJL215C | 1 unassigned     | na      | 119  |
| YJL216C | YJL216C | 1 psiblast       | 1uok__  | 297  |
| YJL216C | YJL216C | 2 psiblast       | 1uok__  | 284  |
| YJL217W | YJL217W | 1 unassigned     | na      | 198  |
| YJL218W | YJL218W | 1 psiblast       | 1krrA_  | 196  |
| YJL219W | HXT9    | 1 psiblast       | 1ja5A_  | 470  |
| YJL219W | HXT9    | 2 psiblast       | 1ja5A_  | 97   |
| YJL222W | VTH2    | 1 msa            | na      | 182  |
| YJL222W | VTH2    | 2 unassigned     | na      | 354  |
| YJL222W | VTH2    | 3 msa            | na      | 186  |
| YJL222W | VTH2    | 4 msa            | na      | 676  |
| YJL222W | VTH2    | 5 unassigned     | na      | 151  |
| YJL225C | YJL225C | 1 msa            | na      | 238  |
| YJL225C | YJL225C | 2 msa            | na      | 211  |
| YJL225C | YJL225C | 3 unassigned     | na      | 107  |
| YJL225C | YJL225C | 4 psiblast       | 1fuuA_  | 538  |
| YJL225C | YJL225C | 5 fold_recogniti | 1m2vB   | 345  |
| YJL225C | YJL225C | 6 unassigned     | na      | 64   |
| YJL225C | YJL225C | 7 fold_recogniti | 1itwA   | 255  |
| YJR001W | AVT1    | 1 unassigned     | na      | 179  |
| YJR001W | AVT1    | 2 pfam           | PF01490 | 423  |
| YJR002W | MPP10   | 1 fold_recogniti | 1l8mA   | 78   |
| YJR002W | MPP10   | 2 fold_recogniti | 1l8mA   | 79   |
| YJR002W | MPP10   | 3 fold_recogniti | 1l8mA   | 67   |
| YJR002W | MPP10   | 4 fold_recogniti | 1l8mA   | 78   |
| YJR002W | MPP10   | 5 msa            | na      | 199  |
| YJR002W | MPP10   | 6 unassigned     | na      | 92   |
| YJR003C | YJR003C | 1 fold_recogniti | 1n1bA   | 307  |
| YJR003C | YJR003C | 2 fold_recogniti | 1n1bA   | 140  |
| YJR003C | YJR003C | 3 unassigned     | na      | 92   |
| YJR004C | SAG1    | 1 fold_recogniti | 1jv2B   | 369  |
| YJR004C | SAG1    | 2 fold_recogniti | 1jv2B   | 92   |
| YJR004C | SAG1    | 3 fold_recogniti | 1m2vB   | 189  |

|           |         |   |                |        |     |
|-----------|---------|---|----------------|--------|-----|
| YJR005W   | APL1    | 1 | psiblast       | 1gw5B_ | 97  |
| YJR005W   | APL1    | 2 | psiblast       | 1gw5B_ | 108 |
| YJR005W   | APL1    | 3 | psiblast       | 1gw5B_ | 178 |
| YJR005W   | APL1    | 4 | psiblast       | 1gw5B_ | 93  |
| YJR005W   | APL1    | 5 | psiblast       | 1gw5B_ | 135 |
| YJR005W   | APL1    | 6 | unassigned     | na     | 89  |
| YJR006W   | HYS2    | 1 | unassigned     | na     | 141 |
| YJR006W   | HYS2    | 2 | msa            | na     | 346 |
| YJR007W   | SUI2    | 1 | psiblast       | 1kl9A_ | 104 |
| YJR007W   | SUI2    | 2 | psiblast       | 1kl9A_ | 118 |
| YJR007W   | SUI2    | 3 | unassigned     | na     | 82  |
| YJR008W   | YJR008W | 1 | fold_recogniti | 1b4uB  | 213 |
| YJR008W   | YJR008W | 2 | unassigned     | na     | 125 |
| YJR009C   | TDH2    | 1 | psiblast       | 1crwG_ | 119 |
| YJR009C   | TDH2    | 2 | psiblast       | 1crwG_ | 44  |
| YJR009C   | TDH2    | 3 | psiblast       | 1crwG_ | 169 |
| YJR010C-A | SPC1    | 1 | unassigned     | na     | 94  |
| YJR010W   | MET3    | 1 | psiblast       | 1g8fA_ | 166 |
| YJR010W   | MET3    | 2 | psiblast       | 1g8fA_ | 164 |
| YJR010W   | MET3    | 3 | psiblast       | 1g8fA_ | 59  |
| YJR010W   | MET3    | 4 | psiblast       | 1g8fA_ | 122 |
| YJR011C   | YJR011C | 1 | unassigned     | na     | 261 |
| YJR012C   | YJR012C | 1 | unassigned     | na     | 207 |
| YJR013W   | PMH1    | 1 | msa            | na     | 160 |
| YJR013W   | PMH1    | 2 | unassigned     | na     | 145 |
| YJR014W   | YJR014W | 1 | unassigned     | na     | 62  |
| YJR014W   | YJR014W | 2 | psiblast       | 1d1rA_ | 136 |
| YJR015W   | YJR015W | 1 | unassigned     | na     | 510 |
| YJR016C   | ILV3    | 1 | fold_recogniti | 1b8fA  | 100 |
| YJR016C   | ILV3    | 2 | fold_recogniti | 1o0uA  | 220 |
| YJR016C   | ILV3    | 3 | fold_recogniti | 1o0uA  | 265 |
| YJR017C   | ESS1    | 1 | psiblast       | 1f8aB_ | 190 |
| YJR018W   | YJR018W | 1 | unassigned     | na     | 120 |
| YJR019C   | TES1    | 1 | psiblast       | 1c8uA_ | 349 |
| YJR020W   | YJR020W | 1 | unassigned     | na     | 110 |
| YJR021C   | REC107  | 1 | unassigned     | na     | 191 |
| YJR021C   | REC107  | 2 | msa            | na     | 123 |
| YJR022W   | LSM8    | 1 | psiblast       | 1d3bB_ | 128 |
| YJR023C   | YJR023C | 1 | unassigned     | na     | 133 |
| YJR024C   | YJR024C | 1 | psiblast       | 1jdiA_ | 244 |
| YJR025C   | BNA1    | 1 | unassigned     | na     | 177 |
| YJR030C   | YJR030C | 1 | msa            | na     | 420 |
| YJR030C   | YJR030C | 2 | unassigned     | na     | 325 |
| YJR031C   | GEA1    | 1 | msa            | na     | 521 |
| YJR031C   | GEA1    | 2 | psiblast       | 1ku1A_ | 87  |
| YJR031C   | GEA1    | 3 | psiblast       | 1ku1A_ | 150 |
| YJR031C   | GEA1    | 4 | psiblast       | 1fhwA_ | 61  |
| YJR031C   | GEA1    | 5 | fold_recogniti | 1b3uA  | 229 |

|         |         |   |                |         |      |
|---------|---------|---|----------------|---------|------|
| YJR031C | GEA1    | 6 | fold_recogniti | 1b3uA   | 68   |
| YJR031C | GEA1    | 7 | fold_recogniti | 1b3uA   | 292  |
| YJR032W | CPR7    | 1 | psiblast       | 1ihgA_  | 209  |
| YJR032W | CPR7    | 2 | psiblast       | 1ihgA_  | 96   |
| YJR032W | CPR7    | 3 | psiblast       | 1ihgA_  | 88   |
| YJR033C | RAV1    | 1 | psiblast       | 1gg2B_  | 98   |
| YJR033C | RAV1    | 2 | psiblast       | 1erjA_  | 400  |
| YJR033C | RAV1    | 3 | unassigned     | na      | 329  |
| YJR033C | RAV1    | 4 | fold_recogniti | 1n1bA   | 151  |
| YJR033C | RAV1    | 5 | fold_recogniti | 1n1bA   | 135  |
| YJR033C | RAV1    | 6 | unassigned     | na      | 244  |
| YJR034W | PET191  | 1 | unassigned     | na      | 108  |
| YJR035W | RAD26   | 1 | msa            | na      | 285  |
| YJR035W | RAD26   | 2 | pfam           | PF00176 | 315  |
| YJR035W | RAD26   | 3 | psiblast       | 1hv8A_  | 170  |
| YJR035W | RAD26   | 4 | msa            | na      | 188  |
| YJR035W | RAD26   | 5 | msa            | na      | 127  |
| YJR036C | HUL4    | 1 | unassigned     | na      | 448  |
| YJR036C | HUL4    | 2 | psiblast       | 1c4zA_  | 111  |
| YJR036C | HUL4    | 3 | psiblast       | 1c4zA_  | 147  |
| YJR036C | HUL4    | 4 | psiblast       | 1c4zA_  | 186  |
| YJR037W | YJR037W | 1 | unassigned     | na      | 127  |
| YJR038C | YJR038C | 1 | unassigned     | na      | 120  |
| YJR039W | YJR039W | 1 | unassigned     | na      | 1121 |
| YJR040W | GEF1    | 1 | psiblast       | 1kplA_  | 212  |
| YJR040W | GEF1    | 2 | psiblast       | 1kplA_  | 359  |
| YJR040W | GEF1    | 3 | psiblast       | 1b3oA_  | 208  |
| YJR041C | URB2    | 1 | fold_recogniti | 1b3uA   | 267  |
| YJR041C | URB2    | 2 | fold_recogniti | 1b3uA   | 69   |
| YJR041C | URB2    | 3 | fold_recogniti | 1b3uA   | 173  |
| YJR041C | URB2    | 4 | fold_recogniti | 1b3uA   | 239  |
| YJR041C | URB2    | 5 | unassigned     | na      | 255  |
| YJR041C | URB2    | 6 | msa            | na      | 171  |
| YJR042W | NUP85   | 1 | unassigned     | na      | 134  |
| YJR042W | NUP85   | 2 | msa            | na      | 544  |
| YJR042W | NUP85   | 3 | unassigned     | na      | 66   |
| YJR043C | POL32   | 1 | unassigned     | na      | 74   |
| YJR043C | POL32   | 2 | msa            | na      | 276  |
| YJR044C | VPS55   | 1 | unassigned     | na      | 140  |
| YJR045C | SSC1    | 1 | psiblast       | 1dkgD_  | 213  |
| YJR045C | SSC1    | 2 | psiblast       | 1dkgD_  | 118  |
| YJR045C | SSC1    | 3 | psiblast       | 1dkgD_  | 77   |
| YJR045C | SSC1    | 4 | psiblast       | 1dkyA_  | 146  |
| YJR045C | SSC1    | 5 | psiblast       | 1dkyA_  | 100  |
| YJR046W | TAH11   | 1 | unassigned     | na      | 604  |
| YJR047C | ANB1    | 1 | psiblast       | 1fh4A_  | 85   |
| YJR047C | ANB1    | 2 | psiblast       | 1fh4A_  | 72   |
| YJR048W | CYC1    | 1 | psiblast       | 2pccB_  | 109  |

|         |         |   |                |         |     |
|---------|---------|---|----------------|---------|-----|
| YJR049C | UTR1    | 1 | unassigned     | na      | 101 |
| YJR049C | UTR1    | 2 | pfam           | PF01513 | 353 |
| YJR049C | UTR1    | 3 | unassigned     | na      | 76  |
| YJR050W | ISY1    | 1 | fold_recogniti | 1cunA   | 104 |
| YJR050W | ISY1    | 2 | fold_recogniti | 1cunA   | 131 |
| YJR051W | OSM1    | 1 | psiblast       | 1qo8A_  | 348 |
| YJR051W | OSM1    | 2 | psiblast       | 1qo8A_  | 153 |
| YJR052W | RAD7    | 1 | unassigned     | na      | 55  |
| YJR052W | RAD7    | 2 | psiblast       | 2bnh__  | 161 |
| YJR052W | RAD7    | 3 | psiblast       | 2bnh__  | 55  |
| YJR052W | RAD7    | 4 | psiblast       | 2bnh__  | 53  |
| YJR052W | RAD7    | 5 | psiblast       | 2bnh__  | 126 |
| YJR052W | RAD7    | 6 | psiblast       | 2bnh__  | 115 |
| YJR053W | BFA1    | 1 | unassigned     | na      | 325 |
| YJR053W | BFA1    | 2 | msa            | na      | 115 |
| YJR053W | BFA1    | 3 | unassigned     | na      | 134 |
| YJR054W | YJR054W | 1 | msa            | na      | 247 |
| YJR054W | YJR054W | 2 | unassigned     | na      | 250 |
| YJR055W | HIT1    | 1 | unassigned     | na      | 164 |
| YJR056C | YJR056C | 1 | unassigned     | na      | 236 |
| YJR057W | CDC8    | 1 | psiblast       | 1tmkA_  | 216 |
| YJR058C | APS2    | 1 | psiblast       | 1gw5S_  | 90  |
| YJR058C | APS2    | 2 | psiblast       | 1gw5S_  | 57  |
| YJR059W | PTK2    | 1 | unassigned     | na      | 225 |
| YJR059W | PTK2    | 2 | psiblast       | 1aq1__  | 118 |
| YJR059W | PTK2    | 3 | psiblast       | 1aq1__  | 102 |
| YJR059W | PTK2    | 4 | psiblast       | 1aq1__  | 69  |
| YJR059W | PTK2    | 5 | psiblast       | 1aq1__  | 70  |
| YJR059W | PTK2    | 6 | psiblast       | 1a29__  | 87  |
| YJR059W | PTK2    | 7 | psiblast       | 1a29__  | 89  |
| YJR059W | PTK2    | 8 | unassigned     | na      | 58  |
| YJR060W | CBF1    | 1 | unassigned     | na      | 168 |
| YJR060W | CBF1    | 2 | psiblast       | 1hloA_  | 183 |
| YJR061W | YJR061W | 1 | msa            | na      | 157 |
| YJR061W | YJR061W | 2 | unassigned     | na      | 287 |
| YJR061W | YJR061W | 3 | msa            | na      | 168 |
| YJR061W | YJR061W | 4 | msa            | na      | 323 |
| YJR062C | NTA1    | 1 | psiblast       | 1f89A_  | 342 |
| YJR062C | NTA1    | 2 | unassigned     | na      | 115 |
| YJR063W | RPA12   | 1 | psiblast       | 1meyG_  | 125 |
| YJR064W | CCT5    | 1 | psiblast       | 1a6dA_  | 446 |
| YJR064W | CCT5    | 2 | psiblast       | 1a6dA_  | 116 |
| YJR065C | ARP3    | 1 | psiblast       | 1yagA_  | 223 |
| YJR065C | ARP3    | 2 | psiblast       | 1yagA_  | 226 |
| YJR066W | TOR1    | 1 | unassigned     | na      | 85  |
| YJR066W | TOR1    | 2 | psiblast       | 1qgkA_  | 237 |
| YJR066W | TOR1    | 3 | psiblast       | 1qgkA_  | 181 |
| YJR066W | TOR1    | 4 | psiblast       | 1qgkA_  | 122 |

|         |         |    |                |         |     |
|---------|---------|----|----------------|---------|-----|
| YJR066W | TOR1    | 5  | psiblast       | 1qgkA_  | 135 |
| YJR066W | TOR1    | 6  | psiblast       | 1qgkA_  | 228 |
| YJR066W | TOR1    | 7  | psiblast       | 1b3uA_  | 238 |
| YJR066W | TOR1    | 8  | unassigned     | na      | 97  |
| YJR066W | TOR1    | 9  | pfam           | PF02259 | 596 |
| YJR066W | TOR1    | 10 | psiblast       | 1aueA_  | 165 |
| YJR066W | TOR1    | 11 | pfam           | PF00454 | 352 |
| YJR066W | TOR1    | 12 | pfam           | PF02260 | 34  |
| YJR067C | YAE1    | 1  | unassigned     | na      | 141 |
| YJR068W | RFC2    | 1  | psiblast       | 1iqpA_  | 100 |
| YJR068W | RFC2    | 2  | psiblast       | 1iqpA_  | 253 |
| YJR069C | HAM1    | 1  | psiblast       | 1b78A_  | 110 |
| YJR069C | HAM1    | 2  | psiblast       | 1b78A_  | 87  |
| YJR070C | LIA1    | 1  | psiblast       | 1b3uA_  | 142 |
| YJR070C | LIA1    | 2  | psiblast       | 1b3uA_  | 183 |
| YJR071W | YJR071W | 1  | unassigned     | na      | 122 |
| YJR072C | YJR072C | 1  | psiblast       | 2ffhA_  | 270 |
| YJR072C | YJR072C | 2  | psiblast       | 2ffhA_  | 115 |
| YJR073C | OPI3    | 1  | msa            | na      | 132 |
| YJR073C | OPI3    | 2  | msa            | na      | 74  |
| YJR074W | MOG1    | 1  | psiblast       | 1eq6A_  | 218 |
| YJR075W | HOC1    | 1  | msa            | na      | 328 |
| YJR075W | HOC1    | 2  | unassigned     | na      | 68  |
| YJR076C | CDC11   | 1  | psiblast       | 1egaA_  | 175 |
| YJR076C | CDC11   | 2  | psiblast       | 1i84S_  | 240 |
| YJR077C | MIR1    | 1  | fold_recogniti | 1is2A   | 311 |
| YJR078W | BNA2    | 1  | pfam           | PF01231 | 453 |
| YJR079W | YJR079W | 1  | unassigned     | na      | 109 |
| YJR080C | FMP26   | 1  | unassigned     | na      | 394 |
| YJR082C | EAF6    | 1  | unassigned     | na      | 113 |
| YJR083C | ACF4    | 1  | unassigned     | na      | 309 |
| YJR084W | CSN12   | 1  | unassigned     | na      | 103 |
| YJR084W | CSN12   | 2  | msa            | na      | 320 |
| YJR085C | YJR085C | 1  | pfam           | PF03647 | 105 |
| YJR086W | STE18   | 1  | psiblast       | 1scgG_  | 110 |
| YJR087W | YJR087W | 1  | unassigned     | na      | 116 |
| YJR088C | YJR088C | 1  | psiblast       | 1fchA_  | 100 |
| YJR088C | YJR088C | 2  | psiblast       | 1fchA_  | 77  |
| YJR088C | YJR088C | 3  | psiblast       | 1fchA_  | 115 |
| YJR089W | BIR1    | 1  | pfam           | PF00653 | 128 |
| YJR089W | BIR1    | 2  | fold_recogniti | 1e31A   | 152 |
| YJR089W | BIR1    | 3  | msa            | na      | 355 |
| YJR089W | BIR1    | 4  | unassigned     | na      | 102 |
| YJR089W | BIR1    | 5  | msa            | na      | 217 |
| YJR090C | GRR1    | 1  | unassigned     | na      | 96  |
| YJR090C | GRR1    | 2  | psiblast       | 1k15A_  | 173 |
| YJR090C | GRR1    | 3  | unassigned     | na      | 63  |
| YJR090C | GRR1    | 4  | psiblast       | 2bnh__  | 92  |



|           |         |    |                |         |     |
|-----------|---------|----|----------------|---------|-----|
| YJR090C   | GRR1    | 5  | psiblast       | 2bnh__  | 53  |
| YJR090C   | GRR1    | 6  | psiblast       | 2bnh__  | 52  |
| YJR090C   | GRR1    | 7  | psiblast       | 2bnh__  | 119 |
| YJR090C   | GRR1    | 8  | psiblast       | 2bnh__  | 106 |
| YJR090C   | GRR1    | 9  | psiblast       | 1j15A_  | 291 |
| YJR090C   | GRR1    | 10 | unassigned     | na      | 106 |
| YJR091C   | JSN1    | 1  | msa            | na      | 299 |
| YJR091C   | JSN1    | 2  | fold_recogniti | 1h2tZ   | 149 |
| YJR091C   | JSN1    | 3  | unassigned     | na      | 118 |
| YJR091C   | JSN1    | 4  | psiblast       | 1ib2A_  | 125 |
| YJR091C   | JSN1    | 5  | psiblast       | 1ib2A_  | 101 |
| YJR091C   | JSN1    | 6  | psiblast       | 1ib2A_  | 150 |
| YJR091C   | JSN1    | 7  | unassigned     | na      | 149 |
| YJR092W   | BUD4    | 1  | msa            | na      | 164 |
| YJR092W   | BUD4    | 2  | unassigned     | na      | 596 |
| YJR092W   | BUD4    | 3  | msa            | na      | 119 |
| YJR092W   | BUD4    | 4  | unassigned     | na      | 382 |
| YJR092W   | BUD4    | 5  | pfam           | PF00169 | 187 |
| YJR093C   | FIP1    | 1  | msa            | na      | 258 |
| YJR093C   | FIP1    | 2  | unassigned     | na      | 69  |
| YJR094C   | IME1    | 1  | unassigned     | na      | 360 |
| YJR094W-A | RPL43B  | 1  | psiblast       | 1k5y2_  | 92  |
| YJR095W   | SFC1    | 1  | pfam           | PF00153 | 107 |
| YJR095W   | SFC1    | 2  | pfam           | PF00153 | 104 |
| YJR095W   | SFC1    | 3  | pfam           | PF00153 | 111 |
| YJR096W   | YJR096W | 1  | psiblast       | 1ihiA_  | 220 |
| YJR096W   | YJR096W | 2  | psiblast       | 1ihiA_  | 62  |
| YJR097W   | JJ3     | 1  | psiblast       | 1xbl__  | 172 |
| YJR098C   | YJR098C | 1  | unassigned     | na      | 301 |
| YJR098C   | YJR098C | 2  | msa            | na      | 206 |
| YJR098C   | YJR098C | 3  | unassigned     | na      | 148 |
| YJR099W   | YUH1    | 1  | psiblast       | 1cmxA_  | 236 |
| YJR100C   | YJR100C | 1  | pfam           | PF03803 | 327 |
| YJR101W   | RSM26   | 1  | psiblast       | 1kkcA_  | 266 |
| YJR102C   | VPS25   | 1  | unassigned     | na      | 115 |
| YJR102C   | VPS25   | 2  | msa            | na      | 87  |
| YJR103W   | URA8    | 1  | fold_recogniti | 1cp2A   | 208 |
| YJR103W   | URA8    | 2  | psiblast       | 1bxrB_  | 356 |
| YJR104C   | SOD1    | 1  | psiblast       | 1b4IA_  | 154 |
| YJR105W   | ADO1    | 1  | psiblast       | 1InjA_  | 340 |
| YJR106W   | ECM27   | 1  | fold_recogniti | 1I9uD   | 130 |
| YJR106W   | ECM27   | 2  | fold_recogniti | 1itwA   | 292 |
| YJR106W   | ECM27   | 3  | fold_recogniti | 1itwA   | 174 |
| YJR106W   | ECM27   | 4  | msa            | na      | 129 |
| YJR107W   | YJR107W | 1  | psiblast       | 1dt3A_  | 328 |
| YJR108W   | ABM1    | 1  | unassigned     | na      | 123 |
| YJR109C   | CPA2    | 1  | psiblast       | 1bxrA_  | 682 |
| YJR109C   | CPA2    | 2  | psiblast       | 1bxrA_  | 322 |

|         |         |   |                |         |     |
|---------|---------|---|----------------|---------|-----|
| YJR109C | CPA2    | 3 | psiblast       | 1bxA_   | 114 |
| YJR110W | YJR110W | 1 | msa            | na      | 170 |
| YJR110W | YJR110W | 2 | msa            | na      | 518 |
| YJR111C | YJR111C | 1 | unassigned     | na      | 137 |
| YJR111C | YJR111C | 2 | msa            | na      | 146 |
| YJR112W | NNF1    | 1 | msa            | na      | 201 |
| YJR113C | RSM7    | 1 | unassigned     | na      | 89  |
| YJR113C | RSM7    | 2 | psiblast       | 1rss__  | 62  |
| YJR113C | RSM7    | 3 | psiblast       | 1rss__  | 96  |
| YJR114W | SRF2    | 1 | unassigned     | na      | 130 |
| YJR115W | YJR115W | 1 | unassigned     | na      | 169 |
| YJR116W | YJR116W | 1 | msa            | na      | 279 |
| YJR117W | STE24   | 1 | unassigned     | na      | 226 |
| YJR117W | STE24   | 2 | pfam           | PF01435 | 227 |
| YJR118C | ILM1    | 1 | msa            | na      | 203 |
| YJR119C | YJR119C | 1 | pfam           | PF02375 | 70  |
| YJR119C | YJR119C | 2 | unassigned     | na      | 161 |
| YJR119C | YJR119C | 3 | psiblast       | 1f62A_  | 87  |
| YJR119C | YJR119C | 4 | unassigned     | na      | 59  |
| YJR119C | YJR119C | 5 | fold_recogniti | 1mzeA   | 177 |
| YJR119C | YJR119C | 6 | msa            | na      | 174 |
| YJR120W | YJR120W | 1 | unassigned     | na      | 116 |
| YJR121W | ATP2    | 1 | psiblast       | 1bmfD_  | 115 |
| YJR121W | ATP2    | 2 | psiblast       | 1bmfD_  | 255 |
| YJR121W | ATP2    | 3 | psiblast       | 1bmfD_  | 141 |
| YJR122W | CAF17   | 1 | unassigned     | na      | 132 |
| YJR122W | CAF17   | 2 | msa            | na      | 365 |
| YJR123W | RPS5    | 1 | fold_recogniti | 1iqvA   | 75  |
| YJR123W | RPS5    | 2 | psiblast       | 1k5xG_  | 150 |
| YJR124C | YJR124C | 1 | psiblast       | 1ja5A_  | 448 |
| YJR125C | ENT3    | 1 | psiblast       | 1inzA_  | 167 |
| YJR125C | ENT3    | 2 | msa            | na      | 241 |
| YJR126C | VPS70   | 1 | unassigned     | na      | 124 |
| YJR126C | VPS70   | 2 | psiblast       | 1de4C_  | 352 |
| YJR126C | VPS70   | 3 | psiblast       | 1de4C_  | 335 |
| YJR127C | ZMS1    | 1 | psiblast       | 2gliA_  | 92  |
| YJR127C | ZMS1    | 2 | unassigned     | na      | 110 |
| YJR127C | ZMS1    | 3 | psiblast       | 2drpA_  | 45  |
| YJR127C | ZMS1    | 4 | msa            | na      | 76  |
| YJR127C | ZMS1    | 5 | unassigned     | na      | 239 |
| YJR127C | ZMS1    | 6 | msa            | na      | 818 |
| YJR128W | YJR128W | 1 | unassigned     | na      | 119 |
| YJR129C | YJR129C | 1 | msa            | na      | 121 |
| YJR129C | YJR129C | 2 | psiblast       | 1g6q1_  | 218 |
| YJR130C | STR2    | 1 | psiblast       | 1h7dA_  | 107 |
| YJR130C | STR2    | 2 | unassigned     | na      | 73  |
| YJR130C | STR2    | 3 | psiblast       | 1gc0A_  | 321 |
| YJR130C | STR2    | 4 | psiblast       | 1gc0A_  | 138 |

|           |         |   |                |         |      |
|-----------|---------|---|----------------|---------|------|
| YJR131W   | MNS1    | 1 | psiblast       | 1dl2A_  | 357  |
| YJR131W   | MNS1    | 2 | psiblast       | 1dl2A_  | 192  |
| YJR132W   | NMD5    | 1 | msa            | na      | 726  |
| YJR132W   | NMD5    | 2 | msa            | na      | 140  |
| YJR132W   | NMD5    | 3 | msa            | na      | 182  |
| YJR133W   | XPT1    | 1 | psiblast       | 1bzyA_  | 209  |
| YJR134C   | SGM1    | 1 | psiblast       | 1i84S_  | 244  |
| YJR134C   | SGM1    | 2 | unassigned     | na      | 66   |
| YJR134C   | SGM1    | 3 | psiblast       | 2tmaA_  | 104  |
| YJR134C   | SGM1    | 4 | msa            | na      | 293  |
| YJR135C   | MCM22   | 1 | unassigned     | na      | 239  |
| YJR135W-A | TIM8    | 1 | pfam           | PF02953 | 87   |
| YJR136C   | YJR136C | 1 | unassigned     | na      | 421  |
| YJR137C   | ECM17   | 1 | fold_recogniti | 1ik6A   | 192  |
| YJR137C   | ECM17   | 2 | fold_recogniti | 1ik6A   | 127  |
| YJR137C   | ECM17   | 3 | psiblast       | 1b0pA_  | 360  |
| YJR137C   | ECM17   | 4 | psiblast       | 1b1cA_  | 178  |
| YJR137C   | ECM17   | 5 | psiblast       | 1aop__  | 332  |
| YJR137C   | ECM17   | 6 | psiblast       | 1aop__  | 253  |
| YJR138W   | IML1    | 1 | unassigned     | na      | 113  |
| YJR138W   | IML1    | 2 | msa            | na      | 460  |
| YJR138W   | IML1    | 3 | unassigned     | na      | 279  |
| YJR138W   | IML1    | 4 | msa            | na      | 101  |
| YJR138W   | IML1    | 5 | unassigned     | na      | 217  |
| YJR138W   | IML1    | 6 | psiblast       | 1fshA_  | 134  |
| YJR138W   | IML1    | 7 | unassigned     | na      | 280  |
| YJR139C   | HOM6    | 1 | psiblast       | 1ebfA_  | 163  |
| YJR139C   | HOM6    | 2 | psiblast       | 1ebfA_  | 196  |
| YJR140C   | HIR3    | 1 | unassigned     | na      | 521  |
| YJR140C   | HIR3    | 2 | msa            | na      | 1127 |
| YJR141W   | YJR141W | 1 | unassigned     | na      | 347  |
| YJR142W   | YJR142W | 1 | unassigned     | na      | 121  |
| YJR142W   | YJR142W | 2 | psiblast       | 1hztA_  | 221  |
| YJR143C   | PMT4    | 1 | pfam           | PF02366 | 322  |
| YJR143C   | PMT4    | 2 | pfam           | PF02815 | 69   |
| YJR143C   | PMT4    | 3 | fold_recogniti | 1n4kA   | 147  |
| YJR143C   | PMT4    | 4 | unassigned     | na      | 73   |
| YJR143C   | PMT4    | 5 | msa            | na      | 151  |
| YJR144W   | MGM101  | 1 | unassigned     | na      | 77   |
| YJR144W   | MGM101  | 2 | msa            | na      | 192  |
| YJR146W   | YJR146W | 1 | unassigned     | na      | 117  |
| YJR147W   | HMS2    | 1 | psiblast       | 3htsB_  | 113  |
| YJR147W   | HMS2    | 2 | msa            | na      | 140  |
| YJR147W   | HMS2    | 3 | unassigned     | na      | 105  |
| YJR148W   | BAT2    | 1 | psiblast       | 1ekfA_  | 195  |
| YJR148W   | BAT2    | 2 | psiblast       | 1ekfA_  | 181  |
| YJR149W   | YJR149W | 1 | psiblast       | 1jr1A_  | 404  |
| YJR150C   | DAN1    | 1 | fold_recogniti | 1m2vB   | 298  |

|           |         |   |                |         |     |
|-----------|---------|---|----------------|---------|-----|
| YJR151C   | DAN4    | 1 | pfam           | PF00660 | 125 |
| YJR151C   | DAN4    | 2 | unassigned     | na      | 110 |
| YJR151C   | DAN4    | 3 | msa            | na      | 388 |
| YJR151C   | DAN4    | 4 | msa            | na      | 239 |
| YJR151C   | DAN4    | 5 | msa            | na      | 299 |
| YJR152W   | DAL5    | 1 | unassigned     | na      | 73  |
| YJR152W   | DAL5    | 2 | psiblast       | 1ja5A_  | 470 |
| YJR153W   | PGU1    | 1 | psiblast       | 1czfA_  | 361 |
| YJR154W   | YJR154W | 1 | msa            | na      | 346 |
| YJR155W   | AAD10   | 1 | psiblast       | 1gveB_  | 288 |
| YJR156C   | THI11   | 1 | psiblast       | 1gggA_  | 188 |
| YJR156C   | THI11   | 2 | psiblast       | 1gggA_  | 98  |
| YJR156C   | THI11   | 3 | unassigned     | na      | 54  |
| YJR157W   | YJR157W | 1 | unassigned     | na      | 120 |
| YJR158W   | HXT16   | 1 | psiblast       | 1ja5A_  | 465 |
| YJR158W   | HXT16   | 2 | psiblast       | 1ja5A_  | 102 |
| YJR159W   | SOR1    | 1 | psiblast       | 1e3jA_  | 188 |
| YJR159W   | SOR1    | 2 | psiblast       | 1e3jA_  | 169 |
| YJR160C   | MPH3    | 1 | unassigned     | na      | 68  |
| YJR160C   | MPH3    | 2 | psiblast       | 1ja5A_  | 429 |
| YJR160C   | MPH3    | 3 | psiblast       | 1ja5A_  | 105 |
| YJR161C   | COS5    | 1 | msa            | na      | 61  |
| YJR161C   | COS5    | 2 | pfam           | PF00674 | 108 |
| YJR161C   | COS5    | 3 | unassigned     | na      | 53  |
| YJR161C   | COS5    | 4 | pfam           | PF00674 | 161 |
| YJR162C   | YJR162C | 1 | unassigned     | na      | 116 |
| YKL001C   | MET14   | 1 | psiblast       | 1d6jA_  | 202 |
| YKL002W   | DID4    | 1 | pfam           | PF03357 | 151 |
| YKL002W-A | 3548    | 1 | unassigned     | na      | 39  |
| YKL003C   | MRP17   | 1 | psiblast       | 1fjgF_  | 131 |
| YKL004W   | AUR1    | 1 | unassigned     | na      | 220 |
| YKL004W   | AUR1    | 2 | fold_recogniti | 1d2tA   | 125 |
| YKL004W   | AUR1    | 3 | unassigned     | na      | 56  |
| YKL005C   | BYE1    | 1 | fold_recogniti | 1fp0A   | 193 |
| YKL005C   | BYE1    | 2 | unassigned     | na      | 61  |
| YKL005C   | BYE1    | 3 | psiblast       | 1enwA_  | 97  |
| YKL005C   | BYE1    | 4 | msa            | na      | 71  |
| YKL005C   | BYE1    | 5 | unassigned     | na      | 172 |
| YKL006C-A | SFT1    | 1 | psiblast       | 1sfcD_  | 97  |
| YKL006W   | RPL14A  | 1 | pfam           | PF00467 | 50  |
| YKL006W   | RPL14A  | 2 | pfam           | PF01929 | 88  |
| YKL007W   | CAP1    | 1 | pfam           | PF01267 | 268 |
| YKL008C   | LAC1    | 1 | msa            | na      | 164 |
| YKL008C   | LAC1    | 2 | pfam           | PF03798 | 254 |
| YKL009W   | MRT4    | 1 | psiblast       | 1jj2G_  | 236 |
| YKL010C   | UFD4    | 1 | unassigned     | na      | 72  |
| YKL010C   | UFD4    | 2 | psiblast       | 1qgkB_  | 86  |
| YKL010C   | UFD4    | 3 | psiblast       | 1ejll_  | 136 |

|           |           |    |                |         |      |
|-----------|-----------|----|----------------|---------|------|
| YKL010C   | UFD4      | 4  | psiblast       | 1ejll_  | 49   |
| YKL010C   | UFD4      | 5  | psiblast       | 1ejll_  | 114  |
| YKL010C   | UFD4      | 6  | psiblast       | 1ejll_  | 111  |
| YKL010C   | UFD4      | 7  | psiblast       | 1ejll_  | 102  |
| YKL010C   | UFD4      | 8  | unassigned     | na      | 303  |
| YKL010C   | UFD4      | 9  | psiblast       | 1i5hW_  | 119  |
| YKL010C   | UFD4      | 10 | psiblast       | 1c4zA_  | 46   |
| YKL010C   | UFD4      | 11 | psiblast       | 1c4zA_  | 168  |
| YKL010C   | UFD4      | 12 | psiblast       | 1c4zA_  | 177  |
| YKL011C   | CCE1      | 1  | psiblast       | 1kcfA_  | 353  |
| YKL012W   | PRP40     | 1  | psiblast       | 1e0IA_  | 33   |
| YKL012W   | PRP40     | 2  | psiblast       | 1i5hW_  | 49   |
| YKL012W   | PRP40     | 3  | unassigned     | na      | 71   |
| YKL012W   | PRP40     | 4  | psiblast       | 1i84S_  | 341  |
| YKL012W   | PRP40     | 5  | pfam           | PF01846 | 89   |
| YKL013C   | ARC19     | 1  | psiblast       | 1k8kF_  | 171  |
| YKL014C   | URB1      | 1  | fold_recogniti | 1b3uA   | 230  |
| YKL014C   | URB1      | 2  | fold_recogniti | 1b3uA   | 74   |
| YKL014C   | URB1      | 3  | fold_recogniti | 1b3uA   | 152  |
| YKL014C   | URB1      | 4  | fold_recogniti | 1b3uA   | 237  |
| YKL014C   | URB1      | 5  | unassigned     | na      | 1071 |
| YKL015W   | PUT3      | 1  | psiblast       | 1ajyA_  | 132  |
| YKL015W   | PUT3      | 2  | msa            | na      | 681  |
| YKL015W   | PUT3      | 3  | unassigned     | na      | 166  |
| YKL016C   | ATP7      | 1  | fold_recogniti | 2tmaB   | 101  |
| YKL016C   | ATP7      | 2  | fold_recogniti | 2tmaB   | 73   |
| YKL017C   | HCS1      | 1  | msa            | na      | 186  |
| YKL017C   | HCS1      | 2  | psiblast       | 1pjr__  | 497  |
| YKL018C-A | YKL018C-A | 1  | unassigned     | na      | 99   |
| YKL018W   | SWD2      | 1  | psiblast       | 1gg2B_  | 329  |
| YKL019W   | RAM2      | 1  | psiblast       | 1jcqA_  | 124  |
| YKL019W   | RAM2      | 2  | psiblast       | 1jcqA_  | 84   |
| YKL019W   | RAM2      | 3  | psiblast       | 1jcqA_  | 108  |
| YKL020C   | SPT23     | 1  | unassigned     | na      | 181  |
| YKL020C   | SPT23     | 2  | msa            | na      | 319  |
| YKL020C   | SPT23     | 3  | pfam           | PF01833 | 85   |
| YKL020C   | SPT23     | 4  | psiblast       | 1iknD_  | 75   |
| YKL020C   | SPT23     | 5  | psiblast       | 1iknD_  | 77   |
| YKL020C   | SPT23     | 6  | psiblast       | 1iknD_  | 62   |
| YKL020C   | SPT23     | 7  | msa            | na      | 228  |
| YKL020C   | SPT23     | 8  | unassigned     | na      | 55   |
| YKL021C   | MAK11     | 1  | psiblast       | 1gg2B_  | 104  |
| YKL021C   | MAK11     | 2  | psiblast       | 1erjA_  | 364  |
| YKL022C   | CDC16     | 1  | psiblast       | 1elwA_  | 92   |
| YKL022C   | CDC16     | 2  | unassigned     | na      | 114  |
| YKL022C   | CDC16     | 3  | psiblast       | 1hz4A_  | 96   |
| YKL022C   | CDC16     | 4  | psiblast       | 1hz4A_  | 116  |
| YKL022C   | CDC16     | 5  | psiblast       | 1fchA_  | 161  |

|           |           |   |                |         |     |
|-----------|-----------|---|----------------|---------|-----|
| YKL022C   | CDC16     | 6 | psiblast       | 1fchA_  | 68  |
| YKL022C   | CDC16     | 7 | psiblast       | 1fchA_  | 141 |
| YKL022C   | CDC16     | 8 | unassigned     | na      | 52  |
| YKL023W   | YKL023W   | 1 | psiblast       | 1i84S_  | 277 |
| YKL024C   | URA6      | 1 | psiblast       | 1uky__  | 204 |
| YKL025C   | PAN3      | 1 | unassigned     | na      | 224 |
| YKL025C   | PAN3      | 2 | psiblast       | 1a06__  | 177 |
| YKL025C   | PAN3      | 3 | psiblast       | 1a06__  | 184 |
| YKL025C   | PAN3      | 4 | psiblast       | 1dtIA_  | 94  |
| YKL026C   | GPX1      | 1 | psiblast       | 1gp1A_  | 167 |
| YKL027W   | YKL027W   | 1 | psiblast       | 1jw9B_  | 372 |
| YKL027W   | YKL027W   | 2 | unassigned     | na      | 75  |
| YKL028W   | TFA1      | 1 | pfam           | PF02002 | 219 |
| YKL028W   | TFA1      | 2 | msa            | na      | 263 |
| YKL029C   | MAE1      | 1 | msa            | na      | 97  |
| YKL029C   | MAE1      | 2 | psiblast       | 1gq2A_  | 278 |
| YKL029C   | MAE1      | 3 | psiblast       | 1gq2A_  | 294 |
| YKL030W   | YKL030W   | 1 | unassigned     | na      | 201 |
| YKL031W   | YKL031W   | 1 | unassigned     | na      | 137 |
| YKL032C   | IXR1      | 1 | msa            | na      | 121 |
| YKL032C   | IXR1      | 2 | unassigned     | na      | 52  |
| YKL032C   | IXR1      | 3 | psiblast       | 1k99A_  | 163 |
| YKL032C   | IXR1      | 4 | psiblast       | 1i11A_  | 91  |
| YKL032C   | IXR1      | 5 | psiblast       | 1cg7A_  | 84  |
| YKL032C   | IXR1      | 6 | msa            | na      | 86  |
| YKL033W   | FMP47     | 1 | fold_recogniti | 1i7wC   | 173 |
| YKL033W   | FMP47     | 2 | fold_recogniti | 1i7wC   | 109 |
| YKL033W   | FMP47     | 3 | fold_recogniti | 1i7wC   | 107 |
| YKL033W   | FMP47     | 4 | fold_recogniti | 1i7wC   | 42  |
| YKL033W   | FMP47     | 5 | fold_recogniti | 1i7wC   | 123 |
| YKL033W   | FMP47     | 6 | msa            | na      | 420 |
| YKL033W   | FMP47     | 7 | unassigned     | na      | 64  |
| YKL033W-A | YKL033W-A | 1 | fold_recogniti | 1lvhA   | 60  |
| YKL034W   | TUL1      | 1 | unassigned     | na      | 360 |
| YKL034W   | TUL1      | 2 | msa            | na      | 237 |
| YKL034W   | TUL1      | 3 | unassigned     | na      | 96  |
| YKL034W   | TUL1      | 4 | psiblast       | 1chc__  | 65  |
| YKL035W   | UGP1      | 1 | unassigned     | na      | 96  |
| YKL035W   | UGP1      | 2 | fold_recogniti | 1hv9A   | 403 |
| YKL036C   | YKL036C   | 1 | unassigned     | na      | 130 |
| YKL037W   | YKL037W   | 1 | unassigned     | na      | 118 |
| YKL038W   | RGT1      | 1 | psiblast       | 1hwtC_  | 120 |
| YKL038W   | RGT1      | 2 | msa            | na      | 350 |
| YKL038W   | RGT1      | 3 | unassigned     | na      | 700 |
| YKL039W   | PTM1      | 1 | unassigned     | na      | 70  |
| YKL039W   | PTM1      | 2 | msa            | na      | 461 |
| YKL040C   | NFU1      | 1 | msa            | na      | 145 |
| YKL040C   | NFU1      | 2 | pfam           | PF01106 | 111 |

|           |         |   |                |        |     |
|-----------|---------|---|----------------|--------|-----|
| YKL041W   | VPS24   | 1 | fold_recogniti | 1av1A  | 224 |
| YKL042W   | SPC42   | 1 | unassigned     | na     | 363 |
| YKL043W   | PHD1    | 1 | msa            | na     | 194 |
| YKL043W   | PHD1    | 2 | psiblast       | 1bm8__ | 95  |
| YKL043W   | PHD1    | 3 | unassigned     | na     | 77  |
| YKL044W   | YKL044W | 1 | unassigned     | na     | 106 |
| YKL045W   | PRI2    | 1 | msa            | na     | 139 |
| YKL045W   | PRI2    | 2 | unassigned     | na     | 81  |
| YKL045W   | PRI2    | 3 | msa            | na     | 248 |
| YKL045W   | PRI2    | 4 | unassigned     | na     | 60  |
| YKL046C   | DCW1    | 1 | fold_recogniti | 1fo2A  | 258 |
| YKL046C   | DCW1    | 2 | fold_recogniti | 1fo2A  | 191 |
| YKL047W   | YKL047W | 1 | unassigned     | na     | 516 |
| YKL048C   | ELM1    | 1 | psiblast       | 1a06__ | 225 |
| YKL048C   | ELM1    | 2 | psiblast       | 1a06__ | 218 |
| YKL048C   | ELM1    | 3 | psiblast       | 1ahr__ | 71  |
| YKL048C   | ELM1    | 4 | psiblast       | 1ahr__ | 126 |
| YKL049C   | CSE4    | 1 | psiblast       | 1eqzC_ | 137 |
| YKL050C   | YKL050C | 1 | unassigned     | na     | 72  |
| YKL050C   | YKL050C | 2 | psiblast       | 1i84S_ | 323 |
| YKL050C   | YKL050C | 3 | psiblast       | 1c1gA_ | 224 |
| YKL050C   | YKL050C | 4 | msa            | na     | 249 |
| YKL050C   | YKL050C | 5 | unassigned     | na     | 54  |
| YKL051W   | SFK1    | 1 | unassigned     | na     | 353 |
| YKL052C   | ASK1    | 1 | unassigned     | na     | 96  |
| YKL052C   | ASK1    | 2 | msa            | na     | 137 |
| YKL052C   | ASK1    | 3 | unassigned     | na     | 59  |
| YKL053C-A | MDM35   | 1 | unassigned     | na     | 86  |
| YKL053W   | YKL053W | 1 | unassigned     | na     | 124 |
| YKL054C   | DEF1    | 1 | unassigned     | na     | 176 |
| YKL054C   | DEF1    | 2 | fold_recogniti | 1l8mA  | 82  |
| YKL054C   | DEF1    | 3 | fold_recogniti | 1l8mA  | 73  |
| YKL054C   | DEF1    | 4 | fold_recogniti | 1l8mA  | 83  |
| YKL054C   | DEF1    | 5 | fold_recogniti | 1l8mA  | 70  |
| YKL054C   | DEF1    | 6 | fold_recogniti | 1deqA  | 129 |
| YKL054C   | DEF1    | 7 | unassigned     | na     | 125 |
| YKL055C   | OAR1    | 1 | psiblast       | 1edoA_ | 278 |
| YKL056C   | YKL056C | 1 | psiblast       | 1h7yA_ | 167 |
| YKL057C   | NUP120  | 1 | msa            | na     | 479 |
| YKL057C   | NUP120  | 2 | msa            | na     | 558 |
| YKL058W   | TOA2    | 1 | psiblast       | 1ytfD_ | 57  |
| YKL058W   | TOA2    | 2 | psiblast       | 1ytfD_ | 65  |
| YKL059C   | MPE1    | 1 | msa            | na     | 69  |
| YKL059C   | MPE1    | 2 | msa            | na     | 199 |
| YKL059C   | MPE1    | 3 | psiblast       | 1rmd__ | 173 |
| YKL060C   | FBA1    | 1 | psiblast       | 1dosA_ | 359 |
| YKL061W   | YKL061W | 1 | unassigned     | na     | 113 |
| YKL062W   | MSN4    | 1 | msa            | na     | 212 |

|         |         |   |                |         |     |
|---------|---------|---|----------------|---------|-----|
| YKL062W | MSN4    | 2 | msa            | na      | 137 |
| YKL062W | MSN4    | 3 | psiblast       | 1tf3A_  | 111 |
| YKL062W | MSN4    | 4 | psiblast       | 1zaaC_  | 97  |
| YKL062W | MSN4    | 5 | psiblast       | 1a1fA_  | 73  |
| YKL063C | YKL063C | 1 | unassigned     | na      | 167 |
| YKL064W | MNR2    | 1 | unassigned     | na      | 467 |
| YKL064W | MNR2    | 2 | pfam           | PF01544 | 502 |
| YKL065C | YET1    | 1 | msa            | na      | 206 |
| YKL066W | YKL066W | 1 | unassigned     | na      | 147 |
| YKL067W | YNK1    | 1 | psiblast       | 1nueA_  | 153 |
| YKL068W | NUP100  | 1 | msa            | na      | 752 |
| YKL068W | NUP100  | 2 | msa            | na      | 207 |
| YKL069W | YKL069W | 1 | psiblast       | 1f5mA_  | 61  |
| YKL069W | YKL069W | 2 | psiblast       | 1f5mA_  | 119 |
| YKL070W | YKL070W | 1 | unassigned     | na      | 169 |
| YKL071W | YKL071W | 1 | psiblast       | 1i01A_  | 256 |
| YKL072W | STB6    | 1 | unassigned     | na      | 469 |
| YKL072W | STB6    | 2 | msa            | na      | 297 |
| YKL073W | LHS1    | 1 | psiblast       | 1ba0__  | 228 |
| YKL073W | LHS1    | 2 | psiblast       | 1ba0__  | 131 |
| YKL073W | LHS1    | 3 | psiblast       | 1ba0__  | 79  |
| YKL073W | LHS1    | 4 | psiblast       | 1dkxA_  | 164 |
| YKL073W | LHS1    | 5 | psiblast       | 1dkxA_  | 107 |
| YKL073W | LHS1    | 6 | unassigned     | na      | 172 |
| YKL074C | MUD2    | 1 | msa            | na      | 392 |
| YKL074C | MUD2    | 2 | psiblast       | 1jmtA_  | 135 |
| YKL075C | YKL075C | 1 | unassigned     | na      | 450 |
| YKL076C | PSY1    | 1 | unassigned     | na      | 127 |
| YKL077W | YKL077W | 1 | unassigned     | na      | 392 |
| YKL078W | DHR2    | 1 | psiblast       | 1fuuA_  | 487 |
| YKL078W | DHR2    | 2 | unassigned     | na      | 57  |
| YKL078W | DHR2    | 3 | msa            | na      | 191 |
| YKL079W | SMY1    | 1 | psiblast       | 1gojA_  | 366 |
| YKL079W | SMY1    | 2 | psiblast       | 1i84S_  | 290 |
| YKL080W | VMA5    | 1 | pfam           | PF03223 | 392 |
| YKL081W | TEF4    | 1 | psiblast       | 1bx9A_  | 80  |
| YKL081W | TEF4    | 2 | psiblast       | 1bx9A_  | 167 |
| YKL081W | TEF4    | 3 | pfam           | PF00647 | 165 |
| YKL082C | RRP14   | 1 | msa            | na      | 219 |
| YKL082C | RRP14   | 2 | msa            | na      | 215 |
| YKL083W | YKL083W | 1 | unassigned     | na      | 204 |
| YKL084W | YKL084W | 1 | unassigned     | na      | 116 |
| YKL085W | MDH1    | 1 | psiblast       | 1mldA_  | 334 |
| YKL086W | SRX1    | 1 | pfam           | PF02195 | 127 |
| YKL087C | CYT2    | 1 | pfam           | PF01265 | 224 |
| YKL088W | YKL088W | 1 | fold_recogniti | 1c1gB   | 275 |
| YKL088W | YKL088W | 2 | psiblast       | 1e20A_  | 296 |
| YKL089W | MIF2    | 1 | fold_recogniti | 1l8mA   | 91  |



|           |         |   |                |         |     |
|-----------|---------|---|----------------|---------|-----|
| YKL089W   | MIF2    | 2 | fold_recogniti | 1l8mA   | 74  |
| YKL089W   | MIF2    | 3 | fold_recogniti | 1l8mA   | 79  |
| YKL089W   | MIF2    | 4 | fold_recogniti | 1l8mA   | 70  |
| YKL089W   | MIF2    | 5 | unassigned     | na      | 156 |
| YKL089W   | MIF2    | 6 | msa            | na      | 79  |
| YKL090W   | CUE2    | 1 | pfam           | PF02845 | 52  |
| YKL090W   | CUE2    | 2 | pfam           | PF02845 | 51  |
| YKL090W   | CUE2    | 3 | unassigned     | na      | 228 |
| YKL090W   | CUE2    | 4 | msa            | na      | 112 |
| YKL091C   | YKL091C | 1 | psiblast       | 1aua__  | 249 |
| YKL091C   | YKL091C | 2 | psiblast       | 1aua__  | 61  |
| YKL092C   | BUD2    | 1 | unassigned     | na      | 194 |
| YKL092C   | BUD2    | 2 | psiblast       | 1dqvA_  | 122 |
| YKL092C   | BUD2    | 3 | psiblast       | 1dqvA_  | 150 |
| YKL092C   | BUD2    | 4 | psiblast       | 1wer__  | 138 |
| YKL092C   | BUD2    | 5 | psiblast       | 1wer__  | 223 |
| YKL092C   | BUD2    | 6 | unassigned     | na      | 277 |
| YKL093W   | MBR1    | 1 | unassigned     | na      | 107 |
| YKL093W   | MBR1    | 2 | msa            | na      | 232 |
| YKL094W   | YJU3    | 1 | psiblast       | 1cqzA_  | 313 |
| YKL095W   | YJU2    | 1 | msa            | na      | 212 |
| YKL095W   | YJU2    | 2 | unassigned     | na      | 66  |
| YKL096W   | CWP1    | 1 | unassigned     | na      | 239 |
| YKL096W-A | CWP2    | 1 | unassigned     | na      | 92  |
| YKL097C   | YKL097C | 1 | unassigned     | na      | 136 |
| YKL098W   | YKL098W | 1 | psiblast       | 1g8pA_  | 218 |
| YKL098W   | YKL098W | 2 | psiblast       | 1g8pA_  | 139 |
| YKL099C   | UTP11   | 1 | fold_recogniti | 1c1gB   | 256 |
| YKL100C   | YKL100C | 1 | unassigned     | na      | 259 |
| YKL100C   | YKL100C | 2 | msa            | na      | 328 |
| YKL101W   | HSL1    | 1 | psiblast       | 1a06__  | 215 |
| YKL101W   | HSL1    | 2 | psiblast       | 1a06__  | 193 |
| YKL101W   | HSL1    | 3 | psiblast       | 1ahr__  | 92  |
| YKL101W   | HSL1    | 4 | psiblast       | 1ahr__  | 77  |
| YKL101W   | HSL1    | 5 | unassigned     | na      | 94  |
| YKL101W   | HSL1    | 6 | fold_recogniti | 1k83A   | 150 |
| YKL101W   | HSL1    | 7 | fold_recogniti | 1ivoA   | 176 |
| YKL101W   | HSL1    | 8 | fold_recogniti | 1ivoA   | 358 |
| YKL101W   | HSL1    | 9 | unassigned     | na      | 163 |
| YKL102C   | YKL102C | 1 | unassigned     | na      | 101 |
| YKL103C   | LAP4    | 1 | pfam           | PF02127 | 514 |
| YKL104C   | GFA1    | 1 | psiblast       | 1jxaA_  | 302 |
| YKL104C   | GFA1    | 2 | psiblast       | 1jxaA_  | 260 |
| YKL104C   | GFA1    | 3 | psiblast       | 1jxaA_  | 155 |
| YKL105C   | YKL105C | 1 | unassigned     | na      | 142 |
| YKL105C   | YKL105C | 2 | psiblast       | 1i84S_  | 359 |
| YKL105C   | YKL105C | 3 | fold_recogniti | 1l8mA   | 72  |
| YKL105C   | YKL105C | 4 | fold_recogniti | 1l8mA   | 83  |

|           |           |   |                |         |     |
|-----------|-----------|---|----------------|---------|-----|
| YKL105C   | YKL105C   | 5 | fold_recogniti | 1l8mA   | 70  |
| YKL105C   | YKL105C   | 6 | fold_recogniti | 1l8mA   | 85  |
| YKL105C   | YKL105C   | 7 | unassigned     | na      | 88  |
| YKL105C   | YKL105C   | 8 | msa            | na      | 233 |
| YKL106C-A | YKL106C-A | 1 | unassigned     | na      | 39  |
| YKL106W   | AAT1      | 1 | psiblast       | 1yaaA_  | 145 |
| YKL106W   | AAT1      | 2 | psiblast       | 1yaaA_  | 306 |
| YKL107W   | YKL107W   | 1 | psiblast       | 1ae1A_  | 309 |
| YKL108W   | SLD2      | 1 | fold_recogniti | 1ldvA   | 315 |
| YKL108W   | SLD2      | 2 | unassigned     | na      | 138 |
| YKL109W   | HAP4      | 1 | unassigned     | na      | 216 |
| YKL109W   | HAP4      | 2 | fold_recogniti | 1iu4A   | 338 |
| YKL110C   | KTI12     | 1 | psiblast       | 1ak2__  | 217 |
| YKL110C   | KTI12     | 2 | psiblast       | 1jhdA_  | 96  |
| YKL111C   | YKL111C   | 1 | unassigned     | na      | 111 |
| YKL112W   | ABF1      | 1 | unassigned     | na      | 78  |
| YKL112W   | ABF1      | 2 | fold_recogniti | 1l8mA   | 98  |
| YKL112W   | ABF1      | 3 | fold_recogniti | 1l8mA   | 69  |
| YKL112W   | ABF1      | 4 | fold_recogniti | 1l8mA   | 75  |
| YKL112W   | ABF1      | 5 | fold_recogniti | 1itwA   | 204 |
| YKL112W   | ABF1      | 6 | fold_recogniti | 1itwA   | 207 |
| YKL113C   | RAD27     | 1 | psiblast       | 1b43A_  | 296 |
| YKL113C   | RAD27     | 2 | psiblast       | 1b43A_  | 86  |
| YKL114C   | APN1      | 1 | psiblast       | 1qtwA_  | 367 |
| YKL115C   | YKL115C   | 1 | unassigned     | na      | 130 |
| YKL116C   | PRR1      | 1 | unassigned     | na      | 128 |
| YKL116C   | PRR1      | 2 | psiblast       | 1kmwC_  | 128 |
| YKL116C   | PRR1      | 3 | psiblast       | 1kmwC_  | 262 |
| YKL117W   | SBA1      | 1 | psiblast       | 1ejfA_  | 216 |
| YKL118W   | YKL118W   | 1 | unassigned     | na      | 103 |
| YKL119C   | VPH2      | 1 | msa            | na      | 215 |
| YKL120W   | OAC1      | 1 | fold_recogniti | 1is2A   | 324 |
| YKL121W   | YKL121W   | 1 | unassigned     | na      | 107 |
| YKL121W   | YKL121W   | 2 | psiblast       | 1erjA_  | 167 |
| YKL121W   | YKL121W   | 3 | psiblast       | 1scgB_  | 337 |
| YKL121W   | YKL121W   | 4 | psiblast       | 1c5kA_  | 241 |
| YKL122C   | SRP21     | 1 | unassigned     | na      | 167 |
| YKL123W   | YKL123W   | 1 | unassigned     | na      | 126 |
| YKL124W   | SSH4      | 1 | unassigned     | na      | 184 |
| YKL124W   | SSH4      | 2 | pfam           | PF00622 | 237 |
| YKL124W   | SSH4      | 3 | unassigned     | na      | 158 |
| YKL125W   | RRN3      | 1 | fold_recogniti | 1b3uA   | 272 |
| YKL125W   | RRN3      | 2 | unassigned     | na      | 232 |
| YKL125W   | RRN3      | 3 | msa            | na      | 123 |
| YKL126W   | YPK1      | 1 | unassigned     | na      | 152 |
| YKL126W   | YPK1      | 2 | psiblast       | 1a25A_  | 153 |
| YKL126W   | YPK1      | 3 | psiblast       | 1atpE_  | 256 |
| YKL126W   | YPK1      | 4 | psiblast       | 1atpE_  | 119 |

|         |         |   |            |         |     |
|---------|---------|---|------------|---------|-----|
| YKL127W | PGM1    | 1 | psiblast   | 1c47A_  | 192 |
| YKL127W | PGM1    | 2 | psiblast   | 1c47A_  | 149 |
| YKL127W | PGM1    | 3 | psiblast   | 1c47A_  | 102 |
| YKL127W | PGM1    | 4 | psiblast   | 1c47A_  | 127 |
| YKL128C | PMU1    | 1 | psiblast   | 1bif__  | 295 |
| YKL129C | MYO3    | 1 | psiblast   | 1lkxA_  | 641 |
| YKL129C | MYO3    | 2 | psiblast   | 1lkxA_  | 72  |
| YKL129C | MYO3    | 3 | psiblast   | 1wdcA_  | 63  |
| YKL129C | MYO3    | 4 | psiblast   | 1deqA_  | 321 |
| YKL129C | MYO3    | 5 | psiblast   | 2semA_  | 92  |
| YKL129C | MYO3    | 6 | unassigned | na      | 82  |
| YKL130C | SHE2    | 1 | unassigned | na      | 246 |
| YKL131W | YKL131W | 1 | unassigned | na      | 173 |
| YKL132C | RMA1    | 1 | psiblast   | 1fgs__  | 276 |
| YKL132C | RMA1    | 2 | psiblast   | 1fgs__  | 154 |
| YKL133C | YKL133C | 1 | unassigned | na      | 463 |
| YKL134C | 1-Oct   | 1 | unassigned | na      | 84  |
| YKL134C | 1-Oct   | 2 | psiblast   | 1i1iP_  | 399 |
| YKL134C | 1-Oct   | 3 | psiblast   | 1i1iP_  | 287 |
| YKL135C | APL2    | 1 | psiblast   | 1gw5B_  | 103 |
| YKL135C | APL2    | 2 | psiblast   | 1gw5B_  | 107 |
| YKL135C | APL2    | 3 | psiblast   | 1gw5B_  | 192 |
| YKL135C | APL2    | 4 | psiblast   | 1gw5B_  | 95  |
| YKL135C | APL2    | 5 | psiblast   | 1gw5B_  | 136 |
| YKL135C | APL2    | 6 | unassigned | na      | 93  |
| YKL136W | YKL136W | 1 | unassigned | na      | 132 |
| YKL137W | YKL137W | 1 | unassigned | na      | 103 |
| YKL138C | MRPL31  | 1 | unassigned | na      | 131 |
| YKL139W | CTK1    | 1 | unassigned | na      | 144 |
| YKL139W | CTK1    | 2 | psiblast   | 1lfnA_  | 97  |
| YKL139W | CTK1    | 3 | psiblast   | 1lfnA_  | 287 |
| YKL140W | TGL1    | 1 | psiblast   | 1k8qA_  | 463 |
| YKL140W | TGL1    | 2 | unassigned | na      | 85  |
| YKL141W | SDH3    | 1 | unassigned | na      | 53  |
| YKL141W | SDH3    | 2 | pfam       | PF01127 | 145 |
| YKL142W | MRP8    | 1 | unassigned | na      | 219 |
| YKL143W | LTV1    | 1 | msa        | na      | 239 |
| YKL143W | LTV1    | 2 | unassigned | na      | 224 |
| YKL144C | RPC25   | 1 | psiblast   | 1go3E_  | 77  |
| YKL144C | RPC25   | 2 | psiblast   | 1go3E_  | 135 |
| YKL145W | RPT1    | 1 | psiblast   | 1e32A_  | 121 |
| YKL145W | RPT1    | 2 | psiblast   | 1e32A_  | 84  |
| YKL145W | RPT1    | 3 | psiblast   | 1e32A_  | 174 |
| YKL145W | RPT1    | 4 | psiblast   | 1e32A_  | 88  |
| YKL146W | AVT3    | 1 | msa        | na      | 282 |
| YKL146W | AVT3    | 2 | pfam       | PF01490 | 410 |
| YKL147C | YKL147C | 1 | unassigned | na      | 205 |
| YKL148C | SDH1    | 1 | psiblast   | 1kf6A_  | 355 |

|           |           |   |                |         |     |
|-----------|-----------|---|----------------|---------|-----|
| YKL148C   | SDH1      | 2 | psiblast       | 1kf6A_  | 285 |
| YKL149C   | DBR1      | 1 | fold_recogniti | 1kbpA   | 260 |
| YKL149C   | DBR1      | 2 | msa            | na      | 145 |
| YKL150W   | MCR1      | 1 | psiblast       | 1ib0A_  | 148 |
| YKL150W   | MCR1      | 2 | psiblast       | 1ib0A_  | 154 |
| YKL151C   | YKL151C   | 1 | psiblast       | 1IljA_  | 337 |
| YKL152C   | GPM1      | 1 | psiblast       | 1bq3D_  | 247 |
| YKL153W   | YKL153W   | 1 | unassigned     | na      | 169 |
| YKL154W   | SRP102    | 1 | psiblast       | 1fzqA_  | 244 |
| YKL155C   | RSM22     | 1 | msa            | na      | 491 |
| YKL155C   | RSM22     | 2 | unassigned     | na      | 137 |
| YKL156W   | RPS27A    | 1 | pfam           | PF01667 | 82  |
| YKL157W   | APE2      | 1 | psiblast       | 1hs6A_  | 210 |
| YKL157W   | APE2      | 2 | psiblast       | 1hs6A_  | 93  |
| YKL157W   | APE2      | 3 | psiblast       | 1hs6A_  | 202 |
| YKL157W   | APE2      | 4 | fold_recogniti | 1gw5B   | 183 |
| YKL157W   | APE2      | 5 | fold_recogniti | 1gw5B   | 156 |
| YKL158W   | 3710      | 1 | unassigned     | na      | 100 |
| YKL159C   | RCN1      | 1 | unassigned     | na      | 211 |
| YKL160W   | ELF1      | 1 | unassigned     | na      | 145 |
| YKL161C   | YKL161C   | 1 | psiblast       | 1gol__  | 191 |
| YKL161C   | YKL161C   | 2 | psiblast       | 1gol__  | 242 |
| YKL162C   | YKL162C   | 1 | unassigned     | na      | 402 |
| YKL162C-A | YKL162C-A | 1 | unassigned     | na      | 50  |
| YKL163W   | PIR3      | 1 | msa            | na      | 207 |
| YKL163W   | PIR3      | 2 | msa            | na      | 118 |
| YKL164C   | PIR1      | 1 | fold_recogniti | 1kapP   | 128 |
| YKL164C   | PIR1      | 2 | fold_recogniti | 1kapP   | 77  |
| YKL164C   | PIR1      | 3 | fold_recogniti | 1kapP   | 136 |
| YKL165C   | MCD4      | 1 | psiblast       | 1e1zP_  | 383 |
| YKL165C   | MCD4      | 2 | msa            | na      | 152 |
| YKL165C   | MCD4      | 3 | unassigned     | na      | 384 |
| YKL165C-A | YKL165C-A | 1 | unassigned     | na      | 4   |
| YKL166C   | TPK3      | 1 | unassigned     | na      | 78  |
| YKL166C   | TPK3      | 2 | psiblast       | 1fotA_  | 112 |
| YKL166C   | TPK3      | 3 | psiblast       | 1fotA_  | 208 |
| YKL167C   | MRP49     | 1 | unassigned     | na      | 137 |
| YKL168C   | KKQ8      | 1 | fold_recogniti | 1ldvA   | 223 |
| YKL168C   | KKQ8      | 2 | unassigned     | na      | 146 |
| YKL168C   | KKQ8      | 3 | psiblast       | 1a06__  | 159 |
| YKL168C   | KKQ8      | 4 | psiblast       | 1a06__  | 206 |
| YKL169C   | YKL169C   | 1 | unassigned     | na      | 127 |
| YKL170W   | MRPL38    | 1 | psiblast       | 487dM_  | 138 |
| YKL171W   | YKL171W   | 1 | unassigned     | na      | 401 |
| YKL171W   | YKL171W   | 2 | psiblast       | 1a06__  | 172 |
| YKL171W   | YKL171W   | 3 | psiblast       | 1a06__  | 208 |
| YKL171W   | YKL171W   | 4 | msa            | na      | 147 |
| YKL172W   | EBP2      | 1 | fold_recogniti | 1l8mA   | 125 |

|         |         |   |                |         |     |
|---------|---------|---|----------------|---------|-----|
| YKL172W | EBP2    | 2 | fold_recogniti | 1l8mA   | 73  |
| YKL172W | EBP2    | 3 | fold_recogniti | 1l8mA   | 79  |
| YKL172W | EBP2    | 4 | fold_recogniti | 1l8mA   | 70  |
| YKL172W | EBP2    | 5 | unassigned     | na      | 80  |
| YKL173W | SNU114  | 1 | unassigned     | na      | 113 |
| YKL173W | SNU114  | 2 | psiblast       | 1efgA_  | 330 |
| YKL173W | SNU114  | 3 | psiblast       | 1efgA_  | 146 |
| YKL173W | SNU114  | 4 | psiblast       | 1efgA_  | 220 |
| YKL173W | SNU114  | 5 | psiblast       | 1efgA_  | 199 |
| YKL174C | YKL174C | 1 | pfam           | PF00324 | 535 |
| YKL174C | YKL174C | 2 | unassigned     | na      | 83  |
| YKL175W | ZRT3    | 1 | fold_recogniti | 1k83A   | 312 |
| YKL175W | ZRT3    | 2 | pfam           | PF02535 | 191 |
| YKL176C | LST4    | 1 | msa            | na      | 322 |
| YKL176C | LST4    | 2 | unassigned     | na      | 191 |
| YKL176C | LST4    | 3 | fold_recogniti | 1f1kA   | 315 |
| YKL177W | YKL177W | 1 | unassigned     | na      | 112 |
| YKL178C | STE3    | 1 | pfam           | PF02076 | 332 |
| YKL178C | STE3    | 2 | unassigned     | na      | 138 |
| YKL179C | COY1    | 1 | psiblast       | 1i84S_  | 359 |
| YKL179C | COY1    | 2 | msa            | na      | 320 |
| YKL180W | RPL17A  | 1 | psiblast       | 1k5yN_  | 184 |
| YKL181W | PRS1    | 1 | psiblast       | 1dkrA_  | 167 |
| YKL181W | PRS1    | 2 | psiblast       | 1dkrA_  | 147 |
| YKL181W | PRS1    | 3 | psiblast       | 1ao0A_  | 113 |
| YKL182W | FAS1    | 1 | unassigned     | na      | 138 |
| YKL182W | FAS1    | 2 | msa            | na      | 414 |
| YKL182W | FAS1    | 3 | unassigned     | na      | 93  |
| YKL182W | FAS1    | 4 | psiblast       | 1eepA_  | 194 |
| YKL182W | FAS1    | 5 | unassigned     | na      | 437 |
| YKL182W | FAS1    | 6 | psiblast       | 1b3nA_  | 370 |
| YKL182W | FAS1    | 7 | unassigned     | na      | 67  |
| YKL182W | FAS1    | 8 | psiblast       | 1mla__  | 338 |
| YKL183W | LOT5    | 1 | unassigned     | na      | 306 |
| YKL184W | SPE1    | 1 | psiblast       | 7odcA_  | 104 |
| YKL184W | SPE1    | 2 | psiblast       | 7odcA_  | 232 |
| YKL184W | SPE1    | 3 | psiblast       | 7odcA_  | 130 |
| YKL185W | ASH1    | 1 | unassigned     | na      | 236 |
| YKL185W | ASH1    | 2 | msa            | na      | 239 |
| YKL185W | ASH1    | 3 | psiblast       | 4gatA_  | 113 |
| YKL186C | MTR2    | 1 | unassigned     | na      | 184 |
| YKL187C | YKL187C | 1 | unassigned     | na      | 178 |
| YKL187C | YKL187C | 2 | msa            | na      | 189 |
| YKL187C | YKL187C | 3 | unassigned     | na      | 74  |
| YKL187C | YKL187C | 4 | msa            | na      | 248 |
| YKL187C | YKL187C | 5 | unassigned     | na      | 61  |
| YKL188C | PXA2    | 1 | unassigned     | na      | 85  |
| YKL188C | PXA2    | 2 | psiblast       | 1jsqA_  | 342 |

|         |         |      |                  |         |     |
|---------|---------|------|------------------|---------|-----|
| YKL188C | PXA2    |      | 3 psiblast       | 1jsqA_  | 373 |
| YKL188C | PXA2    |      | 4 unassigned     | na      | 53  |
| YKL189W | HYM1    |      | 1 fold_recogniti | 1ee5A   | 122 |
| YKL189W | HYM1    |      | 2 fold_recogniti | 1ee5A   | 122 |
| YKL189W | HYM1    |      | 3 fold_recogniti | 1ee5A   | 155 |
| YKL190W | CNB1    |      | 1 psiblast       | 1auiB_  | 86  |
| YKL190W | CNB1    |      | 2 psiblast       | 1auiB_  | 89  |
| YKL191W | DPH2    |      | 1 pfam           | PF01866 | 423 |
| YKL191W | DPH2    |      | 2 unassigned     | na      | 111 |
| YKL192C | ACP1    |      | 1 psiblast       | 1acp__  | 125 |
| YKL193C | SDS22   |      | 1 psiblast       | 1k5dC_  | 111 |
| YKL193C | SDS22   |      | 2 psiblast       | 1h6uA_  | 227 |
| YKL194C | MST1    |      | 1 psiblast       | 1qf6A_  | 340 |
| YKL194C | MST1    |      | 2 psiblast       | 1qf6A_  | 122 |
| YKL195W | FMP15   |      | 1 msa            | na      | 427 |
| YKL196C | YKT6    |      | 1 psiblast       | 1h8mA_  | 137 |
| YKL196C | YKT6    |      | 2 psiblast       | 1gl2A_  | 63  |
| YKL197C | PEX1    |      | 1 fold_recogniti | 1cz4A   | 199 |
| YKL197C | PEX1    |      | 2 psiblast       | 1e32A_  | 118 |
| YKL197C | PEX1    |      | 3 psiblast       | 1e32A_  | 97  |
| YKL197C | PEX1    |      | 4 psiblast       | 1e32A_  | 188 |
| YKL197C | PEX1    |      | 5 psiblast       | 1e32A_  | 87  |
| YKL197C | PEX1    |      | 6 psiblast       | 1g4aE_  | 132 |
| YKL197C | PEX1    |      | 7 fold_recogniti | 1hqca   | 149 |
| YKL197C | PEX1    |      | 8 unassigned     | na      | 73  |
| YKL198C | PTK1    |      | 1 unassigned     | na      | 159 |
| YKL198C | PTK1    |      | 2 psiblast       | 1giiA_  | 112 |
| YKL198C | PTK1    |      | 3 psiblast       | 1giiA_  | 128 |
| YKL199C |         | 3753 | 1 psiblast       | 1a06__  | 159 |
| YKL199C |         | 3753 | 2 msa            | na      | 120 |
| YKL201C | MNN4    |      | 1 msa            | na      | 164 |
| YKL201C | MNN4    |      | 2 unassigned     | na      | 93  |
| YKL201C | MNN4    |      | 3 msa            | na      | 432 |
| YKL201C | MNN4    |      | 4 psiblast       | 1i84S_  | 433 |
| YKL201C | MNN4    |      | 5 unassigned     | na      | 56  |
| YKL202W | YKL202W |      | 1 unassigned     | na      | 193 |
| YKL203C | TOR2    |      | 1 unassigned     | na      | 75  |
| YKL203C | TOR2    |      | 2 fold_recogniti | 1b3uA   | 334 |
| YKL203C | TOR2    |      | 3 unassigned     | na      | 154 |
| YKL203C | TOR2    |      | 4 msa            | na      | 451 |
| YKL203C | TOR2    |      | 5 unassigned     | na      | 80  |
| YKL203C | TOR2    |      | 6 msa            | na      | 136 |
| YKL203C | TOR2    |      | 7 unassigned     | na      | 79  |
| YKL203C | TOR2    |      | 8 msa            | na      | 292 |
| YKL203C | TOR2    |      | 9 msa            | na      | 339 |
| YKL203C | TOR2    |      | 10 psiblast      | 1aueA_  | 143 |
| YKL203C | TOR2    |      | 11 msa           | na      | 390 |
| YKL204W | EAP1    |      | 1 unassigned     | na      | 178 |

|         |         |   |                |         |     |
|---------|---------|---|----------------|---------|-----|
| YKL204W | EAP1    | 2 | fold_recogniti | 1ei3A   | 314 |
| YKL204W | EAP1    | 3 | fold_recogniti | 1ldvA   | 140 |
| YKL205W | LOS1    | 1 | msa            | na      | 434 |
| YKL205W | LOS1    | 2 | unassigned     | na      | 82  |
| YKL205W | LOS1    | 3 | msa            | na      | 584 |
| YKL206C | YKL206C | 1 | unassigned     | na      | 267 |
| YKL207W | YKL207W | 1 | unassigned     | na      | 132 |
| YKL207W | YKL207W | 2 | msa            | na      | 128 |
| YKL208W | CBT1    | 1 | unassigned     | na      | 271 |
| YKL209C | STE6    | 1 | fold_recogniti | 1i84S   | 120 |
| YKL209C | STE6    | 2 | fold_recogniti | 1i84S   | 223 |
| YKL209C | STE6    | 3 | psiblast       | 1l2tA_  | 296 |
| YKL209C | STE6    | 4 | unassigned     | na      | 56  |
| YKL209C | STE6    | 5 | psiblast       | 1jsqA_  | 305 |
| YKL209C | STE6    | 6 | psiblast       | 1jsqA_  | 290 |
| YKL210W | UBA1    | 1 | psiblast       | 1jw9B_  | 306 |
| YKL210W | UBA1    | 2 | unassigned     | na      | 102 |
| YKL210W | UBA1    | 3 | fold_recogniti | 1eq2A   | 212 |
| YKL210W | UBA1    | 4 | msa            | na      | 130 |
| YKL210W | UBA1    | 5 | unassigned     | na      | 63  |
| YKL210W | UBA1    | 6 | msa            | na      | 211 |
| YKL211C | TRP3    | 1 | msa            | na      | 252 |
| YKL211C | TRP3    | 2 | psiblast       | 1igs__  | 232 |
| YKL212W | SAC1    | 1 | pfam           | PF02383 | 375 |
| YKL212W | SAC1    | 2 | msa            | na      | 248 |
| YKL213C | DOA1    | 1 | psiblast       | 1erjA_  | 89  |
| YKL213C | DOA1    | 2 | psiblast       | 1gxrA_  | 304 |
| YKL213C | DOA1    | 3 | psiblast       | 1k8kC_  | 98  |
| YKL213C | DOA1    | 4 | unassigned     | na      | 224 |
| YKL214C | YRA2    | 1 | psiblast       | 1cvjA_  | 203 |
| YKL215C | YKL215C | 1 | pfam           | PF01968 | 664 |
| YKL215C | YKL215C | 2 | unassigned     | na      | 77  |
| YKL215C | YKL215C | 3 | pfam           | PF02538 | 545 |
| YKL216W | URA1    | 1 | psiblast       | 1dorA_  | 314 |
| YKL217W | JEN1    | 1 | unassigned     | na      | 86  |
| YKL217W | JEN1    | 2 | psiblast       | 1ja5A_  | 430 |
| YKL217W | JEN1    | 3 | psiblast       | 1ja5A_  | 100 |
| YKL218C | YKL218C | 1 | psiblast       | 1tdj__  | 131 |
| YKL218C | YKL218C | 2 | psiblast       | 1tdj__  | 195 |
| YKL219W | COS9    | 1 | msa            | na      | 89  |
| YKL219W | COS9    | 2 | pfam           | PF00674 | 110 |
| YKL219W | COS9    | 3 | unassigned     | na      | 73  |
| YKL219W | COS9    | 4 | pfam           | PF00674 | 135 |
| YKL220C | FRE2    | 1 | msa            | na      | 218 |
| YKL220C | FRE2    | 2 | msa            | na      | 126 |
| YKL220C | FRE2    | 3 | unassigned     | na      | 61  |
| YKL220C | FRE2    | 4 | psiblast       | 1cnf__  | 123 |
| YKL220C | FRE2    | 5 | psiblast       | 1cnf__  | 183 |

|         |         |   |                |         |     |
|---------|---------|---|----------------|---------|-----|
| YKL221W | MCH2    | 1 | unassigned     | na      | 76  |
| YKL221W | MCH2    | 2 | psiblast       | 1ja5A_  | 397 |
| YKL222C | YKL222C | 1 | psiblast       | 1hwtD_  | 95  |
| YKL222C | YKL222C | 2 | unassigned     | na      | 113 |
| YKL222C | YKL222C | 3 | msa            | na      | 244 |
| YKL222C | YKL222C | 4 | unassigned     | na      | 66  |
| YKL222C | YKL222C | 5 | msa            | na      | 187 |
| YKL223W | YKL223W | 1 | unassigned     | na      | 110 |
| YKL224C | YKL224C | 1 | pfam           | PF00660 | 123 |
| YKL225W | YKL225W | 1 | unassigned     | na      | 115 |
| YKR001C | VPS1    | 1 | psiblast       | 1jwyB_  | 356 |
| YKR001C | VPS1    | 2 | pfam           | PF01031 | 227 |
| YKR001C | VPS1    | 3 | pfam           | PF02212 | 121 |
| YKR002W | PAP1    | 1 | psiblast       | 1fa0A_  | 201 |
| YKR002W | PAP1    | 2 | psiblast       | 1fa0A_  | 367 |
| YKR003W | OSH6    | 1 | pfam           | PF01237 | 448 |
| YKR004C | ECM9    | 1 | unassigned     | na      | 292 |
| YKR005C | YKR005C | 1 | fold_recogniti | 1l2qA   | 334 |
| YKR005C | YKR005C | 2 | unassigned     | na      | 113 |
| YKR006C | MRPL13  | 1 | unassigned     | na      | 275 |
| YKR007W | MEH1    | 1 | unassigned     | na      | 184 |
| YKR008W | RSC4    | 1 | pfam           | PF00439 | 163 |
| YKR008W | RSC4    | 2 | psiblast       | 1e6iA_  | 175 |
| YKR008W | RSC4    | 3 | msa            | na      | 120 |
| YKR008W | RSC4    | 4 | unassigned     | na      | 167 |
| YKR009C | FOX2    | 1 | psiblast       | 1cwuA_  | 258 |
| YKR009C | FOX2    | 2 | unassigned     | na      | 56  |
| YKR009C | FOX2    | 3 | psiblast       | 1edoA_  | 282 |
| YKR009C | FOX2    | 4 | msa            | na      | 103 |
| YKR009C | FOX2    | 5 | unassigned     | na      | 58  |
| YKR009C | FOX2    | 6 | msa            | na      | 143 |
| YKR010C | TOF2    | 1 | msa            | na      | 241 |
| YKR010C | TOF2    | 2 | unassigned     | na      | 530 |
| YKR011C | YKR011C | 1 | unassigned     | na      | 131 |
| YKR011C | YKR011C | 2 | msa            | na      | 222 |
| YKR012C | YKR012C | 1 | unassigned     | na      | 125 |
| YKR013W | PRY2    | 1 | fold_recogniti | 1k83A   | 189 |
| YKR013W | PRY2    | 2 | psiblast       | 1cfe__  | 140 |
| YKR014C | YPT52   | 1 | psiblast       | 1huqA_  | 234 |
| YKR015C | YKR015C | 1 | msa            | na      | 111 |
| YKR015C | YKR015C | 2 | unassigned     | na      | 163 |
| YKR015C | YKR015C | 3 | msa            | na      | 192 |
| YKR015C | YKR015C | 4 | unassigned     | na      | 102 |
| YKR016W | FMP13   | 1 | psiblast       | 1i84S_  | 377 |
| YKR016W | FMP13   | 2 | msa            | na      | 163 |
| YKR017C | YKR017C | 1 | unassigned     | na      | 154 |
| YKR017C | YKR017C | 2 | psiblast       | 1rmd__  | 139 |
| YKR017C | YKR017C | 3 | unassigned     | na      | 93  |



|           |         |   |                |        |     |
|-----------|---------|---|----------------|--------|-----|
| YKR017C   | YKR017C | 4 | msa            | na     | 165 |
| YKR018C   | YKR018C | 1 | msa            | na     | 183 |
| YKR018C   | YKR018C | 2 | unassigned     | na     | 180 |
| YKR018C   | YKR018C | 3 | fold_recogniti | 1hz4A  | 93  |
| YKR018C   | YKR018C | 4 | fold_recogniti | 1hz4A  | 120 |
| YKR018C   | YKR018C | 5 | fold_recogniti | 1hz4A  | 149 |
| YKR019C   | IRS4    | 1 | unassigned     | na     | 474 |
| YKR019C   | IRS4    | 2 | psiblast       | 1c07A_ | 141 |
| YKR020W   | VPS51   | 1 | unassigned     | na     | 164 |
| YKR021W   | YKR021W | 1 | unassigned     | na     | 146 |
| YKR021W   | YKR021W | 2 | psiblast       | 1jsyA_ | 232 |
| YKR021W   | YKR021W | 3 | psiblast       | 1jsyA_ | 194 |
| YKR021W   | YKR021W | 4 | msa            | na     | 157 |
| YKR021W   | YKR021W | 5 | unassigned     | na     | 186 |
| YKR022C   | YKR022C | 1 | unassigned     | na     | 322 |
| YKR023W   | YKR023W | 1 | msa            | na     | 118 |
| YKR023W   | YKR023W | 2 | msa            | na     | 227 |
| YKR023W   | YKR023W | 3 | unassigned     | na     | 185 |
| YKR024C   | DBP7    | 1 | unassigned     | na     | 101 |
| YKR024C   | DBP7    | 2 | psiblast       | 1hv8A_ | 284 |
| YKR024C   | DBP7    | 3 | psiblast       | 1hv8A_ | 196 |
| YKR024C   | DBP7    | 4 | psiblast       | 1d2mA_ | 161 |
| YKR025W   | RPC37   | 1 | msa            | na     | 282 |
| YKR026C   | GCN3    | 1 | fold_recogniti | 2ffhA  | 234 |
| YKR026C   | GCN3    | 2 | fold_recogniti | 1m0sA  | 71  |
| YKR027W   | FMP50   | 1 | msa            | na     | 419 |
| YKR027W   | FMP50   | 2 | unassigned     | na     | 93  |
| YKR027W   | FMP50   | 3 | msa            | na     | 253 |
| YKR028W   | SAP190  | 1 | unassigned     | na     | 88  |
| YKR028W   | SAP190  | 2 | msa            | na     | 489 |
| YKR028W   | SAP190  | 3 | msa            | na     | 193 |
| YKR028W   | SAP190  | 4 | msa            | na     | 233 |
| YKR028W   | SAP190  | 5 | unassigned     | na     | 95  |
| YKR029C   | SET3    | 1 | unassigned     | na     | 110 |
| YKR029C   | SET3    | 2 | psiblast       | 1fp0A_ | 105 |
| YKR029C   | SET3    | 3 | msa            | na     | 283 |
| YKR029C   | SET3    | 4 | unassigned     | na     | 253 |
| YKR030W   | GMH1    | 1 | unassigned     | na     | 273 |
| YKR031C   | SPO14   | 1 | unassigned     | na     | 178 |
| YKR031C   | SPO14   | 2 | msa            | na     | 208 |
| YKR031C   | SPO14   | 3 | unassigned     | na     | 286 |
| YKR031C   | SPO14   | 4 | psiblast       | 1f0iA_ | 532 |
| YKR031C   | SPO14   | 5 | unassigned     | na     | 479 |
| YKR032W   | YKR032W | 1 | unassigned     | na     | 104 |
| YKR033C   | YKR033C | 1 | unassigned     | na     | 141 |
| YKR034W   | DAL80   | 1 | psiblast       | 4gatA_ | 95  |
| YKR034W   | DAL80   | 2 | unassigned     | na     | 174 |
| YKR035W-A | DID2    | 1 | fold_recogniti | 1cunA  | 80  |

|           |         |   |                |         |     |
|-----------|---------|---|----------------|---------|-----|
| YKR035W-A | DID2    | 2 | fold_recogniti | 1cunA   | 124 |
| YKR036C   | CAF4    | 1 | unassigned     | na      | 268 |
| YKR036C   | CAF4    | 2 | psiblast       | 1gg2B_  | 391 |
| YKR037C   | SPC34   | 1 | unassigned     | na      | 295 |
| YKR038C   | KAE1    | 1 | fold_recogniti | 1huxA   | 211 |
| YKR038C   | KAE1    | 2 | fold_recogniti | 1huxA   | 210 |
| YKR039W   | GAP1    | 1 | unassigned     | na      | 70  |
| YKR039W   | GAP1    | 2 | pfam           | PF00324 | 532 |
| YKR040C   | YKR040C | 1 | unassigned     | na      | 167 |
| YKR041W   | YKR041W | 1 | msa            | na      | 167 |
| YKR041W   | YKR041W | 2 | unassigned     | na      | 83  |
| YKR042W   | UTH1    | 1 | unassigned     | na      | 75  |
| YKR042W   | UTH1    | 2 | fold_recogniti | 1jx5A   | 375 |
| YKR043C   | YKR043C | 1 | psiblast       | 1bq3D_  | 271 |
| YKR044W   | UIP5    | 1 | psiblast       | 1gv9A_  | 367 |
| YKR044W   | UIP5    | 2 | unassigned     | na      | 76  |
| YKR045C   | YKR045C | 1 | unassigned     | na      | 191 |
| YKR046C   | PET10   | 1 | unassigned     | na      | 283 |
| YKR047W   | YKR047W | 1 | unassigned     | na      | 101 |
| YKR048C   | NAP1    | 1 | unassigned     | na      | 81  |
| YKR048C   | NAP1    | 2 | pfam           | PF00956 | 336 |
| YKR049C   | FMP46   | 1 | unassigned     | na      | 133 |
| YKR050W   | TRK2    | 1 | unassigned     | na      | 95  |
| YKR050W   | TRK2    | 2 | msa            | na      | 259 |
| YKR050W   | TRK2    | 3 | pfam           | PF02386 | 535 |
| YKR051W   | YKR051W | 1 | pfam           | PF03619 | 317 |
| YKR051W   | YKR051W | 2 | unassigned     | na      | 101 |
| YKR052C   | MRS4    | 1 | fold_recogniti | 1is2A   | 304 |
| YKR053C   | YSR3    | 1 | unassigned     | na      | 89  |
| YKR053C   | YSR3    | 2 | psiblast       | 1d2tA_  | 177 |
| YKR053C   | YSR3    | 3 | unassigned     | na      | 138 |
| YKR055W   | RHO4    | 1 | unassigned     | na      | 62  |
| YKR055W   | RHO4    | 2 | psiblast       | 1lb1B_  | 229 |
| YKR056W   | TRM2    | 1 | unassigned     | na      | 156 |
| YKR056W   | TRM2    | 2 | pfam           | PF01938 | 84  |
| YKR056W   | TRM2    | 3 | msa            | na      | 117 |
| YKR056W   | TRM2    | 4 | unassigned     | na      | 74  |
| YKR056W   | TRM2    | 5 | psiblast       | 1g6q1_  | 186 |
| YKR057W   | RPS21A  | 1 | pfam           | PF01249 | 87  |
| YKR058W   | GLG1    | 1 | psiblast       | 1lIOA_  | 205 |
| YKR058W   | GLG1    | 2 | fold_recogniti | 1l8mA   | 71  |
| YKR058W   | GLG1    | 3 | fold_recogniti | 1l8mA   | 78  |
| YKR058W   | GLG1    | 4 | fold_recogniti | 1l8mA   | 69  |
| YKR058W   | GLG1    | 5 | fold_recogniti | 1l8mA   | 57  |
| YKR060W   | UTP30   | 1 | psiblast       | 1eg0N_  | 179 |
| YKR060W   | UTP30   | 2 | psiblast       | 1eg0N_  | 95  |
| YKR061W   | KTR2    | 1 | pfam           | PF01793 | 425 |
| YKR062W   | TFA2    | 1 | unassigned     | na      | 96  |

|         |         |   |                |         |     |
|---------|---------|---|----------------|---------|-----|
| YKR062W | TFA2    | 2 | psiblast       | 1d8jA_  | 91  |
| YKR062W | TFA2    | 3 | unassigned     | na      | 141 |
| YKR063C | LAS1    | 1 | fold_recogniti | 1n1bA   | 219 |
| YKR063C | LAS1    | 2 | fold_recogniti | 1n1bA   | 142 |
| YKR063C | LAS1    | 3 | unassigned     | na      | 141 |
| YKR064W | YKR064W | 1 | psiblast       | 1qp9A_  | 118 |
| YKR064W | YKR064W | 2 | unassigned     | na      | 122 |
| YKR064W | YKR064W | 3 | msa            | na      | 267 |
| YKR064W | YKR064W | 4 | unassigned     | na      | 356 |
| YKR065C | FMP18   | 1 | unassigned     | na      | 197 |
| YKR066C | CCP1    | 1 | psiblast       | 2cyp__  | 243 |
| YKR066C | CCP1    | 2 | psiblast       | 2cyp__  | 118 |
| YKR067W | GPT2    | 1 | fold_recogniti | 1k30A   | 398 |
| YKR067W | GPT2    | 2 | unassigned     | na      | 231 |
| YKR067W | GPT2    | 3 | msa            | na      | 114 |
| YKR068C | BET3    | 1 | unassigned     | na      | 193 |
| YKR069W | MET1    | 1 | psiblast       | 1kyqA_  | 216 |
| YKR069W | MET1    | 2 | unassigned     | na      | 105 |
| YKR069W | MET1    | 3 | psiblast       | 2cbf__  | 120 |
| YKR069W | MET1    | 4 | psiblast       | 2cbf__  | 152 |
| YKR070W | YKR070W | 1 | fold_recogniti | 1mhsA   | 181 |
| YKR070W | YKR070W | 2 | psiblast       | 1qq6A_  | 171 |
| YKR071C | DRE2    | 1 | unassigned     | na      | 183 |
| YKR071C | DRE2    | 2 | msa            | na      | 165 |
| YKR072C | SIS2    | 1 | msa            | na      | 283 |
| YKR072C | SIS2    | 2 | psiblast       | 1e20A_  | 279 |
| YKR073C | YKR073C | 1 | unassigned     | na      | 106 |
| YKR074W | YKR074W | 1 | unassigned     | na      | 155 |
| YKR075C | YKR075C | 1 | msa            | na      | 197 |
| YKR075C | YKR075C | 2 | unassigned     | na      | 110 |
| YKR076W | ECM4    | 1 | fold_recogniti | 1eemA   | 198 |
| YKR076W | ECM4    | 2 | fold_recogniti | 1eemA   | 172 |
| YKR077W | YKR077W | 1 | unassigned     | na      | 363 |
| YKR078W | YKR078W | 1 | fold_recogniti | 1h6hA   | 253 |
| YKR078W | YKR078W | 2 | msa            | na      | 102 |
| YKR078W | YKR078W | 3 | fold_recogniti | 1i84S   | 230 |
| YKR079C | YKR079C | 1 | fold_recogniti | 1qh5A   | 204 |
| YKR079C | YKR079C | 2 | fold_recogniti | 1qh5A   | 104 |
| YKR079C | YKR079C | 3 | unassigned     | na      | 148 |
| YKR079C | YKR079C | 4 | psiblast       | 1e5dA_  | 183 |
| YKR079C | YKR079C | 5 | msa            | na      | 199 |
| YKR080W | MTD1    | 1 | psiblast       | 1edzA_  | 190 |
| YKR080W | MTD1    | 2 | psiblast       | 1edzA_  | 130 |
| YKR081C | RPF2    | 1 | pfam           | PF03679 | 262 |
| YKR081C | RPF2    | 2 | unassigned     | na      | 82  |
| YKR082W | NUP133  | 1 | unassigned     | na      | 637 |
| YKR082W | NUP133  | 2 | msa            | na      | 437 |
| YKR082W | NUP133  | 3 | unassigned     | na      | 83  |

|         |         |   |                |         |      |
|---------|---------|---|----------------|---------|------|
| YKR083C | DAD2    | 1 | unassigned     | na      | 133  |
| YKR084C | HBS1    | 1 | msa            | na      | 152  |
| YKR084C | HBS1    | 2 | psiblast       | 1jnyA_  | 241  |
| YKR084C | HBS1    | 3 | psiblast       | 1jnyA_  | 107  |
| YKR084C | HBS1    | 4 | psiblast       | 1jnyA_  | 111  |
| YKR085C | MRPL20  | 1 | unassigned     | na      | 195  |
| YKR086W | PRP16   | 1 | msa            | na      | 300  |
| YKR086W | PRP16   | 2 | psiblast       | 1fuuA_  | 447  |
| YKR086W | PRP16   | 3 | unassigned     | na      | 73   |
| YKR086W | PRP16   | 4 | msa            | na      | 251  |
| YKR087C | OMA1    | 1 | fold_recogniti | 1qu7A   | 314  |
| YKR088C | TVP38   | 1 | fold_recogniti | 1hu3A   | 148  |
| YKR088C | TVP38   | 2 | msa            | na      | 189  |
| YKR089C | STC1    | 1 | unassigned     | na      | 112  |
| YKR089C | STC1    | 2 | msa            | na      | 147  |
| YKR089C | STC1    | 3 | pfam           | PF01734 | 246  |
| YKR089C | STC1    | 4 | msa            | na      | 267  |
| YKR089C | STC1    | 5 | unassigned     | na      | 138  |
| YKR090W | PXL1    | 1 | fold_recogniti | 1m2vB   | 191  |
| YKR090W | PXL1    | 2 | msa            | na      | 228  |
| YKR090W | PXL1    | 3 | fold_recogniti | 1k83A   | 132  |
| YKR090W | PXL1    | 4 | psiblast       | 1b8tA_  | 66   |
| YKR090W | PXL1    | 5 | psiblast       | 1b8tA_  | 89   |
| YKR091W | SRL3    | 1 | unassigned     | na      | 152  |
| YKR092C | SRP40   | 1 | psiblast       | 1deqA_  | 198  |
| YKR092C | SRP40   | 2 | fold_recogniti | 1ldvA   | 208  |
| YKR093W | PTR2    | 1 | psiblast       | 1ja5A_  | 516  |
| YKR093W | PTR2    | 2 | psiblast       | 1ja5A_  | 85   |
| YKR095W | MLP1    | 1 | psiblast       | 1c1gA_  | 103  |
| YKR095W | MLP1    | 2 | psiblast       | 1c1gA_  | 224  |
| YKR095W | MLP1    | 3 | msa            | na      | 123  |
| YKR095W | MLP1    | 4 | psiblast       | 1i84S_  | 152  |
| YKR095W | MLP1    | 5 | psiblast       | 1i84S_  | 299  |
| YKR095W | MLP1    | 6 | msa            | na      | 520  |
| YKR095W | MLP1    | 7 | unassigned     | na      | 86   |
| YKR095W | MLP1    | 8 | fold_recogniti | 1k83A   | 368  |
| YKR096W | YKR096W | 1 | unassigned     | na      | 1019 |
| YKR096W | YKR096W | 2 | msa            | na      | 176  |
| YKR097W | PCK1    | 1 | psiblast       | 1ii2A_  | 283  |
| YKR097W | PCK1    | 2 | psiblast       | 1ii2A_  | 126  |
| YKR097W | PCK1    | 3 | psiblast       | 1ii2A_  | 140  |
| YKR098C | UBP11   | 1 | unassigned     | na      | 54   |
| YKR098C | UBP11   | 2 | msa            | na      | 192  |
| YKR098C | UBP11   | 3 | pfam           | PF00442 | 136  |
| YKR098C | UBP11   | 4 | msa            | na      | 140  |
| YKR098C | UBP11   | 5 | unassigned     | na      | 100  |
| YKR098C | UBP11   | 6 | pfam           | PF00443 | 95   |
| YKR099W | BAS1    | 1 | psiblast       | 1h88C_  | 113  |

|         |         |   |                |         |     |
|---------|---------|---|----------------|---------|-----|
| YKR099W | BAS1    | 2 | psiblast       | 1h88C_  | 51  |
| YKR099W | BAS1    | 3 | psiblast       | 1h88C_  | 62  |
| YKR099W | BAS1    | 4 | msa            | na      | 233 |
| YKR099W | BAS1    | 5 | unassigned     | na      | 352 |
| YKR100C | SKG1    | 1 | msa            | na      | 182 |
| YKR100C | SKG1    | 2 | unassigned     | na      | 59  |
| YKR101W | SIR1    | 1 | unassigned     | na      | 678 |
| YKR102W | FLO10   | 1 | msa            | na      | 345 |
| YKR102W | FLO10   | 2 | unassigned     | na      | 217 |
| YKR102W | FLO10   | 3 | msa            | na      | 274 |
| YKR102W | FLO10   | 4 | msa            | na      | 193 |
| YKR102W | FLO10   | 5 | msa            | na      | 140 |
| YKR103W | NFT1    | 1 | msa            | na      | 268 |
| YKR103W | NFT1    | 2 | psiblast       | 1jsqA_  | 334 |
| YKR103W | NFT1    | 3 | psiblast       | 1jsqA_  | 307 |
| YKR103W | NFT1    | 4 | unassigned     | na      | 88  |
| YKR103W | NFT1    | 5 | fold_recogniti | 1qu7A   | 221 |
| YKR104W | NFT1    | 1 | psiblast       | 1jsqA_  | 306 |
| YKR105C | YKR105C | 1 | psiblast       | 1lviA_  | 242 |
| YKR105C | YKR105C | 2 | unassigned     | na      | 72  |
| YKR105C | YKR105C | 3 | msa            | na      | 212 |
| YKR105C | YKR105C | 4 | unassigned     | na      | 56  |
| YKR106W | YKR106W | 1 | psiblast       | 1ja5A_  | 406 |
| YKR106W | YKR106W | 2 | msa            | na      | 209 |
| YLL001W | DNM1    | 1 | psiblast       | 1jwyB_  | 353 |
| YLL001W | DNM1    | 2 | pfam           | PF01031 | 190 |
| YLL001W | DNM1    | 3 | psiblast       | 1dynA_  | 117 |
| YLL001W | DNM1    | 4 | pfam           | PF02212 | 97  |
| YLL002W | RTT109  | 1 | unassigned     | na      | 168 |
| YLL002W | RTT109  | 2 | msa            | na      | 268 |
| YLL003W | SFI1    | 1 | unassigned     | na      | 96  |
| YLL003W | SFI1    | 2 | fold_recogniti | 1qgkA   | 164 |
| YLL003W | SFI1    | 3 | fold_recogniti | 1qgkA   | 194 |
| YLL003W | SFI1    | 4 | fold_recogniti | 1qgkA   | 92  |
| YLL003W | SFI1    | 5 | fold_recogniti | 1qgkA   | 109 |
| YLL003W | SFI1    | 6 | fold_recogniti | 1qgkA   | 158 |
| YLL003W | SFI1    | 7 | unassigned     | na      | 133 |
| YLL004W | ORC3    | 1 | unassigned     | na      | 122 |
| YLL004W | ORC3    | 2 | fold_recogniti | 1n1bA   | 156 |
| YLL004W | ORC3    | 3 | fold_recogniti | 1n1bA   | 228 |
| YLL004W | ORC3    | 4 | unassigned     | na      | 110 |
| YLL005C | SPO75   | 1 | msa            | na      | 235 |
| YLL005C | SPO75   | 2 | unassigned     | na      | 162 |
| YLL005C | SPO75   | 3 | pfam           | PF02714 | 471 |
| YLL006W | MMM1    | 1 | unassigned     | na      | 84  |
| YLL006W | MMM1    | 2 | msa            | na      | 342 |
| YLL007C | YLL007C | 1 | unassigned     | na      | 115 |
| YLL007C | YLL007C | 2 | fold_recogniti | 1qoyA   | 304 |

|           |         |                  |         |     |
|-----------|---------|------------------|---------|-----|
| YLL007C   | YLL007C | 3 fold_recogniti | 1qoyA   | 52  |
| YLL007C   | YLL007C | 4 unassigned     | na      | 194 |
| YLL008W   | DRS1    | 1 fold_recogniti | 1I8mA   | 68  |
| YLL008W   | DRS1    | 2 fold_recogniti | 1I8mA   | 79  |
| YLL008W   | DRS1    | 3 fold_recogniti | 1I8mA   | 84  |
| YLL008W   | DRS1    | 4 psiblast       | 1hv8A_  | 213 |
| YLL008W   | DRS1    | 5 psiblast       | 1hv8A_  | 154 |
| YLL008W   | DRS1    | 6 psiblast       | 1d2mA_  | 154 |
| YLL009C   | COX17   | 1 unassigned     | na      | 69  |
| YLL010C   | PSR1    | 1 msa            | na      | 225 |
| YLL010C   | PSR1    | 2 pfam           | PF03031 | 202 |
| YLL011W   | SOF1    | 1 fold_recogniti | 1scgB   | 108 |
| YLL011W   | SOF1    | 2 psiblast       | 1erjA_  | 381 |
| YLL012W   | YLL012W | 1 unassigned     | na      | 138 |
| YLL012W   | YLL012W | 2 psiblast       | 1hlgA_  | 435 |
| YLL013C   | PUF3    | 1 msa            | na      | 147 |
| YLL013C   | PUF3    | 2 fold_recogniti | 1k83A   | 366 |
| YLL013C   | PUF3    | 3 psiblast       | 1ib2A_  | 134 |
| YLL013C   | PUF3    | 4 psiblast       | 1ib2A_  | 99  |
| YLL013C   | PUF3    | 5 psiblast       | 1ib2A_  | 133 |
| YLL014W   | YLL014W | 1 unassigned     | na      | 108 |
| YLL015W   | BPT1    | 1 msa            | na      | 241 |
| YLL015W   | BPT1    | 2 fold_recogniti | 1i84S   | 384 |
| YLL015W   | BPT1    | 3 psiblast       | 1nbd__  | 267 |
| YLL015W   | BPT1    | 4 unassigned     | na      | 63  |
| YLL015W   | BPT1    | 5 psiblast       | 1jsqA_  | 305 |
| YLL015W   | BPT1    | 6 psiblast       | 1jsqA_  | 299 |
| YLL016W   | SDC25   | 1 msa            | na      | 158 |
| YLL016W   | SDC25   | 2 unassigned     | na      | 368 |
| YLL016W   | SDC25   | 3 psiblast       | 1bkdS_  | 220 |
| YLL016W   | SDC25   | 4 psiblast       | 1bkdS_  | 302 |
| YLL017W   | SDC25   | 1 psiblast       | 1g83A_  | 103 |
| YLL018C   | DPS1    | 1 psiblast       | 1asyA_  | 210 |
| YLL018C   | DPS1    | 2 psiblast       | 1asyA_  | 347 |
| YLL018C-A | COX19   | 1 unassigned     | na      | 98  |
| YLL019C   | KNS1    | 1 msa            | na      | 156 |
| YLL019C   | KNS1    | 2 unassigned     | na      | 57  |
| YLL019C   | KNS1    | 3 psiblast       | 1bmka_  | 210 |
| YLL019C   | KNS1    | 4 psiblast       | 1bmka_  | 254 |
| YLL019C   | KNS1    | 5 fold_recogniti | 1i09A   | 60  |
| YLL020C   | YLL020C | 1 unassigned     | na      | 101 |
| YLL021W   | SPA2    | 1 msa            | na      | 284 |
| YLL021W   | SPA2    | 2 unassigned     | na      | 89  |
| YLL021W   | SPA2    | 3 msa            | na      | 586 |
| YLL021W   | SPA2    | 4 msa            | na      | 393 |
| YLL021W   | SPA2    | 5 unassigned     | na      | 114 |
| YLL022C   | HIF1    | 1 fold_recogniti | 1gt8A   | 385 |
| YLL023C   | YLL023C | 1 unassigned     | na      | 279 |

|         |         |   |                |         |     |
|---------|---------|---|----------------|---------|-----|
| YLL024C | SSA2    | 1 | psiblast       | 1hpm__  | 191 |
| YLL024C | SSA2    | 2 | psiblast       | 1hpm__  | 116 |
| YLL024C | SSA2    | 3 | psiblast       | 1hpm__  | 75  |
| YLL024C | SSA2    | 4 | psiblast       | 1ckrA_  | 158 |
| YLL024C | SSA2    | 5 | psiblast       | 1i84S_  | 99  |
| YLL025W | YLL025W | 1 | pfam           | PF00660 | 124 |
| YLL026W | HSP104  | 1 | msa            | na      | 85  |
| YLL026W | HSP104  | 2 | pfam           | PF02861 | 76  |
| YLL026W | HSP104  | 3 | psiblast       | 1jbkA_  | 192 |
| YLL026W | HSP104  | 4 | fold_recogniti | 1ksfX   | 83  |
| YLL026W | HSP104  | 5 | psiblast       | 1g4aE_  | 414 |
| YLL026W | HSP104  | 6 | unassigned     | na      | 58  |
| YLL027W | ISA1    | 1 | unassigned     | na      | 110 |
| YLL027W | ISA1    | 2 | pfam           | PF01521 | 140 |
| YLL028W | TPO1    | 1 | unassigned     | na      | 119 |
| YLL028W | TPO1    | 2 | psiblast       | 1ja5A_  | 426 |
| YLL028W | TPO1    | 3 | psiblast       | 1ja5A_  | 41  |
| YLL029W | YLL029W | 1 | unassigned     | na      | 83  |
| YLL029W | YLL029W | 2 | fold_recogniti | 1chmA   | 194 |
| YLL029W | YLL029W | 3 | psiblast       | 1jaw__  | 174 |
| YLL029W | YLL029W | 4 | psiblast       | 1jaw__  | 298 |
| YLL030C | YLL030C | 1 | unassigned     | na      | 113 |
| YLL031C | GPI13   | 1 | unassigned     | na      | 75  |
| YLL031C | GPI13   | 2 | psiblast       | 1ejjA_  | 338 |
| YLL031C | GPI13   | 3 | msa            | na      | 143 |
| YLL031C | GPI13   | 4 | unassigned     | na      | 64  |
| YLL031C | GPI13   | 5 | msa            | na      | 397 |
| YLL032C | YLL032C | 1 | unassigned     | na      | 141 |
| YLL032C | YLL032C | 2 | msa            | na      | 217 |
| YLL032C | YLL032C | 3 | psiblast       | 1e3pA_  | 196 |
| YLL032C | YLL032C | 4 | psiblast       | 1j4wA_  | 93  |
| YLL032C | YLL032C | 5 | msa            | na      | 98  |
| YLL032C | YLL032C | 6 | unassigned     | na      | 80  |
| YLL033W | GON2    | 1 | unassigned     | na      | 230 |
| YLL034C | RIX7    | 1 | psiblast       | 1e32A_  | 105 |
| YLL034C | RIX7    | 2 | psiblast       | 1e32A_  | 96  |
| YLL034C | RIX7    | 3 | psiblast       | 1e32A_  | 176 |
| YLL034C | RIX7    | 4 | psiblast       | 1e32A_  | 97  |
| YLL034C | RIX7    | 5 | unassigned     | na      | 90  |
| YLL034C | RIX7    | 6 | pfam           | PF00004 | 218 |
| YLL034C | RIX7    | 7 | unassigned     | na      | 55  |
| YLL035W | GRC3    | 1 | unassigned     | na      | 196 |
| YLL035W | GRC3    | 2 | fold_recogniti | 1jsqA   | 205 |
| YLL035W | GRC3    | 3 | msa            | na      | 231 |
| YLL036C | PRP19   | 1 | psiblast       | 1bf5A_  | 124 |
| YLL036C | PRP19   | 2 | psiblast       | 1gg2B_  | 379 |
| YLL037W | YLL037W | 1 | unassigned     | na      | 126 |
| YLL038C | ENT4    | 1 | psiblast       | 1eyhA_  | 162 |

|         |         |    |                |         |     |
|---------|---------|----|----------------|---------|-----|
| YLL038C | ENT4    | 2  | unassigned     | na      | 85  |
| YLL039C | UBI4    | 1  | psiblast       | 1ndda_  | 76  |
| YLL039C | UBI4    | 2  | fold_recogniti | 1ndda   | 74  |
| YLL039C | UBI4    | 3  | psiblast       | 1gjzA_  | 65  |
| YLL039C | UBI4    | 4  | psiblast       | 1aarA_  | 89  |
| YLL039C | UBI4    | 5  | fold_recogniti | 1j8cA   | 77  |
| YLL040C | VPS13   | 1  | msa            | na      | 394 |
| YLL040C | VPS13   | 2  | unassigned     | na      | 79  |
| YLL040C | VPS13   | 3  | msa            | na      | 390 |
| YLL040C | VPS13   | 4  | unassigned     | na      | 364 |
| YLL040C | VPS13   | 5  | msa            | na      | 126 |
| YLL040C | VPS13   | 6  | unassigned     | na      | 386 |
| YLL040C | VPS13   | 7  | msa            | na      | 125 |
| YLL040C | VPS13   | 8  | unassigned     | na      | 305 |
| YLL040C | VPS13   | 9  | msa            | na      | 109 |
| YLL040C | VPS13   | 10 | msa            | na      | 263 |
| YLL040C | VPS13   | 11 | unassigned     | na      | 78  |
| YLL040C | VPS13   | 12 | msa            | na      | 402 |
| YLL040C | VPS13   | 13 | unassigned     | na      | 123 |
| YLL041C | SDH2    | 1  | psiblast       | 1kf6B_  | 136 |
| YLL041C | SDH2    | 2  | psiblast       | 1kf6B_  | 130 |
| YLL042C | ATG10   | 1  | unassigned     | na      | 167 |
| YLL043W | FPS1    | 1  | unassigned     | na      | 228 |
| YLL043W | FPS1    | 2  | psiblast       | 1fx8A_  | 176 |
| YLL043W | FPS1    | 3  | psiblast       | 1fx8A_  | 153 |
| YLL043W | FPS1    | 4  | unassigned     | na      | 112 |
| YLL045C | RPL8B   | 1  | msa            | na      | 96  |
| YLL045C | RPL8B   | 2  | psiblast       | 1k5yG_  | 160 |
| YLL046C | RNP1    | 1  | psiblast       | 1l3kA_  | 119 |
| YLL046C | RNP1    | 2  | psiblast       | 1l3kA_  | 130 |
| YLL048C | YBT1    | 1  | msa            | na      | 306 |
| YLL048C | YBT1    | 2  | pfam           | PF00664 | 372 |
| YLL048C | YBT1    | 3  | psiblast       | 1nbd__  | 278 |
| YLL048C | YBT1    | 4  | unassigned     | na      | 78  |
| YLL048C | YBT1    | 5  | psiblast       | 1jsqA_  | 306 |
| YLL048C | YBT1    | 6  | psiblast       | 1jsqA_  | 321 |
| YLL049W | YLL049W | 1  | unassigned     | na      | 179 |
| YLL050C | COF1    | 1  | psiblast       | 1cfyA_  | 143 |
| YLL051C | FRE6    | 1  | unassigned     | na      | 272 |
| YLL051C | FRE6    | 2  | msa            | na      | 150 |
| YLL051C | FRE6    | 3  | psiblast       | 1cnf__  | 118 |
| YLL051C | FRE6    | 4  | psiblast       | 1cnf__  | 172 |
| YLL052C | AQY2    | 1  | unassigned     | na      | 149 |
| YLL053C | YLL053C | 1  | psiblast       | 1j4nA_  | 152 |
| YLL054C | YLL054C | 1  | psiblast       | 1pyiA_  | 150 |
| YLL054C | YLL054C | 2  | unassigned     | na      | 60  |
| YLL054C | YLL054C | 3  | fold_recogniti | 1n1bA   | 59  |
| YLL054C | YLL054C | 4  | fold_recogniti | 1n1bA   | 436 |



|         |         |   |                |         |     |
|---------|---------|---|----------------|---------|-----|
| YLL054C | YLL054C | 5 | unassigned     | na      | 64  |
| YLL055W | YLL055W | 1 | psiblast       | 1ja5A_  | 531 |
| YLL056C | YLL056C | 1 | psiblast       | 1bxkA_  | 227 |
| YLL056C | YLL056C | 2 | psiblast       | 1bxkA_  | 71  |
| YLL057C | JLP1    | 1 | unassigned     | na      | 91  |
| YLL057C | JLP1    | 2 | psiblast       | 1gy9A_  | 203 |
| YLL057C | JLP1    | 3 | psiblast       | 1gy9A_  | 118 |
| YLL058W | YLL058W | 1 | unassigned     | na      | 95  |
| YLL058W | YLL058W | 2 | psiblast       | 1gc0A_  | 338 |
| YLL058W | YLL058W | 3 | psiblast       | 1gc0A_  | 142 |
| YLL059C | YLL059C | 1 | unassigned     | na      | 168 |
| YLL060C | GTT2    | 1 | psiblast       | 1byeA_  | 99  |
| YLL060C | GTT2    | 2 | psiblast       | 1byeA_  | 134 |
| YLL061W | MMP1    | 1 | pfam           | PF00324 | 583 |
| YLL062C | MHT1    | 1 | fold_recogniti | 1dhpA   | 324 |
| YLL063C | AYT1    | 1 | fold_recogniti | 1I5aA   | 272 |
| YLL063C | AYT1    | 2 | fold_recogniti | 1I5aA   | 202 |
| YLL064C | YLL064C | 1 | pfam           | PF00660 | 120 |
| YLL065W | YLL065W | 1 | unassigned     | na      | 116 |
| YLL066C | YLL066C | 1 | msa            | na      | 144 |
| YLL066C | YLL066C | 2 | psiblast       | 1fuuA_  | 499 |
| YLL066C | YLL066C | 3 | unassigned     | na      | 69  |
| YLL066C | YLL066C | 4 | psiblast       | 1ezgA_  | 107 |
| YLL066C | YLL066C | 5 | unassigned     | na      | 386 |
| YLL067C | YLL067C | 1 | msa            | na      | 111 |
| YLL067C | YLL067C | 2 | psiblast       | 1fuuA_  | 513 |
| YLL067C | YLL067C | 3 | fold_recogniti | 1m2vB   | 404 |
| YLL067C | YLL067C | 4 | unassigned     | na      | 177 |
| YLR001C | YLR001C | 1 | pfam           | PF02469 | 197 |
| YLR001C | YLR001C | 2 | unassigned     | na      | 85  |
| YLR001C | YLR001C | 3 | msa            | na      | 379 |
| YLR001C | YLR001C | 4 | unassigned     | na      | 140 |
| YLR001C | YLR001C | 5 | msa            | na      | 61  |
| YLR002C | NOC3    | 1 | unassigned     | na      | 111 |
| YLR002C | NOC3    | 2 | fold_recogniti | 1b3uA   | 152 |
| YLR002C | NOC3    | 3 | fold_recogniti | 1b3uA   | 66  |
| YLR002C | NOC3    | 4 | fold_recogniti | 1b3uA   | 141 |
| YLR002C | NOC3    | 5 | fold_recogniti | 1b3uA   | 193 |
| YLR003C | YLR003C | 1 | unassigned     | na      | 291 |
| YLR004C | YLR004C | 1 | psiblast       | 1ja5A_  | 523 |
| YLR005W | SSL1    | 1 | unassigned     | na      | 116 |
| YLR005W | SSL1    | 2 | psiblast       | 1a8x__  | 229 |
| YLR005W | SSL1    | 3 | psiblast       | 1e53A_  | 116 |
| YLR006C | SSK1    | 1 | unassigned     | na      | 183 |
| YLR006C | SSK1    | 2 | msa            | na      | 131 |
| YLR006C | SSK1    | 3 | psiblast       | 1bxDA_  | 183 |
| YLR006C | SSK1    | 4 | psiblast       | 1kgsA_  | 215 |
| YLR007W | NSE1    | 1 | unassigned     | na      | 107 |

|         |         |   |                |         |     |
|---------|---------|---|----------------|---------|-----|
| YLR007W | NSE1    | 2 | msa            | na      | 97  |
| YLR007W | NSE1    | 3 | unassigned     | na      | 132 |
| YLR008C | PAM18   | 1 | unassigned     | na      | 92  |
| YLR008C | PAM18   | 2 | psiblast       | 1hdj__  | 76  |
| YLR009W | RLP24   | 1 | psiblast       | 1k5yS_  | 61  |
| YLR009W | RLP24   | 2 | msa            | na      | 138 |
| YLR010C | TEN1    | 1 | unassigned     | na      | 160 |
| YLR011W | LOT6    | 1 | psiblast       | 1qrdA_  | 191 |
| YLR012C | YLR012C | 1 | unassigned     | na      | 122 |
| YLR013W | GAT3    | 1 | psiblast       | 4gatA_  | 141 |
| YLR014C | PPR1    | 1 | psiblast       | 1pyiA_  | 133 |
| YLR014C | PPR1    | 2 | unassigned     | na      | 139 |
| YLR014C | PPR1    | 3 | msa            | na      | 346 |
| YLR014C | PPR1    | 4 | unassigned     | na      | 286 |
| YLR015W | BRE2    | 1 | msa            | na      | 275 |
| YLR015W | BRE2    | 2 | unassigned     | na      | 230 |
| YLR016C | YLR016C | 1 | unassigned     | na      | 72  |
| YLR016C | YLR016C | 2 | psiblast       | 1lgqA_  | 132 |
| YLR017W | MEU1    | 1 | psiblast       | 1cb0A_  | 337 |
| YLR018C | POM34   | 1 | msa            | na      | 179 |
| YLR018C | POM34   | 2 | unassigned     | na      | 120 |
| YLR019W | PSR2    | 1 | msa            | na      | 188 |
| YLR019W | PSR2    | 2 | pfam           | PF03031 | 209 |
| YLR020C | YLR020C | 1 | unassigned     | na      | 121 |
| YLR020C | YLR020C | 2 | psiblast       | 1k8qA_  | 417 |
| YLR021W | YLR021W | 1 | unassigned     | na      | 179 |
| YLR022C | YLR022C | 1 | pfam           | PF01172 | 250 |
| YLR023C | YLR023C | 1 | unassigned     | na      | 174 |
| YLR023C | YLR023C | 2 | pfam           | PF03006 | 369 |
| YLR024C | UBR2    | 1 | unassigned     | na      | 81  |
| YLR024C | UBR2    | 2 | pfam           | PF02207 | 92  |
| YLR024C | UBR2    | 3 | unassigned     | na      | 540 |
| YLR024C | UBR2    | 4 | msa            | na      | 557 |
| YLR024C | UBR2    | 5 | unassigned     | na      | 300 |
| YLR024C | UBR2    | 6 | msa            | na      | 302 |
| YLR025W | SNF7    | 1 | psiblast       | 1i84S_  | 240 |
| YLR026C | SED5    | 1 | fold_recogniti | 1mqsB   | 45  |
| YLR026C | SED5    | 2 | psiblast       | 1dn1B_  | 242 |
| YLR026C | SED5    | 3 | psiblast       | 1dn1B_  | 53  |
| YLR027C | AAT2    | 1 | psiblast       | 1yaaA_  | 152 |
| YLR027C | AAT2    | 2 | psiblast       | 1yaaA_  | 280 |
| YLR028C | ADE16   | 1 | psiblast       | 1g8mA_  | 197 |
| YLR028C | ADE16   | 2 | psiblast       | 1g8mA_  | 181 |
| YLR028C | ADE16   | 3 | psiblast       | 1g8mA_  | 213 |
| YLR029C | RPL15A  | 1 | psiblast       | 1k5yL_  | 204 |
| YLR030W | YLR030W | 1 | unassigned     | na      | 263 |
| YLR031W | YLR031W | 1 | unassigned     | na      | 186 |
| YLR032W | RAD5    | 1 | msa            | na      | 378 |

|         |         |   |                |         |      |
|---------|---------|---|----------------|---------|------|
| YLR032W | RAD5    | 2 | fold_recogniti | 1gm5A   | 98   |
| YLR032W | RAD5    | 3 | fold_recogniti | 1gm5A   | 343  |
| YLR032W | RAD5    | 4 | msa            | na      | 102  |
| YLR032W | RAD5    | 5 | unassigned     | na      | 54   |
| YLR032W | RAD5    | 6 | psiblast       | 1d9xA_  | 194  |
| YLR033W | RSC58   | 1 | unassigned     | na      | 502  |
| YLR034C | SMF3    | 1 | pfam           | PF01566 | 473  |
| YLR035C | MLH2    | 1 | psiblast       | 1ea6A_  | 221  |
| YLR035C | MLH2    | 2 | psiblast       | 1ea6A_  | 173  |
| YLR035C | MLH2    | 3 | msa            | na      | 118  |
| YLR035C | MLH2    | 4 | unassigned     | na      | 183  |
| YLR036C | YLR036C | 1 | unassigned     | na      | 203  |
| YLR037C | DAN2    | 1 | pfam           | PF00660 | 124  |
| YLR038C | COX12   | 1 | psiblast       | 1occH_  | 83   |
| YLR039C | RIC1    | 1 | unassigned     | na      | 1056 |
| YLR040C | YLR040C | 1 | unassigned     | na      | 224  |
| YLR041W | YLR041W | 1 | unassigned     | na      | 106  |
| YLR042C | YLR042C | 1 | unassigned     | na      | 161  |
| YLR043C | TRX1    | 1 | psiblast       | 1erv__  | 103  |
| YLR044C | PDC1    | 1 | psiblast       | 1qpbA_  | 188  |
| YLR044C | PDC1    | 2 | psiblast       | 1qpbA_  | 165  |
| YLR044C | PDC1    | 3 | psiblast       | 1qpbA_  | 210  |
| YLR045C | STU2    | 1 | psiblast       | 1b3uA_  | 155  |
| YLR045C | STU2    | 2 | psiblast       | 1b3uA_  | 175  |
| YLR045C | STU2    | 3 | psiblast       | 1b3uA_  | 231  |
| YLR045C | STU2    | 4 | msa            | na      | 194  |
| YLR045C | STU2    | 5 | unassigned     | na      | 133  |
| YLR046C | YLR046C | 1 | msa            | na      | 270  |
| YLR047C | YLR047C | 1 | unassigned     | na      | 142  |
| YLR047C | YLR047C | 2 | msa            | na      | 122  |
| YLR047C | YLR047C | 3 | psiblast       | 1ib0A_  | 129  |
| YLR047C | YLR047C | 4 | psiblast       | 1ib0A_  | 178  |
| YLR047C | YLR047C | 5 | unassigned     | na      | 115  |
| YLR048W | RPS0B   | 1 | psiblast       | 1k5xB_  | 252  |
| YLR049C | YLR049C | 1 | unassigned     | na      | 428  |
| YLR050C | YLR050C | 1 | unassigned     | na      | 161  |
| YLR051C | YLR051C | 1 | msa            | na      | 217  |
| YLR052W | IES3    | 1 | unassigned     | na      | 250  |
| YLR053C | YLR053C | 1 | unassigned     | na      | 108  |
| YLR054C | OSW2    | 1 | unassigned     | na      | 512  |
| YLR055C | SPT8    | 1 | fold_recogniti | 1l8mA   | 66   |
| YLR055C | SPT8    | 2 | fold_recogniti | 1l8mA   | 58   |
| YLR055C | SPT8    | 3 | psiblast       | 1gg2B_  | 367  |
| YLR055C | SPT8    | 4 | psiblast       | 1kb0A_  | 111  |
| YLR056W | ERG3    | 1 | unassigned     | na      | 84   |
| YLR056W | ERG3    | 2 | pfam           | PF01598 | 281  |
| YLR057W | YLR057W | 1 | unassigned     | na      | 157  |
| YLR057W | YLR057W | 2 | psiblast       | 1fmiA_  | 291  |

|         |         |              |         |      |
|---------|---------|--------------|---------|------|
| YLR057W | YLR057W | 3 unassigned | na      | 229  |
| YLR057W | YLR057W | 4 msa        | na      | 172  |
| YLR058C | SHM2    | 1 psiblast   | 1cj0A_  | 196  |
| YLR058C | SHM2    | 2 psiblast   | 1cj0A_  | 273  |
| YLR059C | REX2    | 1 psiblast   | 1fxxA_  | 269  |
| YLR060W | FRS1    | 1 psiblast   | 1b70B_  | 293  |
| YLR060W | FRS1    | 2 psiblast   | 1b70B_  | 82   |
| YLR060W | FRS1    | 3 psiblast   | 1b70B_  | 220  |
| YLR061W | RPL22A  | 1 pfam       | PF01776 | 121  |
| YLR062C | BUD28   | 1 unassigned | na      | 125  |
| YLR063W | YLR063W | 1 unassigned | na      | 365  |
| YLR064W | YLR064W | 1 unassigned | na      | 273  |
| YLR065C | YLR065C | 1 unassigned | na      | 181  |
| YLR066W | SPC3    | 1 unassigned | na      | 184  |
| YLR067C | PET309  | 1 msa        | na      | 692  |
| YLR067C | PET309  | 2 msa        | na      | 132  |
| YLR067C | PET309  | 3 msa        | na      | 141  |
| YLR068W | FYV7    | 1 unassigned | na      | 151  |
| YLR069C | MEF1    | 1 psiblast   | 1dar__  | 352  |
| YLR069C | MEF1    | 2 psiblast   | 1dar__  | 146  |
| YLR069C | MEF1    | 3 psiblast   | 1dar__  | 263  |
| YLR070C | XYL2    | 1 psiblast   | 1e3jA_  | 189  |
| YLR070C | XYL2    | 2 psiblast   | 1e3jA_  | 167  |
| YLR071C | RGR1    | 1 unassigned | na      | 224  |
| YLR071C | RGR1    | 2 msa        | na      | 219  |
| YLR071C | RGR1    | 3 unassigned | na      | 639  |
| YLR072W | YLR072W | 1 unassigned | na      | 112  |
| YLR072W | YLR072W | 2 pfam       | PF02893 | 163  |
| YLR072W | YLR072W | 3 unassigned | na      | 78   |
| YLR072W | YLR072W | 4 msa        | na      | 235  |
| YLR072W | YLR072W | 5 unassigned | na      | 105  |
| YLR073C | YLR073C | 1 unassigned | na      | 200  |
| YLR074C | BUD20   | 1 unassigned | na      | 166  |
| YLR075W | RPL10   | 1 psiblast   | 1k5yI_  | 221  |
| YLR076C | YLR076C | 1 unassigned | na      | 140  |
| YLR077W | FMP25   | 1 unassigned | na      | 158  |
| YLR077W | FMP25   | 2 psiblast   | 1a12A_  | 425  |
| YLR078C | BOS1    | 1 psiblast   | 1i84S_  | 244  |
| YLR079W | SIC1    | 1 unassigned | na      | 284  |
| YLR080W | EMP46   | 1 psiblast   | 1gv9A_  | 277  |
| YLR080W | EMP46   | 2 psiblast   | 1i84S_  | 167  |
| YLR081W | GAL2    | 1 psiblast   | 1ja5A_  | 475  |
| YLR081W | GAL2    | 2 psiblast   | 1ja5A_  | 99   |
| YLR082C | SRL2    | 1 unassigned | na      | 392  |
| YLR083C | EMP70   | 1 pfam       | PF02990 | 667  |
| YLR084C | RAX2    | 1 unassigned | na      | 1220 |
| YLR085C | ARP6    | 1 psiblast   | 1yagA_  | 176  |
| YLR085C | ARP6    | 2 psiblast   | 1yagA_  | 262  |

|         |         |    |                |         |      |
|---------|---------|----|----------------|---------|------|
| YLR086W | SMC4    | 1  | unassigned     | na      | 135  |
| YLR086W | SMC4    | 2  | psiblast       | 1ii8A_  | 78   |
| YLR086W | SMC4    | 3  | psiblast       | 1i84S_  | 298  |
| YLR086W | SMC4    | 4  | psiblast       | 1cii__  | 144  |
| YLR086W | SMC4    | 5  | psiblast       | 1gxIA_  | 69   |
| YLR086W | SMC4    | 6  | psiblast       | 1gxIA_  | 72   |
| YLR086W | SMC4    | 7  | psiblast       | 1gxIA_  | 58   |
| YLR086W | SMC4    | 8  | psiblast       | 1c1gA_  | 64   |
| YLR086W | SMC4    | 9  | psiblast       | 1c1gA_  | 213  |
| YLR086W | SMC4    | 10 | psiblast       | 1jchA_  | 88   |
| YLR086W | SMC4    | 11 | psiblast       | 1e69A_  | 199  |
| YLR087C | CSF1    | 1  | unassigned     | na      | 416  |
| YLR087C | CSF1    | 2  | msa            | na      | 322  |
| YLR087C | CSF1    | 3  | unassigned     | na      | 2220 |
| YLR088W | GAA1    | 1  | unassigned     | na      | 309  |
| YLR088W | GAA1    | 2  | msa            | na      | 193  |
| YLR088W | GAA1    | 3  | unassigned     | na      | 112  |
| YLR089C | ALT1    | 1  | msa            | na      | 162  |
| YLR089C | ALT1    | 2  | psiblast       | 1iaxA_  | 129  |
| YLR089C | ALT1    | 3  | psiblast       | 1iaxA_  | 301  |
| YLR090W | XDJ1    | 1  | psiblast       | 1bq0__  | 120  |
| YLR090W | XDJ1    | 2  | psiblast       | 1exkA_  | 118  |
| YLR090W | XDJ1    | 3  | psiblast       | 1c3gA_  | 161  |
| YLR090W | XDJ1    | 4  | unassigned     | na      | 60   |
| YLR091W | YLR091W | 1  | unassigned     | na      | 293  |
| YLR092W | SUL2    | 1  | psiblast       | 1hynP_  | 105  |
| YLR092W | SUL2    | 2  | msa            | na      | 126  |
| YLR092W | SUL2    | 3  | pfam           | PF00916 | 353  |
| YLR092W | SUL2    | 4  | msa            | na      | 309  |
| YLR093C | NYV1    | 1  | psiblast       | 1ifqA_  | 145  |
| YLR093C | NYV1    | 2  | psiblast       | 1sfcA_  | 106  |
| YLR094C | GIS3    | 1  | msa            | na      | 275  |
| YLR094C | GIS3    | 2  | unassigned     | na      | 227  |
| YLR095C | IOC2    | 1  | unassigned     | na      | 285  |
| YLR095C | IOC2    | 2  | fold_recogniti | 1iu4A   | 340  |
| YLR095C | IOC2    | 3  | unassigned     | na      | 187  |
| YLR096W | KIN2    | 1  | unassigned     | na      | 66   |
| YLR096W | KIN2    | 2  | psiblast       | 1a06__  | 167  |
| YLR096W | KIN2    | 3  | psiblast       | 1a06__  | 194  |
| YLR096W | KIN2    | 4  | psiblast       | 1ahr__  | 78   |
| YLR096W | KIN2    | 5  | psiblast       | 1ahr__  | 64   |
| YLR096W | KIN2    | 6  | fold_recogniti | 1k83A   | 361  |
| YLR096W | KIN2    | 7  | fold_recogniti | 1m2vB   | 53   |
| YLR096W | KIN2    | 8  | unassigned     | na      | 164  |
| YLR097C | HRT3    | 1  | unassigned     | na      | 73   |
| YLR097C | HRT3    | 2  | pfam           | PF00646 | 116  |
| YLR097C | HRT3    | 3  | unassigned     | na      | 155  |
| YLR098C | CHA4    | 1  | psiblast       | 1cld__  | 118  |

|           |           |                  |         |     |
|-----------|-----------|------------------|---------|-----|
| YLR098C   | CHA4      | 2 unassigned     | na      | 55  |
| YLR098C   | CHA4      | 3 fold_recogniti | 1n1bA   | 304 |
| YLR098C   | CHA4      | 4 fold_recogniti | 1n1bA   | 57  |
| YLR098C   | CHA4      | 5 fold_recogniti | 1n1bA   | 114 |
| YLR099C   | ICT1      | 1 psiblast       | 1cqzA_  | 394 |
| YLR099W-A | YLR099W-A | 1 unassigned     | na      | 87  |
| YLR100W   | ERG27     | 1 psiblast       | 1gcoA_  | 347 |
| YLR101C   | YLR101C   | 1 unassigned     | na      | 131 |
| YLR102C   | APC9      | 1 unassigned     | na      | 265 |
| YLR103C   | CDC45     | 1 pfam           | PF02724 | 650 |
| YLR104W   | YLR104W   | 1 unassigned     | na      | 131 |
| YLR105C   | SEN2      | 1 msa            | na      | 155 |
| YLR105C   | SEN2      | 2 psiblast       | 1a79A_  | 105 |
| YLR105C   | SEN2      | 3 psiblast       | 1a79A_  | 117 |
| YLR107W   | REX3      | 1 unassigned     | na      | 189 |
| YLR107W   | REX3      | 2 psiblast       | 1dpi__  | 215 |
| YLR108C   | YLR108C   | 1 pfam           | PF02214 | 165 |
| YLR108C   | YLR108C   | 2 unassigned     | na      | 320 |
| YLR109W   | AHP1      | 1 psiblast       | 1h4oA_  | 176 |
| YLR110C   | CCW12     | 1 unassigned     | na      | 133 |
| YLR111W   | YLR111W   | 1 unassigned     | na      | 110 |
| YLR112W   | YLR112W   | 1 unassigned     | na      | 139 |
| YLR113W   | HOG1      | 1 psiblast       | 1bmka_  | 166 |
| YLR113W   | HOG1      | 2 psiblast       | 1bmka_  | 216 |
| YLR113W   | HOG1      | 3 unassigned     | na      | 53  |
| YLR114C   | YLR114C   | 1 msa            | na      | 169 |
| YLR114C   | YLR114C   | 2 unassigned     | na      | 118 |
| YLR114C   | YLR114C   | 3 msa            | na      | 477 |
| YLR115W   | CFT2      | 1 psiblast       | 1e5dA_  | 273 |
| YLR115W   | CFT2      | 2 msa            | na      | 208 |
| YLR115W   | CFT2      | 3 msa            | na      | 378 |
| YLR116W   | MSL5      | 1 msa            | na      | 95  |
| YLR116W   | MSL5      | 2 psiblast       | 1k1gA_  | 178 |
| YLR116W   | MSL5      | 3 fold_recogniti | 1k83A   | 203 |
| YLR117C   | CLF1      | 1 psiblast       | 1a17__  | 154 |
| YLR117C   | CLF1      | 2 fold_recogniti | 1ihgA   | 103 |
| YLR117C   | CLF1      | 3 fold_recogniti | 1ihgA   | 92  |
| YLR117C   | CLF1      | 4 psiblast       | 1fchA_  | 102 |
| YLR117C   | CLF1      | 5 psiblast       | 1fchA_  | 74  |
| YLR117C   | CLF1      | 6 psiblast       | 1fchA_  | 100 |
| YLR117C   | CLF1      | 7 unassigned     | na      | 62  |
| YLR118C   | YLR118C   | 1 psiblast       | 1fj2A_  | 227 |
| YLR119W   | SRN2      | 1 unassigned     | na      | 213 |
| YLR120C   | YPS1      | 1 fold_recogniti | 1qdmA   | 139 |
| YLR120C   | YPS1      | 2 psiblast       | 1ypsA_  | 83  |
| YLR120C   | YPS1      | 3 psiblast       | 1ypsA_  | 270 |
| YLR120C   | YPS1      | 4 unassigned     | na      | 77  |
| YLR121C   | YPS3      | 1 psiblast       | 1ypsA_  | 156 |

|         |         |   |                |         |     |
|---------|---------|---|----------------|---------|-----|
| YLR121C | YPS3    | 2 | psiblast       | 1ypsA_  | 277 |
| YLR121C | YPS3    | 3 | unassigned     | na      | 75  |
| YLR122C | YLR122C | 1 | unassigned     | na      | 125 |
| YLR123C | YLR123C | 1 | unassigned     | na      | 109 |
| YLR124W | YLR124W | 1 | unassigned     | na      | 114 |
| YLR125W | YLR125W | 1 | unassigned     | na      | 136 |
| YLR126C | YLR126C | 1 | msa            | na      | 251 |
| YLR127C | APC2    | 1 | unassigned     | na      | 93  |
| YLR127C | APC2    | 2 | msa            | na      | 93  |
| YLR127C | APC2    | 3 | msa            | na      | 220 |
| YLR127C | APC2    | 4 | unassigned     | na      | 352 |
| YLR127C | APC2    | 5 | psiblast       | 1lddA_  | 95  |
| YLR128W | YLR128W | 1 | unassigned     | na      | 124 |
| YLR128W | YLR128W | 2 | pfam           | PF03556 | 145 |
| YLR129W | DIP2    | 1 | unassigned     | na      | 66  |
| YLR129W | DIP2    | 2 | pfam           | PF00400 | 85  |
| YLR129W | DIP2    | 3 | pfam           | PF00400 | 40  |
| YLR129W | DIP2    | 4 | pfam           | PF00400 | 51  |
| YLR129W | DIP2    | 5 | unassigned     | na      | 67  |
| YLR129W | DIP2    | 6 | psiblast       | 1c5kA_  | 80  |
| YLR129W | DIP2    | 7 | psiblast       | 1erjA_  | 340 |
| YLR129W | DIP2    | 8 | msa            | na      | 214 |
| YLR130C | ZRT2    | 1 | msa            | na      | 205 |
| YLR130C | ZRT2    | 2 | pfam           | PF02535 | 217 |
| YLR131C | ACE2    | 1 | msa            | na      | 101 |
| YLR131C | ACE2    | 2 | unassigned     | na      | 69  |
| YLR131C | ACE2    | 3 | msa            | na      | 168 |
| YLR131C | ACE2    | 4 | psiblast       | 1lu6A_  | 59  |
| YLR131C | ACE2    | 5 | psiblast       | 1lu6A_  | 62  |
| YLR131C | ACE2    | 6 | unassigned     | na      | 85  |
| YLR131C | ACE2    | 7 | psiblast       | 1ubdC_  | 92  |
| YLR131C | ACE2    | 8 | msa            | na      | 82  |
| YLR131C | ACE2    | 9 | psiblast       | 2adr__  | 52  |
| YLR132C | YLR132C | 1 | unassigned     | na      | 290 |
| YLR133W | CKI1    | 1 | unassigned     | na      | 143 |
| YLR133W | CKI1    | 2 | fold_recogniti | 1j7iA   | 62  |
| YLR133W | CKI1    | 3 | fold_recogniti | 1j7iA   | 158 |
| YLR133W | CKI1    | 4 | msa            | na      | 156 |
| YLR133W | CKI1    | 5 | unassigned     | na      | 63  |
| YLR134W | PDC5    | 1 | psiblast       | 1qpbA_  | 188 |
| YLR134W | PDC5    | 2 | psiblast       | 1qpbA_  | 165 |
| YLR134W | PDC5    | 3 | psiblast       | 1qpbA_  | 210 |
| YLR135W | SLX4    | 1 | unassigned     | na      | 748 |
| YLR136C | TIS11   | 1 | msa            | na      | 119 |
| YLR136C | TIS11   | 2 | msa            | na      | 166 |
| YLR137W | YLR137W | 1 | msa            | na      | 225 |
| YLR137W | YLR137W | 2 | unassigned     | na      | 142 |
| YLR138W | NHA1    | 1 | psiblast       | 1fftA_  | 321 |

|           |           |                  |         |     |
|-----------|-----------|------------------|---------|-----|
| YLR138W   | NHA1      | 2 unassigned     | na      | 83  |
| YLR138W   | NHA1      | 3 msa            | na      | 581 |
| YLR139C   | SLS1      | 1 unassigned     | na      | 643 |
| YLR140W   | YLR140W   | 1 unassigned     | na      | 108 |
| YLR141W   | RRN5      | 1 unassigned     | na      | 363 |
| YLR142W   | PUT1      | 1 unassigned     | na      | 106 |
| YLR142W   | PUT1      | 2 pfam           | PF01619 | 370 |
| YLR143W   | YLR143W   | 1 fold_recogniti | 1kh1A   | 159 |
| YLR143W   | YLR143W   | 2 pfam           | PF01902 | 120 |
| YLR143W   | YLR143W   | 3 psiblast       | 1qd9A_  | 147 |
| YLR143W   | YLR143W   | 4 msa            | na      | 161 |
| YLR143W   | YLR143W   | 5 unassigned     | na      | 98  |
| YLR144C   | ACF2      | 1 fold_recogniti | 1ldvA   | 208 |
| YLR144C   | ACF2      | 2 pfam           | PF03639 | 571 |
| YLR145W   | YLR145W   | 1 unassigned     | na      | 201 |
| YLR146C   | SPE4      | 1 psiblast       | 1in1A_  | 65  |
| YLR146C   | SPE4      | 2 psiblast       | 1in1A_  | 235 |
| YLR147C   | SMD3      | 1 psiblast       | 1d3bA_  | 101 |
| YLR148W   | PEP3      | 1 unassigned     | na      | 304 |
| YLR148W   | PEP3      | 2 psiblast       | 1b89A_  | 519 |
| YLR148W   | PEP3      | 3 unassigned     | na      | 95  |
| YLR149C   | YLR149C   | 1 psiblast       | 1erjA_  | 374 |
| YLR149C   | YLR149C   | 2 psiblast       | 1gg2B_  | 159 |
| YLR149C   | YLR149C   | 3 unassigned     | na      | 197 |
| YLR149C-A | YLR149C-A | 1 unassigned     | na      | 28  |
| YLR150W   | STM1      | 1 unassigned     | na      | 273 |
| YLR151C   | PCD1      | 1 psiblast       | 1f3yA_  | 244 |
| YLR151C   | PCD1      | 2 unassigned     | na      | 96  |
| YLR152C   | YLR152C   | 1 msa            | na      | 199 |
| YLR152C   | YLR152C   | 2 unassigned     | na      | 132 |
| YLR152C   | YLR152C   | 3 msa            | na      | 245 |
| YLR153C   | ACS2      | 1 psiblast       | 1amuA_  | 266 |
| YLR153C   | ACS2      | 2 psiblast       | 1amuA_  | 265 |
| YLR153C   | ACS2      | 3 psiblast       | 1amuA_  | 152 |
| YLR154C   | RNH203    | 1 unassigned     | na      | 110 |
| YLR155C   | ASP3-1    | 1 psiblast       | 1hfjA_  | 245 |
| YLR155C   | ASP3-1    | 2 psiblast       | 1hfjA_  | 117 |
| YLR156W   | YLR156W   | 1 unassigned     | na      | 114 |
| YLR162W   | YLR162W   | 1 unassigned     | na      | 118 |
| YLR163C   | MAS1      | 1 psiblast       | 1hr6B_  | 254 |
| YLR163C   | MAS1      | 2 psiblast       | 1hr6B_  | 208 |
| YLR164W   | YLR164W   | 1 unassigned     | na      | 168 |
| YLR165C   | PUS5      | 1 psiblast       | 1kskA_  | 254 |
| YLR166C   | SEC10     | 1 fold_recogniti | 1n1bA   | 53  |
| YLR166C   | SEC10     | 2 fold_recogniti | 1qgkA   | 340 |
| YLR166C   | SEC10     | 3 fold_recogniti | 1qgkA   | 74  |
| YLR166C   | SEC10     | 4 fold_recogniti | 1qgkA   | 143 |
| YLR166C   | SEC10     | 5 fold_recogniti | 1qgkA   | 261 |



|         |         |   |                |         |     |
|---------|---------|---|----------------|---------|-----|
| YLR167W | RPS31   | 1 | psiblast       | 1aarA_  | 89  |
| YLR167W | RPS31   | 2 | pfam           | PF01599 | 63  |
| YLR168C | YLR168C | 1 | msa            | na      | 230 |
| YLR169W | YLR169W | 1 | unassigned     | na      | 117 |
| YLR170C | APS1    | 1 | psiblast       | 1gw5S_  | 88  |
| YLR170C | APS1    | 2 | psiblast       | 1gw5S_  | 68  |
| YLR171W | YLR171W | 1 | unassigned     | na      | 129 |
| YLR172C | DPH5    | 1 | psiblast       | 2cbf__  | 113 |
| YLR172C | DPH5    | 2 | psiblast       | 2cbf__  | 187 |
| YLR173W | YLR173W | 1 | unassigned     | na      | 608 |
| YLR174W | IDP2    | 1 | psiblast       | 1cnzA_  | 412 |
| YLR175W | CBF5    | 1 | psiblast       | 1k8wA_  | 264 |
| YLR175W | CBF5    | 2 | psiblast       | 1k8wA_  | 80  |
| YLR175W | CBF5    | 3 | fold_recogniti | 1c1gA   | 139 |
| YLR176C | RFX1    | 1 | fold_recogniti | 1deqA   | 230 |
| YLR176C | RFX1    | 2 | unassigned     | na      | 54  |
| YLR176C | RFX1    | 3 | psiblast       | 1dp7P_  | 76  |
| YLR176C | RFX1    | 4 | fold_recogniti | 1k83A   | 197 |
| YLR176C | RFX1    | 5 | unassigned     | na      | 109 |
| YLR176C | RFX1    | 6 | msa            | na      | 145 |
| YLR177W | YLR177W | 1 | msa            | na      | 52  |
| YLR177W | YLR177W | 2 | unassigned     | na      | 283 |
| YLR177W | YLR177W | 3 | msa            | na      | 293 |
| YLR178C | TFS1    | 1 | psiblast       | 1bd9A_  | 219 |
| YLR179C | YLR179C | 1 | psiblast       | 1kn3A_  | 201 |
| YLR180W | SAM1    | 1 | psiblast       | 1qm4A_  | 168 |
| YLR180W | SAM1    | 2 | psiblast       | 1qm4A_  | 105 |
| YLR180W | SAM1    | 3 | psiblast       | 1qm4A_  | 109 |
| YLR181C | VTA1    | 1 | unassigned     | na      | 84  |
| YLR181C | VTA1    | 2 | fold_recogniti | 1ldvA   | 246 |
| YLR182W | SWI6    | 1 | msa            | na      | 201 |
| YLR182W | SWI6    | 2 | psiblast       | 1sw6A_  | 310 |
| YLR182W | SWI6    | 3 | psiblast       | 1k1aA_  | 89  |
| YLR182W | SWI6    | 4 | fold_recogniti | 1f6fA   | 203 |
| YLR183C | TOS4    | 1 | fold_recogniti | 1g3gA   | 183 |
| YLR183C | TOS4    | 2 | unassigned     | na      | 83  |
| YLR183C | TOS4    | 3 | msa            | na      | 223 |
| YLR184W | YLR184W | 1 | unassigned     | na      | 115 |
| YLR185W | RPL37A  | 1 | psiblast       | 1k5yZ_  | 88  |
| YLR186W | EMG1    | 1 | unassigned     | na      | 61  |
| YLR186W | EMG1    | 2 | pfam           | PF03587 | 191 |
| YLR187W | SKG3    | 1 | unassigned     | na      | 72  |
| YLR187W | SKG3    | 2 | pfam           | PF00169 | 206 |
| YLR187W | SKG3    | 3 | unassigned     | na      | 72  |
| YLR187W | SKG3    | 4 | msa            | na      | 101 |
| YLR187W | SKG3    | 5 | msa            | na      | 575 |
| YLR188W | MDL1    | 1 | unassigned     | na      | 78  |
| YLR188W | MDL1    | 2 | psiblast       | 1jsqA_  | 315 |

|         |         |   |                |        |     |
|---------|---------|---|----------------|--------|-----|
| YLR188W | MDL1    | 3 | psiblast       | 1jsqA_ | 302 |
| YLR189C | ATG26   | 1 | unassigned     | na     | 161 |
| YLR189C | ATG26   | 2 | fold_recogniti | 1eazA  | 213 |
| YLR189C | ATG26   | 3 | unassigned     | na     | 69  |
| YLR189C | ATG26   | 4 | msa            | na     | 269 |
| YLR189C | ATG26   | 5 | psiblast       | 1iirA_ | 205 |
| YLR189C | ATG26   | 6 | psiblast       | 1iirA_ | 113 |
| YLR189C | ATG26   | 7 | psiblast       | 1iirA_ | 168 |
| YLR190W | MMR1    | 1 | fold_recogniti | 1iu4A  | 302 |
| YLR190W | MMR1    | 2 | msa            | na     | 189 |
| YLR191W | PEX13   | 1 | msa            | na     | 109 |
| YLR191W | PEX13   | 2 | unassigned     | na     | 89  |
| YLR191W | PEX13   | 3 | psiblast       | 1bmbA_ | 104 |
| YLR191W | PEX13   | 4 | psiblast       | 1aww__ | 84  |
| YLR192C | HCR1    | 1 | unassigned     | na     | 265 |
| YLR193C | YLR193C | 1 | unassigned     | na     | 175 |
| YLR194C | YLR194C | 1 | psiblast       | 1f00I_ | 152 |
| YLR194C | YLR194C | 2 | psiblast       | 1f00I_ | 102 |
| YLR195C | NMT1    | 1 | psiblast       | 1iicA_ | 214 |
| YLR195C | NMT1    | 2 | psiblast       | 1iicA_ | 241 |
| YLR196W | PWP1    | 1 | unassigned     | na     | 115 |
| YLR196W | PWP1    | 2 | psiblast       | 1gg2B_ | 339 |
| YLR196W | PWP1    | 3 | fold_recogniti | 1jjuB  | 122 |
| YLR197W | SIK1    | 1 | msa            | na     | 89  |
| YLR197W | SIK1    | 2 | unassigned     | na     | 52  |
| YLR197W | SIK1    | 3 | msa            | na     | 363 |
| YLR198C | YLR198C | 1 | unassigned     | na     | 119 |
| YLR199C | YLR199C | 1 | unassigned     | na     | 220 |
| YLR200W | YKE2    | 1 | psiblast       | 1fxkA_ | 114 |
| YLR201C | FMP53   | 1 | fold_recogniti | 1jtxB  | 127 |
| YLR201C | FMP53   | 2 | fold_recogniti | 1jtxB  | 133 |
| YLR202C | YLR202C | 1 | unassigned     | na     | 108 |
| YLR203C | MSS51   | 1 | unassigned     | na     | 436 |
| YLR204W | QRI5    | 1 | unassigned     | na     | 111 |
| YLR205C | HMX1    | 1 | psiblast       | 1qq8A_ | 273 |
| YLR206W | ENT2    | 1 | psiblast       | 1inzA_ | 159 |
| YLR206W | ENT2    | 2 | psiblast       | 1i84S_ | 362 |
| YLR206W | ENT2    | 3 | unassigned     | na     | 92  |
| YLR207W | HRD3    | 1 | fold_recogniti | 1fchA  | 169 |
| YLR207W | HRD3    | 2 | fold_recogniti | 1fchA  | 71  |
| YLR207W | HRD3    | 3 | fold_recogniti | 1fchA  | 112 |
| YLR207W | HRD3    | 4 | psiblast       | 1fchA_ | 144 |
| YLR207W | HRD3    | 5 | psiblast       | 1fchA_ | 82  |
| YLR207W | HRD3    | 6 | psiblast       | 1fchA_ | 128 |
| YLR207W | HRD3    | 7 | unassigned     | na     | 127 |
| YLR208W | SEC13   | 1 | psiblast       | 1erjA_ | 297 |
| YLR209C | PNP1    | 1 | psiblast       | 1vfn__ | 311 |
| YLR210W | CLB4    | 1 | msa            | na     | 201 |

|         |         |   |                |         |     |
|---------|---------|---|----------------|---------|-----|
| YLR210W | CLB4    | 2 | psiblast       | 1vin__  | 137 |
| YLR210W | CLB4    | 3 | psiblast       | 1vin__  | 122 |
| YLR211C | YLR211C | 1 | unassigned     | na      | 140 |
| YLR212C | TUB4    | 1 | psiblast       | 1ffxB_  | 473 |
| YLR213C | CRR1    | 1 | unassigned     | na      | 136 |
| YLR213C | CRR1    | 2 | psiblast       | 1gbg__  | 286 |
| YLR214W | FRE1    | 1 | unassigned     | na      | 144 |
| YLR214W | FRE1    | 2 | msa            | na      | 187 |
| YLR214W | FRE1    | 3 | unassigned     | na      | 55  |
| YLR214W | FRE1    | 4 | psiblast       | 1cnf__  | 130 |
| YLR214W | FRE1    | 5 | psiblast       | 1cnf__  | 170 |
| YLR215C | CDC123  | 1 | unassigned     | na      | 174 |
| YLR215C | CDC123  | 2 | msa            | na      | 186 |
| YLR216C | CPR6    | 1 | psiblast       | 1ihgA_  | 188 |
| YLR216C | CPR6    | 2 | psiblast       | 1ihgA_  | 95  |
| YLR216C | CPR6    | 3 | psiblast       | 1ihgA_  | 88  |
| YLR217W | YLR217W | 1 | unassigned     | na      | 107 |
| YLR218C | YLR218C | 1 | unassigned     | na      | 150 |
| YLR219W | MSC3    | 1 | fold_recogniti | 1deqA   | 166 |
| YLR219W | MSC3    | 2 | fold_recogniti | 1jv2B   | 359 |
| YLR219W | MSC3    | 3 | fold_recogniti | 1jv2B   | 140 |
| YLR219W | MSC3    | 4 | unassigned     | na      | 63  |
| YLR220W | CCC1    | 1 | unassigned     | na      | 78  |
| YLR220W | CCC1    | 2 | pfam           | PF01988 | 244 |
| YLR221C | RSA3    | 1 | msa            | na      | 220 |
| YLR222C | UTP13   | 1 | fold_recogniti | 1erjA   | 131 |
| YLR222C | UTP13   | 2 | pfam           | PF00400 | 47  |
| YLR222C | UTP13   | 3 | pfam           | PF00400 | 47  |
| YLR222C | UTP13   | 4 | unassigned     | na      | 90  |
| YLR222C | UTP13   | 5 | psiblast       | 1gg2B_  | 330 |
| YLR222C | UTP13   | 6 | psiblast       | 1gxrA_  | 119 |
| YLR222C | UTP13   | 7 | unassigned     | na      | 53  |
| YLR223C | IFH1    | 1 | psiblast       | 1i84S_  | 406 |
| YLR223C | IFH1    | 2 | msa            | na      | 350 |
| YLR223C | IFH1    | 3 | unassigned     | na      | 329 |
| YLR224W | YLR224W | 1 | unassigned     | na      | 369 |
| YLR225C | YLR225C | 1 | unassigned     | na      | 407 |
| YLR226W | BUR2    | 1 | unassigned     | na      | 395 |
| YLR227C | ADY4    | 1 | unassigned     | na      | 493 |
| YLR228C | ECM22   | 1 | psiblast       | 1pyiA_  | 161 |
| YLR228C | ECM22   | 2 | fold_recogniti | 1k83A   | 386 |
| YLR228C | ECM22   | 3 | msa            | na      | 109 |
| YLR228C | ECM22   | 4 | unassigned     | na      | 158 |
| YLR229C | CDC42   | 1 | psiblast       | 1grnA_  | 191 |
| YLR230W | YLR230W | 1 | unassigned     | na      | 101 |
| YLR231C | BNA5    | 1 | psiblast       | 1elqA_  | 341 |
| YLR231C | BNA5    | 2 | psiblast       | 1elqA_  | 112 |
| YLR232W | YLR232W | 1 | unassigned     | na      | 115 |

|         |         |   |                |         |     |
|---------|---------|---|----------------|---------|-----|
| YLR233C | EST1    | 1 | fold_recogniti | 1b89A   | 471 |
| YLR233C | EST1    | 2 | unassigned     | na      | 228 |
| YLR234W | TOP3    | 1 | psiblast       | 1ecl__  | 119 |
| YLR234W | TOP3    | 2 | psiblast       | 1ecl__  | 265 |
| YLR234W | TOP3    | 3 | psiblast       | 1ecl__  | 105 |
| YLR234W | TOP3    | 4 | psiblast       | 1ecl__  | 167 |
| YLR235C | YLR235C | 1 | unassigned     | na      | 132 |
| YLR236C | YLR236C | 1 | unassigned     | na      | 107 |
| YLR237W | THI7    | 1 | pfam           | PF02133 | 546 |
| YLR237W | THI7    | 2 | unassigned     | na      | 52  |
| YLR238W | FAR10   | 1 | unassigned     | na      | 112 |
| YLR238W | FAR10   | 2 | psiblast       | 1i84S_  | 366 |
| YLR239C | LIP2    | 1 | msa            | na      | 109 |
| YLR239C | LIP2    | 2 | pfam           | PF03099 | 158 |
| YLR239C | LIP2    | 3 | msa            | na      | 61  |
| YLR240W | VPS34   | 1 | psiblast       | 1e7uA_  | 707 |
| YLR240W | VPS34   | 2 | psiblast       | 1e7uA_  | 168 |
| YLR241W | YLR241W | 1 | msa            | na      | 326 |
| YLR241W | YLR241W | 2 | pfam           | PF02714 | 456 |
| YLR242C | ARV1    | 1 | msa            | na      | 135 |
| YLR242C | ARV1    | 2 | unassigned     | na      | 186 |
| YLR243W | YLR243W | 1 | psiblast       | 2ffhA_  | 272 |
| YLR244C | MAP1    | 1 | unassigned     | na      | 115 |
| YLR244C | MAP1    | 2 | psiblast       | 4matA_  | 272 |
| YLR245C | CDD1    | 1 | psiblast       | 1jtkA_  | 142 |
| YLR246W | ERF2    | 1 | unassigned     | na      | 163 |
| YLR246W | ERF2    | 2 | pfam           | PF01529 | 134 |
| YLR246W | ERF2    | 3 | unassigned     | na      | 62  |
| YLR247C | YLR247C | 1 | msa            | na      | 282 |
| YLR247C | YLR247C | 2 | pfam           | PF00176 | 436 |
| YLR247C | YLR247C | 3 | msa            | na      | 160 |
| YLR247C | YLR247C | 4 | unassigned     | na      | 358 |
| YLR247C | YLR247C | 5 | pfam           | PF00097 | 40  |
| YLR247C | YLR247C | 6 | psiblast       | 1hv8A_  | 200 |
| YLR247C | YLR247C | 7 | unassigned     | na      | 80  |
| YLR248W | RCK2    | 1 | unassigned     | na      | 120 |
| YLR248W | RCK2    | 2 | psiblast       | 1a06__  | 152 |
| YLR248W | RCK2    | 3 | psiblast       | 1a06__  | 260 |
| YLR248W | RCK2    | 4 | unassigned     | na      | 78  |
| YLR249W | YEF3    | 1 | fold_recogniti | 1lshA   | 71  |
| YLR249W | YEF3    | 2 | fold_recogniti | 1lshA   | 108 |
| YLR249W | YEF3    | 3 | fold_recogniti | 1lshA   | 145 |
| YLR249W | YEF3    | 4 | unassigned     | na      | 100 |
| YLR249W | YEF3    | 5 | psiblast       | 1g291_  | 238 |
| YLR249W | YEF3    | 6 | psiblast       | 1e69A_  | 124 |
| YLR249W | YEF3    | 7 | psiblast       | 1e69A_  | 189 |
| YLR249W | YEF3    | 8 | unassigned     | na      | 69  |
| YLR250W | SSP120  | 1 | psiblast       | 1bjfA_  | 144 |

|           |           |   |                |         |      |
|-----------|-----------|---|----------------|---------|------|
| YLR250W   | SSP120    | 2 | unassigned     | na      | 90   |
| YLR251W   | SYM1      | 1 | unassigned     | na      | 197  |
| YLR252W   | YLR252W   | 1 | unassigned     | na      | 101  |
| YLR253W   | YLR253W   | 1 | unassigned     | na      | 153  |
| YLR253W   | YLR253W   | 2 | psiblast       | 1f3mC_  | 147  |
| YLR253W   | YLR253W   | 3 | psiblast       | 1f3mC_  | 194  |
| YLR253W   | YLR253W   | 4 | unassigned     | na      | 75   |
| YLR254C   | YLR254C   | 1 | psiblast       | 1jchA_  | 189  |
| YLR255C   | YLR255C   | 1 | unassigned     | na      | 117  |
| YLR256W   | HAP1      | 1 | psiblast       | 1hwtD_  | 168  |
| YLR256W   | HAP1      | 2 | unassigned     | na      | 1334 |
| YLR257W   | YLR257W   | 1 | unassigned     | na      | 321  |
| YLR258W   | GSY2      | 1 | unassigned     | na      | 87   |
| YLR258W   | GSY2      | 2 | msa            | na      | 273  |
| YLR258W   | GSY2      | 3 | msa            | na      | 90   |
| YLR258W   | GSY2      | 4 | fold_recogniti | 1f6dA   | 203  |
| YLR258W   | GSY2      | 5 | unassigned     | na      | 52   |
| YLR259C   | HSP60     | 1 | psiblast       | 1iokA_  | 302  |
| YLR259C   | HSP60     | 2 | psiblast       | 1iokA_  | 270  |
| YLR260W   | LCB5      | 1 | unassigned     | na      | 201  |
| YLR260W   | LCB5      | 2 | pfam           | PF00781 | 211  |
| YLR260W   | LCB5      | 3 | msa            | na      | 179  |
| YLR260W   | LCB5      | 4 | unassigned     | na      | 96   |
| YLR261C   | VPS63     | 1 | unassigned     | na      | 108  |
| YLR262C   | YPT6      | 1 | psiblast       | 1d5cA_  | 215  |
| YLR262C-A | YLR262C-A | 1 | unassigned     | na      | 64   |
| YLR263W   | RED1      | 1 | fold_recogniti | 1be3C_  | 320  |
| YLR263W   | RED1      | 2 | unassigned     | na      | 89   |
| YLR263W   | RED1      | 3 | unassigned     | na      | 165  |
| YLR263W   | RED1      | 4 | msa            | na      | 163  |
| YLR263W   | RED1      | 5 | unassigned     | na      | 90   |
| YLR264C-A | YLR264C-A | 1 | unassigned     | na      | 38   |
| YLR264W   | RPS28B    | 1 | pfam           | PF01200 | 67   |
| YLR265C   | NEJ1      | 1 | unassigned     | na      | 342  |
| YLR266C   | PDR8      | 1 | psiblast       | 1hwtD_  | 101  |
| YLR266C   | PDR8      | 2 | unassigned     | na      | 68   |
| YLR266C   | PDR8      | 3 | msa            | na      | 277  |
| YLR266C   | PDR8      | 4 | unassigned     | na      | 61   |
| YLR266C   | PDR8      | 5 | msa            | na      | 194  |
| YLR267W   | BOP2      | 1 | unassigned     | na      | 570  |
| YLR268W   | SEC22     | 1 | psiblast       | 1ifqA_  | 125  |
| YLR268W   | SEC22     | 2 | psiblast       | 1gl2A_  | 89   |
| YLR269C   | YLR269C   | 1 | unassigned     | na      | 116  |
| YLR270W   | DCS1      | 1 | unassigned     | na      | 157  |
| YLR270W   | DCS1      | 2 | fold_recogniti | 1av5A   | 193  |
| YLR271W   | YLR271W   | 1 | pfam           | PF01585 | 139  |
| YLR271W   | YLR271W   | 2 | msa            | na      | 135  |
| YLR272C   | YCS4      | 1 | fold_recogniti | 1ejll   | 129  |

|           |         |    |                |         |     |
|-----------|---------|----|----------------|---------|-----|
| YLR272C   | YCS4    | 2  | fold_recogniti | 1ejll   | 62  |
| YLR272C   | YCS4    | 3  | fold_recogniti | 1ejll   | 62  |
| YLR272C   | YCS4    | 4  | fold_recogniti | 1jpwA   | 146 |
| YLR272C   | YCS4    | 5  | fold_recogniti | 1jpwA   | 127 |
| YLR272C   | YCS4    | 6  | fold_recogniti | 1jpwA   | 123 |
| YLR272C   | YCS4    | 7  | fold_recogniti | 1jpwA   | 54  |
| YLR272C   | YCS4    | 8  | fold_recogniti | 1jpwA   | 184 |
| YLR272C   | YCS4    | 9  | unassigned     | na      | 58  |
| YLR272C   | YCS4    | 10 | psiblast       | 1gw5B_  | 231 |
| YLR273C   | PIG1    | 1  | unassigned     | na      | 140 |
| YLR273C   | PIG1    | 2  | pfam           | PF03370 | 227 |
| YLR273C   | PIG1    | 3  | unassigned     | na      | 281 |
| YLR274W   | CDC46   | 1  | msa            | na      | 122 |
| YLR274W   | CDC46   | 2  | pfam           | PF00493 | 251 |
| YLR274W   | CDC46   | 3  | psiblast       | 1g8pA_  | 233 |
| YLR274W   | CDC46   | 4  | psiblast       | 1g8pA_  | 169 |
| YLR275W   | SMD2    | 1  | psiblast       | 1b34B_  | 110 |
| YLR276C   | DBP9    | 1  | psiblast       | 1hv8A_  | 242 |
| YLR276C   | DBP9    | 2  | psiblast       | 1hv8A_  | 148 |
| YLR276C   | DBP9    | 3  | psiblast       | 1d2mA_  | 96  |
| YLR276C   | DBP9    | 4  | msa            | na      | 108 |
| YLR277C   | YSH1    | 1  | psiblast       | 1smlA_  | 170 |
| YLR277C   | YSH1    | 2  | msa            | na      | 261 |
| YLR277C   | YSH1    | 3  | msa            | na      | 98  |
| YLR277C   | YSH1    | 4  | msa            | na      | 250 |
| YLR278C   | YLR278C | 1  | psiblast       | 1pyiA_  | 185 |
| YLR278C   | YLR278C | 2  | unassigned     | na      | 79  |
| YLR278C   | YLR278C | 3  | msa            | na      | 417 |
| YLR278C   | YLR278C | 4  | msa            | na      | 660 |
| YLR279W   | YLR279W | 1  | unassigned     | na      | 129 |
| YLR280C   | YLR280C | 1  | unassigned     | na      | 116 |
| YLR281C   | YLR281C | 1  | psiblast       | 1gqeA_  | 155 |
| YLR282C   | YLR282C | 1  | unassigned     | na      | 113 |
| YLR283W   | YLR283W | 1  | msa            | na      | 314 |
| YLR284C   | EC11    | 1  | psiblast       | 1hnoA_  | 280 |
| YLR285W   | NNT1    | 1  | psiblast       | 1f3IA_  | 261 |
| YLR286C   | CTS1    | 1  | psiblast       | 1hvq__  | 303 |
| YLR286C   | CTS1    | 2  | fold_recogniti | 1m2vB   | 259 |
| YLR287C   | YLR287C | 1  | fold_recogniti | 1dofA   | 98  |
| YLR287C   | YLR287C | 2  | fold_recogniti | 1dofA   | 257 |
| YLR287C-A | RPS30A  | 1  | unassigned     | na      | 63  |
| YLR288C   | MEC3    | 1  | unassigned     | na      | 474 |
| YLR289W   | GUF1    | 1  | psiblast       | 1dar__  | 304 |
| YLR289W   | GUF1    | 2  | psiblast       | 1dar__  | 265 |
| YLR289W   | GUF1    | 3  | unassigned     | na      | 76  |
| YLR290C   | YLR290C | 1  | psiblast       | 1lrkA_  | 229 |
| YLR290C   | YLR290C | 2  | psiblast       | 1lrkA_  | 48  |
| YLR291C   | GCD7    | 1  | msa            | na      | 137 |

|           |         |   |                |         |     |
|-----------|---------|---|----------------|---------|-----|
| YLR291C   | GCD7    | 2 | fold_recogniti | 1m0sA   | 180 |
| YLR291C   | GCD7    | 3 | fold_recogniti | 1m0sA   | 64  |
| YLR292C   | SEC72   | 1 | unassigned     | na      | 139 |
| YLR292C   | SEC72   | 2 | pfam           | PF00515 | 54  |
| YLR293C   | GSP1    | 1 | psiblast       | 1a2kC_  | 219 |
| YLR294C   | YLR294C | 1 | unassigned     | na      | 109 |
| YLR295C   | ATP14   | 1 | unassigned     | na      | 124 |
| YLR296W   | YLR296W | 1 | unassigned     | na      | 108 |
| YLR297W   | YLR297W | 1 | unassigned     | na      | 129 |
| YLR298C   | YHC1    | 1 | msa            | na      | 69  |
| YLR298C   | YHC1    | 2 | unassigned     | na      | 162 |
| YLR299W   | ECM38   | 1 | fold_recogniti | 1itwA   | 274 |
| YLR299W   | ECM38   | 2 | fold_recogniti | 1itwA   | 166 |
| YLR299W   | ECM38   | 3 | fold_recogniti | 9gaaA   | 220 |
| YLR300W   | EXG1    | 1 | psiblast       | 1cz1A_  | 328 |
| YLR300W   | EXG1    | 2 | psiblast       | 1cz1A_  | 120 |
| YLR301W   | YLR301W | 1 | unassigned     | na      | 244 |
| YLR302C   | YLR302C | 1 | unassigned     | na      | 120 |
| YLR303W   | MET17   | 1 | psiblast       | 1gc0A_  | 296 |
| YLR303W   | MET17   | 2 | psiblast       | 1gc0A_  | 148 |
| YLR304C   | ACO1    | 1 | psiblast       | 5acn__  | 577 |
| YLR304C   | ACO1    | 2 | psiblast       | 5acn__  | 201 |
| YLR305C   | STT4    | 1 | unassigned     | na      | 505 |
| YLR305C   | STT4    | 2 | msa            | na      | 312 |
| YLR305C   | STT4    | 3 | unassigned     | na      | 463 |
| YLR305C   | STT4    | 4 | psiblast       | 1he8A_  | 264 |
| YLR305C   | STT4    | 5 | psiblast       | 1he8A_  | 131 |
| YLR305C   | STT4    | 6 | psiblast       | 1he8A_  | 225 |
| YLR306W   | UBC12   | 1 | psiblast       | 2aak__  | 188 |
| YLR307W   | CDA1    | 1 | unassigned     | na      | 106 |
| YLR307W   | CDA1    | 2 | pfam           | PF01522 | 195 |
| YLR308W   | CDA2    | 1 | unassigned     | na      | 114 |
| YLR308W   | CDA2    | 2 | pfam           | PF01522 | 198 |
| YLR309C   | IMH1    | 1 | psiblast       | 1i84S_  | 336 |
| YLR309C   | IMH1    | 2 | msa            | na      | 216 |
| YLR309C   | IMH1    | 3 | psiblast       | 2tmaA_  | 84  |
| YLR309C   | IMH1    | 4 | psiblast       | 2tmaA_  | 83  |
| YLR309C   | IMH1    | 5 | psiblast       | 2tmaA_  | 62  |
| YLR309C   | IMH1    | 6 | psiblast       | 2tmaA_  | 130 |
| YLR310C   | CDC25   | 1 | psiblast       | 2ptk__  | 129 |
| YLR310C   | CDC25   | 2 | psiblast       | 2ptk__  | 127 |
| YLR310C   | CDC25   | 3 | unassigned     | na      | 719 |
| YLR310C   | CDC25   | 4 | psiblast       | 1awe__  | 104 |
| YLR310C   | CDC25   | 5 | psiblast       | 1bkdS_  | 212 |
| YLR310C   | CDC25   | 6 | psiblast       | 1bkdS_  | 298 |
| YLR311C   | YLR311C | 1 | unassigned     | na      | 115 |
| YLR312C   | YLR312C | 1 | unassigned     | na      | 398 |
| YLR312W-A | MRPL15  | 1 | unassigned     | na      | 253 |

|         |         |   |                |         |      |
|---------|---------|---|----------------|---------|------|
| YLR313C | SPH1    | 1 | fold_recogniti | 1itwA   | 115  |
| YLR313C | SPH1    | 2 | fold_recogniti | 1itwA   | 135  |
| YLR313C | SPH1    | 3 | fold_recogniti | 1itwA   | 280  |
| YLR314C | CDC3    | 1 | msa            | na      | 90   |
| YLR314C | CDC3    | 2 | psiblast       | 1jnyA_  | 148  |
| YLR314C | CDC3    | 3 | unassigned     | na      | 52   |
| YLR314C | CDC3    | 4 | psiblast       | 1e5wA_  | 148  |
| YLR314C | CDC3    | 5 | psiblast       | 1dg3A_  | 82   |
| YLR315W | NKP2    | 1 | fold_recogniti | 1b68A   | 153  |
| YLR316C | TAD3    | 1 | fold_recogniti | 1jtkA   | 163  |
| YLR317W | YLR317W | 1 | unassigned     | na      | 144  |
| YLR318W | EST2    | 1 | unassigned     | na      | 301  |
| YLR318W | EST2    | 2 | msa            | na      | 283  |
| YLR318W | EST2    | 3 | psiblast       | 1d0eA_  | 189  |
| YLR318W | EST2    | 4 | unassigned     | na      | 111  |
| YLR319C | BUD6    | 1 | unassigned     | na      | 79   |
| YLR319C | BUD6    | 2 | psiblast       | 1jchA_  | 200  |
| YLR319C | BUD6    | 3 | psiblast       | 1i84S_  | 339  |
| YLR319C | BUD6    | 4 | psiblast       | 2tmaA_  | 170  |
| YLR320W | MMS22   | 1 | unassigned     | na      | 1454 |
| YLR321C | SFH1    | 1 | unassigned     | na      | 137  |
| YLR321C | SFH1    | 2 | msa            | na      | 289  |
| YLR322W | VPS65   | 1 | unassigned     | na      | 104  |
| YLR323C | CWC24   | 1 | msa            | na      | 168  |
| YLR323C | CWC24   | 2 | psiblast       | 1rmd__  | 91   |
| YLR324W | PEX30   | 1 | unassigned     | na      | 282  |
| YLR324W | PEX30   | 2 | msa            | na      | 154  |
| YLR324W | PEX30   | 3 | unassigned     | na      | 87   |
| YLR325C | RPL38   | 1 | pfam           | PF01781 | 78   |
| YLR326W | YLR326W | 1 | unassigned     | na      | 240  |
| YLR327C | YLR327C | 1 | unassigned     | na      | 86   |
| YLR328W | NMA1    | 1 | unassigned     | na      | 111  |
| YLR328W | NMA1    | 2 | psiblast       | 1kkuA_  | 290  |
| YLR329W | REC102  | 1 | unassigned     | na      | 200  |
| YLR330W | CHS5    | 1 | unassigned     | na      | 80   |
| YLR330W | CHS5    | 2 | fold_recogniti | 1jv2B   | 281  |
| YLR330W | CHS5    | 3 | fold_recogniti | 1jv2B   | 140  |
| YLR330W | CHS5    | 4 | fold_recogniti | 1jv2B   | 87   |
| YLR330W | CHS5    | 5 | fold_recogniti | 1l8mA   | 83   |
| YLR331C | JIP3    | 1 | unassigned     | na      | 125  |
| YLR332W | MID2    | 1 | fold_recogniti | 1m2vB   | 324  |
| YLR332W | MID2    | 2 | unassigned     | na      | 52   |
| YLR333C | RPS25B  | 1 | pfam           | PF03297 | 108  |
| YLR334C | YLR334C | 1 | unassigned     | na      | 126  |
| YLR335W | NUP2    | 1 | unassigned     | na      | 149  |
| YLR335W | NUP2    | 2 | fold_recogniti | 1m2vB   | 124  |
| YLR335W | NUP2    | 3 | fold_recogniti | 1l8mA   | 87   |
| YLR335W | NUP2    | 4 | fold_recogniti | 1l8mA   | 73   |



|         |         |   |                |         |     |
|---------|---------|---|----------------|---------|-----|
| YLR335W | NUP2    | 5 | fold_recogniti | 1l8mA   | 82  |
| YLR335W | NUP2    | 6 | fold_recogniti | 1l8mA   | 70  |
| YLR335W | NUP2    | 7 | psiblast       | 1rrpB_  | 135 |
| YLR336C | SGD1    | 1 | msa            | na      | 309 |
| YLR336C | SGD1    | 2 | psiblast       | 1hu3A_  | 133 |
| YLR336C | SGD1    | 3 | psiblast       | 1hu3A_  | 153 |
| YLR336C | SGD1    | 4 | msa            | na      | 242 |
| YLR336C | SGD1    | 5 | unassigned     | na      | 62  |
| YLR337C | VRP1    | 1 | msa            | na      | 601 |
| YLR337C | VRP1    | 2 | unassigned     | na      | 99  |
| YLR337C | VRP1    | 3 | msa            | na      | 117 |
| YLR338W | YLR338W | 1 | fold_recogniti | 1la5A   | 188 |
| YLR338W | YLR338W | 2 | unassigned     | na      | 97  |
| YLR339C | YLR339C | 1 | unassigned     | na      | 183 |
| YLR340W | RPP0    | 1 | psiblast       | 1jj2G_  | 312 |
| YLR341W | SPO77   | 1 | unassigned     | na      | 477 |
| YLR342W | FKS1    | 1 | msa            | na      | 153 |
| YLR342W | FKS1    | 2 | msa            | na      | 235 |
| YLR342W | FKS1    | 3 | unassigned     | na      | 414 |
| YLR342W | FKS1    | 4 | pfam           | PF02364 | 864 |
| YLR342W | FKS1    | 5 | msa            | na      | 210 |
| YLR343W | YLR343W | 1 | fold_recogniti | 1lf1A   | 283 |
| YLR343W | YLR343W | 2 | unassigned     | na      | 63  |
| YLR343W | YLR343W | 3 | msa            | na      | 209 |
| YLR344W | RPL26A  | 1 | psiblast       | 1k5yU_  | 127 |
| YLR345W | YLR345W | 1 | psiblast       | 1bif__  | 289 |
| YLR345W | YLR345W | 2 | psiblast       | 1bif__  | 220 |
| YLR346C | YLR346C | 1 | unassigned     | na      | 101 |
| YLR347C | KAP95   | 1 | psiblast       | 1qgkA_  | 248 |
| YLR347C | KAP95   | 2 | psiblast       | 1qgkA_  | 194 |
| YLR347C | KAP95   | 3 | psiblast       | 1qgkA_  | 99  |
| YLR347C | KAP95   | 4 | psiblast       | 1qgkA_  | 107 |
| YLR347C | KAP95   | 5 | psiblast       | 1qgkA_  | 213 |
| YLR348C | DIC1    | 1 | fold_recogniti | 1is2A   | 298 |
| YLR349W | YLR349W | 1 | unassigned     | na      | 168 |
| YLR350W | ORM2    | 1 | msa            | na      | 216 |
| YLR351C | NIT3    | 1 | psiblast       | 1f89A_  | 291 |
| YLR352W | YLR352W | 1 | msa            | na      | 606 |
| YLR352W | YLR352W | 2 | unassigned     | na      | 201 |
| YLR353W | BUD8    | 1 | unassigned     | na      | 64  |
| YLR353W | BUD8    | 2 | fold_recogniti | 1jv2B   | 354 |
| YLR353W | BUD8    | 3 | fold_recogniti | 1jv2B   | 122 |
| YLR353W | BUD8    | 4 | unassigned     | na      | 63  |
| YLR354C | TAL1    | 1 | psiblast       | 1f05A_  | 335 |
| YLR355C | ILV5    | 1 | psiblast       | 1qmgA_  | 395 |
| YLR356W | YLR356W | 1 | unassigned     | na      | 197 |
| YLR357W | RSC2    | 1 | psiblast       | 1e6iA_  | 189 |
| YLR357W | RSC2    | 2 | unassigned     | na      | 86  |

|           |           |   |                |         |     |
|-----------|-----------|---|----------------|---------|-----|
| YLR357W   | RSC2      | 3 | pfam           | PF00439 | 118 |
| YLR357W   | RSC2      | 4 | pfam           | PF01426 | 171 |
| YLR357W   | RSC2      | 5 | msa            | na      | 118 |
| YLR357W   | RSC2      | 6 | unassigned     | na      | 207 |
| YLR358C   | YLR358C   | 1 | unassigned     | na      | 187 |
| YLR359W   | ADE13     | 1 | psiblast       | 1f1oA_  | 166 |
| YLR359W   | ADE13     | 2 | psiblast       | 1f1oA_  | 97  |
| YLR359W   | ADE13     | 3 | psiblast       | 1f1oA_  | 219 |
| YLR360W   | VPS38     | 1 | unassigned     | na      | 128 |
| YLR360W   | VPS38     | 2 | psiblast       | 1i84S_  | 186 |
| YLR360W   | VPS38     | 3 | unassigned     | na      | 125 |
| YLR361C   | DCR2      | 1 | unassigned     | na      | 122 |
| YLR361C   | DCR2      | 2 | psiblast       | 1kbpA_  | 203 |
| YLR361C   | DCR2      | 3 | psiblast       | 1kbpA_  | 253 |
| YLR362W   | STE11     | 1 | fold_recogniti | 1b0xA   | 136 |
| YLR362W   | STE11     | 2 | psiblast       | 1f3mA_  | 96  |
| YLR362W   | STE11     | 3 | unassigned     | na      | 137 |
| YLR362W   | STE11     | 4 | psiblast       | 1f3mC_  | 187 |
| YLR362W   | STE11     | 5 | psiblast       | 1f3mC_  | 182 |
| YLR363C   | NMD4      | 1 | unassigned     | na      | 218 |
| YLR363W-A | YLR363W-A | 1 | unassigned     | na      | 85  |
| YLR364W   | YLR364W   | 1 | psiblast       | 1jhb__  | 109 |
| YLR365W   | YLR365W   | 1 | unassigned     | na      | 110 |
| YLR366W   | YLR366W   | 1 | unassigned     | na      | 101 |
| YLR367W   | RPS22B    | 1 | psiblast       | 1k5xH_  | 79  |
| YLR367W   | RPS22B    | 2 | psiblast       | 1k5xH_  | 51  |
| YLR368W   | MDM30     | 1 | pfam           | PF00646 | 75  |
| YLR368W   | MDM30     | 2 | unassigned     | na      | 523 |
| YLR369W   | SSQ1      | 1 | psiblast       | 1hpm__  | 226 |
| YLR369W   | SSQ1      | 2 | psiblast       | 1hpm__  | 115 |
| YLR369W   | SSQ1      | 3 | psiblast       | 1hpm__  | 79  |
| YLR369W   | SSQ1      | 4 | psiblast       | 1bpr__  | 237 |
| YLR370C   | ARC18     | 1 | psiblast       | 1k8kE_  | 71  |
| YLR370C   | ARC18     | 2 | psiblast       | 1k8kE_  | 107 |
| YLR371W   | ROM2      | 1 | fold_recogniti | 1ldvA   | 137 |
| YLR371W   | ROM2      | 2 | fold_recogniti | 1m2vB   | 394 |
| YLR371W   | ROM2      | 3 | unassigned     | na      | 110 |
| YLR371W   | ROM2      | 4 | psiblast       | 1ki1B_  | 208 |
| YLR371W   | ROM2      | 5 | psiblast       | 1ki1B_  | 183 |
| YLR371W   | ROM2      | 6 | pfam           | PF00780 | 324 |
| YLR372W   | SUR4      | 1 | pfam           | PF01151 | 345 |
| YLR373C   | VID22     | 1 | msa            | na      | 672 |
| YLR373C   | VID22     | 2 | unassigned     | na      | 229 |
| YLR374C   | YLR374C   | 1 | unassigned     | na      | 129 |
| YLR375W   | STP3      | 1 | psiblast       | 1tf3A_  | 84  |
| YLR375W   | STP3      | 2 | psiblast       | 1a1fA_  | 53  |
| YLR375W   | STP3      | 3 | psiblast       | 1f2iG_  | 60  |
| YLR375W   | STP3      | 4 | msa            | na      | 146 |

|         |         |    |                |         |     |
|---------|---------|----|----------------|---------|-----|
| YLR376C | PSY3    | 1  | unassigned     | na      | 242 |
| YLR377C | FBP1    | 1  | psiblast       | 1bk4A_  | 209 |
| YLR377C | FBP1    | 2  | psiblast       | 1bk4A_  | 139 |
| YLR378C | SEC61   | 1  | msa            | na      | 72  |
| YLR378C | SEC61   | 2  | pfam           | PF00344 | 408 |
| YLR379W | YLR379W | 1  | unassigned     | na      | 124 |
| YLR380W | CSR1    | 1  | unassigned     | na      | 52  |
| YLR380W | CSR1    | 2  | psiblast       | 1aua__  | 82  |
| YLR380W | CSR1    | 3  | psiblast       | 1aua__  | 274 |
| YLR381W | CTF3    | 1  | fold_recogniti | 1b3uA   | 178 |
| YLR381W | CTF3    | 2  | fold_recogniti | 1b3uA   | 73  |
| YLR381W | CTF3    | 3  | fold_recogniti | 1b3uA   | 129 |
| YLR381W | CTF3    | 4  | fold_recogniti | 1b3uA   | 218 |
| YLR381W | CTF3    | 5  | unassigned     | na      | 135 |
| YLR382C | NAM2    | 1  | psiblast       | 1ffyA_  | 152 |
| YLR382C | NAM2    | 2  | psiblast       | 1ffyA_  | 238 |
| YLR382C | NAM2    | 3  | psiblast       | 1ffyA_  | 261 |
| YLR382C | NAM2    | 4  | psiblast       | 1ffyA_  | 243 |
| YLR383W | RHC18   | 1  | unassigned     | na      | 69  |
| YLR383W | RHC18   | 2  | psiblast       | 1f2tA_  | 102 |
| YLR383W | RHC18   | 3  | psiblast       | 1i84S_  | 335 |
| YLR383W | RHC18   | 4  | fold_recogniti | 1gxIA   | 65  |
| YLR383W | RHC18   | 5  | fold_recogniti | 1gxIA   | 87  |
| YLR383W | RHC18   | 6  | fold_recogniti | 1gxIA   | 58  |
| YLR383W | RHC18   | 7  | psiblast       | 2tmaA_  | 56  |
| YLR383W | RHC18   | 8  | psiblast       | 2tmaA_  | 82  |
| YLR383W | RHC18   | 9  | psiblast       | 2tmaA_  | 63  |
| YLR383W | RHC18   | 10 | psiblast       | 2tmaA_  | 92  |
| YLR383W | RHC18   | 11 | psiblast       | 1e69A_  | 105 |
| YLR384C | IKI3    | 1  | psiblast       | 1gxrA_  | 111 |
| YLR384C | IKI3    | 2  | psiblast       | 1gg2B_  | 314 |
| YLR384C | IKI3    | 3  | psiblast       | 1erjA_  | 202 |
| YLR384C | IKI3    | 4  | unassigned     | na      | 209 |
| YLR384C | IKI3    | 5  | fold_recogniti | 1qqeA   | 198 |
| YLR384C | IKI3    | 6  | fold_recogniti | 1qqeA   | 154 |
| YLR384C | IKI3    | 7  | msa            | na      | 161 |
| YLR385C | SWC7    | 1  | unassigned     | na      | 132 |
| YLR386W | VAC14   | 1  | unassigned     | na      | 199 |
| YLR386W | VAC14   | 2  | fold_recogniti | 1b89A   | 454 |
| YLR386W | VAC14   | 3  | msa            | na      | 227 |
| YLR387C | YLR387C | 1  | psiblast       | 1meyG_  | 96  |
| YLR387C | YLR387C | 2  | msa            | na      | 193 |
| YLR387C | YLR387C | 3  | unassigned     | na      | 143 |
| YLR388W | RPS29A  | 1  | pfam           | PF00253 | 56  |
| YLR389C | STE23   | 1  | unassigned     | na      | 69  |
| YLR389C | STE23   | 2  | psiblast       | 1hr6B_  | 241 |
| YLR389C | STE23   | 3  | psiblast       | 1hr6B_  | 244 |
| YLR389C | STE23   | 4  | msa            | na      | 434 |

|           |         |   |                |         |     |
|-----------|---------|---|----------------|---------|-----|
| YLR390W   | ECM19   | 1 | unassigned     | na      | 112 |
| YLR390W-A | CCW14   | 1 | fold_recogniti | 1m2vB   | 238 |
| YLR392C   | YLR392C | 1 | msa            | na      | 236 |
| YLR392C   | YLR392C | 2 | unassigned     | na      | 282 |
| YLR393W   | ATP10   | 1 | unassigned     | na      | 279 |
| YLR394W   | CST9    | 1 | fold_recogniti | 1jm7B   | 188 |
| YLR394W   | CST9    | 2 | unassigned     | na      | 294 |
| YLR395C   | COX8    | 1 | unassigned     | na      | 78  |
| YLR396C   | VPS33   | 1 | psiblast       | 1fvfA_  | 240 |
| YLR396C   | VPS33   | 2 | psiblast       | 1fvfA_  | 156 |
| YLR396C   | VPS33   | 3 | psiblast       | 1fvfA_  | 213 |
| YLR396C   | VPS33   | 4 | msa            | na      | 82  |
| YLR397C   | AFG2    | 1 | psiblast       | 1e32A_  | 120 |
| YLR397C   | AFG2    | 2 | psiblast       | 1e32A_  | 121 |
| YLR397C   | AFG2    | 3 | psiblast       | 1e32A_  | 172 |
| YLR397C   | AFG2    | 4 | psiblast       | 1e32A_  | 78  |
| YLR397C   | AFG2    | 5 | psiblast       | 1d2nA_  | 176 |
| YLR397C   | AFG2    | 6 | fold_recogniti | 1iy2A   | 113 |
| YLR398C   | SKI2    | 1 | msa            | na      | 170 |
| YLR398C   | SKI2    | 2 | unassigned     | na      | 104 |
| YLR398C   | SKI2    | 3 | psiblast       | 1fuuA_  | 393 |
| YLR398C   | SKI2    | 4 | psiblast       | 1c4oA_  | 224 |
| YLR398C   | SKI2    | 5 | unassigned     | na      | 73  |
| YLR398C   | SKI2    | 6 | fold_recogniti | 1n1bA   | 323 |
| YLR399C   | BDF1    | 1 | fold_recogniti | 1ldvA   | 151 |
| YLR399C   | BDF1    | 2 | pfam           | PF00439 | 118 |
| YLR399C   | BDF1    | 3 | psiblast       | 1e6iA_  | 203 |
| YLR399C   | BDF1    | 4 | unassigned     | na      | 55  |
| YLR399C   | BDF1    | 5 | msa            | na      | 159 |
| YLR400W   | YLR400W | 1 | unassigned     | na      | 157 |
| YLR401C   | DUS3    | 1 | msa            | na      | 257 |
| YLR401C   | DUS3    | 2 | psiblast       | 1ep1A_  | 352 |
| YLR402W   | YLR402W | 1 | unassigned     | na      | 171 |
| YLR403W   | SFP1    | 1 | unassigned     | na      | 113 |
| YLR403W   | SFP1    | 2 | msa            | na      | 210 |
| YLR403W   | SFP1    | 3 | psiblast       | 1meyG_  | 111 |
| YLR403W   | SFP1    | 4 | msa            | na      | 77  |
| YLR403W   | SFP1    | 5 | psiblast       | 2gliA_  | 78  |
| YLR403W   | SFP1    | 6 | psiblast       | 2gliA_  | 94  |
| YLR404W   | YLR404W | 1 | unassigned     | na      | 285 |
| YLR405W   | DUS4    | 1 | psiblast       | 1ep1A_  | 279 |
| YLR405W   | DUS4    | 2 | psiblast       | 1h5yA_  | 88  |
| YLR406C   | RPL31B  | 1 | psiblast       | 1k5yW_  | 113 |
| YLR407W   | YLR407W | 1 | unassigned     | na      | 229 |
| YLR408C   | YLR408C | 1 | unassigned     | na      | 122 |
| YLR409C   | UTP21   | 1 | psiblast       | 1gg2B_  | 315 |
| YLR409C   | UTP21   | 2 | psiblast       | 1gxrA_  | 342 |
| YLR409C   | UTP21   | 3 | psiblast       | 1erjA_  | 89  |

|         |         |   |                |         |      |
|---------|---------|---|----------------|---------|------|
| YLR409C | UTP21   | 4 | msa            | na      | 193  |
| YLR410W | VIP1    | 1 | unassigned     | na      | 234  |
| YLR410W | VIP1    | 2 | psiblast       | 2dln__  | 286  |
| YLR410W | VIP1    | 3 | fold_recogniti | 1qfxA   | 124  |
| YLR410W | VIP1    | 4 | fold_recogniti | 1qfxA   | 104  |
| YLR410W | VIP1    | 5 | unassigned     | na      | 398  |
| YLR411W | CTR3    | 1 | msa            | na      | 75   |
| YLR411W | CTR3    | 2 | msa            | na      | 166  |
| YLR412W | YLR412W | 1 | msa            | na      | 194  |
| YLR412W | YLR412W | 2 | unassigned     | na      | 80   |
| YLR413W | YLR413W | 1 | fold_recogniti | 1ei3A   | 73   |
| YLR413W | YLR413W | 2 | fold_recogniti | 1k83A   | 401  |
| YLR413W | YLR413W | 3 | unassigned     | na      | 201  |
| YLR414C | YLR414C | 1 | unassigned     | na      | 263  |
| YLR415C | YLR415C | 1 | unassigned     | na      | 112  |
| YLR416C | YLR416C | 1 | unassigned     | na      | 132  |
| YLR417W | VPS36   | 1 | unassigned     | na      | 147  |
| YLR417W | VPS36   | 2 | msa            | na      | 419  |
| YLR418C | CDC73   | 1 | unassigned     | na      | 133  |
| YLR418C | CDC73   | 2 | msa            | na      | 260  |
| YLR419W | YLR419W | 1 | unassigned     | na      | 122  |
| YLR419W | YLR419W | 2 | msa            | na      | 127  |
| YLR419W | YLR419W | 3 | unassigned     | na      | 105  |
| YLR419W | YLR419W | 4 | pfam           | PF00627 | 57   |
| YLR419W | YLR419W | 5 | msa            | na      | 156  |
| YLR419W | YLR419W | 6 | psiblast       | 1hv8A_  | 251  |
| YLR419W | YLR419W | 7 | psiblast       | 1hv8A_  | 181  |
| YLR419W | YLR419W | 8 | msa            | na      | 310  |
| YLR419W | YLR419W | 9 | msa            | na      | 126  |
| YLR420W | URA4    | 1 | psiblast       | 1j79A_  | 364  |
| YLR421C | RPN13   | 1 | unassigned     | na      | 156  |
| YLR422W | YLR422W | 1 | unassigned     | na      | 1253 |
| YLR422W | YLR422W | 2 | msa            | na      | 603  |
| YLR422W | YLR422W | 3 | unassigned     | na      | 76   |
| YLR423C | ATG17   | 1 | psiblast       | 1gojA_  | 255  |
| YLR423C | ATG17   | 2 | fold_recogniti | 1i84S   | 162  |
| YLR424W | YLR424W | 1 | pfam           | PF01585 | 111  |
| YLR424W | YLR424W | 2 | unassigned     | na      | 82   |
| YLR424W | YLR424W | 3 | msa            | na      | 515  |
| YLR425W | TUS1    | 1 | fold_recogniti | 1m2vB   | 304  |
| YLR425W | TUS1    | 2 | unassigned     | na      | 138  |
| YLR425W | TUS1    | 3 | psiblast       | 1ki1B_  | 218  |
| YLR425W | TUS1    | 4 | psiblast       | 1ki1B_  | 167  |
| YLR425W | TUS1    | 5 | msa            | na      | 480  |
| YLR426W | YLR426W | 1 | psiblast       | 1i01A_  | 326  |
| YLR427W | MAG2    | 1 | msa            | na      | 148  |
| YLR427W | MAG2    | 2 | psiblast       | 1jm7B_  | 128  |
| YLR427W | MAG2    | 3 | psiblast       | 1fre__  | 38   |

|           |         |   |                |           |      |
|-----------|---------|---|----------------|-----------|------|
| YLR427W   | MAG2    | 4 | msa            | na        | 179  |
| YLR427W   | MAG2    | 5 | unassigned     | na        | 177  |
| YLR428C   | YLR428C | 1 | unassigned     | na        | 114  |
| YLR429W   | CRN1    | 1 | unassigned     | na        | 70   |
| YLR429W   | CRN1    | 2 | psiblast       | 1erjA_    | 320  |
| YLR429W   | CRN1    | 3 | psiblast       | 1gxrA_    | 76   |
| YLR429W   | CRN1    | 4 | fold_recogniti | 1k83A     | 185  |
| YLR430W   | SEN1    | 1 | unassigned     | na        | 1122 |
| YLR430W   | SEN1    | 2 | msa            | na        | 198  |
| YLR430W   | SEN1    | 3 | psiblast       | 1pjr__    | 335  |
| YLR430W   | SEN1    | 4 | psiblast       | 1pjr__    | 378  |
| YLR430W   | SEN1    | 5 | unassigned     | na        | 198  |
| YLR431C   | ATG23   | 1 | psiblast       | 1i84S_    | 122  |
| YLR431C   | ATG23   | 2 | msa            | na        | 139  |
| YLR431C   | ATG23   | 3 | psiblast       | 1gk4A_    | 192  |
| YLR432W   | IMD3    | 1 | psiblast       | 1jr1A_    | 523  |
| YLR433C   | CNA1    | 1 | psiblast       | 1auiA_    | 553  |
| YLR434C   | YLR434C | 1 | unassigned     | na        | 127  |
| YLR435W   | TSR2    | 1 | msa            | na        | 249  |
| YLR436C   | ECM30   | 1 | msa            | na        | 406  |
| YLR436C   | ECM30   | 2 | unassigned     | na        | 868  |
| YLR437C   | YLR437C | 1 | unassigned     | na        | 133  |
| YLR438C-A | LSM3    | 1 | psiblast       | 1i81A_    | 89   |
| YLR438W   | CAR2    | 1 | psiblast       | 2canA_    | 424  |
| YLR439W   | MRPL4   | 1 | unassigned     | na        | 85   |
| YLR439W   | MRPL4   | 2 | fold_recogniti | 1ffkS     | 106  |
| YLR439W   | MRPL4   | 3 | unassigned     | na        | 128  |
| YLR440C   | SEC39   | 1 | fold_recogniti | 1qgkA     | 285  |
| YLR440C   | SEC39   | 2 | fold_recogniti | 1qgkA     | 104  |
| YLR440C   | SEC39   | 3 | fold_recogniti | 1qgkA     | 109  |
| YLR440C   | SEC39   | 4 | fold_recogniti | 1qgkA     | 211  |
| YLR441C   | RPS1A   | 1 | pfam           | PF01015   | 255  |
| YLR442C   | SIR3    | 1 | psiblast       | 1i84S_    | 339  |
| YLR442C   | SIR3    | 2 | unassigned     | na        | 181  |
| YLR442C   | SIR3    | 3 | psiblast       | 1fnnA_    | 143  |
| YLR442C   | SIR3    | 4 | psiblast       | 1fnnA_    | 315  |
| YLR443W   | ECM7    | 1 | unassigned     | na        | 448  |
| YLR444C   | YLR444C | 1 | unassigned     | na        | 100  |
| YLR445W   | YLR445W | 1 | unassigned     | na        | 134  |
| YLR446W   | YLR446W | 1 | psiblast       | 1bg3_B: 1 | 433  |
| YLR447C   | VMA6    | 1 | fold_recogniti | 1b89A     | 345  |
| YLR448W   | RPL6B   | 1 | pfam           | PF01159   | 176  |
| YLR449W   | FPR4    | 1 | fold_recogniti | 1i8mA     | 71   |
| YLR449W   | FPR4    | 2 | fold_recogniti | 1i8mA     | 79   |
| YLR449W   | FPR4    | 3 | fold_recogniti | 1i8mA     | 70   |
| YLR449W   | FPR4    | 4 | fold_recogniti | 1i8mA     | 63   |
| YLR449W   | FPR4    | 5 | psiblast       | 1yat__    | 109  |
| YLR450W   | HMG2    | 1 | unassigned     | na        | 66   |

|         |         |   |                |         |      |
|---------|---------|---|----------------|---------|------|
| YLR450W | HMG2    | 2 | msa            | na      | 467  |
| YLR450W | HMG2    | 3 | unassigned     | na      | 52   |
| YLR450W | HMG2    | 4 | psiblast       | 1dq8A_  | 100  |
| YLR450W | HMG2    | 5 | psiblast       | 1dq8A_  | 258  |
| YLR450W | HMG2    | 6 | psiblast       | 1dq8A_  | 102  |
| YLR451W | LEU3    | 1 | psiblast       | 1hwtD_  | 106  |
| YLR451W | LEU3    | 2 | msa            | na      | 385  |
| YLR451W | LEU3    | 3 | unassigned     | na      | 395  |
| YLR452C | SST2    | 1 | msa            | na      | 217  |
| YLR452C | SST2    | 2 | unassigned     | na      | 60   |
| YLR452C | SST2    | 3 | pfam           | PF00610 | 79   |
| YLR452C | SST2    | 4 | psiblast       | 1agrE_  | 254  |
| YLR452C | SST2    | 5 | unassigned     | na      | 88   |
| YLR453C | RIF2    | 1 | unassigned     | na      | 395  |
| YLR454W | FMP27   | 1 | unassigned     | na      | 1357 |
| YLR454W | FMP27   | 2 | msa            | na      | 386  |
| YLR454W | FMP27   | 3 | unassigned     | na      | 432  |
| YLR454W | FMP27   | 4 | msa            | na      | 453  |
| YLR455W | YLR455W | 1 | psiblast       | 1khcA_  | 83   |
| YLR455W | YLR455W | 2 | psiblast       | 1khcA_  | 62   |
| YLR455W | YLR455W | 3 | msa            | na      | 97   |
| YLR455W | YLR455W | 4 | unassigned     | na      | 62   |
| YLR456W | YLR456W | 1 | fold_recogniti | 1jnwA   | 156  |
| YLR456W | YLR456W | 2 | fold_recogniti | 1jnwA   | 48   |
| YLR457C | NBP1    | 1 | unassigned     | na      | 161  |
| YLR457C | NBP1    | 2 | msa            | na      | 158  |
| YLR458W | YLR458W | 1 | unassigned     | na      | 126  |
| YLR459W | CDC91   | 1 | msa            | na      | 127  |
| YLR459W | CDC91   | 2 | unassigned     | na      | 61   |
| YLR459W | CDC91   | 3 | msa            | na      | 131  |
| YLR459W | CDC91   | 4 | unassigned     | na      | 75   |
| YLR460C | YLR460C | 1 | psiblast       | 1tehA_  | 232  |
| YLR460C | YLR460C | 2 | psiblast       | 1tehA_  | 144  |
| YLR461W | PAU4    | 1 | pfam           | PF00660 | 120  |
| YLR462W | YLR462W | 1 | msa            | na      | 118  |
| YLR462W | YLR462W | 2 | msa            | na      | 84   |
| YLR463C | YLR463C | 1 | unassigned     | na      | 183  |
| YLR465C | BSC3    | 1 | unassigned     | na      | 102  |
| YLR466W | YRF1-4  | 1 | msa            | na      | 93   |
| YLR466W | YRF1-4  | 2 | unassigned     | na      | 80   |
| YLR466W | YRF1-4  | 3 | msa            | na      | 141  |
| YLR466W | YRF1-4  | 4 | psiblast       | 1fuuA_  | 464  |
| YLR466W | YRF1-4  | 5 | msa            | na      | 229  |
| YLR466W | YRF1-4  | 6 | unassigned     | na      | 375  |
| YML001W | YPT7    | 1 | psiblast       | 1ky2A_  | 208  |
| YML002W | YML002W | 1 | psiblast       | 1ihbA_  | 96   |
| YML002W | YML002W | 2 | psiblast       | 1ihbA_  | 70   |
| YML002W | YML002W | 3 | psiblast       | 1k1aA_  | 116  |

|           |           |    |                |         |     |
|-----------|-----------|----|----------------|---------|-----|
| YML002W   | YML002W   | 4  | psiblast       | 1k1aA_  | 165 |
| YML002W   | YML002W   | 5  | unassigned     | na      | 290 |
| YML003W   | YML003W   | 1  | unassigned     | na      | 290 |
| YML004C   | GLO1      | 1  | psiblast       | 1froA_  | 111 |
| YML004C   | GLO1      | 2  | psiblast       | 1froA_  | 65  |
| YML004C   | GLO1      | 3  | psiblast       | 1jc5A_  | 150 |
| YML005W   | TRM12     | 1  | unassigned     | na      | 226 |
| YML005W   | TRM12     | 2  | psiblast       | 1g6q1_  | 236 |
| YML006C   | GIS4      | 1  | unassigned     | na      | 774 |
| YML007C-A | YML007C-A | 1  | unassigned     | na      | 36  |
| YML007W   | YAP1      | 1  | psiblast       | 1gd2E_  | 187 |
| YML007W   | YAP1      | 2  | unassigned     | na      | 138 |
| YML007W   | YAP1      | 3  | msa            | na      | 325 |
| YML008C   | ERG6      | 1  | psiblast       | 1kp9A_  | 142 |
| YML008C   | ERG6      | 2  | psiblast       | 1kp9A_  | 241 |
| YML009C   | MRPL39    | 1  | unassigned     | na      | 70  |
| YML009C-A | YML009C-A | 1  | unassigned     | na      | 108 |
| YML009W-B | YML009W-B | 1  | unassigned     | na      | 158 |
| YML010W   | SPT5      | 1  | msa            | na      | 232 |
| YML010W   | SPT5      | 2  | pfam           | PF03439 | 82  |
| YML010W   | SPT5      | 3  | pfam           | PF03439 | 67  |
| YML010W   | SPT5      | 4  | pfam           | PF00467 | 59  |
| YML010W   | SPT5      | 5  | unassigned     | na      | 91  |
| YML010W   | SPT5      | 6  | pfam           | PF00467 | 39  |
| YML010W   | SPT5      | 7  | pfam           | PF00467 | 47  |
| YML010W   | SPT5      | 8  | unassigned     | na      | 177 |
| YML010W   | SPT5      | 9  | pfam           | PF00467 | 48  |
| YML010W   | SPT5      | 10 | unassigned     | na      | 66  |
| YML010W   | SPT5      | 11 | psiblast       | 1deqA_  | 155 |
| YML011C   | YML011C   | 1  | unassigned     | na      | 177 |
| YML012C-A | YML012C-A | 1  | unassigned     | na      | 125 |
| YML012W   | ERV25     | 1  | pfam           | PF01105 | 211 |
| YML013W   | SEL1      | 1  | msa            | na      | 95  |
| YML013W   | SEL1      | 2  | unassigned     | na      | 87  |
| YML013W   | SEL1      | 3  | msa            | na      | 169 |
| YML013W   | SEL1      | 4  | unassigned     | na      | 75  |
| YML013W   | SEL1      | 5  | psiblast       | 1h8cA_  | 92  |
| YML013W   | SEL1      | 6  | unassigned     | na      | 66  |
| YML014W   | TRM9      | 1  | psiblast       | 1kp9A_  | 113 |
| YML014W   | TRM9      | 2  | psiblast       | 1kp9A_  | 166 |
| YML015C   | TAF11     | 1  | unassigned     | na      | 113 |
| YML015C   | TAF11     | 2  | psiblast       | 1bh8B_  | 125 |
| YML015C   | TAF11     | 3  | unassigned     | na      | 108 |
| YML016C   | PPZ1      | 1  | fold_recogniti | 1m2vB   | 354 |
| YML016C   | PPZ1      | 2  | psiblast       | 1it6A_  | 338 |
| YML017W   | PSP2      | 1  | unassigned     | na      | 135 |
| YML017W   | PSP2      | 2  | fold_recogniti | 1ldvA   | 130 |
| YML017W   | PSP2      | 3  | fold_recogniti | 1l8mA   | 92  |



|           |           |   |                |         |     |
|-----------|-----------|---|----------------|---------|-----|
| YML017W   | PSP2      | 4 | fold_recogniti | 1l8mA   | 73  |
| YML017W   | PSP2      | 5 | fold_recogniti | 1l8mA   | 78  |
| YML017W   | PSP2      | 6 | fold_recogniti | 1l8mA   | 70  |
| YML018C   | YML018C   | 1 | msa            | na      | 87  |
| YML018C   | YML018C   | 2 | msa            | na      | 306 |
| YML019W   | OST6      | 1 | msa            | na      | 74  |
| YML019W   | OST6      | 2 | msa            | na      | 258 |
| YML020W   | YML020W   | 1 | fold_recogniti | 1ldvA   | 275 |
| YML020W   | YML020W   | 2 | unassigned     | na      | 76  |
| YML020W   | YML020W   | 3 | msa            | na      | 213 |
| YML020W   | YML020W   | 4 | unassigned     | na      | 100 |
| YML021C   | UNG1      | 1 | unassigned     | na      | 86  |
| YML021C   | UNG1      | 2 | psiblast       | 1akz__  | 273 |
| YML022W   | APT1      | 1 | psiblast       | 1g2pA_  | 187 |
| YML023C   | YML023C   | 1 | unassigned     | na      | 556 |
| YML024W   | RPS17A    | 1 | pfam           | PF00833 | 136 |
| YML025C   | YML6      | 1 | psiblast       | 1dmgA_  | 286 |
| YML027W   | YOX1      | 1 | msa            | na      | 134 |
| YML027W   | YOX1      | 2 | psiblast       | 1b8iA_  | 112 |
| YML027W   | YOX1      | 3 | msa            | na      | 139 |
| YML028W   | TSA1      | 1 | psiblast       | 1qmvA_  | 196 |
| YML029W   | USA1      | 1 | unassigned     | na      | 838 |
| YML030W   | YML030W   | 1 | unassigned     | na      | 159 |
| YML031C-A | YML031C-A | 1 | unassigned     | na      | 111 |
| YML031W   | NDC1      | 1 | fold_recogniti | 1ej6B   | 655 |
| YML032C   | RAD52     | 1 | msa            | na      | 145 |
| YML032C   | RAD52     | 2 | fold_recogniti | 1k83A   | 359 |
| YML034C-A | YML034C-A | 1 | unassigned     | na      | 132 |
| YML034W   | SRC1      | 1 | msa            | na      | 149 |
| YML034W   | SRC1      | 2 | fold_recogniti | 1iu4A   | 287 |
| YML034W   | SRC1      | 3 | unassigned     | na      | 242 |
| YML034W   | SRC1      | 4 | msa            | na      | 156 |
| YML035C   | AMD1      | 1 | msa            | na      | 240 |
| YML035C   | AMD1      | 2 | unassigned     | na      | 53  |
| YML035C   | AMD1      | 3 | pfam           | PF00962 | 269 |
| YML035C   | AMD1      | 4 | psiblast       | 1m7mA_  | 248 |
| YML036W   | YML036W   | 1 | unassigned     | na      | 189 |
| YML037C   | YML037C   | 1 | unassigned     | na      | 340 |
| YML038C   | YMD8      | 1 | pfam           | PF00892 | 157 |
| YML038C   | YMD8      | 2 | unassigned     | na      | 119 |
| YML038C   | YMD8      | 3 | msa            | na      | 111 |
| YML038C   | YMD8      | 4 | unassigned     | na      | 55  |
| YML041C   | VPS71     | 1 | unassigned     | na      | 182 |
| YML041C   | VPS71     | 2 | msa            | na      | 98  |
| YML042W   | CAT2      | 1 | unassigned     | na      | 62  |
| YML042W   | CAT2      | 2 | pfam           | PF00755 | 203 |
| YML042W   | CAT2      | 3 | fold_recogniti | 1cb7B   | 133 |
| YML042W   | CAT2      | 4 | fold_recogniti | 1cb7B   | 149 |

|           |           |   |                |         |     |
|-----------|-----------|---|----------------|---------|-----|
| YML042W   | CAT2      | 5 | fold_recogniti | 1cb7B   | 123 |
| YML043C   | RRN11     | 1 | unassigned     | na      | 120 |
| YML043C   | RRN11     | 2 | msa            | na      | 172 |
| YML043C   | RRN11     | 3 | unassigned     | na      | 215 |
| YML046W   | PRP39     | 1 | unassigned     | na      | 64  |
| YML046W   | PRP39     | 2 | psiblast       | 1fchA_  | 145 |
| YML046W   | PRP39     | 3 | psiblast       | 1fchA_  | 61  |
| YML046W   | PRP39     | 4 | psiblast       | 1fchA_  | 83  |
| YML046W   | PRP39     | 5 | psiblast       | 1ihgA_  | 58  |
| YML046W   | PRP39     | 6 | psiblast       | 1ihgA_  | 135 |
| YML046W   | PRP39     | 7 | unassigned     | na      | 83  |
| YML047C   | PRM6      | 1 | msa            | na      | 352 |
| YML047W-A | YML047W-A | 1 | unassigned     | na      | 121 |
| YML048W   | GSF2      | 1 | unassigned     | na      | 403 |
| YML049C   | RSE1      | 1 | msa            | na      | 858 |
| YML049C   | RSE1      | 2 | unassigned     | na      | 74  |
| YML049C   | RSE1      | 3 | pfam           | PF03178 | 429 |
| YML050W   | YML050W   | 1 | unassigned     | na      | 130 |
| YML050W   | YML050W   | 2 | msa            | na      | 181 |
| YML051W   | GAL80     | 1 | psiblast       | 1ofgA_  | 175 |
| YML051W   | GAL80     | 2 | psiblast       | 1ofgA_  | 260 |
| YML052W   | SUR7      | 1 | msa            | na      | 232 |
| YML052W   | SUR7      | 2 | unassigned     | na      | 70  |
| YML053C   | YML053C   | 1 | unassigned     | na      | 212 |
| YML054C   | CYB2      | 1 | unassigned     | na      | 79  |
| YML054C   | CYB2      | 2 | psiblast       | 1fcbA_  | 97  |
| YML054C   | CYB2      | 3 | psiblast       | 1fcbA_  | 415 |
| YML055W   | SPC2      | 1 | unassigned     | na      | 178 |
| YML056C   | IMD4      | 1 | psiblast       | 1b3oA_  | 524 |
| YML057C-A | YML057C-A | 1 | unassigned     | na      | 129 |
| YML057W   | CMP2      | 1 | psiblast       | 1auiA_  | 604 |
| YML058W   | SML1      | 1 | unassigned     | na      | 104 |
| YML058W-A | HUG1      | 1 | unassigned     | na      | 68  |
| YML059C   | YML059C   | 1 | unassigned     | na      | 299 |
| YML059C   | YML059C   | 2 | msa            | na      | 82  |
| YML059C   | YML059C   | 3 | unassigned     | na      | 270 |
| YML059C   | YML059C   | 4 | psiblast       | 1apk__  | 420 |
| YML059C   | YML059C   | 5 | psiblast       | 2gapA_  | 92  |
| YML059C   | YML059C   | 6 | msa            | na      | 120 |
| YML059C   | YML059C   | 7 | unassigned     | na      | 66  |
| YML059C   | YML059C   | 8 | msa            | na      | 330 |
| YML060W   | OGG1      | 1 | psiblast       | 1ko9A_  | 74  |
| YML060W   | OGG1      | 2 | psiblast       | 1ko9A_  | 111 |
| YML060W   | OGG1      | 3 | psiblast       | 1ko9A_  | 191 |
| YML061C   | PIF1      | 1 | unassigned     | na      | 133 |
| YML061C   | PIF1      | 2 | psiblast       | 1fts__  | 103 |
| YML061C   | PIF1      | 3 | psiblast       | 1uaaA_  | 279 |
| YML061C   | PIF1      | 4 | psiblast       | 1uaaA_  | 119 |

|         |       |    |                |         |     |
|---------|-------|----|----------------|---------|-----|
| YML061C | PIF1  | 5  | msa            | na      | 144 |
| YML061C | PIF1  | 6  | unassigned     | na      | 81  |
| YML062C | MFT1  | 1  | msa            | na      | 72  |
| YML062C | MFT1  | 2  | fold_recogniti | 1I8mA   | 130 |
| YML062C | MFT1  | 3  | fold_recogniti | 1I8mA   | 79  |
| YML062C | MFT1  | 4  | fold_recogniti | 1I8mA   | 111 |
| YML063W | RPS1B | 1  | pfam           | PF01015 | 255 |
| YML064C | TEM1  | 1  | psiblast       | 1g17A_  | 245 |
| YML065W | ORC1  | 1  | pfam           | PF01426 | 198 |
| YML065W | ORC1  | 2  | msa            | na      | 127 |
| YML065W | ORC1  | 3  | unassigned     | na      | 84  |
| YML065W | ORC1  | 4  | psiblast       | 1e32A_  | 217 |
| YML065W | ORC1  | 5  | psiblast       | 1e32A_  | 132 |
| YML065W | ORC1  | 6  | unassigned     | na      | 156 |
| YML066C | SMA2  | 1  | unassigned     | na      | 369 |
| YML067C | ERV41 | 1  | unassigned     | na      | 99  |
| YML067C | ERV41 | 2  | msa            | na      | 253 |
| YML068W | ITT1  | 1  | msa            | na      | 77  |
| YML068W | ITT1  | 2  | unassigned     | na      | 76  |
| YML068W | ITT1  | 3  | msa            | na      | 98  |
| YML068W | ITT1  | 4  | pfam           | PF01485 | 87  |
| YML068W | ITT1  | 5  | pfam           | PF01485 | 126 |
| YML069W | POB3  | 1  | unassigned     | na      | 208 |
| YML069W | POB3  | 2  | pfam           | PF03531 | 267 |
| YML069W | POB3  | 3  | unassigned     | na      | 77  |
| YML070W | DAK1  | 1  | fold_recogniti | 1itwA   | 352 |
| YML070W | DAK1  | 2  | fold_recogniti | 1itwA   | 232 |
| YML071C | COG8  | 1  | psiblast       | 1i84S_  | 306 |
| YML071C | COG8  | 2  | fold_recogniti | 1k83A   | 301 |
| YML072C | TCB3  | 1  | unassigned     | na      | 360 |
| YML072C | TCB3  | 2  | msa            | na      | 121 |
| YML072C | TCB3  | 3  | psiblast       | 1rsy__  | 152 |
| YML072C | TCB3  | 4  | msa            | na      | 136 |
| YML072C | TCB3  | 5  | psiblast       | 1dsyA_  | 146 |
| YML072C | TCB3  | 6  | unassigned     | na      | 64  |
| YML072C | TCB3  | 7  | psiblast       | 1dqvA_  | 137 |
| YML072C | TCB3  | 8  | psiblast       | 1dqvA_  | 170 |
| YML072C | TCB3  | 9  | unassigned     | na      | 116 |
| YML072C | TCB3  | 10 | msa            | na      | 143 |
| YML073C | RPL6A | 1  | msa            | na      | 66  |
| YML073C | RPL6A | 2  | pfam           | PF01159 | 110 |
| YML074C | FPR3  | 1  | fold_recogniti | 1I8mA   | 89  |
| YML074C | FPR3  | 2  | fold_recogniti | 1I8mA   | 79  |
| YML074C | FPR3  | 3  | fold_recogniti | 1I8mA   | 70  |
| YML074C | FPR3  | 4  | fold_recogniti | 1I8mA   | 69  |
| YML074C | FPR3  | 5  | psiblast       | 1yat__  | 104 |
| YML075C | HMG1  | 1  | msa            | na      | 524 |
| YML075C | HMG1  | 2  | unassigned     | na      | 53  |

|           |           |   |                |         |      |
|-----------|-----------|---|----------------|---------|------|
| YML075C   | HMG1      | 3 | psiblast       | 1dq8A_  | 112  |
| YML075C   | HMG1      | 4 | psiblast       | 1dq8A_  | 263  |
| YML075C   | HMG1      | 5 | psiblast       | 1dq8A_  | 102  |
| YML076C   | WAR1      | 1 | unassigned     | na      | 944  |
| YML077W   | BET5      | 1 | unassigned     | na      | 159  |
| YML078W   | CPR3      | 1 | psiblast       | 1ak4A_  | 182  |
| YML079W   | YML079W   | 1 | msa            | na      | 132  |
| YML079W   | YML079W   | 2 | msa            | na      | 69   |
| YML080W   | DUS1      | 1 | psiblast       | 1gox__  | 365  |
| YML080W   | DUS1      | 2 | unassigned     | na      | 58   |
| YML081C-A | ATP18     | 1 | unassigned     | na      | 59   |
| YML081W   | YML081W   | 1 | psiblast       | 2adr__  | 155  |
| YML081W   | YML081W   | 2 | psiblast       | 2drpA_  | 62   |
| YML081W   | YML081W   | 3 | msa            | na      | 58   |
| YML081W   | YML081W   | 4 | msa            | na      | 129  |
| YML081W   | YML081W   | 5 | unassigned     | na      | 64   |
| YML081W   | YML081W   | 6 | msa            | na      | 783  |
| YML082W   | YML082W   | 1 | msa            | na      | 184  |
| YML082W   | YML082W   | 2 | psiblast       | 1qgnA_  | 342  |
| YML082W   | YML082W   | 3 | psiblast       | 1qgnA_  | 123  |
| YML083C   | YML083C   | 1 | unassigned     | na      | 418  |
| YML084W   | YML084W   | 1 | unassigned     | na      | 102  |
| YML085C   | TUB1      | 1 | psiblast       | 1ffxA_  | 447  |
| YML086C   | ALO1      | 1 | psiblast       | 1i19A_  | 284  |
| YML086C   | ALO1      | 2 | psiblast       | 1i19A_  | 242  |
| YML087C   | YML087C   | 1 | psiblast       | 1vhbA_  | 61   |
| YML087C   | YML087C   | 2 | psiblast       | 1cnf__  | 106  |
| YML087C   | YML087C   | 3 | psiblast       | 1cnf__  | 145  |
| YML088W   | UFO1      | 1 | psiblast       | 1fs2A_  | 102  |
| YML088W   | UFO1      | 2 | psiblast       | 1erjA_  | 247  |
| YML088W   | UFO1      | 3 | unassigned     | na      | 319  |
| YML089C   | YML089C   | 1 | unassigned     | na      | 122  |
| YML090W   | YML090W   | 1 | unassigned     | na      | 128  |
| YML091C   | RPM2      | 1 | unassigned     | na      | 1202 |
| YML092C   | PRE8      | 1 | psiblast       | 1fntP_  | 250  |
| YML093W   | UTP14     | 1 | psiblast       | 1i84S_  | 320  |
| YML093W   | UTP14     | 2 | msa            | na      | 496  |
| YML093W   | UTP14     | 3 | unassigned     | na      | 83   |
| YML094C-A | YML094C-A | 1 | unassigned     | na      | 133  |
| YML094W   | GIM5      | 1 | psiblast       | 1fxkC_  | 83   |
| YML094W   | GIM5      | 2 | psiblast       | 1fxkC_  | 80   |
| YML095C   | RAD10     | 1 | unassigned     | na      | 73   |
| YML095C   | RAD10     | 2 | pfam           | PF03834 | 137  |
| YML096W   | YML096W   | 1 | psiblast       | 1ct9A_  | 203  |
| YML096W   | YML096W   | 2 | psiblast       | 1ct9A_  | 322  |
| YML097C   | VPS9      | 1 | fold_recogniti | 1n1bA   | 451  |
| YML098W   | TAF13     | 1 | psiblast       | 1bh8A_  | 54   |
| YML098W   | TAF13     | 2 | pfam           | PF02269 | 113  |

|           |           |   |                |         |      |
|-----------|-----------|---|----------------|---------|------|
| YML099C   | ARG81     | 1 | psiblast       | 1pyiA_  | 69   |
| YML099C   | ARG81     | 2 | unassigned     | na      | 811  |
| YML099W-A | YML099W-A | 1 | unassigned     | na      | 109  |
| YML100W   | TSL1      | 1 | msa            | na      | 251  |
| YML100W   | TSL1      | 2 | pfam           | PF00982 | 558  |
| YML100W   | TSL1      | 3 | pfam           | PF02358 | 289  |
| YML101C   | CUE4      | 1 | unassigned     | na      | 53   |
| YML101C   | CUE4      | 2 | pfam           | PF02845 | 64   |
| YML101C-A | YML101C-A | 1 | unassigned     | na      | 105  |
| YML102W   | CAC2      | 1 | pfam           | PF00400 | 48   |
| YML102W   | CAC2      | 2 | psiblast       | 1erjA_  | 420  |
| YML103C   | NUP188    | 1 | unassigned     | na      | 1655 |
| YML104C   | MDM1      | 1 | unassigned     | na      | 80   |
| YML104C   | MDM1      | 2 | pfam           | PF02194 | 214  |
| YML104C   | MDM1      | 3 | unassigned     | na      | 94   |
| YML104C   | MDM1      | 4 | fold_recogniti | 1agrE   | 219  |
| YML104C   | MDM1      | 5 | unassigned     | na      | 89   |
| YML104C   | MDM1      | 6 | psiblast       | 1h6hA_  | 224  |
| YML104C   | MDM1      | 7 | msa            | na      | 207  |
| YML105C   | SEC65     | 1 | unassigned     | na      | 81   |
| YML105C   | SEC65     | 2 | psiblast       | 1jidA_  | 119  |
| YML105C   | SEC65     | 3 | unassigned     | na      | 73   |
| YML106W   | URA5      | 1 | psiblast       | 1lh0A_  | 226  |
| YML107C   | YML107C   | 1 | unassigned     | na      | 386  |
| YML108W   | YML108W   | 1 | unassigned     | na      | 105  |
| YML109W   | ZDS2      | 1 | unassigned     | na      | 131  |
| YML109W   | ZDS2      | 2 | fold_recogniti | 1jv2B   | 385  |
| YML109W   | ZDS2      | 3 | fold_recogniti | 1jv2B   | 84   |
| YML109W   | ZDS2      | 4 | fold_recogniti | 1m2vB   | 219  |
| YML109W   | ZDS2      | 5 | unassigned     | na      | 123  |
| YML110C   | COQ5      | 1 | psiblast       | 1kpiA_  | 307  |
| YML111W   | BUL2      | 1 | unassigned     | na      | 97   |
| YML111W   | BUL2      | 2 | msa            | na      | 459  |
| YML111W   | BUL2      | 3 | unassigned     | na      | 85   |
| YML111W   | BUL2      | 4 | msa            | na      | 279  |
| YML112W   | CTK3      | 1 | unassigned     | na      | 296  |
| YML113W   | DAT1      | 1 | unassigned     | na      | 248  |
| YML114C   | TAF8      | 1 | msa            | na      | 264  |
| YML114C   | TAF8      | 2 | unassigned     | na      | 246  |
| YML115C   | VAN1      | 1 | unassigned     | na      | 121  |
| YML115C   | VAN1      | 2 | pfam           | PF03452 | 414  |
| YML116W   | ATR1      | 1 | psiblast       | 1lviA_  | 490  |
| YML116W   | ATR1      | 2 | unassigned     | na      | 52   |
| YML116W-A | YML116W-A | 1 | unassigned     | na      | 100  |
| YML117W   | NAB6      | 1 | fold_recogniti | 1ruxA   | 204  |
| YML117W   | NAB6      | 2 | fold_recogniti | 1ruxA   | 169  |
| YML117W   | NAB6      | 3 | fold_recogniti | 1ruxA   | 179  |
| YML117W   | NAB6      | 4 | fold_recogniti | 1k28D   | 84   |

|         |         |   |                |         |     |
|---------|---------|---|----------------|---------|-----|
| YML117W | NAB6    | 5 | psiblast       | 1fxIA_  | 90  |
| YML117W | NAB6    | 6 | psiblast       | 1fxIA_  | 120 |
| YML117W | NAB6    | 7 | unassigned     | na      | 63  |
| YML117W | NAB6    | 8 | msa            | na      | 168 |
| YML117W | NAB6    | 9 | unassigned     | na      | 57  |
| YML118W | NGL3    | 1 | psiblast       | 1hd7A_  | 407 |
| YML118W | NGL3    | 2 | unassigned     | na      | 98  |
| YML119W | YML119W | 1 | unassigned     | na      | 357 |
| YML120C | NDI1    | 1 | psiblast       | 1lvl__  | 352 |
| YML120C | NDI1    | 2 | psiblast       | 1lvl__  | 161 |
| YML121W | GTR1    | 1 | psiblast       | 1g17A_  | 234 |
| YML121W | GTR1    | 2 | msa            | na      | 76  |
| YML122C | YML122C | 1 | unassigned     | na      | 126 |
| YML123C | PHO84   | 1 | psiblast       | 1ja5A_  | 496 |
| YML123C | PHO84   | 2 | psiblast       | 1ja5A_  | 91  |
| YML124C | TUB3    | 1 | psiblast       | 1ffxA_  | 445 |
| YML125C | YML125C | 1 | psiblast       | 1vhbA_  | 61  |
| YML125C | YML125C | 2 | psiblast       | 1ib0A_  | 106 |
| YML125C | YML125C | 3 | psiblast       | 1ib0A_  | 145 |
| YML126C | ERG13   | 1 | psiblast       | 1cgkA_  | 374 |
| YML126C | ERG13   | 2 | pfam           | PF01154 | 117 |
| YML127W | RSC9    | 1 | unassigned     | na      | 54  |
| YML127W | RSC9    | 2 | msa            | na      | 446 |
| YML127W | RSC9    | 3 | unassigned     | na      | 81  |
| YML128C | MSC1    | 1 | msa            | na      | 395 |
| YML128C | MSC1    | 2 | unassigned     | na      | 118 |
| YML129C | COX14   | 1 | unassigned     | na      | 70  |
| YML130C | ERO1    | 1 | unassigned     | na      | 173 |
| YML130C | ERO1    | 2 | fold_recogniti | 1n1bA   | 390 |
| YML131W | YML131W | 1 | psiblast       | 1qorA_  | 183 |
| YML131W | YML131W | 2 | psiblast       | 1qorA_  | 182 |
| YML133C | YML133C | 1 | msa            | na      | 209 |
| YML133C | YML133C | 2 | msa            | na      | 93  |
| YML133C | YML133C | 3 | psiblast       | 1fuuA_  | 487 |
| YML133C | YML133C | 4 | unassigned     | na      | 88  |
| YML133C | YML133C | 5 | psiblast       | 1ezgA_  | 125 |
| YML133C | YML133C | 6 | unassigned     | na      | 372 |
| YMR001C | CDC5    | 1 | psiblast       | 1ctpE_  | 301 |
| YMR001C | CDC5    | 2 | psiblast       | 1ctpE_  | 81  |
| YMR001C | CDC5    | 3 | psiblast       | 1ahr__  | 73  |
| YMR001C | CDC5    | 4 | psiblast       | 1ahr__  | 64  |
| YMR001C | CDC5    | 5 | fold_recogniti | 1mbyA   | 83  |
| YMR001C | CDC5    | 6 | unassigned     | na      | 103 |
| YMR002W | YMR002W | 1 | unassigned     | na      | 156 |
| YMR003W | YMR003W | 1 | psiblast       | 1jeqA_  | 106 |
| YMR003W | YMR003W | 2 | unassigned     | na      | 92  |
| YMR004W | MVP1    | 1 | unassigned     | na      | 84  |
| YMR004W | MVP1    | 2 | psiblast       | 1h6hA_  | 159 |

|           |           |   |                |         |     |
|-----------|-----------|---|----------------|---------|-----|
| YMR004W   | MVP1      | 3 | psiblast       | 1dg3A_  | 145 |
| YMR004W   | MVP1      | 4 | psiblast       | 1dg3A_  | 123 |
| YMR005W   | TAF4      | 1 | unassigned     | na      | 96  |
| YMR005W   | TAF4      | 2 | psiblast       | 1i84S_  | 222 |
| YMR005W   | TAF4      | 3 | unassigned     | na      | 70  |
| YMR006C   | PLB2      | 1 | psiblast       | 1cjyA_  | 465 |
| YMR006C   | PLB2      | 2 | unassigned     | na      | 241 |
| YMR007W   | YMR007W   | 1 | unassigned     | na      | 126 |
| YMR008C   | PLB1      | 1 | psiblast       | 1cjyA_  | 364 |
| YMR008C   | PLB1      | 2 | fold_recogniti | 1cjyA   | 228 |
| YMR008C   | PLB1      | 3 | unassigned     | na      | 72  |
| YMR009W   | YMR009W   | 1 | unassigned     | na      | 70  |
| YMR009W   | YMR009W   | 2 | fold_recogniti | 1l3jA   | 109 |
| YMR010W   | YMR010W   | 1 | msa            | na      | 167 |
| YMR010W   | YMR010W   | 2 | unassigned     | na      | 76  |
| YMR010W   | YMR010W   | 3 | msa            | na      | 162 |
| YMR011W   | HXT2      | 1 | psiblast       | 1ja5A_  | 463 |
| YMR011W   | HXT2      | 2 | psiblast       | 1ja5A_  | 78  |
| YMR012W   | CLU1      | 1 | msa            | na      | 716 |
| YMR012W   | CLU1      | 2 | unassigned     | na      | 86  |
| YMR012W   | CLU1      | 3 | psiblast       | 1fchA_  | 189 |
| YMR012W   | CLU1      | 4 | psiblast       | 1fchA_  | 85  |
| YMR012W   | CLU1      | 5 | psiblast       | 1fchA_  | 78  |
| YMR012W   | CLU1      | 6 | psiblast       | 1fchA_  | 123 |
| YMR013C   | SEC59     | 1 | fold_recogniti | 1k04A   | 59  |
| YMR013C   | SEC59     | 2 | fold_recogniti | 1n1bA   | 125 |
| YMR013C   | SEC59     | 3 | fold_recogniti | 1n1bA   | 199 |
| YMR013C   | SEC59     | 4 | pfam           | PF01879 | 136 |
| YMR013W-A | YMR013W-A | 1 | unassigned     | na      | 26  |
| YMR014W   | BUD22     | 1 | unassigned     | na      | 110 |
| YMR014W   | BUD22     | 2 | msa            | na      | 126 |
| YMR014W   | BUD22     | 3 | psiblast       | 1i84S_  | 283 |
| YMR015C   | ERG5      | 1 | unassigned     | na      | 80  |
| YMR015C   | ERG5      | 2 | psiblast       | 1jo9A_  | 143 |
| YMR015C   | ERG5      | 3 | psiblast       | 1jo9A_  | 166 |
| YMR015C   | ERG5      | 4 | psiblast       | 1jo9A_  | 149 |
| YMR016C   | SOK2      | 1 | fold_recogniti | 1deqA   | 125 |
| YMR016C   | SOK2      | 2 | fold_recogniti | 1ei3A   | 289 |
| YMR016C   | SOK2      | 3 | psiblast       | 1bm8__  | 95  |
| YMR016C   | SOK2      | 4 | fold_recogniti | 1ldvA   | 276 |
| YMR017W   | SPO20     | 1 | unassigned     | na      | 139 |
| YMR017W   | SPO20     | 2 | psiblast       | 1jthA_  | 111 |
| YMR017W   | SPO20     | 3 | psiblast       | 1sfcD_  | 147 |
| YMR018W   | YMR018W   | 1 | msa            | na      | 78  |
| YMR018W   | YMR018W   | 2 | unassigned     | na      | 75  |
| YMR018W   | YMR018W   | 3 | psiblast       | 1fchA_  | 148 |
| YMR018W   | YMR018W   | 4 | psiblast       | 1fchA_  | 73  |
| YMR018W   | YMR018W   | 5 | psiblast       | 1fchA_  | 60  |

|           |           |   |            |        |     |
|-----------|-----------|---|------------|--------|-----|
| YMR018W   | YMR018W   | 6 | psiblast   | 1fchA_ | 80  |
| YMR019W   | STB4      | 1 | unassigned | na     | 67  |
| YMR019W   | STB4      | 2 | psiblast   | 1pyiA_ | 155 |
| YMR019W   | STB4      | 3 | unassigned | na     | 727 |
| YMR020W   | FMS1      | 1 | psiblast   | 1b37A_ | 353 |
| YMR020W   | FMS1      | 2 | psiblast   | 1b37A_ | 155 |
| YMR021C   | MAC1      | 1 | psiblast   | 1co4A_ | 61  |
| YMR021C   | MAC1      | 2 | unassigned | na     | 356 |
| YMR022W   | QRI8      | 1 | psiblast   | 2ucz__ | 165 |
| YMR023C   | MSS1      | 1 | msa        | na     | 87  |
| YMR023C   | MSS1      | 2 | msa        | na     | 177 |
| YMR023C   | MSS1      | 3 | psiblast   | 1egaA_ | 262 |
| YMR024W   | MRPL3     | 1 | msa        | na     | 106 |
| YMR024W   | MRPL3     | 2 | psiblast   | 1jfzA_ | 193 |
| YMR024W   | MRPL3     | 3 | psiblast   | 1di2A_ | 91  |
| YMR025W   | CSI1      | 1 | unassigned | na     | 295 |
| YMR026C   | PEX12     | 1 | unassigned | na     | 65  |
| YMR026C   | PEX12     | 2 | psiblast   | 1fbvA_ | 106 |
| YMR026C   | PEX12     | 3 | psiblast   | 1fbvA_ | 162 |
| YMR026C   | PEX12     | 4 | psiblast   | 1fbvA_ | 66  |
| YMR027W   | YMR027W   | 1 | msa        | na     | 130 |
| YMR027W   | YMR027W   | 2 | unassigned | na     | 69  |
| YMR027W   | YMR027W   | 3 | msa        | na     | 271 |
| YMR028W   | TAP42     | 1 | msa        | na     | 90  |
| YMR028W   | TAP42     | 2 | unassigned | na     | 276 |
| YMR029C   | FAR8      | 1 | msa        | na     | 120 |
| YMR029C   | FAR8      | 2 | unassigned | na     | 403 |
| YMR030W   | RSF1      | 1 | unassigned | na     | 376 |
| YMR031C   | YMR031C   | 1 | msa        | na     | 381 |
| YMR031C   | YMR031C   | 2 | unassigned | na     | 64  |
| YMR031C   | YMR031C   | 3 | psiblast   | 1i84S_ | 398 |
| YMR031W-A | YMR031W-A | 1 | unassigned | na     | 108 |
| YMR032W   | HOF1      | 1 | psiblast   | 1i84S_ | 241 |
| YMR032W   | HOF1      | 2 | msa        | na     | 257 |
| YMR032W   | HOF1      | 3 | msa        | na     | 96  |
| YMR032W   | HOF1      | 4 | psiblast   | 1ark__ | 75  |
| YMR033W   | ARP9      | 1 | psiblast   | 1yagA_ | 242 |
| YMR033W   | ARP9      | 2 | psiblast   | 1yagA_ | 225 |
| YMR034C   | YMR034C   | 1 | msa        | na     | 352 |
| YMR034C   | YMR034C   | 2 | unassigned | na     | 82  |
| YMR035W   | IMP2      | 1 | psiblast   | 1kn9A_ | 177 |
| YMR036C   | MIH1      | 1 | unassigned | na     | 66  |
| YMR036C   | MIH1      | 2 | msa        | na     | 110 |
| YMR036C   | MIH1      | 3 | psiblast   | 1cwrA_ | 280 |
| YMR036C   | MIH1      | 4 | unassigned | na     | 98  |
| YMR037C   | MSN2      | 1 | unassigned | na     | 162 |
| YMR037C   | MSN2      | 2 | msa        | na     | 189 |
| YMR037C   | MSN2      | 3 | psiblast   | 1tf6A_ | 192 |



|           |           |   |                |         |     |
|-----------|-----------|---|----------------|---------|-----|
| YMR037C   | MSN2      | 4 | psiblast       | 1meyG_  | 87  |
| YMR037C   | MSN2      | 5 | psiblast       | 1jk1A_  | 74  |
| YMR038C   | LYS7      | 1 | psiblast       | 1jk9B_  | 104 |
| YMR038C   | LYS7      | 2 | psiblast       | 1jk9B_  | 145 |
| YMR039C   | SUB1      | 1 | psiblast       | 1pcfA_  | 116 |
| YMR039C   | SUB1      | 2 | msa            | na      | 176 |
| YMR040W   | YET2      | 1 | unassigned     | na      | 160 |
| YMR041C   | YMR041C   | 1 | psiblast       | 1exbA_  | 271 |
| YMR041C   | YMR041C   | 2 | psiblast       | 1exbA_  | 64  |
| YMR042W   | ARG80     | 1 | psiblast       | 1mnmA_  | 177 |
| YMR043W   | MCM1      | 1 | psiblast       | 1mnmA_  | 100 |
| YMR043W   | MCM1      | 2 | msa            | na      | 186 |
| YMR044W   | IOC4      | 1 | pfam           | PF00855 | 103 |
| YMR044W   | IOC4      | 2 | msa            | na      | 315 |
| YMR044W   | IOC4      | 3 | unassigned     | na      | 57  |
| YMR046W-A | YMR046W-A | 1 | unassigned     | na      | 42  |
| YMR047C   | NUP116    | 1 | msa            | na      | 510 |
| YMR047C   | NUP116    | 2 | unassigned     | na      | 113 |
| YMR047C   | NUP116    | 3 | msa            | na      | 383 |
| YMR047C   | NUP116    | 4 | unassigned     | na      | 107 |
| YMR048W   | CSM3      | 1 | msa            | na      | 174 |
| YMR048W   | CSM3      | 2 | unassigned     | na      | 143 |
| YMR049C   | ERB1      | 1 | msa            | na      | 308 |
| YMR049C   | ERB1      | 2 | unassigned     | na      | 60  |
| YMR049C   | ERB1      | 3 | psiblast       | 1gg2B_  | 383 |
| YMR049C   | ERB1      | 4 | psiblast       | 1erjA_  | 56  |
| YMR052C-A | YMR052C-A | 1 | unassigned     | na      | 121 |
| YMR052W   | FAR3      | 1 | unassigned     | na      | 204 |
| YMR053C   | STB2      | 1 | unassigned     | na      | 600 |
| YMR053C   | STB2      | 2 | msa            | na      | 250 |
| YMR054W   | STV1      | 1 | unassigned     | na      | 80  |
| YMR054W   | STV1      | 2 | psiblast       | 1i84S_  | 328 |
| YMR054W   | STV1      | 3 | msa            | na      | 482 |
| YMR055C   | BUB2      | 1 | psiblast       | 1fkmA_  | 181 |
| YMR055C   | BUB2      | 2 | psiblast       | 1fkmA_  | 53  |
| YMR055C   | BUB2      | 3 | unassigned     | na      | 72  |
| YMR056C   | AAC1      | 1 | fold_recogniti | 1is2A   | 309 |
| YMR057C   | YMR057C   | 1 | unassigned     | na      | 123 |
| YMR058W   | FET3      | 1 | psiblast       | 1kyaA_  | 352 |
| YMR058W   | FET3      | 2 | psiblast       | 1kyaA_  | 193 |
| YMR058W   | FET3      | 3 | unassigned     | na      | 91  |
| YMR059W   | SEN15     | 1 | unassigned     | na      | 148 |
| YMR060C   | TOM37     | 1 | unassigned     | na      | 327 |
| YMR061W   | RNA14     | 1 | psiblast       | 1hz4A_  | 126 |
| YMR061W   | RNA14     | 2 | psiblast       | 1hz4A_  | 100 |
| YMR061W   | RNA14     | 3 | psiblast       | 1fchA_  | 137 |
| YMR061W   | RNA14     | 4 | psiblast       | 1fchA_  | 100 |
| YMR061W   | RNA14     | 5 | psiblast       | 1fchA_  | 128 |

|           |           |   |                |        |     |
|-----------|-----------|---|----------------|--------|-----|
| YMR061W   | RNA14     | 6 | unassigned     | na     | 86  |
| YMR062C   | ECM40     | 1 | fold_recogniti | 1b65A  | 358 |
| YMR062C   | ECM40     | 2 | unassigned     | na     | 83  |
| YMR063W   | RIM9      | 1 | msa            | na     | 116 |
| YMR063W   | RIM9      | 2 | unassigned     | na     | 123 |
| YMR064W   | AEP1      | 1 | unassigned     | na     | 518 |
| YMR065W   | KAR5      | 1 | unassigned     | na     | 108 |
| YMR065W   | KAR5      | 2 | fold_recogniti | 3btaA  | 291 |
| YMR065W   | KAR5      | 3 | fold_recogniti | 3btaA  | 105 |
| YMR066W   | SOV1      | 1 | unassigned     | na     | 898 |
| YMR067C   | UBX4      | 1 | unassigned     | na     | 126 |
| YMR067C   | UBX4      | 2 | msa            | na     | 99  |
| YMR067C   | UBX4      | 3 | psiblast       | 1jruA_ | 191 |
| YMR068W   | AVO2      | 1 | psiblast       | 1k1aA_ | 103 |
| YMR068W   | AVO2      | 2 | psiblast       | 1k1aA_ | 126 |
| YMR068W   | AVO2      | 3 | psiblast       | 1sw6A_ | 67  |
| YMR068W   | AVO2      | 4 | msa            | na     | 130 |
| YMR069W   | NAT4      | 1 | unassigned     | na     | 128 |
| YMR069W   | NAT4      | 2 | psiblast       | 1bo4A_ | 157 |
| YMR070W   | MOT3      | 1 | unassigned     | na     | 164 |
| YMR070W   | MOT3      | 2 | msa            | na     | 118 |
| YMR070W   | MOT3      | 3 | psiblast       | 1lu6A_ | 85  |
| YMR070W   | MOT3      | 4 | psiblast       | 1lu6A_ | 123 |
| YMR071C   | TVP18     | 1 | unassigned     | na     | 167 |
| YMR072W   | ABF2      | 1 | psiblast       | 1hme__ | 113 |
| YMR072W   | ABF2      | 2 | fold_recogniti | 1j46A  | 70  |
| YMR073C   | YMR073C   | 1 | unassigned     | na     | 112 |
| YMR073C   | YMR073C   | 2 | psiblast       | 1b5m__ | 89  |
| YMR074C   | YMR074C   | 1 | psiblast       | 1eijA_ | 145 |
| YMR075C-A | YMR075C-A | 1 | unassigned     | na     | 121 |
| YMR075W   | RCO1      | 1 | msa            | na     | 215 |
| YMR075W   | RCO1      | 2 | psiblast       | 1fp0A_ | 96  |
| YMR075W   | RCO1      | 3 | unassigned     | na     | 111 |
| YMR075W   | RCO1      | 4 | psiblast       | 1f62A_ | 62  |
| YMR075W   | RCO1      | 5 | unassigned     | na     | 200 |
| YMR076C   | PDS5      | 1 | msa            | na     | 698 |
| YMR076C   | PDS5      | 2 | unassigned     | na     | 142 |
| YMR076C   | PDS5      | 3 | msa            | na     | 356 |
| YMR076C   | PDS5      | 4 | unassigned     | na     | 81  |
| YMR077C   | VPS20     | 1 | psiblast       | 1i84S_ | 221 |
| YMR078C   | CTF18     | 1 | psiblast       | 1e32A_ | 122 |
| YMR078C   | CTF18     | 2 | psiblast       | 1e32A_ | 197 |
| YMR078C   | CTF18     | 3 | psiblast       | 1e32A_ | 122 |
| YMR078C   | CTF18     | 4 | msa            | na     | 213 |
| YMR078C   | CTF18     | 5 | unassigned     | na     | 87  |
| YMR079W   | SEC14     | 1 | psiblast       | 1aua__ | 243 |
| YMR079W   | SEC14     | 2 | psiblast       | 1aua__ | 61  |
| YMR080C   | NAM7      | 1 | unassigned     | na     | 224 |

|           |           |   |                |        |     |
|-----------|-----------|---|----------------|--------|-----|
| YMR080C   | NAM7      | 2 | msa            | na     | 165 |
| YMR080C   | NAM7      | 3 | psiblast       | 1pjr__ | 249 |
| YMR080C   | NAM7      | 4 | psiblast       | 1pjr__ | 333 |
| YMR081C   | ISF1      | 1 | unassigned     | na     | 338 |
| YMR082C   | YMR082C   | 1 | unassigned     | na     | 118 |
| YMR083W   | ADH3      | 1 | psiblast       | 1e3jA_ | 214 |
| YMR083W   | ADH3      | 2 | psiblast       | 1e3jA_ | 161 |
| YMR084W   | YMR084W   | 1 | psiblast       | 1jxaA_ | 262 |
| YMR085W   | YMR085W   | 1 | psiblast       | 1jxaA_ | 277 |
| YMR085W   | YMR085W   | 2 | psiblast       | 1jxaA_ | 155 |
| YMR086C-A | YMR086C-A | 1 | unassigned     | na     | 112 |
| YMR086W   | YMR086W   | 1 | fold_recogniti | 1l8mA  | 70  |
| YMR086W   | YMR086W   | 2 | fold_recogniti | 1jl5A  | 346 |
| YMR086W   | YMR086W   | 3 | unassigned     | na     | 58  |
| YMR086W   | YMR086W   | 4 | msa            | na     | 277 |
| YMR086W   | YMR086W   | 5 | msa            | na     | 209 |
| YMR087W   | YMR087W   | 1 | unassigned     | na     | 284 |
| YMR088C   | YMR088C   | 1 | psiblast       | 1ja5A_ | 360 |
| YMR088C   | YMR088C   | 2 | psiblast       | 1ja5A_ | 63  |
| YMR088C   | YMR088C   | 3 | msa            | na     | 139 |
| YMR089C   | YTA12     | 1 | unassigned     | na     | 162 |
| YMR089C   | YTA12     | 2 | psiblast       | 1e32A_ | 102 |
| YMR089C   | YTA12     | 3 | psiblast       | 1e32A_ | 80  |
| YMR089C   | YTA12     | 4 | psiblast       | 1e32A_ | 174 |
| YMR089C   | YTA12     | 5 | psiblast       | 1e32A_ | 84  |
| YMR089C   | YTA12     | 6 | msa            | na     | 119 |
| YMR089C   | YTA12     | 7 | msa            | na     | 104 |
| YMR090W   | YMR090W   | 1 | psiblast       | 1bxkB_ | 227 |
| YMR091C   | NPL6      | 1 | msa            | na     | 261 |
| YMR091C   | NPL6      | 2 | unassigned     | na     | 174 |
| YMR092C   | AIP1      | 1 | psiblast       | 1erjA_ | 247 |
| YMR092C   | AIP1      | 2 | fold_recogniti | 1jjuB  | 119 |
| YMR092C   | AIP1      | 3 | psiblast       | 1gxrA_ | 67  |
| YMR092C   | AIP1      | 4 | psiblast       | 1c5kA_ | 75  |
| YMR092C   | AIP1      | 5 | fold_recogniti | 1k8kC  | 107 |
| YMR093W   | UTP15     | 1 | psiblast       | 1gg2B_ | 334 |
| YMR093W   | UTP15     | 2 | msa            | na     | 179 |
| YMR094W   | CTF13     | 1 | msa            | na     | 292 |
| YMR094W   | CTF13     | 2 | unassigned     | na     | 186 |
| YMR095C   | SNO1      | 1 | psiblast       | 1gpmA_ | 224 |
| YMR096W   | SNZ1      | 1 | fold_recogniti | 1pymA  | 194 |
| YMR096W   | SNZ1      | 2 | psiblast       | 2tpsA_ | 103 |
| YMR097C   | MTG1      | 1 | psiblast       | 1egaA_ | 137 |
| YMR097C   | MTG1      | 2 | fold_recogniti | 1dg3A  | 230 |
| YMR098C   | YMR098C   | 1 | unassigned     | na     | 612 |
| YMR099C   | YMR099C   | 1 | psiblast       | 1l7jA_ | 199 |
| YMR099C   | YMR099C   | 2 | unassigned     | na     | 98  |
| YMR100W   | MUB1      | 1 | msa            | na     | 215 |

|         |         |   |                |         |     |
|---------|---------|---|----------------|---------|-----|
| YMR100W | MUB1    | 2 | unassigned     | na      | 251 |
| YMR100W | MUB1    | 3 | pfam           | PF01753 | 154 |
| YMR101C | SRT1    | 1 | psiblast       | 1jp3A_  | 343 |
| YMR102C | YMR102C | 1 | psiblast       | 1k8kC_  | 163 |
| YMR102C | YMR102C | 2 | psiblast       | 1erjA_  | 343 |
| YMR102C | YMR102C | 3 | psiblast       | 1crzA_  | 118 |
| YMR102C | YMR102C | 4 | msa            | na      | 210 |
| YMR103C | YMR103C | 1 | unassigned     | na      | 120 |
| YMR104C | YPK2    | 1 | unassigned     | na      | 151 |
| YMR104C | YPK2    | 2 | psiblast       | 1jnuA_  | 129 |
| YMR104C | YPK2    | 3 | psiblast       | 1atpE_  | 278 |
| YMR104C | YPK2    | 4 | psiblast       | 1atpE_  | 119 |
| YMR105C | PGM2    | 1 | psiblast       | 1c47A_  | 191 |
| YMR105C | PGM2    | 2 | psiblast       | 1c47A_  | 149 |
| YMR105C | PGM2    | 3 | psiblast       | 1c47A_  | 102 |
| YMR105C | PGM2    | 4 | psiblast       | 1c47A_  | 127 |
| YMR106C | YKU80   | 1 | psiblast       | 1jeqA_  | 297 |
| YMR106C | YKU80   | 2 | psiblast       | 1jeqA_  | 181 |
| YMR106C | YKU80   | 3 | psiblast       | 1jeqA_  | 151 |
| YMR107W | SPG4    | 1 | unassigned     | na      | 115 |
| YMR108W | ILV2    | 1 | psiblast       | 1jscA_  | 274 |
| YMR108W | ILV2    | 2 | psiblast       | 1jscA_  | 199 |
| YMR108W | ILV2    | 3 | psiblast       | 1jscA_  | 214 |
| YMR109W | MYO5    | 1 | psiblast       | 1lkxA_  | 642 |
| YMR109W | MYO5    | 2 | psiblast       | 1lkxA_  | 72  |
| YMR109W | MYO5    | 3 | psiblast       | 1wdcA_  | 54  |
| YMR109W | MYO5    | 4 | psiblast       | 2tmaA_  | 74  |
| YMR109W | MYO5    | 5 | psiblast       | 2tmaA_  | 63  |
| YMR109W | MYO5    | 6 | psiblast       | 2tmaA_  | 52  |
| YMR109W | MYO5    | 7 | fold_recogniti | 1ldvA   | 113 |
| YMR109W | MYO5    | 8 | psiblast       | 1awj__  | 97  |
| YMR109W | MYO5    | 9 | unassigned     | na      | 52  |
| YMR110C | YMR110C | 1 | psiblast       | 1bi9A_  | 330 |
| YMR110C | YMR110C | 2 | psiblast       | 1bi9A_  | 202 |
| YMR111C | YMR111C | 1 | unassigned     | na      | 201 |
| YMR111C | YMR111C | 2 | msa            | na      | 261 |
| YMR112C | MED11   | 1 | unassigned     | na      | 131 |
| YMR113W | FOL3    | 1 | psiblast       | 1fgs__  | 272 |
| YMR113W | FOL3    | 2 | psiblast       | 1fgs__  | 155 |
| YMR114C | YMR114C | 1 | pfam           | PF02586 | 254 |
| YMR114C | YMR114C | 2 | unassigned     | na      | 114 |
| YMR115W | FMP24   | 1 | unassigned     | na      | 103 |
| YMR115W | FMP24   | 2 | fold_recogniti | 1hz4A   | 107 |
| YMR115W | FMP24   | 3 | fold_recogniti | 1hz4A   | 141 |
| YMR115W | FMP24   | 4 | fold_recogniti | 1hz4A   | 150 |
| YMR116C | ASC1    | 1 | psiblast       | 1erjA_  | 319 |
| YMR117C | SPC24   | 1 | unassigned     | na      | 213 |
| YMR118C | YMR118C | 1 | pfam           | PF01127 | 196 |

|           |           |   |                |         |     |
|-----------|-----------|---|----------------|---------|-----|
| YMR119W   | ASI1      | 1 | unassigned     | na      | 296 |
| YMR119W   | ASI1      | 2 | psiblast       | 1i84S_  | 269 |
| YMR119W   | ASI1      | 3 | psiblast       | 1fbvA_  | 59  |
| YMR119W-A | YMR119W-A | 1 | unassigned     | na      | 124 |
| YMR120C   | ADE17     | 1 | psiblast       | 1g8mA_  | 197 |
| YMR120C   | ADE17     | 2 | psiblast       | 1g8mA_  | 181 |
| YMR120C   | ADE17     | 3 | psiblast       | 1g8mA_  | 214 |
| YMR121C   | RPL15B    | 1 | psiblast       | 1k5yL_  | 204 |
| YMR122C   | YMR122C   | 1 | unassigned     | na      | 124 |
| YMR122W-A | YMR122W-A | 1 | unassigned     | na      | 84  |
| YMR123W   | PKR1      | 1 | unassigned     | na      | 122 |
| YMR124W   | YMR124W   | 1 | unassigned     | na      | 171 |
| YMR124W   | YMR124W   | 2 | fold_recogniti | 1ldvA   | 110 |
| YMR124W   | YMR124W   | 3 | fold_recogniti | 1ivoA   | 174 |
| YMR124W   | YMR124W   | 4 | fold_recogniti | 1ivoA   | 400 |
| YMR124W   | YMR124W   | 5 | unassigned     | na      | 88  |
| YMR125W   | STO1      | 1 | psiblast       | 1h6kA_  | 293 |
| YMR125W   | STO1      | 2 | psiblast       | 1h6kA_  | 169 |
| YMR125W   | STO1      | 3 | psiblast       | 1h6kA_  | 93  |
| YMR125W   | STO1      | 4 | psiblast       | 1h6kA_  | 306 |
| YMR126C   | DLT1      | 1 | msa            | na      | 117 |
| YMR126C   | DLT1      | 2 | unassigned     | na      | 225 |
| YMR127C   | SAS2      | 1 | psiblast       | 1fy7A_  | 123 |
| YMR127C   | SAS2      | 2 | psiblast       | 1fy7A_  | 113 |
| YMR127C   | SAS2      | 3 | psiblast       | 1fy7A_  | 102 |
| YMR128W   | ECM16     | 1 | psiblast       | 1i84S_  | 291 |
| YMR128W   | ECM16     | 2 | unassigned     | na      | 117 |
| YMR128W   | ECM16     | 3 | psiblast       | 1hv8A_  | 176 |
| YMR128W   | ECM16     | 4 | psiblast       | 1hv8A_  | 111 |
| YMR128W   | ECM16     | 5 | fold_recogniti | 1fuuA   | 158 |
| YMR128W   | ECM16     | 6 | msa            | na      | 414 |
| YMR129W   | POM152    | 1 | unassigned     | na      | 396 |
| YMR129W   | POM152    | 2 | msa            | na      | 247 |
| YMR129W   | POM152    | 3 | unassigned     | na      | 694 |
| YMR130W   | YMR130W   | 1 | psiblast       | 1jud__  | 220 |
| YMR130W   | YMR130W   | 2 | psiblast       | 1jud__  | 82  |
| YMR131C   | RRB1      | 1 | msa            | na      | 181 |
| YMR131C   | RRB1      | 2 | psiblast       | 1gg2B_  | 330 |
| YMR132C   | JLP2      | 1 | msa            | na      | 145 |
| YMR132C   | JLP2      | 2 | unassigned     | na      | 63  |
| YMR133W   | REC114    | 1 | pfam           | PF03525 | 351 |
| YMR133W   | REC114    | 2 | unassigned     | na      | 77  |
| YMR134W   | YMR134W   | 1 | unassigned     | na      | 237 |
| YMR135C   | GID8      | 1 | msa            | na      | 350 |
| YMR135C   | GID8      | 2 | unassigned     | na      | 105 |
| YMR135W-A | YMR135W-A | 1 | unassigned     | na      | 177 |
| YMR136W   | GAT2      | 1 | unassigned     | na      | 86  |
| YMR136W   | GAT2      | 2 | msa            | na      | 360 |

|           |           |   |                |          |     |
|-----------|-----------|---|----------------|----------|-----|
| YMR136W   | GAT2      | 3 | psiblast       | 1gnf__   | 114 |
| YMR137C   | PSO2      | 1 | unassigned     | na       | 183 |
| YMR137C   | PSO2      | 2 | psiblast       | 1ddkA_   | 113 |
| YMR137C   | PSO2      | 3 | psiblast       | 1ddkA_   | 110 |
| YMR137C   | PSO2      | 4 | unassigned     | na       | 60  |
| YMR137C   | PSO2      | 5 | msa            | na       | 195 |
| YMR138W   | CIN4      | 1 | psiblast       | 1kshA_   | 191 |
| YMR139W   | RIM11     | 1 | psiblast       | 1i09A_   | 116 |
| YMR139W   | RIM11     | 2 | psiblast       | 1i09A_   | 254 |
| YMR140W   | SIP5      | 1 | unassigned     | na       | 315 |
| YMR140W   | SIP5      | 2 | pfam           | PF00462  | 174 |
| YMR141C   | YMR141C   | 1 | unassigned     | na       | 102 |
| YMR142C   | RPL13B    | 1 | pfam           | PF01294  | 199 |
| YMR144W   | YMR144W   | 1 | unassigned     | na       | 342 |
| YMR145C   | NDE1      | 1 | psiblast       | 1fcdA_   | 102 |
| YMR145C   | NDE1      | 2 | psiblast       | 1ebdA_   | 161 |
| YMR145C   | NDE1      | 3 | psiblast       | 1ebdA_   | 203 |
| YMR145C   | NDE1      | 4 | psiblast       | 1ebdA_   | 94  |
| YMR146C   | TIF34     | 1 | psiblast       | 1gg2B_   | 347 |
| YMR147W   | YMR147W   | 1 | unassigned     | na       | 223 |
| YMR148W   | YMR148W   | 1 | unassigned     | na       | 148 |
| YMR149W   | SWP1      | 1 | unassigned     | na       | 286 |
| YMR150C   | IMP1      | 1 | psiblast       | 1b12A_   | 104 |
| YMR150C   | IMP1      | 2 | fold_recogniti | 1kn9A    | 86  |
| YMR151W   | YIM2      | 1 | unassigned     | na       | 145 |
| YMR152W   | YIM1      | 1 | psiblast       | 1hdyA_   | 131 |
| YMR152W   | YIM1      | 2 | psiblast       | 1hdyA_   | 84  |
| YMR152W   | YIM1      | 3 | psiblast       | 1hdyA_   | 150 |
| YMR153C-A | YMR153C-A | 1 | unassigned     | na       | 111 |
| YMR153W   | NUP53     | 1 | fold_recogniti | 1k83A    | 379 |
| YMR153W   | NUP53     | 2 | unassigned     | na       | 96  |
| YMR154C   | RIM13     | 1 | psiblast       | 1kfuL_   | 219 |
| YMR154C   | RIM13     | 2 | psiblast       | 1kfuL_   | 105 |
| YMR154C   | RIM13     | 3 | psiblast       | 1kfuL_   | 131 |
| YMR154C   | RIM13     | 4 | psiblast       | 1kfuL_   | 70  |
| YMR154C   | RIM13     | 5 | psiblast       | 1df0_A:2 | 70  |
| YMR154C   | RIM13     | 6 | unassigned     | na       | 132 |
| YMR155W   | YMR155W   | 1 | psiblast       | 1lviA_   | 271 |
| YMR155W   | YMR155W   | 2 | unassigned     | na       | 64  |
| YMR155W   | YMR155W   | 3 | msa            | na       | 212 |
| YMR156C   | TPP1      | 1 | msa            | na       | 238 |
| YMR157C   | FMP39     | 1 | unassigned     | na       | 255 |
| YMR158C-A | YMR158C-A | 1 | unassigned     | na       | 45  |
| YMR158W   | MRPS8     | 1 | psiblast       | 1seiA_   | 90  |
| YMR158W   | MRPS8     | 2 | psiblast       | 1seiA_   | 65  |
| YMR158W-B | YMR158W-B | 1 | unassigned     | na       | 106 |
| YMR159C   | ATG16     | 1 | psiblast       | 1i84S_   | 150 |
| YMR160W   | YMR160W   | 1 | unassigned     | na       | 816 |

|           |           |   |                |         |     |
|-----------|-----------|---|----------------|---------|-----|
| YMR161W   | HLJ1      | 1 | psiblast       | 1xbl__  | 148 |
| YMR161W   | HLJ1      | 2 | psiblast       | 1exkA_  | 76  |
| YMR162C   | DNF3      | 1 | unassigned     | na      | 85  |
| YMR162C   | DNF3      | 2 | msa            | na      | 145 |
| YMR162C   | DNF3      | 3 | unassigned     | na      | 59  |
| YMR162C   | DNF3      | 4 | msa            | na      | 103 |
| YMR162C   | DNF3      | 5 | psiblast       | 1eulA_  | 205 |
| YMR162C   | DNF3      | 6 | psiblast       | 1eulA_  | 420 |
| YMR162C   | DNF3      | 7 | psiblast       | 1eulA_  | 243 |
| YMR162C   | DNF3      | 8 | psiblast       | 1eulA_  | 256 |
| YMR162C   | DNF3      | 9 | msa            | na      | 140 |
| YMR163C   | YMR163C   | 1 | unassigned     | na      | 160 |
| YMR163C   | YMR163C   | 2 | fold_recogniti | 1qoyA   | 287 |
| YMR163C   | YMR163C   | 3 | unassigned     | na      | 258 |
| YMR164C   | MSS11     | 1 | unassigned     | na      | 237 |
| YMR164C   | MSS11     | 2 | msa            | na      | 212 |
| YMR164C   | MSS11     | 3 | msa            | na      | 250 |
| YMR164C   | MSS11     | 4 | unassigned     | na      | 59  |
| YMR165C   | SMP2      | 1 | unassigned     | na      | 156 |
| YMR165C   | SMP2      | 2 | msa            | na      | 498 |
| YMR165C   | SMP2      | 3 | unassigned     | na      | 208 |
| YMR166C   | YMR166C   | 1 | fold_recogniti | 1is2A   | 368 |
| YMR167W   | MLH1      | 1 | psiblast       | 1bknA_  | 212 |
| YMR167W   | MLH1      | 2 | psiblast       | 1bknA_  | 182 |
| YMR167W   | MLH1      | 3 | msa            | na      | 375 |
| YMR168C   | CEP3      | 1 | psiblast       | 2hapC_  | 81  |
| YMR168C   | CEP3      | 2 | unassigned     | na      | 527 |
| YMR169C   | ALD3      | 1 | psiblast       | 1bi9A_  | 302 |
| YMR169C   | ALD3      | 2 | psiblast       | 1bi9A_  | 204 |
| YMR170C   | ALD2      | 1 | psiblast       | 1bi9A_  | 302 |
| YMR170C   | ALD2      | 2 | psiblast       | 1bi9A_  | 204 |
| YMR171C   | YMR171C   | 1 | unassigned     | na      | 168 |
| YMR171C   | YMR171C   | 2 | pfam           | PF00622 | 256 |
| YMR171C   | YMR171C   | 3 | unassigned     | na      | 126 |
| YMR172C-A | YMR172C-A | 1 | unassigned     | na      | 127 |
| YMR172W   | HOT1      | 1 | unassigned     | na      | 154 |
| YMR172W   | HOT1      | 2 | fold_recogniti | 1k83A   | 434 |
| YMR172W   | HOT1      | 3 | unassigned     | na      | 131 |
| YMR173W   | DDR48     | 1 | psiblast       | 1kapP_  | 203 |
| YMR173W   | DDR48     | 2 | psiblast       | 1kapP_  | 227 |
| YMR173W-A | YMR173W-A | 1 | fold_recogniti | 1ldvA   | 66  |
| YMR173W-A | YMR173W-A | 2 | fold_recogniti | 1m2vB   | 328 |
| YMR174C   | PAI3      | 1 | psiblast       | 1dp5B_  | 68  |
| YMR175W   | SIP18     | 1 | unassigned     | na      | 79  |
| YMR176W   | ECM5      | 1 | unassigned     | na      | 114 |
| YMR176W   | ECM5      | 2 | psiblast       | 1kqqA_  | 97  |
| YMR176W   | ECM5      | 3 | psiblast       | 1kqqA_  | 106 |
| YMR176W   | ECM5      | 4 | unassigned     | na      | 77  |

|         |         |    |                |         |     |
|---------|---------|----|----------------|---------|-----|
| YMR176W | ECM5    | 5  | msa            | na      | 345 |
| YMR176W | ECM5    | 6  | unassigned     | na      | 85  |
| YMR176W | ECM5    | 7  | psiblast       | 1dg3A_  | 62  |
| YMR176W | ECM5    | 8  | psiblast       | 1i84S_  | 333 |
| YMR176W | ECM5    | 9  | psiblast       | 1fp0A_  | 80  |
| YMR176W | ECM5    | 10 | unassigned     | na      | 112 |
| YMR177W | MMT1    | 1  | unassigned     | na      | 145 |
| YMR177W | MMT1    | 2  | pfam           | PF01545 | 365 |
| YMR178W | YMR178W | 1  | psiblast       | 1g8IA_  | 139 |
| YMR178W | YMR178W | 2  | msa            | na      | 135 |
| YMR179W | SPT21   | 1  | unassigned     | na      | 758 |
| YMR180C | CTL1    | 1  | unassigned     | na      | 57  |
| YMR180C | CTL1    | 2  | psiblast       | 1d8hA_  | 263 |
| YMR181C | YMR181C | 1  | unassigned     | na      | 154 |
| YMR182C | RGM1    | 1  | psiblast       | 1lu6A_  | 71  |
| YMR182C | RGM1    | 2  | psiblast       | 1lu6A_  | 66  |
| YMR182C | RGM1    | 3  | msa            | na      | 74  |
| YMR183C | SSO2    | 1  | psiblast       | 1fioA_  | 240 |
| YMR183C | SSO2    | 2  | psiblast       | 1fioA_  | 55  |
| YMR184W | YMR184W | 1  | unassigned     | na      | 198 |
| YMR185W | YMR185W | 1  | unassigned     | na      | 152 |
| YMR185W | YMR185W | 2  | fold_recogniti | 1qgkA   | 216 |
| YMR185W | YMR185W | 3  | fold_recogniti | 1qgkA   | 195 |
| YMR185W | YMR185W | 4  | fold_recogniti | 1qgkA   | 96  |
| YMR185W | YMR185W | 5  | fold_recogniti | 1qgkA   | 118 |
| YMR185W | YMR185W | 6  | fold_recogniti | 1qgkA   | 204 |
| YMR186W | HSC82   | 1  | psiblast       | 1a4h__  | 220 |
| YMR186W | HSC82   | 2  | pfam           | PF00183 | 485 |
| YMR187C | YMR187C | 1  | unassigned     | na      | 431 |
| YMR188C | MRPS17  | 1  | psiblast       | 1qd7I_  | 112 |
| YMR188C | MRPS17  | 2  | unassigned     | na      | 125 |
| YMR189W | GCV2    | 1  | unassigned     | na      | 111 |
| YMR189W | GCV2    | 2  | psiblast       | 1jf9A_  | 149 |
| YMR189W | GCV2    | 3  | psiblast       | 1jf9A_  | 279 |
| YMR189W | GCV2    | 4  | psiblast       | 1qgnA_  | 324 |
| YMR189W | GCV2    | 5  | psiblast       | 1qgnA_  | 171 |
| YMR190C | SGS1    | 1  | unassigned     | na      | 134 |
| YMR190C | SGS1    | 2  | msa            | na      | 520 |
| YMR190C | SGS1    | 3  | psiblast       | 1hv8A_  | 213 |
| YMR190C | SGS1    | 4  | psiblast       | 1hv8A_  | 150 |
| YMR190C | SGS1    | 5  | psiblast       | 1d2mA_  | 139 |
| YMR190C | SGS1    | 6  | unassigned     | na      | 113 |
| YMR190C | SGS1    | 7  | psiblast       | 1d8bA_  | 104 |
| YMR190C | SGS1    | 8  | unassigned     | na      | 74  |
| YMR191W | SPG5    | 1  | msa            | na      | 255 |
| YMR191W | SPG5    | 2  | unassigned     | na      | 203 |
| YMR192W | APP2    | 1  | fold_recogniti | 1llwA   | 247 |
| YMR192W | APP2    | 2  | psiblast       | 1fkmA_  | 110 |



|           |           |    |                |         |     |
|-----------|-----------|----|----------------|---------|-----|
| YMR192W   | APP2      | 3  | psiblast       | 1i84S_  | 363 |
| YMR193C-A | YMR193C-A | 1  | unassigned     | na      | 128 |
| YMR193W   | MRPL24    | 1  | pfam           | PF00830 | 169 |
| YMR193W   | MRPL24    | 2  | unassigned     | na      | 89  |
| YMR194C-A | YMR194C-A | 1  | unassigned     | na      | 74  |
| YMR194W   | RPL36A    | 1  | pfam           | PF01158 | 100 |
| YMR195W   | ICY1      | 1  | unassigned     | na      | 127 |
| YMR196W   | YMR196W   | 1  | unassigned     | na      | 751 |
| YMR196W   | YMR196W   | 2  | msa            | na      | 254 |
| YMR196W   | YMR196W   | 3  | unassigned     | na      | 83  |
| YMR197C   | VTI1      | 1  | psiblast       | 1i84S_  | 121 |
| YMR197C   | VTI1      | 2  | psiblast       | 1gl2C_  | 96  |
| YMR198W   | CIK1      | 1  | psiblast       | 1i84S_  | 362 |
| YMR198W   | CIK1      | 2  | psiblast       | 2tmaA_  | 44  |
| YMR198W   | CIK1      | 3  | psiblast       | 2tmaA_  | 117 |
| YMR198W   | CIK1      | 4  | unassigned     | na      | 71  |
| YMR199W   | CLN1      | 1  | psiblast       | 1vin__  | 238 |
| YMR199W   | CLN1      | 2  | psiblast       | 1vin__  | 148 |
| YMR199W   | CLN1      | 3  | unassigned     | na      | 160 |
| YMR200W   | ROT1      | 1  | unassigned     | na      | 256 |
| YMR201C   | RAD14     | 1  | pfam           | PF01286 | 186 |
| YMR201C   | RAD14     | 2  | psiblast       | 1xpa__  | 185 |
| YMR202W   | ERG2      | 1  | msa            | na      | 222 |
| YMR203W   | TOM40     | 1  | msa            | na      | 158 |
| YMR203W   | TOM40     | 2  | unassigned     | na      | 69  |
| YMR203W   | TOM40     | 3  | msa            | na      | 160 |
| YMR204C   | YMR204C   | 1  | unassigned     | na      | 420 |
| YMR205C   | PFK2      | 1  | unassigned     | na      | 185 |
| YMR205C   | PFK2      | 2  | psiblast       | 6pfkA_  | 235 |
| YMR205C   | PFK2      | 3  | psiblast       | 6pfkA_  | 128 |
| YMR205C   | PFK2      | 4  | psiblast       | 1kzhA_  | 279 |
| YMR205C   | PFK2      | 5  | fold_recogniti | 1pfkA   | 132 |
| YMR206W   | YMR206W   | 1  | unassigned     | na      | 313 |
| YMR207C   | HFA1      | 1  | psiblast       | 1bncA_  | 100 |
| YMR207C   | HFA1      | 2  | psiblast       | 1bncA_  | 166 |
| YMR207C   | HFA1      | 3  | psiblast       | 1bncA_  | 262 |
| YMR207C   | HFA1      | 4  | unassigned     | na      | 79  |
| YMR207C   | HFA1      | 5  | psiblast       | 1dczA_  | 104 |
| YMR207C   | HFA1      | 6  | unassigned     | na      | 159 |
| YMR207C   | HFA1      | 7  | msa            | na      | 177 |
| YMR207C   | HFA1      | 8  | msa            | na      | 180 |
| YMR207C   | HFA1      | 9  | msa            | na      | 196 |
| YMR207C   | HFA1      | 10 | msa            | na      | 623 |
| YMR207C   | HFA1      | 11 | unassigned     | na      | 77  |
| YMR208W   | ERG12     | 1  | psiblast       | 1kvkA_  | 239 |
| YMR208W   | ERG12     | 2  | psiblast       | 1kvkA_  | 204 |
| YMR209C   | YMR209C   | 1  | unassigned     | na      | 201 |
| YMR209C   | YMR209C   | 2  | msa            | na      | 256 |

|         |         |    |                |         |     |
|---------|---------|----|----------------|---------|-----|
| YMR210W | YMR210W | 1  | unassigned     | na      | 119 |
| YMR210W | YMR210W | 2  | psiblast       | 1a8s__  | 330 |
| YMR211W | DML1    | 1  | msa            | na      | 79  |
| YMR211W | DML1    | 2  | psiblast       | 1ffxB_  | 396 |
| YMR212C | EFR3    | 1  | msa            | na      | 416 |
| YMR212C | EFR3    | 2  | unassigned     | na      | 366 |
| YMR213W | CEF1    | 1  | psiblast       | 1mseC_  | 61  |
| YMR213W | CEF1    | 2  | psiblast       | 1mseC_  | 56  |
| YMR213W | CEF1    | 3  | fold_recogniti | 1cii_   | 473 |
| YMR214W | SCJ1    | 1  | psiblast       | 1xbl__  | 168 |
| YMR214W | SCJ1    | 2  | psiblast       | 1exkA_  | 78  |
| YMR214W | SCJ1    | 3  | psiblast       | 1c3gA_  | 62  |
| YMR214W | SCJ1    | 4  | psiblast       | 1c3gA_  | 96  |
| YMR215W | GAS3    | 1  | fold_recogniti | 1g01A   | 291 |
| YMR215W | GAS3    | 2  | unassigned     | na      | 77  |
| YMR215W | GAS3    | 3  | msa            | na      | 156 |
| YMR216C | SKY1    | 1  | unassigned     | na      | 129 |
| YMR216C | SKY1    | 2  | psiblast       | 1ckiA_  | 243 |
| YMR216C | SKY1    | 3  | unassigned     | na      | 52  |
| YMR216C | SKY1    | 4  | psiblast       | 1howA_  | 61  |
| YMR216C | SKY1    | 5  | psiblast       | 1howA_  | 75  |
| YMR216C | SKY1    | 6  | psiblast       | 1howA_  | 182 |
| YMR217W | GUA1    | 1  | psiblast       | 1gpmA_  | 203 |
| YMR217W | GUA1    | 2  | psiblast       | 1gpmA_  | 200 |
| YMR217W | GUA1    | 3  | psiblast       | 1gpmA_  | 122 |
| YMR218C | TRS130  | 1  | msa            | na      | 515 |
| YMR218C | TRS130  | 2  | unassigned     | na      | 587 |
| YMR219W | ESC1    | 1  | unassigned     | na      | 72  |
| YMR219W | ESC1    | 2  | psiblast       | 1c1gA_  | 83  |
| YMR219W | ESC1    | 3  | psiblast       | 1i84S_  | 343 |
| YMR219W | ESC1    | 4  | unassigned     | na      | 73  |
| YMR219W | ESC1    | 5  | psiblast       | 2tmaA_  | 58  |
| YMR219W | ESC1    | 6  | psiblast       | 2tmaA_  | 82  |
| YMR219W | ESC1    | 7  | psiblast       | 2tmaA_  | 62  |
| YMR219W | ESC1    | 8  | psiblast       | 2tmaA_  | 83  |
| YMR219W | ESC1    | 9  | msa            | na      | 341 |
| YMR219W | ESC1    | 10 | unassigned     | na      | 76  |
| YMR219W | ESC1    | 11 | fold_recogniti | 1l8mA   | 69  |
| YMR219W | ESC1    | 12 | fold_recogniti | 1m2vB   | 316 |
| YMR220W | ERG8    | 1  | psiblast       | 1kvkA_  | 209 |
| YMR220W | ERG8    | 2  | psiblast       | 1kvkA_  | 242 |
| YMR221C | FMP42   | 1  | msa            | na      | 211 |
| YMR221C | FMP42   | 2  | unassigned     | na      | 71  |
| YMR221C | FMP42   | 3  | msa            | na      | 222 |
| YMR222C | FSH2    | 1  | psiblast       | 1fj2A_  | 223 |
| YMR223W | UBP8    | 1  | pfam           | PF02148 | 130 |
| YMR223W | UBP8    | 2  | pfam           | PF00442 | 49  |
| YMR223W | UBP8    | 3  | msa            | na      | 219 |

|         |         |    |            |         |     |
|---------|---------|----|------------|---------|-----|
| YMR223W | UBP8    | 4  | pfam       | PF00443 | 73  |
| YMR224C | MRE11   | 1  | psiblast   | 1ii7A_  | 294 |
| YMR224C | MRE11   | 2  | psiblast   | 1ii7A_  | 128 |
| YMR224C | MRE11   | 3  | unassigned | na      | 270 |
| YMR225C | MRPL44  | 1  | unassigned | na      | 98  |
| YMR226C | YMR226C | 1  | psiblast   | 1i01A_  | 267 |
| YMR227C | TAF7    | 1  | psiblast   | 1i84S_  | 152 |
| YMR227C | TAF7    | 2  | psiblast   | 1i84S_  | 284 |
| YMR227C | TAF7    | 3  | psiblast   | 1jchA_  | 154 |
| YMR228W | MTF1    | 1  | psiblast   | 1i4wA_  | 254 |
| YMR228W | MTF1    | 2  | psiblast   | 1i4wA_  | 87  |
| YMR229C | RRP5    | 1  | unassigned | na      | 69  |
| YMR229C | RRP5    | 2  | msa        | na      | 162 |
| YMR229C | RRP5    | 3  | unassigned | na      | 64  |
| YMR229C | RRP5    | 4  | msa        | na      | 159 |
| YMR229C | RRP5    | 5  | unassigned | na      | 96  |
| YMR229C | RRP5    | 6  | psiblast   | 1sro__  | 139 |
| YMR229C | RRP5    | 7  | psiblast   | 1e3pA_  | 119 |
| YMR229C | RRP5    | 8  | psiblast   | 1e3pA_  | 135 |
| YMR229C | RRP5    | 9  | psiblast   | 1e3pA_  | 102 |
| YMR229C | RRP5    | 10 | psiblast   | 1e3pA_  | 324 |
| YMR229C | RRP5    | 11 | psiblast   | 1fchA_  | 159 |
| YMR229C | RRP5    | 12 | psiblast   | 1fchA_  | 68  |
| YMR229C | RRP5    | 13 | psiblast   | 1fchA_  | 133 |
| YMR230W | RPS10B  | 1  | pfam       | PF03501 | 105 |
| YMR231W | PEP5    | 1  | unassigned | na      | 377 |
| YMR231W | PEP5    | 2  | pfam       | PF00637 | 258 |
| YMR231W | PEP5    | 3  | unassigned | na      | 230 |
| YMR231W | PEP5    | 4  | psiblast   | 1jm7B_  | 164 |
| YMR232W | FUS2    | 1  | unassigned | na      | 66  |
| YMR232W | FUS2    | 2  | psiblast   | 1lb1A_  | 255 |
| YMR232W | FUS2    | 3  | psiblast   | 1lb1A_  | 156 |
| YMR232W | FUS2    | 4  | unassigned | na      | 200 |
| YMR233W | YMR233W | 1  | msa        | na      | 84  |
| YMR233W | YMR233W | 2  | pfam       | PF02201 | 142 |
| YMR234W | RNH1    | 1  | psiblast   | 1qhka_  | 47  |
| YMR234W | RNH1    | 2  | psiblast   | 1rt3A_  | 128 |
| YMR234W | RNH1    | 3  | psiblast   | 1rt3A_  | 173 |
| YMR235C | RNA1    | 1  | psiblast   | 1k5dC_  | 195 |
| YMR235C | RNA1    | 2  | psiblast   | 1k5dC_  | 145 |
| YMR235C | RNA1    | 3  | psiblast   | 1k14A_  | 67  |
| YMR236W | TAF9    | 1  | psiblast   | 1tafA_  | 157 |
| YMR237W | YMR237W | 1  | unassigned | na      | 415 |
| YMR237W | YMR237W | 2  | msa        | na      | 309 |
| YMR238W | DFG5    | 1  | pfam       | PF03663 | 458 |
| YMR239C | RNT1    | 1  | msa        | na      | 112 |
| YMR239C | RNT1    | 2  | unassigned | na      | 68  |
| YMR239C | RNT1    | 3  | psiblast   | 1jfzA_  | 179 |

|           |           |   |            |         |      |
|-----------|-----------|---|------------|---------|------|
| YMR239C   | RNT1      | 4 | psiblast   | 1ekzA_  | 112  |
| YMR240C   | CUS1      | 1 | unassigned | na      | 279  |
| YMR240C   | CUS1      | 2 | msa        | na      | 157  |
| YMR241W   | YHM2      | 1 | pfam       | PF00153 | 107  |
| YMR241W   | YHM2      | 2 | pfam       | PF00153 | 99   |
| YMR241W   | YHM2      | 3 | pfam       | PF00153 | 108  |
| YMR242C   | RPL20A    | 1 | pfam       | PF01775 | 180  |
| YMR243C   | ZRC1      | 1 | pfam       | PF01545 | 442  |
| YMR244C-A | YMR244C-A | 1 | unassigned | na      | 104  |
| YMR244W   | YMR244W   | 1 | pfam       | PF03856 | 355  |
| YMR245W   | YMR245W   | 1 | unassigned | na      | 206  |
| YMR246W   | FAA4      | 1 | psiblast   | 1ba3__  | 360  |
| YMR246W   | FAA4      | 2 | psiblast   | 1ba3__  | 334  |
| YMR247C   | YMR247C   | 1 | msa        | na      | 350  |
| YMR247C   | YMR247C   | 2 | unassigned | na      | 1099 |
| YMR247C   | YMR247C   | 3 | psiblast   | 1e4uA_  | 113  |
| YMR250W   | GAD1      | 1 | psiblast   | 1js3A_  | 85   |
| YMR250W   | GAD1      | 2 | psiblast   | 1js3A_  | 500  |
| YMR251W   | YMR251W   | 1 | psiblast   | 1eemA_  | 190  |
| YMR251W   | YMR251W   | 2 | unassigned | na      | 176  |
| YMR251W-A | HOR7      | 1 | unassigned | na      | 59   |
| YMR252C   | YMR252C   | 1 | unassigned | na      | 134  |
| YMR253C   | YMR253C   | 1 | unassigned | na      | 53   |
| YMR253C   | YMR253C   | 2 | pfam       | PF00892 | 176  |
| YMR253C   | YMR253C   | 3 | pfam       | PF00892 | 185  |
| YMR254C   | YMR254C   | 1 | unassigned | na      | 102  |
| YMR255W   | GFD1      | 1 | unassigned | na      | 188  |
| YMR256C   | COX7      | 1 | unassigned | na      | 60   |
| YMR257C   | PET111    | 1 | unassigned | na      | 511  |
| YMR257C   | PET111    | 2 | msa        | na      | 289  |
| YMR258C   | YMR258C   | 1 | unassigned | na      | 553  |
| YMR259C   | YMR259C   | 1 | msa        | na      | 162  |
| YMR259C   | YMR259C   | 2 | unassigned | na      | 142  |
| YMR259C   | YMR259C   | 3 | msa        | na      | 585  |
| YMR259C   | YMR259C   | 4 | msa        | na      | 142  |
| YMR259C   | YMR259C   | 5 | unassigned | na      | 389  |
| YMR260C   | TIF11     | 1 | psiblast   | 1d7qA_  | 153  |
| YMR261C   | TPS3      | 1 | msa        | na      | 250  |
| YMR261C   | TPS3      | 2 | pfam       | PF00982 | 525  |
| YMR261C   | TPS3      | 3 | pfam       | PF02358 | 279  |
| YMR262W   | YMR262W   | 1 | pfam       | PF01026 | 313  |
| YMR263W   | SAP30     | 1 | unassigned | na      | 201  |
| YMR264W   | CUE1      | 1 | pfam       | PF02845 | 109  |
| YMR264W   | CUE1      | 2 | unassigned | na      | 94   |
| YMR265C   | YMR265C   | 1 | msa        | na      | 258  |
| YMR265C   | YMR265C   | 2 | unassigned | na      | 203  |
| YMR266W   | RSN1      | 1 | msa        | na      | 206  |
| YMR266W   | RSN1      | 2 | unassigned | na      | 87   |

|         |         |              |         |     |
|---------|---------|--------------|---------|-----|
| YMR266W | RSN1    | 3 pfam       | PF02714 | 484 |
| YMR266W | RSN1    | 4 unassigned | na      | 176 |
| YMR267W | PPA2    | 1 psiblast   | 1e6aA_  | 310 |
| YMR268C | PRP24   | 1 psiblast   | 1cvjA_  | 112 |
| YMR268C | PRP24   | 2 psiblast   | 1l3kA_  | 89  |
| YMR268C | PRP24   | 3 psiblast   | 1l3kA_  | 99  |
| YMR268C | PRP24   | 4 psiblast   | 1qm9A_  | 144 |
| YMR269W | YMR269W | 1 unassigned | na      | 142 |
| YMR270C | RRN9    | 1 unassigned | na      | 365 |
| YMR271C | URA10   | 1 psiblast   | 1lh0A_  | 227 |
| YMR272C | SCS7    | 1 psiblast   | 1bfx__  | 112 |
| YMR272C | SCS7    | 2 psiblast   | 1ndh__  | 66  |
| YMR272C | SCS7    | 3 msa        | na      | 206 |
| YMR273C | ZDS1    | 1 unassigned | na      | 247 |
| YMR273C | ZDS1    | 2 msa        | na      | 604 |
| YMR273C | ZDS1    | 3 unassigned | na      | 64  |
| YMR274C | RCE1    | 1 unassigned | na      | 89  |
| YMR274C | RCE1    | 2 pfam       | PF02517 | 226 |
| YMR275C | BUL1    | 1 msa        | na      | 98  |
| YMR275C | BUL1    | 2 msa        | na      | 470 |
| YMR275C | BUL1    | 3 unassigned | na      | 84  |
| YMR275C | BUL1    | 4 msa        | na      | 324 |
| YMR276W | DSK2    | 1 psiblast   | 1bt0A_  | 107 |
| YMR276W | DSK2    | 2 msa        | na      | 152 |
| YMR276W | DSK2    | 3 unassigned | na      | 70  |
| YMR276W | DSK2    | 4 psiblast   | 1f4iA_  | 44  |
| YMR277W | FCP1    | 1 unassigned | na      | 138 |
| YMR277W | FCP1    | 2 pfam       | PF03031 | 277 |
| YMR277W | FCP1    | 3 unassigned | na      | 74  |
| YMR277W | FCP1    | 4 psiblast   | 1jnxX_  | 152 |
| YMR277W | FCP1    | 5 msa        | na      | 91  |
| YMR278W | YMR278W | 1 psiblast   | 1c47A_  | 224 |
| YMR278W | YMR278W | 2 psiblast   | 1c47A_  | 153 |
| YMR278W | YMR278W | 3 psiblast   | 1c47A_  | 114 |
| YMR278W | YMR278W | 4 psiblast   | 1c47A_  | 131 |
| YMR279C | YMR279C | 1 psiblast   | 1ja5A_  | 473 |
| YMR279C | YMR279C | 2 psiblast   | 1ja5A_  | 67  |
| YMR280C | CAT8    | 1 psiblast   | 1d66A_  | 192 |
| YMR280C | CAT8    | 2 msa        | na      | 140 |
| YMR280C | CAT8    | 3 msa        | na      | 521 |
| YMR280C | CAT8    | 4 unassigned | na      | 580 |
| YMR281W | GPI12   | 1 msa        | na      | 250 |
| YMR281W | GPI12   | 2 unassigned | na      | 54  |
| YMR282C | AEP2    | 1 msa        | na      | 128 |
| YMR282C | AEP2    | 2 unassigned | na      | 452 |
| YMR283C | RIT1    | 1 msa        | na      | 324 |
| YMR283C | RIT1    | 2 unassigned | na      | 189 |
| YMR284W | YKU70   | 1 psiblast   | 1jeqA_  | 412 |

|           |           |   |            |         |     |
|-----------|-----------|---|------------|---------|-----|
| YMR284W   | YKU70     | 2 | psiblast   | 1jeqA_  | 190 |
| YMR285C   | NGL2      | 1 | psiblast   | 1hd7A_  | 358 |
| YMR285C   | NGL2      | 2 | msa        | na      | 157 |
| YMR286W   | MRPL33    | 1 | psiblast   | 1bxyA_  | 86  |
| YMR287C   | MSU1      | 1 | unassigned | na      | 434 |
| YMR287C   | MSU1      | 2 | pfam       | PF00773 | 418 |
| YMR287C   | MSU1      | 3 | unassigned | na      | 117 |
| YMR288W   | HSH155    | 1 | unassigned | na      | 71  |
| YMR288W   | HSH155    | 2 | msa        | na      | 102 |
| YMR288W   | HSH155    | 3 | unassigned | na      | 80  |
| YMR288W   | HSH155    | 4 | psiblast   | 1b3uA_  | 110 |
| YMR288W   | HSH155    | 5 | psiblast   | 1qgkA_  | 384 |
| YMR288W   | HSH155    | 6 | psiblast   | 1qgkA_  | 224 |
| YMR289W   | ABZ2      | 1 | psiblast   | 1i1kA_  | 215 |
| YMR289W   | ABZ2      | 2 | psiblast   | 1i1kA_  | 159 |
| YMR290C   | HAS1      | 1 | psiblast   | 1hv8A_  | 259 |
| YMR290C   | HAS1      | 2 | psiblast   | 1hv8A_  | 151 |
| YMR290C   | HAS1      | 3 | unassigned | na      | 95  |
| YMR290W-A | YMR290W-A | 1 | unassigned | na      | 115 |
| YMR291W   | YMR291W   | 1 | psiblast   | 1a06__  | 152 |
| YMR291W   | YMR291W   | 2 | psiblast   | 1a06__  | 237 |
| YMR291W   | YMR291W   | 3 | psiblast   | 1ew7C_  | 95  |
| YMR291W   | YMR291W   | 4 | unassigned | na      | 102 |
| YMR292W   | GOT1      | 1 | unassigned | na      | 138 |
| YMR293C   | YMR293C   | 1 | psiblast   | 1gr8A_  | 464 |
| YMR294W   | JNM1      | 1 | unassigned | na      | 373 |
| YMR294W-A | YMR294W-A | 1 | unassigned | na      | 119 |
| YMR295C   | YMR295C   | 1 | unassigned | na      | 197 |
| YMR296C   | LCB1      | 1 | unassigned | na      | 85  |
| YMR296C   | LCB1      | 2 | psiblast   | 1fc4A_  | 215 |
| YMR296C   | LCB1      | 3 | psiblast   | 1fc4A_  | 258 |
| YMR297W   | PRC1      | 1 | unassigned | na      | 78  |
| YMR297W   | PRC1      | 2 | psiblast   | 1ysc__  | 245 |
| YMR297W   | PRC1      | 3 | psiblast   | 1ysc__  | 209 |
| YMR298W   | YMR298W   | 1 | unassigned | na      | 150 |
| YMR299C   | DYN3      | 1 | unassigned | na      | 137 |
| YMR299C   | DYN3      | 2 | msa        | na      | 175 |
| YMR300C   | ADE4      | 1 | psiblast   | 1ecbA_  | 323 |
| YMR300C   | ADE4      | 2 | psiblast   | 1ecbA_  | 187 |
| YMR301C   | ATM1      | 1 | unassigned | na      | 67  |
| YMR301C   | ATM1      | 2 | psiblast   | 1jsqA_  | 329 |
| YMR301C   | ATM1      | 3 | psiblast   | 1jsqA_  | 294 |
| YMR302C   | PRP12     | 1 | msa        | na      | 178 |
| YMR302C   | PRP12     | 2 | pfam       | PF00076 | 158 |
| YMR302C   | PRP12     | 3 | unassigned | na      | 514 |
| YMR303C   | ADH2      | 1 | psiblast   | 1e3jA_  | 187 |
| YMR303C   | ADH2      | 2 | psiblast   | 1e3jA_  | 161 |
| YMR304C-A | YMR304C-A | 1 | unassigned | na      | 116 |

|           |           |   |                |         |     |
|-----------|-----------|---|----------------|---------|-----|
| YMR304W   | UBP15     | 1 | pfam           | PF00917 | 195 |
| YMR304W   | UBP15     | 2 | pfam           | PF00442 | 46  |
| YMR304W   | UBP15     | 3 | msa            | na      | 196 |
| YMR304W   | UBP15     | 4 | pfam           | PF00443 | 104 |
| YMR304W   | UBP15     | 5 | msa            | na      | 344 |
| YMR304W   | UBP15     | 6 | unassigned     | na      | 345 |
| YMR305C   | SCW10     | 1 | msa            | na      | 101 |
| YMR305C   | SCW10     | 2 | psiblast       | 1aq0A_  | 288 |
| YMR306C-A | YMR306C-A | 1 | unassigned     | na      | 129 |
| YMR306W   | FKS3      | 1 | unassigned     | na      | 142 |
| YMR306W   | FKS3      | 2 | msa            | na      | 528 |
| YMR306W   | FKS3      | 3 | pfam           | PF02364 | 907 |
| YMR306W   | FKS3      | 4 | msa            | na      | 208 |
| YMR307W   | GAS1      | 1 | pfam           | PF03198 | 342 |
| YMR307W   | GAS1      | 2 | msa            | na      | 217 |
| YMR308C   | PSE1      | 1 | psiblast       | 1qgkA_  | 246 |
| YMR308C   | PSE1      | 2 | psiblast       | 1qgkA_  | 193 |
| YMR308C   | PSE1      | 3 | psiblast       | 1qgkA_  | 95  |
| YMR308C   | PSE1      | 4 | psiblast       | 1qgkA_  | 98  |
| YMR308C   | PSE1      | 5 | psiblast       | 1qgkA_  | 278 |
| YMR308C   | PSE1      | 6 | msa            | na      | 179 |
| YMR309C   | NIP1      | 1 | msa            | na      | 646 |
| YMR309C   | NIP1      | 2 | unassigned     | na      | 60  |
| YMR309C   | NIP1      | 3 | pfam           | PF01399 | 106 |
| YMR310C   | YMR310C   | 1 | psiblast       | 1k3rA_  | 198 |
| YMR310C   | YMR310C   | 2 | psiblast       | 1k3rA_  | 119 |
| YMR311C   | GLC8      | 1 | unassigned     | na      | 88  |
| YMR311C   | GLC8      | 2 | msa            | na      | 141 |
| YMR312W   | ELP6      | 1 | unassigned     | na      | 273 |
| YMR313C   | TGL3      | 1 | msa            | na      | 185 |
| YMR313C   | TGL3      | 2 | pfam           | PF01734 | 227 |
| YMR313C   | TGL3      | 3 | unassigned     | na      | 230 |
| YMR314W   | PRE5      | 1 | psiblast       | 1fntF_  | 234 |
| YMR315W   | YMR315W   | 1 | psiblast       | 1evjA_  | 154 |
| YMR315W   | YMR315W   | 2 | psiblast       | 1evjA_  | 195 |
| YMR316C-A | YMR316C-A | 1 | unassigned     | na      | 103 |
| YMR316C-B | YMR316C-B | 1 | unassigned     | na      | 102 |
| YMR316W   | DIA1      | 1 | unassigned     | na      | 336 |
| YMR317W   | YMR317W   | 1 | msa            | na      | 362 |
| YMR317W   | YMR317W   | 2 | unassigned     | na      | 86  |
| YMR317W   | YMR317W   | 3 | msa            | na      | 606 |
| YMR317W   | YMR317W   | 4 | unassigned     | na      | 86  |
| YMR318C   | ADH6      | 1 | psiblast       | 1e3jA_  | 200 |
| YMR318C   | ADH6      | 2 | psiblast       | 1e3jA_  | 160 |
| YMR319C   | FET4      | 1 | fold_recogniti | 1itwA   | 189 |
| YMR319C   | FET4      | 2 | fold_recogniti | 1itwA   | 140 |
| YMR319C   | FET4      | 3 | unassigned     | na      | 223 |
| YMR320W   | YMR320W   | 1 | unassigned     | na      | 101 |

|         |         |   |                |         |     |
|---------|---------|---|----------------|---------|-----|
| YMR321C | YMR321C | 1 | unassigned     | na      | 105 |
| YMR322C | SNO4    | 1 | psiblast       | 1g2iA_  | 237 |
| YMR323W | YMR323W | 1 | psiblast       | 1els__  | 127 |
| YMR323W | YMR323W | 2 | psiblast       | 1els__  | 310 |
| YMR324C | YMR324C | 1 | unassigned     | na      | 80  |
| YMR325W | YMR325W | 1 | pfam           | PF00660 | 124 |
| YMR326C | YMR326C | 1 | unassigned     | na      | 102 |
| YNL001W | DOM34   | 1 | psiblast       | 1dt9A_  | 135 |
| YNL001W | DOM34   | 2 | psiblast       | 1dt9A_  | 140 |
| YNL001W | DOM34   | 3 | psiblast       | 1dt9A_  | 111 |
| YNL002C | RLP7    | 1 | unassigned     | na      | 136 |
| YNL002C | RLP7    | 2 | psiblast       | 1k5yF_  | 186 |
| YNL003C | PET8    | 1 | fold_recogniti | 1is2A   | 284 |
| YNL004W | HRB1    | 1 | psiblast       | 1cvjA_  | 123 |
| YNL004W | HRB1    | 2 | psiblast       | 1l3kA_  | 99  |
| YNL004W | HRB1    | 3 | psiblast       | 1l3kA_  | 115 |
| YNL004W | HRB1    | 4 | psiblast       | 2mssA_  | 92  |
| YNL005C | MRP7    | 1 | psiblast       | 1lnrU_  | 120 |
| YNL005C | MRP7    | 2 | unassigned     | na      | 251 |
| YNL006W | LST8    | 1 | psiblast       | 1erjA_  | 303 |
| YNL007C | SIS1    | 1 | psiblast       | 1bqz__  | 79  |
| YNL007C | SIS1    | 2 | fold_recogniti | 1la5A   | 101 |
| YNL007C | SIS1    | 3 | psiblast       | 1c3gA_  | 77  |
| YNL007C | SIS1    | 4 | psiblast       | 1c3gA_  | 95  |
| YNL008C | ASI3    | 1 | msa            | na      | 417 |
| YNL008C | ASI3    | 2 | unassigned     | na      | 67  |
| YNL008C | ASI3    | 3 | fold_recogniti | 1fbvA   | 132 |
| YNL008C | ASI3    | 4 | fold_recogniti | 1fbvA   | 53  |
| YNL009W | IDP3    | 1 | psiblast       | 1cnzA_  | 420 |
| YNL010W | YNL010W | 1 | psiblast       | 1jud__  | 60  |
| YNL010W | YNL010W | 2 | psiblast       | 1eulA_  | 181 |
| YNL011C | YNL011C | 1 | msa            | na      | 283 |
| YNL011C | YNL011C | 2 | unassigned     | na      | 161 |
| YNL012W | SPO1    | 1 | unassigned     | na      | 142 |
| YNL012W | SPO1    | 2 | psiblast       | 1cjyA_  | 159 |
| YNL012W | SPO1    | 3 | fold_recogniti | 1cjyA   | 235 |
| YNL013C | YNL013C | 1 | unassigned     | na      | 125 |
| YNL014W | HEF3    | 1 | msa            | na      | 321 |
| YNL014W | HEF3    | 2 | unassigned     | na      | 97  |
| YNL014W | HEF3    | 3 | psiblast       | 1b0uA_  | 227 |
| YNL014W | HEF3    | 4 | msa            | na      | 399 |
| YNL015W | PBI2    | 1 | unassigned     | na      | 75  |
| YNL016W | PUB1    | 1 | psiblast       | 1cvjA_  | 152 |
| YNL016W | PUB1    | 2 | psiblast       | 1cvjA_  | 123 |
| YNL016W | PUB1    | 3 | unassigned     | na      | 56  |
| YNL016W | PUB1    | 4 | psiblast       | 1bnyA_  | 122 |
| YNL017C | YNL017C | 1 | unassigned     | na      | 112 |
| YNL018C | YNL018C | 1 | unassigned     | na      | 612 |



|         |         |   |                |         |     |
|---------|---------|---|----------------|---------|-----|
| YNL019C | YNL019C | 1 | unassigned     | na      | 284 |
| YNL020C | ARK1    | 1 | psiblast       | 2phkA_  | 92  |
| YNL020C | ARK1    | 2 | psiblast       | 2phkA_  | 243 |
| YNL020C | ARK1    | 3 | psiblast       | 1cdIA_  | 79  |
| YNL020C | ARK1    | 4 | psiblast       | 1cdIA_  | 107 |
| YNL020C | ARK1    | 5 | unassigned     | na      | 117 |
| YNL021W | HDA1    | 1 | psiblast       | 1c3pA_  | 236 |
| YNL021W | HDA1    | 2 | psiblast       | 1c3pA_  | 200 |
| YNL021W | HDA1    | 3 | unassigned     | na      | 270 |
| YNL022C | YNL022C | 1 | msa            | na      | 96  |
| YNL022C | YNL022C | 2 | unassigned     | na      | 56  |
| YNL022C | YNL022C | 3 | psiblast       | 1jg1A_  | 71  |
| YNL022C | YNL022C | 4 | psiblast       | 1j4fA_  | 267 |
| YNL023C | FAP1    | 1 | fold_recogniti | 1jv2B   | 284 |
| YNL023C | FAP1    | 2 | psiblast       | 1klo__  | 127 |
| YNL023C | FAP1    | 3 | psiblast       | 1jv2B_  | 221 |
| YNL023C | FAP1    | 4 | psiblast       | 1dcxB_  | 79  |
| YNL023C | FAP1    | 5 | fold_recogniti | 1mszA   | 133 |
| YNL023C | FAP1    | 6 | unassigned     | na      | 121 |
| YNL024C | YNL024C | 1 | psiblast       | 1g6q1_  | 246 |
| YNL025C | SSN8    | 1 | psiblast       | 1jkw__  | 222 |
| YNL025C | SSN8    | 2 | psiblast       | 1jkw__  | 101 |
| YNL026W | SAM50   | 1 | unassigned     | na      | 100 |
| YNL026W | SAM50   | 2 | msa            | na      | 384 |
| YNL027W | CRZ1    | 1 | msa            | na      | 148 |
| YNL027W | CRZ1    | 2 | msa            | na      | 98  |
| YNL027W | CRZ1    | 3 | psiblast       | 1tf6A_  | 196 |
| YNL027W | CRZ1    | 4 | msa            | na      | 117 |
| YNL027W | CRZ1    | 5 | psiblast       | 1meyG_  | 119 |
| YNL028W | YNL028W | 1 | unassigned     | na      | 105 |
| YNL029C | KTR5    | 1 | pfam           | PF01793 | 443 |
| YNL029C | KTR5    | 2 | unassigned     | na      | 79  |
| YNL032W | SIW14   | 1 | unassigned     | na      | 84  |
| YNL032W | SIW14   | 2 | psiblast       | 1d5rA_  | 117 |
| YNL032W | SIW14   | 3 | psiblast       | 1d5rA_  | 80  |
| YNL033W | YNL033W | 1 | unassigned     | na      | 284 |
| YNL034W | YNL034W | 1 | unassigned     | na      | 612 |
| YNL035C | YNL035C | 1 | psiblast       | 1gg2B_  | 389 |
| YNL036W | NCE103  | 1 | psiblast       | 1ddzA_  | 47  |
| YNL036W | NCE103  | 2 | psiblast       | 1ddzA_  | 174 |
| YNL037C | IDH1    | 1 | psiblast       | 1xac__  | 360 |
| YNL038W | GPI15   | 1 | unassigned     | na      | 91  |
| YNL038W | GPI15   | 2 | msa            | na      | 121 |
| YNL039W | BDP1    | 1 | msa            | na      | 384 |
| YNL039W | BDP1    | 2 | pfam           | PF00249 | 94  |
| YNL039W | BDP1    | 3 | msa            | na      | 116 |
| YNL040W | YNL040W | 1 | unassigned     | na      | 59  |
| YNL040W | YNL040W | 2 | psiblast       | 1qf6A_  | 316 |

|         |         |   |                |         |     |
|---------|---------|---|----------------|---------|-----|
| YNL040W | YNL040W | 3 | msa            | na      | 81  |
| YNL041C | COG6    | 1 | unassigned     | na      | 119 |
| YNL041C | COG6    | 2 | msa            | na      | 392 |
| YNL041C | COG6    | 3 | unassigned     | na      | 95  |
| YNL041C | COG6    | 4 | fold_recogniti | 1n1bA   | 233 |
| YNL042W | BOP3    | 1 | unassigned     | na      | 125 |
| YNL042W | BOP3    | 2 | msa            | na      | 126 |
| YNL042W | BOP3    | 3 | unassigned     | na      | 145 |
| YNL043C | YNL043C | 1 | unassigned     | na      | 106 |
| YNL044W | YIP3    | 1 | pfam           | PF03208 | 176 |
| YNL045W | YNL045W | 1 | psiblast       | 1hs6A_  | 253 |
| YNL045W | YNL045W | 2 | psiblast       | 1hs6A_  | 85  |
| YNL045W | YNL045W | 3 | psiblast       | 1hs6A_  | 170 |
| YNL045W | YNL045W | 4 | psiblast       | 1hs6A_  | 163 |
| YNL046W | YNL046W | 1 | unassigned     | na      | 172 |
| YNL047C | LIT1    | 1 | unassigned     | na      | 121 |
| YNL047C | LIT1    | 2 | fold_recogniti | 1i84S   | 168 |
| YNL047C | LIT1    | 3 | fold_recogniti | 1i84S   | 115 |
| YNL047C | LIT1    | 4 | psiblast       | 1fhwA_  | 191 |
| YNL047C | LIT1    | 5 | unassigned     | na      | 61  |
| YNL048W | ALG11   | 1 | unassigned     | na      | 69  |
| YNL048W | ALG11   | 2 | fold_recogniti | 1iirA   | 206 |
| YNL048W | ALG11   | 3 | fold_recogniti | 1iirA   | 83  |
| YNL048W | ALG11   | 4 | fold_recogniti | 1iirA   | 190 |
| YNL049C | SFB2    | 1 | fold_recogniti | 1k83A   | 215 |
| YNL049C | SFB2    | 2 | fold_recogniti | 1fe8A   | 328 |
| YNL049C | SFB2    | 3 | unassigned     | na      | 185 |
| YNL049C | SFB2    | 4 | psiblast       | 1svq__  | 65  |
| YNL049C | SFB2    | 5 | fold_recogniti | 1m2vB   | 83  |
| YNL050C | YNL050C | 1 | unassigned     | na      | 270 |
| YNL051W | COG5    | 1 | msa            | na      | 179 |
| YNL051W | COG5    | 2 | msa            | na      | 224 |
| YNL052W | COX5A   | 1 | psiblast       | 1occD_  | 103 |
| YNL052W | COX5A   | 2 | psiblast       | 1occD_  | 50  |
| YNL053W | MSG5    | 1 | msa            | na      | 216 |
| YNL053W | MSG5    | 2 | psiblast       | 1mkp__  | 187 |
| YNL053W | MSG5    | 3 | msa            | na      | 86  |
| YNL054W | VAC7    | 1 | unassigned     | na      | 260 |
| YNL054W | VAC7    | 2 | msa            | na      | 460 |
| YNL054W | VAC7    | 3 | unassigned     | na      | 445 |
| YNL055C | POR1    | 1 | pfam           | PF01459 | 283 |
| YNL056W | YNL056W | 1 | psiblast       | 1mkp__  | 197 |
| YNL057W | YNL057W | 1 | unassigned     | na      | 110 |
| YNL058C | YNL058C | 1 | unassigned     | na      | 316 |
| YNL059C | ARP5    | 1 | psiblast       | 1yagA_  | 279 |
| YNL059C | ARP5    | 2 | psiblast       | 1i84S_  | 314 |
| YNL059C | ARP5    | 3 | msa            | na      | 162 |
| YNL061W | NOP2    | 1 | msa            | na      | 215 |

|           |           |   |                |         |     |
|-----------|-----------|---|----------------|---------|-----|
| YNL061W   | NOP2      | 2 | msa            | na      | 96  |
| YNL061W   | NOP2      | 3 | psiblast       | 1j4fA_  | 307 |
| YNL062C   | GCD10     | 1 | msa            | na      | 324 |
| YNL062C   | GCD10     | 2 | unassigned     | na      | 154 |
| YNL063W   | YNL063W   | 1 | unassigned     | na      | 69  |
| YNL063W   | YNL063W   | 2 | psiblast       | 1dusA_  | 245 |
| YNL064C   | YDJ1      | 1 | psiblast       | 1hdj__  | 112 |
| YNL064C   | YDJ1      | 2 | psiblast       | 1exkA_  | 84  |
| YNL064C   | YDJ1      | 3 | psiblast       | 1c3gA_  | 59  |
| YNL064C   | YDJ1      | 4 | psiblast       | 1c3gA_  | 154 |
| YNL065W   | AQR1      | 1 | unassigned     | na      | 83  |
| YNL065W   | AQR1      | 2 | psiblast       | 1ja5A_  | 420 |
| YNL065W   | AQR1      | 3 | psiblast       | 1ja5A_  | 83  |
| YNL066W   | SUN4      | 1 | fold_recogniti | 1kapP   | 175 |
| YNL066W   | SUN4      | 2 | fold_recogniti | 1kapP   | 68  |
| YNL066W   | SUN4      | 3 | fold_recogniti | 1kapP   | 80  |
| YNL066W   | SUN4      | 4 | fold_recogniti | 1kapP   | 97  |
| YNL067W   | RPL9B     | 1 | psiblast       | 1k5yH_  | 84  |
| YNL067W   | RPL9B     | 2 | psiblast       | 1k5yH_  | 107 |
| YNL067W-A | YNL067W-A | 1 | unassigned     | na      | 48  |
| YNL068C   | FKH2      | 1 | fold_recogniti | 1g3gA   | 214 |
| YNL068C   | FKH2      | 2 | unassigned     | na      | 123 |
| YNL068C   | FKH2      | 3 | psiblast       | 1d5vA_  | 93  |
| YNL068C   | FKH2      | 4 | fold_recogniti | 1k83A   | 432 |
| YNL069C   | RPL16B    | 1 | psiblast       | 1k5yM_  | 198 |
| YNL070W   | TOM7      | 1 | unassigned     | na      | 60  |
| YNL071W   | LAT1      | 1 | psiblast       | 1fyc__  | 161 |
| YNL071W   | LAT1      | 2 | psiblast       | 1ebdC_  | 72  |
| YNL071W   | LAT1      | 3 | psiblast       | 1c4tA_  | 249 |
| YNL072W   | RNH201    | 1 | psiblast       | 1io2A_  | 205 |
| YNL072W   | RNH201    | 2 | psiblast       | 1io2A_  | 102 |
| YNL073W   | MSK1      | 1 | psiblast       | 1e1oA_  | 204 |
| YNL073W   | MSK1      | 2 | psiblast       | 1e1oA_  | 372 |
| YNL074C   | MLF3      | 1 | msa            | na      | 254 |
| YNL074C   | MLF3      | 2 | unassigned     | na      | 198 |
| YNL075W   | IMP4      | 1 | unassigned     | na      | 87  |
| YNL075W   | IMP4      | 2 | pfam           | PF01945 | 203 |
| YNL076W   | MKS1      | 1 | unassigned     | na      | 584 |
| YNL077W   | APJ1      | 1 | psiblast       | 1bq0__  | 129 |
| YNL077W   | APJ1      | 2 | psiblast       | 1exkA_  | 130 |
| YNL077W   | APJ1      | 3 | psiblast       | 1c3gA_  | 198 |
| YNL077W   | APJ1      | 4 | unassigned     | na      | 71  |
| YNL078W   | NIS1      | 1 | unassigned     | na      | 407 |
| YNL079C   | TPM1      | 1 | psiblast       | 2tmaA_  | 91  |
| YNL079C   | TPM1      | 2 | psiblast       | 2tmaA_  | 108 |
| YNL080C   | YNL080C   | 1 | fold_recogniti | 1e6vB   | 275 |
| YNL080C   | YNL080C   | 2 | fold_recogniti | 1e6vB   | 91  |
| YNL081C   | SWS2      | 1 | psiblast       | 1fjgM_  | 74  |

|         |         |   |                |         |     |
|---------|---------|---|----------------|---------|-----|
| YNL081C | SWS2    | 2 | psiblast       | 1fjgM_  | 69  |
| YNL082W | PMS1    | 1 | psiblast       | 1ea6A_  | 249 |
| YNL082W | PMS1    | 2 | psiblast       | 1ea6A_  | 162 |
| YNL082W | PMS1    | 3 | psiblast       | 1lwzA_  | 204 |
| YNL082W | PMS1    | 4 | unassigned     | na      | 83  |
| YNL082W | PMS1    | 5 | msa            | na      | 206 |
| YNL083W | YNL083W | 1 | psiblast       | 1jfjA_  | 93  |
| YNL083W | YNL083W | 2 | unassigned     | na      | 63  |
| YNL083W | YNL083W | 3 | msa            | na      | 64  |
| YNL083W | YNL083W | 4 | pfam           | PF00153 | 119 |
| YNL083W | YNL083W | 5 | pfam           | PF00153 | 155 |
| YNL084C | END3    | 1 | psiblast       | 1eh2__  | 98  |
| YNL084C | END3    | 2 | unassigned     | na      | 82  |
| YNL084C | END3    | 3 | psiblast       | 1iq5A_  | 94  |
| YNL084C | END3    | 4 | msa            | na      | 75  |
| YNL085W | MKT1    | 1 | psiblast       | 1b43A_  | 303 |
| YNL085W | MKT1    | 2 | psiblast       | 1b43A_  | 69  |
| YNL085W | MKT1    | 3 | psiblast       | 1xwl__  | 67  |
| YNL085W | MKT1    | 4 | unassigned     | na      | 123 |
| YNL085W | MKT1    | 5 | msa            | na      | 268 |
| YNL086W | YNL086W | 1 | unassigned     | na      | 102 |
| YNL087W | TCB2    | 1 | unassigned     | na      | 206 |
| YNL087W | TCB2    | 2 | psiblast       | 1dqvA_  | 156 |
| YNL087W | TCB2    | 3 | psiblast       | 1dqvA_  | 126 |
| YNL087W | TCB2    | 4 | fold_recogniti | 1bynA   | 134 |
| YNL087W | TCB2    | 5 | psiblast       | 1k5wA_  | 159 |
| YNL087W | TCB2    | 6 | unassigned     | na      | 141 |
| YNL087W | TCB2    | 7 | psiblast       | 1rsy__  | 197 |
| YNL087W | TCB2    | 8 | msa            | na      | 59  |
| YNL088W | TOP2    | 1 | psiblast       | 1ei1A_  | 248 |
| YNL088W | TOP2    | 2 | psiblast       | 1ei1A_  | 157 |
| YNL088W | TOP2    | 3 | psiblast       | 1bgw__  | 209 |
| YNL088W | TOP2    | 4 | psiblast       | 1bgw__  | 225 |
| YNL088W | TOP2    | 5 | psiblast       | 1bgw__  | 368 |
| YNL088W | TOP2    | 6 | msa            | na      | 221 |
| YNL089C | YNL089C | 1 | unassigned     | na      | 158 |
| YNL090W | RHO2    | 1 | psiblast       | 1ftn__  | 192 |
| YNL091W | NST1    | 1 | psiblast       | 1c1gA_  | 135 |
| YNL091W | NST1    | 2 | psiblast       | 1i84S_  | 361 |
| YNL091W | NST1    | 3 | msa            | na      | 280 |
| YNL091W | NST1    | 4 | fold_recogniti | 1ldvA   | 317 |
| YNL091W | NST1    | 5 | unassigned     | na      | 147 |
| YNL092W | YNL092W | 1 | msa            | na      | 319 |
| YNL092W | YNL092W | 2 | unassigned     | na      | 81  |
| YNL093W | YPT53   | 1 | psiblast       | 1ek0A_  | 220 |
| YNL094W | APP1    | 1 | unassigned     | na      | 159 |
| YNL094W | APP1    | 2 | msa            | na      | 315 |
| YNL094W | APP1    | 3 | unassigned     | na      | 113 |

|         |         |   |                |         |     |
|---------|---------|---|----------------|---------|-----|
| YNL095C | YNL095C | 1 | msa            | na      | 181 |
| YNL095C | YNL095C | 2 | unassigned     | na      | 461 |
| YNL096C | RPS7B   | 1 | pfam           | PF01251 | 190 |
| YNL097C | PHO23   | 1 | fold_recogniti | 2vsgA   | 162 |
| YNL097C | PHO23   | 2 | fold_recogniti | 2vsgA   | 45  |
| YNL097C | PHO23   | 3 | unassigned     | na      | 66  |
| YNL097C | PHO23   | 4 | psiblast       | 1f62A_  | 57  |
| YNL098C | RAS2    | 1 | psiblast       | 821p__  | 185 |
| YNL098C | RAS2    | 2 | msa            | na      | 137 |
| YNL099C | OCA1    | 1 | psiblast       | 1vhrA_  | 238 |
| YNL100W | YNL100W | 1 | unassigned     | na      | 234 |
| YNL101W | AVT4    | 1 | unassigned     | na      | 234 |
| YNL101W | AVT4    | 2 | pfam           | PF01490 | 479 |
| YNL102W | POL1    | 1 | msa            | na      | 338 |
| YNL102W | POL1    | 2 | psiblast       | 1qhtA_  | 387 |
| YNL102W | POL1    | 3 | psiblast       | 1qhtA_  | 230 |
| YNL102W | POL1    | 4 | psiblast       | 1qhtA_  | 114 |
| YNL102W | POL1    | 5 | psiblast       | 1qhtA_  | 230 |
| YNL102W | POL1    | 6 | unassigned     | na      | 169 |
| YNL103W | MET4    | 1 | unassigned     | na      | 174 |
| YNL103W | MET4    | 2 | fold_recogniti | 1k83A   | 377 |
| YNL103W | MET4    | 3 | fold_recogniti | 1m2vB   | 121 |
| YNL104C | LEU4    | 1 | fold_recogniti | 1e1cA   | 476 |
| YNL104C | LEU4    | 2 | msa            | na      | 143 |
| YNL105W | YNL105W | 1 | unassigned     | na      | 142 |
| YNL106C | INP52   | 1 | pfam           | PF02383 | 475 |
| YNL106C | INP52   | 2 | unassigned     | na      | 84  |
| YNL106C | INP52   | 3 | psiblast       | 1i9yA_  | 379 |
| YNL106C | INP52   | 4 | fold_recogniti | 1deqA   | 245 |
| YNL107W | YAF9    | 1 | pfam           | PF03366 | 123 |
| YNL107W | YAF9    | 2 | unassigned     | na      | 103 |
| YNL108C | YNL108C | 1 | psiblast       | 1bif__  | 270 |
| YNL109W | YNL109W | 1 | unassigned     | na      | 181 |
| YNL110C | NOP15   | 1 | psiblast       | 1fxIA_  | 86  |
| YNL110C | NOP15   | 2 | psiblast       | 1fxIA_  | 134 |
| YNL111C | CYB5    | 1 | psiblast       | 1eueA_  | 120 |
| YNL112W | DBP2    | 1 | unassigned     | na      | 80  |
| YNL112W | DBP2    | 2 | psiblast       | 1hv8A_  | 247 |
| YNL112W | DBP2    | 3 | psiblast       | 1hv8A_  | 219 |
| YNL113W | RPC19   | 1 | psiblast       | 1k83K_  | 142 |
| YNL114C | YNL114C | 1 | unassigned     | na      | 123 |
| YNL115C | YNL115C | 1 | unassigned     | na      | 58  |
| YNL115C | YNL115C | 2 | msa            | na      | 156 |
| YNL115C | YNL115C | 3 | unassigned     | na      | 94  |
| YNL115C | YNL115C | 4 | psiblast       | 1a88A_  | 282 |
| YNL115C | YNL115C | 5 | unassigned     | na      | 54  |
| YNL116W | YNL116W | 1 | fold_recogniti | 1ldvA   | 234 |
| YNL116W | YNL116W | 2 | unassigned     | na      | 71  |

|         |         |   |                |         |     |
|---------|---------|---|----------------|---------|-----|
| YNL116W | YNL116W | 3 | fold_recogniti | 1g3gA   | 103 |
| YNL116W | YNL116W | 4 | psiblast       | 1chc__  | 114 |
| YNL117W | MLS1    | 1 | fold_recogniti | 1d8cA   | 104 |
| YNL117W | MLS1    | 2 | psiblast       | 1d8cA_  | 317 |
| YNL117W | MLS1    | 3 | psiblast       | 1d8cA_  | 133 |
| YNL118C | DCP2    | 1 | unassigned     | na      | 64  |
| YNL118C | DCP2    | 2 | psiblast       | 1mut__  | 203 |
| YNL118C | DCP2    | 3 | fold_recogniti | 1deqA   | 241 |
| YNL118C | DCP2    | 4 | unassigned     | na      | 79  |
| YNL118C | DCP2    | 5 | fold_recogniti | 1l8mA   | 90  |
| YNL118C | DCP2    | 6 | fold_recogniti | 1l8mA   | 73  |
| YNL118C | DCP2    | 7 | fold_recogniti | 1l8mA   | 83  |
| YNL118C | DCP2    | 8 | fold_recogniti | 1l8mA   | 70  |
| YNL118C | DCP2    | 9 | unassigned     | na      | 67  |
| YNL119W | NCS2    | 1 | fold_recogniti | 1kh1A   | 304 |
| YNL119W | NCS2    | 2 | unassigned     | na      | 189 |
| YNL120C | YNL120C | 1 | unassigned     | na      | 161 |
| YNL121C | TOM70   | 1 | unassigned     | na      | 90  |
| YNL121C | TOM70   | 2 | psiblast       | 1a17__  | 104 |
| YNL121C | TOM70   | 3 | unassigned     | na      | 124 |
| YNL121C | TOM70   | 4 | psiblast       | 1elrA_  | 111 |
| YNL121C | TOM70   | 5 | fold_recogniti | 1hxiA   | 69  |
| YNL121C | TOM70   | 6 | psiblast       | 1ihgA_  | 119 |
| YNL122C | YNL122C | 1 | unassigned     | na      | 115 |
| YNL123W | YNL123W | 1 | psiblast       | 1lcyA_  | 295 |
| YNL123W | YNL123W | 2 | psiblast       | 1lcyA_  | 93  |
| YNL123W | YNL123W | 3 | psiblast       | 1fc7A_  | 118 |
| YNL123W | YNL123W | 4 | psiblast       | 1ky9A_  | 250 |
| YNL123W | YNL123W | 5 | psiblast       | 1ky9A_  | 241 |
| YNL124W | NAF1    | 1 | unassigned     | na      | 126 |
| YNL124W | NAF1    | 2 | psiblast       | 1k83A_  | 165 |
| YNL124W | NAF1    | 3 | msa            | na      | 201 |
| YNL125C | ESBP6   | 1 | unassigned     | na      | 179 |
| YNL125C | ESBP6   | 2 | psiblast       | 1ja5A_  | 494 |
| YNL126W | SPC98   | 1 | unassigned     | na      | 158 |
| YNL126W | SPC98   | 2 | fold_recogniti | 1b89A   | 549 |
| YNL126W | SPC98   | 3 | unassigned     | na      | 139 |
| YNL127W | FAR11   | 1 | unassigned     | na      | 191 |
| YNL127W | FAR11   | 2 | msa            | na      | 762 |
| YNL128W | TEP1    | 1 | psiblast       | 1d5rA_  | 180 |
| YNL128W | TEP1    | 2 | psiblast       | 1d5rA_  | 144 |
| YNL128W | TEP1    | 3 | unassigned     | na      | 110 |
| YNL129W | YNL129W | 1 | psiblast       | 1g291_  | 240 |
| YNL130C | CPT1    | 1 | unassigned     | na      | 68  |
| YNL130C | CPT1    | 2 | pfam           | PF01066 | 178 |
| YNL130C | CPT1    | 3 | msa            | na      | 140 |
| YNL131W | TOM22   | 1 | unassigned     | na      | 152 |
| YNL132W | KRE33   | 1 | unassigned     | na      | 101 |

|         |         |   |                |         |      |
|---------|---------|---|----------------|---------|------|
| YNL132W | KRE33   | 2 | msa            | na      | 619  |
| YNL132W | KRE33   | 3 | msa            | na      | 94   |
| YNL132W | KRE33   | 4 | unassigned     | na      | 242  |
| YNL133C | FYV6    | 1 | unassigned     | na      | 173  |
| YNL134C | YNL134C | 1 | psiblast       | 1tehA_  | 227  |
| YNL134C | YNL134C | 2 | psiblast       | 1tehA_  | 149  |
| YNL135C | FPR1    | 1 | psiblast       | 1yat__  | 114  |
| YNL136W | EAF7    | 1 | unassigned     | na      | 121  |
| YNL136W | EAF7    | 2 | fold_recogniti | 1ldvA   | 304  |
| YNL137C | NAM9    | 1 | psiblast       | 1fkaD_  | 148  |
| YNL137C | NAM9    | 2 | psiblast       | 1fkaD_  | 111  |
| YNL137C | NAM9    | 3 | unassigned     | na      | 227  |
| YNL138W | SRV2    | 1 | fold_recogniti | 1k7IA   | 199  |
| YNL138W | SRV2    | 2 | fold_recogniti | 1k7IA   | 48   |
| YNL138W | SRV2    | 3 | msa            | na      | 106  |
| YNL138W | SRV2    | 4 | psiblast       | 1k4zA_  | 173  |
| YNL139C | RLR1    | 1 | unassigned     | na      | 1111 |
| YNL139C | RLR1    | 2 | psiblast       | 1i84S_  | 378  |
| YNL139C | RLR1    | 3 | msa            | na      | 108  |
| YNL140C | YNL140C | 1 | unassigned     | na      | 189  |
| YNL141W | AAH1    | 1 | psiblast       | 1m7mA_  | 347  |
| YNL142W | MEP2    | 1 | pfam           | PF00909 | 499  |
| YNL143C | YNL143C | 1 | unassigned     | na      | 130  |
| YNL144C | YNL144C | 1 | unassigned     | na      | 363  |
| YNL144C | YNL144C | 2 | fold_recogniti | 1I8mA   | 74   |
| YNL144C | YNL144C | 3 | fold_recogniti | 1I8mA   | 78   |
| YNL144C | YNL144C | 4 | fold_recogniti | 1I8mA   | 70   |
| YNL144C | YNL144C | 5 | fold_recogniti | 1I8mA   | 94   |
| YNL144C | YNL144C | 6 | unassigned     | na      | 61   |
| YNL145W | MFA2    | 1 | unassigned     | na      | 38   |
| YNL146W | YNL146W | 1 | unassigned     | na      | 100  |
| YNL147W | LSM7    | 1 | psiblast       | 1d3bB_  | 107  |
| YNL148C | ALF1    | 1 | msa            | na      | 142  |
| YNL148C | ALF1    | 2 | psiblast       | 1IplA_  | 112  |
| YNL149C | YNL149C | 1 | fold_recogniti | 1JgsA   | 129  |
| YNL150W | YNL150W | 1 | unassigned     | na      | 135  |
| YNL151C | RPC31   | 1 | unassigned     | na      | 251  |
| YNL152W | YNL152W | 1 | psiblast       | 1dqvA_  | 160  |
| YNL152W | YNL152W | 2 | unassigned     | na      | 124  |
| YNL152W | YNL152W | 3 | psiblast       | 1i5hW_  | 69   |
| YNL152W | YNL152W | 4 | unassigned     | na      | 56   |
| YNL153C | GIM3    | 1 | unassigned     | na      | 129  |
| YNL154C | YCK2    | 1 | psiblast       | 1csn__  | 134  |
| YNL154C | YCK2    | 2 | psiblast       | 1csn__  | 75   |
| YNL154C | YCK2    | 3 | psiblast       | 1csn__  | 175  |
| YNL154C | YCK2    | 4 | unassigned     | na      | 162  |
| YNL155W | YNL155W | 1 | pfam           | PF01428 | 64   |
| YNL155W | YNL155W | 2 | unassigned     | na      | 210  |

|           |           |   |                |         |     |
|-----------|-----------|---|----------------|---------|-----|
| YNL156C   | NSG2      | 1 | unassigned     | na      | 63  |
| YNL156C   | NSG2      | 2 | fold_recogniti | 1jfaA   | 236 |
| YNL157W   | YNL157W   | 1 | unassigned     | na      | 168 |
| YNL158W   | YNL158W   | 1 | unassigned     | na      | 198 |
| YNL159C   | ASI2      | 1 | unassigned     | na      | 289 |
| YNL160W   | YGP1      | 1 | psiblast       | 1agx__  | 250 |
| YNL160W   | YGP1      | 2 | psiblast       | 1agx__  | 104 |
| YNL161W   | CBK1      | 1 | unassigned     | na      | 323 |
| YNL161W   | CBK1      | 2 | psiblast       | 1lhxA_  | 180 |
| YNL161W   | CBK1      | 3 | unassigned     | na      | 133 |
| YNL161W   | CBK1      | 4 | psiblast       | 1ctpE_  | 120 |
| YNL162W-A | YNL162W-A | 1 | unassigned     | na      | 72  |
| YNL163C   | RIA1      | 1 | psiblast       | 1dar__  | 372 |
| YNL163C   | RIA1      | 2 | psiblast       | 1dar__  | 156 |
| YNL163C   | RIA1      | 3 | psiblast       | 1dar__  | 198 |
| YNL163C   | RIA1      | 4 | fold_recogniti | 1efgA   | 248 |
| YNL163C   | RIA1      | 5 | psiblast       | 1jqsC_  | 73  |
| YNL163C   | RIA1      | 6 | msa            | na      | 63  |
| YNL164C   | IBD2      | 1 | unassigned     | na      | 351 |
| YNL165W   | YNL165W   | 1 | unassigned     | na      | 406 |
| YNL166C   | BNI5      | 1 | fold_recogniti | 1I8mA   | 113 |
| YNL166C   | BNI5      | 2 | fold_recogniti | 1I8mA   | 77  |
| YNL166C   | BNI5      | 3 | fold_recogniti | 1I8mA   | 76  |
| YNL166C   | BNI5      | 4 | unassigned     | na      | 182 |
| YNL167C   | SKO1      | 1 | fold_recogniti | 1ei3A   | 129 |
| YNL167C   | SKO1      | 2 | fold_recogniti | 1I8mA   | 79  |
| YNL167C   | SKO1      | 3 | fold_recogniti | 1I8mA   | 73  |
| YNL167C   | SKO1      | 4 | fold_recogniti | 1I8mA   | 79  |
| YNL167C   | SKO1      | 5 | fold_recogniti | 1I8mA   | 70  |
| YNL167C   | SKO1      | 6 | psiblast       | 1dh3A_  | 123 |
| YNL167C   | SKO1      | 7 | unassigned     | na      | 94  |
| YNL168C   | FMP41     | 1 | psiblast       | 1gttA_  | 259 |
| YNL169C   | PSD1      | 1 | msa            | na      | 175 |
| YNL169C   | PSD1      | 2 | pfam           | PF02666 | 325 |
| YNL170W   | YNL170W   | 1 | unassigned     | na      | 131 |
| YNL171C   | YNL171C   | 1 | unassigned     | na      | 122 |
| YNL172W   | APC1      | 1 | unassigned     | na      | 591 |
| YNL172W   | APC1      | 2 | msa            | na      | 854 |
| YNL172W   | APC1      | 3 | unassigned     | na      | 117 |
| YNL172W   | APC1      | 4 | msa            | na      | 83  |
| YNL172W   | APC1      | 5 | unassigned     | na      | 103 |
| YNL173C   | MDG1      | 1 | fold_recogniti | 1m2vB   | 366 |
| YNL174W   | YNL174W   | 1 | unassigned     | na      | 190 |
| YNL175C   | NOP13     | 1 | psiblast       | 1cvjA_  | 112 |
| YNL175C   | NOP13     | 2 | psiblast       | 1I3kA_  | 115 |
| YNL175C   | NOP13     | 3 | psiblast       | 1I3kA_  | 101 |
| YNL175C   | NOP13     | 4 | psiblast       | 1b7fA_  | 75  |
| YNL176C   | YNL176C   | 1 | unassigned     | na      | 76  |



|         |         |   |                |         |     |
|---------|---------|---|----------------|---------|-----|
| YNL176C | YNL176C | 2 | fold_recogniti | 1mvmA   | 151 |
| YNL176C | YNL176C | 3 | fold_recogniti | 1mvmA   | 173 |
| YNL176C | YNL176C | 4 | fold_recogniti | 1ei3A   | 135 |
| YNL176C | YNL176C | 5 | unassigned     | na      | 101 |
| YNL177C | MRPL22  | 1 | unassigned     | na      | 124 |
| YNL177C | MRPL22  | 2 | psiblast       | 1lnrQ_  | 185 |
| YNL178W | RPS3    | 1 | psiblast       | 1k5xC_  | 91  |
| YNL178W | RPS3    | 2 | psiblast       | 1k5xC_  | 149 |
| YNL179C | SRF6    | 1 | unassigned     | na      | 145 |
| YNL180C | RHO5    | 1 | psiblast       | 1i4dD_  | 279 |
| YNL180C | RHO5    | 2 | unassigned     | na      | 52  |
| YNL181W | YNL181W | 1 | psiblast       | 1gcoA_  | 407 |
| YNL182C | IPI3    | 1 | psiblast       | 1erjA_  | 167 |
| YNL182C | IPI3    | 2 | psiblast       | 1gg2B_  | 388 |
| YNL183C | NPR1    | 1 | unassigned     | na      | 393 |
| YNL183C | NPR1    | 2 | psiblast       | 1aq1__  | 126 |
| YNL183C | NPR1    | 3 | psiblast       | 1aq1__  | 129 |
| YNL183C | NPR1    | 4 | psiblast       | 1aq1__  | 51  |
| YNL183C | NPR1    | 5 | psiblast       | 1aq1__  | 91  |
| YNL184C | YNL184C | 1 | unassigned     | na      | 108 |
| YNL185C | MRPL19  | 1 | psiblast       | 1giyL_  | 74  |
| YNL185C | MRPL19  | 2 | psiblast       | 1giyL_  | 84  |
| YNL186W | UBP10   | 1 | fold_recogniti | 1ldvA   | 260 |
| YNL186W | UBP10   | 2 | unassigned     | na      | 63  |
| YNL186W | UBP10   | 3 | pfam           | PF00442 | 103 |
| YNL186W | UBP10   | 4 | msa            | na      | 134 |
| YNL186W | UBP10   | 5 | unassigned     | na      | 89  |
| YNL186W | UBP10   | 6 | pfam           | PF00443 | 143 |
| YNL187W | YNL187W | 1 | unassigned     | na      | 357 |
| YNL188W | KAR1    | 1 | unassigned     | na      | 96  |
| YNL188W | KAR1    | 2 | unassigned     | na      | 122 |
| YNL188W | KAR1    | 3 | unassigned     | na      | 111 |
| YNL188W | KAR1    | 4 | unassigned     | na      | 104 |
| YNL189W | SRP1    | 1 | psiblast       | 1qgkB_  | 62  |
| YNL189W | SRP1    | 2 | psiblast       | 1bk5A_  | 143 |
| YNL189W | SRP1    | 3 | psiblast       | 1bk5A_  | 167 |
| YNL189W | SRP1    | 4 | psiblast       | 1bk5A_  | 170 |
| YNL190W | YNL190W | 1 | unassigned     | na      | 204 |
| YNL191W | YNL191W | 1 | psiblast       | 1jxaA_  | 357 |
| YNL192W | CHS1    | 1 | psiblast       | 1deqA_  | 142 |
| YNL192W | CHS1    | 2 | fold_recogniti | 1k83A   | 267 |
| YNL192W | CHS1    | 3 | unassigned     | na      | 79  |
| YNL192W | CHS1    | 4 | fold_recogniti | 1dioA   | 237 |
| YNL192W | CHS1    | 5 | fold_recogniti | 1dioA   | 130 |
| YNL192W | CHS1    | 6 | unassigned     | na      | 53  |
| YNL192W | CHS1    | 7 | msa            | na      | 223 |
| YNL193W | YNL193W | 1 | unassigned     | na      | 558 |
| YNL194C | YNL194C | 1 | unassigned     | na      | 301 |

|         |         |   |                |         |     |
|---------|---------|---|----------------|---------|-----|
| YNL195C | YNL195C | 1 | msa            | na      | 148 |
| YNL195C | YNL195C | 2 | unassigned     | na      | 95  |
| YNL196C | YNL196C | 1 | unassigned     | na      | 298 |
| YNL197C | WHI3    | 1 | unassigned     | na      | 99  |
| YNL197C | WHI3    | 2 | fold_recogniti | 1k83A   | 405 |
| YNL197C | WHI3    | 3 | psiblast       | 1cvjA_  | 157 |
| YNL198C | YNL198C | 1 | unassigned     | na      | 100 |
| YNL199C | GCR2    | 1 | msa            | na      | 157 |
| YNL199C | GCR2    | 2 | unassigned     | na      | 80  |
| YNL199C | GCR2    | 3 | msa            | na      | 81  |
| YNL199C | GCR2    | 4 | unassigned     | na      | 216 |
| YNL200C | YNL200C | 1 | psiblast       | 1jztA_  | 246 |
| YNL201C | PSY2    | 1 | fold_recogniti | 1i2hA   | 162 |
| YNL201C | PSY2    | 2 | unassigned     | na      | 79  |
| YNL201C | PSY2    | 3 | msa            | na      | 293 |
| YNL201C | PSY2    | 4 | unassigned     | na      | 65  |
| YNL201C | PSY2    | 5 | msa            | na      | 119 |
| YNL201C | PSY2    | 6 | unassigned     | na      | 140 |
| YNL202W | SPS19   | 1 | psiblast       | 1gcoA_  | 295 |
| YNL203C | YNL203C | 1 | unassigned     | na      | 203 |
| YNL204C | SPS18   | 1 | psiblast       | 1dcqA_  | 164 |
| YNL204C | SPS18   | 2 | unassigned     | na      | 65  |
| YNL204C | SPS18   | 3 | msa            | na      | 71  |
| YNL205C | YNL205C | 1 | unassigned     | na      | 140 |
| YNL206C | RTT106  | 1 | unassigned     | na      | 215 |
| YNL206C | RTT106  | 2 | fold_recogniti | 1I8mA   | 113 |
| YNL206C | RTT106  | 3 | fold_recogniti | 1I8mA   | 79  |
| YNL206C | RTT106  | 4 | fold_recogniti | 1I8mA   | 48  |
| YNL207W | RIO2    | 1 | msa            | na      | 67  |
| YNL207W | RIO2    | 2 | psiblast       | 1jnk__  | 358 |
| YNL208W | YNL208W | 1 | unassigned     | na      | 204 |
| YNL209W | SSB2    | 1 | psiblast       | 1hx1A_  | 196 |
| YNL209W | SSB2    | 2 | psiblast       | 1hx1A_  | 116 |
| YNL209W | SSB2    | 3 | psiblast       | 1hx1A_  | 75  |
| YNL209W | SSB2    | 4 | psiblast       | 1ckrA_  | 160 |
| YNL209W | SSB2    | 5 | psiblast       | 1i84S_  | 66  |
| YNL210W | MER1    | 1 | unassigned     | na      | 180 |
| YNL210W | MER1    | 2 | pfam           | PF00013 | 90  |
| YNL211C | YNL211C | 1 | unassigned     | na      | 86  |
| YNL212W | VID27   | 1 | unassigned     | na      | 364 |
| YNL212W | VID27   | 2 | fold_recogniti | 1a0rB   | 318 |
| YNL212W | VID27   | 3 | fold_recogniti | 1jjuB   | 100 |
| YNL213C | YNL213C | 1 | msa            | na      | 148 |
| YNL213C | YNL213C | 2 | unassigned     | na      | 66  |
| YNL214W | PEX17   | 1 | unassigned     | na      | 199 |
| YNL215W | IES2    | 1 | fold_recogniti | 1I8mA   | 93  |
| YNL215W | IES2    | 2 | fold_recogniti | 1I8mA   | 73  |
| YNL215W | IES2    | 3 | fold_recogniti | 1I8mA   | 80  |

|         |         |   |                |         |     |
|---------|---------|---|----------------|---------|-----|
| YNL215W | IES2    | 4 | fold_recogniti | 1I8mA   | 74  |
| YNL216W | RAP1    | 1 | unassigned     | na      | 103 |
| YNL216W | RAP1    | 2 | fold_recogniti | 1imoA   | 166 |
| YNL216W | RAP1    | 3 | unassigned     | na      | 71  |
| YNL216W | RAP1    | 4 | psiblast       | 1ignA_  | 133 |
| YNL216W | RAP1    | 5 | psiblast       | 1ignA_  | 143 |
| YNL216W | RAP1    | 6 | unassigned     | na      | 211 |
| YNL217W | YNL217W | 1 | psiblast       | 1auiA_  | 326 |
| YNL218W | MGS1    | 1 | unassigned     | na      | 110 |
| YNL218W | MGS1    | 2 | psiblast       | 1iqpA_  | 99  |
| YNL218W | MGS1    | 3 | psiblast       | 1iqpA_  | 299 |
| YNL218W | MGS1    | 4 | msa            | na      | 79  |
| YNL219C | ALG9    | 1 | msa            | na      | 412 |
| YNL219C | ALG9    | 2 | unassigned     | na      | 143 |
| YNL220W | ADE12   | 1 | psiblast       | 1j4bA_  | 141 |
| YNL220W | ADE12   | 2 | psiblast       | 1j4bA_  | 217 |
| YNL220W | ADE12   | 3 | psiblast       | 1j4bA_  | 75  |
| YNL221C | POP1    | 1 | msa            | na      | 125 |
| YNL221C | POP1    | 2 | unassigned     | na      | 228 |
| YNL221C | POP1    | 3 | msa            | na      | 447 |
| YNL221C | POP1    | 4 | unassigned     | na      | 75  |
| YNL222W | SSU72   | 1 | msa            | na      | 206 |
| YNL223W | ATG4    | 1 | unassigned     | na      | 122 |
| YNL223W | ATG4    | 2 | pfam           | PF03416 | 323 |
| YNL223W | ATG4    | 3 | unassigned     | na      | 61  |
| YNL224C | YNL224C | 1 | msa            | na      | 307 |
| YNL224C | YNL224C | 2 | unassigned     | na      | 64  |
| YNL224C | YNL224C | 3 | msa            | na      | 347 |
| YNL224C | YNL224C | 4 | pfam           | PF01585 | 49  |
| YNL225C | CNM67   | 1 | psiblast       | 1i84S_  | 357 |
| YNL225C | CNM67   | 2 | psiblast       | 1c1gA_  | 107 |
| YNL225C | CNM67   | 3 | msa            | na      | 117 |
| YNL226W | YNL226W | 1 | unassigned     | na      | 136 |
| YNL227C | JJJ1    | 1 | psiblast       | 1xbl__  | 119 |
| YNL227C | JJJ1    | 2 | psiblast       | 1exkA_  | 137 |
| YNL227C | JJJ1    | 3 | psiblast       | 1i84S_  | 334 |
| YNL228W | YNL228W | 1 | unassigned     | na      | 258 |
| YNL229C | URE2    | 1 | msa            | na      | 91  |
| YNL229C | URE2    | 2 | psiblast       | 1g6wA_  | 116 |
| YNL229C | URE2    | 3 | psiblast       | 1g6wA_  | 147 |
| YNL230C | ELA1    | 1 | msa            | na      | 177 |
| YNL230C | ELA1    | 2 | unassigned     | na      | 202 |
| YNL231C | PDR16   | 1 | psiblast       | 1aua__  | 296 |
| YNL231C | PDR16   | 2 | psiblast       | 1aua__  | 55  |
| YNL232W | CSL4    | 1 | fold_recogniti | 1e3hA   | 292 |
| YNL233W | BNI4    | 1 | unassigned     | na      | 892 |
| YNL234W | YNL234W | 1 | unassigned     | na      | 155 |
| YNL234W | YNL234W | 2 | psiblast       | 1abwA_  | 210 |

|         |         |    |                |         |      |
|---------|---------|----|----------------|---------|------|
| YNL234W | YNL234W | 3  | unassigned     | na      | 61   |
| YNL235C | YNL235C | 1  | unassigned     | na      | 143  |
| YNL236W | SIN4    | 1  | unassigned     | na      | 457  |
| YNL236W | SIN4    | 2  | fold_recogniti | 1qoyA   | 269  |
| YNL236W | SIN4    | 3  | fold_recogniti | 1qoyA   | 47   |
| YNL236W | SIN4    | 4  | unassigned     | na      | 201  |
| YNL237W | YTP1    | 1  | unassigned     | na      | 118  |
| YNL237W | YTP1    | 2  | msa            | na      | 341  |
| YNL238W | KEX2    | 1  | psiblast       | 1kn6A_  | 126  |
| YNL238W | KEX2    | 2  | psiblast       | 1meeA_  | 339  |
| YNL238W | KEX2    | 3  | msa            | na      | 146  |
| YNL238W | KEX2    | 4  | unassigned     | na      | 203  |
| YNL239W | LAP3    | 1  | psiblast       | 1gcb__  | 248  |
| YNL239W | LAP3    | 2  | psiblast       | 1gcb__  | 206  |
| YNL240C | NAR1    | 1  | psiblast       | 1c4aA_  | 491  |
| YNL241C | ZWF1    | 1  | psiblast       | 1qkiA_  | 202  |
| YNL241C | ZWF1    | 2  | psiblast       | 1qkiA_  | 303  |
| YNL242W | ATG2    | 1  | unassigned     | na      | 1209 |
| YNL242W | ATG2    | 2  | msa            | na      | 383  |
| YNL243W | SLA2    | 1  | psiblast       | 1i84S_  | 311  |
| YNL243W | SLA2    | 2  | psiblast       | 1c1gA_  | 69   |
| YNL243W | SLA2    | 3  | psiblast       | 1c1gA_  | 202  |
| YNL243W | SLA2    | 4  | fold_recogniti | 1hciA   | 149  |
| YNL243W | SLA2    | 5  | fold_recogniti | 1hciA   | 113  |
| YNL243W | SLA2    | 6  | fold_recogniti | 1hciA   | 124  |
| YNL244C | SUI1    | 1  | psiblast       | 2if1__  | 108  |
| YNL245C | CWC25   | 1  | unassigned     | na      | 179  |
| YNL246W | VPS75   | 1  | pfam           | PF00956 | 264  |
| YNL247W | YNL247W | 1  | psiblast       | 1lleA_  | 153  |
| YNL247W | YNL247W | 2  | psiblast       | 1li5A_  | 266  |
| YNL247W | YNL247W | 3  | psiblast       | 1li5A_  | 55   |
| YNL247W | YNL247W | 4  | psiblast       | 1li5A_  | 190  |
| YNL247W | YNL247W | 5  | unassigned     | na      | 103  |
| YNL248C | RPA49   | 1  | unassigned     | na      | 415  |
| YNL249C | MPA43   | 1  | psiblast       | 1bo5O_  | 264  |
| YNL249C | MPA43   | 2  | psiblast       | 1bo5O_  | 80   |
| YNL249C | MPA43   | 3  | psiblast       | 1bo5O_  | 198  |
| YNL250W | RAD50   | 1  | psiblast       | 1f2tA_  | 56   |
| YNL250W | RAD50   | 2  | psiblast       | 1i84S_  | 348  |
| YNL250W | RAD50   | 3  | unassigned     | na      | 97   |
| YNL250W | RAD50   | 4  | psiblast       | 2tmaA_  | 109  |
| YNL250W | RAD50   | 5  | psiblast       | 2tmaA_  | 80   |
| YNL250W | RAD50   | 6  | psiblast       | 2tmaA_  | 62   |
| YNL250W | RAD50   | 7  | psiblast       | 2tmaA_  | 76   |
| YNL250W | RAD50   | 8  | msa            | na      | 307  |
| YNL250W | RAD50   | 9  | psiblast       | 1f2tB_  | 94   |
| YNL250W | RAD50   | 10 | psiblast       | 1f2tB_  | 83   |
| YNL251C | NRD1    | 1  | msa            | na      | 200  |

|         |         |   |                |         |     |
|---------|---------|---|----------------|---------|-----|
| YNL251C | NRD1    | 2 | psiblast       | 2up1A_  | 101 |
| YNL251C | NRD1    | 3 | psiblast       | 2up1A_  | 112 |
| YNL251C | NRD1    | 4 | psiblast       | 1fxIA_  | 95  |
| YNL251C | NRD1    | 5 | unassigned     | na      | 67  |
| YNL252C | MRPL17  | 1 | unassigned     | na      | 143 |
| YNL252C | MRPL17  | 2 | fold_recogniti | 1kt9A   | 138 |
| YNL253W | TEX1    | 1 | psiblast       | 1gg2B_  | 323 |
| YNL253W | TEX1    | 2 | psiblast       | 1k8kC_  | 99  |
| YNL254C | YNL254C | 1 | unassigned     | na      | 401 |
| YNL255C | GIS2    | 1 | psiblast       | 1baj__  | 52  |
| YNL255C | GIS2    | 2 | psiblast       | 1aaf__  | 101 |
| YNL256W | FOL1    | 1 | psiblast       | 1dhn__  | 220 |
| YNL256W | FOL1    | 2 | unassigned     | na      | 98  |
| YNL256W | FOL1    | 3 | psiblast       | 1dy3A_  | 196 |
| YNL256W | FOL1    | 4 | psiblast       | 1aj0__  | 179 |
| YNL256W | FOL1    | 5 | psiblast       | 1aj0__  | 171 |
| YNL257C | SIP3    | 1 | fold_recogniti | 1hciA   | 162 |
| YNL257C | SIP3    | 2 | fold_recogniti | 1hciA   | 133 |
| YNL257C | SIP3    | 3 | psiblast       | 1fhwA_  | 119 |
| YNL257C | SIP3    | 4 | psiblast       | 1f7cA_  | 130 |
| YNL257C | SIP3    | 5 | unassigned     | na      | 685 |
| YNL258C | DSL1    | 1 | unassigned     | na      | 754 |
| YNL259C | ATX1    | 1 | psiblast       | 1cc7A_  | 73  |
| YNL260C | YNL260C | 1 | unassigned     | na      | 198 |
| YNL261W | ORC5    | 1 | psiblast       | 1e32A_  | 191 |
| YNL261W | ORC5    | 2 | psiblast       | 1e32A_  | 163 |
| YNL261W | ORC5    | 3 | unassigned     | na      | 125 |
| YNL262W | POL2    | 1 | unassigned     | na      | 100 |
| YNL262W | POL2    | 2 | psiblast       | 1tgoA_  | 325 |
| YNL262W | POL2    | 3 | psiblast       | 1tgoA_  | 234 |
| YNL262W | POL2    | 4 | psiblast       | 1tgoA_  | 198 |
| YNL262W | POL2    | 5 | psiblast       | 1b1fR_  | 241 |
| YNL262W | POL2    | 6 | msa            | na      | 134 |
| YNL262W | POL2    | 7 | unassigned     | na      | 692 |
| YNL262W | POL2    | 8 | msa            | na      | 298 |
| YNL263C | YIF1    | 1 | pfam           | PF03878 | 314 |
| YNL264C | PDR17   | 1 | psiblast       | 1aua__  | 117 |
| YNL264C | PDR17   | 2 | psiblast       | 1aua__  | 233 |
| YNL265C | IST1    | 1 | pfam           | PF03398 | 151 |
| YNL265C | IST1    | 2 | msa            | na      | 81  |
| YNL265C | IST1    | 3 | unassigned     | na      | 66  |
| YNL266W | YNL266W | 1 | unassigned     | na      | 139 |
| YNL267W | PIK1    | 1 | msa            | na      | 121 |
| YNL267W | PIK1    | 2 | msa            | na      | 313 |
| YNL267W | PIK1    | 3 | psiblast       | 1e8yA_  | 258 |
| YNL267W | PIK1    | 4 | psiblast       | 1e8yA_  | 185 |
| YNL267W | PIK1    | 5 | psiblast       | 1e8yA_  | 189 |
| YNL268W | LYP1    | 1 | unassigned     | na      | 84  |

|         |         |   |                |         |     |
|---------|---------|---|----------------|---------|-----|
| YNL268W | LYP1    | 2 | pfam           | PF00324 | 527 |
| YNL269W | BSC4    | 1 | unassigned     | na      | 131 |
| YNL270C | ALP1    | 1 | pfam           | PF00324 | 573 |
| YNL271C | BNI1    | 1 | psiblast       | 1i84S_  | 444 |
| YNL271C | BNI1    | 2 | psiblast       | 1almA_  | 67  |
| YNL271C | BNI1    | 3 | psiblast       | 1cii__  | 162 |
| YNL271C | BNI1    | 4 | psiblast       | 1cii__  | 275 |
| YNL271C | BNI1    | 5 | unassigned     | na      | 63  |
| YNL271C | BNI1    | 6 | msa            | na      | 196 |
| YNL271C | BNI1    | 7 | msa            | na      | 618 |
| YNL271C | BNI1    | 8 | unassigned     | na      | 128 |
| YNL272C | SEC2    | 1 | psiblast       | 1i84S_  | 302 |
| YNL272C | SEC2    | 2 | unassigned     | na      | 154 |
| YNL272C | SEC2    | 3 | msa            | na      | 303 |
| YNL273W | TOF1    | 1 | msa            | na      | 639 |
| YNL273W | TOF1    | 2 | msa            | na      | 223 |
| YNL273W | TOF1    | 3 | unassigned     | na      | 376 |
| YNL274C | YNL274C | 1 | psiblast       | 1gdhA_  | 159 |
| YNL274C | YNL274C | 2 | psiblast       | 1gdhA_  | 191 |
| YNL275W | YNL275W | 1 | psiblast       | 1bzkA_  | 163 |
| YNL275W | YNL275W | 2 | msa            | na      | 413 |
| YNL276C | YNL276C | 1 | unassigned     | na      | 131 |
| YNL277W | MET2    | 1 | psiblast       | 1azwA_  | 357 |
| YNL277W | MET2    | 2 | fold_recogniti | 1iunA   | 129 |
| YNL278W | CAF120  | 1 | unassigned     | na      | 75  |
| YNL278W | CAF120  | 2 | pfam           | PF00169 | 157 |
| YNL278W | CAF120  | 3 | unassigned     | na      | 99  |
| YNL278W | CAF120  | 4 | msa            | na      | 729 |
| YNL279W | PRM1    | 1 | unassigned     | na      | 661 |
| YNL280C | ERG24   | 1 | pfam           | PF01222 | 438 |
| YNL281W | HCH1    | 1 | unassigned     | na      | 153 |
| YNL282W | POP3    | 1 | unassigned     | na      | 195 |
| YNL283C | WSC2    | 1 | pfam           | PF01822 | 108 |
| YNL283C | WSC2    | 2 | unassigned     | na      | 80  |
| YNL283C | WSC2    | 3 | fold_recogniti | 1ei3A   | 315 |
| YNL284C | MRPL10  | 1 | psiblast       | 1lnrJ_  | 117 |
| YNL284C | MRPL10  | 2 | psiblast       | 1lnrJ_  | 117 |
| YNL284C | MRPL10  | 3 | unassigned     | na      | 88  |
| YNL285W | YNL285W | 1 | unassigned     | na      | 123 |
| YNL286W | CUS2    | 1 | psiblast       | 1cvjA_  | 130 |
| YNL286W | CUS2    | 2 | psiblast       | 1cvjA_  | 155 |
| YNL287W | SEC21   | 1 | psiblast       | 1gw5B_  | 105 |
| YNL287W | SEC21   | 2 | psiblast       | 1gw5B_  | 108 |
| YNL287W | SEC21   | 3 | psiblast       | 1gw5B_  | 216 |
| YNL287W | SEC21   | 4 | psiblast       | 1gw5B_  | 94  |
| YNL287W | SEC21   | 5 | psiblast       | 1gw5B_  | 127 |
| YNL287W | SEC21   | 6 | msa            | na      | 99  |
| YNL287W | SEC21   | 7 | msa            | na      | 186 |

|         |         |   |                |         |      |
|---------|---------|---|----------------|---------|------|
| YNL288W | CAF40   | 1 | unassigned     | na      | 76   |
| YNL288W | CAF40   | 2 | fold_recogniti | 1ee5A   | 203  |
| YNL288W | CAF40   | 3 | fold_recogniti | 1ee5A   | 94   |
| YNL289W | PCL1    | 1 | psiblast       | 1vin__  | 150  |
| YNL289W | PCL1    | 2 | psiblast       | 1vin__  | 129  |
| YNL290W | RFC3    | 1 | psiblast       | 1lfsA_  | 89   |
| YNL290W | RFC3    | 2 | psiblast       | 1lfsA_  | 251  |
| YNL291C | MID1    | 1 | msa            | na      | 245  |
| YNL291C | MID1    | 2 | unassigned     | na      | 303  |
| YNL292W | PUS4    | 1 | psiblast       | 1k8wA_  | 282  |
| YNL292W | PUS4    | 2 | psiblast       | 1k8wA_  | 121  |
| YNL293W | MSB3    | 1 | unassigned     | na      | 131  |
| YNL293W | MSB3    | 2 | psiblast       | 1fkmA_  | 244  |
| YNL293W | MSB3    | 3 | psiblast       | 1fkmA_  | 83   |
| YNL293W | MSB3    | 4 | unassigned     | na      | 67   |
| YNL293W | MSB3    | 5 | msa            | na      | 108  |
| YNL294C | RIM21   | 1 | unassigned     | na      | 64   |
| YNL294C | RIM21   | 2 | msa            | na      | 312  |
| YNL294C | RIM21   | 3 | unassigned     | na      | 157  |
| YNL295W | YNL295W | 1 | unassigned     | na      | 524  |
| YNL296W | YNL296W | 1 | unassigned     | na      | 104  |
| YNL297C | MON2    | 1 | msa            | na      | 220  |
| YNL297C | MON2    | 2 | unassigned     | na      | 106  |
| YNL297C | MON2    | 3 | msa            | na      | 1067 |
| YNL297C | MON2    | 4 | unassigned     | na      | 243  |
| YNL298W | CLA4    | 1 | fold_recogniti | 1faoA   | 177  |
| YNL298W | CLA4    | 2 | psiblast       | 1f3mA_  | 81   |
| YNL298W | CLA4    | 3 | fold_recogniti | 1deqA   | 203  |
| YNL298W | CLA4    | 4 | psiblast       | 1f3mC_  | 181  |
| YNL298W | CLA4    | 5 | psiblast       | 1f3mC_  | 200  |
| YNL299W | TRF5    | 1 | unassigned     | na      | 122  |
| YNL299W | TRF5    | 2 | psiblast       | 1f5aA_  | 269  |
| YNL299W | TRF5    | 3 | psiblast       | 1f5aA_  | 111  |
| YNL299W | TRF5    | 4 | unassigned     | na      | 123  |
| YNL300W | YNL300W | 1 | unassigned     | na      | 102  |
| YNL301C | RPL18B  | 1 | psiblast       | 1k5yO_  | 186  |
| YNL302C | RPS19B  | 1 | pfam           | PF01090 | 144  |
| YNL303W | YNL303W | 1 | unassigned     | na      | 115  |
| YNL304W | YPT11   | 1 | unassigned     | na      | 97   |
| YNL304W | YPT11   | 2 | psiblast       | 1d5cA_  | 258  |
| YNL305C | YNL305C | 1 | pfam           | PF01027 | 297  |
| YNL306W | MRPS18  | 1 | unassigned     | na      | 93   |
| YNL306W | MRPS18  | 2 | psiblast       | 1i1uK_  | 124  |
| YNL307C | MCK1    | 1 | psiblast       | 1i09A_  | 117  |
| YNL307C | MCK1    | 2 | psiblast       | 1i09A_  | 258  |
| YNL308C | KRI1    | 1 | unassigned     | na      | 121  |
| YNL308C | KRI1    | 2 | msa            | na      | 470  |
| YNL309W | STB1    | 1 | fold_recogniti | 1l8mA   | 95   |

|         |         |   |                |         |     |
|---------|---------|---|----------------|---------|-----|
| YNL309W | STB1    | 2 | fold_recogniti | 1k83A   | 364 |
| YNL310C | FMP28   | 1 | unassigned     | na      | 55  |
| YNL310C | FMP28   | 2 | msa            | na      | 150 |
| YNL311C | YNL311C | 1 | pfam           | PF00646 | 128 |
| YNL311C | YNL311C | 2 | unassigned     | na      | 635 |
| YNL312W | RFA2    | 1 | psiblast       | 1quqA_  | 178 |
| YNL312W | RFA2    | 2 | psiblast       | 1dpuA_  | 95  |
| YNL313C | YNL313C | 1 | unassigned     | na      | 105 |
| YNL313C | YNL313C | 2 | msa            | na      | 380 |
| YNL313C | YNL313C | 3 | psiblast       | 1b89A_  | 78  |
| YNL313C | YNL313C | 4 | psiblast       | 1fchA_  | 122 |
| YNL313C | YNL313C | 5 | psiblast       | 1fchA_  | 75  |
| YNL313C | YNL313C | 6 | psiblast       | 1fchA_  | 72  |
| YNL313C | YNL313C | 7 | psiblast       | 1fchA_  | 72  |
| YNL314W | DAL82   | 1 | unassigned     | na      | 255 |
| YNL315C | ATP11   | 1 | unassigned     | na      | 87  |
| YNL315C | ATP11   | 2 | msa            | na      | 231 |
| YNL316C | PHA2    | 1 | psiblast       | 1ecmA_  | 45  |
| YNL316C | PHA2    | 2 | pfam           | PF00800 | 215 |
| YNL316C | PHA2    | 3 | psiblast       | 1in9A_  | 108 |
| YNL317W | PFS2    | 1 | psiblast       | 1gg2B_  | 333 |
| YNL317W | PFS2    | 2 | fold_recogniti | 1scgB   | 132 |
| YNL318C | HXT14   | 1 | psiblast       | 1ja5A_  | 481 |
| YNL318C | HXT14   | 2 | psiblast       | 1ja5A_  | 59  |
| YNL319W | YNL319W | 1 | unassigned     | na      | 146 |
| YNL320W | YNL320W | 1 | psiblast       | 1qfsA_  | 284 |
| YNL321W | YNL321W | 1 | unassigned     | na      | 178 |
| YNL321W | YNL321W | 2 | pfam           | PF03733 | 148 |
| YNL321W | YNL321W | 3 | unassigned     | na      | 138 |
| YNL321W | YNL321W | 4 | msa            | na      | 444 |
| YNL322C | KRE1    | 1 | fold_recogniti | 1ei3A   | 313 |
| YNL323W | LEM3    | 1 | unassigned     | na      | 78  |
| YNL323W | LEM3    | 2 | pfam           | PF03381 | 336 |
| YNL324W | YNL324W | 1 | unassigned     | na      | 131 |
| YNL325C | FIG4    | 1 | unassigned     | na      | 95  |
| YNL325C | FIG4    | 2 | pfam           | PF02383 | 335 |
| YNL325C | FIG4    | 3 | msa            | na      | 163 |
| YNL325C | FIG4    | 4 | unassigned     | na      | 286 |
| YNL326C | YNL326C | 1 | unassigned     | na      | 82  |
| YNL326C | YNL326C | 2 | pfam           | PF01529 | 96  |
| YNL326C | YNL326C | 3 | msa            | na      | 158 |
| YNL327W | EGT2    | 1 | msa            | na      | 412 |
| YNL327W | EGT2    | 2 | msa            | na      | 629 |
| YNL328C | MDJ2    | 1 | unassigned     | na      | 82  |
| YNL328C | MDJ2    | 2 | psiblast       | 1hdj__  | 64  |
| YNL329C | PEX6    | 1 | unassigned     | na      | 190 |
| YNL329C | PEX6    | 2 | psiblast       | 1e32A_  | 115 |
| YNL329C | PEX6    | 3 | psiblast       | 1e32A_  | 132 |



|           |           |   |                |         |     |
|-----------|-----------|---|----------------|---------|-----|
| YNL329C   | PEX6      | 4 | psiblast       | 1e32A_  | 181 |
| YNL329C   | PEX6      | 5 | psiblast       | 1e32A_  | 89  |
| YNL329C   | PEX6      | 6 | psiblast       | 1iqpA_  | 58  |
| YNL329C   | PEX6      | 7 | psiblast       | 1d2nA_  | 118 |
| YNL329C   | PEX6      | 8 | fold_recogniti | 1lv7A   | 147 |
| YNL330C   | RPD3      | 1 | psiblast       | 1c3rA_  | 177 |
| YNL330C   | RPD3      | 2 | psiblast       | 1c3rA_  | 170 |
| YNL330C   | RPD3      | 3 | unassigned     | na      | 86  |
| YNL331C   | AAD14     | 1 | psiblast       | 1exbA_  | 285 |
| YNL331C   | AAD14     | 2 | psiblast       | 1exbA_  | 91  |
| YNL332W   | THI12     | 1 | psiblast       | 1gggA_  | 188 |
| YNL332W   | THI12     | 2 | psiblast       | 1gggA_  | 98  |
| YNL332W   | THI12     | 3 | unassigned     | na      | 54  |
| YNL333W   | SNZ2      | 1 | fold_recogniti | 1gt8A   | 190 |
| YNL333W   | SNZ2      | 2 | psiblast       | 2tpsA_  | 108 |
| YNL334C   | SNO2      | 1 | psiblast       | 1gpmA_  | 222 |
| YNL336W   | COS1      | 1 | msa            | na      | 61  |
| YNL336W   | COS1      | 2 | pfam           | PF00674 | 110 |
| YNL336W   | COS1      | 3 | unassigned     | na      | 70  |
| YNL336W   | COS1      | 4 | pfam           | PF00674 | 140 |
| YNL337W   | YNL337W   | 1 | unassigned     | na      | 84  |
| YNL338W   | YNL338W   | 1 | unassigned     | na      | 52  |
| YNL339C   | YRF1-6    | 1 | msa            | na      | 206 |
| YNL339C   | YRF1-6    | 2 | fold_recogniti | 1mukA   | 594 |
| YNL339C   | YRF1-6    | 3 | psiblast       | 1fuuA_  | 456 |
| YNL339C   | YRF1-6    | 4 | unassigned     | na      | 55  |
| YNL339C   | YRF1-6    | 5 | psiblast       | 1dnnB_  | 187 |
| YNL339C   | YRF1-6    | 6 | unassigned     | na      | 361 |
| YNR001C   | CIT1      | 1 | psiblast       | 1cts__  | 375 |
| YNR001C   | CIT1      | 2 | psiblast       | 1cts__  | 104 |
| YNR001W-A | YNR001W-A | 1 | unassigned     | na      | 72  |
| YNR002C   | FUN34     | 1 | pfam           | PF01184 | 282 |
| YNR003C   | RPC34     | 1 | msa            | na      | 193 |
| YNR003C   | RPC34     | 2 | unassigned     | na      | 124 |
| YNR004W   | YNR004W   | 1 | unassigned     | na      | 146 |
| YNR005C   | YNR005C   | 1 | unassigned     | na      | 134 |
| YNR006W   | VPS27     | 1 | fold_recogniti | 1hf8A   | 146 |
| YNR006W   | VPS27     | 2 | psiblast       | 1vfyA_  | 97  |
| YNR006W   | VPS27     | 3 | unassigned     | na      | 113 |
| YNR006W   | VPS27     | 4 | fold_recogniti | 1ldvA   | 266 |
| YNR007C   | ATG3      | 1 | unassigned     | na      | 141 |
| YNR007C   | ATG3      | 2 | msa            | na      | 169 |
| YNR008W   | LRO1      | 1 | unassigned     | na      | 125 |
| YNR008W   | LRO1      | 2 | msa            | na      | 96  |
| YNR008W   | LRO1      | 3 | fold_recogniti | 1ex9A   | 171 |
| YNR008W   | LRO1      | 4 | msa            | na      | 210 |
| YNR008W   | LRO1      | 5 | unassigned     | na      | 59  |
| YNR009W   | YNR009W   | 1 | unassigned     | na      | 249 |

|         |         |    |            |         |     |
|---------|---------|----|------------|---------|-----|
| YNR010W | CSE2    | 1  | unassigned | na      | 149 |
| YNR011C | PRP2    | 1  | msa        | na      | 165 |
| YNR011C | PRP2    | 2  | psiblast   | 1fuuA_  | 435 |
| YNR011C | PRP2    | 3  | msa        | na      | 97  |
| YNR011C | PRP2    | 4  | msa        | na      | 179 |
| YNR012W | URK1    | 1  | psiblast   | 1esmA_  | 279 |
| YNR012W | URK1    | 2  | psiblast   | 1bd3D_  | 222 |
| YNR013C | PHO91   | 1  | pfam       | PF03105 | 312 |
| YNR013C | PHO91   | 2  | unassigned | na      | 90  |
| YNR013C | PHO91   | 3  | pfam       | PF00939 | 492 |
| YNR014W | YNR014W | 1  | unassigned | na      | 212 |
| YNR015W | SMM1    | 1  | psiblast   | 1gt8A_  | 305 |
| YNR015W | SMM1    | 2  | psiblast   | 1gt8A_  | 79  |
| YNR016C | ACC1    | 1  | psiblast   | 1bncA_  | 174 |
| YNR016C | ACC1    | 2  | psiblast   | 1bncA_  | 174 |
| YNR016C | ACC1    | 3  | psiblast   | 1bncA_  | 255 |
| YNR016C | ACC1    | 4  | unassigned | na      | 92  |
| YNR016C | ACC1    | 5  | psiblast   | 1dczA_  | 86  |
| YNR016C | ACC1    | 6  | unassigned | na      | 208 |
| YNR016C | ACC1    | 7  | msa        | na      | 102 |
| YNR016C | ACC1    | 8  | unassigned | na      | 63  |
| YNR016C | ACC1    | 9  | msa        | na      | 174 |
| YNR016C | ACC1    | 10 | msa        | na      | 199 |
| YNR016C | ACC1    | 11 | msa        | na      | 619 |
| YNR016C | ACC1    | 12 | unassigned | na      | 87  |
| YNR017W | MAS6    | 1  | msa        | na      | 222 |
| YNR018W | YNR018W | 1  | msa        | na      | 224 |
| YNR019W | ARE2    | 1  | unassigned | na      | 133 |
| YNR019W | ARE2    | 2  | msa        | na      | 185 |
| YNR019W | ARE2    | 3  | unassigned | na      | 79  |
| YNR019W | ARE2    | 4  | pfam       | PF01800 | 245 |
| YNR020C | YNR020C | 1  | unassigned | na      | 66  |
| YNR020C | YNR020C | 2  | msa        | na      | 204 |
| YNR021W | YNR021W | 1  | msa        | na      | 322 |
| YNR021W | YNR021W | 2  | msa        | na      | 82  |
| YNR022C | MRPL50  | 1  | unassigned | na      | 139 |
| YNR023W | SNF12   | 1  | msa        | na      | 204 |
| YNR023W | SNF12   | 2  | unassigned | na      | 59  |
| YNR023W | SNF12   | 3  | msa        | na      | 303 |
| YNR024W | YNR024W | 1  | unassigned | na      | 186 |
| YNR025C | YNR025C | 1  | unassigned | na      | 119 |
| YNR026C | SEC12   | 1  | psiblast   | 1gg2B_  | 337 |
| YNR026C | SEC12   | 2  | psiblast   | 1gxrA_  | 134 |
| YNR027W | BUD17   | 1  | psiblast   | 1lljA_  | 317 |
| YNR028W | CPR8    | 1  | psiblast   | 1cynA_  | 253 |
| YNR028W | CPR8    | 2  | unassigned | na      | 55  |
| YNR029C | YNR029C | 1  | unassigned | na      | 65  |
| YNR029C | YNR029C | 2  | psiblast   | 2ffhA_  | 250 |

|           |           |   |                |         |     |
|-----------|-----------|---|----------------|---------|-----|
| YNR029C   | YNR029C   | 3 | msa            | na      | 114 |
| YNR030W   | ECM39     | 1 | msa            | na      | 407 |
| YNR030W   | ECM39     | 2 | unassigned     | na      | 144 |
| YNR031C   | SSK2      | 1 | unassigned     | na      | 560 |
| YNR031C   | SSK2      | 2 | msa            | na      | 326 |
| YNR031C   | SSK2      | 3 | unassigned     | na      | 237 |
| YNR031C   | SSK2      | 4 | psiblast       | 1gxcA_  | 133 |
| YNR031C   | SSK2      | 5 | psiblast       | 1f3mC_  | 90  |
| YNR031C   | SSK2      | 6 | psiblast       | 1f3mC_  | 233 |
| YNR032C-A | HUB1      | 1 | psiblast       | 1ud7A_  | 73  |
| YNR032W   | PPG1      | 1 | psiblast       | 1fjmA_  | 368 |
| YNR033W   | ABZ1      | 1 | psiblast       | 1qdIB_  | 249 |
| YNR033W   | ABZ1      | 2 | psiblast       | 1k0eA_  | 538 |
| YNR034W   | SOL1      | 1 | psiblast       | 1d9tA_  | 321 |
| YNR034W-A | YNR034W-A | 1 | unassigned     | na      | 98  |
| YNR035C   | ARC35     | 1 | psiblast       | 1k8kD_  | 128 |
| YNR035C   | ARC35     | 2 | psiblast       | 1k8kD_  | 214 |
| YNR036C   | YNR036C   | 1 | psiblast       | 1l1uL_  | 153 |
| YNR037C   | RSM19     | 1 | psiblast       | 1fjgS_  | 91  |
| YNR038W   | DBP6      | 1 | msa            | na      | 169 |
| YNR038W   | DBP6      | 2 | psiblast       | 1hv8A_  | 241 |
| YNR038W   | DBP6      | 3 | psiblast       | 1hv8A_  | 219 |
| YNR039C   | ZRG17     | 1 | unassigned     | na      | 137 |
| YNR039C   | ZRG17     | 2 | msa            | na      | 219 |
| YNR039C   | ZRG17     | 3 | unassigned     | na      | 249 |
| YNR040W   | YNR040W   | 1 | unassigned     | na      | 256 |
| YNR041C   | COQ2      | 1 | unassigned     | na      | 94  |
| YNR041C   | COQ2      | 2 | pfam           | PF01040 | 278 |
| YNR042W   | YNR042W   | 1 | unassigned     | na      | 142 |
| YNR043W   | MVD1      | 1 | psiblast       | 1fi4A_  | 396 |
| YNR044W   | AGA1      | 1 | msa            | na      | 169 |
| YNR044W   | AGA1      | 2 | fold_recogniti | 1m2vB   | 74  |
| YNR044W   | AGA1      | 3 | unassigned     | na      | 76  |
| YNR044W   | AGA1      | 4 | msa            | na      | 134 |
| YNR044W   | AGA1      | 5 | fold_recogniti | 1deqA   | 149 |
| YNR044W   | AGA1      | 6 | msa            | na      | 123 |
| YNR045W   | PET494    | 1 | unassigned     | na      | 489 |
| YNR046W   | YNR046W   | 1 | pfam           | PF03966 | 135 |
| YNR047W   | YNR047W   | 1 | fold_recogniti | 1k83A   | 307 |
| YNR047W   | YNR047W   | 2 | unassigned     | na      | 119 |
| YNR047W   | YNR047W   | 3 | psiblast       | 1fotA_  | 155 |
| YNR047W   | YNR047W   | 4 | psiblast       | 1fotA_  | 233 |
| YNR047W   | YNR047W   | 5 | unassigned     | na      | 79  |
| YNR048W   | YNR048W   | 1 | pfam           | PF03381 | 393 |
| YNR049C   | MSO1      | 1 | unassigned     | na      | 210 |
| YNR050C   | LYS9      | 1 | psiblast       | 1e5IA_  | 149 |
| YNR050C   | LYS9      | 2 | psiblast       | 1e5IA_  | 206 |
| YNR050C   | LYS9      | 3 | psiblast       | 1e5IA_  | 91  |

|         |         |   |                |         |     |
|---------|---------|---|----------------|---------|-----|
| YNR051C | BRE5    | 1 | psiblast       | 1gy7A_  | 149 |
| YNR051C | BRE5    | 2 | fold_recogniti | 1m2vB   | 366 |
| YNR052C | POP2    | 1 | unassigned     | na      | 154 |
| YNR052C | POP2    | 2 | fold_recogniti | 1fxxA   | 279 |
| YNR053C | NOG2    | 1 | msa            | na      | 112 |
| YNR053C | NOG2    | 2 | psiblast       | 1jah__  | 200 |
| YNR053C | NOG2    | 3 | psiblast       | 1egaA_  | 174 |
| YNR054C | YNR054C | 1 | psiblast       | 1up1__  | 98  |
| YNR054C | YNR054C | 2 | psiblast       | 1up1__  | 99  |
| YNR054C | YNR054C | 3 | psiblast       | 1qm9A_  | 68  |
| YNR054C | YNR054C | 4 | psiblast       | 1g9IA_  | 51  |
| YNR055C | HOL1    | 1 | msa            | na      | 63  |
| YNR055C | HOL1    | 2 | psiblast       | 1lviA_  | 442 |
| YNR055C | HOL1    | 3 | unassigned     | na      | 81  |
| YNR056C | BIO5    | 1 | msa            | na      | 154 |
| YNR056C | BIO5    | 2 | unassigned     | na      | 125 |
| YNR056C | BIO5    | 3 | msa            | na      | 282 |
| YNR057C | BIO4    | 1 | psiblast       | 1m3tA_  | 237 |
| YNR058W | BIO3    | 1 | psiblast       | 1qj3A_  | 480 |
| YNR059W | MNT4    | 1 | unassigned     | na      | 181 |
| YNR059W | MNT4    | 2 | fold_recogniti | 1ga8A   | 180 |
| YNR059W | MNT4    | 3 | unassigned     | na      | 219 |
| YNR060W | FRE4    | 1 | msa            | na      | 212 |
| YNR060W | FRE4    | 2 | msa            | na      | 124 |
| YNR060W | FRE4    | 3 | unassigned     | na      | 60  |
| YNR060W | FRE4    | 4 | psiblast       | 1cnf__  | 125 |
| YNR060W | FRE4    | 5 | psiblast       | 1cnf__  | 125 |
| YNR060W | FRE4    | 6 | unassigned     | na      | 73  |
| YNR061C | YNR061C | 1 | msa            | na      | 145 |
| YNR061C | YNR061C | 2 | unassigned     | na      | 74  |
| YNR062C | YNR062C | 1 | unassigned     | na      | 327 |
| YNR063W | YNR063W | 1 | psiblast       | 1qp9A_  | 75  |
| YNR063W | YNR063W | 2 | msa            | na      | 434 |
| YNR063W | YNR063W | 3 | unassigned     | na      | 98  |
| YNR064C | YNR064C | 1 | psiblast       | 1bn6A_  | 290 |
| YNR065C | YSN1    | 1 | unassigned     | na      | 229 |
| YNR065C | YSN1    | 2 | msa            | na      | 737 |
| YNR065C | YSN1    | 3 | unassigned     | na      | 150 |
| YNR066C | YNR066C | 1 | fold_recogniti | 1mz5A   | 436 |
| YNR067C | DSE4    | 1 | msa            | na      | 407 |
| YNR067C | DSE4    | 2 | pfam           | PF03639 | 710 |
| YNR068C | YNR068C | 1 | msa            | na      | 120 |
| YNR068C | YNR068C | 2 | unassigned     | na      | 152 |
| YNR069C | BSC5    | 1 | unassigned     | na      | 489 |
| YNR070W | YNR070W | 1 | psiblast       | 1jj7A_  | 308 |
| YNR070W | YNR070W | 2 | unassigned     | na      | 59  |
| YNR070W | YNR070W | 3 | psiblast       | 1jsqA_  | 302 |
| YNR070W | YNR070W | 4 | psiblast       | 1jsqA_  | 308 |

|         |         |   |                |         |     |
|---------|---------|---|----------------|---------|-----|
| YNR070W | YNR070W | 5 | msa            | na      | 296 |
| YNR070W | YNR070W | 6 | unassigned     | na      | 60  |
| YNR071C | YNR071C | 1 | psiblast       | 1I7jA_  | 342 |
| YNR072W | HXT17   | 1 | psiblast       | 1ja5A_  | 462 |
| YNR072W | HXT17   | 2 | psiblast       | 1ja5A_  | 102 |
| YNR074C | YNR074C | 1 | psiblast       | 1ndaA_  | 233 |
| YNR074C | YNR074C | 2 | psiblast       | 1ndaA_  | 145 |
| YNR075W | COS10   | 1 | msa            | na      | 54  |
| YNR075W | COS10   | 2 | pfam           | PF00674 | 108 |
| YNR075W | COS10   | 3 | unassigned     | na      | 75  |
| YNR075W | COS10   | 4 | pfam           | PF00674 | 137 |
| YNR077C | YNR077C | 1 | unassigned     | na      | 84  |
| YOL001W | PHO80   | 1 | psiblast       | 1vin__  | 209 |
| YOL001W | PHO80   | 2 | msa            | na      | 84  |
| YOL002C | YOL002C | 1 | unassigned     | na      | 72  |
| YOL002C | YOL002C | 2 | pfam           | PF03006 | 255 |
| YOL003C | YOL003C | 1 | pfam           | PF01529 | 154 |
| YOL003C | YOL003C | 2 | unassigned     | na      | 224 |
| YOL004W | SIN3    | 1 | fold_recogniti | 1k83A   | 237 |
| YOL004W | SIN3    | 2 | pfam           | PF02671 | 84  |
| YOL004W | SIN3    | 3 | unassigned     | na      | 102 |
| YOL004W | SIN3    | 4 | pfam           | PF02671 | 66  |
| YOL004W | SIN3    | 5 | psiblast       | 1g1eB_  | 117 |
| YOL004W | SIN3    | 6 | fold_recogniti | 1g1eB   | 126 |
| YOL004W | SIN3    | 7 | msa            | na      | 292 |
| YOL004W | SIN3    | 8 | msa            | na      | 344 |
| YOL004W | SIN3    | 9 | msa            | na      | 168 |
| YOL005C | RPB11   | 1 | psiblast       | 1k83K_  | 120 |
| YOL006C | TOP1    | 1 | msa            | na      | 123 |
| YOL006C | TOP1    | 2 | psiblast       | 1ois__  | 133 |
| YOL006C | TOP1    | 3 | psiblast       | 1ois__  | 110 |
| YOL006C | TOP1    | 4 | psiblast       | 1a41__  | 114 |
| YOL006C | TOP1    | 5 | psiblast       | 2tmaA_  | 54  |
| YOL006C | TOP1    | 6 | psiblast       | 2tmaA_  | 81  |
| YOL006C | TOP1    | 7 | psiblast       | 2tmaA_  | 104 |
| YOL006C | TOP1    | 8 | fold_recogniti | 1a36A   | 50  |
| YOL007C | YOL007C | 1 | unassigned     | na      | 341 |
| YOL008W | YOL008W | 1 | pfam           | PF03654 | 207 |
| YOL009C | MDM12   | 1 | msa            | na      | 181 |
| YOL009C | MDM12   | 2 | unassigned     | na      | 90  |
| YOL010W | RCL1    | 1 | psiblast       | 1qmhA_  | 81  |
| YOL010W | RCL1    | 2 | psiblast       | 1qmhA_  | 96  |
| YOL010W | RCL1    | 3 | psiblast       | 1qmhA_  | 190 |
| YOL011W | PLB3    | 1 | psiblast       | 1cgyA_  | 368 |
| YOL011W | PLB3    | 2 | fold_recogniti | 1cgyA   | 245 |
| YOL011W | PLB3    | 3 | unassigned     | na      | 73  |
| YOL012C | HTZ1    | 1 | psiblast       | 1f66C_  | 66  |
| YOL012C | HTZ1    | 2 | psiblast       | 1f66C_  | 68  |

|           |           |   |                |         |     |
|-----------|-----------|---|----------------|---------|-----|
| YOL013C   | HRD1      | 1 | msa            | na      | 221 |
| YOL013C   | HRD1      | 2 | unassigned     | na      | 123 |
| YOL013C   | HRD1      | 3 | psiblast       | 1chc__  | 88  |
| YOL013C   | HRD1      | 4 | unassigned     | na      | 119 |
| YOL013W   | 5345      | 1 | unassigned     | na      | 63  |
| YOL013W-A | YOL013W-A | 1 | unassigned     | na      | 96  |
| YOL014W   | YOL014W   | 1 | unassigned     | na      | 124 |
| YOL015W   | YOL015W   | 1 | msa            | na      | 109 |
| YOL015W   | YOL015W   | 2 | unassigned     | na      | 477 |
| YOL016C   | CMK2      | 1 | psiblast       | 1a06__  | 145 |
| YOL016C   | CMK2      | 2 | psiblast       | 1a06__  | 200 |
| YOL016C   | CMK2      | 3 | psiblast       | 1extrA_ | 102 |
| YOL017W   | ESC8      | 1 | msa            | na      | 599 |
| YOL017W   | ESC8      | 2 | unassigned     | na      | 115 |
| YOL018C   | TLG2      | 1 | psiblast       | 1ez3A_  | 131 |
| YOL018C   | TLG2      | 2 | psiblast       | 1ez3A_  | 72  |
| YOL018C   | TLG2      | 3 | psiblast       | 1jthB_  | 142 |
| YOL018C   | TLG2      | 4 | unassigned     | na      | 52  |
| YOL019W   | YOL019W   | 1 | msa            | na      | 230 |
| YOL019W   | YOL019W   | 2 | fold_recogniti | 1m2vB   | 321 |
| YOL020W   | TAT2      | 1 | unassigned     | na      | 53  |
| YOL020W   | TAT2      | 2 | pfam           | PF00324 | 539 |
| YOL021C   | DIS3      | 1 | msa            | na      | 325 |
| YOL021C   | DIS3      | 2 | msa            | na      | 90  |
| YOL021C   | DIS3      | 3 | pfam           | PF00773 | 408 |
| YOL021C   | DIS3      | 4 | psiblast       | 1go3E_  | 178 |
| YOL022C   | YOL022C   | 1 | msa            | na      | 282 |
| YOL022C   | YOL022C   | 2 | msa            | na      | 126 |
| YOL023W   | IFM1      | 1 | msa            | na      | 119 |
| YOL023W   | IFM1      | 2 | psiblast       | 1g7sA_  | 203 |
| YOL023W   | IFM1      | 3 | psiblast       | 1g7sA_  | 128 |
| YOL023W   | IFM1      | 4 | psiblast       | 1g7sA_  | 117 |
| YOL023W   | IFM1      | 5 | psiblast       | 1g7sA_  | 109 |
| YOL024W   | YOL024W   | 1 | unassigned     | na      | 172 |
| YOL025W   | LAG2      | 1 | unassigned     | na      | 83  |
| YOL025W   | LAG2      | 2 | fold_recogniti | 1e6vA   | 348 |
| YOL025W   | LAG2      | 3 | fold_recogniti | 1e6vA   | 119 |
| YOL025W   | LAG2      | 4 | fold_recogniti | 1I9uD   | 110 |
| YOL026C   | MIM1      | 1 | unassigned     | na      | 113 |
| YOL027C   | MDM38     | 1 | msa            | na      | 229 |
| YOL027C   | MDM38     | 2 | psiblast       | 1i84S_  | 157 |
| YOL027C   | MDM38     | 3 | psiblast       | 1i84S_  | 187 |
| YOL028C   | YAP7      | 1 | msa            | na      | 112 |
| YOL028C   | YAP7      | 2 | psiblast       | 1hjbA_  | 133 |
| YOL029C   | YOL029C   | 1 | unassigned     | na      | 201 |
| YOL030W   | GAS5      | 1 | psiblast       | 1bglA_  | 196 |
| YOL030W   | GAS5      | 2 | psiblast       | 1bglA_  | 132 |
| YOL030W   | GAS5      | 3 | fold_recogniti | 1ldvA   | 156 |

|           |           |   |                |         |     |
|-----------|-----------|---|----------------|---------|-----|
| YOL031C   | SIL1      | 1 | unassigned     | na      | 125 |
| YOL031C   | SIL1      | 2 | fold_recogniti | 1ejll   | 106 |
| YOL031C   | SIL1      | 3 | fold_recogniti | 1ejll   | 93  |
| YOL031C   | SIL1      | 4 | fold_recogniti | 1ejll   | 97  |
| YOL032W   | YOL032W   | 1 | msa            | na      | 246 |
| YOL033W   | MSE1      | 1 | psiblast       | 1gln__  | 282 |
| YOL033W   | MSE1      | 2 | psiblast       | 1gln__  | 86  |
| YOL033W   | MSE1      | 3 | psiblast       | 1gln__  | 61  |
| YOL033W   | MSE1      | 4 | psiblast       | 1gln__  | 107 |
| YOL034W   | SMC5      | 1 | psiblast       | 1ii8A_  | 126 |
| YOL034W   | SMC5      | 2 | psiblast       | 1i84S_  | 157 |
| YOL034W   | SMC5      | 3 | psiblast       | 1cii__  | 50  |
| YOL034W   | SMC5      | 4 | psiblast       | 1cii__  | 102 |
| YOL034W   | SMC5      | 5 | psiblast       | 1cii__  | 278 |
| YOL034W   | SMC5      | 6 | psiblast       | 1c1gA_  | 190 |
| YOL034W   | SMC5      | 7 | psiblast       | 1e69A_  | 190 |
| YOL035C   | YOL035C   | 1 | unassigned     | na      | 100 |
| YOL036W   | YOL036W   | 1 | unassigned     | na      | 761 |
| YOL037C   | YOL037C   | 1 | unassigned     | na      | 117 |
| YOL038C-A | YOL038C-A | 1 | unassigned     | na      | 31  |
| YOL038W   | PRE6      | 1 | psiblast       | 1g0uC_  | 254 |
| YOL039W   | RPP2A     | 1 | pfam           | PF00428 | 106 |
| YOL040C   | RPS15     | 1 | psiblast       | 1k5xS_  | 142 |
| YOL041C   | NOP12     | 1 | psiblast       | 1fj7A_  | 90  |
| YOL041C   | NOP12     | 2 | unassigned     | na      | 58  |
| YOL041C   | NOP12     | 3 | psiblast       | 1i3kA_  | 122 |
| YOL041C   | NOP12     | 4 | psiblast       | 1i3kA_  | 102 |
| YOL041C   | NOP12     | 5 | msa            | na      | 87  |
| YOL042W   | NGL1      | 1 | fold_recogniti | 1hd7A   | 363 |
| YOL043C   | NTG2      | 1 | unassigned     | na      | 97  |
| YOL043C   | NTG2      | 2 | psiblast       | 2abk__  | 174 |
| YOL043C   | NTG2      | 3 | psiblast       | 2abk__  | 109 |
| YOL044W   | PEX15     | 1 | unassigned     | na      | 383 |
| YOL045W   | PSK2      | 1 | msa            | na      | 208 |
| YOL045W   | PSK2      | 2 | unassigned     | na      | 79  |
| YOL045W   | PSK2      | 3 | fold_recogniti | 1ii8A   | 146 |
| YOL045W   | PSK2      | 4 | unassigned     | na      | 194 |
| YOL045W   | PSK2      | 5 | psiblast       | 1dsyA_  | 186 |
| YOL045W   | PSK2      | 6 | psiblast       | 1fotA_  | 103 |
| YOL045W   | PSK2      | 7 | psiblast       | 1fotA_  | 185 |
| YOL046C   | YOL046C   | 1 | unassigned     | na      | 224 |
| YOL047C   | YOL047C   | 1 | msa            | na      | 234 |
| YOL048C   | YOL048C   | 1 | unassigned     | na      | 106 |
| YOL049W   | GSH2      | 1 | psiblast       | 2hgsA_  | 432 |
| YOL049W   | GSH2      | 2 | psiblast       | 2hgsA_  | 59  |
| YOL050C   | YOL050C   | 1 | unassigned     | na      | 106 |
| YOL051W   | GAL11     | 1 | psiblast       | 1i84S_  | 296 |
| YOL051W   | GAL11     | 2 | fold_recogniti | 1m2vB   | 211 |

|           |         |   |                |         |     |
|-----------|---------|---|----------------|---------|-----|
| YOL051W   | GAL11   | 3 | unassigned     | na      | 94  |
| YOL051W   | GAL11   | 4 | msa            | na      | 80  |
| YOL051W   | GAL11   | 5 | fold_recogniti | 1k83A   | 235 |
| YOL051W   | GAL11   | 6 | unassigned     | na      | 165 |
| YOL052C   | SPE2    | 1 | psiblast       | 1jl0A_  | 199 |
| YOL052C   | SPE2    | 2 | psiblast       | 1jl0A_  | 197 |
| YOL052C-A | DDR2    | 1 | unassigned     | na      | 61  |
| YOL053W   | YOL053W | 1 | msa            | na      | 133 |
| YOL053W   | YOL053W | 2 | unassigned     | na      | 73  |
| YOL053W   | YOL053W | 3 | msa            | na      | 189 |
| YOL054W   | PSH1    | 1 | psiblast       | 1fbvA_  | 107 |
| YOL054W   | PSH1    | 2 | psiblast       | 1fre__  | 74  |
| YOL054W   | PSH1    | 3 | msa            | na      | 150 |
| YOL054W   | PSH1    | 4 | psiblast       | 1flkA_  | 75  |
| YOL055C   | THI20   | 1 | psiblast       | 1lljA_  | 316 |
| YOL055C   | THI20   | 2 | fold_recogniti | 1dveA   | 235 |
| YOL056W   | GPM3    | 1 | psiblast       | 1bq3D_  | 303 |
| YOL057W   | YOL057W | 1 | msa            | na      | 130 |
| YOL057W   | YOL057W | 2 | pfam           | PF03571 | 581 |
| YOL058W   | ARG1    | 1 | psiblast       | 1kh1A_  | 146 |
| YOL058W   | ARG1    | 2 | psiblast       | 1kh1A_  | 118 |
| YOL058W   | ARG1    | 3 | psiblast       | 1kh1A_  | 156 |
| YOL059W   | GPD2    | 1 | unassigned     | na      | 71  |
| YOL059W   | GPD2    | 2 | psiblast       | 1evyA_  | 232 |
| YOL059W   | GPD2    | 3 | psiblast       | 1evyA_  | 137 |
| YOL060C   | MAM3    | 1 | pfam           | PF01595 | 195 |
| YOL060C   | MAM3    | 2 | psiblast       | 1zfyA_  | 326 |
| YOL060C   | MAM3    | 3 | unassigned     | na      | 185 |
| YOL061W   | PRS5    | 1 | psiblast       | 1dkrA_  | 162 |
| YOL061W   | PRS5    | 2 | psiblast       | 1dkrA_  | 154 |
| YOL061W   | PRS5    | 3 | psiblast       | 1ao0A_  | 180 |
| YOL062C   | APM4    | 1 | psiblast       | 1gw5M_  | 179 |
| YOL062C   | APM4    | 2 | psiblast       | 1gw5M_  | 312 |
| YOL063C   | MOR1    | 1 | msa            | na      | 363 |
| YOL063C   | MOR1    | 2 | unassigned     | na      | 594 |
| YOL064C   | MET22   | 1 | psiblast       | 1ka0A_  | 220 |
| YOL064C   | MET22   | 2 | psiblast       | 1ka0A_  | 137 |
| YOL065C   | INP54   | 1 | psiblast       | 1i9yA_  | 384 |
| YOL066C   | RIB2    | 1 | psiblast       | 1fjgD_  | 100 |
| YOL066C   | RIB2    | 2 | psiblast       | 1kskA_  | 66  |
| YOL066C   | RIB2    | 3 | psiblast       | 1kskA_  | 202 |
| YOL066C   | RIB2    | 4 | unassigned     | na      | 58  |
| YOL066C   | RIB2    | 5 | fold_recogniti | 1jtkA   | 165 |
| YOL067C   | RTG1    | 1 | fold_recogniti | 1am9A   | 177 |
| YOL068C   | HST1    | 1 | unassigned     | na      | 145 |
| YOL068C   | HST1    | 2 | psiblast       | 1j8fA_  | 237 |
| YOL068C   | HST1    | 3 | psiblast       | 1j8fA_  | 121 |
| YOL069W   | NUF2    | 1 | psiblast       | 1i84S_  | 323 |



|           |           |   |                |         |      |
|-----------|-----------|---|----------------|---------|------|
| YOL069W   | NUF2      | 2 | psiblast       | 2tmaA_  | 128  |
| YOL070C   | YOL070C   | 1 | unassigned     | na      | 501  |
| YOL071W   | EMI5      | 1 | pfam           | PF03937 | 162  |
| YOL072W   | THP1      | 1 | fold_recogniti | 1hz4A   | 107  |
| YOL072W   | THP1      | 2 | fold_recogniti | 1hz4A   | 117  |
| YOL072W   | THP1      | 3 | fold_recogniti | 1hz4A   | 156  |
| YOL072W   | THP1      | 4 | msa            | na      | 75   |
| YOL073C   | YOL073C   | 1 | msa            | na      | 212  |
| YOL073C   | YOL073C   | 2 | fold_recogniti | 1n6cA_  | 110  |
| YOL075C   | YOL075C   | 1 | psiblast       | 1l2tA_  | 281  |
| YOL075C   | YOL075C   | 2 | unassigned     | na      | 71   |
| YOL075C   | YOL075C   | 3 | psiblast       | 1jsqA_  | 302  |
| YOL075C   | YOL075C   | 4 | psiblast       | 1jsqA_  | 288  |
| YOL075C   | YOL075C   | 5 | msa            | na      | 296  |
| YOL075C   | YOL075C   | 6 | unassigned     | na      | 56   |
| YOL076W   | MDM20     | 1 | msa            | na      | 587  |
| YOL076W   | MDM20     | 2 | unassigned     | na      | 209  |
| YOL077C   | BRX1      | 1 | msa            | na      | 230  |
| YOL077C   | BRX1      | 2 | unassigned     | na      | 61   |
| YOL077W-A | ATP19     | 1 | unassigned     | na      | 68   |
| YOL078W   | AVO1      | 1 | unassigned     | na      | 615  |
| YOL078W   | AVO1      | 2 | msa            | na      | 176  |
| YOL078W   | AVO1      | 3 | unassigned     | na      | 224  |
| YOL078W   | AVO1      | 4 | msa            | na      | 161  |
| YOL079W   | YOL079W   | 1 | unassigned     | na      | 132  |
| YOL080C   | REX4      | 1 | unassigned     | na      | 108  |
| YOL080C   | REX4      | 2 | psiblast       | 1fxxA_  | 181  |
| YOL081W   | IRA2      | 1 | unassigned     | na      | 1260 |
| YOL081W   | IRA2      | 2 | msa            | na      | 299  |
| YOL081W   | IRA2      | 3 | unassigned     | na      | 106  |
| YOL081W   | IRA2      | 4 | psiblast       | 1nf1A_  | 121  |
| YOL081W   | IRA2      | 5 | psiblast       | 1nf1A_  | 215  |
| YOL081W   | IRA2      | 6 | unassigned     | na      | 529  |
| YOL081W   | IRA2      | 7 | msa            | na      | 347  |
| YOL081W   | IRA2      | 8 | unassigned     | na      | 202  |
| YOL082W   | ATG19     | 1 | unassigned     | na      | 415  |
| YOL083W   | YOL083W   | 1 | unassigned     | na      | 412  |
| YOL084W   | PHM7      | 1 | msa            | na      | 193  |
| YOL084W   | PHM7      | 2 | unassigned     | na      | 99   |
| YOL084W   | PHM7      | 3 | pfam           | PF02714 | 488  |
| YOL084W   | PHM7      | 4 | unassigned     | na      | 211  |
| YOL085C   | YOL085C   | 1 | unassigned     | na      | 113  |
| YOL086C   | ADH1      | 1 | psiblast       | 1hdyA_  | 140  |
| YOL086C   | ADH1      | 2 | psiblast       | 1hdyA_  | 70   |
| YOL086C   | ADH1      | 3 | psiblast       | 1hdyA_  | 138  |
| YOL086W-A | YOL086W-A | 1 | unassigned     | na      | 90   |
| YOL087C   | YOL087C   | 1 | psiblast       | 1gg2B_  | 338  |
| YOL087C   | YOL087C   | 2 | psiblast       | 1erjA_  | 131  |

|         |         |   |                |         |     |
|---------|---------|---|----------------|---------|-----|
| YOL087C | YOL087C | 3 | fold_recogniti | 1k83A   | 368 |
| YOL087C | YOL087C | 4 | fold_recogniti | 1m2vB   | 111 |
| YOL087C | YOL087C | 5 | msa            | na      | 168 |
| YOL088C | MPD2    | 1 | psiblast       | 1quwA_  | 144 |
| YOL088C | MPD2    | 2 | psiblast       | 1bjx__  | 133 |
| YOL089C | HAL9    | 1 | msa            | na      | 111 |
| YOL089C | HAL9    | 2 | psiblast       | 2alcA_  | 82  |
| YOL089C | HAL9    | 3 | unassigned     | na      | 91  |
| YOL089C | HAL9    | 4 | msa            | na      | 297 |
| YOL089C | HAL9    | 5 | msa            | na      | 225 |
| YOL089C | HAL9    | 6 | unassigned     | na      | 224 |
| YOL090W | MSH2    | 1 | psiblast       | 1e3mA_  | 118 |
| YOL090W | MSH2    | 2 | psiblast       | 1e3mA_  | 174 |
| YOL090W | MSH2    | 3 | psiblast       | 1e3mA_  | 297 |
| YOL090W | MSH2    | 4 | psiblast       | 1e3mA_  | 215 |
| YOL090W | MSH2    | 5 | psiblast       | 1e3mA_  | 79  |
| YOL090W | MSH2    | 6 | unassigned     | na      | 81  |
| YOL091W | SPO21   | 1 | psiblast       | 1i84S_  | 392 |
| YOL091W | SPO21   | 2 | msa            | na      | 217 |
| YOL092W | YOL092W | 1 | msa            | na      | 308 |
| YOL093W | TRM10   | 1 | unassigned     | na      | 85  |
| YOL093W | TRM10   | 2 | msa            | na      | 208 |
| YOL094C | RFC4    | 1 | psiblast       | 1iqpA_  | 78  |
| YOL094C | RFC4    | 2 | psiblast       | 1iqpA_  | 245 |
| YOL095C | HMI1    | 1 | psiblast       | 1pjr__  | 274 |
| YOL095C | HMI1    | 2 | psiblast       | 1pjr__  | 432 |
| YOL096C | COQ3    | 1 | psiblast       | 1fp1D_  | 68  |
| YOL096C | COQ3    | 2 | psiblast       | 1kp9A_  | 248 |
| YOL097C | WRS1    | 1 | psiblast       | 1jiiA_  | 287 |
| YOL097C | WRS1    | 2 | psiblast       | 1jiiA_  | 145 |
| YOL098C | YOL098C | 1 | psiblast       | 1bccA_  | 273 |
| YOL098C | YOL098C | 2 | psiblast       | 1bccA_  | 225 |
| YOL098C | YOL098C | 3 | unassigned     | na      | 52  |
| YOL098C | YOL098C | 4 | fold_recogniti | 1kb9A   | 251 |
| YOL098C | YOL098C | 5 | fold_recogniti | 1kb9A   | 236 |
| YOL099C | YOL099C | 1 | unassigned     | na      | 163 |
| YOL100W | PKH2    | 1 | psiblast       | 1a25A_  | 132 |
| YOL100W | PKH2    | 2 | psiblast       | 1fotA_  | 149 |
| YOL100W | PKH2    | 3 | psiblast       | 1fotA_  | 218 |
| YOL100W | PKH2    | 4 | fold_recogniti | 1k83A   | 316 |
| YOL100W | PKH2    | 5 | unassigned     | na      | 266 |
| YOL101C | YOL101C | 1 | pfam           | PF03006 | 312 |
| YOL102C | TPT1    | 1 | pfam           | PF01885 | 230 |
| YOL103W | ITR2    | 1 | unassigned     | na      | 93  |
| YOL103W | ITR2    | 2 | psiblast       | 1ja5A_  | 421 |
| YOL103W | ITR2    | 3 | psiblast       | 1ja5A_  | 98  |
| YOL104C | NDJ1    | 1 | unassigned     | na      | 352 |
| YOL105C | WSC3    | 1 | pfam           | PF01822 | 112 |

|         |         |   |                |         |     |
|---------|---------|---|----------------|---------|-----|
| YOL105C | WSC3    | 2 | fold_recogniti | 1deqA   | 61  |
| YOL105C | WSC3    | 3 | fold_recogniti | 1ei3A   | 302 |
| YOL105C | WSC3    | 4 | unassigned     | na      | 81  |
| YOL106W | YOL106W | 1 | unassigned     | na      | 117 |
| YOL107W | YOL107W | 1 | msa            | na      | 242 |
| YOL107W | YOL107W | 2 | msa            | na      | 100 |
| YOL108C | INO4    | 1 | fold_recogniti | 1hloA   | 151 |
| YOL109W | ZEO1    | 1 | psiblast       | 1av1A_  | 113 |
| YOL110W | SHR5    | 1 | unassigned     | na      | 237 |
| YOL111C | YOL111C | 1 | unassigned     | na      | 72  |
| YOL111C | YOL111C | 2 | psiblast       | 1aarA_  | 140 |
| YOL112W | MSB4    | 1 | unassigned     | na      | 91  |
| YOL112W | MSB4    | 2 | psiblast       | 1fkmA_  | 264 |
| YOL112W | MSB4    | 3 | psiblast       | 1fkmA_  | 76  |
| YOL112W | MSB4    | 4 | msa            | na      | 61  |
| YOL113W | SKM1    | 1 | fold_recogniti | 1fhwA   | 117 |
| YOL113W | SKM1    | 2 | psiblast       | 1f3mA_  | 89  |
| YOL113W | SKM1    | 3 | unassigned     | na      | 99  |
| YOL113W | SKM1    | 4 | psiblast       | 1f3mC_  | 149 |
| YOL113W | SKM1    | 5 | psiblast       | 1f3mC_  | 201 |
| YOL114C | YOL114C | 1 | psiblast       | 1gqeA_  | 202 |
| YOL115W | TRF4    | 1 | unassigned     | na      | 116 |
| YOL115W | TRF4    | 2 | psiblast       | 1f5aA_  | 357 |
| YOL115W | TRF4    | 3 | psiblast       | 1f5aA_  | 111 |
| YOL116W | MSN1    | 1 | unassigned     | na      | 87  |
| YOL116W | MSN1    | 2 | msa            | na      | 151 |
| YOL116W | MSN1    | 3 | unassigned     | na      | 144 |
| YOL117W | RRI2    | 1 | unassigned     | na      | 275 |
| YOL117W | RRI2    | 2 | fold_recogniti | 1qoyA   | 285 |
| YOL117W | RRI2    | 3 | unassigned     | na      | 85  |
| YOL118C | YOL118C | 1 | unassigned     | na      | 102 |
| YOL119C | MCH4    | 1 | msa            | na      | 87  |
| YOL119C | MCH4    | 2 | psiblast       | 1lviA_  | 414 |
| YOL121C | RPS19A  | 1 | pfam           | PF01090 | 144 |
| YOL122C | SMF1    | 1 | unassigned     | na      | 94  |
| YOL122C | SMF1    | 2 | pfam           | PF01566 | 412 |
| YOL122C | SMF1    | 3 | unassigned     | na      | 69  |
| YOL123W | HRP1    | 1 | unassigned     | na      | 58  |
| YOL123W | HRP1    | 2 | psiblast       | 1cvjA_  | 94  |
| YOL123W | HRP1    | 3 | psiblast       | 2up1A_  | 92  |
| YOL123W | HRP1    | 4 | psiblast       | 1qm9A_  | 103 |
| YOL123W | HRP1    | 5 | psiblast       | 1qm9A_  | 82  |
| YOL123W | HRP1    | 6 | unassigned     | na      | 105 |
| YOL124C | YOL124C | 1 | unassigned     | na      | 112 |
| YOL124C | YOL124C | 2 | psiblast       | 1g60A_  | 79  |
| YOL124C | YOL124C | 3 | psiblast       | 2admA_  | 242 |
| YOL125W | YOL125W | 1 | msa            | na      | 228 |
| YOL125W | YOL125W | 2 | unassigned     | na      | 248 |

|         |         |   |                |         |     |
|---------|---------|---|----------------|---------|-----|
| YOL126C | MDH2    | 1 | psiblast       | 1mldA_  | 423 |
| YOL127W | RPL25   | 1 | pfam           | PF03939 | 54  |
| YOL127W | RPL25   | 2 | psiblast       | 1k5yT_  | 88  |
| YOL128C | YGK3    | 1 | psiblast       | 1i09A_  | 126 |
| YOL128C | YGK3    | 2 | psiblast       | 1i09A_  | 249 |
| YOL129W | VPS68   | 1 | unassigned     | na      | 184 |
| YOL130W | ALR1    | 1 | unassigned     | na      | 365 |
| YOL130W | ALR1    | 2 | msa            | na      | 189 |
| YOL130W | ALR1    | 3 | fold_recogniti | 1hciA   | 123 |
| YOL130W | ALR1    | 4 | fold_recogniti | 1hciA   | 182 |
| YOL131W | YOL131W | 1 | unassigned     | na      | 108 |
| YOL132W | GAS4    | 1 | pfam           | PF03198 | 343 |
| YOL132W | GAS4    | 2 | unassigned     | na      | 128 |
| YOL133W | HRT1    | 1 | psiblast       | 1ldjB_  | 121 |
| YOL134C | YOL134C | 1 | unassigned     | na      | 129 |
| YOL135C | MED7    | 1 | msa            | na      | 222 |
| YOL136C | PFK27   | 1 | psiblast       | 2bifA_  | 327 |
| YOL136C | PFK27   | 2 | unassigned     | na      | 70  |
| YOL137W | BSC6    | 1 | unassigned     | na      | 59  |
| YOL137W | BSC6    | 2 | psiblast       | 1lviA_  | 438 |
| YOL138C | YOL138C | 1 | psiblast       | 1c5kA_  | 110 |
| YOL138C | YOL138C | 2 | psiblast       | 1erjA_  | 328 |
| YOL138C | YOL138C | 3 | psiblast       | 1gg2B_  | 114 |
| YOL138C | YOL138C | 4 | msa            | na      | 163 |
| YOL138C | YOL138C | 5 | unassigned     | na      | 414 |
| YOL138C | YOL138C | 6 | msa            | na      | 212 |
| YOL139C | CDC33   | 1 | psiblast       | 1ap8__  | 213 |
| YOL140W | ARG8    | 1 | psiblast       | 1lx9A_  | 423 |
| YOL141W | PPM2    | 1 | msa            | na      | 363 |
| YOL141W | PPM2    | 2 | psiblast       | 1gof__  | 332 |
| YOL142W | RRP40   | 1 | fold_recogniti | 1e3hA   | 146 |
| YOL142W | RRP40   | 2 | msa            | na      | 94  |
| YOL143C | RIB4    | 1 | psiblast       | 1ejbA_  | 169 |
| YOL144W | NOP8    | 1 | psiblast       | 1b7fA_  | 155 |
| YOL144W | NOP8    | 2 | unassigned     | na      | 329 |
| YOL145C | CTR9    | 1 | psiblast       | 1elrA_  | 128 |
| YOL145C | CTR9    | 2 | psiblast       | 1fchA_  | 138 |
| YOL145C | CTR9    | 3 | psiblast       | 1fchA_  | 86  |
| YOL145C | CTR9    | 4 | psiblast       | 1fchA_  | 139 |
| YOL145C | CTR9    | 5 | unassigned     | na      | 52  |
| YOL145C | CTR9    | 6 | psiblast       | 1jcqA_  | 86  |
| YOL145C | CTR9    | 7 | psiblast       | 1jcqA_  | 59  |
| YOL145C | CTR9    | 8 | psiblast       | 1i84S_  | 122 |
| YOL145C | CTR9    | 9 | psiblast       | 1i84S_  | 267 |
| YOL146W | PSF3    | 1 | fold_recogniti | 1ek8A   | 122 |
| YOL146W | PSF3    | 2 | fold_recogniti | 1ek8A   | 114 |
| YOL147C | PEX11   | 1 | unassigned     | na      | 115 |
| YOL147C | PEX11   | 2 | msa            | na      | 121 |

|           |           |   |                |         |     |
|-----------|-----------|---|----------------|---------|-----|
| YOL148C   | SPT20     | 1 | unassigned     | na      | 604 |
| YOL149W   | DCP1      | 1 | unassigned     | na      | 231 |
| YOL150C   | YOL150C   | 1 | unassigned     | na      | 103 |
| YOL151W   | GRE2      | 1 | psiblast       | 1keuA_  | 159 |
| YOL151W   | GRE2      | 2 | psiblast       | 1keuA_  | 116 |
| YOL151W   | GRE2      | 3 | psiblast       | 1keuA_  | 67  |
| YOL152W   | FRE7      | 1 | unassigned     | na      | 78  |
| YOL152W   | FRE7      | 2 | msa            | na      | 236 |
| YOL152W   | FRE7      | 3 | psiblast       | 1cnf__  | 99  |
| YOL152W   | FRE7      | 4 | psiblast       | 1cnf__  | 140 |
| YOL152W   | FRE7      | 5 | unassigned     | na      | 76  |
| YOL153C   | YOL153C   | 1 | unassigned     | na      | 130 |
| YOL154W   | ZPS1      | 1 | fold_recogniti | 1ge5A   | 249 |
| YOL155C   | YOL155C   | 1 | msa            | na      | 428 |
| YOL155C   | YOL155C   | 2 | unassigned     | na      | 63  |
| YOL155C   | YOL155C   | 3 | msa            | na      | 476 |
| YOL156W   | HXT11     | 1 | psiblast       | 1ja5A_  | 470 |
| YOL156W   | HXT11     | 2 | psiblast       | 1ja5A_  | 97  |
| YOL157C   | YOL157C   | 1 | psiblast       | 1uok__  | 302 |
| YOL157C   | YOL157C   | 2 | psiblast       | 1uok__  | 287 |
| YOL158C   | ENB1      | 1 | psiblast       | 1lviA_  | 256 |
| YOL158C   | ENB1      | 2 | unassigned     | na      | 69  |
| YOL158C   | ENB1      | 3 | msa            | na      | 208 |
| YOL158C   | ENB1      | 4 | unassigned     | na      | 73  |
| YOL159C   | YOL159C   | 1 | unassigned     | na      | 171 |
| YOL159C-A | YOL159C-A | 1 | unassigned     | na      | 90  |
| YOL160W   | YOL160W   | 1 | unassigned     | na      | 113 |
| YOL161C   | YOL161C   | 1 | pfam           | PF00660 | 120 |
| YOL162W   | YOL162W   | 1 | msa            | na      | 145 |
| YOL162W   | YOL162W   | 2 | unassigned     | na      | 70  |
| YOL163W   | YOL163W   | 1 | psiblast       | 1ja5A_  | 169 |
| YOL164W   | YOL164W   | 1 | unassigned     | na      | 80  |
| YOL164W   | YOL164W   | 2 | psiblast       | 1bc2A_  | 174 |
| YOL164W   | YOL164W   | 3 | psiblast       | 1bc2A_  | 118 |
| YOL164W   | YOL164W   | 4 | unassigned     | na      | 55  |
| YOL164W   | YOL164W   | 5 | fold_recogniti | 1hxiA   | 89  |
| YOL164W   | YOL164W   | 6 | psiblast       | 1iktA_  | 130 |
| YOL165C   | AAD15     | 1 | psiblast       | 1exbA_  | 143 |
| YOL166C   | YOL166C   | 1 | unassigned     | na      | 112 |
| YOR001W   | RRP6      | 1 | psiblast       | 1j5fA_  | 187 |
| YOR001W   | RRP6      | 2 | psiblast       | 1m0yA_  | 233 |
| YOR001W   | RRP6      | 3 | msa            | na      | 107 |
| YOR001W   | RRP6      | 4 | msa            | na      | 206 |
| YOR002W   | ALG6      | 1 | pfam           | PF03155 | 544 |
| YOR003W   | YSP3      | 1 | unassigned     | na      | 68  |
| YOR003W   | YSP3      | 2 | psiblast       | 1kn6A_  | 104 |
| YOR003W   | YSP3      | 3 | psiblast       | 1ic6A_  | 306 |
| YOR004W   | YOR004W   | 1 | msa            | na      | 198 |

|           |           |   |                |         |     |
|-----------|-----------|---|----------------|---------|-----|
| YOR004W   | YOR004W   | 2 | unassigned     | na      | 56  |
| YOR005C   | DNL4      | 1 | msa            | na      | 242 |
| YOR005C   | DNL4      | 2 | fold_recogniti | 1fviA   | 67  |
| YOR005C   | DNL4      | 3 | psiblast       | 1fviA_  | 112 |
| YOR005C   | DNL4      | 4 | psiblast       | 1fviA_  | 47  |
| YOR005C   | DNL4      | 5 | psiblast       | 1fviA_  | 111 |
| YOR005C   | DNL4      | 6 | unassigned     | na      | 154 |
| YOR005C   | DNL4      | 7 | psiblast       | 1ik9C_  | 83  |
| YOR005C   | DNL4      | 8 | unassigned     | na      | 128 |
| YOR006C   | YOR006C   | 1 | msa            | na      | 238 |
| YOR006C   | YOR006C   | 2 | unassigned     | na      | 75  |
| YOR007C   | SGT2      | 1 | unassigned     | na      | 61  |
| YOR007C   | SGT2      | 2 | psiblast       | 1a17__  | 230 |
| YOR007C   | SGT2      | 3 | unassigned     | na      | 55  |
| YOR008C   | SLG1      | 1 | fold_recogniti | 1ei3A   | 64  |
| YOR008C   | SLG1      | 2 | fold_recogniti | 1m2vB   | 314 |
| YOR008C-A | YOR008C-A | 1 | unassigned     | na      | 74  |
| YOR008W-B | YOR008W-B | 1 | unassigned     | na      | 33  |
| YOR009W   | TIR4      | 1 | pfam           | PF00660 | 123 |
| YOR009W   | TIR4      | 2 | fold_recogniti | 1ei3A   | 300 |
| YOR009W   | TIR4      | 3 | fold_recogniti | 1deqA   | 64  |
| YOR010C   | TIR2      | 1 | pfam           | PF00660 | 119 |
| YOR010C   | TIR2      | 2 | msa            | na      | 132 |
| YOR011W   | AUS1      | 1 | psiblast       | 1g291_  | 360 |
| YOR011W   | AUS1      | 2 | msa            | na      | 224 |
| YOR011W   | AUS1      | 3 | unassigned     | na      | 153 |
| YOR011W   | AUS1      | 4 | pfam           | PF00005 | 247 |
| YOR011W   | AUS1      | 5 | msa            | na      | 305 |
| YOR011W   | AUS1      | 6 | unassigned     | na      | 105 |
| YOR012W   | YOR012W   | 1 | unassigned     | na      | 137 |
| YOR013W   | YOR013W   | 1 | unassigned     | na      | 156 |
| YOR014W   | RTS1      | 1 | fold_recogniti | 1ei3A   | 282 |
| YOR014W   | RTS1      | 2 | msa            | na      | 92  |
| YOR014W   | RTS1      | 3 | fold_recogniti | 1b3uA   | 95  |
| YOR014W   | RTS1      | 4 | fold_recogniti | 1b3uA   | 288 |
| YOR015W   | YOR015W   | 1 | unassigned     | na      | 119 |
| YOR016C   | ERP4      | 1 | pfam           | PF01105 | 207 |
| YOR017W   | PET127    | 1 | unassigned     | na      | 147 |
| YOR017W   | PET127    | 2 | msa            | na      | 495 |
| YOR017W   | PET127    | 3 | unassigned     | na      | 158 |
| YOR018W   | ROD1      | 1 | msa            | na      | 122 |
| YOR018W   | ROD1      | 2 | psiblast       | 1jsyA_  | 139 |
| YOR018W   | ROD1      | 3 | psiblast       | 1jsyA_  | 155 |
| YOR018W   | ROD1      | 4 | fold_recogniti | 1k28D   | 301 |
| YOR018W   | ROD1      | 5 | fold_recogniti | 1k28D   | 120 |
| YOR019W   | YOR019W   | 1 | msa            | na      | 134 |
| YOR019W   | YOR019W   | 2 | unassigned     | na      | 83  |
| YOR019W   | YOR019W   | 3 | fold_recogniti | 1jmvA   | 214 |

|         |         |   |                |         |     |
|---------|---------|---|----------------|---------|-----|
| YOR019W | YOR019W | 4 | unassigned     | na      | 299 |
| YOR020C | HSP10   | 1 | psiblast       | 1hx5A_  | 106 |
| YOR021C | YOR021C | 1 | unassigned     | na      | 78  |
| YOR021C | YOR021C | 2 | msa            | na      | 135 |
| YOR022C | YOR022C | 1 | unassigned     | na      | 261 |
| YOR022C | YOR022C | 2 | msa            | na      | 166 |
| YOR022C | YOR022C | 3 | unassigned     | na      | 64  |
| YOR022C | YOR022C | 4 | pfam           | PF02862 | 224 |
| YOR023C | AHC1    | 1 | unassigned     | na      | 261 |
| YOR023C | AHC1    | 2 | fold_recogniti | 1ldvA   | 305 |
| YOR024W | YOR024W | 1 | unassigned     | na      | 107 |
| YOR025W | HST3    | 1 | psiblast       | 1j8fA_  | 275 |
| YOR025W | HST3    | 2 | psiblast       | 1j8fA_  | 117 |
| YOR025W | HST3    | 3 | unassigned     | na      | 55  |
| YOR026W | BUB3    | 1 | psiblast       | 1b9xA_  | 341 |
| YOR027W | STI1    | 1 | psiblast       | 1elwA_  | 147 |
| YOR027W | STI1    | 2 | unassigned     | na      | 77  |
| YOR027W | STI1    | 3 | psiblast       | 1elrA_  | 117 |
| YOR027W | STI1    | 4 | psiblast       | 1elrA_  | 50  |
| YOR027W | STI1    | 5 | psiblast       | 1a17__  | 198 |
| YOR028C | CIN5    | 1 | msa            | na      | 229 |
| YOR028C | CIN5    | 2 | psiblast       | 1gd2E_  | 66  |
| YOR029W | YOR029W | 1 | unassigned     | na      | 111 |
| YOR030W | DFG16   | 1 | unassigned     | na      | 157 |
| YOR030W | DFG16   | 2 | msa            | na      | 321 |
| YOR030W | DFG16   | 3 | unassigned     | na      | 141 |
| YOR031W | CRS5    | 1 | unassigned     | na      | 8   |
| YOR032C | HMS1    | 1 | msa            | na      | 263 |
| YOR032C | HMS1    | 2 | psiblast       | 1am9A_  | 171 |
| YOR033C | EXO1    | 1 | psiblast       | 1a76__  | 361 |
| YOR033C | EXO1    | 2 | psiblast       | 1d9dA_  | 66  |
| YOR033C | EXO1    | 3 | unassigned     | na      | 275 |
| YOR034C | AKR2    | 1 | unassigned     | na      | 80  |
| YOR034C | AKR2    | 2 | psiblast       | 1k1aA_  | 104 |
| YOR034C | AKR2    | 3 | psiblast       | 1k1aA_  | 153 |
| YOR034C | AKR2    | 4 | msa            | na      | 300 |
| YOR034C | AKR2    | 5 | msa            | na      | 112 |
| YOR035C | SHE4    | 1 | unassigned     | na      | 659 |
| YOR035C | SHE4    | 2 | fold_recogniti | 1b3uA   | 130 |
| YOR036W | PEP12   | 1 | psiblast       | 1dn1B_  | 229 |
| YOR036W | PEP12   | 2 | psiblast       | 1dn1B_  | 59  |
| YOR037W | CYC2    | 1 | unassigned     | na      | 90  |
| YOR037W | CYC2    | 2 | psiblast       | 1ndh__  | 134 |
| YOR037W | CYC2    | 3 | psiblast       | 1ndh__  | 180 |
| YOR038C | HIR2    | 1 | msa            | na      | 85  |
| YOR038C | HIR2    | 2 | psiblast       | 1gg2B_  | 388 |
| YOR038C | HIR2    | 3 | msa            | na      | 225 |
| YOR038C | HIR2    | 4 | unassigned     | na      | 54  |

|         |         |   |                |         |     |
|---------|---------|---|----------------|---------|-----|
| YOR038C | HIR2    | 5 | fold_recogniti | 1bgxT   | 123 |
| YOR039W | CKB2    | 1 | psiblast       | 1jwhC_  | 97  |
| YOR039W | CKB2    | 2 | psiblast       | 1jwhC_  | 161 |
| YOR040W | GLO4    | 1 | psiblast       | 1qh3A_  | 130 |
| YOR040W | GLO4    | 2 | psiblast       | 1qh3A_  | 70  |
| YOR040W | GLO4    | 3 | psiblast       | 1qh3A_  | 85  |
| YOR041C | SRF5    | 1 | unassigned     | na      | 143 |
| YOR042W | CUE5    | 1 | unassigned     | na      | 88  |
| YOR042W | CUE5    | 2 | pfam           | PF02845 | 71  |
| YOR042W | CUE5    | 3 | unassigned     | na      | 252 |
| YOR043W | WHI2    | 1 | msa            | na      | 309 |
| YOR043W | WHI2    | 2 | unassigned     | na      | 177 |
| YOR044W | YOR044W | 1 | unassigned     | na      | 157 |
| YOR045W | TOM6    | 1 | unassigned     | na      | 61  |
| YOR046C | DBP5    | 1 | psiblast       | 1fuuA_  | 482 |
| YOR047C | STD1    | 1 | unassigned     | na      | 444 |
| YOR048C | RAT1    | 1 | pfam           | PF03159 | 271 |
| YOR048C | RAT1    | 2 | unassigned     | na      | 407 |
| YOR048C | RAT1    | 3 | msa            | na      | 111 |
| YOR048C | RAT1    | 4 | unassigned     | na      | 91  |
| YOR048C | RAT1    | 5 | msa            | na      | 126 |
| YOR049C | RSB1    | 1 | unassigned     | na      | 183 |
| YOR049C | RSB1    | 2 | msa            | na      | 171 |
| YOR050C | YOR050C | 1 | unassigned     | na      | 115 |
| YOR051C | YOR051C | 1 | psiblast       | 1i84S_  | 251 |
| YOR051C | YOR051C | 2 | fold_recogniti | 1llwA   | 161 |
| YOR052C | YOR052C | 1 | msa            | na      | 88  |
| YOR052C | YOR052C | 2 | pfam           | PF01428 | 62  |
| YOR053W | YOR053W | 1 | unassigned     | na      | 113 |
| YOR054C | VHS3    | 1 | unassigned     | na      | 281 |
| YOR054C | VHS3    | 2 | fold_recogniti | 1mvIA   | 94  |
| YOR054C | VHS3    | 3 | psiblast       | 1e20A_  | 217 |
| YOR054C | VHS3    | 4 | unassigned     | na      | 82  |
| YOR055W | YOR055W | 1 | unassigned     | na      | 144 |
| YOR056C | NOB1    | 1 | msa            | na      | 177 |
| YOR056C | NOB1    | 2 | msa            | na      | 282 |
| YOR057W | SGT1    | 1 | psiblast       | 1a17__  | 54  |
| YOR057W | SGT1    | 2 | psiblast       | 1d8dA_  | 178 |
| YOR057W | SGT1    | 3 | psiblast       | 1lg0A_  | 84  |
| YOR057W | SGT1    | 4 | unassigned     | na      | 79  |
| YOR058C | ASE1    | 1 | msa            | na      | 298 |
| YOR058C | ASE1    | 2 | psiblast       | 1i84S_  | 448 |
| YOR058C | ASE1    | 3 | unassigned     | na      | 139 |
| YOR059C | YOR059C | 1 | psiblast       | 1eh5A_  | 256 |
| YOR059C | YOR059C | 2 | unassigned     | na      | 194 |
| YOR060C | YOR060C | 1 | unassigned     | na      | 257 |
| YOR061W | CKA2    | 1 | psiblast       | 1ds5A_  | 167 |
| YOR061W | CKA2    | 2 | psiblast       | 1ds5A_  | 111 |



|         |         |   |                |         |     |
|---------|---------|---|----------------|---------|-----|
| YOR061W | CKA2    | 3 | psiblast       | 1ds5A_  | 61  |
| YOR062C | YOR062C | 1 | msa            | na      | 127 |
| YOR062C | YOR062C | 2 | unassigned     | na      | 141 |
| YOR063W | RPL3    | 1 | psiblast       | 1k5yC_  | 64  |
| YOR063W | RPL3    | 2 | psiblast       | 1k5yC_  | 191 |
| YOR063W | RPL3    | 3 | psiblast       | 1k5yC_  | 132 |
| YOR064C | YNG1    | 1 | msa            | na      | 121 |
| YOR064C | YNG1    | 2 | psiblast       | 1f62A_  | 98  |
| YOR065W | CYT1    | 1 | psiblast       | 1kyoD_  | 309 |
| YOR066W | YOR066W | 1 | fold_recogniti | 1ivoA   | 547 |
| YOR066W | YOR066W | 2 | fold_recogniti | 1m6bA   | 82  |
| YOR067C | ALG8    | 1 | pfam           | PF03155 | 577 |
| YOR068C | VAM10   | 1 | unassigned     | na      | 114 |
| YOR069W | VPS5    | 1 | psiblast       | 1bg2__  | 198 |
| YOR069W | VPS5    | 2 | psiblast       | 1i84S_  | 234 |
| YOR069W | VPS5    | 3 | psiblast       | 1i84S_  | 243 |
| YOR070C | GYP1    | 1 | msa            | na      | 238 |
| YOR070C | GYP1    | 2 | psiblast       | 1fkmA_  | 248 |
| YOR070C | GYP1    | 3 | psiblast       | 1fkmA_  | 151 |
| YOR071C | YOR071C | 1 | pfam           | PF02133 | 544 |
| YOR071C | YOR071C | 2 | unassigned     | na      | 54  |
| YOR072W | YOR072W | 1 | unassigned     | na      | 104 |
| YOR073W | SGO1    | 1 | msa            | na      | 410 |
| YOR073W | SGO1    | 2 | unassigned     | na      | 180 |
| YOR074C | CDC21   | 1 | psiblast       | 1ci7A_  | 220 |
| YOR074C | CDC21   | 2 | psiblast       | 1ci7A_  | 84  |
| YOR075W | UFE1    | 1 | psiblast       | 1dn1B_  | 285 |
| YOR075W | UFE1    | 2 | psiblast       | 1dn1B_  | 61  |
| YOR076C | SKI7    | 1 | unassigned     | na      | 70  |
| YOR076C | SKI7    | 2 | msa            | na      | 190 |
| YOR076C | SKI7    | 3 | psiblast       | 1f60A_  | 213 |
| YOR076C | SKI7    | 4 | psiblast       | 1f60A_  | 165 |
| YOR076C | SKI7    | 5 | psiblast       | 1f60A_  | 109 |
| YOR077W | RTS2    | 1 | msa            | na      | 232 |
| YOR078W | BUD21   | 1 | unassigned     | na      | 214 |
| YOR079C | ATX2    | 1 | msa            | na      | 128 |
| YOR079C | ATX2    | 2 | pfam           | PF02535 | 185 |
| YOR080W | DIA2    | 1 | fold_recogniti | 1qqeA   | 215 |
| YOR080W | DIA2    | 2 | pfam           | PF00646 | 51  |
| YOR080W | DIA2    | 3 | unassigned     | na      | 344 |
| YOR080W | DIA2    | 4 | msa            | na      | 136 |
| YOR081C | STC2    | 1 | fold_recogniti | 1itwA   | 314 |
| YOR081C | STC2    | 2 | msa            | na      | 103 |
| YOR081C | STC2    | 3 | msa            | na      | 332 |
| YOR082C | YOR082C | 1 | unassigned     | na      | 113 |
| YOR083W | WHI5    | 1 | unassigned     | na      | 295 |
| YOR084W | YOR084W | 1 | psiblast       | 1cqzA_  | 387 |
| YOR085W | OST3    | 1 | msa            | na      | 95  |

|         |         |      |                  |         |     |
|---------|---------|------|------------------|---------|-----|
| YOR085W | OST3    |      | 2 msa            | na      | 255 |
| YOR086C | TCB1    |      | 1 unassigned     | na      | 80  |
| YOR086C | TCB1    |      | 2 msa            | na      | 290 |
| YOR086C | TCB1    |      | 3 psiblast       | 1gmiA_  | 136 |
| YOR086C | TCB1    |      | 4 psiblast       | 1dqvA_  | 134 |
| YOR086C | TCB1    |      | 5 psiblast       | 1dqvA_  | 151 |
| YOR086C | TCB1    |      | 6 unassigned     | na      | 139 |
| YOR086C | TCB1    |      | 7 psiblast       | 1dsyA_  | 200 |
| YOR086C | TCB1    |      | 8 unassigned     | na      | 56  |
| YOR087W | YVC1    |      | 1 unassigned     | na      | 247 |
| YOR088W |         | 5593 | 1 unassigned     | na      | 72  |
| YOR088W |         | 5593 | 2 pfam           | PF00520 | 193 |
| YOR088W |         | 5593 | 3 msa            | na      | 115 |
| YOR088W |         | 5593 | 4 msa            | na      | 102 |
| YOR089C | VPS21   |      | 1 psiblast       | 1ek0A_  | 210 |
| YOR090C | PTC5    |      | 1 unassigned     | na      | 106 |
| YOR090C | PTC5    |      | 2 psiblast       | 1a6q__  | 466 |
| YOR091W | YOR091W |      | 1 msa            | na      | 401 |
| YOR092W | ECM3    |      | 1 msa            | na      | 174 |
| YOR092W | ECM3    |      | 2 unassigned     | na      | 196 |
| YOR092W | ECM3    |      | 3 msa            | na      | 243 |
| YOR093C | YOR093C |      | 1 msa            | na      | 61  |
| YOR093C | YOR093C |      | 2 unassigned     | na      | 78  |
| YOR093C | YOR093C |      | 3 psiblast       | 1amuA_  | 292 |
| YOR093C | YOR093C |      | 4 psiblast       | 1amuA_  | 261 |
| YOR093C | YOR093C |      | 5 psiblast       | 1amuA_  | 140 |
| YOR093C | YOR093C |      | 6 psiblast       | 1dnyA_  | 78  |
| YOR093C | YOR093C |      | 7 unassigned     | na      | 63  |
| YOR093C | YOR093C |      | 8 psiblast       | 1ba3__  | 189 |
| YOR093C | YOR093C |      | 9 psiblast       | 1ba3__  | 348 |
| YOR093C | YOR093C |      | 10 psiblast      | 1ba3__  | 138 |
| YOR094W | ARF3    |      | 1 psiblast       | 1e0sA_  | 183 |
| YOR095C | RK11    |      | 1 psiblast       | 1lk5A_  | 169 |
| YOR095C | RK11    |      | 2 psiblast       | 1lk5A_  | 89  |
| YOR096W | RPS7A   |      | 1 pfam           | PF01251 | 190 |
| YOR097C | YOR097C |      | 1 unassigned     | na      | 175 |
| YOR098C | NUP1    |      | 1 msa            | na      | 276 |
| YOR098C | NUP1    |      | 2 msa            | na      | 800 |
| YOR099W | KTR1    |      | 1 pfam           | PF01793 | 393 |
| YOR100C | CRC1    |      | 1 fold_recogniti | 1is2A   | 327 |
| YOR101W | RAS1    |      | 1 psiblast       | 821p__  | 185 |
| YOR101W | RAS1    |      | 2 unassigned     | na      | 59  |
| YOR101W | RAS1    |      | 3 msa            | na      | 65  |
| YOR102W | YOR102W |      | 1 unassigned     | na      | 116 |
| YOR103C | OST2    |      | 1 pfam           | PF02109 | 133 |
| YOR104W | PIN2    |      | 1 unassigned     | na      | 282 |
| YOR105W | YOR105W |      | 1 unassigned     | na      | 108 |
| YOR106W | VAM3    |      | 1 psiblast       | 1hs7A_  | 121 |

|         |         |   |                |         |      |
|---------|---------|---|----------------|---------|------|
| YOR106W | VAM3    | 2 | unassigned     | na      | 64   |
| YOR106W | VAM3    | 3 | fold_recogniti | 1gl2B   | 98   |
| YOR107W | RGS2    | 1 | psiblast       | 1cmzA_  | 195  |
| YOR107W | RGS2    | 2 | unassigned     | na      | 114  |
| YOR108W | LEU9    | 1 | unassigned     | na      | 52   |
| YOR108W | LEU9    | 2 | fold_recogniti | 1euaA   | 166  |
| YOR108W | LEU9    | 3 | fold_recogniti | 1f5zA   | 272  |
| YOR108W | LEU9    | 4 | msa            | na      | 114  |
| YOR109W | INP53   | 1 | pfam           | PF02383 | 403  |
| YOR109W | INP53   | 2 | unassigned     | na      | 92   |
| YOR109W | INP53   | 3 | psiblast       | 1i9yA_  | 394  |
| YOR109W | INP53   | 4 | fold_recogniti | 1ldvA   | 218  |
| YOR110W | TFC7    | 1 | psiblast       | 1bq3D_  | 233  |
| YOR110W | TFC7    | 2 | msa            | na      | 202  |
| YOR111W | YOR111W | 1 | psiblast       | 1ex2A_  | 170  |
| YOR111W | YOR111W | 2 | psiblast       | 1ex2A_  | 62   |
| YOR112W | YOR112W | 1 | psiblast       | 1bmKA_  | 130  |
| YOR112W | YOR112W | 2 | psiblast       | 1bmKA_  | 194  |
| YOR112W | YOR112W | 3 | psiblast       | 1b3uA_  | 329  |
| YOR112W | YOR112W | 4 | unassigned     | na      | 108  |
| YOR113W | AZF1    | 1 | unassigned     | na      | 114  |
| YOR113W | AZF1    | 2 | msa            | na      | 148  |
| YOR113W | AZF1    | 3 | msa            | na      | 219  |
| YOR113W | AZF1    | 4 | unassigned     | na      | 52   |
| YOR113W | AZF1    | 5 | psiblast       | 1lu6A_  | 147  |
| YOR113W | AZF1    | 6 | msa            | na      | 182  |
| YOR113W | AZF1    | 7 | unassigned     | na      | 52   |
| YOR114W | YOR114W | 1 | unassigned     | na      | 294  |
| YOR115C | TRS33   | 1 | msa            | na      | 268  |
| YOR116C | RPO31   | 1 | psiblast       | 1k83A_  | 1460 |
| YOR117W | RPT5    | 1 | msa            | na      | 158  |
| YOR117W | RPT5    | 2 | psiblast       | 1e32A_  | 193  |
| YOR117W | RPT5    | 3 | psiblast       | 1e32A_  | 83   |
| YOR118W | YOR118W | 1 | unassigned     | na      | 254  |
| YOR118W | YOR118W | 2 | msa            | na      | 313  |
| YOR119C | RIO1    | 1 | psiblast       | 2ptk__  | 103  |
| YOR119C | RIO1    | 2 | psiblast       | 1a06__  | 97   |
| YOR119C | RIO1    | 3 | psiblast       | 1a06__  | 217  |
| YOR119C | RIO1    | 4 | unassigned     | na      | 67   |
| YOR120W | GCY1    | 1 | psiblast       | 2alr__  | 312  |
| YOR121C | YOR121C | 1 | unassigned     | na      | 101  |
| YOR122C | PFY1    | 1 | psiblast       | 1yprA_  | 126  |
| YOR123C | LEO1    | 1 | msa            | na      | 181  |
| YOR123C | LEO1    | 2 | unassigned     | na      | 283  |
| YOR124C | UBP2    | 1 | unassigned     | na      | 616  |
| YOR124C | UBP2    | 2 | msa            | na      | 106  |
| YOR124C | UBP2    | 3 | pfam           | PF00442 | 64   |
| YOR124C | UBP2    | 4 | unassigned     | na      | 52   |

|         |         |   |                |         |     |
|---------|---------|---|----------------|---------|-----|
| YOR124C | UBP2    | 5 | msa            | na      | 346 |
| YOR124C | UBP2    | 6 | pfam           | PF00443 | 88  |
| YOR125C | CAT5    | 1 | unassigned     | na      | 72  |
| YOR125C | CAT5    | 2 | fold_recogniti | 1jgcA   | 200 |
| YOR126C | IAH1    | 1 | psiblast       | 1es9A_  | 238 |
| YOR127W | RGA1    | 1 | psiblast       | 1b8tA_  | 70  |
| YOR127W | RGA1    | 2 | psiblast       | 1b8tA_  | 60  |
| YOR127W | RGA1    | 3 | fold_recogniti | 1ldvA   | 108 |
| YOR127W | RGA1    | 4 | fold_recogniti | 1k83A   | 378 |
| YOR127W | RGA1    | 5 | unassigned     | na      | 123 |
| YOR127W | RGA1    | 6 | psiblast       | 1am4A_  | 139 |
| YOR127W | RGA1    | 7 | psiblast       | 1am4A_  | 129 |
| YOR128C | ADE2    | 1 | psiblast       | 1b6rA_  | 122 |
| YOR128C | ADE2    | 2 | psiblast       | 1b6rA_  | 63  |
| YOR128C | ADE2    | 3 | psiblast       | 1b6rA_  | 208 |
| YOR128C | ADE2    | 4 | psiblast       | 1qczA_  | 178 |
| YOR129C | YOR129C | 1 | msa            | na      | 105 |
| YOR129C | YOR129C | 2 | unassigned     | na      | 550 |
| YOR129C | YOR129C | 3 | fold_recogniti | 1I9uD   | 238 |
| YOR130C | ORT1    | 1 | fold_recogniti | 1is2A   | 292 |
| YOR131C | YOR131C | 1 | psiblast       | 1fezA_  | 218 |
| YOR132W | VPS17   | 1 | unassigned     | na      | 71  |
| YOR132W | VPS17   | 2 | psiblast       | 1h6hA_  | 166 |
| YOR132W | VPS17   | 3 | psiblast       | 1i84S_  | 246 |
| YOR132W | VPS17   | 4 | unassigned     | na      | 68  |
| YOR134W | BAG7    | 1 | psiblast       | 1grnB_  | 145 |
| YOR134W | BAG7    | 2 | psiblast       | 1grnB_  | 141 |
| YOR134W | BAG7    | 3 | unassigned     | na      | 123 |
| YOR135C | YOR135C | 1 | unassigned     | na      | 113 |
| YOR136W | IDH2    | 1 | psiblast       | 1xac__  | 369 |
| YOR137C | SIA1    | 1 | unassigned     | na      | 281 |
| YOR137C | SIA1    | 2 | psiblast       | 1qhwA_  | 341 |
| YOR138C | RUP1    | 1 | pfam           | PF00627 | 67  |
| YOR138C | RUP1    | 2 | unassigned     | na      | 604 |
| YOR139C | YOR139C | 1 | unassigned     | na      | 130 |
| YOR140W | SFL1    | 1 | psiblast       | 1hks__  | 176 |
| YOR140W | SFL1    | 2 | msa            | na      | 118 |
| YOR140W | SFL1    | 3 | unassigned     | na      | 76  |
| YOR140W | SFL1    | 4 | fold_recogniti | 1ldvA   | 168 |
| YOR140W | SFL1    | 5 | unassigned     | na      | 69  |
| YOR140W | SFL1    | 6 | fold_recogniti | 1deqA   | 159 |
| YOR141C | ARP8    | 1 | msa            | na      | 108 |
| YOR141C | ARP8    | 2 | unassigned     | na      | 201 |
| YOR141C | ARP8    | 3 | psiblast       | 2btfA_  | 191 |
| YOR141C | ARP8    | 4 | psiblast       | 2btfA_  | 205 |
| YOR141C | ARP8    | 5 | fold_recogniti | 1k8kA   | 176 |
| YOR142W | LSC1    | 1 | psiblast       | 1eucA_  | 160 |
| YOR142W | LSC1    | 2 | psiblast       | 1eucA_  | 169 |

|         |         |   |                |         |     |
|---------|---------|---|----------------|---------|-----|
| YOR143C | THI80   | 1 | psiblast       | 1ig0A_  | 107 |
| YOR143C | THI80   | 2 | psiblast       | 1ig0A_  | 212 |
| YOR144C | ELG1    | 1 | psiblast       | 1jbkA_  | 162 |
| YOR144C | ELG1    | 2 | unassigned     | na      | 76  |
| YOR144C | ELG1    | 3 | psiblast       | 1iqpA_  | 130 |
| YOR144C | ELG1    | 4 | psiblast       | 1iqpA_  | 324 |
| YOR144C | ELG1    | 5 | unassigned     | na      | 99  |
| YOR145C | PNO1    | 1 | msa            | na      | 86  |
| YOR145C | PNO1    | 2 | psiblast       | 1j4wA_  | 95  |
| YOR145C | PNO1    | 3 | psiblast       | 1j4wA_  | 93  |
| YOR146W | YOR146W | 1 | unassigned     | na      | 101 |
| YOR147W | MDM32   | 1 | unassigned     | na      | 105 |
| YOR147W | MDM32   | 2 | msa            | na      | 437 |
| YOR147W | MDM32   | 3 | unassigned     | na      | 111 |
| YOR148C | SPP2    | 1 | unassigned     | na      | 185 |
| YOR149C | SMP3    | 1 | pfam           | PF03901 | 516 |
| YOR150W | MRPL23  | 1 | psiblast       | 1lnrH_  | 163 |
| YOR151C | RPB2    | 1 | psiblast       | 1k83B_  | 527 |
| YOR151C | RPB2    | 2 | psiblast       | 1k83B_  | 601 |
| YOR151C | RPB2    | 3 | psiblast       | 1k83B_  | 96  |
| YOR152C | YOR152C | 1 | unassigned     | na      | 256 |
| YOR153W | PDR5    | 1 | unassigned     | na      | 97  |
| YOR153W | PDR5    | 2 | psiblast       | 1l2tA_  | 331 |
| YOR153W | PDR5    | 3 | unassigned     | na      | 65  |
| YOR153W | PDR5    | 4 | psiblast       | 1jsqA_  | 336 |
| YOR153W | PDR5    | 5 | psiblast       | 1jsqA_  | 290 |
| YOR153W | PDR5    | 6 | msa            | na      | 301 |
| YOR153W | PDR5    | 7 | unassigned     | na      | 91  |
| YOR154W | YOR154W | 1 | unassigned     | na      | 110 |
| YOR154W | YOR154W | 2 | msa            | na      | 407 |
| YOR154W | YOR154W | 3 | unassigned     | na      | 70  |
| YOR155C | ISN1    | 1 | unassigned     | na      | 450 |
| YOR156C | NFI1    | 1 | pfam           | PF02037 | 96  |
| YOR156C | NFI1    | 2 | unassigned     | na      | 229 |
| YOR156C | NFI1    | 3 | pfam           | PF02891 | 62  |
| YOR156C | NFI1    | 4 | fold_recogniti | 1k83A   | 339 |
| YOR157C | PUP1    | 1 | psiblast       | 1fntI_  | 261 |
| YOR158W | PET123  | 1 | unassigned     | na      | 66  |
| YOR158W | PET123  | 2 | msa            | na      | 158 |
| YOR158W | PET123  | 3 | unassigned     | na      | 94  |
| YOR159C | SME1    | 1 | psiblast       | 1jriA_  | 94  |
| YOR160W | MTR10   | 1 | msa            | na      | 642 |
| YOR160W | MTR10   | 2 | msa            | na      | 330 |
| YOR161C | PNS1    | 1 | unassigned     | na      | 257 |
| YOR161C | PNS1    | 2 | msa            | na      | 111 |
| YOR161C | PNS1    | 3 | msa            | na      | 171 |
| YOR162C | YRR1    | 1 | psiblast       | 1hwtD_  | 141 |
| YOR162C | YRR1    | 2 | unassigned     | na      | 108 |

|         |         |   |                |         |     |
|---------|---------|---|----------------|---------|-----|
| YOR162C | YRR1    | 3 | msa            | na      | 332 |
| YOR162C | YRR1    | 4 | msa            | na      | 229 |
| YOR163W | DDP1    | 1 | psiblast       | 1f3yA_  | 188 |
| YOR164C | YOR164C | 1 | fold_recogniti | 1qqeA   | 131 |
| YOR164C | YOR164C | 2 | fold_recogniti | 1qqeA   | 181 |
| YOR165W | SEY1    | 1 | psiblast       | 1dg3A_  | 148 |
| YOR165W | SEY1    | 2 | fold_recogniti | 1n1bA   | 135 |
| YOR165W | SEY1    | 3 | fold_recogniti | 1n1bA   | 350 |
| YOR165W | SEY1    | 4 | unassigned     | na      | 143 |
| YOR166C | YOR166C | 1 | unassigned     | na      | 112 |
| YOR166C | YOR166C | 2 | msa            | na      | 205 |
| YOR166C | YOR166C | 3 | unassigned     | na      | 141 |
| YOR167C | RPS28A  | 1 | pfam           | PF01200 | 67  |
| YOR168W | GLN4    | 1 | unassigned     | na      | 198 |
| YOR168W | GLN4    | 2 | psiblast       | 1qrtA_  | 290 |
| YOR168W | GLN4    | 3 | psiblast       | 1qrtA_  | 94  |
| YOR168W | GLN4    | 4 | psiblast       | 1qrtA_  | 227 |
| YOR169C | YOR169C | 1 | unassigned     | na      | 154 |
| YOR170W | YOR170W | 1 | unassigned     | na      | 101 |
| YOR171C | LCB4    | 1 | unassigned     | na      | 160 |
| YOR171C | LCB4    | 2 | fold_recogniti | 1kq3A   | 207 |
| YOR171C | LCB4    | 3 | unassigned     | na      | 61  |
| YOR171C | LCB4    | 4 | msa            | na      | 196 |
| YOR172W | YRM1    | 1 | psiblast       | 1hwtD_  | 100 |
| YOR172W | YRM1    | 2 | msa            | na      | 456 |
| YOR172W | YRM1    | 3 | msa            | na      | 230 |
| YOR173W | DCS2    | 1 | unassigned     | na      | 397 |
| YOR174W | MED4    | 1 | unassigned     | na      | 64  |
| YOR174W | MED4    | 2 | msa            | na      | 220 |
| YOR175C | YOR175C | 1 | msa            | na      | 143 |
| YOR175C | YOR175C | 2 | pfam           | PF03062 | 369 |
| YOR175C | YOR175C | 3 | unassigned     | na      | 107 |
| YOR176W | HEM15   | 1 | psiblast       | 1hrkA_  | 201 |
| YOR176W | HEM15   | 2 | psiblast       | 1hrkA_  | 192 |
| YOR177C | MPC54   | 1 | psiblast       | 1i84S_  | 407 |
| YOR177C | MPC54   | 2 | unassigned     | na      | 57  |
| YOR178C | GAC1    | 1 | unassigned     | na      | 171 |
| YOR178C | GAC1    | 2 | pfam           | PF03370 | 221 |
| YOR178C | GAC1    | 3 | unassigned     | na      | 401 |
| YOR179C | SYC1    | 1 | unassigned     | na      | 188 |
| YOR180C | DCI1    | 1 | psiblast       | 1hnoA_  | 271 |
| YOR181W | LAS17   | 1 | pfam           | PF00568 | 154 |
| YOR181W | LAS17   | 2 | msa            | na      | 272 |
| YOR181W | LAS17   | 3 | fold_recogniti | 1deqA   | 207 |
| YOR183W | FYV12   | 1 | unassigned     | na      | 129 |
| YOR184W | SER1    | 1 | psiblast       | 1bjoA_  | 112 |
| YOR184W | SER1    | 2 | psiblast       | 1bjoA_  | 283 |
| YOR185C | GSP2    | 1 | psiblast       | 1a2kC_  | 220 |

|         |         |   |                |         |      |
|---------|---------|---|----------------|---------|------|
| YOR186W | YOR186W | 1 | unassigned     | na      | 144  |
| YOR187W | TUF1    | 1 | psiblast       | 1b23P_  | 239  |
| YOR187W | TUF1    | 2 | psiblast       | 1b23P_  | 198  |
| YOR188W | MSB1    | 1 | unassigned     | na      | 1137 |
| YOR189W | IES4    | 1 | unassigned     | na      | 116  |
| YOR190W | SPR1    | 1 | psiblast       | 1cz1A_  | 329  |
| YOR190W | SPR1    | 2 | psiblast       | 1cz1A_  | 116  |
| YOR191W | RIS1    | 1 | unassigned     | na      | 91   |
| YOR191W | RIS1    | 2 | psiblast       | 1i84S_  | 347  |
| YOR191W | RIS1    | 3 | msa            | na      | 194  |
| YOR191W | RIS1    | 4 | unassigned     | na      | 125  |
| YOR191W | RIS1    | 5 | msa            | na      | 670  |
| YOR191W | RIS1    | 6 | msa            | na      | 192  |
| YOR192C | YOR192C | 1 | pfam           | PF02133 | 547  |
| YOR192C | YOR192C | 2 | unassigned     | na      | 52   |
| YOR193W | PEX27   | 1 | unassigned     | na      | 75   |
| YOR193W | PEX27   | 2 | msa            | na      | 301  |
| YOR194C | TOA1    | 1 | psiblast       | 1ytfB_  | 88   |
| YOR194C | TOA1    | 2 | unassigned     | na      | 121  |
| YOR194C | TOA1    | 3 | psiblast       | 1ytfC_  | 77   |
| YOR195W | SLK19   | 1 | psiblast       | 1i84S_  | 458  |
| YOR195W | SLK19   | 2 | psiblast       | 2tmaA_  | 94   |
| YOR195W | SLK19   | 3 | psiblast       | 2tmaA_  | 103  |
| YOR195W | SLK19   | 4 | msa            | na      | 166  |
| YOR196C | LIP5    | 1 | msa            | na      | 177  |
| YOR196C | LIP5    | 2 | fold_recogniti | 1o0yA   | 237  |
| YOR197W | MCA1    | 1 | fold_recogniti | 1m2vB   | 100  |
| YOR197W | MCA1    | 2 | fold_recogniti | 1cp3A   | 353  |
| YOR198C | BFR1    | 1 | psiblast       | 1i84S_  | 323  |
| YOR198C | BFR1    | 2 | msa            | na      | 147  |
| YOR199W | YOR199W | 1 | unassigned     | na      | 109  |
| YOR200W | YOR200W | 1 | unassigned     | na      | 132  |
| YOR201C | PET56   | 1 | msa            | na      | 85   |
| YOR201C | PET56   | 2 | psiblast       | 1ipaA_  | 145  |
| YOR201C | PET56   | 3 | psiblast       | 1ipaA_  | 182  |
| YOR202W | HIS3    | 1 | pfam           | PF00475 | 220  |
| YOR203W | YOR203W | 1 | unassigned     | na      | 117  |
| YOR204W | DED1    | 1 | fold_recogniti | 1deqA   | 142  |
| YOR204W | DED1    | 2 | psiblast       | 1hv8A_  | 227  |
| YOR204W | DED1    | 3 | psiblast       | 1hv8A_  | 175  |
| YOR204W | DED1    | 4 | unassigned     | na      | 60   |
| YOR205C | FMP38   | 1 | psiblast       | 1egaA_  | 224  |
| YOR205C | FMP38   | 2 | msa            | na      | 332  |
| YOR206W | NOC2    | 1 | msa            | na      | 251  |
| YOR206W | NOC2    | 2 | unassigned     | na      | 175  |
| YOR206W | NOC2    | 3 | msa            | na      | 284  |
| YOR207C | RET1    | 1 | psiblast       | 1k83B_  | 470  |
| YOR207C | RET1    | 2 | psiblast       | 1k83B_  | 590  |

|         |         |   |                |         |     |
|---------|---------|---|----------------|---------|-----|
| YOR207C | RET1    | 3 | psiblast       | 1k83B_  | 89  |
| YOR208W | PTP2    | 1 | unassigned     | na      | 200 |
| YOR208W | PTP2    | 2 | psiblast       | 1larA_  | 550 |
| YOR209C | NPT1    | 1 | msa            | na      | 183 |
| YOR209C | NPT1    | 2 | msa            | na      | 246 |
| YOR210W | RPB10   | 1 | psiblast       | 1k83J_  | 70  |
| YOR211C | MGM1    | 1 | msa            | na      | 184 |
| YOR211C | MGM1    | 2 | psiblast       | 1jwyB_  | 326 |
| YOR211C | MGM1    | 3 | fold_recogniti | 1b89A   | 392 |
| YOR212W | STE4    | 1 | psiblast       | 1scgB_  | 423 |
| YOR213C | SAS5    | 1 | pfam           | PF03366 | 179 |
| YOR213C | SAS5    | 2 | unassigned     | na      | 69  |
| YOR214C | YOR214C | 1 | unassigned     | na      | 236 |
| YOR215C | YOR215C | 1 | fold_recogniti | 1egyA   | 185 |
| YOR216C | RUD3    | 1 | psiblast       | 1i84S_  | 217 |
| YOR216C | RUD3    | 2 | psiblast       | 2tmaA_  | 52  |
| YOR216C | RUD3    | 3 | psiblast       | 2tmaA_  | 82  |
| YOR216C | RUD3    | 4 | psiblast       | 2tmaA_  | 62  |
| YOR216C | RUD3    | 5 | psiblast       | 2tmaA_  | 71  |
| YOR217W | RFC1    | 1 | psiblast       | 1e32A_  | 196 |
| YOR217W | RFC1    | 2 | psiblast       | 1e32A_  | 84  |
| YOR217W | RFC1    | 3 | psiblast       | 1iqpA_  | 85  |
| YOR217W | RFC1    | 4 | psiblast       | 1iqpA_  | 298 |
| YOR217W | RFC1    | 5 | unassigned     | na      | 198 |
| YOR218C | YOR218C | 1 | unassigned     | na      | 139 |
| YOR219C | STE13   | 1 | msa            | na      | 114 |
| YOR219C | STE13   | 2 | msa            | na      | 101 |
| YOR219C | STE13   | 3 | psiblast       | 1c5kA_  | 92  |
| YOR219C | STE13   | 4 | psiblast       | 1qfsA_  | 320 |
| YOR219C | STE13   | 5 | psiblast       | 1qfsA_  | 304 |
| YOR220W | YOR220W | 1 | unassigned     | na      | 265 |
| YOR221C | MCT1    | 1 | psiblast       | 1mla__  | 384 |
| YOR222W | ODC2    | 1 | fold_recogniti | 1is2A   | 307 |
| YOR223W | YOR223W | 1 | unassigned     | na      | 292 |
| YOR224C | RPB8    | 1 | psiblast       | 1a1d__  | 146 |
| YOR225W | YOR225W | 1 | unassigned     | na      | 109 |
| YOR226C | ISU2    | 1 | pfam           | PF01592 | 156 |
| YOR227W | YOR227W | 1 | fold_recogniti | 1deqA   | 223 |
| YOR227W | YOR227W | 2 | unassigned     | na      | 69  |
| YOR227W | YOR227W | 3 | msa            | na      | 221 |
| YOR227W | YOR227W | 4 | psiblast       | 2bnh__  | 84  |
| YOR227W | YOR227W | 5 | psiblast       | 2bnh__  | 42  |
| YOR227W | YOR227W | 6 | psiblast       | 2bnh__  | 230 |
| YOR227W | YOR227W | 7 | psiblast       | 1jl5A_  | 97  |
| YOR227W | YOR227W | 8 | fold_recogniti | 1l2qA   | 280 |
| YOR228C | YOR228C | 1 | unassigned     | na      | 302 |
| YOR229W | WTM2    | 1 | unassigned     | na      | 112 |
| YOR229W | WTM2    | 2 | psiblast       | 1gg2B_  | 355 |



|           |         |   |                |         |     |
|-----------|---------|---|----------------|---------|-----|
| YOR230W   | WTM1    | 1 | unassigned     | na      | 74  |
| YOR230W   | WTM1    | 2 | psiblast       | 1gg2B_  | 363 |
| YOR231W   | MKK1    | 1 | psiblast       | 1f3mA_  | 83  |
| YOR231W   | MKK1    | 2 | unassigned     | na      | 69  |
| YOR231W   | MKK1    | 3 | psiblast       | 1f3mC_  | 149 |
| YOR231W   | MKK1    | 4 | psiblast       | 1f3mC_  | 207 |
| YOR232W   | MGE1    | 1 | psiblast       | 1dkgA_  | 170 |
| YOR232W   | MGE1    | 2 | psiblast       | 1dkgA_  | 58  |
| YOR233W   | KIN4    | 1 | psiblast       | 1fotA_  | 191 |
| YOR233W   | KIN4    | 2 | psiblast       | 1fotA_  | 225 |
| YOR233W   | KIN4    | 3 | unassigned     | na      | 384 |
| YOR234C   | RPL33B  | 1 | pfam           | PF01247 | 107 |
| YOR235W   | YOR235W | 1 | unassigned     | na      | 104 |
| YOR236W   | DFR1    | 1 | psiblast       | 1ai9A_  | 211 |
| YOR237W   | HES1    | 1 | pfam           | PF01237 | 434 |
| YOR238W   | YOR238W | 1 | unassigned     | na      | 306 |
| YOR239W   | ABP140  | 1 | fold_recogniti | 1I8mA   | 72  |
| YOR239W   | ABP140  | 2 | fold_recogniti | 1I8mA   | 79  |
| YOR239W   | ABP140  | 3 | fold_recogniti | 1I8mA   | 70  |
| YOR239W   | ABP140  | 4 | fold_recogniti | 1I8mA   | 58  |
| YOR239W-A | 5745    | 1 | psiblast       | 2tmaA_  | 60  |
| YOR239W-A | 5745    | 2 | psiblast       | 1i84S_  | 357 |
| YOR239W-A | 5745    | 3 | psiblast       | 1im8A_  | 128 |
| YOR239W-A | 5745    | 4 | psiblast       | 1hnnA_  | 83  |
| YOR240W   | 5746    | 1 | psiblast       | 1amuA_  | 71  |
| YOR240W   | 5746    | 2 | psiblast       | 1kp9A_  | 291 |
| YOR241W   | MET7    | 1 | unassigned     | na      | 97  |
| YOR241W   | MET7    | 2 | psiblast       | 1fgs__  | 282 |
| YOR241W   | MET7    | 3 | psiblast       | 1fgs__  | 169 |
| YOR242C   | SSP2    | 1 | unassigned     | na      | 154 |
| YOR242C   | SSP2    | 2 | psiblast       | 1cvjA_  | 98  |
| YOR242C   | SSP2    | 3 | psiblast       | 1cvjA_  | 119 |
| YOR243C   | PUS7    | 1 | unassigned     | na      | 117 |
| YOR243C   | PUS7    | 2 | pfam           | PF01142 | 490 |
| YOR243C   | PUS7    | 3 | unassigned     | na      | 69  |
| YOR244W   | ESA1    | 1 | fold_recogniti | 1ap0_   | 141 |
| YOR244W   | ESA1    | 2 | psiblast       | 1fy7A_  | 77  |
| YOR244W   | ESA1    | 3 | psiblast       | 1fy7A_  | 96  |
| YOR244W   | ESA1    | 4 | psiblast       | 1fy7A_  | 61  |
| YOR244W   | ESA1    | 5 | psiblast       | 1fy7A_  | 70  |
| YOR245C   | DGA1    | 1 | unassigned     | na      | 144 |
| YOR245C   | DGA1    | 2 | msa            | na      | 274 |
| YOR246C   | YOR246C | 1 | psiblast       | 1cydA_  | 330 |
| YOR247W   | SRL1    | 1 | unassigned     | na      | 210 |
| YOR248W   | YOR248W | 1 | unassigned     | na      | 100 |
| YOR249C   | APC5    | 1 | msa            | na      | 223 |
| YOR249C   | APC5    | 2 | unassigned     | na      | 59  |
| YOR249C   | APC5    | 3 | fold_recogniti | 1hz4A   | 103 |

|         |         |   |                |         |     |
|---------|---------|---|----------------|---------|-----|
| YOR249C | APC5    | 4 | fold_recogniti | 1hz4A   | 127 |
| YOR249C | APC5    | 5 | fold_recogniti | 1hz4A   | 173 |
| YOR250C | CLP1    | 1 | psiblast       | 1jppA_  | 106 |
| YOR250C | CLP1    | 2 | psiblast       | 1jppA_  | 256 |
| YOR250C | CLP1    | 3 | msa            | na      | 83  |
| YOR251C | YOR251C | 1 | psiblast       | 1rhd__  | 158 |
| YOR251C | YOR251C | 2 | psiblast       | 1rhd__  | 146 |
| YOR252W | YOR252W | 1 | unassigned     | na      | 141 |
| YOR253W | NAT5    | 1 | psiblast       | 1bo4A_  | 176 |
| YOR254C | SEC63   | 1 | unassigned     | na      | 116 |
| YOR254C | SEC63   | 2 | psiblast       | 1xbl__  | 125 |
| YOR254C | SEC63   | 3 | msa            | na      | 422 |
| YOR255W | OSW1    | 1 | unassigned     | na      | 278 |
| YOR256C | YOR256C | 1 | unassigned     | na      | 151 |
| YOR256C | YOR256C | 2 | psiblast       | 1de4C_  | 318 |
| YOR256C | YOR256C | 3 | psiblast       | 1de4C_  | 340 |
| YOR257W | CDC31   | 1 | psiblast       | 1iq5A_  | 89  |
| YOR257W | CDC31   | 2 | psiblast       | 1iq5A_  | 72  |
| YOR258W | HNT3    | 1 | fold_recogniti | 1av5A   | 161 |
| YOR258W | HNT3    | 2 | unassigned     | na      | 56  |
| YOR259C | RPT4    | 1 | psiblast       | 1e32A_  | 94  |
| YOR259C | RPT4    | 2 | psiblast       | 1e32A_  | 83  |
| YOR259C | RPT4    | 3 | psiblast       | 1e32A_  | 174 |
| YOR259C | RPT4    | 4 | psiblast       | 1e32A_  | 86  |
| YOR260W | GCD1    | 1 | psiblast       | 1hv9A_  | 345 |
| YOR260W | GCD1    | 2 | psiblast       | 1hv9A_  | 233 |
| YOR261C | RPN8    | 1 | pfam           | PF01398 | 125 |
| YOR261C | RPN8    | 2 | msa            | na      | 213 |
| YOR262W | YOR262W | 1 | psiblast       | 1fts__  | 200 |
| YOR262W | YOR262W | 2 | unassigned     | na      | 147 |
| YOR263C | YOR263C | 1 | unassigned     | na      | 135 |
| YOR264W | DSE3    | 1 | unassigned     | na      | 430 |
| YOR265W | RBL2    | 1 | psiblast       | 1qsdA_  | 106 |
| YOR266W | PNT1    | 1 | unassigned     | na      | 423 |
| YOR267C | HRK1    | 1 | unassigned     | na      | 181 |
| YOR267C | HRK1    | 2 | psiblast       | 1aq1__  | 117 |
| YOR267C | HRK1    | 3 | psiblast       | 1aq1__  | 124 |
| YOR267C | HRK1    | 4 | psiblast       | 1aq1__  | 52  |
| YOR267C | HRK1    | 5 | psiblast       | 1aq1__  | 63  |
| YOR267C | HRK1    | 6 | unassigned     | na      | 222 |
| YOR268C | YOR268C | 1 | unassigned     | na      | 132 |
| YOR269W | PAC1    | 1 | psiblast       | 1gxrA_  | 153 |
| YOR269W | PAC1    | 2 | psiblast       | 1erjA_  | 341 |
| YOR270C | VPH1    | 1 | psiblast       | 1i84S_  | 371 |
| YOR270C | VPH1    | 2 | msa            | na      | 469 |
| YOR271C | YOR271C | 1 | pfam           | PF03820 | 327 |
| YOR272W | YTM1    | 1 | psiblast       | 1gg2B_  | 404 |
| YOR272W | YTM1    | 2 | psiblast       | 1erjA_  | 56  |

|         |         |   |                |         |     |
|---------|---------|---|----------------|---------|-----|
| YOR273C | TPO4    | 1 | unassigned     | na      | 67  |
| YOR273C | TPO4    | 2 | psiblast       | 1ja5A_  | 412 |
| YOR273C | TPO4    | 3 | psiblast       | 1ja5A_  | 128 |
| YOR273C | TPO4    | 4 | unassigned     | na      | 52  |
| YOR274W | MOD5    | 1 | fold_recogniti | 1iqpA   | 128 |
| YOR274W | MOD5    | 2 | fold_recogniti | 1iqpA   | 67  |
| YOR274W | MOD5    | 3 | fold_recogniti | 1iqpA   | 110 |
| YOR274W | MOD5    | 4 | unassigned     | na      | 123 |
| YOR275C | RIM20   | 1 | pfam           | PF03097 | 148 |
| YOR275C | RIM20   | 2 | psiblast       | 1i84S_  | 320 |
| YOR275C | RIM20   | 3 | psiblast       | 1c1gA_  | 193 |
| YOR276W | CAF20   | 1 | unassigned     | na      | 161 |
| YOR277C | YOR277C | 1 | unassigned     | na      | 102 |
| YOR278W | HEM4    | 1 | psiblast       | 1jr2A_  | 136 |
| YOR278W | HEM4    | 2 | psiblast       | 1jr2A_  | 139 |
| YOR279C | RFM1    | 1 | unassigned     | na      | 68  |
| YOR279C | RFM1    | 2 | fold_recogniti | 1ej6B   | 242 |
| YOR280C | FSH3    | 1 | psiblast       | 1fj2A_  | 266 |
| YOR281C | PLP2    | 1 | psiblast       | 1a0rP_  | 237 |
| YOR281C | PLP2    | 2 | psiblast       | 1bjx__  | 49  |
| YOR282W | YOR282W | 1 | unassigned     | na      | 106 |
| YOR283W | YOR283W | 1 | psiblast       | 1ljdA_  | 230 |
| YOR284W | HUA2    | 1 | unassigned     | na      | 243 |
| YOR285W | YOR285W | 1 | psiblast       | 1h4kX_  | 139 |
| YOR286W | FMP31   | 1 | psiblast       | 1orb__  | 149 |
| YOR287C | YOR287C | 1 | fold_recogniti | 1c1gB   | 300 |
| YOR288C | MPD1    | 1 | psiblast       | 1mek__  | 156 |
| YOR288C | MPD1    | 2 | psiblast       | 1bjx__  | 162 |
| YOR289W | YOR289W | 1 | pfam           | PF01871 | 251 |
| YOR290C | SNF2    | 1 | msa            | na      | 404 |
| YOR290C | SNF2    | 2 | unassigned     | na      | 304 |
| YOR290C | SNF2    | 3 | psiblast       | 1gm5A_  | 254 |
| YOR290C | SNF2    | 4 | unassigned     | na      | 52  |
| YOR290C | SNF2    | 5 | psiblast       | 1hv8A_  | 72  |
| YOR290C | SNF2    | 6 | psiblast       | 1d9xA_  | 261 |
| YOR290C | SNF2    | 7 | unassigned     | na      | 163 |
| YOR290C | SNF2    | 8 | psiblast       | 1e6iA_  | 193 |
| YOR291W | YOR291W | 1 | unassigned     | na      | 414 |
| YOR291W | YOR291W | 2 | psiblast       | 1eulA_  | 198 |
| YOR291W | YOR291W | 3 | psiblast       | 1eulA_  | 364 |
| YOR291W | YOR291W | 4 | psiblast       | 1eulA_  | 254 |
| YOR291W | YOR291W | 5 | psiblast       | 1eulA_  | 242 |
| YOR292C | YOR292C | 1 | unassigned     | na      | 163 |
| YOR292C | YOR292C | 2 | msa            | na      | 146 |
| YOR293W | RPS10A  | 1 | pfam           | PF03501 | 105 |
| YOR294W | RRS1    | 1 | msa            | na      | 135 |
| YOR294W | RRS1    | 2 | unassigned     | na      | 68  |
| YOR295W | UAF30   | 1 | msa            | na      | 99  |

|           |           |   |                |         |     |
|-----------|-----------|---|----------------|---------|-----|
| YOR295W   | UAF30     | 2 | pfam           | PF02201 | 129 |
| YOR296W   | YOR296W   | 1 | unassigned     | na      | 224 |
| YOR296W   | YOR296W   | 2 | fold_recogniti | 1n1bA   | 296 |
| YOR296W   | YOR296W   | 3 | fold_recogniti | 1n1bA   | 81  |
| YOR296W   | YOR296W   | 4 | fold_recogniti | 1n1bA   | 119 |
| YOR296W   | YOR296W   | 5 | psiblast       | 1dqvA_  | 118 |
| YOR296W   | YOR296W   | 6 | psiblast       | 1dqvA_  | 194 |
| YOR296W   | YOR296W   | 7 | unassigned     | na      | 257 |
| YOR297C   | TIM18     | 1 | unassigned     | na      | 192 |
| YOR298C-A | MBF1      | 1 | fold_recogniti | 1b0nA   | 58  |
| YOR298W   | YOR298W   | 1 | unassigned     | na      | 479 |
| YOR299W   | BUD7      | 1 | unassigned     | na      | 363 |
| YOR299W   | BUD7      | 2 | psiblast       | 1na3A_  | 109 |
| YOR299W   | BUD7      | 3 | msa            | na      | 274 |
| YOR300W   | YOR300W   | 1 | unassigned     | na      | 102 |
| YOR302W   | YOR302W   | 1 | unassigned     | na      | 25  |
| YOR303W   | CPA1      | 1 | psiblast       | 1bxrB_  | 158 |
| YOR303W   | CPA1      | 2 | psiblast       | 1bxrB_  | 253 |
| YOR304C-A | YOR304C-A | 1 | unassigned     | na      | 76  |
| YOR304W   | ISW2      | 1 | msa            | na      | 170 |
| YOR304W   | ISW2      | 2 | pfam           | PF00176 | 262 |
| YOR304W   | ISW2      | 3 | psiblast       | 1hv8A_  | 62  |
| YOR304W   | ISW2      | 4 | psiblast       | 1d9xA_  | 228 |
| YOR304W   | ISW2      | 5 | msa            | na      | 167 |
| YOR304W   | ISW2      | 6 | msa            | na      | 231 |
| YOR305W   | YOR305W   | 1 | unassigned     | na      | 242 |
| YOR306C   | MCH5      | 1 | unassigned     | na      | 82  |
| YOR306C   | MCH5      | 2 | pfam           | PF00083 | 439 |
| YOR307C   | SLY41     | 1 | unassigned     | na      | 108 |
| YOR307C   | SLY41     | 2 | msa            | na      | 345 |
| YOR308C   | SNU66     | 1 | psiblast       | 1i84S_  | 411 |
| YOR308C   | SNU66     | 2 | msa            | na      | 176 |
| YOR309C   | YOR309C   | 1 | unassigned     | na      | 126 |
| YOR310C   | NOP58     | 1 | fold_recogniti | 1n1bA   | 383 |
| YOR310C   | NOP58     | 2 | psiblast       | 1i84S_  | 128 |
| YOR311C   | HSD1      | 1 | unassigned     | na      | 75  |
| YOR311C   | HSD1      | 2 | pfam           | PF01879 | 215 |
| YOR312C   | RPL20B    | 1 | pfam           | PF01775 | 174 |
| YOR313C   | SPS4      | 1 | unassigned     | na      | 338 |
| YOR314W   | YOR314W   | 1 | unassigned     | na      | 109 |
| YOR314W-A | YOR314W-A | 1 | unassigned     | na      | 36  |
| YOR315W   | YOR315W   | 1 | unassigned     | na      | 346 |
| YOR316C   | COT1      | 1 | pfam           | PF01545 | 439 |
| YOR317W   | FAA1      | 1 | unassigned     | na      | 79  |
| YOR317W   | FAA1      | 2 | psiblast       | 1ba3__  | 174 |
| YOR317W   | FAA1      | 3 | psiblast       | 1ba3__  | 301 |
| YOR317W   | FAA1      | 4 | psiblast       | 1ba3__  | 146 |
| YOR318C   | YOR318C   | 1 | unassigned     | na      | 101 |

|         |         |    |            |         |     |
|---------|---------|----|------------|---------|-----|
| YOR319W | HSH49   | 1  | psiblast   | 1cvjA_  | 88  |
| YOR319W | HSH49   | 2  | psiblast   | 1cvjA_  | 125 |
| YOR320C | GNT1    | 1  | unassigned | na      | 82  |
| YOR320C | GNT1    | 2  | psiblast   | 1II0A_  | 258 |
| YOR320C | GNT1    | 3  | unassigned | na      | 151 |
| YOR322C | YOR322C | 1  | unassigned | na      | 79  |
| YOR322C | YOR322C | 2  | msa        | na      | 308 |
| YOR322C | YOR322C | 3  | unassigned | na      | 431 |
| YOR323C | PRO2    | 1  | psiblast   | 1o20A_  | 292 |
| YOR323C | PRO2    | 2  | psiblast   | 1o20A_  | 164 |
| YOR324C | FRT1    | 1  | unassigned | na      | 154 |
| YOR324C | FRT1    | 2  | psiblast   | 1i84S_  | 448 |
| YOR325W | YOR325W | 1  | unassigned | na      | 157 |
| YOR326W | MYO2    | 1  | psiblast   | 1jwyA_  | 63  |
| YOR326W | MYO2    | 2  | psiblast   | 1jwyA_  | 360 |
| YOR326W | MYO2    | 3  | psiblast   | 1jwyA_  | 264 |
| YOR326W | MYO2    | 4  | psiblast   | 1jwyA_  | 96  |
| YOR326W | MYO2    | 5  | psiblast   | 1wdcA_  | 61  |
| YOR326W | MYO2    | 6  | psiblast   | 1cii__  | 165 |
| YOR326W | MYO2    | 7  | psiblast   | 1cii__  | 318 |
| YOR326W | MYO2    | 8  | unassigned | na      | 53  |
| YOR326W | MYO2    | 9  | pfam       | PF01843 | 129 |
| YOR326W | MYO2    | 10 | unassigned | na      | 65  |
| YOR327C | SNC2    | 1  | psiblast   | 1kila_  | 115 |
| YOR328W | PDR10   | 1  | unassigned | na      | 111 |
| YOR328W | PDR10   | 2  | psiblast   | 1mt0A_  | 124 |
| YOR328W | PDR10   | 3  | psiblast   | 1mt0A_  | 215 |
| YOR328W | PDR10   | 4  | msa        | na      | 261 |
| YOR328W | PDR10   | 5  | unassigned | na      | 173 |
| YOR328W | PDR10   | 6  | psiblast   | 1I2tA_  | 289 |
| YOR328W | PDR10   | 7  | msa        | na      | 302 |
| YOR328W | PDR10   | 8  | unassigned | na      | 89  |
| YOR329C | SCD5    | 1  | unassigned | na      | 205 |
| YOR329C | SCD5    | 2  | msa        | na      | 330 |
| YOR329C | SCD5    | 3  | psiblast   | 1m2vB_  | 177 |
| YOR329C | SCD5    | 4  | unassigned | na      | 160 |
| YOR330C | MIP1    | 1  | msa        | na      | 241 |
| YOR330C | MIP1    | 2  | unassigned | na      | 152 |
| YOR330C | MIP1    | 3  | psiblast   | 1d8yA_  | 289 |
| YOR330C | MIP1    | 4  | psiblast   | 1d8yA_  | 257 |
| YOR330C | MIP1    | 5  | psiblast   | 1d8yA_  | 72  |
| YOR330C | MIP1    | 6  | msa        | na      | 269 |
| YOR331C | YOR331C | 1  | unassigned | na      | 185 |
| YOR332W | VMA4    | 1  | pfam       | PF01991 | 233 |
| YOR333C | YOR333C | 1  | unassigned | na      | 138 |
| YOR335C | ALA1    | 1  | pfam       | PF01411 | 570 |
| YOR335C | ALA1    | 2  | psiblast   | 1qf6A_  | 319 |
| YOR335C | ALA1    | 3  | msa        | na      | 69  |

|         |         |   |            |        |      |
|---------|---------|---|------------|--------|------|
| YOR336W | KRE5    | 1 | msa        | na     | 284  |
| YOR336W | KRE5    | 2 | unassigned | na     | 477  |
| YOR336W | KRE5    | 3 | msa        | na     | 266  |
| YOR336W | KRE5    | 4 | unassigned | na     | 61   |
| YOR336W | KRE5    | 5 | psiblast   | 1g9rA_ | 277  |
| YOR337W | TEA1    | 1 | psiblast   | 1pyiA_ | 176  |
| YOR337W | TEA1    | 2 | unassigned | na     | 65   |
| YOR337W | TEA1    | 3 | msa        | na     | 518  |
| YOR338W | YOR338W | 1 | msa        | na     | 96   |
| YOR338W | YOR338W | 2 | msa        | na     | 267  |
| YOR339C | UBC11   | 1 | psiblast   | 2e2c__ | 156  |
| YOR340C | RPA43   | 1 | msa        | na     | 183  |
| YOR340C | RPA43   | 2 | unassigned | na     | 143  |
| YOR341W | RPA190  | 1 | msa        | na     | 103  |
| YOR341W | RPA190  | 2 | psiblast   | 1i3qA_ | 1561 |
| YOR342C | YOR342C | 1 | unassigned | na     | 319  |
| YOR343C | YOR343C | 1 | unassigned | na     | 108  |
| YOR344C | TYE7    | 1 | msa        | na     | 177  |
| YOR344C | TYE7    | 2 | psiblast   | 1am9A_ | 114  |
| YOR345C | YOR345C | 1 | unassigned | na     | 116  |
| YOR346W | REV1    | 1 | unassigned | na     | 103  |
| YOR346W | REV1    | 2 | psiblast   | 1n5oX_ | 148  |
| YOR346W | REV1    | 3 | unassigned | na     | 91   |
| YOR346W | REV1    | 4 | psiblast   | 1jxIA_ | 122  |
| YOR346W | REV1    | 5 | psiblast   | 1jxIA_ | 155  |
| YOR346W | REV1    | 6 | psiblast   | 1jxIA_ | 188  |
| YOR346W | REV1    | 7 | unassigned | na     | 178  |
| YOR347C | PYK2    | 1 | psiblast   | 1a3wA_ | 266  |
| YOR347C | PYK2    | 2 | psiblast   | 1a3wA_ | 240  |
| YOR349W | CIN1    | 1 | unassigned | na     | 180  |
| YOR349W | CIN1    | 2 | msa        | na     | 272  |
| YOR349W | CIN1    | 3 | unassigned | na     | 293  |
| YOR349W | CIN1    | 4 | msa        | na     | 269  |
| YOR350C | MNE1    | 1 | msa        | na     | 240  |
| YOR350C | MNE1    | 2 | unassigned | na     | 423  |
| YOR351C | MEK1    | 1 | psiblast   | 1gxcA_ | 138  |
| YOR351C | MEK1    | 2 | psiblast   | 1a06__ | 133  |
| YOR351C | MEK1    | 3 | psiblast   | 1a06__ | 226  |
| YOR352W | YOR352W | 1 | unassigned | na     | 343  |
| YOR353C | SOG2    | 1 | psiblast   | 1k14A_ | 199  |
| YOR353C | SOG2    | 2 | psiblast   | 1dceA_ | 117  |
| YOR353C | SOG2    | 3 | unassigned | na     | 475  |
| YOR354C | MSC6    | 1 | unassigned | na     | 692  |
| YOR355W | GDS1    | 1 | unassigned | na     | 129  |
| YOR355W | GDS1    | 2 | msa        | na     | 393  |
| YOR356W | YOR356W | 1 | psiblast   | 1cc4A_ | 298  |
| YOR356W | YOR356W | 2 | psiblast   | 1cc4A_ | 201  |
| YOR356W | YOR356W | 3 | msa        | na     | 132  |

|         |         |   |            |        |     |
|---------|---------|---|------------|--------|-----|
| YOR357C | GRD19   | 1 | psiblast   | 1h6hA_ | 162 |
| YOR358W | HAP5    | 1 | msa        | na     | 142 |
| YOR358W | HAP5    | 2 | psiblast   | 1n1jB_ | 100 |
| YOR359W | VTS1    | 1 | msa        | na     | 416 |
| YOR359W | VTS1    | 2 | msa        | na     | 107 |
| YOR360C | PDE2    | 1 | unassigned | na     | 133 |
| YOR360C | PDE2    | 2 | psiblast   | 1oymA_ | 237 |
| YOR360C | PDE2    | 3 | psiblast   | 1oymA_ | 156 |
| YOR362C | PRE10   | 1 | psiblast   | 1fntG_ | 288 |
| YOR363C | PIP2    | 1 | psiblast   | 1hwtD_ | 111 |
| YOR363C | PIP2    | 2 | unassigned | na     | 139 |
| YOR363C | PIP2    | 3 | msa        | na     | 325 |
| YOR363C | PIP2    | 4 | unassigned | na     | 421 |
| YOR364W | YOR364W | 1 | unassigned | na     | 122 |
| YOR365C | YOR365C | 1 | msa        | na     | 182 |
| YOR365C | YOR365C | 2 | unassigned | na     | 147 |
| YOR365C | YOR365C | 3 | msa        | na     | 311 |
| YOR365C | YOR365C | 4 | unassigned | na     | 63  |
| YOR366W | YOR366W | 1 | unassigned | na     | 117 |
| YOR367W | SCP1    | 1 | psiblast   | 1h67A_ | 200 |
| YOR368W | RAD17   | 1 | psiblast   | 1ge8A_ | 148 |
| YOR368W | RAD17   | 2 | psiblast   | 1ge8A_ | 186 |
| YOR368W | RAD17   | 3 | unassigned | na     | 67  |
| YOR369C | RPS12   | 1 | psiblast   | 1e7kA_ | 143 |
| YOR370C | MRS6    | 1 | psiblast   | 1gnd__ | 494 |
| YOR370C | MRS6    | 2 | unassigned | na     | 109 |
| YOR371C | GPB1    | 1 | unassigned | na     | 645 |
| YOR371C | GPB1    | 2 | msa        | na     | 149 |
| YOR371C | GPB1    | 3 | unassigned | na     | 103 |
| YOR372C | NDD1    | 1 | unassigned | na     | 554 |
| YOR373W | NUD1    | 1 | unassigned | na     | 90  |
| YOR373W | NUD1    | 2 | psiblast   | 1ds9A_ | 58  |
| YOR373W | NUD1    | 3 | psiblast   | 1m9sA_ | 252 |
| YOR373W | NUD1    | 4 | unassigned | na     | 64  |
| YOR373W | NUD1    | 5 | psiblast   | 1o6sA_ | 387 |
| YOR374W | ALD4    | 1 | psiblast   | 1cw3A_ | 330 |
| YOR374W | ALD4    | 2 | psiblast   | 1cw3A_ | 189 |
| YOR375C | GDH1    | 1 | psiblast   | 1bgvA_ | 223 |
| YOR375C | GDH1    | 2 | psiblast   | 1bgvA_ | 231 |
| YOR376W | YOR376W | 1 | unassigned | na     | 122 |
| YOR377W | ATF1    | 1 | unassigned | na     | 195 |
| YOR377W | ATF1    | 2 | msa        | na     | 330 |
| YOR378W | YOR378W | 1 | msa        | na     | 268 |
| YOR378W | YOR378W | 2 | msa        | na     | 247 |
| YOR379C | YOR379C | 1 | unassigned | na     | 112 |
| YOR380W | RDR1    | 1 | psiblast   | 1zmeC_ | 99  |
| YOR380W | RDR1    | 2 | msa        | na     | 447 |
| YOR381W | FRE3    | 1 | psiblast   | 1g8iA_ | 188 |

|         |         |   |            |         |     |
|---------|---------|---|------------|---------|-----|
| YOR381W | FRE3    | 2 | msa        | na      | 168 |
| YOR381W | FRE3    | 3 | psiblast   | 1ndh__  | 173 |
| YOR381W | FRE3    | 4 | psiblast   | 1ndh__  | 182 |
| YOR382W | FIT2    | 1 | unassigned | na      | 153 |
| YOR383C | FIT3    | 1 | msa        | na      | 204 |
| YOR384W | FRE5    | 1 | psiblast   | 5tnc__  | 185 |
| YOR384W | FRE5    | 2 | msa        | na      | 160 |
| YOR384W | FRE5    | 3 | psiblast   | 1cqxA_  | 179 |
| YOR384W | FRE5    | 4 | psiblast   | 1cqxA_  | 170 |
| YOR385W | YOR385W | 1 | unassigned | na      | 290 |
| YOR386W | PHR1    | 1 | unassigned | na      | 71  |
| YOR386W | PHR1    | 2 | psiblast   | 1dnpA_  | 178 |
| YOR386W | PHR1    | 3 | psiblast   | 1dnpA_  | 151 |
| YOR386W | PHR1    | 4 | psiblast   | 1dnpA_  | 165 |
| YOR387C | YOR387C | 1 | unassigned | na      | 206 |
| YOR388C | FDH1    | 1 | psiblast   | 2nacA_  | 173 |
| YOR388C | FDH1    | 2 | psiblast   | 2nacA_  | 203 |
| YOR389W | YOR389W | 1 | msa        | na      | 489 |
| YOR389W | YOR389W | 2 | msa        | na      | 135 |
| YOR390W | YOR390W | 1 | unassigned | na      | 171 |
| YOR390W | YOR390W | 2 | pfam       | PF02537 | 204 |
| YOR391C | HSP33   | 1 | psiblast   | 1n57A_  | 237 |
| YOR392W | YOR392W | 1 | unassigned | na      | 147 |
| YOR393W | ERR1    | 1 | psiblast   | 1els__  | 127 |
| YOR393W | ERR1    | 2 | psiblast   | 1els__  | 310 |
| YOR394W | YOR394W | 1 | pfam       | PF00660 | 164 |
| YPL001W | HAT1    | 1 | psiblast   | 1bob__  | 112 |
| YPL001W | HAT1    | 2 | psiblast   | 1bob__  | 156 |
| YPL001W | HAT1    | 3 | psiblast   | 1bob__  | 106 |
| YPL002C | SNF8    | 1 | msa        | na      | 233 |
| YPL004C | LSP1    | 1 | msa        | na      | 282 |
| YPL004C | LSP1    | 2 | unassigned | na      | 59  |
| YPL005W | AEP3    | 1 | msa        | na      | 138 |
| YPL005W | AEP3    | 2 | msa        | na      | 207 |
| YPL005W | AEP3    | 3 | psiblast   | 1na0A_  | 118 |
| YPL005W | AEP3    | 4 | msa        | na      | 143 |
| YPL006W | NCR1    | 1 | msa        | na      | 284 |
| YPL006W | NCR1    | 2 | psiblast   | 1oy6A_  | 274 |
| YPL006W | NCR1    | 3 | psiblast   | 1oy6A_  | 328 |
| YPL006W | NCR1    | 4 | unassigned | na      | 91  |
| YPL006W | NCR1    | 5 | msa        | na      | 193 |
| YPL007C | TFC8    | 1 | unassigned | na      | 588 |
| YPL008W | CHL1    | 1 | msa        | na      | 75  |
| YPL008W | CHL1    | 2 | unassigned | na      | 73  |
| YPL008W | CHL1    | 3 | psiblast   | 1hv8A_  | 115 |
| YPL008W | CHL1    | 4 | unassigned | na      | 147 |
| YPL008W | CHL1    | 5 | msa        | na      | 451 |
| YPL009C | YPL009C | 1 | psiblast   | 1i84S_  | 254 |



|         |         |   |            |         |     |
|---------|---------|---|------------|---------|-----|
| YPL009C | YPL009C | 2 | psiblast   | 1i84S_  | 315 |
| YPL009C | YPL009C | 3 | msa        | na      | 131 |
| YPL009C | YPL009C | 4 | msa        | na      | 228 |
| YPL009C | YPL009C | 5 | unassigned | na      | 110 |
| YPL010W | RET3    | 1 | psiblast   | 1gw5M_  | 189 |
| YPL011C | TAF3    | 1 | msa        | na      | 152 |
| YPL011C | TAF3    | 2 | unassigned | na      | 201 |
| YPL013C | MRPS16  | 1 | psiblast   | 1emwA_  | 121 |
| YPL014W | YPL014W | 1 | unassigned | na      | 381 |
| YPL015C | HST2    | 1 | psiblast   | 1j8fA_  | 262 |
| YPL015C | HST2    | 2 | psiblast   | 1j8fA_  | 95  |
| YPL016W | SWI1    | 1 | psiblast   | 1epwA_  | 405 |
| YPL016W | SWI1    | 2 | psiblast   | 1kkxA_  | 143 |
| YPL016W | SWI1    | 3 | unassigned | na      | 360 |
| YPL016W | SWI1    | 4 | msa        | na      | 158 |
| YPL016W | SWI1    | 5 | unassigned | na      | 248 |
| YPL017C | YPL017C | 1 | psiblast   | 1jehA_  | 188 |
| YPL017C | YPL017C | 2 | psiblast   | 1jehA_  | 183 |
| YPL017C | YPL017C | 3 | psiblast   | 1jehA_  | 128 |
| YPL018W | CTF19   | 1 | unassigned | na      | 369 |
| YPL019C | VTC3    | 1 | pfam       | PF03105 | 179 |
| YPL019C | VTC3    | 2 | unassigned | na      | 75  |
| YPL019C | VTC3    | 3 | msa        | na      | 298 |
| YPL019C | VTC3    | 4 | unassigned | na      | 107 |
| YPL019C | VTC3    | 5 | msa        | na      | 176 |
| YPL020C | ULP1    | 1 | unassigned | na      | 153 |
| YPL020C | ULP1    | 2 | msa        | na      | 110 |
| YPL020C | ULP1    | 3 | unassigned | na      | 128 |
| YPL020C | ULP1    | 4 | psiblast   | 1euvA_  | 230 |
| YPL021W | ECM23   | 1 | unassigned | na      | 116 |
| YPL021W | ECM23   | 2 | psiblast   | 4gatA_  | 71  |
| YPL022W | RAD1    | 1 | psiblast   | 1qdeA_  | 299 |
| YPL022W | RAD1    | 2 | psiblast   | 1gm5A_  | 286 |
| YPL022W | RAD1    | 3 | psiblast   | 1gm5A_  | 157 |
| YPL022W | RAD1    | 4 | psiblast   | 1d9xA_  | 77  |
| YPL022W | RAD1    | 5 | psiblast   | 1j22A_  | 170 |
| YPL022W | RAD1    | 6 | msa        | na      | 111 |
| YPL023C | MET12   | 1 | psiblast   | 1b5tA_  | 324 |
| YPL023C | MET12   | 2 | unassigned | na      | 69  |
| YPL023C | MET12   | 3 | msa        | na      | 264 |
| YPL024W | NCE4    | 1 | unassigned | na      | 241 |
| YPL025C | YPL025C | 1 | unassigned | na      | 185 |
| YPL026C | SKS1    | 1 | psiblast   | 1ql6A_  | 126 |
| YPL026C | SKS1    | 2 | psiblast   | 1ql6A_  | 65  |
| YPL026C | SKS1    | 3 | psiblast   | 1ql6A_  | 165 |
| YPL026C | SKS1    | 4 | psiblast   | 1niwA_  | 146 |
| YPL027W | SMA1    | 1 | unassigned | na      | 245 |
| YPL028W | ERG10   | 1 | psiblast   | 1dluA_  | 221 |

|         |         |   |            |         |     |
|---------|---------|---|------------|---------|-----|
| YPL028W | ERG10   | 2 | psiblast   | 1dluA_  | 177 |
| YPL029W | SUV3    | 1 | unassigned | na      | 135 |
| YPL029W | SUV3    | 2 | psiblast   | 1fuuA_  | 407 |
| YPL029W | SUV3    | 3 | psiblast   | 1d2mA_  | 113 |
| YPL029W | SUV3    | 4 | unassigned | na      | 82  |
| YPL030W | YPL030W | 1 | unassigned | na      | 165 |
| YPL030W | YPL030W | 2 | msa        | na      | 402 |
| YPL031C | PHO85   | 1 | psiblast   | 1aq1__  | 84  |
| YPL031C | PHO85   | 2 | psiblast   | 1aq1__  | 92  |
| YPL031C | PHO85   | 3 | psiblast   | 1aq1__  | 51  |
| YPL031C | PHO85   | 4 | psiblast   | 1aq1__  | 78  |
| YPL032C | SVL3    | 1 | psiblast   | 1ks9A_  | 213 |
| YPL032C | SVL3    | 2 | psiblast   | 1ks9A_  | 132 |
| YPL032C | SVL3    | 3 | psiblast   | 1i84S_  | 205 |
| YPL032C | SVL3    | 4 | msa        | na      | 275 |
| YPL033C | YPL033C | 1 | psiblast   | 1i01A_  | 281 |
| YPL034W | YPL034W | 1 | unassigned | na      | 165 |
| YPL035C | YPL035C | 1 | unassigned | na      | 115 |
| YPL036W | PMA2    | 1 | psiblast   | 1mhsA_  | 183 |
| YPL036W | PMA2    | 2 | psiblast   | 1mhsA_  | 213 |
| YPL036W | PMA2    | 3 | psiblast   | 1mhsA_  | 316 |
| YPL036W | PMA2    | 4 | psiblast   | 1mhsA_  | 235 |
| YPL037C | EGD1    | 1 | pfam       | PF01849 | 157 |
| YPL038W | MET31   | 1 | psiblast   | 1meyG_  | 177 |
| YPL039W | YPL039W | 1 | unassigned | na      | 316 |
| YPL040C | ISM1    | 1 | psiblast   | 1ffya_  | 113 |
| YPL040C | ISM1    | 2 | psiblast   | 1ffya_  | 362 |
| YPL040C | ISM1    | 3 | psiblast   | 1ffya_  | 274 |
| YPL040C | ISM1    | 4 | psiblast   | 1ffya_  | 253 |
| YPL041C | YPL041C | 1 | unassigned | na      | 207 |
| YPL042C | SSN3    | 1 | psiblast   | 1opkA_  | 416 |
| YPL042C | SSN3    | 2 | psiblast   | 1b38A_  | 56  |
| YPL042C | SSN3    | 3 | unassigned | na      | 83  |
| YPL043W | NOP4    | 1 | psiblast   | 1i3kA_  | 123 |
| YPL043W | NOP4    | 2 | psiblast   | 1i3kA_  | 132 |
| YPL043W | NOP4    | 3 | psiblast   | 1cvjA_  | 128 |
| YPL043W | NOP4    | 4 | psiblast   | 1cvjA_  | 117 |
| YPL043W | NOP4    | 5 | psiblast   | 2up1A_  | 133 |
| YPL043W | NOP4    | 6 | unassigned | na      | 52  |
| YPL044C | YPL044C | 1 | unassigned | na      | 182 |
| YPL045W | VPS16   | 1 | msa        | na      | 432 |
| YPL045W | VPS16   | 2 | unassigned | na      | 187 |
| YPL045W | VPS16   | 3 | msa        | na      | 179 |
| YPL046C | ELC1    | 1 | psiblast   | 1hv2A_  | 47  |
| YPL046C | ELC1    | 2 | psiblast   | 1hv2A_  | 52  |
| YPL047W | SGF11   | 1 | unassigned | na      | 99  |
| YPL049C | DIG1    | 1 | unassigned | na      | 452 |
| YPL050C | MNN9    | 1 | pfam       | PF03452 | 395 |

|         |         |   |            |         |     |
|---------|---------|---|------------|---------|-----|
| YPL051W | ARL3    | 1 | psiblast   | 1ksgA_  | 198 |
| YPL052W | YPL052W | 1 | unassigned | na      | 201 |
| YPL053C | KTR6    | 1 | pfam       | PF01793 | 446 |
| YPL054W | LEE1    | 1 | psiblast   | 1m9oA_  | 118 |
| YPL054W | LEE1    | 2 | msa        | na      | 183 |
| YPL055C | LGE1    | 1 | unassigned | na      | 332 |
| YPL056C | YPL056C | 1 | unassigned | na      | 101 |
| YPL058C | PDR12   | 1 | unassigned | na      | 85  |
| YPL058C | PDR12   | 2 | psiblast   | 1jj7A_  | 336 |
| YPL058C | PDR12   | 3 | unassigned | na      | 417 |
| YPL058C | PDR12   | 4 | psiblast   | 1mt0A_  | 57  |
| YPL058C | PDR12   | 5 | psiblast   | 1mt0A_  | 196 |
| YPL058C | PDR12   | 6 | msa        | na      | 298 |
| YPL058C | PDR12   | 7 | unassigned | na      | 122 |
| YPL059W | GRX5    | 1 | psiblast   | 1kte__  | 150 |
| YPL060W | LPE10   | 1 | msa        | na      | 117 |
| YPL060W | LPE10   | 2 | msa        | na      | 296 |
| YPL061W | ALD6    | 1 | psiblast   | 1nzxA_  | 310 |
| YPL061W | ALD6    | 2 | psiblast   | 1nzxA_  | 190 |
| YPL062W | YPL062W | 1 | unassigned | na      | 134 |
| YPL063W | TIM50   | 1 | msa        | na      | 163 |
| YPL063W | TIM50   | 2 | pfam       | PF03031 | 219 |
| YPL063W | TIM50   | 3 | unassigned | na      | 94  |
| YPL064C | CWC27   | 1 | psiblast   | 1ak4A_  | 197 |
| YPL064C | CWC27   | 2 | unassigned | na      | 104 |
| YPL065W | VPS28   | 1 | msa        | na      | 242 |
| YPL066W | YPL066W | 1 | unassigned | na      | 479 |
| YPL067C | YPL067C | 1 | unassigned | na      | 198 |
| YPL068C | YPL068C | 1 | unassigned | na      | 293 |
| YPL069C | BTS1    | 1 | psiblast   | 1ubx__  | 168 |
| YPL069C | BTS1    | 2 | psiblast   | 1ubx__  | 167 |
| YPL070W | MUK1    | 1 | msa        | na      | 159 |
| YPL070W | MUK1    | 2 | unassigned | na      | 109 |
| YPL070W | MUK1    | 3 | pfam       | PF02204 | 193 |
| YPL070W | MUK1    | 4 | unassigned | na      | 151 |
| YPL071C | YPL071C | 1 | unassigned | na      | 156 |
| YPL072W | UBP16   | 1 | psiblast   | 1nbfA_  | 447 |
| YPL072W | UBP16   | 2 | unassigned | na      | 52  |
| YPL073C | YPL073C | 1 | unassigned | na      | 161 |
| YPL074W | YTA6    | 1 | msa        | na      | 215 |
| YPL074W | YTA6    | 2 | psiblast   | 1ksfX_  | 159 |
| YPL074W | YTA6    | 3 | psiblast   | 1ksfX_  | 144 |
| YPL074W | YTA6    | 4 | psiblast   | 1e32A_  | 129 |
| YPL074W | YTA6    | 5 | psiblast   | 1e32A_  | 107 |
| YPL076W | GPI2    | 1 | msa        | na      | 184 |
| YPL076W | GPI2    | 2 | unassigned | na      | 96  |
| YPL077C | YPL077C | 1 | unassigned | na      | 100 |
| YPL077C | YPL077C | 2 | msa        | na      | 140 |

|         |         |    |            |         |     |
|---------|---------|----|------------|---------|-----|
| YPL078C | ATP4    | 1  | msa        | na      | 89  |
| YPL078C | ATP4    | 2  | msa        | na      | 155 |
| YPL079W | RPL21B  | 1  | psiblast   | 1ffkN_  | 160 |
| YPL080C | YPL080C | 1  | unassigned | na      | 108 |
| YPL081W | RPS9A   | 1  | psiblast   | 1c05A_  | 105 |
| YPL081W | RPS9A   | 2  | psiblast   | 1c05A_  | 92  |
| YPL082C | MOT1    | 1  | msa        | na      | 266 |
| YPL082C | MOT1    | 2  | unassigned | na      | 194 |
| YPL082C | MOT1    | 3  | msa        | na      | 229 |
| YPL082C | MOT1    | 4  | unassigned | na      | 329 |
| YPL082C | MOT1    | 5  | msa        | na      | 180 |
| YPL082C | MOT1    | 6  | unassigned | na      | 71  |
| YPL082C | MOT1    | 7  | pfam       | PF00176 | 314 |
| YPL082C | MOT1    | 8  | unassigned | na      | 89  |
| YPL082C | MOT1    | 9  | pfam       | PF00271 | 74  |
| YPL082C | MOT1    | 10 | msa        | na      | 121 |
| YPL083C | SEN54   | 1  | msa        | na      | 381 |
| YPL083C | SEN54   | 2  | unassigned | na      | 86  |
| YPL084W | BRO1    | 1  | pfam       | PF03097 | 163 |
| YPL084W | BRO1    | 2  | unassigned | na      | 128 |
| YPL084W | BRO1    | 3  | psiblast   | 1c1gA_  | 93  |
| YPL084W | BRO1    | 4  | psiblast   | 1i84S_  | 368 |
| YPL084W | BRO1    | 5  | unassigned | na      | 92  |
| YPL086C | ELP3    | 1  | msa        | na      | 423 |
| YPL086C | ELP3    | 2  | pfam       | PF00583 | 134 |
| YPL087W | YDC1    | 1  | msa        | na      | 317 |
| YPL088W | YPL088W | 1  | psiblast   | 1exbA_  | 279 |
| YPL088W | YPL088W | 2  | psiblast   | 1exbA_  | 63  |
| YPL089C | RLM1    | 1  | psiblast   | 1egwA_  | 80  |
| YPL089C | RLM1    | 2  | msa        | na      | 180 |
| YPL089C | RLM1    | 3  | msa        | na      | 189 |
| YPL089C | RLM1    | 4  | unassigned | na      | 82  |
| YPL089C | RLM1    | 5  | msa        | na      | 145 |
| YPL091W | GLR1    | 1  | psiblast   | 1grt__  | 192 |
| YPL091W | GLR1    | 2  | psiblast   | 1grt__  | 164 |
| YPL091W | GLR1    | 3  | psiblast   | 1grt__  | 127 |
| YPL092W | SSU1    | 1  | msa        | na      | 339 |
| YPL092W | SSU1    | 2  | unassigned | na      | 119 |
| YPL093W | NOG1    | 1  | psiblast   | 1mkyA_  | 161 |
| YPL093W | NOG1    | 2  | psiblast   | 1mkyA_  | 183 |
| YPL093W | NOG1    | 3  | psiblast   | 1mkyA_  | 96  |
| YPL093W | NOG1    | 4  | msa        | na      | 207 |
| YPL094C | SEC62   | 1  | pfam       | PF03839 | 283 |
| YPL095C | YPL095C | 1  | msa        | na      | 130 |
| YPL095C | YPL095C | 2  | psiblast   | 1a8s__  | 326 |
| YPL096W | PNG1    | 1  | msa        | na      | 133 |
| YPL096W | PNG1    | 2  | pfam       | PF01841 | 144 |
| YPL096W | PNG1    | 3  | msa        | na      | 86  |

|         |         |   |            |         |     |
|---------|---------|---|------------|---------|-----|
| YPL097W | MSY1    | 1 | psiblast   | 1jiiA_  | 297 |
| YPL097W | MSY1    | 2 | psiblast   | 1jiiA_  | 195 |
| YPL098C | YPL098C | 1 | unassigned | na      | 113 |
| YPL099C | FMP14   | 1 | unassigned | na      | 182 |
| YPL100W | ATG21   | 1 | psiblast   | 1nexB_  | 366 |
| YPL100W | ATG21   | 2 | psiblast   | 1k8kC_  | 57  |
| YPL100W | ATG21   | 3 | psiblast   | 1erjA_  | 73  |
| YPL101W | ELP4    | 1 | msa        | na      | 302 |
| YPL101W | ELP4    | 2 | msa        | na      | 154 |
| YPL102C | YPL102C | 1 | unassigned | na      | 100 |
| YPL103C | FMP30   | 1 | unassigned | na      | 174 |
| YPL103C | FMP30   | 2 | psiblast   | 1smlA_  | 164 |
| YPL103C | FMP30   | 3 | psiblast   | 1smlA_  | 130 |
| YPL104W | MSD1    | 1 | psiblast   | 1eqrA_  | 139 |
| YPL104W | MSD1    | 2 | psiblast   | 1eqrA_  | 519 |
| YPL105C | YPL105C | 1 | unassigned | na      | 143 |
| YPL105C | YPL105C | 2 | pfam       | PF02213 | 87  |
| YPL105C | YPL105C | 3 | psiblast   | 1i84S_  | 360 |
| YPL105C | YPL105C | 4 | unassigned | na      | 259 |
| YPL106C | SSE1    | 1 | psiblast   | 1hjoA_  | 192 |
| YPL106C | SSE1    | 2 | psiblast   | 1hjoA_  | 119 |
| YPL106C | SSE1    | 3 | psiblast   | 1hjoA_  | 75  |
| YPL106C | SSE1    | 4 | psiblast   | 1dkyA_  | 180 |
| YPL106C | SSE1    | 5 | psiblast   | 1dkyA_  | 127 |
| YPL107W | YPL107W | 1 | msa        | na      | 192 |
| YPL107W | YPL107W | 2 | unassigned | na      | 56  |
| YPL108W | YPL108W | 1 | unassigned | na      | 168 |
| YPL109C | YPL109C | 1 | msa        | na      | 155 |
| YPL109C | YPL109C | 2 | psiblast   | 1mruA_  | 126 |
| YPL109C | YPL109C | 3 | psiblast   | 1mruA_  | 97  |
| YPL109C | YPL109C | 4 | psiblast   | 1mruA_  | 165 |
| YPL110C | YPL110C | 1 | pfam       | PF03105 | 202 |
| YPL110C | YPL110C | 2 | unassigned | na      | 60  |
| YPL110C | YPL110C | 3 | psiblast   | 1n11A_  | 104 |
| YPL110C | YPL110C | 4 | psiblast   | 1n11A_  | 145 |
| YPL110C | YPL110C | 5 | psiblast   | 1n11A_  | 169 |
| YPL110C | YPL110C | 6 | psiblast   | 1sw6A_  | 68  |
| YPL110C | YPL110C | 7 | unassigned | na      | 109 |
| YPL110C | YPL110C | 8 | psiblast   | 1o1zA_  | 182 |
| YPL110C | YPL110C | 9 | pfam       | PF03009 | 184 |
| YPL111W | CAR1    | 1 | psiblast   | 1hqxA_  | 333 |
| YPL112C | PEX25   | 1 | unassigned | na      | 84  |
| YPL112C | PEX25   | 2 | msa        | na      | 310 |
| YPL113C | YPL113C | 1 | psiblast   | 1gdhA_  | 153 |
| YPL113C | YPL113C | 2 | psiblast   | 1gdhA_  | 243 |
| YPL114W | YPL114W | 1 | unassigned | na      | 139 |
| YPL115C | BEM3    | 1 | unassigned | na      | 155 |
| YPL115C | BEM3    | 2 | msa        | na      | 356 |

|         |        |   |            |         |     |
|---------|--------|---|------------|---------|-----|
| YPL115C | BEM3   | 3 | pfam       | PF00787 | 118 |
| YPL115C | BEM3   | 4 | pfam       | PF00169 | 119 |
| YPL115C | BEM3   | 5 | unassigned | na      | 124 |
| YPL115C | BEM3   | 6 | psiblast   | 1am4A_  | 137 |
| YPL115C | BEM3   | 7 | psiblast   | 1am4A_  | 119 |
| YPL116W | HOS3   | 1 | psiblast   | 1c3pA_  | 224 |
| YPL116W | HOS3   | 2 | psiblast   | 1c3pA_  | 241 |
| YPL116W | HOS3   | 3 | msa        | na      | 232 |
| YPL117C | IDI1   | 1 | psiblast   | 1nfsA_  | 288 |
| YPL118W | MRP51  | 1 | msa        | na      | 101 |
| YPL118W | MRP51  | 2 | unassigned | na      | 243 |
| YPL119C | DBP1   | 1 | msa        | na      | 146 |
| YPL119C | DBP1   | 2 | psiblast   | 1hv8A_  | 235 |
| YPL119C | DBP1   | 3 | psiblast   | 1hv8A_  | 176 |
| YPL119C | DBP1   | 4 | unassigned | na      | 60  |
| YPL120W | VPS30  | 1 | psiblast   | 1i84S_  | 339 |
| YPL120W | VPS30  | 2 | msa        | na      | 125 |
| YPL120W | VPS30  | 3 | unassigned | na      | 93  |
| YPL121C | MEI5   | 1 | unassigned | na      | 222 |
| YPL122C | TFB2   | 1 | pfam       | PF03849 | 414 |
| YPL122C | TFB2   | 2 | unassigned | na      | 99  |
| YPL123C | RNY1   | 1 | psiblast   | 1bolA_  | 299 |
| YPL123C | RNY1   | 2 | unassigned | na      | 135 |
| YPL124W | SPC29  | 1 | unassigned | na      | 253 |
| YPL125W | KAP120 | 1 | msa        | na      | 702 |
| YPL125W | KAP120 | 2 | msa        | na      | 214 |
| YPL125W | KAP120 | 3 | msa        | na      | 116 |
| YPL126W | NAN1   | 1 | psiblast   | 1nexB_  | 172 |
| YPL126W | NAN1   | 2 | psiblast   | 1erjA_  | 364 |
| YPL126W | NAN1   | 3 | psiblast   | 1gg2B_  | 96  |
| YPL126W | NAN1   | 4 | psiblast   | 1l0qA_  | 264 |
| YPL127C | HHO1   | 1 | psiblast   | 1hstA_  | 142 |
| YPL127C | HHO1   | 2 | msa        | na      | 116 |
| YPL128C | TBF1   | 1 | unassigned | na      | 112 |
| YPL128C | TBF1   | 2 | msa        | na      | 272 |
| YPL128C | TBF1   | 3 | pfam       | PF00249 | 113 |
| YPL128C | TBF1   | 4 | unassigned | na      | 65  |
| YPL129W | TAF14  | 1 | pfam       | PF03366 | 154 |
| YPL129W | TAF14  | 2 | unassigned | na      | 90  |
| YPL130W | SPO19  | 1 | unassigned | na      | 223 |
| YPL131W | RPL5   | 1 | psiblast   | 1ffkK_  | 297 |
| YPL132W | COX11  | 1 | msa        | na      | 300 |
| YPL133C | RDS2   | 1 | psiblast   | 1pyc__  | 55  |
| YPL133C | RDS2   | 2 | msa        | na      | 142 |
| YPL133C | RDS2   | 3 | unassigned | na      | 249 |
| YPL134C | ODC1   | 1 | pfam       | PF00153 | 117 |
| YPL134C | ODC1   | 2 | pfam       | PF00153 | 95  |
| YPL134C | ODC1   | 3 | pfam       | PF00153 | 98  |

|         |         |   |            |         |     |
|---------|---------|---|------------|---------|-----|
| YPL135W | ISU1    | 1 | pfam       | PF01592 | 165 |
| YPL136W | YPL136W | 1 | unassigned | na      | 122 |
| YPL137C | YPL137C | 1 | msa        | na      | 498 |
| YPL137C | YPL137C | 2 | psiblast   | 2bnh__  | 94  |
| YPL137C | YPL137C | 3 | psiblast   | 2bnh__  | 52  |
| YPL137C | YPL137C | 4 | psiblast   | 2bnh__  | 57  |
| YPL137C | YPL137C | 5 | psiblast   | 2bnh__  | 216 |
| YPL137C | YPL137C | 6 | msa        | na      | 202 |
| YPL137C | YPL137C | 7 | unassigned | na      | 157 |
| YPL138C | SPP1    | 1 | psiblast   | 1fp0A_  | 109 |
| YPL138C | SPP1    | 2 | psiblast   | 1e6iA_  | 192 |
| YPL138C | SPP1    | 3 | unassigned | na      | 52  |
| YPL139C | UME1    | 1 | unassigned | na      | 64  |
| YPL139C | UME1    | 2 | psiblast   | 1gg2B_  | 396 |
| YPL140C | MKK2    | 1 | psiblast   | 1f3mA_  | 77  |
| YPL140C | MKK2    | 2 | unassigned | na      | 93  |
| YPL140C | MKK2    | 3 | psiblast   | 1f3mC_  | 124 |
| YPL140C | MKK2    | 4 | psiblast   | 1f3mC_  | 212 |
| YPL141C | YPL141C | 1 | psiblast   | 1ia8A_  | 114 |
| YPL141C | YPL141C | 2 | psiblast   | 1ia8A_  | 76  |
| YPL141C | YPL141C | 3 | psiblast   | 1ia8A_  | 180 |
| YPL141C | YPL141C | 4 | unassigned | na      | 495 |
| YPL142C | YPL142C | 1 | unassigned | na      | 105 |
| YPL143W | RPL33A  | 1 | pfam       | PF01247 | 107 |
| YPL144W | YPL144W | 1 | unassigned | na      | 148 |
| YPL145C | KES1    | 1 | pfam       | PF01237 | 434 |
| YPL146C | YPL146C | 1 | psiblast   | 1i84S_  | 385 |
| YPL146C | YPL146C | 2 | unassigned | na      | 70  |
| YPL147W | PXA1    | 1 | unassigned | na      | 302 |
| YPL147W | PXA1    | 2 | psiblast   | 1jsqA_  | 268 |
| YPL147W | PXA1    | 3 | psiblast   | 1jsqA_  | 300 |
| YPL148C | PPT2    | 1 | pfam       | PF01648 | 177 |
| YPL149W | ATG5    | 1 | msa        | na      | 196 |
| YPL149W | ATG5    | 2 | msa        | na      | 98  |
| YPL150W | YPL150W | 1 | psiblast   | 1gznA_  | 94  |
| YPL150W | YPL150W | 2 | psiblast   | 1gznA_  | 328 |
| YPL150W | YPL150W | 3 | unassigned | na      | 479 |
| YPL151C | PRP46   | 1 | psiblast   | 1nexB_  | 367 |
| YPL151C | PRP46   | 2 | psiblast   | 1erjA_  | 84  |
| YPL152W | RRD2    | 1 | pfam       | PF03095 | 358 |
| YPL153C | RAD53   | 1 | psiblast   | 1g3gA_  | 165 |
| YPL153C | RAD53   | 2 | psiblast   | 1a06__  | 157 |
| YPL153C | RAD53   | 3 | psiblast   | 1a06__  | 212 |
| YPL153C | RAD53   | 4 | psiblast   | 1qu5A_  | 219 |
| YPL153C | RAD53   | 5 | unassigned | na      | 68  |
| YPL154C | PEP4    | 1 | unassigned | na      | 74  |
| YPL154C | PEP4    | 2 | psiblast   | 1dp5A_  | 198 |
| YPL154C | PEP4    | 3 | psiblast   | 1dp5A_  | 133 |

|         |         |              |         |     |
|---------|---------|--------------|---------|-----|
| YPL155C | KIP2    | 1 unassigned | na      | 71  |
| YPL155C | KIP2    | 2 psiblast   | 1gojA_  | 436 |
| YPL155C | KIP2    | 3 psiblast   | 1i84S_  | 199 |
| YPL156C | PRM4    | 1 unassigned | na      | 118 |
| YPL156C | PRM4    | 2 psiblast   | 1jhb__  | 166 |
| YPL157W | TGS1    | 1 unassigned | na      | 96  |
| YPL157W | TGS1    | 2 psiblast   | 1f38A_  | 167 |
| YPL157W | TGS1    | 3 unassigned | na      | 52  |
| YPL158C | YPL158C | 1 unassigned | na      | 129 |
| YPL158C | YPL158C | 2 psiblast   | 1epwA_  | 629 |
| YPL159C | PET20   | 1 msa        | na      | 253 |
| YPL160W | CDC60   | 1 psiblast   | 1ffyA_  | 71  |
| YPL160W | CDC60   | 2 psiblast   | 1ffyA_  | 311 |
| YPL160W | CDC60   | 3 psiblast   | 1ffyA_  | 279 |
| YPL160W | CDC60   | 4 psiblast   | 1ffyA_  | 338 |
| YPL160W | CDC60   | 5 msa        | na      | 91  |
| YPL161C | BEM4    | 1 unassigned | na      | 633 |
| YPL162C | YPL162C | 1 unassigned | na      | 88  |
| YPL162C | YPL162C | 2 msa        | na      | 185 |
| YPL163C | SVS1    | 1 unassigned | na      | 260 |
| YPL165C | SET6    | 1 msa        | na      | 84  |
| YPL165C | SET6    | 2 psiblast   | 1ml9A_  | 201 |
| YPL165C | SET6    | 3 psiblast   | 1ml9A_  | 88  |
| YPL166W | YPL166W | 1 unassigned | na      | 213 |
| YPL167C | REV3    | 1 msa        | na      | 496 |
| YPL167C | REV3    | 2 psiblast   | 1tgoA_  | 358 |
| YPL167C | REV3    | 3 psiblast   | 1tgoA_  | 242 |
| YPL167C | REV3    | 4 psiblast   | 1tgoA_  | 118 |
| YPL167C | REV3    | 5 psiblast   | 1tgoA_  | 180 |
| YPL167C | REV3    | 6 msa        | na      | 110 |
| YPL168W | YPL168W | 1 unassigned | na      | 430 |
| YPL169C | MEX67   | 1 psiblast   | 1ft8A_  | 98  |
| YPL169C | MEX67   | 2 psiblast   | 1ft8A_  | 162 |
| YPL169C | MEX67   | 3 psiblast   | 1p8tA_  | 115 |
| YPL169C | MEX67   | 4 unassigned | na      | 70  |
| YPL169C | MEX67   | 5 psiblast   | 1jkgB_  | 154 |
| YPL170W | DAP1    | 1 psiblast   | 1eueA_  | 152 |
| YPL171C | OYE3    | 1 psiblast   | 1oya__  | 400 |
| YPL172C | COX10   | 1 msa        | na      | 83  |
| YPL172C | COX10   | 2 unassigned | na      | 71  |
| YPL172C | COX10   | 3 pfam       | PF01040 | 308 |
| YPL173W | MRPL40  | 1 pfam       | PF00467 | 142 |
| YPL173W | MRPL40  | 2 unassigned | na      | 155 |
| YPL174C | NIP100  | 1 psiblast   | 1i84S_  | 342 |
| YPL174C | NIP100  | 2 unassigned | na      | 103 |
| YPL174C | NIP100  | 3 psiblast   | 1c1gA_  | 117 |
| YPL174C | NIP100  | 4 psiblast   | 1c1gA_  | 228 |
| YPL174C | NIP100  | 5 unassigned | na      | 78  |



|           |            |   |            |         |     |
|-----------|------------|---|------------|---------|-----|
| YPL175W   | SPT14      | 1 | psiblast   | 1f0kA_  | 185 |
| YPL175W   | SPT14      | 2 | psiblast   | 1f0kA_  | 128 |
| YPL175W   | SPT14      | 3 | msa        | na      | 148 |
| YPL176C   | YPL176C    | 1 | unassigned | na      | 136 |
| YPL176C   | YPL176C    | 2 | psiblast   | 1de4C_  | 322 |
| YPL176C   | YPL176C    | 3 | psiblast   | 1de4C_  | 325 |
| YPL177C   | CUP9       | 1 | msa        | na      | 127 |
| YPL177C   | CUP9       | 2 | psiblast   | 1b72B_  | 179 |
| YPL178W   | CBC2       | 1 | psiblast   | 1h2tZ_  | 208 |
| YPL179W   | PPQ1       | 1 | unassigned | na      | 72  |
| YPL179W   | PPQ1       | 2 | psiblast   | 1a17__  | 159 |
| YPL179W   | PPQ1       | 3 | psiblast   | 1fjmA_  | 318 |
| YPL180W   | TCO89      | 1 | msa        | na      | 568 |
| YPL180W   | TCO89      | 2 | unassigned | na      | 231 |
| YPL181W   | CTI6       | 1 | unassigned | na      | 68  |
| YPL181W   | CTI6       | 2 | pfam       | PF00628 | 59  |
| YPL181W   | CTI6       | 3 | msa        | na      | 379 |
| YPL182C   | YPL182C    | 1 | unassigned | na      | 127 |
| YPL183C   | YPL183C    | 1 | psiblast   | 1gg2B_  | 116 |
| YPL183C   | YPL183C    | 2 | psiblast   | 1erjA_  | 303 |
| YPL183C   | YPL183C    | 3 | psiblast   | 1l0qA_  | 79  |
| YPL183C   | YPL183C    | 4 | msa        | na      | 313 |
| YPL183C   | YPL183C    | 5 | msa        | na      | 202 |
| YPL183W-A | GON5       | 1 | psiblast   | 1dfeA_  | 93  |
| YPL184C   | YPL184C    | 1 | msa        | na      | 167 |
| YPL184C   | YPL184C    | 2 | psiblast   | 1cvjA_  | 126 |
| YPL184C   | YPL184C    | 3 | psiblast   | 1qm9A_  | 109 |
| YPL184C   | YPL184C    | 4 | psiblast   | 1qm9A_  | 128 |
| YPL184C   | YPL184C    | 5 | psiblast   | 1o0pA_  | 82  |
| YPL185W   | YPL185W    | 1 | unassigned | na      | 131 |
| YPL186C   | UIP4       | 1 | msa        | na      | 208 |
| YPL186C   | UIP4       | 2 | unassigned | na      | 96  |
| YPL187W   | MF(ALPHA)1 | 1 | unassigned | na      | 165 |
| YPL188W   | POS5       | 1 | unassigned | na      | 97  |
| YPL188W   | POS5       | 2 | pfam       | PF01513 | 317 |
| YPL189W   | GUP2       | 1 | msa        | na      | 156 |
| YPL189W   | GUP2       | 2 | msa        | na      | 453 |
| YPL190C   | NAB3       | 1 | unassigned | na      | 116 |
| YPL190C   | NAB3       | 2 | psiblast   | 1epwA_  | 284 |
| YPL190C   | NAB3       | 3 | unassigned | na      | 158 |
| YPL190C   | NAB3       | 4 | msa        | na      | 244 |
| YPL191C   | YPL191C    | 1 | msa        | na      | 204 |
| YPL191C   | YPL191C    | 2 | unassigned | na      | 156 |
| YPL192C   | PRM3       | 1 | unassigned | na      | 133 |
| YPL193W   | RSA1       | 1 | unassigned | na      | 381 |
| YPL194W   | DDC1       | 1 | unassigned | na      | 612 |
| YPL195W   | APL5       | 1 | psiblast   | 1gw5A_  | 94  |
| YPL195W   | APL5       | 2 | psiblast   | 1b3uA_  | 172 |

|         |         |   |            |         |     |
|---------|---------|---|------------|---------|-----|
| YPL195W | APL5    | 3 | psiblast   | 1b3uA_  | 64  |
| YPL195W | APL5    | 4 | psiblast   | 1b3uA_  | 172 |
| YPL195W | APL5    | 5 | psiblast   | 1b3uA_  | 151 |
| YPL195W | APL5    | 6 | unassigned | na      | 59  |
| YPL195W | APL5    | 7 | msa        | na      | 220 |
| YPL196W | OXR1    | 1 | msa        | na      | 95  |
| YPL196W | OXR1    | 2 | msa        | na      | 178 |
| YPL197C | YPL197C | 1 | unassigned | na      | 137 |
| YPL198W | RPL7B   | 1 | unassigned | na      | 78  |
| YPL198W | RPL7B   | 2 | psiblast   | 1ffkT_  | 166 |
| YPL199C | YPL199C | 1 | unassigned | na      | 92  |
| YPL199C | YPL199C | 2 | pfam       | PF01713 | 148 |
| YPL200W | CSM4    | 1 | unassigned | na      | 156 |
| YPL201C | YPL201C | 1 | unassigned | na      | 461 |
| YPL202C | AFT2    | 1 | unassigned | na      | 227 |
| YPL202C | AFT2    | 2 | msa        | na      | 76  |
| YPL202C | AFT2    | 3 | unassigned | na      | 113 |
| YPL203W | TPK2    | 1 | psiblast   | 1fotA_  | 172 |
| YPL203W | TPK2    | 2 | psiblast   | 1fotA_  | 208 |
| YPL204W | HRR25   | 1 | psiblast   | 1ckiA_  | 69  |
| YPL204W | HRR25   | 2 | psiblast   | 1ckiA_  | 278 |
| YPL204W | HRR25   | 3 | unassigned | na      | 147 |
| YPL205C | YPL205C | 1 | unassigned | na      | 114 |
| YPL206C | YPL206C | 1 | psiblast   | 1o1zA_  | 321 |
| YPL207W | YPL207W | 1 | unassigned | na      | 123 |
| YPL207W | YPL207W | 2 | psiblast   | 4nosA_  | 50  |
| YPL207W | YPL207W | 3 | psiblast   | 1j9zA_  | 215 |
| YPL207W | YPL207W | 4 | psiblast   | 1j9zA_  | 57  |
| YPL207W | YPL207W | 5 | msa        | na      | 283 |
| YPL207W | YPL207W | 6 | msa        | na      | 82  |
| YPL208W | YPL208W | 1 | psiblast   | 1mlvA_  | 246 |
| YPL208W | YPL208W | 2 | psiblast   | 1mlvA_  | 95  |
| YPL208W | YPL208W | 3 | psiblast   | 1mlvA_  | 171 |
| YPL208W | YPL208W | 4 | unassigned | na      | 71  |
| YPL209C | IPL1    | 1 | unassigned | na      | 75  |
| YPL209C | IPL1    | 2 | psiblast   | 1fotA_  | 95  |
| YPL209C | IPL1    | 3 | psiblast   | 1fotA_  | 197 |
| YPL210C | SRP72   | 1 | psiblast   | 1fchA_  | 139 |
| YPL210C | SRP72   | 2 | psiblast   | 1fchA_  | 110 |
| YPL210C | SRP72   | 3 | psiblast   | 1kt1A_  | 129 |
| YPL210C | SRP72   | 4 | msa        | na      | 202 |
| YPL210C | SRP72   | 5 | msa        | na      | 66  |
| YPL211W | NIP7    | 1 | pfam       | PF03657 | 181 |
| YPL212C | PUS1    | 1 | unassigned | na      | 64  |
| YPL212C | PUS1    | 2 | psiblast   | 1dj0A_  | 137 |
| YPL212C | PUS1    | 3 | psiblast   | 1dj0A_  | 105 |
| YPL212C | PUS1    | 4 | msa        | na      | 238 |
| YPL213W | LEA1    | 1 | psiblast   | 1a9nA_  | 238 |

|         |         |   |            |         |     |
|---------|---------|---|------------|---------|-----|
| YPL214C | THI6    | 1 | psiblast   | 1g4tA_  | 233 |
| YPL214C | THI6    | 2 | psiblast   | 1c3qA_  | 307 |
| YPL215W | CBP3    | 1 | unassigned | na      | 65  |
| YPL215W | CBP3    | 2 | msa        | na      | 270 |
| YPL216W | YPL216W | 1 | msa        | na      | 433 |
| YPL216W | YPL216W | 2 | unassigned | na      | 669 |
| YPL217C | BMS1    | 1 | msa        | na      | 174 |
| YPL217C | BMS1    | 2 | unassigned | na      | 155 |
| YPL217C | BMS1    | 3 | psiblast   | 1i84S_  | 364 |
| YPL217C | BMS1    | 4 | msa        | na      | 289 |
| YPL217C | BMS1    | 5 | msa        | na      | 114 |
| YPL217C | BMS1    | 6 | unassigned | na      | 87  |
| YPL218W | SAR1    | 1 | psiblast   | 1m2oB_  | 190 |
| YPL219W | PCL8    | 1 | unassigned | na      | 290 |
| YPL219W | PCL8    | 2 | msa        | na      | 202 |
| YPL221W | BOP1    | 1 | msa        | na      | 216 |
| YPL221W | BOP1    | 2 | unassigned | na      | 78  |
| YPL221W | BOP1    | 3 | msa        | na      | 307 |
| YPL221W | BOP1    | 4 | msa        | na      | 192 |
| YPL222W | FMP40   | 1 | pfam       | PF02696 | 688 |
| YPL223C | GRE1    | 1 | unassigned | na      | 168 |
| YPL224C | MMT2    | 1 | unassigned | na      | 116 |
| YPL224C | MMT2    | 2 | pfam       | PF01545 | 333 |
| YPL225W | YPL225W | 1 | unassigned | na      | 146 |
| YPL226W | NEW1    | 1 | msa        | na      | 172 |
| YPL226W | NEW1    | 2 | unassigned | na      | 108 |
| YPL226W | NEW1    | 3 | psiblast   | 1ii8B_  | 147 |
| YPL226W | NEW1    | 4 | psiblast   | 1ii8B_  | 71  |
| YPL226W | NEW1    | 5 | unassigned | na      | 66  |
| YPL226W | NEW1    | 6 | psiblast   | 1oxsC_  | 203 |
| YPL226W | NEW1    | 7 | psiblast   | 1jsqA_  | 266 |
| YPL226W | NEW1    | 8 | msa        | na      | 163 |
| YPL227C | ALG5    | 1 | unassigned | na      | 67  |
| YPL227C | ALG5    | 2 | psiblast   | 1h7IA_  | 150 |
| YPL227C | ALG5    | 3 | msa        | na      | 117 |
| YPL228W | CET1    | 1 | unassigned | na      | 219 |
| YPL228W | CET1    | 2 | psiblast   | 1d8hA_  | 330 |
| YPL229W | YPL229W | 1 | unassigned | na      | 100 |
| YPL229W | YPL229W | 2 | msa        | na      | 106 |
| YPL230W | YPL230W | 1 | psiblast   | 1a1iA_  | 115 |
| YPL230W | YPL230W | 2 | msa        | na      | 56  |
| YPL230W | YPL230W | 3 | msa        | na      | 76  |
| YPL230W | YPL230W | 4 | msa        | na      | 61  |
| YPL230W | YPL230W | 5 | psiblast   | 2adr__  | 83  |
| YPL231W | FAS2    | 1 | msa        | na      | 217 |
| YPL231W | FAS2    | 2 | unassigned | na      | 417 |
| YPL231W | FAS2    | 3 | psiblast   | 1gz6A_  | 262 |
| YPL231W | FAS2    | 4 | msa        | na      | 230 |

|         |         |   |                |         |     |
|---------|---------|---|----------------|---------|-----|
| YPL231W | FAS2    | 5 | psiblast       | 1e5mA_  | 306 |
| YPL231W | FAS2    | 6 | psiblast       | 1e5mA_  | 151 |
| YPL231W | FAS2    | 7 | msa            | na      | 78  |
| YPL231W | FAS2    | 8 | unassigned     | na      | 90  |
| YPL231W | FAS2    | 9 | psiblast       | 1f80A_  | 136 |
| YPL232W | SSO1    | 1 | psiblast       | 1fioA_  | 235 |
| YPL232W | SSO1    | 2 | psiblast       | 1fioA_  | 55  |
| YPL233W | NSL1    | 1 | fold_recogniti | 1cunA   | 132 |
| YPL233W | NSL1    | 2 | fold_recogniti | 1cunA   | 84  |
| YPL234C | TFP3    | 1 | pfam           | PF00137 | 85  |
| YPL234C | TFP3    | 2 | pfam           | PF00137 | 79  |
| YPL235W | RVB2    | 1 | psiblast       | 1e32A_  | 224 |
| YPL235W | RVB2    | 2 | psiblast       | 1e32A_  | 58  |
| YPL235W | RVB2    | 3 | psiblast       | 1jr3A_  | 189 |
| YPL236C | YPL236C | 1 | psiblast       | 1muoA_  | 121 |
| YPL236C | YPL236C | 2 | psiblast       | 1muoA_  | 243 |
| YPL237W | SUI3    | 1 | msa            | na      | 124 |
| YPL237W | SUI3    | 2 | psiblast       | 1k8bA_  | 93  |
| YPL237W | SUI3    | 3 | psiblast       | 1k81A_  | 68  |
| YPL238C | YPL238C | 1 | unassigned     | na      | 129 |
| YPL239W | YAR1    | 1 | psiblast       | 1n0rA_  | 121 |
| YPL239W | YAR1    | 2 | psiblast       | 1n0rA_  | 79  |
| YPL240C | HSP82   | 1 | psiblast       | 1a4h__  | 219 |
| YPL240C | HSP82   | 2 | pfam           | PF00183 | 490 |
| YPL241C | CIN2    | 1 | unassigned     | na      | 268 |
| YPL242C | IOG1    | 1 | unassigned     | na      | 86  |
| YPL242C | IOG1    | 2 | psiblast       | 1i84S_  | 589 |
| YPL242C | IOG1    | 3 | psiblast       | 1i84S_  | 298 |
| YPL242C | IOG1    | 4 | psiblast       | 1nf1A_  | 195 |
| YPL242C | IOG1    | 5 | unassigned     | na      | 81  |
| YPL242C | IOG1    | 6 | msa            | na      | 246 |
| YPL243W | SRP68   | 1 | msa            | na      | 96  |
| YPL243W | SRP68   | 2 | unassigned     | na      | 131 |
| YPL243W | SRP68   | 3 | msa            | na      | 372 |
| YPL244C | HUT1    | 1 | unassigned     | na      | 73  |
| YPL244C | HUT1    | 2 | msa            | na      | 266 |
| YPL245W | YPL245W | 1 | msa            | na      | 214 |
| YPL245W | YPL245W | 2 | unassigned     | na      | 65  |
| YPL245W | YPL245W | 3 | msa            | na      | 123 |
| YPL245W | YPL245W | 4 | unassigned     | na      | 52  |
| YPL246C | RBD2    | 1 | pfam           | PF01694 | 262 |
| YPL247C | YPL247C | 1 | psiblast       | 1gxrA_  | 122 |
| YPL247C | YPL247C | 2 | psiblast       | 1gg2B_  | 401 |
| YPL248C | GAL4    | 1 | psiblast       | 1d66A_  | 65  |
| YPL248C | GAL4    | 2 | pfam           | PF03902 | 60  |
| YPL248C | GAL4    | 3 | msa            | na      | 366 |
| YPL248C | GAL4    | 4 | unassigned     | na      | 106 |
| YPL248C | GAL4    | 5 | msa            | na      | 284 |

|           |         |   |            |         |     |
|-----------|---------|---|------------|---------|-----|
| YPL249C   | GYP5    | 1 | msa        | na      | 412 |
| YPL249C   | GYP5    | 2 | psiblast   | 1fkmA_  | 225 |
| YPL249C   | GYP5    | 3 | psiblast   | 1i84S_  | 176 |
| YPL249C   | GYP5    | 4 | unassigned | na      | 81  |
| YPL249C-A | RPL36B  | 1 | pfam       | PF01158 | 100 |
| YPL250C   | ICY2    | 1 | unassigned | na      | 136 |
| YPL251W   | YPL251W | 1 | unassigned | na      | 100 |
| YPL252C   | YAH1    | 1 | psiblast   | 1cqxA_  | 51  |
| YPL252C   | YAH1    | 2 | psiblast   | 1l6uA_  | 121 |
| YPL253C   | VIK1    | 1 | psiblast   | 1i84S_  | 345 |
| YPL253C   | VIK1    | 2 | psiblast   | 2tmaA_  | 61  |
| YPL253C   | VIK1    | 3 | psiblast   | 2tmaA_  | 60  |
| YPL253C   | VIK1    | 4 | psiblast   | 2tmaA_  | 98  |
| YPL253C   | VIK1    | 5 | unassigned | na      | 83  |
| YPL254W   | HFI1    | 1 | msa        | na      | 322 |
| YPL254W   | HFI1    | 2 | unassigned | na      | 166 |
| YPL255W   | BBP1    | 1 | unassigned | na      | 232 |
| YPL255W   | BBP1    | 2 | msa        | na      | 153 |
| YPL256C   | CLN2    | 1 | psiblast   | 1vin__  | 168 |
| YPL256C   | CLN2    | 2 | psiblast   | 1vin__  | 148 |
| YPL256C   | CLN2    | 3 | unassigned | na      | 229 |
| YPL257W   | YPL257W | 1 | unassigned | na      | 193 |
| YPL258C   | THI21   | 1 | psiblast   | 1jxhA_  | 319 |
| YPL258C   | THI21   | 2 | pfam       | PF03070 | 232 |
| YPL259C   | APM1    | 1 | psiblast   | 1gw5M_  | 143 |
| YPL259C   | APM1    | 2 | psiblast   | 1gw5M_  | 332 |
| YPL260W   | YPL260W | 1 | msa        | na      | 159 |
| YPL260W   | YPL260W | 2 | unassigned | na      | 104 |
| YPL260W   | YPL260W | 3 | msa        | na      | 288 |
| YPL261C   | YPL261C | 1 | unassigned | na      | 102 |
| YPL262W   | FUM1    | 1 | psiblast   | 1yfm__  | 326 |
| YPL262W   | FUM1    | 2 | psiblast   | 1yfm__  | 102 |
| YPL262W   | FUM1    | 3 | psiblast   | 1yfm__  | 60  |
| YPL263C   | KEL3    | 1 | psiblast   | 1gof__  | 420 |
| YPL263C   | KEL3    | 2 | msa        | na      | 148 |
| YPL263C   | KEL3    | 3 | unassigned | na      | 83  |
| YPL264C   | YPL264C | 1 | pfam       | PF00892 | 174 |
| YPL264C   | YPL264C | 2 | pfam       | PF00892 | 179 |
| YPL265W   | DIP5    | 1 | unassigned | na      | 81  |
| YPL265W   | DIP5    | 2 | pfam       | PF00324 | 527 |
| YPL266W   | DIM1    | 1 | psiblast   | 1yub__  | 215 |
| YPL266W   | DIM1    | 2 | psiblast   | 1yub__  | 103 |
| YPL267W   | YPL267W | 1 | unassigned | na      | 209 |
| YPL268W   | PLC1    | 1 | unassigned | na      | 86  |
| YPL268W   | PLC1    | 2 | psiblast   | 1mai__  | 138 |
| YPL268W   | PLC1    | 3 | psiblast   | 1djgA_  | 145 |
| YPL268W   | PLC1    | 4 | psiblast   | 1djgA_  | 357 |
| YPL268W   | PLC1    | 5 | psiblast   | 1djgA_  | 143 |

|           |           |   |            |         |     |
|-----------|-----------|---|------------|---------|-----|
| YPL269W   | KAR9      | 1 | unassigned | na      | 341 |
| YPL269W   | KAR9      | 2 | msa        | na      | 303 |
| YPL270W   | MDL2      | 1 | unassigned | na      | 134 |
| YPL270W   | MDL2      | 2 | psiblast   | 1jsqA_  | 321 |
| YPL270W   | MDL2      | 3 | psiblast   | 1jsqA_  | 297 |
| YPL270W   | MDL2      | 4 | unassigned | na      | 68  |
| YPL271W   | ATP15     | 1 | psiblast   | 1e79I_  | 62  |
| YPL272C   | YPL272C   | 1 | unassigned | na      | 517 |
| YPL273W   | SAM4      | 1 | psiblast   | 1lt8A_  | 325 |
| YPL274W   | SAM3      | 1 | unassigned | na      | 56  |
| YPL274W   | SAM3      | 2 | pfam       | PF00324 | 531 |
| YPL275W   | FDH2      | 1 | psiblast   | 2nacA_  | 186 |
| YPL275W   | FDH2      | 2 | psiblast   | 2nacA_  | 50  |
| YPL276W   | FDH2      | 1 | psiblast   | 2nacA_  | 145 |
| YPL277C   | YPL277C   | 1 | unassigned | na      | 487 |
| YPL278C   | YPL278C   | 1 | unassigned | na      | 100 |
| YPL279C   | YPL279C   | 1 | unassigned | na      | 171 |
| YPL279C   | YPL279C   | 2 | pfam       | PF02537 | 204 |
| YPL280W   | HSP32     | 1 | psiblast   | 1n57A_  | 237 |
| YPR001W   | CIT3      | 1 | psiblast   | 1cts__  | 379 |
| YPR001W   | CIT3      | 2 | psiblast   | 1cts__  | 107 |
| YPR002C-A | YPR002C-A | 1 | unassigned | na      | 65  |
| YPR002W   | PDH1      | 1 | pfam       | PF03972 | 516 |
| YPR003C   | YPR003C   | 1 | unassigned | na      | 90  |
| YPR003C   | YPR003C   | 2 | msa        | na      | 105 |
| YPR003C   | YPR003C   | 3 | pfam       | PF00916 | 359 |
| YPR003C   | YPR003C   | 4 | unassigned | na      | 59  |
| YPR003C   | YPR003C   | 5 | psiblast   | 1auz__  | 141 |
| YPR004C   | YPR004C   | 1 | psiblast   | 1efvA_  | 212 |
| YPR004C   | YPR004C   | 2 | psiblast   | 1efvA_  | 132 |
| YPR005C   | HAL1      | 1 | unassigned | na      | 294 |
| YPR006C   | ICL2      | 1 | psiblast   | 1dquA_  | 460 |
| YPR006C   | ICL2      | 2 | psiblast   | 1dquA_  | 115 |
| YPR007C   | REC8      | 1 | unassigned | na      | 680 |
| YPR008W   | HAA1      | 1 | psiblast   | 1co4A_  | 84  |
| YPR008W   | HAA1      | 2 | unassigned | na      | 610 |
| YPR009W   | SUT2      | 1 | unassigned | na      | 268 |
| YPR010C   | RPA135    | 1 | msa        | na      | 895 |
| YPR010C   | RPA135    | 2 | unassigned | na      | 82  |
| YPR010C   | RPA135    | 3 | msa        | na      | 94  |
| YPR010C   | RPA135    | 4 | msa        | na      | 132 |
| YPR011C   | YPR011C   | 1 | pfam       | PF00153 | 117 |
| YPR011C   | YPR011C   | 2 | pfam       | PF00153 | 111 |
| YPR011C   | YPR011C   | 3 | pfam       | PF00153 | 98  |
| YPR012W   | YPR012W   | 1 | unassigned | na      | 84  |
| YPR013C   | YPR013C   | 1 | msa        | na      | 191 |
| YPR013C   | YPR013C   | 2 | psiblast   | 1ubdC_  | 126 |
| YPR014C   | YPR014C   | 1 | unassigned | na      | 109 |

|           |           |   |            |         |     |
|-----------|-----------|---|------------|---------|-----|
| YPR015C   | YPR015C   | 1 | msa        | na      | 132 |
| YPR015C   | YPR015C   | 2 | psiblast   | 1ubdC_  | 115 |
| YPR016C   | TIF6      | 1 | psiblast   | 1g62A_  | 245 |
| YPR016W-A | YPR016W-A | 1 | unassigned | na      | 86  |
| YPR017C   | DSS4      | 1 | unassigned | na      | 143 |
| YPR018W   | RLF2      | 1 | psiblast   | 1i84S_  | 264 |
| YPR018W   | RLF2      | 2 | msa        | na      | 219 |
| YPR018W   | RLF2      | 3 | unassigned | na      | 123 |
| YPR019W   | CDC54     | 1 | msa        | na      | 181 |
| YPR019W   | CDC54     | 2 | psiblast   | 1ltIA_  | 125 |
| YPR019W   | CDC54     | 3 | psiblast   | 1ltIA_  | 168 |
| YPR019W   | CDC54     | 4 | psiblast   | 1ltIA_  | 52  |
| YPR019W   | CDC54     | 5 | psiblast   | 1g8pA_  | 229 |
| YPR019W   | CDC54     | 6 | psiblast   | 1g8pA_  | 87  |
| YPR019W   | CDC54     | 7 | unassigned | na      | 91  |
| YPR020W   | ATP20     | 1 | unassigned | na      | 115 |
| YPR021C   | AGC1      | 1 | msa        | na      | 150 |
| YPR021C   | AGC1      | 2 | psiblast   | 1vrkA_  | 93  |
| YPR021C   | AGC1      | 3 | psiblast   | 1vrkA_  | 100 |
| YPR021C   | AGC1      | 4 | unassigned | na      | 131 |
| YPR021C   | AGC1      | 5 | msa        | na      | 370 |
| YPR021C   | AGC1      | 6 | unassigned | na      | 58  |
| YPR022C   | YPR022C   | 1 | psiblast   | 2adr__  | 95  |
| YPR022C   | YPR022C   | 2 | msa        | na      | 275 |
| YPR022C   | YPR022C   | 3 | unassigned | na      | 101 |
| YPR022C   | YPR022C   | 4 | msa        | na      | 524 |
| YPR022C   | YPR022C   | 5 | unassigned | na      | 138 |
| YPR023C   | EAF3      | 1 | unassigned | na      | 94  |
| YPR023C   | EAF3      | 2 | msa        | na      | 307 |
| YPR024W   | YME1      | 1 | msa        | na      | 182 |
| YPR024W   | YME1      | 2 | unassigned | na      | 72  |
| YPR024W   | YME1      | 3 | psiblast   | 1lv7A_  | 193 |
| YPR024W   | YME1      | 4 | psiblast   | 1lv7A_  | 105 |
| YPR024W   | YME1      | 5 | msa        | na      | 80  |
| YPR024W   | YME1      | 6 | msa        | na      | 115 |
| YPR025C   | CCL1      | 1 | psiblast   | 1jkw__  | 259 |
| YPR025C   | CCL1      | 2 | psiblast   | 1jkw__  | 134 |
| YPR026W   | ATH1      | 1 | unassigned | na      | 103 |
| YPR026W   | ATH1      | 2 | psiblast   | 1h54B_  | 336 |
| YPR026W   | ATH1      | 3 | psiblast   | 1h54B_  | 479 |
| YPR026W   | ATH1      | 4 | unassigned | na      | 293 |
| YPR027C   | YPR027C   | 1 | unassigned | na      | 277 |
| YPR028W   | YOP1      | 1 | pfam       | PF03134 | 180 |
| YPR029C   | APL4      | 1 | psiblast   | 1gw5A_  | 104 |
| YPR029C   | APL4      | 2 | psiblast   | 1gw5A_  | 74  |
| YPR029C   | APL4      | 3 | psiblast   | 1gw5A_  | 159 |
| YPR029C   | APL4      | 4 | psiblast   | 1gw5A_  | 70  |
| YPR029C   | APL4      | 5 | psiblast   | 1gw5A_  | 127 |

|         |         |   |                |         |     |
|---------|---------|---|----------------|---------|-----|
| YPR029C | APL4    | 6 | msa            | na      | 154 |
| YPR029C | APL4    | 7 | psiblast       | 1iu1A_  | 144 |
| YPR030W | CSR2    | 1 | unassigned     | na      | 268 |
| YPR030W | CSR2    | 2 | msa            | na      | 281 |
| YPR030W | CSR2    | 3 | psiblast       | 1g4mA_  | 242 |
| YPR030W | CSR2    | 4 | unassigned     | na      | 330 |
| YPR031W | NTO1    | 1 | msa            | na      | 257 |
| YPR031W | NTO1    | 2 | psiblast       | 1f62A_  | 59  |
| YPR031W | NTO1    | 3 | msa            | na      | 66  |
| YPR031W | NTO1    | 4 | msa            | na      | 219 |
| YPR031W | NTO1    | 5 | psiblast       | 1jm4B_  | 147 |
| YPR032W | SRO7    | 1 | psiblast       | 1erjA_  | 338 |
| YPR032W | SRO7    | 2 | psiblast       | 1c5kA_  | 113 |
| YPR032W | SRO7    | 3 | msa            | na      | 172 |
| YPR032W | SRO7    | 4 | msa            | na      | 91  |
| YPR032W | SRO7    | 5 | msa            | na      | 319 |
| YPR033C | HTS1    | 1 | psiblast       | 1kmmA_  | 421 |
| YPR033C | HTS1    | 2 | psiblast       | 1kmmA_  | 125 |
| YPR034W | ARP7    | 1 | psiblast       | 1yagA_  | 183 |
| YPR034W | ARP7    | 2 | psiblast       | 1yagA_  | 294 |
| YPR035W | GLN1    | 1 | psiblast       | 1f1hA_  | 106 |
| YPR035W | GLN1    | 2 | psiblast       | 1f1hA_  | 152 |
| YPR035W | GLN1    | 3 | psiblast       | 1f1hA_  | 112 |
| YPR036W | VMA13   | 1 | psiblast       | 1ho8A_  | 158 |
| YPR036W | VMA13   | 2 | psiblast       | 1ho8A_  | 81  |
| YPR036W | VMA13   | 3 | psiblast       | 1ho8A_  | 114 |
| YPR036W | VMA13   | 4 | psiblast       | 1ho8A_  | 125 |
| YPR037C | ERV2    | 1 | psiblast       | 1jr8A_  | 196 |
| YPR038W | YPR038W | 1 | unassigned     | na      | 119 |
| YPR039W | YPR039W | 1 | unassigned     | na      | 111 |
| YPR040W | TIP41   | 1 | unassigned     | na      | 54  |
| YPR040W | TIP41   | 2 | msa            | na      | 245 |
| YPR040W | TIP41   | 3 | unassigned     | na      | 57  |
| YPR041W | TIF5    | 1 | psiblast       | 1k8bA_  | 95  |
| YPR041W | TIF5    | 2 | psiblast       | 1k81A_  | 38  |
| YPR041W | TIF5    | 3 | msa            | na      | 148 |
| YPR041W | TIF5    | 4 | pfam           | PF02020 | 124 |
| YPR042C | PUF2    | 1 | msa            | na      | 279 |
| YPR042C | PUF2    | 2 | pfam           | PF00076 | 175 |
| YPR042C | PUF2    | 3 | unassigned     | na      | 57  |
| YPR042C | PUF2    | 4 | psiblast       | 1ib2A_  | 139 |
| YPR042C | PUF2    | 5 | psiblast       | 1ib2A_  | 101 |
| YPR042C | PUF2    | 6 | psiblast       | 1ib2A_  | 148 |
| YPR042C | PUF2    | 7 | unassigned     | na      | 176 |
| YPR044C | YPR044C | 1 | unassigned     | na      | 117 |
| YPR045C | YPR045C | 1 | unassigned     | na      | 192 |
| YPR045C | YPR045C | 2 | pfam           | PF03399 | 278 |
| YPR046W | MCM16   | 1 | fold_recogniti | 1bgd_   | 181 |



|         |         |   |            |         |     |
|---------|---------|---|------------|---------|-----|
| YPR047W | MSF1    | 1 | psiblast   | 1b70A_  | 283 |
| YPR047W | MSF1    | 2 | pfam       | PF01409 | 83  |
| YPR047W | MSF1    | 3 | pfam       | PF03147 | 108 |
| YPR048W | TAH18   | 1 | psiblast   | 1amoA_  | 187 |
| YPR048W | TAH18   | 2 | psiblast   | 1amoA_  | 177 |
| YPR048W | TAH18   | 3 | psiblast   | 1amoA_  | 103 |
| YPR048W | TAH18   | 4 | psiblast   | 1amoA_  | 156 |
| YPR049C | ATG11   | 1 | psiblast   | 1i84S_  | 376 |
| YPR049C | ATG11   | 2 | unassigned | na      | 106 |
| YPR049C | ATG11   | 3 | psiblast   | 2tmaA_  | 71  |
| YPR049C | ATG11   | 4 | psiblast   | 2tmaA_  | 83  |
| YPR049C | ATG11   | 5 | psiblast   | 2tmaA_  | 62  |
| YPR049C | ATG11   | 6 | psiblast   | 2tmaA_  | 70  |
| YPR049C | ATG11   | 7 | psiblast   | 1jchA_  | 157 |
| YPR049C | ATG11   | 8 | msa        | na      | 253 |
| YPR050C | YPR050C | 1 | unassigned | na      | 137 |
| YPR051W | MAK3    | 1 | psiblast   | 1mk4A_  | 176 |
| YPR052C | NHP6A   | 1 | psiblast   | 1cg7A_  | 93  |
| YPR053C | YPR053C | 1 | unassigned | na      | 151 |
| YPR054W | SMK1    | 1 | psiblast   | 1erk__  | 142 |
| YPR054W | SMK1    | 2 | psiblast   | 1erk__  | 246 |
| YPR055W | SEC8    | 1 | psiblast   | 1i84S_  | 320 |
| YPR055W | SEC8    | 2 | msa        | na      | 227 |
| YPR055W | SEC8    | 3 | msa        | na      | 130 |
| YPR055W | SEC8    | 4 | unassigned | na      | 67  |
| YPR055W | SEC8    | 5 | msa        | na      | 269 |
| YPR055W | SEC8    | 6 | unassigned | na      | 52  |
| YPR056W | TFB4    | 1 | pfam       | PF03850 | 338 |
| YPR057W | BRR1    | 1 | unassigned | na      | 341 |
| YPR058W | YMC1    | 1 | pfam       | PF00153 | 115 |
| YPR058W | YMC1    | 2 | pfam       | PF00153 | 96  |
| YPR058W | YMC1    | 3 | pfam       | PF00153 | 96  |
| YPR059C | YPR059C | 1 | unassigned | na      | 128 |
| YPR060C | ARO7    | 1 | psiblast   | 2csmA_  | 256 |
| YPR061C | JID1    | 1 | psiblast   | 1xbl__  | 198 |
| YPR061C | JID1    | 2 | unassigned | na      | 103 |
| YPR062W | FCY1    | 1 | psiblast   | 1uaqA_  | 158 |
| YPR063C | YPR063C | 1 | unassigned | na      | 140 |
| YPR064W | YPR064W | 1 | unassigned | na      | 139 |
| YPR065W | ROX1    | 1 | psiblast   | 1gtOD_  | 92  |
| YPR065W | ROX1    | 2 | msa        | na      | 276 |
| YPR066W | UBA3    | 1 | psiblast   | 1ngvB_  | 171 |
| YPR066W | UBA3    | 2 | psiblast   | 1ngvB_  | 56  |
| YPR066W | UBA3    | 3 | psiblast   | 1ngvB_  | 72  |
| YPR067W | ISA2    | 1 | psiblast   | 1nwbA_  | 185 |
| YPR068C | HOS1    | 1 | unassigned | na      | 74  |
| YPR068C | HOS1    | 2 | psiblast   | 1c3pA_  | 164 |
| YPR068C | HOS1    | 3 | psiblast   | 1c3pA_  | 232 |

|           |           |   |                |         |     |
|-----------|-----------|---|----------------|---------|-----|
| YPR069C   | SPE3      | 1 | psiblast       | 1inIA_  | 65  |
| YPR069C   | SPE3      | 2 | psiblast       | 1inIA_  | 228 |
| YPR070W   | MED1      | 1 | unassigned     | na      | 566 |
| YPR071W   | YPR071W   | 1 | msa            | na      | 211 |
| YPR072W   | NOT5      | 1 | psiblast       | 1i84S_  | 260 |
| YPR072W   | NOT5      | 2 | msa            | na      | 300 |
| YPR073C   | LTP1      | 1 | psiblast       | 1d1pA_  | 161 |
| YPR074C   | TKL1      | 1 | psiblast       | 1gpuA_  | 291 |
| YPR074C   | TKL1      | 2 | psiblast       | 1gpuA_  | 49  |
| YPR074C   | TKL1      | 3 | psiblast       | 1gpuA_  | 242 |
| YPR074C   | TKL1      | 4 | psiblast       | 1gpuA_  | 98  |
| YPR074W-A | YPR074W-A | 1 | unassigned     | na      | 56  |
| YPR075C   | OPY2      | 1 | msa            | na      | 247 |
| YPR075C   | OPY2      | 2 | unassigned     | na      | 113 |
| YPR076W   | YPR076W   | 1 | unassigned     | na      | 124 |
| YPR077C   | YPR077C   | 1 | unassigned     | na      | 123 |
| YPR078C   | YPR078C   | 1 | unassigned     | na      | 372 |
| YPR079W   | MRL1      | 1 | unassigned     | na      | 59  |
| YPR079W   | MRL1      | 2 | psiblast       | 1c39A_  | 170 |
| YPR079W   | MRL1      | 3 | psiblast       | 1e6fA_  | 152 |
| YPR081C   | GRS2      | 1 | psiblast       | 1atiA_  | 427 |
| YPR081C   | GRS2      | 2 | psiblast       | 1atiA_  | 122 |
| YPR081C   | GRS2      | 3 | psiblast       | 1nj8A_  | 69  |
| YPR082C   | DIB1      | 1 | psiblast       | 1qgvA_  | 143 |
| YPR083W   | MDM36     | 1 | unassigned     | na      | 378 |
| YPR083W   | MDM36     | 2 | msa            | na      | 201 |
| YPR084W   | YPR084W   | 1 | unassigned     | na      | 456 |
| YPR085C   | YPR085C   | 1 | fold_recogniti | 1erjA   | 448 |
| YPR086W   | SUA7      | 1 | psiblast       | 1dl6A_  | 72  |
| YPR086W   | SUA7      | 2 | psiblast       | 1c9bA_  | 160 |
| YPR086W   | SUA7      | 3 | psiblast       | 1c9bA_  | 113 |
| YPR087W   | VPS69     | 1 | unassigned     | na      | 106 |
| YPR088C   | SRP54     | 1 | psiblast       | 1j8mF_  | 89  |
| YPR088C   | SRP54     | 2 | psiblast       | 1j8mF_  | 230 |
| YPR088C   | SRP54     | 3 | psiblast       | 1mfqC_  | 89  |
| YPR088C   | SRP54     | 4 | psiblast       | 1m2vB_  | 133 |
| YPR089W   | YPR089W   | 1 | unassigned     | na      | 155 |
| YPR090W   | 6281      | 1 | msa            | na      | 334 |
| YPR090W   | 6281      | 2 | unassigned     | na      | 402 |
| YPR091C   | YPR091C   | 1 | unassigned     | na      | 109 |
| YPR091C   | YPR091C   | 2 | pfam           | PF00169 | 158 |
| YPR091C   | YPR091C   | 3 | msa            | na      | 324 |
| YPR091C   | YPR091C   | 4 | unassigned     | na      | 179 |
| YPR092W   | YPR092W   | 1 | unassigned     | na      | 101 |
| YPR093C   | YPR093C   | 1 | psiblast       | 1jm7A_  | 111 |
| YPR093C   | YPR093C   | 2 | unassigned     | na      | 59  |
| YPR093C   | YPR093C   | 3 | msa            | na      | 140 |
| YPR094W   | RDS3      | 1 | pfam           | PF03660 | 107 |

|         |         |   |                |         |     |
|---------|---------|---|----------------|---------|-----|
| YPR095C | SYT1    | 1 | msa            | na      | 408 |
| YPR095C | SYT1    | 2 | psiblast       | 1bc9__  | 81  |
| YPR095C | SYT1    | 3 | psiblast       | 1bc9__  | 199 |
| YPR095C | SYT1    | 4 | unassigned     | na      | 538 |
| YPR096C | YPR096C | 1 | unassigned     | na      | 100 |
| YPR097W | YPR097W | 1 | unassigned     | na      | 232 |
| YPR097W | YPR097W | 2 | pfam           | PF00787 | 272 |
| YPR097W | YPR097W | 3 | msa            | na      | 413 |
| YPR097W | YPR097W | 4 | unassigned     | na      | 156 |
| YPR098C | YPR098C | 1 | unassigned     | na      | 108 |
| YPR099C | YPR099C | 1 | unassigned     | na      | 118 |
| YPR100W | MRPL51  | 1 | unassigned     | na      | 140 |
| YPR101W | SNT309  | 1 | unassigned     | na      | 175 |
| YPR102C | RPL11A  | 1 | psiblast       | 1ffkD_  | 174 |
| YPR103W | PRE2    | 1 | unassigned     | na      | 65  |
| YPR103W | PRE2    | 2 | psiblast       | 1g0uK_  | 222 |
| YPR104C | FHL1    | 1 | msa            | na      | 235 |
| YPR104C | FHL1    | 2 | fold_recogniti | 1gxcA   | 187 |
| YPR104C | FHL1    | 3 | psiblast       | 1d5vA_  | 159 |
| YPR104C | FHL1    | 4 | unassigned     | na      | 56  |
| YPR104C | FHL1    | 5 | fold_recogniti | 1l8mA   | 76  |
| YPR104C | FHL1    | 6 | fold_recogniti | 1l8mA   | 78  |
| YPR104C | FHL1    | 7 | fold_recogniti | 1l8mA   | 70  |
| YPR104C | FHL1    | 8 | fold_recogniti | 1l8mA   | 75  |
| YPR105C | COG4    | 1 | psiblast       | 1i84S_  | 228 |
| YPR105C | COG4    | 2 | unassigned     | na      | 330 |
| YPR105C | COG4    | 3 | msa            | na      | 303 |
| YPR106W | ISR1    | 1 | unassigned     | na      | 76  |
| YPR106W | ISR1    | 2 | psiblast       | 1f3mC_  | 156 |
| YPR106W | ISR1    | 3 | psiblast       | 1f3mC_  | 211 |
| YPR107C | YTH1    | 1 | psiblast       | 1m9oA_  | 120 |
| YPR107C | YTH1    | 2 | msa            | na      | 88  |
| YPR108W | RPN7    | 1 | msa            | na      | 90  |
| YPR108W | RPN7    | 2 | psiblast       | 1na0A_  | 181 |
| YPR108W | RPN7    | 3 | msa            | na      | 158 |
| YPR109W | YPR109W | 1 | unassigned     | na      | 294 |
| YPR110C | RPC40   | 1 | psiblast       | 1i3qC_  | 270 |
| YPR110C | RPC40   | 2 | psiblast       | 1i3qC_  | 65  |
| YPR111W | DBF20   | 1 | psiblast       | 1ctpE_  | 284 |
| YPR111W | DBF20   | 2 | psiblast       | 1ctpE_  | 140 |
| YPR112C | MRD1    | 1 | psiblast       | 1fj7A_  | 113 |
| YPR112C | MRD1    | 2 | msa            | na      | 203 |
| YPR112C | MRD1    | 3 | psiblast       | 1cvjA_  | 107 |
| YPR112C | MRD1    | 4 | psiblast       | 1cvjA_  | 105 |
| YPR112C | MRD1    | 5 | psiblast       | 1fjeB_  | 99  |
| YPR112C | MRD1    | 6 | psiblast       | 1l3kA_  | 127 |
| YPR112C | MRD1    | 7 | psiblast       | 1l3kA_  | 133 |
| YPR113W | PIS1    | 1 | pfam           | PF01066 | 220 |

|           |         |   |            |         |     |
|-----------|---------|---|------------|---------|-----|
| YPR114W   | YPR114W | 1 | unassigned | na      | 77  |
| YPR114W   | YPR114W | 2 | msa        | na      | 238 |
| YPR115W   | YPR115W | 1 | unassigned | na      | 475 |
| YPR115W   | YPR115W | 2 | pfam       | PF00169 | 272 |
| YPR115W   | YPR115W | 3 | unassigned | na      | 336 |
| YPR116W   | YPR116W | 1 | unassigned | na      | 277 |
| YPR117W   | YPR117W | 1 | unassigned | na      | 739 |
| YPR117W   | YPR117W | 2 | msa        | na      | 736 |
| YPR117W   | YPR117W | 3 | unassigned | na      | 225 |
| YPR117W   | YPR117W | 4 | msa        | na      | 235 |
| YPR117W   | YPR117W | 5 | msa        | na      | 502 |
| YPR117W   | YPR117W | 6 | unassigned | na      | 52  |
| YPR118W   | YPR118W | 1 | pfam       | PF01008 | 411 |
| YPR119W   | CLB2    | 1 | msa        | na      | 223 |
| YPR119W   | CLB2    | 2 | psiblast   | 1vin__  | 147 |
| YPR119W   | CLB2    | 3 | psiblast   | 1vin__  | 121 |
| YPR120C   | CLB5    | 1 | msa        | na      | 137 |
| YPR120C   | CLB5    | 2 | psiblast   | 1vin__  | 173 |
| YPR120C   | CLB5    | 3 | psiblast   | 1vin__  | 125 |
| YPR121W   | THI22   | 1 | psiblast   | 1jxhA_  | 320 |
| YPR121W   | THI22   | 2 | msa        | na      | 252 |
| YPR122W   | AXL1    | 1 | psiblast   | 1hr6B_  | 273 |
| YPR122W   | AXL1    | 2 | psiblast   | 1hr6B_  | 198 |
| YPR122W   | AXL1    | 3 | unassigned | na      | 97  |
| YPR122W   | AXL1    | 4 | msa        | na      | 443 |
| YPR122W   | AXL1    | 5 | msa        | na      | 110 |
| YPR122W   | AXL1    | 6 | unassigned | na      | 87  |
| YPR123C   | YPR123C | 1 | unassigned | na      | 144 |
| YPR124W   | CTR1    | 1 | msa        | na      | 185 |
| YPR124W   | CTR1    | 2 | unassigned | na      | 221 |
| YPR125W   | YPR125W | 1 | msa        | na      | 354 |
| YPR125W   | YPR125W | 2 | unassigned | na      | 100 |
| YPR126C   | YPR126C | 1 | unassigned | na      | 102 |
| YPR127W   | YPR127W | 1 | psiblast   | 1exbA_  | 270 |
| YPR127W   | YPR127W | 2 | psiblast   | 1exbA_  | 75  |
| YPR128C   | ANT1    | 1 | pfam       | PF00153 | 112 |
| YPR128C   | ANT1    | 2 | pfam       | PF00153 | 103 |
| YPR128C   | ANT1    | 3 | pfam       | PF00153 | 113 |
| YPR129W   | SCD6    | 1 | msa        | na      | 189 |
| YPR129W   | SCD6    | 2 | msa        | na      | 160 |
| YPR130C   | YPR130C | 1 | unassigned | na      | 135 |
| YPR131C   | NAT3    | 1 | psiblast   | 1i1dA_  | 251 |
| YPR133C   | IWS1    | 1 | msa        | na      | 227 |
| YPR133C   | IWS1    | 2 | unassigned | na      | 53  |
| YPR133C   | IWS1    | 3 | msa        | na      | 130 |
| YPR133W-A | TOM5    | 1 | unassigned | na      | 50  |
| YPR134W   | MSS18   | 1 | unassigned | na      | 268 |
| YPR135W   | CTF4    | 1 | psiblast   | 1erjA_  | 348 |

|         |         |   |                |         |     |
|---------|---------|---|----------------|---------|-----|
| YPR135W | CTF4    | 2 | psiblast       | 1l0qA_  | 120 |
| YPR135W | CTF4    | 3 | unassigned     | na      | 70  |
| YPR135W | CTF4    | 4 | msa            | na      | 256 |
| YPR135W | CTF4    | 5 | unassigned     | na      | 133 |
| YPR136C | YPR136C | 1 | unassigned     | na      | 170 |
| YPR137W | RRP9    | 1 | unassigned     | na      | 59  |
| YPR137W | RRP9    | 2 | psiblast       | 1nexB_  | 81  |
| YPR137W | RRP9    | 3 | psiblast       | 1nexB_  | 294 |
| YPR137W | RRP9    | 4 | psiblast       | 1erjA_  | 68  |
| YPR137W | RRP9    | 5 | unassigned     | na      | 71  |
| YPR138C | MEP3    | 1 | pfam           | PF00909 | 489 |
| YPR139C | VPS66   | 1 | msa            | na      | 205 |
| YPR139C | VPS66   | 2 | unassigned     | na      | 95  |
| YPR140W | TAZ1    | 1 | psiblast       | 1k30A_  | 329 |
| YPR140W | TAZ1    | 2 | unassigned     | na      | 52  |
| YPR141C | KAR3    | 1 | psiblast       | 1i84S_  | 371 |
| YPR141C | KAR3    | 2 | psiblast       | 1f9tA_  | 358 |
| YPR142C | YPR142C | 1 | unassigned     | na      | 187 |
| YPR143W | YPR143W | 1 | fold_recogniti | 1c1gA   | 59  |
| YPR143W | YPR143W | 2 | fold_recogniti | 1c1gA   | 191 |
| YPR144C | NOC4    | 1 | fold_recogniti | 1b3uA_  | 425 |
| YPR144C | NOC4    | 2 | unassigned     | na      | 127 |
| YPR145W | ASN1    | 1 | psiblast       | 1ct9A_  | 192 |
| YPR145W | ASN1    | 2 | psiblast       | 1ct9A_  | 380 |
| YPR146C | YPR146C | 1 | unassigned     | na      | 109 |
| YPR147C | YPR147C | 1 | msa            | na      | 118 |
| YPR147C | YPR147C | 2 | msa            | na      | 186 |
| YPR148C | YPR148C | 1 | msa            | na      | 294 |
| YPR148C | YPR148C | 2 | unassigned     | na      | 141 |
| YPR149W | NCE102  | 1 | unassigned     | na      | 173 |
| YPR150W | YPR150W | 1 | unassigned     | na      | 173 |
| YPR151C | SUE1    | 1 | msa            | na      | 206 |
| YPR152C | YPR152C | 1 | psiblast       | 1o6wA_  | 96  |
| YPR152C | YPR152C | 2 | unassigned     | na      | 78  |
| YPR152C | YPR152C | 3 | psiblast       | 1h40A_  | 138 |
| YPR152C | YPR152C | 4 | unassigned     | na      | 153 |
| YPR153W | YPR153W | 1 | unassigned     | na      | 144 |
| YPR154W | PIN3    | 1 | psiblast       | 1griA_  | 122 |
| YPR154W | PIN3    | 2 | msa            | na      | 93  |
| YPR155C | NCA2    | 1 | unassigned     | na      | 212 |
| YPR155C | NCA2    | 2 | msa            | na      | 404 |
| YPR156C | TPO3    | 1 | msa            | na      | 163 |
| YPR156C | TPO3    | 2 | pfam           | PF00083 | 459 |
| YPR157W | YPR157W | 1 | unassigned     | na      | 100 |
| YPR157W | YPR157W | 2 | msa            | na      | 367 |
| YPR158W | YPR158W | 1 | msa            | na      | 252 |
| YPR159W | KRE6    | 1 | unassigned     | na      | 206 |
| YPR159W | KRE6    | 2 | pfam           | PF03935 | 71  |

|           |           |   |            |        |      |
|-----------|-----------|---|------------|--------|------|
| YPR159W   | KRE6      | 3 | psiblast   | 1dypA_ | 274  |
| YPR159W   | KRE6      | 4 | psiblast   | 1macA_ | 169  |
| YPR160W   | GPH1      | 1 | psiblast   | 1a8i__ | 556  |
| YPR160W   | GPH1      | 2 | psiblast   | 1a8i__ | 346  |
| YPR161C   | SGV1      | 1 | psiblast   | 1aq1__ | 151  |
| YPR161C   | SGV1      | 2 | psiblast   | 1aq1__ | 153  |
| YPR161C   | SGV1      | 3 | psiblast   | 1aq1__ | 51   |
| YPR161C   | SGV1      | 4 | psiblast   | 1aq1__ | 73   |
| YPR161C   | SGV1      | 5 | unassigned | na     | 229  |
| YPR162C   | ORC4      | 1 | psiblast   | 1lv7A_ | 278  |
| YPR162C   | ORC4      | 2 | psiblast   | 1lv7A_ | 93   |
| YPR162C   | ORC4      | 3 | msa        | na     | 158  |
| YPR163C   | TIF3      | 1 | psiblast   | 2up1A_ | 92   |
| YPR163C   | TIF3      | 2 | psiblast   | 1cvjA_ | 125  |
| YPR163C   | TIF3      | 3 | psiblast   | 1cvjA_ | 119  |
| YPR163C   | TIF3      | 4 | unassigned | na     | 100  |
| YPR164W   | MMS1      | 1 | unassigned | na     | 1407 |
| YPR165W   | RHO1      | 1 | psiblast   | 1lb1B_ | 209  |
| YPR166C   | MRP2      | 1 | psiblast   | 1p87N_ | 115  |
| YPR167C   | MET16     | 1 | psiblast   | 1sur__ | 261  |
| YPR168W   | NUT2      | 1 | unassigned | na     | 157  |
| YPR169W   | JIP5      | 1 | psiblast   | 1k8kC_ | 380  |
| YPR169W   | JIP5      | 2 | psiblast   | 1gg2B_ | 134  |
| YPR170C   | YPR170C   | 1 | unassigned | na     | 111  |
| YPR170W-A | YPR170W-A | 1 | unassigned | na     | 61   |
| YPR171W   | BSP1      | 1 | unassigned | na     | 97   |
| YPR171W   | BSP1      | 2 | msa        | na     | 367  |
| YPR171W   | BSP1      | 3 | msa        | na     | 112  |
| YPR172W   | YPR172W   | 1 | unassigned | na     | 200  |
| YPR173C   | VPS4      | 1 | msa        | na     | 96   |
| YPR173C   | VPS4      | 2 | psiblast   | 1e32A_ | 202  |
| YPR173C   | VPS4      | 3 | psiblast   | 1e32A_ | 75   |
| YPR173C   | VPS4      | 4 | unassigned | na     | 64   |
| YPR174C   | YPR174C   | 1 | unassigned | na     | 83   |
| YPR174C   | YPR174C   | 2 | msa        | na     | 138  |
| YPR175W   | DPB2      | 1 | unassigned | na     | 498  |
| YPR175W   | DPB2      | 2 | msa        | na     | 194  |
| YPR176C   | BET2      | 1 | psiblast   | 1dceB_ | 178  |
| YPR176C   | BET2      | 2 | psiblast   | 1dceB_ | 147  |
| YPR177C   | YPR177C   | 1 | unassigned | na     | 123  |
| YPR178W   | PRP4      | 1 | psiblast   | 1l0qA_ | 126  |
| YPR178W   | PRP4      | 2 | psiblast   | 1gg2B_ | 339  |
| YPR179C   | HDA3      | 1 | psiblast   | 2mysA_ | 241  |
| YPR179C   | HDA3      | 2 | unassigned | na     | 121  |
| YPR179C   | HDA3      | 3 | psiblast   | 1c1gA_ | 64   |
| YPR179C   | HDA3      | 4 | psiblast   | 1c1gA_ | 229  |
| YPR180W   | AOS1      | 1 | psiblast   | 1ngvA_ | 170  |
| YPR180W   | AOS1      | 2 | psiblast   | 1ngvA_ | 177  |

|         |         |   |            |         |     |
|---------|---------|---|------------|---------|-----|
| YPR181C | SEC23   | 1 | psiblast   | 1m2oA_  | 646 |
| YPR181C | SEC23   | 2 | psiblast   | 1m2oA_  | 122 |
| YPR182W | SMX3    | 1 | psiblast   | 1i81A_  | 86  |
| YPR183W | DPM1    | 1 | psiblast   | 1h7IA_  | 125 |
| YPR183W | DPM1    | 2 | msa        | na      | 142 |
| YPR184W | GDB1    | 1 | psiblast   | 1j0hA_  | 110 |
| YPR184W | GDB1    | 2 | psiblast   | 1j0hA_  | 334 |
| YPR184W | GDB1    | 3 | unassigned | na      | 95  |
| YPR184W | GDB1    | 4 | msa        | na      | 273 |
| YPR184W | GDB1    | 5 | unassigned | na      | 115 |
| YPR184W | GDB1    | 6 | msa        | na      | 609 |
| YPR185W | ATG13   | 1 | unassigned | na      | 90  |
| YPR185W | ATG13   | 2 | msa        | na      | 154 |
| YPR185W | ATG13   | 3 | msa        | na      | 356 |
| YPR185W | ATG13   | 4 | unassigned | na      | 138 |
| YPR186C | PZF1    | 1 | psiblast   | 1ubdC_  | 188 |
| YPR186C | PZF1    | 2 | msa        | na      | 162 |
| YPR186C | PZF1    | 3 | unassigned | na      | 79  |
| YPR187W | RPO26   | 1 | psiblast   | 1i3qF_  | 155 |
| YPR188C | MLC2    | 1 | psiblast   | 1iq5A_  | 88  |
| YPR188C | MLC2    | 2 | psiblast   | 1iq5A_  | 75  |
| YPR189W | SKI3    | 1 | msa        | na      | 179 |
| YPR189W | SKI3    | 2 | msa        | na      | 207 |
| YPR189W | SKI3    | 3 | psiblast   | 1fchA_  | 346 |
| YPR189W | SKI3    | 4 | psiblast   | 1na0A_  | 117 |
| YPR189W | SKI3    | 5 | unassigned | na      | 86  |
| YPR189W | SKI3    | 6 | psiblast   | 1d8dA_  | 214 |
| YPR189W | SKI3    | 7 | psiblast   | 1elrA_  | 72  |
| YPR189W | SKI3    | 8 | msa        | na      | 211 |
| YPR190C | RPC82   | 1 | msa        | na      | 144 |
| YPR190C | RPC82   | 2 | unassigned | na      | 128 |
| YPR190C | RPC82   | 3 | msa        | na      | 382 |
| YPR191W | QCR2    | 1 | psiblast   | 1ezvB_  | 193 |
| YPR191W | QCR2    | 2 | psiblast   | 1ezvB_  | 175 |
| YPR192W | AQY1    | 1 | psiblast   | 1fqyA_  | 165 |
| YPR192W | AQY1    | 2 | psiblast   | 1fqyA_  | 140 |
| YPR193C | HPA2    | 1 | psiblast   | 1qsmA_  | 156 |
| YPR195C | YPR195C | 1 | unassigned | na      | 109 |
| YPR196W | YPR196W | 1 | psiblast   | 1d66A_  | 56  |
| YPR196W | YPR196W | 2 | msa        | na      | 234 |
| YPR196W | YPR196W | 3 | unassigned | na      | 180 |
| YPR197C | YPR197C | 1 | unassigned | na      | 187 |
| YPR198W | SGE1    | 1 | pfam       | PF00083 | 428 |
| YPR198W | SGE1    | 2 | msa        | na      | 115 |
| YPR199C | ARR1    | 1 | psiblast   | 1gd2E_  | 136 |
| YPR199C | ARR1    | 2 | unassigned | na      | 158 |
| YPR200C | ARR2    | 1 | psiblast   | 1cwtA_  | 130 |
| YPR201W | ARR3    | 1 | unassigned | na      | 66  |

|         |         |              |         |     |
|---------|---------|--------------|---------|-----|
| YPR201W | ARR3    | 2 pfam       | PF01758 | 211 |
| YPR201W | ARR3    | 3 msa        | na      | 127 |
| YPR202W | YPR202W | 1 msa        | na      | 238 |
| YPR203W | YPR203W | 1 unassigned | na      | 102 |
| YPR204W | YPR204W | 1 psiblast   | 1fuuA_  | 392 |
| YPR204W | YPR204W | 2 msa        | na      | 346 |
| YPR204W | YPR204W | 3 unassigned | na      | 294 |
