# Supplementary material
Source: PubMed Central journal article supplement (PMC1852132)
Supplement: pbio.0050076.st002.pdf [file pbio.0050076.st002.pdf]

| ac        | gene_name | domain_nr | MCM score | scs description                                                           |
|-----------|-----------|-----------|-----------|---------------------------------------------------------------------------|
| YMR225C   | MRPL44    | 1         | 0.8500161 | SH2 domain                                                                |
| YCL056C   | YCL056C   | 1         | 0.901412  | t-snare proteins                                                          |
| YCR020C-A | MAK31     | 1         | 0.8052541 | L30e-like                                                                 |
| YBR253W   | SRB6      | 1         | 0.8380764 | t-snare proteins                                                          |
| YLR204W   | QRI5      | 1         | 0.9001616 | Succinate dehydrogenase/fumarate reductase flavoprotein C-terminal domain |
| YFL010W-A | AUA1      | 1         | 0.8709216 | HSC20 (HSCB), C-terminal oligomerisation domain                           |
| YAR030C   | YAR030C   | 1         | 0.8047973 | Cytochromes                                                               |
| YAR053W   | YAR053W   | 1         | 0.9471299 | Translation initiation factor IF3, C-terminal domain                      |
| YKL224C   | YKL224C   | 1         | 0.8935874 | Acyl-CoA dehydrogenase C-terminal domain-like                             |
| YKL123W   | YKL123W   | 1         | 0.8383844 | Fertilization protein                                                     |
| YKL137W   | YKL137W   | 1         | 0.9478462 | Hemerythrin                                                               |
| YBL077W   | YBL077W   | 1         | 0.8216679 | SGNH hydrolase                                                            |
| YIL176C   | YIL176C   | 1         | 0.9538127 | Glutathione S-transferase (GST), C-terminal domain                        |
| YJL067W   | YJL067W   | 1         | 0.8415872 | C-terminal effector domain of the bipartite response regulators           |
| YBR301W   | DAN3      | 1         | 0.8022961 | Acyl-CoA dehydrogenase C-terminal domain-like                             |
| YJL199C   | MBB1      | 1         | 0.8364534 | Quinohemoprotein amine dehydrogenase A chain, domain 3                    |
| YIL141W   | YIL141W   | 1         | 0.8364395 | t-snare proteins                                                          |
| YIL012W   | YIL012W   | 1         | 0.8565117 | Neurotransmitter-gated ion-channel transmembrane pore                     |
| YFL020C   | PAU5      | 1         | 0.8256845 | alpha-catenin/vinculin                                                    |
| YML089C   | YML089C   | 1         | 0.8014963 | Neurotransmitter-gated ion-channel transmembrane pore                     |
| YAL064W   | YAL064W   | 1         | 0.8301918 | Group V grass pollen allergen                                             |
| YAL045C   | YAL045C   | 1         | 0.9116643 | Hemerythrin                                                               |
| YEL008W   | YEL008W   | 1         | 0.8104104 | Cyclin-like                                                               |
| YHL046C   | YHL046C   | 1         | 0.82386   | Acyl-CoA dehydrogenase C-terminal domain-like                             |
| YLR325C   | RPL38     | 1         | 0.8578486 | RNA 3'-terminal phosphate cyclase, RPTC, insert domain                    |
| YDR134C   | YDR134C   | 1         | 0.8450396 | Alpha-lytic protease prodomain                                            |
| YMR007W   | YMR007W   | 1         | 0.8019607 | t-snare proteins                                                          |
| YMR325W   | YMR325W   | 1         | 0.919294  | Ferritin-like                                                             |
| YGL239C   | YGL239C   | 1         | 0.8759231 | Ribosomal protein S20                                                     |
| YDR016C   | DAD1      | 1         | 0.9345842 | Neurotransmitter-gated ion-channel transmembrane pore                     |
| YDL170W   | UGA3      | 3         | 0.887551  | Cyclin-like                                                               |
| YPRO20W   | ATP20     | 1         | 0.9237924 | Globin-like                                                               |
| YNL086W   | YNL086W   | 1         | 0.813412  | F1FO ATP synthase subunit C                                               |
| YDR511W   | ACN9      | 1         | 0.873999  | Ribosomal protein S5 domain 2-like                                        |

|           |           |   |           |                                                                             |
|-----------|-----------|---|-----------|-----------------------------------------------------------------------------|
| YHR039C-A | VMA10     | 1 | 0.9407527 | t-snare proteins                                                            |
| YJL188C   | BUD19     | 1 | 0.9145571 | Cyclin-like                                                                 |
| YJR067C   | YAE1      | 1 | 0.8588077 | Apolipoprotein III                                                          |
| YJR071W   | YJR071W   | 1 | 0.8922787 | Enzyme IIa from lactose specific PTS, IIa-lac                               |
| YJR079W   | YJR079W   | 1 | 0.8073631 | Spectrin repeat                                                             |
| YDL158C   | YDL158C   | 1 | 0.9395859 | Enzyme IIa from lactose specific PTS, IIa-lac                               |
| YMR321C   | YMR321C   | 1 | 0.8286087 | PreATP-grasp domain                                                         |
| YHLO46W-A | YHLO46W-A | 1 | 0.8477858 | Mechanosensitive channel protein MscS (YggB), transmembrane region          |
| YHLO06W-A | YHLO06W-A | 1 | 0.801192  | Globin-like                                                                 |
| YAL068C   | YAL068C   | 1 | 0.8397204 | Ferritin-like                                                               |
| YDR542W   | YDR542W   | 1 | 0.830162  | Ferritin-like                                                               |
| YLR112W   | YLR112W   | 1 | 0.8534201 | Globin-like                                                                 |
| YLL025W   | YLL025W   | 1 | 0.8464268 | Acyl-CoA dehydrogenase C-terminal domain-like                               |
| YGL121C   | GPG1      | 1 | 0.934683  | TPR-like                                                                    |
| YGR011W   | YGR011W   | 1 | 0.9032881 | FAT domain of focal adhesion kinase                                         |
| YGR050C   | YGR050C   | 1 | 0.9255073 | Cyclin-like                                                                 |
| YGR151C   | YGR151C   | 1 | 0.8087466 | Sigma2 domain of RNA polymerase sigma factors                               |
| YGR182C   | YGR182C   | 1 | 0.8673217 | Ribosomal protein S20                                                       |
| YGR294W   | YGR294W   | 1 | 0.857793  | Acyl-CoA dehydrogenase C-terminal domain-like                               |
| YDR286C   | YDR286C   | 1 | 0.8651624 | Thioredoxin-like                                                            |
| YLR012C   | YLR012C   | 1 | 0.8107106 | HSC20 (HSCB), C-terminal oligomerisation domain                             |
| YFL034C-A | RPL22B    | 1 | 0.8548544 | Acylphosphatase-like                                                        |
| YPL144W   | YPL144W   | 1 | 0.8182168 | Flavoproteins                                                               |
| YOL118C   | YOL118C   | 1 | 0.9642878 | Subdomain of clathrin and coatamer appendage domain                         |
| YOL134C   | YOL134C   | 1 | 0.9434323 | Voltage-gated potassium channels                                            |
| YOR072W   | YOR072W   | 1 | 0.9163313 | Hemerythrin                                                                 |
| YOR200W   | YOR200W   | 1 | 0.8008774 | ARM repeat                                                                  |
| YOR300W   | YOR300W   | 1 | 0.8921667 | Enzyme IIa from lactose specific PTS, IIa-lac                               |
| YOR366W   | YOR366W   | 1 | 0.93792   | Cytochromes                                                                 |
| YLR202C   | YLR202C   | 1 | 0.831457  | DNA polymerase III clamp loader subunits, C-terminal domain                 |
| YLR255C   | YLR255C   | 1 | 0.8582043 | FKBP12-rapamycin-binding domain of FKBP-rapamycin-associated protein (FRAP) |
| YLR317W   | YLR317W   | 1 | 0.8079231 | Pili subunits                                                               |
| YPL035C   | YPL035C   | 1 | 0.8522011 | Nucleotidyltransferase substrate binding subunit/domain                     |
| YPL102C   | YPL102C   | 1 | 0.9616348 | Cytochromes                                                                 |
| YPR096C   | YPR096C   | 1 | 0.8722385 | tRNA-intron endonuclease catalytic domain-like                              |

|           |           |   |           |                                                                              |
|-----------|-----------|---|-----------|------------------------------------------------------------------------------|
| YPR146C   | YPR146C   | 1 | 0.8451808 | Enzyme IIa from lactose specific PTS, IIa-lac                                |
| YLR235C   | YLR235C   | 1 | 0.9248184 | F1FO ATP synthase subunit C                                                  |
| YDLO45W-A | MRP10     | 1 | 0.9161435 | Domain of the SRP/SRP receptor G-proteins                                    |
| YELO20W-A | TIM9      | 1 | 0.8811445 | DEATH domain                                                                 |
| YDR322C-A | TIM11     | 1 | 0.8580783 | t-snare proteins                                                             |
| YER048W-A | YER048W-A | 1 | 0.8590212 | Saposin                                                                      |
| YHR072W-A | NOP10     | 1 | 0.8286719 |                                                                              |
| YDR079C-A | YDR079C-A | 1 | 0.9157771 | CheY-binding domain of CheA                                                  |
| YDR379C-A | YDR379C-A | 1 | 0.8581252 | Ribosomal protein S20                                                        |
| YOL086W-A | YOL086W-A | 1 | 0.9272228 | Chemotaxis receptor methyltransferase CheR, N-terminal domain                |
| YBL071W-A | KTI11     | 1 | 0.8784145 | N-utilization substance G protein NusG, insert domain                        |
| YDL185C-A | YDL185C-A | 1 | 0.8902787 | Anticodon-binding domain of a subclass of class I aminoacyl-tRNA synthetases |
| YNR001W-A | YNR001W-A | 1 | 0.9639813 | ACT-like                                                                     |
| YML019W   | OST6      | 1 | 0.8310058 | Saposin                                                                      |
| YDL240W   | LRG1      | 3 | 0.959994  | Succinate dehydrogenase/fumarate reductase flavoprotein C-terminal domain    |
| YDL240W   | LRG1      | 4 | 0.9507163 | t-snare proteins                                                             |
| YOL051W   | GAL11     | 3 | 0.8937189 | Enzyme IIa from lactose specific PTS, IIa-lac                                |
| YHR070W   | TRM5      | 4 | 0.9036459 | Aminoacid dehydrogenase-like, N-terminal domain                              |
| YML095C   | RAD10     | 1 | 0.8689633 |                                                                              |
| YDL059C   | RAD59     | 2 | 0.8245387 | dsRNA-binding domain-like                                                    |
| YBR079C   | RPG1      | 4 | 0.8724772 | HMA, heavy metal-associated domain                                           |
| YHR077C   | NMD2      | 2 | 0.8714656 | C-terminal domain of RNA polymerase alpha subunit                            |
| YER015W   | FAA2      | 1 | 0.8546869 | S13-like H2TH domain                                                         |
| YDR449C   | UTP6      | 4 | 0.8282438 | DNA polymerase beta-like, second domain                                      |
| YBR286W   | APE3      | 1 | 0.8161709 |                                                                              |
| YLR425W   | TUS1      | 2 | 0.8616455 | Origin of replication-binding domain, RBD-like                               |
| YBR058C   | UBP14     | 4 | 0.892164  | TPR-like                                                                     |
| YNL053W   | MSG5      | 3 | 0.8511909 | Domain of the SRP/SRP receptor G-proteins                                    |
| YDR379W   | RGA2      | 5 | 0.8983544 | FAT domain of focal adhesion kinase                                          |
| YLR151C   | PCD1      | 2 | 0.9046461 | F-box domain                                                                 |
| YBR276C   | PPS1      | 2 | 0.8808284 | TPR-like                                                                     |
| YGR277C   | YGR277C   | 1 | 0.8888104 | Anticodon-binding domain of Class II aaRS                                    |
| YBR229C   | ROT2      | 1 | 0.9326923 | ClpS-like                                                                    |
| YHR117W   | TOM71     | 5 | 0.8741559 | TPR-like                                                                     |
| YGL035C   | MIG1      | 3 | 0.8536502 | HMA, heavy metal-associated domain                                           |

|         |         |   |           |                                                                              |
|---------|---------|---|-----------|------------------------------------------------------------------------------|
| YGL206C | CHC1    | 9 | 0.8434813 | Ribosomal protein L22                                                        |
| YJR066W | TOR1    | 8 | 0.9068531 | Cytochrome c oxidase subunit E                                               |
| YDR335W | MSN5    | 3 | 0.8965996 | Methionine synthase domain                                                   |
| YDR335W | MSN5    | 4 | 0.8620366 | BAG domain                                                                   |
| YLR291C | GCD7    | 1 | 0.9395466 | TPR-like                                                                     |
| YAL013W | DEP1    | 2 | 0.9551276 | DBL homology domain (DH-domain)                                              |
| YAR062W | YAR062W | 2 | 0.8131105 | Carboxypeptidase regulatory domain                                           |
| YBL023C | MCM2    | 3 | 0.8167756 | Cytochrome c oxidase subunit E                                               |
| YBL042C | FUI1    | 1 | 0.8473574 | Anticodon-binding domain of a subclass of class I aminoacyl-tRNA synthetases |
| YBL105C | PKC1    | 1 | 0.8795691 | Small-conductance potassium channel                                          |
| YBR102C | EXO84   | 2 | 0.8184288 | Spectrin repeat                                                              |
| YBR111C | YSA1    | 1 | 0.8906018 | Amine oxidase N-terminal region                                              |
| YBR192W | RIM2    | 3 | 0.9565296 | HSC20 (HSCB), C-terminal oligomerisation domain                              |
| YBR208C | DUR1,2  | 8 | 0.8095037 | Aminoacid dehydrogenase-like, N-terminal domain                              |
| YBR245C | ISW1    | 1 | 0.8205161 | Nucleotidyltransferase substrate binding subunit/domain                      |
| YBR291C | CTP1    | 2 | 0.8480396 | Group V grass pollen allergen                                                |
| YBR295W | PCA1    | 3 | 0.8012953 | GlnB-like                                                                    |
| YCL031C | RRP7    | 2 | 0.9027887 | Ferritin-like                                                                |
| YCR037C | PHO87   | 2 | 0.8191776 | Saposin                                                                      |
| YDL037C | BSC1    | 1 | 0.8849834 | SH3-domain                                                                   |
| YDL070W | BDF2    | 5 | 0.8073258 | Bacterial immunoglobulin/albumin-binding domains                             |
| YDL093W | PMT5    | 2 | 0.8772479 | Complement control module/SCR domain                                         |
| YDL095W | PMT1    | 2 | 0.8680828 | Complement control module/SCR domain                                         |
| YDL119C | YDL119C | 1 | 0.8560971 |                                                                              |
| YDR036C | EHD3    | 4 | 0.8289086 | p8-MTCP1                                                                     |
| YDR068W | DOS2    | 2 | 0.8609879 | 6-phosphogluconate dehydrogenase C-terminal domain-like                      |
| YDR081C | PDC2    | 5 | 0.8877515 | Enzyme IIa from lactose specific PTS, IIa-lac                                |
| YDR087C | RRP1    | 1 | 0.8426341 | ARM repeat                                                                   |
| YDR122W | KIN1    | 4 | 0.8840306 | alpha-2-Macroglobulin receptor associated protein (RAP) domain 1             |
| YDR124W | YDR124W | 1 | 0.9636502 | Probable ACP-binding domain of malonyl-CoA ACP transacylase                  |
| YDR265W | PEX10   | 1 | 0.8876452 | Glutathione S-transferase (GST), C-terminal domain                           |
| YDR283C | GCN2    | 2 | 0.8443807 | Ribosomal protein L20                                                        |
| YDR289C | RTT103  | 1 | 0.8708721 | Methionine synthase domain                                                   |
| YGL076C | RPL7A   | 1 | 0.9196403 | Enzyme IIa from lactose specific PTS, IIa-lac                                |
| YGL159W | YGL159W | 1 | 0.8276263 | Winged helix DNA-binding domain                                              |

|         |           |   |           |                                                                              |
|---------|-----------|---|-----------|------------------------------------------------------------------------------|
| YGL171W | ROK1      | 4 | 0.9497807 | Conserved domain common to transcription factors TFIIIS, elongin A, CRSP70   |
| YIR010W | DSN1      | 1 | 0.8573101 | ACT-like                                                                     |
| YHR012W | VPS29     | 2 | 0.9412826 | PUA domain-like                                                              |
| YBL022C | PIM1      | 7 | 0.8650376 | Porphobilinogen deaminase (hydroxymethylbilane synthase), C-terminal domain  |
| YBL047C | EDE1      | 8 | 0.8618831 | F1F0 ATP synthase subunit C                                                  |
| YBR203W | COS111    | 2 | 0.8432728 | Hemerythrin                                                                  |
| YBR263W | SHM1      | 1 | 0.8718294 | Enzyme IIa from lactose specific PTS, IIa-lac                                |
| YCL008C | STP22     | 2 | 0.9554952 | Anticodon-binding domain of a subclass of class I aminoacyl-tRNA synthetases |
| YCL030C | HIS4      | 2 | 0.9437147 | C-terminal domain of ProRS                                                   |
| YCL030C | HIS4      | 4 | 0.9070026 | Group V grass pollen allergen                                                |
| YCL048W | YCL048W   | 3 | 0.8081712 | DNA helicase RuvA subunit, C-terminal domain                                 |
| YCL067C | HMLALPHA2 | 1 | 0.9941406 | t-snare proteins                                                             |
| YCR059C | YIH1      | 2 | 0.8646185 | Cytidine deaminase-like                                                      |
| YDL028C | MPS1      | 3 | 0.8592224 | TrpR-like                                                                    |
| YDL038C | YDL038C   | 2 | 0.8345791 | SirA-like                                                                    |
| YDL040C | NAT1      | 4 | 0.9452862 | TPR-like                                                                     |
| YDL077C | VAM6      | 2 | 0.8045683 | Polynucleotide phosphorylase/guanosine pentaphosphate synthase (PNPase/GPSI) |
| YDL077C | VAM6      | 4 | 0.8527022 | Hemerythrin                                                                  |
| YDL104C | QRI7      | 1 | 0.8864191 | RNA-binding domain, RBD                                                      |
| YDL113C | ATG20     | 3 | 0.820895  | Hemerythrin                                                                  |
| YDL234C | GYP7      | 5 | 0.8355689 | HMG-box                                                                      |
| YDR006C | SOK1      | 4 | 0.9284228 | DNA polymerase III clamp loader subunits, C-terminal domain                  |
| YDR049W | YDR049W   | 5 | 0.8814846 | HSC20 (HSCB), C-terminal oligomerisation domain                              |
| YDR090C | YDR090C   | 2 | 0.8091055 | LEM domain                                                                   |
| YDR125C | ECM18     | 1 | 0.9094613 |                                                                              |
| YDR213W | UPC2      | 4 | 0.931642  | TPR-like                                                                     |
| YDR258C | HSP78     | 1 | 0.8516331 | Winged helix DNA-binding domain                                              |
| YDR458C | YDR458C   | 3 | 0.8091979 | Bcl-2 inhibitors of programmed cell death                                    |
| YDR465C | RMT2      | 2 | 0.8727244 | Anticodon-binding domain of Class II aaRS                                    |
| YDR498C | SEC20     | 2 | 0.9726961 | tRNA-binding arm                                                             |
| YEL061C | CIN8      | 1 | 0.9554122 | Rudiment single hybrid motif                                                 |
| YER021W | RPN3      | 1 | 0.8234546 | TPR-like                                                                     |
| YER048C | CAJ1      | 3 | 0.8664393 | Cyclin-like                                                                  |
| YER060W | FCY21     | 1 | 0.9270249 | FF domain                                                                    |
| YER128W | YER128W   | 1 | 0.8502465 | Group V grass pollen allergen                                                |

|         |         |   |           |                                                                           |
|---------|---------|---|-----------|---------------------------------------------------------------------------|
| YER128W | YER128W | 2 | 0.8256895 | HSC20 (HSCB), C-terminal oligomerisation domain                           |
| YER143W | DDI1    | 2 | 0.8490885 | DEATH domain                                                              |
| YER184C | YER184C | 2 | 0.8970864 | HSC20 (HSCB), C-terminal oligomerisation domain                           |
| YFL001W | DEG1    | 4 | 0.9216408 | Mechanosensitive channel protein MscS (YggB), C-terminal domain           |
| YFL042C | YFL042C | 2 | 0.8025051 | Histone H3 K4-specific methyltransferase SET7/9 N-terminal domain         |
| YGL141W | HUL5    | 2 | 0.8718905 | Outer surface protein C (OspC)                                            |
| YGL227W | VID30   | 5 | 0.8864474 | Zinc beta-ribbon                                                          |
| YGR047C | TFC4    | 5 | 0.84476   | 6-phosphogluconate dehydrogenase C-terminal domain-like                   |
| YGR270W | YTA7    | 9 | 0.8972044 | Group V grass pollen allergen                                             |
| YHLO24W | RIM4    | 1 | 0.9155148 | Hemolysin expression modulating protein HHA                               |
| YHR066W | SSF1    | 2 | 0.8195461 | dsRNA-binding domain-like                                                 |
| YHR146W | CRP1    | 1 | 0.9692786 | Invasin/intimin cell-adhesion fragments                                   |
| YHR203C | RPS4B   | 2 | 0.8632227 | Quinohemoprotein amine dehydrogenase A chain, domain 3                    |
| YILO11W | TIR3    | 1 | 0.9246745 | Succinate dehydrogenase/fumarate reductase flavoprotein C-terminal domain |
| YILO16W | SNL1    | 2 | 0.9592668 | HSC20 (HSCB), C-terminal oligomerisation domain                           |
| YILO97W | FYV10   | 1 | 0.9787787 | Spectrin repeat                                                           |
| YIL110W | YIL110W | 1 | 0.8111381 | Phospholipase A2, PLA2                                                    |
| YIL144W | TID3    | 4 | 0.8512339 | DNA polymerase III clamp loader subunits, C-terminal domain               |
| YJL002C | OST1    | 1 | 0.8663242 | Neurotransmitter-gated ion-channel transmembrane pore                     |
| YJL065C | DLS1    | 2 | 0.8216577 |                                                                           |
| YJL149W | YJL149W | 1 | 0.8571997 | Flg                                                                       |
| YJL180C | ATP12   | 2 | 0.8179357 | Voltage-gated potassium channels                                          |
| YJL198W | PHO90   | 2 | 0.8738329 | Fatty acid responsive transcription factor FadR, C-terminal domain        |
| YJR003C | YJR003C | 3 | 0.9144265 |                                                                           |
| YJR041C | URB2    | 6 | 0.8246184 | TPR-like                                                                  |
| YKL045W | PRI2    | 1 | 0.9457604 | Gametocyte protein Pfg27                                                  |
| YLR129W | DIP2    | 3 | 0.8883723 | Scorpion toxin-like                                                       |
| YLR129W | DIP2    | 4 | 0.8893714 | Zinc beta-ribbon                                                          |
| YLR129W | DIP2    | 5 | 0.8669213 | Signal recognition particle alu RNA binding heterodimer, SRP9/14          |
| YLR222C | UTP13   | 2 | 0.9432172 | Zinc beta-ribbon                                                          |
| YOR262W | YOR262W | 2 | 0.9188342 | Phosphoglucomutase, first 3 domains                                       |
| YKR001C | VPS1    | 3 | 0.9149118 | Neurotransmitter-gated ion-channel transmembrane pore                     |
| YKR041W | YKR041W | 2 | 0.9754845 | t-snare proteins                                                          |
| YKR095W | MLP1    | 3 | 0.9751936 | t-snare proteins                                                          |
| YKR095W | MLP1    | 7 | 0.8635437 | DEATH domain                                                              |

|         |         |   |           |                                                                                |
|---------|---------|---|-----------|--------------------------------------------------------------------------------|
| YLL001W | DNM1    | 4 | 0.9619956 | tRNA-binding arm                                                               |
| YLL026W | HSP104  | 1 | 0.9712926 | Cyclin-like                                                                    |
| YLR137W | YLR137W | 2 | 0.8160349 | Macro domain-like                                                              |
| YLR176C | RFX1    | 5 | 0.9828888 | HSC20 (HSCB), C-terminal oligomerisation domain                                |
| YLR228C | ECM22   | 3 | 0.955797  | Anticodon-binding domain of a subclass of class I aminoacyl-tRNA synthetases   |
| YLR357W | RSC2    | 3 | 0.9842254 | Bromodomain                                                                    |
| YLR403W | SFP1    | 1 | 0.9418915 | Pterin-4a-carbinolamine dehydratase (PCD)/dimerization cofactor of HNF1 (DCoH) |
| YML034W | SRC1    | 4 | 0.8004288 | Spectrin repeat                                                                |
| YML068W | ITT1    | 2 | 0.840586  | Anticodon-binding domain of a subclass of class I aminoacyl-tRNA synthetases   |
| YML102W | CAC2    | 1 | 0.9367181 | Myosin S1 fragment, N-terminal domain                                          |
| YML104C | MDM1    | 3 | 0.9060428 | Ribosomal protein S20                                                          |
| YMR023C | MSS1    | 1 | 0.9174477 | GlnB-like                                                                      |
| YMR027W | YMR027W | 1 | 0.8593547 | Glutathione S-transferase (GST), C-terminal domain                             |
| YMR027W | YMR027W | 2 | 0.9319933 | BAG domain                                                                     |
| YMR069W | NAT4    | 1 | 0.8348828 | Globin-like                                                                    |
| YMR203W | TOM40   | 2 | 0.8856672 | Immunoglobulin-binding domains                                                 |
| YNL014W | HEF3    | 2 | 0.9416687 | Anticodon-binding domain of a subclass of class I aminoacyl-tRNA synthetases   |
| YNL041C | COG6    | 3 | 0.8756553 | Ribosomal protein S20                                                          |
| YNL051W | COG5    | 1 | 0.9071597 | STAT                                                                           |
| YHR107C | CDC12   | 2 | 0.9269455 | Smac/diablo                                                                    |
| YNL022C | YNL022C | 1 | 0.970272  | DNA polymerase III clamp loader subunits, C-terminal domain                    |
| YNL083W | YNL083W | 3 | 0.8633557 |                                                                                |
| YNL201C | PSY2    | 2 | 0.8685044 | Anaphylotoxins (complement system)                                             |
| YNL201C | PSY2    | 5 | 0.8420155 | DNA polymerase III clamp loader subunits, C-terminal domain                    |
| YNR060W | FRE4    | 6 | 0.8327289 | SirA-like                                                                      |
| YNR070W | YNR070W | 2 | 0.812975  |                                                                                |
| YOL015W | YOL015W | 1 | 0.841856  | Enzyme IIa from lactose specific PTS, IIa-lac                                  |
| YOL089C | HAL9    | 3 | 0.8295168 | Nucleoside phosphorylase/phosphoribosyltransferase N-terminal domain           |
| YOR001W | RRP6    | 3 | 0.949215  | Cyclin-like                                                                    |
| YDR146C | SWI5    | 1 | 0.857895  | Glucose permease domain IIB                                                    |
| YDR174W | HMO1    | 1 | 0.9322783 | Tubulin chaperone cofactor A                                                   |
| YNL234W | YNL234W | 3 | 0.8162249 | Anaphylotoxins (complement system)                                             |
| YOL147C | PEX11   | 2 | 0.8874784 | t-snare proteins                                                               |
| YOR206W | NOC2    | 2 | 0.8297047 | ARM repeat                                                                     |
| YOR230W | WTM1    | 1 | 0.8586761 | Carboxypeptidase regulatory domain                                             |

|           |         |    |           |                                                                              |
|-----------|---------|----|-----------|------------------------------------------------------------------------------|
| YOR295W   | UAF30   | 1  | 0.8548579 | Nucleoside phosphorylase/phosphoribosyltransferase N-terminal domain         |
| YDR152W   | GIR2    | 2  | 0.9008706 | Ferritin-like                                                                |
| YDR198C   | YDR198C | 2  | 0.938088  | alpha-ketoacid dehydrogenase kinase, N-terminal domain                       |
| YDR200C   | VPS64   | 2  | 0.9214186 | Immunoglobulin-binding domains                                               |
| YDR532C   | YDR532C | 1  | 0.820245  | Glutathione S-transferase (GST), C-terminal domain                           |
| YEL007W   | YEL007W | 4  | 0.8623422 | Interleukin 8-like chemokines                                                |
| YER060W-A | FCY22   | 1  | 0.8291569 | FF domain                                                                    |
| YER112W   | LSM4    | 2  | 0.8189611 | RuvA domain 2-like                                                           |
| YER140W   | YER140W | 2  | 0.8157977 | F1FO ATP synthase subunit C                                                  |
| YER144C   | UBP5    | 1  | 0.9770273 | alpha-catenin/vinculin                                                       |
| YER144C   | UBP5    | 2  | 0.823573  | P-loop containing nucleoside triphosphate hydrolases                         |
| YER144C   | UBP5    | 6  | 0.8728158 | Rudiment single hybrid motif                                                 |
| YER144C   | UBP5    | 7  | 0.9088517 | Zinc beta-ribbon                                                             |
| YER164W   | CHD1    | 11 | 0.9315958 | Enzyme IIa from lactose specific PTS, IIa-lac                                |
| YFR004W   | RPN11   | 3  | 0.9291744 | HR1 repeat                                                                   |
| YFR021W   | ATG18   | 1  | 0.912833  | Invasin/intimin cell-adhesion fragments                                      |
| YFR023W   | PES4    | 1  | 0.8061702 | PGBD-like                                                                    |
| YFR023W   | PES4    | 6  | 0.908654  | Aminoacid dehydrogenase-like, N-terminal domain                              |
| YFR052W   | RPN12   | 1  | 0.8649605 | alpha-catenin/vinculin                                                       |
| YGL062W   | PYC1    | 7  | 0.8465603 | Translation proteins SH3-like domain                                         |
| YGL086W   | MAD1    | 6  | 0.836577  | Ferritin-like                                                                |
| YGL246C   | RAI1    | 2  | 0.8012532 | RNA-binding domain, RBD                                                      |
| YGL256W   | ADH4    | 1  | 0.8441637 | F1FO ATP synthase subunit C                                                  |
| YGR062C   | COX18   | 1  | 0.8693236 | Transducin (alpha subunit), insertion domain                                 |
| YGR103W   | NOP7    | 2  | 0.8094338 | SAM/Pointed domain                                                           |
| YGR119C   | NUP57   | 3  | 0.9165855 | Ferritin-like                                                                |
| YGR199W   | PMT6    | 2  | 0.8909677 | Complement control module/SCR domain                                         |
| YGR200C   | ELP2    | 4  | 0.8971821 | Immunoglobulin                                                               |
| YGR208W   | SER2    | 1  | 0.8469606 | EF-G C-terminal domain-like                                                  |
| YGR210C   | YGR210C | 3  | 0.8570886 | CBS-domain                                                                   |
| YHR069C   | RRP4    | 3  | 0.830134  | Polynucleotide phosphorylase/guanosine pentaphosphate synthase (PNPase/GPSI) |
| YHR188C   | GPI16   | 1  | 0.8309189 | Prokaryotic type KH domain (KH-domain type II)                               |
| YIL073C   | SPO22   | 6  | 0.8765613 | Prokaryotic type KH domain (KH-domain type II)                               |
| YIL147C   | SLN1    | 5  | 0.8058374 | PTS system, Lactose/Cellobiose specific IIB subunit (Pfam 02302)             |
| YIL155C   | GUT2    | 3  | 0.82938   | Bifunctional inhibitor/lipid-transfer protein/seed storage 2S albumin        |



|         |         |   |           |                                                                                |
|---------|---------|---|-----------|--------------------------------------------------------------------------------|
| YIL177C | YIL177C | 3 | 0.8449964 | Globin-like                                                                    |
| YIR004W | DJP1    | 4 | 0.9784976 | Group V grass pollen allergen                                                  |
| YJL044C | GYP6    | 4 | 0.8043367 | Anticodon-binding domain of a subclass of class I aminoacyl-tRNA synthetases   |
| YJL090C | DPB11   | 4 | 0.8415452 | ACT-like                                                                       |
| YJL110C | GZF3    | 4 | 0.8066248 | Nucleoside phosphorylase/phosphoribosyltransferase N-terminal domain           |
| YJL140W | RPB4    | 1 | 0.8927559 | t-snare proteins                                                               |
| YJL225C | YJL225C | 3 | 0.9467272 | Fatty acid responsive transcription factor FadR, C-terminal domain             |
| YJL225C | YJL225C | 6 | 0.8292633 | SAM/Pointed domain                                                             |
| YJR073C | OPI3    | 1 | 0.812691  | Enzyme IIa from lactose specific PTS, IIa-lac                                  |
| YJR144W | MGM101  | 1 | 0.8235488 | SirA-like                                                                      |
| YKL020C | SPT23   | 3 | 0.8904563 | Fibronectin type III                                                           |
| YKL035W | UGP1    | 1 | 0.8513054 | Calponin-homology domain, CH-domain                                            |
| YKL040C | NFU1    | 2 | 0.9788899 | Multidrug efflux transporter AcrB pore domain; PN1, PN2, PC1 and PC2 subdomain |
| YKLO52C | ASK1    | 1 | 0.8216234 | lambda integrase-like, N-terminal domain                                       |
| YKL187C | YKL187C | 3 | 0.8463651 | Domain of the SRP/SRP receptor G-proteins                                      |
| YKL203C | TOR2    | 6 | 0.8981829 | ENTH/VHS domain                                                                |
| YKR086W | PRP16   | 3 | 0.8683447 |                                                                                |
| YKR098C | UBP11   | 1 | 0.8394411 | PABC (PABP) domain                                                             |
| YLL005C | SPO75   | 2 | 0.8710116 | t-snare proteins                                                               |
| YLR067C | PET309  | 2 | 0.8742474 | TPR-like                                                                       |
| YLR181C | VTA1    | 1 | 0.9551035 | Winged helix DNA-binding domain                                                |
| YLR191W | PEX13   | 2 | 0.9102088 | GAT-like domain                                                                |
| YLR292C | SEC72   | 1 | 0.9499311 | Globin-like                                                                    |
| YLR292C | SEC72   | 2 | 0.8399399 | C-terminal domain of DFF45/ICAD (DFF-C domain)                                 |
| YLR318W | EST2    | 4 | 0.9551976 | Group V grass pollen allergen                                                  |
| YLR330W | CHS5    | 1 | 0.9422031 | Ribosomal protein L6                                                           |
| YLR396C | VPS33   | 4 | 0.8320249 | tRNA-intron endonuclease catalytic domain-like                                 |
| YLR398C | SKI2    | 5 | 0.8008504 | FAD-linked reductases, C-terminal domain                                       |
| YLR431C | ATG23   | 2 | 0.9391253 | t-snare proteins                                                               |
| YML010W | SPT5    | 7 | 0.8960837 | Fibronectin type I module                                                      |
| YML010W | SPT5    | 9 | 0.9061005 | Zinc beta-ribbon                                                               |
| YML020W | YML020W | 2 | 0.9352144 | Elongation factor Ts (EF-Ts), dimerisation domain                              |
| YML035C | AMD1    | 2 | 0.9265023 | Zinc beta-ribbon                                                               |
| YML133C | YML133C | 2 | 0.9009496 | DNA polymerase III clamp loader subunits, C-terminal domain                    |
| YMR054W | STV1    | 1 | 0.8137335 | EF-hand                                                                        |

|         |         |    |           |                                                                              |
|---------|---------|----|-----------|------------------------------------------------------------------------------|
| YNL084C | END3    | 4  | 0.9238798 | tRNA-binding arm                                                             |
| YNR011C | PRP2    | 3  | 0.889332  | ARM repeat                                                                   |
| YNR063W | YNR063W | 3  | 0.8160029 | Group V grass pollen allergen                                                |
| YOL136C | PFK27   | 2  | 0.8813473 |                                                                              |
| YOL142W | RRP40   | 2  | 0.8447015 | Acylphosphatase-like                                                         |
| YOR010C | TIR2    | 1  | 0.8342172 | Anticodon-binding domain of a subclass of class I aminoacyl-tRNA synthetases |
| YOR021C | YOR021C | 1  | 0.8802431 | SirA-like                                                                    |
| YOR062C | YOR062C | 1  | 0.8195407 | Neurotransmitter-gated ion-channel transmembrane pore                        |
| YOR093C | YOR093C | 7  | 0.8372342 | Annexin                                                                      |
| YOR140W | SFL1    | 3  | 0.8613835 | tRNA-binding arm                                                             |
| YOR144C | ELG1    | 5  | 0.8400926 | Bifunctional inhibitor/lipid-transfer protein/seed storage 2S albumin        |
| YOR156C | NFI1    | 3  | 0.8420273 | Immunoglobulin-binding domains                                               |
| YOR261C | RPN8    | 1  | 0.8553643 | YjgF-like                                                                    |
| YBR136W | MEC1    | 4  | 0.8339585 | Ferritin-like                                                                |
| YBR140C | IRA1    | 4  | 0.829292  | Translational machinery components                                           |
| YER132C | PMD1    | 1  | 0.8584122 | Enolase N-terminal domain-like                                               |
| YER172C | BRR2    | 2  | 0.8313507 | Saposin                                                                      |
| YGL131C | SNT2    | 6  | 0.8274532 | Ribosomal protein L20                                                        |
| YGL195W | GCN1    | 5  | 0.9847852 | BAG domain                                                                   |
| YGR184C | UBR1    | 1  | 0.8616297 |                                                                              |
| YHL049C | YHL049C | 2  | 0.8038659 | Winged helix DNA-binding domain                                              |
| YIL115C | NUP159  | 5  | 0.8471193 | Annexin                                                                      |
| YIL130W | YIL130W | 2  | 0.8627901 | lambda integrase-like, N-terminal domain                                     |
| YIL134W | FLX1    | 3  | 0.8941778 | DEATH domain                                                                 |
| YIL137C | YIL137C | 4  | 0.8213756 | Probable ACP-binding domain of malonyl-CoA ACP transacylase                  |
| YIL137C | YIL137C | 6  | 0.8991087 | alpha-ketoacid dehydrogenase kinase, N-terminal domain                       |
| YIL149C | MLP2    | 6  | 0.9232631 | DNA polymerase beta, N-terminal domain-like                                  |
| YJR095W | SFC1    | 3  | 0.8478431 | Spectrin repeat                                                              |
| YJR111C | YJR111C | 2  | 0.9241612 | Cyclin-like                                                                  |
| YKL205W | LOS1    | 2  | 0.9174189 | Polynucleotide phosphorylase/guanosine pentaphosphate synthase (PNPase/GPS1) |
| YKL215C | YKL215C | 2  | 0.9184647 | D-aminopeptidase, middle and C-terminal domains                              |
| YKR028W | SAP190  | 5  | 0.8680031 | Eukaryotic DNA topoisomerase I, dispensable insert domain                    |
| YLL021W | SPA2    | 5  | 0.954572  | Computational models partly based on NMR data                                |
| YLL040C | VPS13   | 11 | 0.8120934 | Signal recognition particle alu RNA binding heterodimer, SRP9/14             |
| YLL040C | VPS13   | 13 | 0.8411587 | PH domain-like                                                               |

|         |         |    |           |                                                                              |
|---------|---------|----|-----------|------------------------------------------------------------------------------|
| YLR024C | UBR2    | 1  | 0.8717696 | Saposin                                                                      |
| YML059C | YML059C | 6  | 0.8390749 | Anti-sigma factor antagonist SpoIIaa                                         |
| YML072C | TCB3    | 2  | 0.8157936 | Avidin/streptavidin                                                          |
| YMR014W | BUD22   | 1  | 0.8391174 | Bromodomain                                                                  |
| YMR028W | TAP42   | 1  | 0.9426104 | Enzyme IIa from lactose specific PTS, IIa-lac                                |
| YMR031C | YMR031C | 2  | 0.807123  | Anticodon-binding domain of a subclass of class I aminoacyl-tRNA synthetases |
| YMR162C | DNF3    | 3  | 0.823674  | Winged helix DNA-binding domain                                              |
| YMR164C | MSS11   | 4  | 0.8419077 |                                                                              |
| YMR207C | HFA1    | 11 | 0.8553813 | Replisome organizer (g39p helicase loader/inhibitor protein)                 |
| YMR229C | RRP5    | 3  | 0.816214  | SH3-domain                                                                   |
| YMR239C | RNT1    | 2  | 0.8230939 | Annexin                                                                      |
| YMR288W | HSH155  | 3  | 0.9643049 | Domain of the SRP/SRP receptor G-proteins                                    |
| YMR299C | DYN3    | 1  | 0.8899595 | CheY-like                                                                    |
| YMR306W | FKS3    | 1  | 0.8312362 | Cyclin-like                                                                  |
| YMR309C | NIP1    | 3  | 0.823603  | Winged helix DNA-binding domain                                              |
| YMR317W | YMR317W | 4  | 0.8620721 | Microbial ribonucleases                                                      |
| YNL297C | MON2    | 2  | 0.854508  | Anticodon-binding domain of a subclass of class I aminoacyl-tRNA synthetases |
| YNR016C | ACC1    | 4  | 0.9586209 | beta-Barrel protease inhibitors                                              |
| YNR016C | ACC1    | 7  | 0.8665298 | Domain of the SRP/SRP receptor G-proteins                                    |
| YOR336W | KRE5    | 4  | 0.8852698 | C-terminal domain of arginine repressor                                      |
| YOR356W | YOR356W | 3  | 0.8130475 | Pili subunits                                                                |
| YOR389W | YOR389W | 2  | 0.8697974 | t-snare proteins                                                             |
| YPL020C | ULP1    | 3  | 0.9048112 | Neurotransmitter-gated ion-channel transmembrane pore                        |
| YPL072W | UBP16   | 2  | 0.805102  | SAM/Pointed domain                                                           |
| YPL078C | ATP4    | 1  | 0.900074  | BAG domain                                                                   |
| YPL082C | MOT1    | 9  | 0.8229364 | CheY-like                                                                    |
| YPL084W | BRO1    | 2  | 0.96721   | Fertilization protein                                                        |
| YPL128C | TBF1    | 1  | 0.8522214 | Globin-like                                                                  |
| YPL134C | ODC1    | 2  | 0.9385137 | HSC20 (HSCB), C-terminal oligomerisation domain                              |
| YPL154C | PEP4    | 1  | 0.8873521 | Mechanosensitive channel protein MscS (YggB), transmembrane region           |
| YPL174C | NIP100  | 2  | 0.8009328 | lambda integrase-like, N-terminal domain                                     |
| YPL198W | RPL7B   | 1  | 0.9406932 | GreA transcript cleavage protein, N-terminal domain                          |
| YPL199C | YPL199C | 1  | 0.9708753 | F1FO ATP synthase subunit C                                                  |
| YPL226W | NEW1    | 2  | 0.9652017 | ENTH/VHS domain                                                              |
| YPL243W | SRP68   | 2  | 0.9431132 | alpha-catenin/vinculin                                                       |

|         |         |   |           |                                                                           |
|---------|---------|---|-----------|---------------------------------------------------------------------------|
| YPL248C | GAL4    | 4 | 0.8745111 | F1F0 ATP synthase subunit A                                               |
| YPR011C | YPR011C | 3 | 0.8032248 | Cyclin-like                                                               |
| YPR019W | CDC54   | 7 | 0.8054829 | SirA-like                                                                 |
| YPR022C | YPR022C | 5 | 0.9008338 | ENTH/VHS domain                                                           |
| YPR032W | SRO7    | 4 | 0.8768658 | Immunoglobulin                                                            |
| YPR041W | TIF5    | 4 | 0.8892932 | Globin-like                                                               |
| YPR049C | ATG11   | 2 | 0.9612743 | t-snare proteins                                                          |
| YPR055W | SEC8    | 3 | 0.9181923 | FAT domain of focal adhesion kinase                                       |
| YPR058W | YMC1    | 1 | 0.8303617 | Succinate dehydrogenase/fumarate reductase flavoprotein C-terminal domain |
| YPR061C | JID1    | 2 | 0.8238815 | DNA polymerase III clamp loader subunits, C-terminal domain               |
| YPR093C | YPR093C | 3 | 0.8922738 | Cytochromes                                                               |
| YOR124C | UBP2    | 2 | 0.8933772 | ENTH/VHS domain                                                           |
| YPR128C | ANT1    | 3 | 0.8448585 | F1F0 ATP synthase subunit C                                               |
| YPR135W | CTF4    | 3 | 0.8027644 | Translation proteins SH3-like domain                                      |
| YPR135W | CTF4    | 5 | 0.8819868 | Acyl-CoA dehydrogenase C-terminal domain-like                             |
| YPR139C | VPS66   | 2 | 0.8720207 | CheY-like                                                                 |
| YPR173C | VPS4    | 1 | 0.9750281 | t-snare proteins                                                          |
| YPR190C | RPC82   | 1 | 0.8423688 | ARID-like                                                                 |
| YLR263W | RED1    | 5 | 0.9655801 | DNA polymerase III clamp loader subunits, C-terminal domain               |
| YIL072W | HOP1    | 2 | 0.8276    | HMA, heavy metal-associated domain                                        |
