# Supplementary material
Source: PubMed Central journal article supplement (PMC1852132)
Supplement: pbio.0050076.st004.pdf [file pbio.0050076.st004.pdf]

| pdb     | native sccs | length | convergence | lowest rms in | lowest rms in | MCM score  | MCM sccs   | score |
|---------|-------------|--------|-------------|---------------|---------------|------------|------------|-------|
| 1dlwa   | a.1.1.1     | 116    | 4.7         | 3.87          | 4.32          | 0.99890784 | a.1.1.1    | 5     |
| 1kr7a   | a.1.1.4     | 110    | 3.1         | 3.51          | 4.61          | 0.99442452 | a.1.1.2    | 3     |
| 1nekb   | a.1.2.1     | 132    | 9.54        | 7.02          | 9.58          | 0.54485293 | a.74.1.1   | 1     |
| 1qlab   | a.1.2.1     | 133    | 9.61        | 8.49          | 8.56          | 0.59667794 | a.1.2.1    | 5     |
| 1hd6a   | a.10.1.1    | 37     | 2.68        | 3.1           | 4.45          | 0.34815738 | a.10.1.1   | 5     |
| 1erp_   | a.10.1.1    | 38     | 1.8         | 3.92          | 7.58          | 0.30010057 | a.140.2.1  | 1     |
| 1f0ya   | a.100.1.3   | 99     | 5.79        | 5.37          | 8.8           | 0.77579808 | a.100.1.3  | 5     |
| 1dlja   | a.100.1.4   | 98     | 3.96        | 6.64          | 9.7           | 0.37713609 | a.100.1.4  | 5     |
| 1CCD    | a.101.1.1   | 77     | 3.11        | 5.32          | 7.62          | 0.94292041 | a.24.13.1  | 1     |
| 1utg_   | a.101.1.1   | 70     | 2.27        | 4.28          | 6.18          | 0.90859478 | a.101.1.1  | 5     |
| 5eau_   | a.102.4.1   | 200    | 9.85        | 10.81         | 12.2          | 0.78142281 | a.102.4.1  | 5     |
| 1ntca   | a.105.1.1   | 91     | 3.99        | 11.57         | 12.52         | 0.96153607 | a.4.9.1    | 1     |
| d1etxa_ | a.105.1.1   | 89     | 3.54        | 15.99         | 18.56         | 0.8516648  | a.24.3.2   | 1     |
| 1dd3a   | a.108.1.1   | 57     | 2.63        | 3.72          | 6.75          | 0.71712582 | a.108.1.1  | 5     |
| 1iiea   | a.109.1.1   | 75     | 4.25        | 10.24         | 14.38         | 0.56643423 | a.46.2.1   | 1     |
| 1hb6a   | a.11.1.1    | 86     | 4.37        | 3.88          | 5.15          | 0.94506086 | a.11.1.1   | 5     |
| 1hbka   | a.11.1.1    | 89     | 4.62        | 5.2           | 8.12          | 0.86514221 | a.24.13.1  | 1     |
| 1gg3a   | a.11.2.1    | 106    | 5.17        | 6.69          | 12.7          | 0.61999128 | a.121.1.1  | 1     |
| 1h4ra   | a.11.2.1    | 111    | 6.67        | 7.05          | 10.16         | 0.51403397 | a.142.1.1  | 1     |
| 1KU3A   | a.112.1.1   | 73     | 2.07        | 7.21          | 8             | 0.90077846 | a.112.1.1  | 4     |
| 1pbwa   | a.116.1.1   | 184    | 11.06       | 11.57         | 15.82         | 0.50117126 | a.116.1.1  | 4     |
| d1f7ca_ | a.116.1.1   | 191    | 11.6        | 14.18         | 17.81         | 0.68828245 | a.116.1.1  | 4     |
| 1kx8A   | a.118.1.12  | 100    | 2.49        | 5.18          | 6.19          | 0.87112816 | a.74.1.2   | 1     |
| 1K19A   | a.118.1.12  | 112    | 3.57        | 5.74          | 8.12          | 0.79282955 | a.1.1.2    | 1     |
| 1ocre   | a.118.11.1  | 109    | 4.94        | 3.96          | 4.93          | 0.99366934 | a.118.11.1 | 5     |
| 1kpsb   | a.118.12.1  | 156    | 9           | 7.7           | 10.4          | 0.94834165 | a.118.12.1 | 5     |
| d1k8kg_ | a.118.13.1  | 143    | 8.12        | 18.42         | 20.17         | 0.9258585  | a.118.13.1 | 4     |
| 1qc7a   | a.118.14.1  | 101    | 3.06        | 5.48          | 8.24          | 0.98591533 | a.118.14.1 | 5     |
| 1l5ja   | a.118.15.1  | 160    | 9.14        | 9             | 12.59         | 0.85032797 | a.118.15.1 | 5     |
| 1klxa   | a.118.18.1  | 133    | 4.85        | 7.54          | 11.37         | 0.96888648 | a.118.18.1 | 5     |
| 1BC9    | a.118.3.1   | 200    | 12.25       | 10.62         | 10.85         | 0.65233462 | a.118.3.1  | 4     |
| 1pbv_   | a.118.3.1   | 195    | 11.64       | 10.41         | 15.73         | 0.66294739 | a.118.3.1  | 5     |
| 1iyga   | a.118.8.1   | 133    | 4.71        | 5.21          | 6.5           | 0.9997454  | a.118.8.1  | 5     |

|         |           |     |       |       |       |            |            |   |
|---------|-----------|-----|-------|-------|-------|------------|------------|---|
| 1hxiA   | a.118.8.1 | 121 | 5.98  | 14.13 | 17.38 | 0.90098008 | a.118.8.1  | 4 |
| 1eyha   | a.118.9.1 | 144 | 7.67  | 7.56  | 10.6  | 0.98969278 | a.118.9.1  | 5 |
| 1kdx    | a.12.1.1  | 81  | 3.17  | 3.91  | 5.02  | 0.95429733 | a.12.1.1   | 5 |
| d2tct_2 | a.121.1.1 | 141 | 8.76  | 14.55 | 18.78 | 0.7483137  | a.26.1.1   | 1 |
| 1jt6a   | a.121.1.1 | 115 | 8.18  | 6.97  | 8.29  | 0.73294619 | a.24.3.2   | 1 |
| 1kxpd   | a.126.1.1 | 69  | 2.13  | 3.28  | 5.88  | 0.86357023 | a.126.1.1  | 5 |
| 1kxpd   | a.126.1.1 | 190 | 10.97 | 11.62 | 13.95 | 0.95592817 | a.126.1.1  | 5 |
| 1lre_   | a.13.1.1  | 81  | 4.91  | 3.97  | 5.63  | 0.95850797 | a.13.1.1   | 5 |
| 1ecma   | a.130.1.1 | 91  | 3.98  | 6.04  | 7.09  | 0.97641716 | a.130.1.1  | 5 |
| 1pprm   | a.131.1.1 | 156 | 9.54  | 11.02 | 15.03 | 0.54114289 | a.131.1.1  | 5 |
| d1j77a_ | a.132.1.2 | 200 | 13.13 | 12.88 | 15.02 | 0.79697643 | a.132.1.2  | 4 |
| 1FE5A   | a.133.1.2 | 118 | 9.27  | 8.83  | 10.38 | 0.5155915  | a.133.1.2  | 4 |
| 1DPYA   | a.133.1.2 | 118 | 8.8   | 11.49 | 14.85 | 0.43816265 | a.133.1.2  | 4 |
| 1BEO    | a.134.1.1 | 98  | 7.15  | 6.25  | 9.9   | 0.71198748 | a.134.1.1  | 4 |
| 1lria   | a.134.1.1 | 98  | 7.88  | 6.27  | 10.5  | 0.78439199 | a.24.17.1  | 1 |
| 1g8qa   | a.135.1.1 | 90  | 5.8   | 6.55  | 9.09  | 0.79939049 | a.23.4.1   | 1 |
| 1dvoa   | a.136.1.1 | 152 | 10.88 | 15.59 | 18.02 | 0.85659227 | a.52.1.2   | 1 |
| 1g72b   | a.137.2.1 | 57  | 5.25  | 11.67 | 14.1  | 0.42256774 | a.159.2.1  | 1 |
| 1tbge   | a.137.3.1 | 68  | 4.29  | 15.1  | 18.39 | 0.54273259 | a.46.2.1   | 1 |
| 1gg2g   | a.137.3.1 | 54  | 3.37  | 14.81 | 18.48 | 0.59721466 | d.47.1.1   | 0 |
| 1hfes   | a.137.4.1 | 88  | 6.69  | 14.01 | 16.77 | 0.69962679 | d.58.17.1  | 0 |
| d1ef1c_ | a.137.5.1 | 90  | 6.66  | 12.59 | 15.37 | 0.528333   | a.71.2.1   | 1 |
| d2prgc_ | a.137.6.1 | 76  | 6.19  | 25.04 | 30.63 | 0.5124204  | a.4.8.1    | 1 |
| 1e79i   | a.137.8.1 | 47  | 2.07  | 8.67  | 10    | 0.25448629 | d.45.1.1   | 0 |
| 1L3OA   | a.138.1.1 | 68  | 5.26  | 5.54  | 5.83  | 0.4679941  | a.52.1.1   | 1 |
| 1hh5a   | a.138.1.1 | 68  | 6.68  | 5.93  | 6.45  | 0.28341545 | d.58.17.1  | 0 |
| 1dava   | a.139.1.1 | 71  | 4.49  | 7.9   | 10.31 | 0.49467813 | a.85.1.1   | 1 |
| 1qqvA   | a.14.1.1  | 67  | 3.27  | 6.37  | 11.11 | 0.65379492 | a.164.1.1  | 1 |
| 1vii_   | a.14.1.1  | 36  | 0.97  | 2.28  | 2.54  | 0.4195326  | a.14.1.1   | 5 |
| 1jeia   | a.140.1.1 | 53  | 3.4   | 5.16  | 8.07  | 0.54302496 | a.140.1.1  | 5 |
| 1h9eA   | a.140.1.1 | 56  | 3.11  | 5.06  | 8.16  | 0.57607309 | a.140.4.1  | 2 |
| 1JJRA   | a.140.2.1 | 151 | 10.44 | 13.34 | 15.53 | 0.18544543 | a.118.13.1 | 1 |
| 1h1jS   | a.140.2.1 | 51  | 3.19  | 8.21  | 11.65 | 0.4559823  | a.140.1.1  | 2 |
| d1a62_1 | a.140.3.1 | 47  | 1.08  | 1.33  | 2.86  | 0.6860198  | a.140.4.1  | 2 |

|         |           |     |       |       |       |            |           |   |
|---------|-----------|-----|-------|-------|-------|------------|-----------|---|
| 1e7la   | a.140.4.1 | 54  | 2.11  | 2.44  | 4.43  | 0.80574968 | a.140.4.1 | 5 |
| 1ijya   | a.141.1.1 | 122 | 8.41  | 7.84  | 12.32 | 0.33668163 | a.133.1.3 | 1 |
| 1h99a   | a.142.1.1 | 115 | 4.05  | 4.15  | 7.21  | 0.99531199 | a.142.1.1 | 5 |
| d1h99a2 | a.142.1.1 | 107 | 4.69  | 5.14  | 5.5   | 0.9973688  | a.142.1.1 | 4 |
| 1iw7e   | a.143.1.1 | 95  | 7.65  | 7.42  | 11.16 | 0.47148217 | a.118.9.2 | 1 |
| 1ifwa   | a.144.1.1 | 92  | 3.76  | 6.56  | 7.9   | 0.96767589 | a.144.1.1 | 5 |
| 1i2ta   | a.144.1.1 | 61  | 1.8   | 2.5   | 3.39  | 0.94961566 | a.144.1.1 | 5 |
| 1gyza   | a.144.2.1 | 60  | 1.82  | 2.49  | 3.32  | 0.96372375 | a.144.2.1 | 5 |
| 1g8ea   | a.145.1.1 | 98  | 6.65  | 8.5   | 10.25 | 0.81423113 | a.145.1.1 | 5 |
| d1k1fa_ | a.147.1.1 | 67  | 3.76  | 11.46 | 14.36 | 0.78909978 | a.74.1.1  | 1 |
| 1k8ke   | a.148.1.1 | 174 | 11.27 | 11.78 | 14.82 | 0.78559112 | f.13.1.1  | 0 |
| 1o0wa   | a.149.1.1 | 169 | 9.28  | 9.62  | 12.61 | 0.9853512  | a.149.1.1 | 4 |
| 1tbaa   | a.15.1.1  | 67  | 5.37  | 6.37  | 9.7   | 0.38954488 | a.60.3.1  | 1 |
| d1gpja1 | a.151.1.1 | 102 | 2.78  | 17.1  | 19.78 | 0.970604   | a.23.1.1  | 1 |
| 1knca   | a.152.1.1 | 174 | 9.55  | 8.29  | 9.53  | 0.79587716 | a.152.1.1 | 5 |
| 1JJA    | a.153.1.1 | 50  | 1.49  | 5.11  | 6.89  | 0.7149052  | a.4.10.1  | 1 |
| 1hns_   | a.155.1.1 | 47  | 2.16  | 4.14  | 6.17  | 0.45776417 | g.7.1.3   | 0 |
| 1l1za   | a.156.1.2 | 88  | 3.79  | 4.92  | 10.48 | 0.59692462 | a.156.1.2 | 4 |
| 1mu5a   | a.156.1.3 | 78  | 3.03  | 3.51  | 6.08  | 0.98487821 | a.156.1.3 | 5 |
| 1fs1b   | a.157.1.1 | 55  | 1.94  | 3.83  | 5.69  | 0.8367471  | a.46.2.1  | 1 |
| 1nexb   | a.158.1.1 | 100 | 5.56  | 5.78  | 7.56  | 0.76599951 | a.158.1.1 | 5 |
| 1fs1a   | a.158.1.1 | 41  | 1.68  | 2.65  | 3.76  | 0.59244214 | a.158.1.1 | 5 |
| d1a6q_1 | a.159.1.1 | 72  | 2.85  | 17.23 | 18.26 | 0.92671867 | a.112.1.1 | 1 |
| 1H40A   | a.159.2.1 | 71  | 2.67  | 3.96  | 5.5   | 0.94031187 | a.159.2.1 | 4 |
| 1r1bA   | a.16.1.3  | 56  | 2.04  | 3.53  | 4.75  | 0.62906323 | a.16.1.3  | 4 |
| 1fyja   | a.16.1.3  | 57  | 1.61  | 2     | 5.53  | 0.93828117 | a.16.1.3  | 5 |
| d1f5aa3 | a.160.1.1 | 150 | 10.58 | 9.57  | 11.81 | 0.38302315 | a.74.1.3  | 1 |
| d1m1eb_ | a.161.1.1 | 70  | 4.12  | 16.18 | 18.72 | 0.71366486 | a.4.1.1   | 1 |
| d1m6na1 | a.162.1.1 | 122 | 5.42  | 5.39  | 10.76 | 0.9823432  | a.162.1.1 | 4 |
| 1j0ta   | a.163.1.1 | 78  | 3.97  | 4.07  | 4.97  | 0.98903091 | a.163.1.1 | 5 |
| 1IYRA   | a.164.1.1 | 111 | 8.72  | 10.25 | 13.38 | 0.30088368 | f.14.1.1  | 0 |
| 1koya   | a.164.1.1 | 62  | 3.2   | 5.91  | 9.62  | 0.66560505 | a.144.1.1 | 1 |
| 1K5OA   | a.165.1.1 | 86  | 5.85  | 9.5   | 9.94  | 0.82461504 | a.52.1.1  | 1 |
| 1p0ya   | a.166.1.1 | 176 | 11.73 | 14.14 | 17.98 | 0.41351338 | c.54.1.1  | 0 |

|         |           |     |       |       |       |            |           |   |
|---------|-----------|-----|-------|-------|-------|------------|-----------|---|
| 1gzsb   | a.168.1.1 | 165 | 10.41 | 9.52  | 15.59 | 0.49082622 | c.23.4.1  | 0 |
| 2hp8_   | a.17.1.1  | 68  | 3.09  | 4.7   | 5.7   | 0.81344488 | a.17.1.1  | 5 |
| d1iyjb2 | a.171.1.1 | 137 | 8.38  | 27.38 | 29.54 | 0.63571748 | a.4.12.1  | 1 |
| 1k6ka   | a.174.1.1 | 142 | 7.09  | 6.71  | 10.7  | 0.82437456 | a.174.1.1 | 5 |
| 1m98a   | a.175.1.1 | 174 | 10.39 | 13.72 | 17.29 | 0.13726901 | c.37.1.19 | 0 |
| d1k87a1 | a.176.1.1 | 175 | 9.69  | 24.66 | 27.78 | 0.5340396  | c.108.1.1 | 0 |
| 2end_   | a.18.1.1  | 137 | 10.14 | 9.16  | 13.39 | 0.38913977 | d.43.1.1  | 0 |
| 1enk_   | a.18.1.1  | 137 | 10.06 | 9.81  | 12.58 | 0.71807384 | a.18.1.1  | 4 |
| 2lisa   | a.19.1.1  | 131 | 8.46  | 9.81  | 12.72 | 0.99289689 | a.19.1.1  | 5 |
| 1aqt_   | a.2.10.1  | 50  | 1.81  | 1.72  | 3.02  | 0.88507751 | a.2.10.1  | 5 |
| 1e79h   | a.2.10.1  | 45  | 2.86  | 4.84  | 5.9   | 0.43444178 | a.2.10.1  | 5 |
| d1qnna1 | a.2.11.1  | 84  | 4.64  | 6.35  | 8.78  | 0.74597538 | a.2.11.1  | 4 |
| 1coja   | a.2.11.1  | 89  | 5.21  | 6.6   | 9.35  | 0.92819748 | a.23.1.1  | 1 |
| 1jj2u   | a.2.2.1   | 65  | 1.23  | 2.33  | 3.39  | 0.87589657 | a.2.2.1   | 5 |
| 1hdj_   | a.2.3.1   | 77  | 2.42  | 3.16  | 3.99  | 0.96763473 | a.2.3.1   | 5 |
| 1BQZ    | a.2.3.1   | 77  | 3.33  | 4.89  | 5.76  | 0.95965157 | a.2.3.1   | 4 |
| 1du2a   | a.2.4.1   | 76  | 5.12  | 10.59 | 13.52 | 0.47175478 | c.47.1.1  | 0 |
| d1fxka_ | a.2.5.1   | 107 | 5.56  | 3.62  | 4.47  | 0.97263516 | a.2.5.1   | 4 |
| 1fxkc   | a.2.5.1   | 133 | 5.21  | 5.48  | 6.68  | 0.99607571 | a.2.5.1   | 5 |
| 1cxzb   | a.2.6.1   | 86  | 3.41  | 6.81  | 12.59 | 0.72616741 | a.44.1.1  | 1 |
| 1ivsa   | a.2.7.3   | 66  | 3.38  | 5.72  | 6.98  | 0.85809495 | a.2.7.3   | 5 |
| 1lrza   | a.2.7.4   | 65  | 3.38  | 7.91  | 8.46  | 0.56011242 | a.46.2.1  | 1 |
| 1k4ta   | a.2.8.1   | 72  | 4.68  | 5.66  | 8.11  | 0.89548689 | a.2.8.1   | 5 |
| 1e52a   | a.2.9.1   | 56  | 1.28  | 6.76  | 7.84  | 0.68935072 | a.2.9.1   | 5 |
| d1l6ja1 | a.20.1.2  | 77  | 3.83  | 22.92 | 24.39 | 0.6479286  | a.20.1.1  | 3 |
| d1slm_1 | a.20.1.2  | 65  | 3.62  | 39.45 | 40.97 | 0.50676784 | a.28.1.1  | 1 |
| 1HME    | a.21.1.1  | 77  | 3.42  | 5.88  | 8.49  | 0.89283254 | a.21.1.1  | 4 |
| 1qrva   | a.21.1.1  | 73  | 3.32  | 5.83  | 8.35  | 0.90690269 | a.159.1.1 | 1 |
| 1a7w_   | a.22.1.2  | 68  | 1.97  | 6.16  | 9.73  | 0.79823074 | a.39.1.1  | 1 |
| 1hta_   | a.22.1.2  | 68  | 2.54  | 5.65  | 9.21  | 0.89361483 | a.179.1.1 | 1 |
| 1fpoa   | a.23.1.1  | 95  | 1.98  | 2.97  | 5.4   | 0.99667196 | a.23.1.1  | 5 |
| 1eexg   | a.23.2.1  | 137 | 8.31  | 10.41 | 12.39 | 0.70252754 | a.23.2.1  | 5 |
| 1om2a   | a.23.4.1  | 95  | 3.37  | 7.9   | 9.04  | 0.95839323 | a.23.4.1  | 5 |
| 1jw2a   | a.23.5.1  | 72  | 2.93  | 5.75  | 8.71  | 0.67932888 | a.23.5.1  | 5 |

|         |           |     |       |       |       |            |           |   |
|---------|-----------|-----|-------|-------|-------|------------|-----------|---|
| 1LE2    | a.24.1.1  | 144 | 5.86  | 7.48  | 10.83 | 0.93600205 | a.2.5.1   | 1 |
| 1LE4    | a.24.1.1  | 144 | 7.81  | 15.19 | 15.19 | 0.95161071 | a.24.1.1  | 4 |
| 1aOb_   | a.24.10.1 | 117 | 4.82  | 3.6   | 13.41 | 0.99948628 | a.24.10.1 | 4 |
| 2aOb_   | a.24.10.1 | 118 | 4.66  | 3.83  | 13.19 | 0.99742645 | a.24.10.1 | 5 |
| 1he9A   | a.24.11.1 | 134 | 8.76  | 7.22  | 10.51 | 0.75266328 | f.14.1.1  | 0 |
| 1G5ZA   | a.24.12.1 | 164 | 10.01 | 11    | 13.97 | 0.7800039  | a.24.1.1  | 2 |
| 1j8mf   | a.24.13.1 | 84  | 2.53  | 2.67  | 3.18  | 0.99326731 | a.24.13.1 | 5 |
| 1fts_   | a.24.13.1 | 84  | 2.25  | 4.02  | 5.05  | 0.94374772 | a.24.13.1 | 4 |
| 1k04a   | a.24.14.1 | 142 | 9.73  | 12.4  | 14.14 | 0.97537323 | f.13.1.1  | 0 |
| 1K40A   | a.24.14.1 | 126 | 7.76  | 3.93  | 5.16  | 0.94854501 | f.36.1.1  | 0 |
| 1jr8a   | a.24.15.1 | 105 | 5.19  | 5.88  | 10.09 | 0.82319237 | a.118.8.1 | 1 |
| 1knya   | a.24.16.1 | 128 | 8.42  | 7.5   | 9.82  | 0.72550804 | a.24.16.1 | 5 |
| d1joga_ | a.24.16.2 | 135 | 8.02  | 3.88  | 5.44  | 0.82690645 | a.19.1.1  | 1 |
| 1nlxa   | a.24.17.1 | 104 | 4.97  | 4.97  | 8.02  | 0.9868818  | a.24.17.1 | 5 |
| 2ASR    | a.24.2.1  | 142 | 9.27  | 5.91  | 5.91  | 0.90408208 | a.24.3.2  | 2 |
| 1WAS    | a.24.2.1  | 146 | 7.86  | 6.9   | 9.64  | 0.98911356 | a.24.12.1 | 2 |
| 256ba   | a.24.3.1  | 106 | 2.61  | 3.12  | 4.64  | 0.99098845 | a.24.3.2  | 3 |
| 1M6TA   | a.24.3.1  | 106 | 2.96  | 2.63  | 4.68  | 0.99115395 | a.24.3.1  | 4 |
| 1HRB    | a.24.4.1  | 113 | 4.7   | 5.6   | 10.49 | 0.97632869 | a.24.4.1  | 4 |
| 2mhr_   | a.24.4.1  | 118 | 4.03  | 6.73  | 8.67  | 0.9968477  | a.24.4.1  | 5 |
| 1dova   | a.24.9.1  | 181 | 7.89  | 8.48  | 22.46 | 0.9993633  | a.24.9.1  | 5 |
| 1krqA   | a.25.1.1  | 165 | 6.06  | 4.5   | 6.39  | 0.99846872 | a.25.1.1  | 4 |
| 1rce_   | a.25.1.1  | 171 | 9.01  | 7.75  | 9.16  | 0.97830265 | a.25.1.1  | 4 |
| 1jli_   | a.26.1.2  | 112 | 8     | 7.83  | 10.86 | 0.60611922 | a.118.8.1 | 1 |
| 1ik0a   | a.26.1.2  | 113 | 8.33  | 8.17  | 8.95  | 0.5257204  | a.118.8.1 | 1 |
| 1f7ua   | a.27.1.1  | 124 | 5.77  | 3.7   | 10.38 | 0.98319162 | a.27.1.1  | 5 |
| 1li5a   | a.27.1.1  | 87  | 2.67  | 4.06  | 9.14  | 0.9733483  | a.27.1.1  | 5 |
| 1T8KA   | a.28.1.1  | 77  | 2.38  | 3.74  | 5.2   | 0.99468691 | a.28.1.1  | 4 |
| 1hy8A   | a.28.1.1  | 76  | 2.27  | 2.82  | 3.57  | 0.99387814 | a.28.1.1  | 4 |
| 1gxgA   | a.28.2.1  | 85  | 4.79  | 5.83  | 10.42 | 0.81887617 | a.28.2.1  | 4 |
| 1IMQ    | a.28.2.1  | 86  | 4.46  | 4.92  | 5.56  | 0.83652045 | a.28.2.1  | 4 |
| 1a43_   | a.28.3.1  | 72  | 3.08  | 2.86  | 4.36  | 0.97692859 | a.28.3.1  | 4 |
| 1AUM    | a.28.3.1  | 70  | 3.49  | 3.49  | 5.16  | 0.8719037  | a.28.3.1  | 4 |
| 1n72A   | a.29.2.1  | 115 | 6.09  | 6.95  | 8.94  | 0.78074761 | a.74.1.1  | 1 |

|         |          |     |       |      |       |            |           |   |
|---------|----------|-----|-------|------|-------|------------|-----------|---|
| 1f68a   | a.29.2.1 | 103 | 4.39  | 4.14 | 6.6   | 0.95523043 | a.29.2.1  | 5 |
| 1jqia   | a.29.3.1 | 153 | 7.57  | 8.11 | 12.71 | 0.99819914 | a.29.3.1  | 5 |
| 1ivha   | a.29.3.1 | 151 | 5.01  | 5.33 | 5.78  | 0.99577086 | a.29.3.1  | 4 |
| 1gm5a   | a.29.4.1 | 99  | 5.38  | 7.2  | 11.81 | 0.7388583  | a.7.2.1   | 1 |
| d1jm6a1 | a.29.5.1 | 167 | 10.07 | 9.59 | 12.08 | 0.98198421 | a.29.5.1  | 4 |
| 1gkza   | a.29.5.1 | 148 | 8.91  | 7.73 | 9.49  | 0.97203835 | a.29.5.1  | 5 |
| 1c75a   | a.3.1.1  | 71  | 3.74  | 3.85 | 6.76  | 0.65875318 | a.178.1.1 | 1 |
| 1ropA   | a.30.1.1 | 56  | 2.45  | 2.34 | 8.67  | 0.83605246 | a.8.1.1   | 1 |
| 1b6q_   | a.30.1.1 | 56  | 2.79  | 4.8  | 8.89  | 0.8335688  | g.2.2.1   | 0 |
| 1joya   | a.30.2.1 | 67  | 1.61  | 8.62 | 10.61 | 0.97619516 | a.7.7.1   | 1 |
| 1b3qa   | a.30.2.1 | 62  | 1.76  | 4.49 | 6.11  | 0.85166323 | a.30.2.1  | 5 |
| 1r2aa   | a.31.1.1 | 46  | 1.7   | 7.74 | 8.66  | 0.67151798 | a.8.1.1   | 1 |
| 1ytfd   | a.32.1.1 | 50  | 1.3   | 3.27 | 5.96  | 0.70462739 | a.32.1.1  | 5 |
| 1ytfb   | a.32.1.1 | 46  | 1.8   | 2.8  | 4.71  | 0.61631909 | a.4.1.3   | 1 |
| 1ecia   | a.33.1.1 | 37  | 1.22  | 3.61 | 4.4   | 0.32406557 | a.4.10.1  | 1 |
| 1PRU    | a.35.1.5 | 56  | 1.65  | 5.31 | 5.83  | 0.6823468  | a.35.1.5  | 4 |
| d1hq1a_ | a.36.1.1 | 104 | 3.38  | 7.29 | 8.81  | 0.94761234 | a.36.1.1  | 4 |
| d1qb2a_ | a.36.1.1 | 107 | 3.95  | 7.29 | 9.49  | 0.98412248 | a.36.1.1  | 4 |
| 1k1va   | a.37.1.1 | 41  | 0.92  | 2.51 | 3.74  | 0.6019454  | a.37.1.1  | 5 |
| 1a0aa   | a.38.1.1 | 63  | 3.35  | 8.62 | 11.52 | 0.78871816 | a.30.2.1  | 1 |
| 1an4a   | a.38.1.1 | 65  | 3.53  | 8.12 | 12.26 | 0.81694382 | a.2.2.1   | 1 |
| 1F71A   | a.39.1.5 | 67  | 1.42  | 2.44 | 4.16  | 0.91474083 | a.39.1.5  | 4 |
| 1c3za   | a.39.2.1 | 108 | 5.33  | 7.8  | 10.95 | 0.53713647 | a.28.1.3  | 1 |
| d1cpo_1 | a.39.3.1 | 120 | 8.98  | 0    | 0     | 0.50306379 | a.39.3.1  | 4 |
| 1iioa   | a.39.4.1 | 84  | 5.36  | 4.64 | 4.64  | 0.9612805  | a.39.4.1  | 5 |
| 1gdta   | a.4.1.2  | 43  | 0.94  | 3.44 | 4.64  | 0.53914497 | a.4.10.1  | 2 |
| 1mbj_   | a.4.1.3  | 52  | 1.64  | 3.69 | 5.14  | 0.77606319 | a.4.1.3   | 4 |
| 1k6ya   | a.4.10.1 | 46  | 1.32  | 3.03 | 4.04  | 0.60097049 | a.4.10.1  | 5 |
| 1ef4A   | a.4.11.1 | 55  | 1.47  | 3.29 | 3.92  | 0.86175043 | a.4.11.1  | 4 |
| 1jhga   | a.4.12.1 | 101 | 3.51  | 6.3  | 7.24  | 0.8864778  | a.4.12.1  | 5 |
| 1WRPR   | a.4.12.1 | 107 | 3.82  | 7.46 | 7.76  | 0.9479786  | a.4.12.1  | 4 |
| 1sfe_   | a.4.2.1  | 84  | 5.62  | 4.76 | 8.95  | 0.78325892 | a.4.2.1   | 5 |
| 1mgta   | a.4.2.1  | 81  | 4.14  | 3.75 | 4.37  | 0.97575461 | a.4.2.1   | 5 |
| 1ig6a   | a.4.3.1  | 107 | 7.36  | 6.99 | 7.9   | 0.84002389 | a.4.3.1   | 4 |

|         |          |     |      |       |       |            |          |   |
|---------|----------|-----|------|-------|-------|------------|----------|---|
| 1kkxa   | a.4.3.1  | 102 | 5.75 | 5.24  | 8.21  | 0.979682   | a.4.3.1  | 5 |
| 2bby_   | a.4.5.15 | 69  | 3.41 | 4     | 5.31  | 0.88012984 | a.4.5.15 | 5 |
| 1QQIA   | a.4.6.1  | 104 | 4.67 | 3.84  | 4.27  | 0.99172266 | a.4.6.1  | 4 |
| 1gxqa   | a.4.6.1  | 105 | 4.95 | 4.29  | 4.29  | 0.99464166 | a.4.6.1  | 5 |
| 1FOW    | a.4.7.1  | 76  | 3.55 | 3.34  | 4.55  | 0.93887071 | a.4.7.1  | 4 |
| 1fjgr   | a.4.8.1  | 73  | 5.5  | 5.74  | 8.38  | 0.68374619 | a.4.8.1  | 5 |
| 1e3ha   | a.4.9.1  | 83  | 2.34 | 2.95  | 4.94  | 0.99657517 | a.4.9.1  | 5 |
| 1bkra   | a.40.1.1 | 108 | 6.9  | 5.51  | 9.48  | 0.82865702 | a.40.1.1 | 5 |
| 1lnsa   | a.40.2.1 | 145 | 9.8  | 9.98  | 11.64 | 0.5978624  | a.40.2.1 | 5 |
| 1a26_   | a.41.1.1 | 135 | 9.4  | 8.15  | 12.66 | 0.70718048 | f.36.1.1 | 0 |
| d1gs0a1 | a.41.1.1 | 134 | 8.54 | 9.83  | 13.35 | 0.64518332 | d.56.1.2 | 0 |
| 1ycqa   | a.42.1.1 | 88  | 4.9  | 4.91  | 9.57  | 0.36908784 | a.13.1.1 | 1 |
| 1irqa   | a.43.1.2 | 48  | 1.67 | 5.79  | 9.28  | 0.58420055 | b.35.2.1 | 0 |
| 2cpga   | a.43.1.2 | 43  | 2.14 | 3.56  | 5.07  | 0.42931976 | a.5.1.1  | 1 |
| 1bed_   | a.44.1.1 | 64  | 2.02 | 3.45  | 4.94  | 0.8909024  | a.65.1.1 | 1 |
| 1fvka   | a.44.1.1 | 64  | 2.1  | 2.85  | 3.48  | 0.94790143 | a.44.1.1 | 4 |
| 1a0fa   | a.45.1.1 | 121 | 5.16 | 4.6   | 5.22  | 0.98615848 | a.45.1.1 | 5 |
| 1bmta   | a.46.1.1 | 90  | 2.76 | 3.71  | 6.32  | 0.99704521 | a.46.1.1 | 5 |
| 1khda   | a.46.2.1 | 69  | 1.57 | 5.12  | 5.78  | 0.88155447 | a.48.3.1 | 1 |
| 1brwa   | a.46.2.1 | 70  | 1.94 | 4.42  | 6.73  | 0.94849615 | a.46.2.1 | 5 |
| d1bg1a1 | a.47.1.1 | 186 | 8.97 | 36.61 | 38.31 | 0.99958213 | a.47.1.1 | 4 |
| 1BR0A   | a.47.2.1 | 120 | 4.95 | 4.08  | 5.78  | 0.99591235 | a.47.2.1 | 4 |
| 2cbla   | a.48.1.1 | 131 | 7.84 | 6.33  | 9.5   | 0.72495247 | a.48.1.1 | 5 |
| 1de4c   | a.48.2.1 | 148 | 8.71 | 7.69  | 10.5  | 0.91057434 | a.48.2.1 | 5 |
| 1eo0a   | a.48.3.1 | 77  | 4.47 | 5.14  | 8     | 0.74418681 | a.46.2.1 | 1 |
| 1f6va   | a.49.1.1 | 91  | 3.62 | 9.37  | 11.08 | 0.60653397 | a.64.1.2 | 1 |
| 1ixsa   | a.5.1.1  | 50  | 1.04 | 1.1   | 1.73  | 0.88946694 | a.5.1.1  | 5 |
| 1cuk_   | a.5.1.1  | 48  | 1.23 | 1.85  | 3.03  | 0.84254216 | a.5.1.1  | 5 |
| 1DVOA   | a.5.2.1  | 47  | 0.98 | 5.42  | 6.1   | 0.78640719 | a.5.7.1  | 2 |
| 1f4ia   | a.5.2.1  | 45  | 0.98 | 2.17  | 3.26  | 0.66753851 | a.5.2.1  | 5 |
| 1aua_   | a.5.3.1  | 93  | 5.16 | 6.45  | 9.72  | 0.95152428 | a.5.3.1  | 5 |
| 1enwa   | a.5.4.1  | 114 | 4.95 | 11.13 | 14.5  | 0.76219924 | a.1.1.2  | 1 |
| 1EIJA   | a.5.6.1  | 80  | 2.6  | 6.42  | 6.93  | 0.84146869 | a.5.6.1  | 4 |
| 1C5A    | a.50.1.1 | 73  | 3.29 | 9.36  | 13.79 | 0.88551685 | a.50.1.1 | 4 |

|         |           |     |      |       |       |            |           |   |
|---------|-----------|-----|------|-------|-------|------------|-----------|---|
| 1kjs_   | a.50.1.1  | 74  | 3.58 | 3.9   | 4.25  | 0.91184651 | a.50.1.1  | 4 |
| 1ocrh   | a.51.1.1  | 79  | 4.26 | 4.89  | 6.04  | 0.91865986 | a.51.1.1  | 5 |
| 1HYP    | a.52.1.1  | 80  | 5.58 | 6.78  | 8.35  | 0.92314585 | a.52.1.1  | 4 |
| 1l6ha   | a.52.1.1  | 69  | 3.61 | 3.57  | 4.55  | 0.96718956 | a.52.1.1  | 5 |
| 1adt_   | a.54.1.1  | 90  | 5.46 | 7.77  | 12.36 | 0.9028147  | a.112.1.1 | 1 |
| 1dp3a   | a.55.1.2  | 55  | 2.27 | 6.43  | 7.77  | 0.59761275 | a.4.1.7   | 1 |
| 1fo4a   | a.56.1.1  | 73  | 4    | 4.35  | 6.59  | 0.82279195 | a.46.2.1  | 1 |
| 1n62a   | a.56.1.1  | 82  | 4.82 | 4.8   | 6.85  | 0.66802544 | a.56.1.1  | 5 |
| 1dj8a   | a.57.1.1  | 79  | 6.28 | 4.79  | 7.36  | 0.45401755 | a.4.5.14  | 1 |
| 1af7_   | a.58.1.1  | 81  | 2.8  | 3.38  | 6.06  | 0.98996194 | a.58.1.1  | 5 |
| 1g1eb   | a.59.1.1  | 89  | 4.71 | 5.76  | 6.31  | 0.95446612 | a.59.1.1  | 5 |
| 1jbga   | a.6.1.3   | 106 | 4.92 | 9.01  | 12.92 | 0.58961074 | a.6.1.3   | 5 |
| 1dxsa   | a.60.1.2  | 57  | 1.4  | 1.26  | 1.59  | 0.92878289 | a.60.1.2  | 5 |
| 1f0mA   | a.60.1.2  | 71  | 3.06 | 3.09  | 6.75  | 0.97624695 | a.60.1.2  | 4 |
| 1zyrna  | a.60.10.1 | 123 | 3.72 | 3.94  | 4.98  | 0.9994429  | a.60.10.1 | 5 |
| 1jyga   | a.60.11.1 | 69  | 2.8  | 3.24  | 9.41  | 0.96350433 | a.60.11.1 | 5 |
| 1jmsa   | a.60.12.1 | 60  | 2.24 | 3.11  | 3.86  | 0.93638687 | a.60.12.1 | 5 |
| 1jn3a   | a.60.12.1 | 58  | 1.89 | 1.65  | 3.7   | 0.94219457 | a.60.12.1 | 5 |
| d1m6ya1 | a.60.13.1 | 101 | 5.79 | 6.15  | 10.48 | 0.49299608 | a.1.1.2   | 1 |
| 1KFTA   | a.60.2.3  | 78  | 2.99 | 7.24  | 8.76  | 0.92937393 | a.60.1.2  | 2 |
| 1doqa   | a.60.3.1  | 69  | 1.95 | 2.57  | 3.74  | 0.98673395 | a.60.3.1  | 5 |
| 1coo_   | a.60.3.1  | 81  | 4.65 | 3.77  | 5.72  | 0.9739397  | a.60.3.1  | 4 |
| 1B22A   | a.60.4.1  | 114 | 6.02 | 10.78 | 12.07 | 0.68574696 | a.60.1.2  | 2 |
| 2EZZA   | a.60.5.1  | 89  | 3.11 | 4.17  | 10.29 | 0.95777902 | a.74.1.1  | 1 |
| 1BNO    | a.60.6.1  | 87  | 3.87 | 5.71  | 8.89  | 0.98357974 | a.60.6.1  | 4 |
| 1xo1a   | a.60.7.1  | 105 | 7.46 | 9.71  | 10.25 | 0.38028328 | a.7.3.1   | 1 |
| 1a77_   | a.60.7.1  | 108 | 6.84 | 13.91 | 15.64 | 0.40881725 | a.36.1.1  | 1 |
| 1d8ba   | a.60.8.1  | 81  | 5.23 | 5.11  | 6.64  | 0.67782477 | a.60.2.1  | 2 |
| 1f44a   | a.60.9.1  | 110 | 7.09 | 5.97  | 11.99 | 0.93461606 | a.60.9.1  | 5 |
| d1a0p_1 | a.60.9.1  | 98  | 2.04 | 16.25 | 17.05 | 0.98475372 | a.60.9.1  | 4 |
| 1bax_   | a.61.1.3  | 94  | 4.23 | 4.27  | 4.65  | 0.99019853 | a.61.1.3  | 5 |
| 1a6s_   | a.61.1.4  | 87  | 2.9  | 4.45  | 4.72  | 0.97827768 | a.61.1.4  | 5 |
| 1qgta   | a.62.1.1  | 142 | 9.3  | 11.13 | 13.87 | 0.51941735 | a.62.1.1  | 5 |
| 1eq1a   | a.63.1.1  | 166 | 8.23 | 8.69  | 13.61 | 0.8681215  | a.47.1.1  | 1 |



|         |          |     |       |       |       |            |            |   |
|---------|----------|-----|-------|-------|-------|------------|------------|---|
| 1AEP    | a.63.1.1 | 161 | 9.8   | 11.27 | 17.84 | 0.74601611 | a.7.4.1    | 1 |
| 1I9la   | a.64.1.1 | 74  | 3.2   | 3.22  | 4.39  | 0.95891134 | a.64.1.1   | 4 |
| 1nkl_   | a.64.1.1 | 78  | 2.58  | 3.42  | 4.82  | 0.9658272  | a.64.1.1   | 5 |
| 1e68a   | a.64.2.1 | 70  | 2.59  | 3.96  | 4.34  | 0.97056654 | a.64.2.1   | 5 |
| 1bo9a   | a.65.1.1 | 73  | 2.02  | 3.31  | 7.63  | 0.98802726 | a.65.1.1   | 5 |
| 1azsc   | a.66.1.1 | 116 | 7.32  | 6.06  | 8.91  | 0.80440375 | a.66.1.1   | 4 |
| 1cipa   | a.66.1.1 | 121 | 8.14  | 6.39  | 11.04 | 0.77215227 | a.66.1.1   | 5 |
| 1ej5a   | a.68.1.1 | 107 | 6.77  | 6.82  | 10.5  | 0.95568165 | a.68.1.1   | 5 |
| 1e79d   | a.69.1.1 | 118 | 7.36  | 7.82  | 9.09  | 0.94715523 | a.69.1.1   | 5 |
| 1e79a   | a.69.1.1 | 131 | 7.2   | 8.95  | 12.16 | 0.79718917 | a.77.1.3   | 1 |
| d1fkma1 | a.69.2.1 | 194 | 12.36 | 10.67 | 13.33 | 0.44740806 | c.37.1.12  | 0 |
| d1fkma2 | a.69.2.1 | 188 | 12.09 | 15.57 | 22.8  | 0.23704097 | f.13.1.1   | 0 |
| d1jvsa1 | a.69.3.1 | 99  | 3.89  | 6.13  | 7.02  | 0.99443434 | a.69.3.1   | 4 |
| 1AJ3    | a.7.1.1  | 110 | 2.95  | 10.59 | 13.05 | 0.99826959 | a.7.4.1    | 2 |
| 1e2aA   | a.7.2.1  | 102 | 2.82  | 3.26  | 3.96  | 0.99643009 | a.7.2.1    | 4 |
| 1chua   | a.7.3.1  | 111 | 6.29  | 7.99  | 12.67 | 0.81971721 | a.24.7.1   | 1 |
| 1kf6a   | a.7.3.1  | 134 | 8.99  | 9.33  | 9.5   | 0.49285704 | a.74.1.3   | 1 |
| 1FEWA   | a.7.4.1  | 184 | 10.69 | 15.65 | 16.89 | 0.98991693 | a.7.4.1    | 4 |
| 1h7cA   | a.7.5.1  | 108 | 3.55  | 16.52 | 17.47 | 0.99819332 | a.7.5.1    | 4 |
| 1fjgt   | a.7.6.1  | 99  | 3.49  | 4.9   | 7.55  | 0.99489342 | a.7.6.1    | 5 |
| 1M62A   | a.7.7.1  | 87  | 3.32  | 4     | 5.86  | 0.97317845 | a.7.3.1    | 2 |
| 1M7KA   | a.7.7.1  | 99  | 5.17  | 6.89  | 7.94  | 0.96202482 | a.7.7.1    | 4 |
| 1abv_   | a.70.1.1 | 105 | 3.38  | 3.24  | 3.64  | 0.99979364 | a.70.1.1   | 5 |
| 1g7da   | a.71.1.1 | 106 | 3.44  | 4.63  | 5.77  | 0.99683954 | a.71.1.1   | 5 |
| 1m2oa   | a.71.2.1 | 103 | 6.6   | 6.05  | 10.59 | 0.94936943 | a.71.2.1   | 4 |
| 1m2vb   | a.71.2.1 | 107 | 6.2   | 4.88  | 6.89  | 0.90599249 | a.24.17.1  | 1 |
| d1dvka_ | a.72.1.1 | 169 | 10.03 | 21.47 | 24.07 | 0.85370805 | a.27.1.1   | 1 |
| 1g03A   | a.73.1.1 | 134 | 6.85  | 7.32  | 9.67  | 0.73632953 | a.73.1.1   | 4 |
| 1GDZ    | a.73.1.1 | 151 | 10.43 | 11.38 | 14.07 | 0.32908247 | a.73.1.1   | 4 |
| 1AD6    | a.74.1.3 | 185 | 11.47 | 10.26 | 11.15 | 0.53716171 | a.74.1.3   | 4 |
| 1RSS    | a.75.1.1 | 151 | 5.02  | 18.65 | 23.31 | 0.54713166 | a.118.13.1 | 1 |
| 1hus_   | a.75.1.1 | 155 | 7.36  | 15.4  | 20.08 | 0.61262343 | a.133.1.3  | 1 |
| 1fx7a   | a.76.1.1 | 80  | 3.47  | 5.34  | 7.23  | 0.86323712 | a.76.1.1   | 5 |
| 1ngr_   | a.77.1.2 | 85  | 4.13  | 4.76  | 6.84  | 0.85908822 | a.77.1.2   | 5 |

|         |          |     |       |       |       |            |           |   |
|---------|----------|-----|-------|-------|-------|------------|-----------|---|
| 1dgna   | a.77.1.3 | 89  | 3.07  | 4.09  | 8.48  | 0.92392039 | a.77.1.3  | 5 |
| 1hw1a   | a.78.1.1 | 152 | 8.24  | 8.01  | 14    | 0.86534084 | a.29.3.2  | 1 |
| 1ey1a   | a.79.1.1 | 139 | 5.57  | 5.61  | 7.48  | 0.88359602 | a.79.1.1  | 4 |
| 1TFOB   | a.8.1.2  | 53  | 1.46  | 3.32  | 5.88  | 0.79499804 | a.60.1.2  | 1 |
| d1gvna_ | a.8.2.1  | 88  | 5.31  | 6.62  | 11.88 | 0.65050359 | a.27.1.1  | 1 |
| 1iqpa   | a.80.1.1 | 95  | 3.18  | 2.18  | 5.44  | 0.99437423 | a.80.1.1  | 5 |
| d1a5t_1 | a.80.1.1 | 123 | 4.83  | 11.22 | 14.65 | 0.95331752 | a.1.1.2   | 1 |
| 1JWEA   | a.81.1.1 | 114 | 5.09  | 8.04  | 11.65 | 0.78314209 | a.81.1.1  | 4 |
| 1qh4a   | a.83.1.1 | 101 | 7.67  | 7.94  | 12.16 | 0.51009156 | a.60.5.1  | 1 |
| 1m15a   | a.83.1.1 | 94  | 6.39  | 7.28  | 8.89  | 0.6881869  | a.77.1.2  | 1 |
| 1hc2_   | a.85.1.1 | 131 | 8.34  | 7.86  | 12.11 | 0.83532181 | a.85.1.1  | 5 |
| d1lla_1 | a.85.1.1 | 108 | 6.65  | 12.4  | 14.3  | 0.95274841 | a.85.1.1  | 4 |
| d1kz7a1 | a.87.1.1 | 195 | 11.88 | 9.79  | 14.96 | 0.68034169 | a.63.1.1  | 1 |
| 1boua   | a.88.1.1 | 132 | 6.72  | 7.47  | 12.12 | 0.73290651 | a.88.1.1  | 5 |
| 2pde_   | a.9.1.1  | 43  | 1.46  | 6.58  | 7.99  | 0.620554   | a.9.1.1   | 4 |
| 1bbl_   | a.9.1.1  | 37  | 1.28  | 3.22  | 4.79  | 0.24793174 | a.5.1.1   | 1 |
| 1bgf_   | a.90.1.1 | 124 | 5.37  | 6.21  | 12.1  | 0.93959061 | a.90.1.1  | 5 |
| 1dk8a   | a.91.1.1 | 147 | 8.28  | 9.13  | 18.08 | 0.72181314 | a.24.13.1 | 1 |
| 1FQJB   | a.91.1.1 | 147 | 8.48  | 9.78  | 14.48 | 0.4436977  | a.118.8.1 | 1 |
| 1a9xa   | a.92.1.1 | 153 | 8.3   | 9.38  | 10.76 | 0.99069494 | a.92.1.1  | 5 |
| 1jj2o   | a.94.1.1 | 143 | 9.33  | 21.31 | 24.11 | 0.52822612 | a.94.1.1  | 5 |
| 1aa7a   | a.95.1.1 | 158 | 10.43 | 9.83  | 12.42 | 0.88418846 | a.95.1.1  | 5 |
| 1nkua   | a.96.1.4 | 187 | 12.33 | 12.7  | 13.77 | 0.34193891 | a.96.1.4  | 5 |
| 1j09a   | a.97.1.1 | 163 | 7.18  | 9.03  | 13.8  | 0.69319846 | a.97.1.1  | 5 |
| 1wiu_   | b.1.1.4  | 93  | 4.01  | 6.56  | 10.94 | 0.92277441 | b.1.1.4   | 5 |
| 3NCMA   | b.1.1.4  | 92  | 4.72  | 6.91  | 14.08 | 0.74827239 | b.61.3.1  | 1 |
| 1GYUA   | b.1.10.2 | 140 | 9.72  | 10.24 | 15.95 | 0.51715735 | b.61.1.1  | 1 |
| 1gyva   | b.1.10.2 | 120 | 7.86  | 8.23  | 11.23 | 0.88941262 | b.1.10.2  | 5 |
| d1l4ia1 | b.1.11.1 | 120 | 10.18 | 10.32 | 10.87 | 0.41881147 | f.4.1.1   | 0 |
| d1qpxa1 | b.1.11.1 | 124 | 9.98  | 22.24 | 25.36 | 0.31041466 | b.61.1.1  | 1 |
| 4kbpa   | b.1.12.1 | 112 | 8.08  | 10.13 | 11.71 | 0.51941897 | d.54.1.1  | 0 |
| 1dqia   | b.1.13.1 | 124 | 10.04 | 9.77  | 11.28 | 0.23983169 | d.131.1.2 | 0 |
| 1dfx_   | b.1.13.1 | 89  | 6.33  | 6.15  | 8.56  | 0.94009584 | b.61.4.1  | 1 |
| 1f00i   | b.1.14.1 | 89  | 4.06  | 8.54  | 12.95 | 0.65040356 | b.101.1.1 | 1 |

|       |           |     |       |       |       |            |           |   |
|-------|-----------|-----|-------|-------|-------|------------|-----------|---|
| 1cwva | b.1.14.1  | 91  | 7.18  | 6.89  | 9.83  | 0.82998329 | b.24.1.1  | 1 |
| 1ifra | b.1.16.1  | 113 | 8.55  | 9.6   | 14.58 | 0.92129447 | b.1.16.1  | 5 |
| 1ivtA | b.1.16.1  | 122 | 9.52  | 10.33 | 14.51 | 0.27613567 | b.54.1.1  | 1 |
| 1M42A | b.1.18.17 | 102 | 9.85  | 8.97  | 11.24 | 0.46469297 | b.1.18.1  | 3 |
| 1lmia | b.1.19.1  | 131 | 10.27 | 12.58 | 17.23 | 0.24251138 | b.60.1.2  | 1 |
| 1ten_ | b.1.2.1   | 89  | 3.11  | 2.84  | 6.55  | 0.99988597 | b.1.2.1   | 5 |
| 1fna_ | b.1.2.1   | 91  | 5.63  | 4.77  | 7.58  | 0.98132069 | b.1.2.1   | 4 |
| 1o75a | b.1.20.1  | 82  | 3.94  | 6.76  | 10.82 | 0.90523787 | d.47.1.1  | 0 |
| 1o75a | b.1.20.1  | 126 | 10.37 | 12.3  | 15.6  | 0.08680342 | a.28.1.1  | 0 |
| 1b4ra | b.1.3.1   | 80  | 7.76  | 7.75  | 9.02  | 0.53040685 | d.17.2.1  | 0 |
| 1jz8a | b.1.4.1   | 105 | 8.9   | 8.94  | 8.94  | 0.74615139 | b.1.2.1   | 2 |
| 1bhga | b.1.4.1   | 103 | 6.01  | 6.96  | 8.1   | 0.91933743 | b.1.4.1   | 5 |
| 1f13a | b.1.5.1   | 101 | 8.32  | 7.43  | 8.85  | 0.61603435 | b.1.18.2  | 2 |
| 1l9na | b.1.5.1   | 99  | 8.3   | 7.58  | 9.01  | 0.68914347 | b.1.1.2   | 2 |
| 1ncg_ | b.1.6.1   | 99  | 6.96  | 7.41  | 10.62 | 0.77260862 | d.19.1.1  | 0 |
| 1SUH  | b.1.6.1   | 146 | 11.03 | 9.99  | 9.99  | 0.22993371 | b.61.1.1  | 1 |
| 1HZKA | b.1.7.1   | 110 | 8.18  | 9.94  | 12.18 | 0.52720334 | b.12.1.1  | 1 |
| 1ACX  | b.1.7.1   | 108 | 7.25  | 9.43  | 13.3  | 0.70277705 | b.61.4.1  | 1 |
| 1ej8a | b.1.8.1   | 140 | 10.37 | 12.5  | 16.04 | 0.15809286 | a.118.8.1 | 0 |
| 1IBHA | b.1.8.1   | 151 | 11.56 | 10.43 | 13.57 | 0.22650896 | b.1.8.1   | 4 |
| 1ijaa | b.100.1.1 | 148 | 11.07 | 11.01 | 11.34 | 0.60538061 | b.60.1.2  | 1 |
| 1e44b | b.101.1.1 | 96  | 7.06  | 8.28  | 13.66 | 0.8818238  | b.101.1.1 | 5 |
| 1k91a | b.104.1.1 | 37  | 3.85  | 7.14  | 10.06 | 0.01411067 | d.28.1.1  | 0 |
| 1k9cA | b.104.1.1 | 74  | 8.21  | 13.31 | 15.78 | 0.13475447 | a.60.5.1  | 0 |
| 1nj4a | b.105.1.1 | 93  | 6.58  | 8.36  | 13.31 | 0.64349528 | b.105.1.1 | 5 |
| 1k0ha | b.106.1.2 | 117 | 8.09  | 12.53 | 16.33 | 0.48037618 | b.61.4.1  | 1 |
| 1eara | b.107.1.1 | 74  | 4.41  | 5.32  | 7.53  | 0.94929963 | b.107.1.1 | 4 |
| 1gmua | b.107.1.1 | 70  | 5.3   | 5.52  | 7.95  | 0.81629382 | b.107.1.1 | 5 |
| 1f53a | b.11.1.4  | 84  | 6.69  | 7.75  | 9.52  | 0.53258031 | b.101.1.1 | 1 |
| 1g6ea | b.11.1.6  | 87  | 6.64  | 9.62  | 11.66 | 0.7159472  | d.50.2.1  | 0 |
| 1K8HA | b.111.1.1 | 133 | 9.59  | 11.5  | 15.1  | 0.28657491 | c.16.1.1  | 0 |
| 1J1HA | b.111.1.1 | 144 | 10.56 | 12.88 | 14.6  | 0.34792488 | b.111.1.1 | 4 |
| 1js8a | b.112.1.1 | 101 | 8.36  | 8.5   | 9.56  | 0.83653185 | b.112.1.1 | 5 |
| 1k3xa | b.113.1.1 | 124 | 9.1   | 11.94 | 15.66 | 0.53515239 | b.60.1.2  | 1 |

|         |           |     |       |       |       |            |           |   |
|---------|-----------|-----|-------|-------|-------|------------|-----------|---|
| 1ee8a   | b.113.1.1 | 121 | 8.14  | 10.4  | 13.51 | 0.67924559 | c.47.1.3  | 0 |
| 1m1ha   | b.114.1.1 | 81  | 4.25  | 5.36  | 11.26 | 0.83266463 | b.61.3.1  | 1 |
| 1gzta   | b.115.1.1 | 114 | 8.29  | 8.58  | 10    | 0.73920662 | b.61.4.1  | 1 |
| 1o70a   | b.118.1.1 | 140 | 9.95  | 8.5   | 9.72  | 0.47770367 | b.118.1.1 | 5 |
| 1lox_   | b.12.1.1  | 111 | 8.39  | 9.15  | 10.6  | 0.37677348 | d.85.1.1  | 0 |
| d1bu8a1 | b.12.1.2  | 114 | 8.17  | 16.06 | 19.67 | 0.64878067 | b.12.1.1  | 3 |
| d1phm_1 | b.13.1.2  | 154 | 12.75 | 16.13 | 19.64 | 0.09477617 | d.20.1.2  | 0 |
| d1k5ja_ | b.13.3.1  | 105 | 8.77  | 11.75 | 13.56 | 0.53337102 | b.61.1.1  | 1 |
| 1shsa   | b.15.1.1  | 115 | 8.08  | 10.97 | 13.36 | 0.72846299 | b.15.1.1  | 5 |
| 1ejfa   | b.15.1.2  | 110 | 8.78  | 6.87  | 8.67  | 0.57256043 | b.15.1.2  | 5 |
| 1IFGA   | b.16.1.1  | 140 | 12.2  | 12.9  | 15.76 | 0.11901303 | d.32.1.3  | 0 |
| 1ECY    | b.16.1.1  | 142 | 12.04 | 13.45 | 16.21 | 0.08441208 | b.60.1.2  | 1 |
| 1GMMa   | b.18.1.10 | 133 | 8.25  | 10.87 | 13.59 | 0.41377255 | b.61.4.1  | 1 |
| 1I7la   | b.18.1.16 | 121 | 10.09 | 10.72 | 12.36 | 0.17088338 | a.27.1.1  | 0 |
| 1ahsa   | b.19.1.1  | 126 | 10.05 | 10.92 | 13.38 | 0.32766821 | b.60.1.2  | 1 |
| 1e5ba   | b.2.2.1   | 87  | 3.09  | 7.4   | 12.85 | 0.97744025 | b.61.4.1  | 1 |
| 1XBD    | b.2.2.1   | 87  | 3.49  | 7.71  | 13.66 | 0.97557696 | b.61.4.1  | 1 |
| 1AMX    | b.2.3.1   | 180 | 12.56 | 21.06 | 26.03 | 0.14320907 | b.2.4.1   | 2 |
| 1bv8A   | b.2.4.1   | 138 | 10.47 | 8.28  | 10.64 | 0.60733991 | b.2.4.1   | 4 |
| 1eanA   | b.2.5.6   | 114 | 7.93  | 10.64 | 15.27 | 0.43417577 | d.87.1.1  | 0 |
| 1CO1A   | b.2.5.6   | 115 | 8.37  | 11.59 | 12.99 | 0.503352   | b.60.1.2  | 1 |
| 1aly_   | b.22.1.1  | 146 | 11.94 | 12.4  | 14.28 | 0.15977352 | d.32.1.3  | 0 |
| 1sfp_   | b.23.1.1  | 111 | 8.49  | 8.28  | 10.28 | 0.4575482  | b.61.4.1  | 1 |
| 1n7oa   | b.24.1.1  | 76  | 3.23  | 3.35  | 5.67  | 0.98138859 | b.24.1.1  | 4 |
| d1f1sa3 | b.24.1.1  | 65  | 3.37  | 3.98  | 6.12  | 0.97731257 | b.24.1.1  | 4 |
| 1lgpa   | b.26.1.2  | 113 | 7.78  | 9.86  | 12.98 | 0.67008811 | d.110.1.1 | 0 |
| 1k3jA   | b.26.1.2  | 151 | 12.07 | 11.88 | 14.88 | 0.12051222 | b.42.1.1  | 1 |
| 1IS3A   | b.29.1.3  | 135 | 9.67  | 11.51 | 15.58 | 0.30916768 | b.29.1.3  | 4 |
| 1j18a   | b.3.1.1   | 99  | 7.75  | 8.51  | 14.08 | 0.59655507 | d.1.1.2   | 0 |
| 1acz_   | b.3.1.1   | 108 | 8.38  | 9.05  | 12.19 | 0.60229086 | b.45.1.1  | 1 |
| 1h8la   | b.3.2.1   | 79  | 2.93  | 4.56  | 5.84  | 0.96408871 | b.3.2.1   | 5 |
| 1f86a   | b.3.4.1   | 115 | 9.01  | 7.34  | 10.34 | 0.86134662 | b.3.4.1   | 5 |
| 1d2oa   | b.3.5.1   | 90  | 5.71  | 6.4   | 9.78  | 0.94219925 | b.1.2.1   | 1 |
| 1d2pa   | b.3.5.1   | 96  | 6     | 5.19  | 8.23  | 0.95351046 | b.1.1.2   | 1 |

|         |           |     |       |       |       |            |           |   |
|---------|-----------|-----|-------|-------|-------|------------|-----------|---|
| 1rie_   | b.33.1.1  | 127 | 9.78  | 8.78  | 12.05 | 0.36935173 | b.33.1.1  | 5 |
| 1BYMA   | b.34.1.2  | 97  | 6.48  | 8.75  | 13.72 | 0.85728032 | b.34.1.2  | 4 |
| 1ixda   | b.34.10.1 | 104 | 9.52  | 11.4  | 13.44 | 0.29629125 | d.16.1.6  | 0 |
| 1lpla   | b.34.10.1 | 95  | 7.15  | 9.7   | 12.63 | 0.66353369 | b.61.4.1  | 1 |
| 1m9sa   | b.34.11.1 | 75  | 6.35  | 7.91  | 11.36 | 0.72087118 | b.1.2.1   | 1 |
| 1m9sa   | b.34.11.1 | 86  | 5.3   | 7.22  | 8.93  | 0.732704   | b.34.11.1 | 5 |
| 1BK2    | b.34.2.1  | 57  | 3.36  | 3.43  | 6.79  | 0.95425274 | b.34.2.1  | 4 |
| 1kikA   | b.34.2.1  | 57  | 2.98  | 3.1   | 3.91  | 0.985885   | b.34.2.1  | 4 |
| 1lvk_   | b.34.3.1  | 46  | 2.27  | 3.52  | 4.23  | 0.9281916  | b.34.3.1  | 5 |
| d2mysa1 | b.34.3.1  | 46  | 1.4   | 1.96  | 2.81  | 0.95959188 | b.34.3.1  | 4 |
| 1vie_   | b.34.4.1  | 60  | 4.77  | 6.71  | 9.2   | 0.69779803 | d.58.23.1 | 0 |
| d1rl2a1 | b.34.5.3  | 70  | 2.55  | 6.54  | 10.75 | 0.8853059  | b.114.1.1 | 1 |
| 1m1ga   | b.34.5.4  | 58  | 1.73  | 5.13  | 7.74  | 0.94905441 | g.18.1.1  | 0 |
| 3vub_   | b.34.6.1  | 101 | 7.67  | 9.79  | 14.22 | 0.48106193 | d.87.1.1  | 0 |
| 1c0ma   | b.34.7.1  | 53  | 2.35  | 4.03  | 5.81  | 0.94176143 | d.9.1.1   | 0 |
| 1ex4a   | b.34.7.1  | 48  | 2.11  | 2.19  | 3.16  | 0.98022726 | b.34.7.1  | 5 |
| 1hyoa   | b.34.8.1  | 118 | 8.8   | 7.85  | 11.95 | 0.62884044 | a.80.1.1  | 0 |
| 1G5VA   | b.34.9.1  | 88  | 6.74  | 8.92  | 10.45 | 0.68819378 | d.58.18.1 | 0 |
| 1khca   | b.34.9.2  | 135 | 11    | 9.65  | 11.44 | 0.25603893 | a.74.1.1  | 0 |
| 1p3ha   | b.35.1.1  | 99  | 8.8   | 9.99  | 13.95 | 0.36022453 | b.61.2.1  | 1 |
| 1g31a   | b.35.1.1  | 107 | 9.06  | 10.09 | 14.06 | 0.43378625 | c.47.1.2  | 0 |
| 1auua   | b.35.2.1  | 55  | 3.7   | 4.24  | 6.48  | 0.97235197 | b.35.2.1  | 5 |
| 1GQ4A   | b.36.1.1  | 90  | 5.85  | 7.87  | 9.49  | 0.97612053 | b.36.1.1  | 4 |
| 1g9oa   | b.36.1.1  | 91  | 5.4   | 8.36  | 9.51  | 0.90843226 | b.36.1.1  | 5 |
| 1FGP    | b.37.1.1  | 70  | 3.65  | 7.77  | 10.76 | 0.63268612 | g.3.11.2  | 0 |
| 1ljoa   | b.38.1.1  | 75  | 3.29  | 4.86  | 9.32  | 0.97980706 | b.38.1.1  | 5 |
| 1ib8a   | b.38.2.1  | 74  | 3.78  | 6.58  | 7.94  | 0.89368291 | b.38.2.1  | 5 |
| 1whi_   | b.39.1.1  | 122 | 8.97  | 9.43  | 13.77 | 0.29720778 | d.14.1.7  | 0 |
| 1c3ga   | b.4.1.1   | 80  | 5.75  | 5.29  | 5.29  | 0.97160263 | b.4.1.1   | 5 |
| 1c3ga   | b.4.1.1   | 90  | 7.56  | 7.78  | 9.8   | 0.74733986 | b.4.1.1   | 5 |
| 1ENA    | b.40.1.1  | 135 | 10.08 | 8.94  | 13.5  | 0.48288031 | c.37.1.19 | 0 |
| 1BOVA   | b.40.2.1  | 69  | 2.89  | 5.36  | 6.69  | 0.99419587 | b.40.2.1  | 4 |
| 1jb3a   | b.40.3.2  | 127 | 10.75 | 11.73 | 13.39 | 0.23809197 | a.24.16.1 | 0 |
| 1jc7A   | b.40.3.2  | 129 | 11    | 11.54 | 12.78 | 0.21809035 | a.29.2.1  | 0 |

|         |          |     |       |       |       |            |           |   |
|---------|----------|-----|-------|-------|-------|------------|-----------|---|
| 1CSQ    | b.40.4.5 | 67  | 3.47  | 3.08  | 3.28  | 0.99067884 | b.40.4.5  | 4 |
| 1INO    | b.40.5.1 | 175 | 12.63 | 11.63 | 14.09 | 0.29950723 | b.40.5.1  | 4 |
| 2PRD    | b.40.5.1 | 174 | 12.24 | 11.01 | 12.08 | 0.27958742 | b.40.5.1  | 4 |
| 1h9ra   | b.40.6.2 | 62  | 1.68  | 4.82  | 7.96  | 0.99588122 | b.40.6.2  | 5 |
| 1k0sa   | b.40.7.1 | 151 | 11.27 | 10.77 | 11.53 | 0.6698368  | b.40.7.1  | 5 |
| 1k28a   | b.40.8.1 | 124 | 10.49 | 11.13 | 11.13 | 0.17574034 | c.84.1.1  | 0 |
| 1j6qa   | b.40.9.1 | 100 | 6.37  | 6.23  | 11.74 | 0.70667243 | b.40.9.1  | 5 |
| 1J6QA   | b.40.9.1 | 136 | 10.48 | 11.04 | 13.88 | 0.18118142 | b.60.1.3  | 1 |
| 2BFH    | b.42.1.1 | 128 | 9.02  | 9.76  | 13.27 | 0.60353432 | d.131.1.2 | 0 |
| 1IJTA   | b.42.1.1 | 128 | 8.7   | 7.86  | 12.54 | 0.45069542 | b.42.1.1  | 4 |
| 1mc9A   | b.42.2.1 | 126 | 6.79  | 11.02 | 12.68 | 0.78954761 | b.60.1.1  | 1 |
| 1knma   | b.42.2.1 | 129 | 7.23  | 11.2  | 11.56 | 0.61571554 | d.82.2.1  | 0 |
| 1jlxa   | b.42.3.1 | 153 | 12.16 | 12.45 | 13.04 | 0.12084854 | d.134.1.1 | 0 |
| 1jlxa   | b.42.3.1 | 146 | 11.09 | 11.92 | 12.56 | 0.24847009 | b.42.3.1  | 5 |
| 1TIE    | b.42.4.1 | 172 | 12.49 | 15.93 | 18.16 | 0.1054876  | b.60.1.2  | 1 |
| 1hcd_   | b.42.5.2 | 118 | 9.96  | 10.66 | 13.53 | 0.39754697 | b.60.1.2  | 1 |
| 1d1na   | b.43.3.1 | 99  | 8.42  | 9.18  | 13.3  | 0.66444545 | d.109.1.1 | 0 |
| 1kzla   | b.43.4.3 | 92  | 4.98  | 4.95  | 5.16  | 0.99883672 | b.43.4.3  | 5 |
| 1exma   | b.44.1.1 | 93  | 8.48  | 7     | 12.58 | 0.51746239 | b.44.1.1  | 5 |
| d1kk1a2 | b.44.1.1 | 89  | 6.12  | 5.41  | 8.42  | 0.98754863 | b.44.1.1  | 4 |
| 1flma   | b.45.1.1 | 122 | 10.66 | 10.94 | 14.01 | 0.11557189 | a.45.1.1  | 0 |
| 1ejea   | b.45.1.2 | 192 | 12.87 | 13.38 | 16.07 | 0.15559005 | c.45.1.1  | 0 |
| 1fmta   | b.46.1.1 | 108 | 7.85  | 7.12  | 10.93 | 0.62708585 | b.46.1.1  | 5 |
| 1kxc_   | b.47.1.3 | 158 | 11.12 | 10.35 | 14.11 | 0.35311793 | b.47.1.3  | 4 |
| 2SNV    | b.47.1.3 | 151 | 11.08 | 9.21  | 12.67 | 0.5584526  | b.47.1.3  | 4 |
| 1bco_   | b.48.1.1 | 80  | 5.48  | 5.6   | 6.81  | 0.76579857 | b.48.1.1  | 5 |
| 1e79a   | b.49.1.1 | 76  | 5.07  | 6.36  | 8.24  | 0.78509024 | b.49.1.1  | 5 |
| 1e79d   | b.49.1.1 | 73  | 4.03  | 5.56  | 8.22  | 0.86351606 | b.49.1.1  | 5 |
| 1hoe_   | b.5.1.1  | 74  | 5.83  | 8.79  | 10.93 | 0.80554499 | g.18.1.1  | 0 |
| 3TLHA   | b.50.1.1 | 99  | 5.97  | 10.53 | 11.29 | 0.64698169 | c.78.2.1  | 0 |
| 1FB7A   | b.50.1.1 | 99  | 6.72  | 11.01 | 11.76 | 0.708933   | c.78.2.1  | 0 |
| 1bw3_   | b.52.1.2 | 125 | 10.18 | 10.57 | 14.07 | 0.12971312 | c.47.2.1  | 0 |
| 1cr5a   | b.52.2.3 | 82  | 7.55  | 8.4   | 9.55  | 0.47465406 | b.114.1.1 | 1 |
| d1qcsa1 | b.52.2.3 | 86  | 7.26  | 7.9   | 9.41  | 0.70316507 | b.52.2.3  | 4 |

|         |          |     |       |       |       |            |           |   |
|---------|----------|-----|-------|-------|-------|------------|-----------|---|
| 1dfup   | b.53.1.1 | 94  | 4.85  | 5.27  | 7.89  | 0.88271955 | b.53.1.1  | 5 |
| 1cl3A   | b.54.1.1 | 138 | 11.29 | 11.66 | 15.53 | 0.19150957 | a.1.1.2   | 0 |
| 1lO4D   | b.54.1.1 | 141 | 11.64 | 9.76  | 14.85 | 0.15837063 | d.218.1.1 | 0 |
| 1btn_   | b.55.1.1 | 106 | 7.77  | 7.64  | 9.86  | 0.75960009 | b.55.1.1  | 5 |
| d1ytf2  | b.56.1.1 | 65  | 4.83  | 9.02  | 10.24 | 0.57863937 | g.30.1.1  | 0 |
| 1yafc   | b.56.1.1 | 46  | 2.09  | 5.01  | 9.13  | 0.91958481 | b.34.1.1  | 1 |
| 1pkla   | b.58.1.1 | 99  | 7.15  | 10.15 | 13.07 | 0.66978348 | b.58.1.1  | 5 |
| 1e0ta   | b.58.1.1 | 98  | 6.51  | 9.14  | 13.09 | 0.57074246 | b.1.1.4   | 1 |
| d1ik9a1 | b.59.1.1 | 117 | 9.71  | 18.08 | 20.02 | 0.79658648 | d.13.1.1  | 0 |
| 1b3iA   | b.6.1.1  | 97  | 6.47  | 7.72  | 9.46  | 0.86956567 | b.61.4.1  | 1 |
| 1BXUA   | b.6.1.1  | 91  | 6.72  | 7.81  | 8.14  | 0.94285781 | b.48.1.1  | 1 |
| 1kzqa   | b.6.2.1  | 124 | 9.47  | 9.29  | 13.17 | 0.37651614 | b.61.4.1  | 1 |
| 1kzqa   | b.6.2.1  | 129 | 10.26 | 9.3   | 11.21 | 0.21240044 | d.110.3.1 | 0 |
| 1EIOA   | b.60.1.2 | 127 | 5.87  | 3.72  | 5.32  | 0.99930356 | b.60.1.2  | 4 |
| 2lZB    | b.61.1.1 | 122 | 9.2   | 8.67  | 11.21 | 0.80728057 | b.61.1.1  | 4 |
| 1PTSA   | b.61.1.1 | 121 | 9.44  | 8.43  | 9.35  | 0.55128117 | c.51.2.1  | 0 |
| 1jiwi   | b.61.2.1 | 105 | 7.97  | 9.53  | 11.88 | 0.68478034 | a.60.9.1  | 0 |
| 1smpi   | b.61.2.1 | 100 | 7.72  | 9.89  | 11.97 | 0.51990589 | b.61.2.1  | 4 |
| 1ei5a   | b.61.3.1 | 82  | 3.68  | 8.86  | 11.31 | 0.60180756 | b.61.4.1  | 2 |
| 1ei5a   | b.61.3.1 | 103 | 8.95  | 9.43  | 12.3  | 0.28671967 | d.95.2.2  | 0 |
| 1jmxa   | b.61.4.1 | 119 | 10.03 | 8.09  | 13.84 | 0.58123298 | b.61.4.1  | 4 |
| 1jjua   | b.61.4.1 | 108 | 5.68  | 6.34  | 7.42  | 0.97660041 | b.61.4.1  | 4 |
| 1k3ba   | b.61.5.1 | 119 | 9.96  | 10.76 | 11.91 | 0.50548425 | b.1.1.1   | 1 |
| 2nul_   | b.62.1.1 | 163 | 12.15 | 11.72 | 15    | 0.09475947 | b.62.1.1  | 4 |
| 2cpl_   | b.62.1.1 | 164 | 12.32 | 12.33 | 13.93 | 0.24408825 | b.62.1.1  | 5 |
| 1qtuA   | b.63.1.1 | 115 | 9     | 10.44 | 12.84 | 0.32736769 | b.63.1.1  | 4 |
| 1a1x_   | b.63.1.1 | 106 | 8.53  | 9.44  | 12.7  | 0.45925141 | b.40.4.4  | 1 |
| 1gp0a   | b.64.1.1 | 133 | 10.57 | 11.14 | 12.86 | 0.26444678 | b.60.1.2  | 1 |
| 1E6FA   | b.64.1.1 | 143 | 11.06 | 15.59 | 18.45 | 0.33607623 | b.60.1.1  | 1 |
| 1f3ua   | b.65.1.1 | 118 | 9.72  | 12.05 | 16.03 | 0.29839631 | b.65.1.1  | 5 |
| 1rlw_   | b.7.1.1  | 126 | 10.55 | 9.11  | 12.85 | 0.31005496 | d.129.3.1 | 0 |
| 1BYNA   | b.7.1.2  | 128 | 10.55 | 7.7   | 9.6   | 0.41243537 | b.7.1.2   | 4 |
| d1l4ia2 | b.7.2.1  | 85  | 4.4   | 15.72 | 18.75 | 0.77303585 | b.1.1.4   | 1 |
| 1qpxa   | b.7.2.1  | 91  | 6.41  | 7.4   | 12.17 | 0.60360747 | b.1.2.1   | 1 |

|         |          |     |       |       |       |            |           |   |
|---------|----------|-----|-------|-------|-------|------------|-----------|---|
| 1who_   | b.7.3.1  | 94  | 4.94  | 7     | 9.78  | 0.70341506 | d.93.1.1  | 0 |
| d1dcea2 | b.7.4.1  | 110 | 9.39  | 8.49  | 11.45 | 0.53636425 | c.51.1.1  | 0 |
| 1lwha   | b.71.1.1 | 50  | 2.09  | 4.88  | 6.88  | 0.83853889 | b.34.5.4  | 1 |
| 1kwga   | b.71.1.1 | 54  | 2.84  | 4.98  | 5.99  | 0.92243426 | b.71.1.1  | 5 |
| 1e0IA   | b.72.1.1 | 37  | 0.75  | 3.56  | 4.72  | 0.69427158 | b.72.1.1  | 4 |
| 1aiw_   | b.72.2.1 | 62  | 5.98  | 7.76  | 10.12 | 0.43593518 | d.58.7.1  | 0 |
| 1ed7a   | b.72.2.1 | 45  | 3.31  | 5.16  | 8.52  | 0.31249065 | b.84.2.2  | 1 |
| 1dkga   | b.73.1.1 | 59  | 3.8   | 6.45  | 9.99  | 0.75998975 | d.71.1.1  | 0 |
| 1C3KA   | b.77.3.1 | 147 | 11.05 | 12.56 | 15.89 | 0.21357593 | b.77.3.1  | 4 |
| 1NPLA   | b.78.1.1 | 109 | 6.06  | 9.22  | 13.73 | 0.68924649 | b.60.1.2  | 1 |
| 1LB4A   | b.8.1.1  | 159 | 12.92 | 13.16 | 15.53 | 0.24156126 | b.8.1.1   | 4 |
| 1ee6a   | b.80.1.1 | 197 | 13.29 | 15.21 | 18.36 | 0.03775024 | b.29.1.6  | 1 |
| 1EZGA   | b.80.2.1 | 84  | 8.2   | 10.32 | 11.13 | 0.42026388 | a.58.1.1  | 0 |
| 1hf2a   | b.80.3.1 | 107 | 7.3   | 9.05  | 11.85 | 0.42956208 | b.71.1.1  | 1 |
| 1EWWA   | b.81.2.1 | 90  | 8.03  | 10    | 11.62 | 0.56060627 | d.93.1.1  | 0 |
| 1EPOA   | b.82.1.1 | 185 | 13.63 | 13.4  | 17.23 | 0.04843318 | d.14.1.3  | 0 |
| 1ft9a   | b.82.3.1 | 132 | 7.44  | 9.72  | 13.75 | 0.81838643 | d.224.1.1 | 0 |
| 1o7fa   | b.82.3.2 | 124 | 8.09  | 8.52  | 12.54 | 0.51897125 | c.20.1.1  | 0 |
| 2ARA    | b.82.4.1 | 149 | 10.51 | 9.97  | 10.51 | 0.31798394 | b.82.4.1  | 4 |
| 1wapa   | b.82.5.1 | 68  | 4.72  | 6.89  | 8.58  | 0.74574957 | b.82.5.1  | 5 |
| 1ig0a   | b.82.6.1 | 96  | 8.08  | 10.38 | 13.31 | 0.35603701 | b.93.1.1  | 1 |
| 1ig3a   | b.82.6.1 | 85  | 7.3   | 8.46  | 8.99  | 0.75988074 | b.71.1.1  | 1 |
| 1qiua   | b.83.1.1 | 77  | 6.13  | 11.76 | 12.8  | 0.52083209 | d.58.1.5  | 0 |
| 1kkea   | b.83.1.2 | 143 | 12.07 | 12.45 | 14.98 | 0.30616645 | d.58.39.1 | 0 |
| 1ghk_   | b.84.1.1 | 79  | 6.4   | 7.54  | 9.75  | 0.80819752 | b.84.1.1  | 5 |
| 1dd2a   | b.84.1.1 | 77  | 3.07  | 4.07  | 6.41  | 0.99745297 | b.84.1.1  | 5 |
| 1kjqa   | b.84.2.1 | 74  | 3.98  | 4.35  | 10.61 | 0.83843254 | b.84.2.1  | 5 |
| 1e2wa   | b.84.2.2 | 64  | 2.62  | 5.81  | 7.66  | 0.97673799 | b.84.2.2  | 5 |
| 1f3g_   | b.84.3.1 | 150 | 9.61  | 12.3  | 16.13 | 0.15350013 | b.60.1.1  | 1 |
| 1GZI    | b.85.1.1 | 65  | 3.64  | 6.53  | 8.37  | 0.85992555 | a.164.1.1 | 0 |
| 1OPS    | b.85.1.1 | 64  | 4.75  | 6.61  | 8.24  | 0.65796389 | a.4.1.1   | 0 |
| 1c5ea   | b.85.2.1 | 95  | 6.81  | 10.08 | 12.89 | 0.68484444 | b.61.4.1  | 1 |
| 4ubpb   | b.85.3.1 | 122 | 9.41  | 13.31 | 17.34 | 0.17742487 | d.105.1.1 | 0 |
| 1DUTA   | b.85.4.1 | 133 | 10.82 | 13.78 | 16.89 | 0.19054995 | b.60.1.2  | 1 |



|         |           |     |       |       |       |            |           |   |
|---------|-----------|-----|-------|-------|-------|------------|-----------|---|
| 1DUN    | b.85.4.1  | 134 | 11.43 | 12.97 | 16.32 | 0.16775509 | b.29.1.3  | 1 |
| 1g8la   | b.85.6.1  | 83  | 5.98  | 8.12  | 9.37  | 0.57756458 | d.68.4.1  | 0 |
| 1n3ja   | b.85.7.2  | 119 | 7.95  | 10.56 | 12.78 | 0.65239472 | b.60.1.2  | 1 |
| 1at0_   | b.86.1.1  | 145 | 9.46  | 9.43  | 13.55 | 0.34924279 | b.61.4.1  | 1 |
| 1jhcA   | b.87.1.1  | 130 | 10.4  | 10.25 | 11.19 | 0.42554368 | b.87.1.1  | 4 |
| 1fwqA   | b.88.1.1  | 115 | 10.24 | 10.87 | 13.88 | 0.14869689 | b.55.1.2  | 1 |
| 3ezma   | b.89.1.1  | 101 | 8.87  | 9.39  | 10.62 | 0.36899843 | a.74.1.1  | 0 |
| 1LOMA   | b.89.1.1  | 101 | 8.87  | 11.96 | 14.09 | 0.39161313 | a.60.13.1 | 0 |
| 1L5CA   | b.9.1.1   | 92  | 8.41  | 8.06  | 12.18 | 0.15426407 | c.47.1.3  | 0 |
| 1lhta   | b.90.1.1  | 104 | 7.9   | 9.11  | 14.74 | 0.76720903 | b.61.2.1  | 1 |
| 1qqha   | b.91.1.1  | 144 | 9.14  | 10.98 | 14.93 | 0.40970211 | b.91.1.1  | 5 |
| 1m7ja   | b.92.1.6  | 61  | 4.57  | 7.21  | 10.68 | 0.72861078 | d.42.1.2  | 0 |
| 1m7ja   | b.92.1.6  | 55  | 3.98  | 6.17  | 10.43 | 0.74798245 | b.34.5.4  | 1 |
| 1aqt_   | b.93.1.1  | 85  | 5.16  | 5.29  | 9.91  | 0.91346745 | b.93.1.1  | 5 |
| 1e79h   | b.93.1.1  | 86  | 4.48  | 9.08  | 10.34 | 0.78707154 | b.60.1.2  | 1 |
| 1JYTA   | b.94.1.1  | 163 | 11.51 | 12.98 | 15.88 | 0.34194128 | d.58.7.3  | 0 |
| 1JOBA   | b.94.1.1  | 162 | 11.33 | 13.82 | 17.81 | 0.26004464 | a.26.1.1  | 0 |
| 1KD6A   | b.97.1.1  | 179 | 13.18 | 13.48 | 15.33 | 0.09057582 | c.36.1.1  | 0 |
| 1dcea   | c.10.2.2  | 124 | 9.5   | 9.59  | 10.7  | 0.83028611 | c.10.2.2  | 5 |
| d1hf2a2 | c.102.1.1 | 99  | 7.47  | 7.14  | 9.84  | 0.91807639 | c.102.1.1 | 4 |
| d1ihna_ | c.103.1.1 | 113 | 7.97  | 7.8   | 12.11 | 0.83462751 | c.51.1.1  | 1 |
| 1jkea   | c.110.1.1 | 145 | 10.6  | 10.38 | 12.95 | 0.47613729 | d.155.1.2 | 0 |
| 1l1sA   | c.114.1.1 | 113 | 4.86  | 9.43  | 10.88 | 0.99958508 | c.114.1.1 | 4 |
| d1jj2k_ | c.12.1.1  | 150 | 10.78 | 23.92 | 28.12 | 0.46420937 | c.61.1.2  | 1 |
| 1jj2n   | c.12.1.1  | 115 | 7.7   | 8.52  | 11.47 | 0.81607722 | c.12.1.1  | 5 |
| 1auz_   | c.13.2.1  | 116 | 6.53  | 4.84  | 6.63  | 0.99165921 | c.13.2.1  | 5 |
| 1cdza   | c.15.1.1  | 96  | 7.26  | 7.64  | 9.1   | 0.81076869 | c.102.1.1 | 1 |
| 1in1a   | c.15.1.2  | 88  | 6.76  | 6.57  | 10.56 | 0.50573898 | c.15.1.2  | 5 |
| 1muga   | c.18.1.2  | 165 | 11.78 | 10.92 | 13.13 | 0.75100057 | c.18.1.2  | 5 |
| d1j5pa1 | c.2.1.3   | 110 | 6.67  | 5.68  | 5.68  | 0.99478636 | c.2.1.8   | 3 |
| 1J3AA   | c.21.1.1  | 142 | 9.93  | 12.56 | 14.56 | 0.43871528 | d.58.39.1 | 0 |
| 1tmy_   | c.23.1.1  | 118 | 3.85  | 2.39  | 3     | 0.99985601 | c.23.1.1  | 5 |
| 1eiwa   | c.23.3.1  | 111 | 7.42  | 6.7   | 9.51  | 0.73428348 | c.51.1.1  | 1 |
| 5NLL    | c.23.5.1  | 138 | 6.41  | 5.18  | 6.03  | 0.99945198 | c.23.5.1  | 4 |

|         |           |     |       |       |       |            |           |   |
|---------|-----------|-----|-------|-------|-------|------------|-----------|---|
| 6NUL    | c.23.5.1  | 138 | 6.27  | 4.75  | 4.9   | 0.99982624 | c.23.5.1  | 4 |
| 1B1A    | c.23.6.1  | 137 | 6.84  | 5.25  | 5.72  | 0.99902152 | c.23.6.1  | 4 |
| 1BE1    | c.23.6.1  | 137 | 6.55  | 5.87  | 6.69  | 0.99732008 | c.23.6.1  | 4 |
| 1CUE    | c.23.9.1  | 197 | 12.73 | 10.55 | 12.53 | 0.95306786 | c.23.9.1  | 4 |
| 1a9xa   | c.24.1.1  | 138 | 8.43  | 8.54  | 9.1   | 0.93972787 | c.23.1.2  | 1 |
| 2pia_   | c.25.1.2  | 120 | 4.13  | 3.8   | 5.07  | 0.99902304 | c.25.1.2  | 5 |
| 1ej2a   | c.26.1.3  | 167 | 9.85  | 8.46  | 10.22 | 0.8221856  | c.37.1.1  | 1 |
| 1dlja   | c.26.3.1  | 108 | 6.35  | 6.42  | 9.48  | 0.75448731 | d.68.1.1  | 0 |
| 1lvl_   | c.3.1.5   | 115 | 5.63  | 4.78  | 5.14  | 0.99744944 | c.3.1.5   | 5 |
| 1b6ra   | c.30.1.1  | 78  | 4.28  | 6.68  | 8.79  | 0.7925022  | c.47.1.5  | 1 |
| 1iow_   | c.30.1.2  | 96  | 5.23  | 5.98  | 7.66  | 0.9772399  | c.30.1.2  | 5 |
| 1d4oa   | c.31.1.4  | 177 | 11.94 | 10.67 | 15.09 | 0.92363428 | c.31.1.4  | 5 |
| 1IM5A   | c.33.1.2  | 180 | 10.62 | 8.66  | 10.46 | 0.99581453 | c.33.1.2  | 4 |
| 1im5a   | c.33.1.2  | 179 | 10.3  | 9.14  | 10.24 | 0.93516805 | c.33.1.2  | 5 |
| 1JR6A   | c.37.1.14 | 142 | 10.99 | 18.39 | 21.67 | 0.89969403 | c.1.2.2   | 1 |
| 1HUQA   | c.37.1.8  | 164 | 9.56  | 9.41  | 9.87  | 0.98159439 | c.37.1.8  | 4 |
| 1BLE    | c.38.1.1  | 163 | 10.02 | 11.75 | 11.82 | 0.9677452  | c.38.1.1  | 4 |
| 1I5aa   | c.43.1.2  | 174 | 12.38 | 12.33 | 17.95 | 0.42156086 | c.2.1.1   | 1 |
| 1jf8a   | c.44.1.1  | 130 | 9.54  | 9.28  | 13.59 | 0.83952122 | c.26.1.3  | 1 |
| 1ljlA   | c.44.1.1  | 130 | 9.51  | 10.75 | 15.01 | 0.78023362 | c.121.1.1 | 1 |
| 1IIBA   | c.44.2.1  | 106 | 4.87  | 5.17  | 6.2   | 0.9913757  | c.44.2.1  | 4 |
| 1h9cA   | c.44.2.1  | 106 | 4.85  | 4.69  | 6.16  | 0.99229005 | c.44.2.1  | 4 |
| 1mkp_   | c.45.1.1  | 144 | 8.6   | 6.22  | 8.37  | 0.91764363 | c.45.1.1  | 5 |
| 1ikzA   | c.45.1.1  | 142 | 8.09  | 6.95  | 11.74 | 0.96180785 | c.45.1.1  | 4 |
| 1GN0A   | c.46.1.3  | 108 | 6.03  | 5.98  | 11.29 | 0.92340667 | c.46.1.3  | 4 |
| 1iloa   | c.47.1.1  | 77  | 3.02  | 2.16  | 3.5   | 0.98422139 | c.47.1.1  | 5 |
| 1H75A   | c.47.1.1  | 81  | 2.31  | 4.95  | 7.39  | 0.99083107 | c.47.1.1  | 4 |
| 1qmha   | c.47.2.1  | 95  | 5.19  | 6.82  | 11.89 | 0.60848627 | c.47.2.1  | 5 |
| d1itza3 | c.48.1.1  | 136 | 7.68  | 8.64  | 12    | 0.86221474 | c.59.1.1  | 1 |
| 1e0ta   | c.49.1.1  | 117 | 4.43  | 3.7   | 3.72  | 0.99978752 | c.49.1.1  | 5 |
| 1a3wa   | c.49.1.1  | 134 | 7.4   | 4.76  | 7.65  | 0.9758172  | c.49.1.1  | 4 |
| d1j6ua1 | c.5.1.1   | 89  | 5.45  | 2.33  | 4.35  | 0.99262172 | c.5.1.1   | 4 |
| 2uaga   | c.5.1.1   | 93  | 2.92  | 2.42  | 3.04  | 0.99878101 | c.5.1.1   | 5 |
| 1qe0a   | c.51.1.1  | 95  | 2.67  | 2.71  | 2.82  | 0.99880703 | c.51.1.1  | 5 |

|         |           |     |       |       |       |            |           |   |
|---------|-----------|-----|-------|-------|-------|------------|-----------|---|
| 1h4vb   | c.51.1.1  | 96  | 3.13  | 3.43  | 5.05  | 0.99111315 | c.51.1.1  | 5 |
| 1crza   | c.51.2.1  | 134 | 9.65  | 8.94  | 9.33  | 0.94968143 | c.51.2.1  | 5 |
| 1nbwb   | c.51.3.2  | 113 | 6.82  | 5.62  | 7.25  | 0.99603772 | c.51.3.2  | 5 |
| 1HH1A   | c.52.1.18 | 143 | 8.49  | 8.6   | 8.84  | 0.95659433 | c.52.1.18 | 4 |
| 1a79a   | c.52.2.1  | 97  | 6.72  | 6.6   | 6.6   | 0.72750297 | c.52.2.1  | 5 |
| 1GHTA   | c.53.1.1  | 105 | 4.88  | 4.74  | 5.59  | 0.97496404 | c.53.1.1  | 4 |
| 1pdo_   | c.54.1.1  | 129 | 5.89  | 4.86  | 6.25  | 0.99873347 | c.54.1.1  | 5 |
| 1ilya   | c.55.4.1  | 90  | 3.71  | 3.55  | 4.62  | 0.99593917 | c.55.4.1  | 5 |
| 1o13A   | c.55.5.1  | 136 | 9.07  | 16.64 | 19.22 | 0.94872448 | c.55.5.1  | 4 |
| 1eo1a   | c.55.5.1  | 124 | 6.92  | 7.25  | 7.25  | 0.99910619 | c.55.5.1  | 5 |
| 1sfe_   | c.55.7.1  | 81  | 3.02  | 5.84  | 8.03  | 0.6644606  | c.55.7.1  | 5 |
| d1qnta2 | c.55.7.1  | 86  | 7.62  | 16.81 | 18.28 | 0.69146511 | a.57.1.1  | 0 |
| 1jlja   | c.57.1.1  | 169 | 10.95 | 9.22  | 11.04 | 0.87152675 | c.57.1.1  | 4 |
| 1DI6A   | c.57.1.1  | 195 | 13.5  | 15.75 | 18.51 | 0.50640372 | c.65.1.1  | 1 |
| 1lu9a   | c.58.1.4  | 96  | 5.51  | 5.78  | 11.33 | 0.82026051 | c.95.1.1  | 1 |
| d1npda2 | c.58.1.5  | 106 | 5.85  | 5.33  | 8.74  | 0.95808431 | c.58.1.4  | 3 |
| 1l1qa   | c.61.1.1  | 181 | 11.74 | 11.85 | 14.04 | 0.92490932 | c.61.1.1  | 5 |
| 1l1rA   | c.61.1.1  | 179 | 11.79 | 10.86 | 13.26 | 0.93557397 | c.61.1.1  | 4 |
| 1mjna   | c.62.1.1  | 179 | 11.13 | 9.41  | 13.99 | 0.96142222 | c.62.1.1  | 4 |
| 1ej0a   | c.66.1.2  | 180 | 10.78 | 8.57  | 10.53 | 0.98728359 | c.66.1.2  | 5 |
| 1ispa   | c.69.1.18 | 179 | 10.74 | 9.52  | 9.76  | 0.98967936 | c.69.1.18 | 5 |
| 1ra9_   | c.71.1.1  | 159 | 11.39 | 12.29 | 13.16 | 0.63194315 | c.25.1.3  | 1 |
| 1duvg   | c.78.1.1  | 150 | 8.9   | 7.15  | 9.51  | 0.98561574 | c.78.1.1  | 5 |
| 1ml4a   | c.78.1.1  | 150 | 8.85  | 7.07  | 8.04  | 0.94147415 | c.78.1.1  | 5 |
| 1b74a   | c.78.2.1  | 105 | 4.96  | 4.08  | 6.99  | 0.99547399 | c.78.2.1  | 5 |
| 1jfla   | c.78.2.1  | 113 | 5.89  | 5.82  | 7.67  | 0.97874902 | c.78.2.1  | 5 |
| 1kbla   | c.8.1.1   | 133 | 8.91  | 8.92  | 13.56 | 0.73820324 | c.8.1.1   | 5 |
| 1a9xb   | c.8.3.1   | 151 | 10.09 | 12.51 | 15.36 | 0.41847523 | c.37.1.17 | 1 |
| 1SRVA   | c.8.5.1   | 145 | 9.1   | 7.86  | 10.47 | 0.92649552 | c.23.1.1  | 1 |
| 1ass_   | c.8.5.2   | 152 | 9.06  | 10.23 | 16.71 | 0.96757746 | c.8.5.2   | 5 |
| 1k2yx   | c.84.1.1  | 109 | 6.19  | 5.54  | 6.27  | 0.97162699 | c.84.1.1  | 5 |
| 1k2yx   | c.84.1.1  | 104 | 4.54  | 5.13  | 6.13  | 0.93104977 | c.84.1.1  | 5 |
| 1ay7b   | c.9.1.1   | 89  | 4.07  | 4.42  | 7.75  | 0.71920688 | c.9.1.1   | 5 |
| 1jj2x   | c.9.2.1   | 142 | 11.56 | 12.86 | 18.03 | 0.72802189 | c.115.1.1 | 1 |

|         |           |     |       |       |       |            |           |   |
|---------|-----------|-----|-------|-------|-------|------------|-----------|---|
| 1GVCA   | c.94.1.2  | 157 | 11.9  | 10.52 | 10.52 | 0.54274068 | c.94.1.2  | 4 |
| 1gv8a   | c.94.1.2  | 159 | 11.26 | 9.66  | 12.25 | 0.44675025 | c.94.1.2  | 5 |
| d1e8ca1 | c.98.1.1  | 101 | 7.53  | 7.3   | 10.71 | 0.93148955 | c.98.1.1  | 4 |
| d1gg4a3 | c.98.1.1  | 98  | 7.25  | 7.11  | 10.47 | 0.92401193 | c.98.1.1  | 4 |
| 1knxa   | c.98.2.1  | 132 | 8.49  | 7.7   | 14.18 | 0.96968628 | c.98.2.1  | 5 |
| 1ko7a   | c.98.2.1  | 129 | 8.29  | 8.14  | 11.68 | 0.96415818 | c.98.2.1  | 4 |
| 1mgrA   | d.1.1.2   | 97  | 8.65  | 9.24  | 11.29 | 0.5631412  | d.1.1.2   | 4 |
| 1MGRA   | d.1.1.2   | 99  | 8.62  | 9.52  | 12.93 | 0.55642793 | d.1.1.2   | 4 |
| 2GCC    | d.10.1.2  | 70  | 3.34  | 5.81  | 7.41  | 0.85772073 | d.10.1.2  | 4 |
| 1KJKA   | d.10.1.4  | 64  | 3.22  | 7.12  | 9.81  | 0.55256619 | d.9.2.1   | 1 |
| 1CQUA   | d.100.1.1 | 56  | 4.19  | 5.02  | 8.78  | 0.58780945 | d.10.1.4  | 1 |
| 1qhka   | d.100.1.2 | 47  | 1.02  | 3.28  | 4.09  | 0.67941385 | d.100.1.2 | 5 |
| d1e3ha6 | d.101.1.1 | 96  | 6.88  | 7.94  | 14.3  | 0.66406153 | d.222.1.1 | 1 |
| d1e3ha5 | d.101.1.1 | 111 | 6.81  | 8.83  | 10.76 | 0.86740234 | d.101.1.1 | 4 |
| 1AVV    | d.102.1.1 | 151 | 11.71 | 44.6  | 46.74 | 0.53416265 | a.74.1.1  | 0 |
| 2nef_   | d.102.1.1 | 136 | 10.62 | 10.97 | 12.48 | 0.43683263 | a.80.1.1  | 0 |
| 1kyfa   | d.105.1.1 | 114 | 8.42  | 10.13 | 13.66 | 0.7624927  | d.105.1.1 | 5 |
| 1e42a   | d.105.1.1 | 113 | 7.94  | 7.43  | 11.41 | 0.91703499 | d.105.1.1 | 5 |
| 1qndA   | d.106.1.1 | 123 | 5.96  | 7.44  | 14.47 | 0.81574074 | d.14.1.3  | 1 |
| 1ikta   | d.106.1.1 | 115 | 5.96  | 6.53  | 13.99 | 0.90287441 | d.106.1.1 | 5 |
| 1Q2CA   | d.108.1.1 | 162 | 10.16 | 9.74  | 11.18 | 0.85145567 | d.108.1.1 | 4 |
| 1qsta   | d.108.1.1 | 160 | 10.15 | 8.87  | 8.87  | 0.93557625 | d.108.1.1 | 5 |
| 1kcqa   | d.109.1.1 | 103 | 6.28  | 6.58  | 11.23 | 0.93756494 | d.109.1.1 | 5 |
| 1svr_   | d.109.1.1 | 94  | 5.33  | 4.22  | 5.03  | 0.98471644 | d.109.1.1 | 4 |
| 1qmea   | d.11.1.1  | 61  | 4.8   | 5.47  | 8.73  | 0.57761746 | d.11.1.1  | 5 |
| 1qmea   | d.11.1.1  | 58  | 2.85  | 4.21  | 9.97  | 0.61212955 | d.11.1.1  | 5 |
| 2PRF    | d.110.1.1 | 125 | 7.36  | 5.86  | 5.86  | 0.96686524 | d.110.1.1 | 4 |
| 1acf_   | d.110.1.1 | 125 | 7.63  | 6.05  | 7.43  | 0.95879276 | d.110.1.1 | 5 |
| 1F9IA   | d.110.3.1 | 125 | 7.83  | 8.29  | 9.89  | 0.48764012 | d.110.3.1 | 4 |
| 1bywa   | d.110.3.3 | 110 | 5.97  | 5.33  | 5.4   | 0.99288824 | d.110.3.3 | 5 |
| 1h8ma   | d.110.4.1 | 140 | 9.39  | 8.01  | 8.71  | 0.98823999 | d.110.4.1 | 5 |
| d1l3la2 | d.110.5.1 | 168 | 10.59 | 9.8   | 12.72 | 0.83597811 | c.57.1.1  | 0 |
| 1cfe_   | d.111.1.1 | 135 | 9.75  | 10.24 | 11.65 | 0.62621913 | a.1.1.2   | 0 |
| 1a3aa   | d.112.1.1 | 145 | 7.7   | 7.6   | 9.66  | 0.81664948 | d.112.1.1 | 5 |

|         |           |     |       |       |       |            |           |   |
|---------|-----------|-----|-------|-------|-------|------------|-----------|---|
| 1a6ja   | d.112.1.1 | 150 | 8.42  | 7.27  | 8.62  | 0.82231297 | d.112.1.1 | 5 |
| 1mut_   | d.113.1.1 | 129 | 8.42  | 8.78  | 12.13 | 0.8195335  | d.113.1.1 | 5 |
| 1dbuA   | d.116.1.1 | 158 | 10.82 | 11.08 | 14.89 | 0.59758735 | c.37.1.1  | 0 |
| 1lba_   | d.118.1.1 | 146 | 10.38 | 9.37  | 10.53 | 0.89841675 | c.16.1.1  | 0 |
| 1jj2r   | d.12.1.1  | 81  | 3.27  | 3.35  | 4.9   | 0.98661791 | d.12.1.1  | 5 |
| 1EHBA   | d.120.1.1 | 82  | 4.72  | 4.76  | 10.31 | 0.44085122 | a.35.1.1  | 0 |
| 1M2MA   | d.120.1.1 | 82  | 4.3   | 5.52  | 9.33  | 0.95224613 | d.120.1.1 | 4 |
| 1i5dA   | d.122.1.3 | 190 | 11.22 | 11.21 | 14.2  | 0.84843977 | d.122.1.3 | 4 |
| 1ID0A   | d.122.1.3 | 152 | 8.42  | 13.29 | 17.6  | 0.63723165 | d.185.1.1 | 1 |
| 1ucaa   | d.124.1.1 | 190 | 13.48 | 12.8  | 16.54 | 0.62907644 | d.124.1.1 | 5 |
| 1ytba   | d.129.1.1 | 85  | 5.12  | 5.55  | 8.58  | 0.90913641 | d.129.1.1 | 5 |
| 1aisa   | d.129.1.1 | 92  | 6.77  | 9.12  | 12.23 | 0.73419119 | d.129.1.1 | 5 |
| 3pmga   | d.129.2.1 | 141 | 9.73  | 11.3  | 12.26 | 0.66619431 | d.129.2.1 | 5 |
| 1k2yx   | d.129.2.1 | 96  | 4.34  | 6.28  | 9.33  | 0.57701543 | d.129.2.1 | 5 |
| 1QMRA   | d.129.3.1 | 159 | 8.5   | 8.2   | 8.56  | 0.97965648 | d.129.3.1 | 4 |
| 1ICXA   | d.129.3.1 | 155 | 8.29  | 6.47  | 10.27 | 0.93735531 | d.129.3.1 | 4 |
| 1F7WA   | d.129.4.1 | 144 | 10.62 | 10.51 | 12.25 | 0.71997062 | a.25.1.1  | 0 |
| 3RHN    | d.13.1.1  | 115 | 7.73  | 7.07  | 7.62  | 0.91344665 | d.13.1.2  | 3 |
| d1mxa_1 | d.130.1.1 | 102 | 5.72  | 10.14 | 13.75 | 0.96791074 | d.130.1.1 | 4 |
| 1b77a   | d.131.1.2 | 110 | 7.6   | 7.45  | 12.63 | 0.93698242 | d.131.1.2 | 5 |
| d1ge8a1 | d.131.1.2 | 116 | 6.9   | 7.29  | 10.62 | 0.88146682 | d.131.1.2 | 4 |
| 1DUJA   | d.135.1.1 | 187 | 11.67 | 11.91 | 14.62 | 0.81058929 | d.135.1.1 | 4 |
| 1byra   | d.136.1.1 | 152 | 9.6   | 9.34  | 12.02 | 0.99448123 | d.136.1.1 | 5 |
| 1g10a   | d.137.1.1 | 102 | 4.65  | 7.26  | 13.12 | 0.89397406 | d.137.1.1 | 5 |
| 1hqi_   | d.137.1.1 | 90  | 5.66  | 6.37  | 7.73  | 0.98933064 | d.137.1.1 | 4 |
| 1a6f_   | d.14.1.2  | 113 | 5.99  | 6.28  | 10.12 | 0.82550306 | d.52.4.1  | 1 |
| 1D6TA   | d.14.1.2  | 117 | 6.56  | 7.82  | 12.19 | 0.66881971 | d.58.20.1 | 1 |
| 1seia   | d.140.1.1 | 130 | 8.47  | 8.28  | 12.05 | 0.91928956 | d.140.1.1 | 5 |
| d1i6ua_ | d.140.1.1 | 129 | 9.29  | 7.96  | 10.94 | 0.95786711 | d.140.1.1 | 4 |
| 1jj2e   | d.141.1.1 | 79  | 2.19  | 1.61  | 4.18  | 0.99503776 | d.141.1.1 | 5 |
| 1rl6a   | d.141.1.1 | 75  | 1.91  | 1.68  | 2.68  | 0.98933762 | d.141.1.1 | 5 |
| 1hska   | d.146.1.1 | 109 | 6.67  | 10.02 | 13.8  | 0.84851298 | d.146.1.1 | 5 |
| 1uxy_   | d.146.1.1 | 142 | 9.87  | 10.02 | 12.99 | 0.50339423 | d.146.1.1 | 5 |
| 1FXTB   | d.15.1.1  | 76  | 2.59  | 2.52  | 5.4   | 0.98725459 | d.15.1.1  | 4 |

|         |           |     |       |       |       |            |           |   |
|---------|-----------|-----|-------|-------|-------|------------|-----------|---|
| 1qf6a   | d.15.10.1 | 61  | 3.13  | 4.09  | 4.5   | 0.73508382 | d.15.3.2  | 2 |
| d1ni3a2 | d.15.10.2 | 82  | 4.68  | 6.75  | 11.62 | 0.43888754 | a.4.5.17  | 0 |
| 1ip9a   | d.15.2.2  | 85  | 6.91  | 8.11  | 11.62 | 0.57783784 | d.15.2.2  | 5 |
| 1f0za   | d.15.3.2  | 66  | 3.14  | 5.99  | 8.89  | 0.84670557 | d.68.3.1  | 1 |
| 1jsbA   | d.15.3.2  | 73  | 3.97  | 8.79  | 11.74 | 0.81407124 | d.74.2.1  | 1 |
| 1DOX    | d.15.4.1  | 96  | 7.08  | 7.12  | 10.45 | 0.51246756 | d.15.4.2  | 3 |
| 1AWD    | d.15.4.1  | 94  | 6.67  | 7.34  | 9.05  | 0.78633918 | d.15.4.1  | 4 |
| 2sak_   | d.15.5.1  | 121 | 8.84  | 11.45 | 14.89 | 0.67901135 | d.15.5.1  | 5 |
| 1c76A   | d.15.5.1  | 121 | 8.93  | 12.11 | 16.37 | 0.48364875 | d.15.5.1  | 4 |
| 1m4va   | d.15.6.1  | 104 | 8.08  | 8.17  | 10.46 | 0.70441275 | d.15.6.1  | 4 |
| 3tss_   | d.15.6.1  | 101 | 8.49  | 8.2   | 10.76 | 0.76699457 | d.15.6.1  | 5 |
| 1GB1    | d.15.7.1  | 56  | 1.47  | 2.01  | 3     | 0.87324491 | d.15.7.1  | 4 |
| 1TIF    | d.15.8.1  | 78  | 3.67  | 5.8   | 7.34  | 0.93393308 | d.15.8.1  | 4 |
| 1f52a   | d.15.9.1  | 100 | 7.4   | 7.44  | 10.85 | 0.66060273 | b.59.1.1  | 0 |
| 1f7la   | d.150.1.2 | 118 | 5.66  | 4.59  | 5.74  | 0.99931817 | d.150.1.2 | 5 |
| 1jjwa   | d.153.1.4 | 173 | 9.82  | 9.33  | 13.1  | 0.99465383 | d.153.1.4 | 5 |
| 1an9a   | d.16.1.3  | 93  | 7.34  | 7.93  | 10.42 | 0.50573155 | c.52.2.1  | 0 |
| 1i8ta   | d.16.1.7  | 69  | 6.04  | 7.24  | 8.45  | 0.47523228 | d.205.1.1 | 1 |
| 1aiha   | d.163.1.1 | 170 | 10.69 | 11.49 | 13.86 | 0.83409709 | a.74.1.1  | 0 |
| 1AE9A   | d.163.1.1 | 179 | 12.16 | 15.19 | 17.03 | 0.60055151 | f.1.4.1   | 0 |
| 1mhda   | d.164.1.1 | 123 | 9.19  | 8.02  | 11.99 | 0.62470134 | d.164.1.1 | 5 |
| 1dtp_   | d.166.1.1 | 190 | 13.35 | 14.93 | 15.88 | 0.42712076 | c.58.1.1  | 0 |
| 1lryA   | d.167.1.1 | 165 | 12.39 | 12.36 | 15.88 | 0.52015015 | a.39.1.8  | 0 |
| 1g2aa   | d.167.1.1 | 164 | 11.16 | 12.98 | 17.07 | 0.51461495 | d.167.1.1 | 5 |
| 1qlaa   | d.168.1.1 | 121 | 9.13  | 9.81  | 15.53 | 0.47001617 | d.109.1.2 | 1 |
| 1chua   | d.168.1.1 | 116 | 7.16  | 9.87  | 12.47 | 0.56312958 | c.59.1.2  | 0 |
| 1tsg_   | d.169.1.4 | 98  | 7.33  | 8.18  | 10.13 | 0.62656997 | b.1.2.1   | 0 |
| 1FUWA   | d.17.1.1  | 91  | 6.9   | 8.52  | 10.14 | 0.57811952 | a.51.1.1  | 0 |
| 1mola   | d.17.1.1  | 94  | 7.93  | 8.18  | 10.52 | 0.59039981 | d.79.1.1  | 1 |
| 1ivwa   | d.17.2.1  | 88  | 6.79  | 5.96  | 8.61  | 0.64193985 | a.80.1.1  | 0 |
| 1ksia   | d.17.2.1  | 93  | 6.32  | 5.64  | 6.23  | 0.9823249  | d.17.2.1  | 5 |
| 1eeja   | d.17.3.1  | 60  | 3.08  | 4.29  | 5.41  | 0.8606898  | d.17.3.1  | 5 |
| 1DMNA   | d.17.4.3  | 131 | 9.21  | 15.49 | 18.2  | 0.88516228 | d.17.4.3  | 4 |
| 8CHO    | d.17.4.3  | 125 | 8.74  | 7.13  | 13.11 | 0.89913912 | d.17.4.3  | 4 |

|         |           |     |       |       |       |            |           |   |
|---------|-----------|-----|-------|-------|-------|------------|-----------|---|
| 1ugia   | d.17.5.1  | 83  | 4.68  | 4.94  | 6.62  | 0.87109625 | d.17.5.1  | 5 |
| 1BY2    | d.170.1.1 | 119 | 9.53  | 13.04 | 13.24 | 0.40620498 | b.43.4.3  | 0 |
| 1mwpa   | d.170.2.1 | 96  | 7.09  | 8.58  | 12.49 | 0.49891436 | a.60.13.1 | 0 |
| 1pcfa   | d.18.1.1  | 66  | 3.12  | 5.88  | 8.31  | 0.75173462 | d.87.1.1  | 1 |
| d1l3aa_ | d.18.1.2  | 166 | 12.28 | 0     | 0     | 0.37076868 | d.162.1.1 | 1 |
| 1i50c   | d.181.1.1 | 131 | 10.7  | 10.72 | 13.67 | 0.32941225 | d.32.1.2  | 1 |
| d1qgwa_ | d.184.1.1 | 76  | 7.51  | 11.95 | 13.38 | 0.41290225 | a.77.1.3  | 0 |
| 1jyoe   | d.184.1.2 | 102 | 7.2   | 16.97 | 19.71 | 0.9278843  | a.39.1.6  | 0 |
| 1j98A   | d.185.1.2 | 157 | 10.74 | 11.04 | 11.31 | 0.63464706 | d.96.1.2  | 1 |
| 1HYWA   | d.186.1.1 | 68  | 2.26  | 5.18  | 6.15  | 0.7046915  | d.10.1.2  | 1 |
| 1gd8a   | d.188.1.1 | 105 | 5.78  | 4.94  | 11.73 | 0.811635   | a.1.1.1   | 0 |
| 1h6ha   | d.189.1.1 | 143 | 9.91  | 11.28 | 16.59 | 0.86653851 | d.110.4.2 | 1 |
| 1kmda   | d.189.1.1 | 117 | 9.6   | 7.56  | 13.49 | 0.78706846 | a.78.1.1  | 0 |
| 1l8jA   | d.19.1.1  | 170 | 11.92 | 9.65  | 11.52 | 0.92587213 | d.19.1.1  | 4 |
| 1G2RA   | d.192.1.1 | 100 | 7.08  | 6.3   | 13.4  | 0.80959307 | d.192.1.1 | 4 |
| 1hufa   | d.195.1.1 | 123 | 8.64  | 9.1   | 12.13 | 0.5629009  | d.228.1.1 | 1 |
| 1k46A   | d.195.1.1 | 124 | 8.97  | 9.81  | 13.92 | 0.79200406 | d.195.1.1 | 4 |
| 1dl5a   | d.197.1.1 | 104 | 7.8   | 9.5   | 13.56 | 0.79016437 | a.7.6.1   | 0 |
| 1l2wi   | d.198.1.1 | 57  | 3.33  | 15.93 | 17.53 | 0.45899803 | a.60.1.2  | 0 |
| d1k3sa_ | d.198.1.1 | 113 | 6.42  | 8.02  | 9.68  | 0.62609048 | d.198.1.1 | 4 |
| 1k8kd   | d.198.2.1 | 120 | 7.67  | 8.27  | 9.5   | 0.89780887 | d.198.2.1 | 5 |
| 1k8kd   | d.198.2.1 | 164 | 10.11 | 13.25 | 19.1  | 0.92005471 | d.198.2.1 | 5 |
| 1kafa   | d.199.1.1 | 108 | 6.01  | 4.96  | 7.19  | 0.97951963 | d.199.1.1 | 5 |
| 1iiza   | d.2.1.2   | 120 | 8.65  | 7.56  | 12.7  | 0.51344335 | d.2.1.2   | 5 |
| 1GD6A   | d.2.1.2   | 119 | 8.84  | 8.86  | 12.66 | 0.45033279 | d.93.1.1  | 1 |
| 1j74A   | d.20.1.1  | 139 | 11.09 | 8.57  | 13.37 | 0.47920414 | a.79.1.1  | 0 |
| 1m1xb   | d.200.1.1 | 85  | 5.4   | 6.42  | 8.05  | 0.77652747 | d.200.1.1 | 5 |
| 1kvna   | d.201.1.1 | 104 | 7.74  | 6.91  | 12.3  | 0.73117775 | a.29.4.1  | 0 |
| 1k0ra   | d.202.1.1 | 104 | 3.77  | 4.74  | 7.39  | 0.9314408  | d.202.1.1 | 5 |
| 1ji8a   | d.203.1.1 | 111 | 6.03  | 5.32  | 5.38  | 0.99514061 | d.203.1.1 | 5 |
| 1IMUA   | d.204.1.1 | 107 | 5.33  | 7.39  | 8.64  | 0.8982115  | d.50.2.1  | 1 |
| 1jg5a   | d.205.1.1 | 83  | 5.93  | 7.09  | 7.9   | 0.54529927 | a.60.5.1  | 0 |
| 1n91a   | d.206.1.1 | 108 | 7.95  | 7.83  | 11.85 | 0.77587092 | d.58.18.1 | 1 |
| 1j5uA   | d.208.1.1 | 136 | 10.36 | 12.55 | 16.78 | 0.74580406 | a.1.1.3   | 0 |

|         |           |     |       |       |       |            |            |   |
|---------|-----------|-----|-------|-------|-------|------------|------------|---|
| 1jw3a   | d.208.1.1 | 140 | 10.59 | 7.97  | 11.52 | 0.92425345 | d.208.1.1  | 5 |
| 1jbia   | d.209.1.1 | 100 | 8.29  | 10    | 12.66 | 0.55389175 | d.131.1.2  | 1 |
| d1bwza1 | d.21.1.1  | 130 | 7.87  | 7.03  | 9.68  | 0.90495978 | c.23.4.1   | 0 |
| 1gqza   | d.21.1.1  | 144 | 9.08  | 9.82  | 12.55 | 0.99298398 | d.21.1.1   | 5 |
| 1myo_   | d.211.1.1 | 118 | 6.52  | 5.85  | 6.86  | 0.96426333 | d.211.1.1  | 5 |
| d1lm5a_ | d.211.2.1 | 196 | 11.77 | 11.06 | 12.23 | 0.98877603 | d.211.2.1  | 4 |
| 1lr0A   | d.212.1.1 | 129 | 9.23  | 13.89 | 18.43 | 0.50980823 | a.133.1.2  | 0 |
| 1iqoa   | d.214.1.1 | 88  | 4.04  | 6.86  | 10.59 | 0.765841   | d.58.18.1  | 1 |
| 1l9va   | d.216.1.1 | 143 | 9.84  | 8.35  | 9.73  | 0.95345163 | a.45.1.1   | 0 |
| 1h5pa   | d.217.1.1 | 95  | 8.1   | 6.78  | 9.15  | 0.81084886 | d.217.1.1  | 5 |
| 1j57a   | d.221.1.1 | 143 | 10.97 | 9.05  | 13.21 | 0.54665316 | c.2.1.5    | 0 |
| 1j8bA   | d.222.1.1 | 112 | 5.28  | 10.81 | 12.17 | 0.84689089 | a.2.7.1    | 0 |
| 1mbya   | d.223.1.1 | 75  | 2.63  | 8.35  | 13.17 | 0.55959122 | d.141.1.1  | 1 |
| d1mzga_ | d.224.1.1 | 144 | 6.93  | 8.31  | 10.59 | 0.86283637 | d.224.1.1  | 4 |
| 1iwga   | d.225.1.1 | 88  | 4.05  | 5.85  | 11.26 | 0.94602425 | d.225.1.1  | 5 |
| 1iwga   | d.225.1.1 | 92  | 6.25  | 10.94 | 15.33 | 0.46289098 | d.1.1.2    | 1 |
| 1mk0a   | d.226.1.1 | 97  | 6.82  | 6.85  | 9.39  | 0.62213789 | a.118.11.1 | 0 |
| 1lrra   | d.228.1.1 | 118 | 7.28  | 7.16  | 13.25 | 0.66360721 | d.58.26.3  | 1 |
| 1hpwa   | d.24.1.1  | 129 | 9.48  | 9.55  | 10.92 | 0.46347454 | d.108.1.1  | 1 |
| 1dzoa   | d.24.1.1  | 120 | 9.32  | 8.17  | 9.42  | 0.74352902 | b.1.1.2    | 0 |
| 1eq3a   | d.26.1.1  | 96  | 6.1   | 5.17  | 7.88  | 0.88127658 | d.26.1.1   | 4 |
| 1FKF    | d.26.1.1  | 107 | 9.25  | 8.52  | 10.42 | 0.92560827 | d.26.1.1   | 4 |
| 3eipa   | d.26.2.1  | 84  | 5.45  | 7.96  | 11.32 | 0.49167514 | a.51.1.1   | 0 |
| 1kfwA   | d.26.3.1  | 61  | 4.55  | 6.3   | 11.16 | 0.31163841 | d.76.1.1   | 1 |
| 1ll7a   | d.26.3.1  | 62  | 5.21  | 5.27  | 8.76  | 0.6255444  | d.26.3.1   | 5 |
| 1XMQP   | d.27.1.1  | 88  | 6.66  | 7.7   | 9.49  | 0.62784168 | d.54.1.1   | 1 |
| 1QKFA   | d.28.1.1  | 92  | 7.53  | 8.44  | 8.59  | 0.67707185 | d.28.1.1   | 4 |
| 1qkfA   | d.28.1.1  | 73  | 4.83  | 5.93  | 8.25  | 0.702663   | c.30.1.1   | 0 |
| 1jj2w   | d.29.1.1  | 82  | 4.05  | 2.94  | 4.22  | 0.98321087 | d.29.1.1   | 5 |
| 1cv8_   | d.3.1.1   | 173 | 12.48 | 11.05 | 14.24 | 0.41031085 | a.25.1.1   | 0 |
| 1b33n   | d.30.1.1  | 67  | 4.71  | 5.44  | 8.14  | 0.5382231  | d.29.1.1   | 1 |
| 1cz4a   | d.31.1.1  | 94  | 6.42  | 8.92  | 10.16 | 0.421908   | d.93.1.1   | 1 |
| 1e32a   | d.31.1.1  | 94  | 7.54  | 8.23  | 11.6  | 0.69947267 | d.31.1.1   | 5 |
| 1bylA   | d.32.1.2  | 122 | 8.93  | 7.73  | 9.22  | 0.89383489 | d.32.1.3   | 3 |



|         |          |     |       |       |       |            |           |   |
|---------|----------|-----|-------|-------|-------|------------|-----------|---|
| 1qtoa   | d.32.1.2 | 122 | 7.67  | 5.86  | 7.8   | 0.97636073 | d.32.1.2  | 5 |
| 1fx3a   | d.33.1.1 | 143 | 9.02  | 10.41 | 17.13 | 0.82966743 | a.25.1.1  | 0 |
| 1bm8_   | d.34.1.1 | 99  | 6.95  | 4.26  | 4.26  | 0.99461631 | d.34.1.1  | 5 |
| 1mb1_   | d.34.1.1 | 98  | 6.72  | 5.79  | 11.17 | 0.79019275 | d.34.1.1  | 4 |
| d1jr1a2 | d.37.1.1 | 43  | 1.2   | 84.01 | 85.37 | 0.39748868 | g.3.7.4   | 0 |
| d1jr1a3 | d.37.1.1 | 55  | 3.47  | 36.23 | 37.15 | 0.73528071 | d.37.1.1  | 4 |
| 1lo7a   | d.38.1.1 | 140 | 10.12 | 10.92 | 14.45 | 0.62249299 | d.81.1.5  | 1 |
| 1cmia   | d.39.1.1 | 85  | 3.81  | 3.05  | 5.91  | 0.91709517 | d.39.1.1  | 5 |
| 1emvB   | d.4.1.1  | 131 | 9.37  | 9.22  | 11.99 | 0.87385885 | d.4.1.1   | 4 |
| 1e7la   | d.4.1.5  | 103 | 7.93  | 10.76 | 16.64 | 0.71953315 | a.7.7.1   | 0 |
| 1COAI   | d.40.1.1 | 64  | 2.33  | 4.16  | 7.37  | 0.52858878 | d.40.1.1  | 4 |
| 1YPCI   | d.40.1.1 | 64  | 2.5   | 4.1   | 6.77  | 0.66706771 | d.40.1.1  | 4 |
| 1hlra   | d.41.1.1 | 117 | 9.64  | 11.1  | 14.69 | 0.49481955 | b.55.1.1  | 0 |
| 1jrob   | d.41.1.1 | 122 | 10.25 | 12.97 | 16.54 | 0.48653541 | c.47.1.8  | 0 |
| 1qapa   | d.41.2.1 | 122 | 8.25  | 10.36 | 12.94 | 0.87737235 | c.23.1.1  | 0 |
| 1qpoa   | d.41.2.1 | 115 | 8.15  | 8.25  | 12.03 | 0.75652641 | d.41.2.1  | 5 |
| 2tpt_   | d.41.3.1 | 105 | 7.25  | 9.37  | 13.61 | 0.55893896 | d.58.49.1 | 1 |
| 1brwa   | d.41.3.1 | 103 | 8.53  | 10.47 | 12.63 | 0.57076619 | c.23.1.1  | 0 |
| 1EOEA   | d.42.1.2 | 100 | 6.16  | 6.27  | 11.06 | 0.76205306 | d.42.1.2  | 4 |
| 1a68_   | d.42.1.2 | 87  | 5.76  | 5.81  | 12.03 | 0.80574864 | a.64.1.1  | 0 |
| 1TFE    | d.43.1.1 | 145 | 8.41  | 9.19  | 12.94 | 0.82046137 | d.43.1.1  | 4 |
| 1idsa   | d.44.1.1 | 114 | 7.46  | 7.53  | 12.75 | 0.66367295 | d.93.1.1  | 1 |
| 1ix9a   | d.44.1.1 | 115 | 7.54  | 6.88  | 8.79  | 0.9688607  | d.44.1.1  | 5 |
| 1CTF    | d.45.1.1 | 74  | 2.34  | 5.79  | 7.81  | 0.84054457 | d.45.1.1  | 4 |
| 1ekta   | d.46.1.1 | 53  | 2.85  | 6.24  | 8.29  | 0.46150554 | d.46.1.1  | 5 |
| 1mmsa   | d.47.1.1 | 63  | 2.85  | 3.69  | 3.94  | 0.91684666 | d.47.1.1  | 5 |
| 1AA3    | d.48.1.1 | 63  | 1.5   | 2.5   | 2.96  | 0.92637795 | d.48.1.1  | 4 |
| d1e8oa_ | d.49.1.1 | 74  | 2.58  | 3.17  | 7.54  | 0.97253773 | d.49.1.1  | 4 |
| d1e8ob_ | d.49.1.1 | 94  | 5.98  | 14.66 | 18.23 | 0.90780028 | d.74.1.1  | 1 |
| 1M58A   | d.5.1.1  | 106 | 8.93  | 8.18  | 12.86 | 0.55874495 | a.4.3.1   | 0 |
| 1onc_   | d.5.1.1  | 104 | 9.32  | 9.92  | 12.3  | 0.43284863 | d.93.1.1  | 1 |
| 1stu_   | d.50.1.1 | 68  | 1.61  | 2.52  | 3.45  | 0.97346258 | d.50.1.1  | 5 |
| d1pda_2 | d.50.2.1 | 88  | 3.09  | 0     | 0     | 0.9897342  | d.50.2.1  | 4 |
| 1dq3a   | d.50.3.1 | 79  | 4.75  | 4.55  | 6.68  | 0.85813519 | d.50.3.1  | 5 |

|         |           |     |       |       |       |            |           |   |
|---------|-----------|-----|-------|-------|-------|------------|-----------|---|
| 1DT4A   | d.51.1.1  | 73  | 4.79  | 3.05  | 4.4   | 0.96129439 | d.51.1.1  | 4 |
| 1vig_   | d.51.1.1  | 71  | 2.83  | 2.63  | 2.67  | 0.98788288 | d.51.1.1  | 5 |
| 3proc   | d.52.1.1  | 80  | 3.87  | 6.43  | 10.82 | 0.68875849 | d.52.1.1  | 5 |
| d3proc2 | d.52.1.1  | 78  | 5.53  | 15.61 | 18.65 | 0.75083023 | a.60.9.1  | 0 |
| 1gpma   | d.52.2.1  | 121 | 8.94  | 6.46  | 8.06  | 0.88675539 | d.52.2.1  | 5 |
| 1k0ra   | d.52.3.1  | 67  | 2.67  | 2.72  | 2.72  | 0.96874623 | d.52.3.1  | 5 |
| d1e3ha4 | d.52.3.1  | 54  | 1.52  | 29.66 | 31.25 | 0.68744595 | d.51.1.1  | 1 |
| 1ib8a   | d.52.4.1  | 90  | 4.51  | 4.49  | 6.46  | 0.99328658 | d.52.4.1  | 5 |
| 1mkya   | d.52.5.1  | 81  | 3.29  | 3.33  | 3.67  | 0.99278073 | d.52.5.1  | 5 |
| 1iw5a   | d.52.6.1  | 113 | 7.41  | 9.65  | 11.71 | 0.97053776 | d.52.6.1  | 5 |
| 1fjgc   | d.53.1.1  | 101 | 5.77  | 5.52  | 7.28  | 0.99138524 | d.53.1.1  | 5 |
| d1jpdx2 | d.54.1.1  | 116 | 6.07  | 8.31  | 14.73 | 0.72682187 | d.54.1.1  | 4 |
| d1fhua2 | d.54.1.1  | 99  | 6.69  | 13.09 | 15.43 | 0.89394749 | d.54.1.1  | 4 |
| 1GIYS   | d.55.1.1  | 113 | 7.56  | 10.71 | 14.53 | 0.98901909 | d.55.1.1  | 4 |
| 1ghha   | d.57.1.1  | 81  | 3.28  | 4.03  | 4.94  | 0.98230424 | d.57.1.1  | 5 |
| 1FCA    | d.58.1.1  | 55  | 3.57  | 3.07  | 3.78  | 0.94256984 | d.58.1.1  | 4 |
| 2fdn_   | d.58.1.1  | 55  | 3.45  | 3.06  | 3.56  | 0.89864835 | d.58.1.1  | 5 |
| 1GXUA   | d.58.10.1 | 91  | 5.51  | 12.99 | 15.21 | 0.99101883 | d.58.3.1  | 2 |
| 2acy_   | d.58.10.1 | 98  | 5.55  | 6.67  | 7.47  | 0.94209765 | d.58.10.1 | 5 |
| 1nOua   | d.58.11.1 | 79  | 2.32  | 3.6   | 4.93  | 0.99242772 | d.58.11.1 | 4 |
| 1fnma   | d.58.11.1 | 79  | 2.14  | 2.36  | 4.22  | 0.99211789 | d.58.11.1 | 5 |
| 1gh8a   | d.58.12.1 | 89  | 5.47  | 5.13  | 6.51  | 0.8694734  | d.80.1.3  | 1 |
| 1B64    | d.58.12.1 | 91  | 6.56  | 7.2   | 9.7   | 0.90488888 | d.58.7.1  | 2 |
| 1jjcb   | d.58.13.1 | 104 | 5.29  | 5.96  | 10.75 | 0.77154363 | d.58.13.1 | 5 |
| 1loua   | d.58.14.1 | 97  | 3.79  | 5.64  | 5.91  | 0.96138568 | c.30.1.2  | 0 |
| 1qjhA   | d.58.14.1 | 93  | 4.7   | 4.81  | 6.74  | 0.97846148 | c.30.1.2  | 0 |
| 1fjgj   | d.58.15.1 | 98  | 5.77  | 7.72  | 15.82 | 0.71254344 | d.58.18.2 | 2 |
| 1fvqa   | d.58.17.1 | 72  | 2.01  | 2.6   | 3.48  | 0.99190097 | d.58.17.1 | 4 |
| 1psda   | d.58.18.1 | 84  | 3.96  | 3.95  | 7.39  | 0.99445855 | d.58.18.1 | 5 |
| 1tdj_   | d.58.18.2 | 88  | 3.56  | 4.05  | 4.75  | 0.98397716 | d.58.18.2 | 5 |
| 1dqaa   | d.58.20.1 | 117 | 5.71  | 6.79  | 9.15  | 0.91381681 | d.58.20.1 | 5 |
| 1qaxa   | d.58.20.1 | 110 | 4.63  | 5.37  | 8.1   | 0.9369216  | d.58.20.1 | 5 |
| 1EKSA   | d.58.21.1 | 161 | 10.61 | 23.04 | 28.9  | 0.58547331 | d.129.3.1 | 1 |
| 1EKRA   | d.58.21.1 | 161 | 10.2  | 22.62 | 26.1  | 0.56602349 | d.41.5.1  | 1 |

|         |           |     |       |       |       |            |           |   |
|---------|-----------|-----|-------|-------|-------|------------|-----------|---|
| 1F2HA   | d.58.22.1 | 169 | 11.49 | 13.18 | 16.66 | 0.82423927 | d.58.22.1 | 4 |
| 1mla_   | d.58.23.1 | 70  | 1.38  | 3.53  | 5.93  | 0.86731053 | d.58.23.1 | 5 |
| 1nm2a   | d.58.23.1 | 62  | 3.37  | 3.5   | 10.21 | 0.73075143 | d.58.23.1 | 5 |
| 1ffgb   | d.58.24.1 | 68  | 4.48  | 4.46  | 4.86  | 0.88399652 | d.58.24.1 | 5 |
| 1FWP    | d.58.24.1 | 139 | 11.41 | 13.14 | 14.39 | 0.38253208 | c.51.2.1  | 0 |
| 1kp6a   | d.58.25.1 | 79  | 7.02  | 7.33  | 9.45  | 0.53255611 | d.64.1.1  | 1 |
| 1h72c   | d.58.26.1 | 133 | 7.04  | 8.41  | 11.46 | 0.68456623 | d.58.26.1 | 5 |
| d1k47a2 | d.58.26.4 | 135 | 7.01  | 9.43  | 10.9  | 0.81144457 | d.58.26.4 | 4 |
| 1regx   | d.58.27.1 | 122 | 9.15  | 10.14 | 12.71 | 0.82119523 | d.58.27.1 | 5 |
| 1PBA    | d.58.3.1  | 81  | 3.41  | 6.76  | 9.57  | 0.77548968 | d.58.18.1 | 2 |
| 1itpa   | d.58.3.2  | 77  | 6.11  | 6.29  | 7.17  | 0.70848117 | d.58.3.2  | 5 |
| 1f9ya   | d.58.30.1 | 158 | 10.72 | 9.88  | 12.06 | 0.559373   | c.37.1.15 | 0 |
| 1hbnb   | d.58.31.2 | 187 | 13.08 | 12.94 | 17.7  | 0.4352341  | a.29.3.2  | 0 |
| 1ftra   | d.58.33.1 | 148 | 10.19 | 12.14 | 13.37 | 0.61392903 | d.108.1.1 | 1 |
| d1qd1a2 | d.58.34.1 | 146 | 10.4  | 13.33 | 13.33 | 0.82667495 | d.58.34.1 | 4 |
| 1k8wa   | d.58.35.2 | 65  | 4.07  | 5.56  | 10.67 | 0.44258728 | a.112.1.1 | 0 |
| d1kska1 | d.58.35.3 | 65  | 4.75  | 6.21  | 10.04 | 0.60369137 | d.74.2.1  | 1 |
| d1aop_1 | d.58.36.1 | 65  | 3.03  | 13.61 | 14.2  | 0.9518932  | d.58.17.1 | 2 |
| 1aop_   | d.58.36.1 | 80  | 4.1   | 3.94  | 11.03 | 0.89850201 | d.58.17.1 | 2 |
| 1eara   | d.58.38.1 | 68  | 3.39  | 2.01  | 2.89  | 0.9879144  | d.58.38.1 | 5 |
| 1gmua   | d.58.38.1 | 68  | 3.78  | 2.72  | 4.53  | 0.98257977 | d.58.38.1 | 4 |
| 1mli_   | d.58.4.1  | 96  | 5.24  | 6.12  | 8.32  | 0.4606941  | c.13.2.1  | 0 |
| d1o8ba2 | d.58.40.1 | 72  | 3.31  | 5.23  | 6.78  | 0.95347142 | d.58.17.1 | 2 |
| 1ivza   | d.58.41.1 | 132 | 10.33 | 11.71 | 14.35 | 0.72005292 | d.58.41.1 | 5 |
| 1mxma   | d.58.43.1 | 101 | 3.9   | 8.45  | 13.99 | 0.98942161 | d.58.18.3 | 2 |
| 1iwga   | d.58.44.1 | 97  | 3.22  | 3.45  | 4.28  | 0.99711701 | d.58.44.1 | 5 |
| d1gtda_ | d.58.45.1 | 82  | 2.44  | 8.1   | 10.94 | 0.72769343 | d.58.4.2  | 2 |
| 2pii_   | d.58.5.1  | 112 | 9.06  | 9.18  | 14.92 | 0.8692665  | d.58.5.1  | 5 |
| 1NCL    | d.58.6.1  | 150 | 10.97 | 9.97  | 11.85 | 0.53766887 | c.78.1.1  | 0 |
| 1LEO    | d.58.6.1  | 150 | 10.73 | 10.81 | 14.71 | 0.60926727 | d.58.6.1  | 4 |
| 1hd0A   | d.58.7.1  | 75  | 3.87  | 4.15  | 7.02  | 0.95356436 | d.58.7.1  | 4 |
| 2msta   | d.58.7.1  | 75  | 3.24  | 3.82  | 4.11  | 0.98501626 | d.58.7.1  | 5 |
| 1A7GE   | d.58.8.1  | 82  | 4.18  | 4.98  | 8.89  | 0.86646974 | d.58.8.1  | 4 |
| 1BY9    | d.58.8.1  | 81  | 4.96  | 10.89 | 12.49 | 0.52900741 | d.58.4.2  | 2 |

|          |          |     |       |       |       |            |           |   |
|----------|----------|-----|-------|-------|-------|------------|-----------|---|
| 1geha    | d.58.9.1 | 125 | 9.41  | 9.52  | 11.14 | 0.54931585 | d.58.9.1  | 5 |
| d5rubba2 | d.58.9.1 | 136 | 10.37 | 14.91 | 17.7  | 0.57023356 | c.2.1.5   | 0 |
| 1bxya    | d.59.1.1 | 60  | 3.74  | 3.28  | 4.84  | 0.82451429 | d.59.1.1  | 5 |
| 1e1wA    | d.6.1.1  | 104 | 8.78  | 8.15  | 12.8  | 0.8062154  | d.110.4.1 | 1 |
| 1AG2     | d.6.1.1  | 103 | 8.68  | 9.87  | 12.97 | 0.55573324 | a.79.1.1  | 0 |
| 1jyha    | d.60.1.3 | 155 | 10.81 | 12.26 | 14.6  | 0.61807947 | c.49.1.1  | 0 |
| 1F32A    | d.62.1.1 | 149 | 10.48 | 12.52 | 13.89 | 0.72737701 | a.118.9.2 | 0 |
| 2if1_    | d.64.1.1 | 126 | 8.43  | 12.99 | 16.88 | 0.6588929  | d.64.1.1  | 5 |
| 1D1RA    | d.64.1.1 | 116 | 7.08  | 9.32  | 11.03 | 0.88658251 | d.64.1.1  | 4 |
| 1C05A    | d.66.1.2 | 159 | 11.23 | 10.78 | 14.23 | 0.54006745 | d.110.2.1 | 1 |
| 1JH3A    | d.66.1.4 | 107 | 6.87  | 7.94  | 11.1  | 0.60093703 | a.24.15.1 | 0 |
| 1f7ua    | d.67.2.1 | 134 | 9.61  | 9.46  | 14.12 | 0.56170589 | d.206.1.1 | 1 |
| 1iq0a    | d.67.2.1 | 96  | 6.3   | 4.64  | 6.92  | 0.79134854 | d.67.2.1  | 5 |
| 1GE9A    | d.67.3.1 | 184 | 11.8  | 8.67  | 16.46 | 0.99808996 | d.67.3.1  | 4 |
| 1dd5A    | d.67.3.1 | 184 | 11.08 | 9.86  | 14.64 | 0.92275323 | a.24.1.1  | 0 |
| 2IFEA    | d.68.1.1 | 100 | 4.48  | 6.49  | 7.96  | 0.99530789 | d.68.1.1  | 4 |
| 1tig_    | d.68.1.1 | 88  | 2     | 2.86  | 3.21  | 0.9979156  | d.68.1.1  | 5 |
| 1dcja    | d.68.3.1 | 81  | 3.29  | 4.21  | 5.26  | 0.97425041 | d.68.3.1  | 5 |
| 1JE3A    | d.68.3.2 | 97  | 4.96  | 13.26 | 16.69 | 0.87934184 | d.68.3.1  | 3 |
| 1ln4A    | d.68.4.1 | 98  | 4.71  | 4.82  | 5.85  | 0.99400686 | d.68.4.1  | 4 |
| 1hc7a    | d.68.5.1 | 74  | 5.48  | 5.58  | 6.98  | 0.82669268 | d.68.5.1  | 4 |
| 1h0xa    | d.68.6.1 | 89  | 3.84  | 3.18  | 3.86  | 0.99614034 | d.68.6.1  | 5 |
| 1MSZA    | d.68.7.1 | 86  | 6.57  | 7.81  | 8.39  | 0.80778742 | d.68.3.1  | 2 |
| 1e01a    | d.7.1.1  | 48  | 1.98  | 2.24  | 3.1   | 0.87055069 | d.7.1.1   | 5 |
| 1kpta    | d.70.1.1 | 105 | 9.89  | 9.75  | 11.37 | 0.4352188  | a.151.1.1 | 0 |
| 1ev0a    | d.71.1.1 | 58  | 3.24  | 4.62  | 6.44  | 0.76321962 | d.71.1.1  | 5 |
| d1dwka2  | d.72.1.1 | 70  | 3.28  | 6.91  | 11.62 | 0.46377713 | d.72.1.1  | 4 |
| 1bwvs    | d.73.1.1 | 138 | 8.51  | 9.32  | 11.97 | 0.7248458  | d.109.1.2 | 1 |
| 1gk8i    | d.73.1.1 | 125 | 7.68  | 10.05 | 11.35 | 0.62860666 | d.73.1.1  | 5 |
| 1dcpa    | d.74.1.1 | 99  | 4.38  | 4.41  | 8.4   | 0.99522961 | d.74.1.1  | 5 |
| 1xxaa    | d.74.2.1 | 71  | 3.1   | 3.84  | 4.45  | 0.98316295 | d.74.2.1  | 4 |
| 1b4ba    | d.74.2.1 | 71  | 3.03  | 2.53  | 7.99  | 0.98698311 | d.74.2.1  | 5 |
| 1i50k    | d.74.3.2 | 114 | 4.75  | 8.78  | 12.8  | 0.89878877 | d.74.3.2  | 5 |
| 1a79a    | d.75.1.1 | 74  | 4.66  | 4.06  | 5.84  | 0.70772231 | d.75.1.1  | 5 |

|         |          |     |       |       |       |            |           |   |
|---------|----------|-----|-------|-------|-------|------------|-----------|---|
| d1e3ma4 | d.75.2.1 | 115 | 7.08  | 7.24  | 7.58  | 0.80513665 | d.75.2.1  | 4 |
| d1ewqa4 | d.75.2.1 | 120 | 7.73  | 7.38  | 10.68 | 0.70655949 | c.37.1.22 | 0 |
| 1gyfa   | d.76.1.1 | 62  | 3.47  | 5.25  | 7.07  | 0.4418585  | d.37.1.1  | 1 |
| 1EIKA   | d.78.1.1 | 77  | 5.17  | 5.6   | 10.96 | 0.54092667 | a.60.2.1  | 0 |
| 1hmjA   | d.78.1.1 | 68  | 2.39  | 4.72  | 6.34  | 0.73451956 | d.78.1.1  | 4 |
| 1fnkA   | d.79.1.2 | 127 | 9     | 9.98  | 13.8  | 0.5932387  | d.79.1.2  | 4 |
| 1fnjA   | d.79.1.2 | 127 | 8.93  | 11.7  | 12.48 | 0.66708289 | d.79.1.2  | 4 |
| 1fsz_   | d.79.2.1 | 125 | 7.5   | 7.45  | 12.18 | 0.95863623 | d.79.2.1  | 5 |
| 1ck9a   | d.79.3.1 | 104 | 6.4   | 6.51  | 9.54  | 0.92564232 | d.79.3.1  | 4 |
| 1U3LA   | d.79.5.1 | 159 | 10.88 | 11.88 | 14.47 | 0.80934766 | d.79.5.1  | 4 |
| 4ubpa   | d.8.1.1  | 100 | 4.25  | 5.14  | 8.14  | 0.98850272 | d.8.1.1   | 5 |
| 1fim_   | d.80.1.3 | 114 | 4.85  | 8.39  | 14.14 | 0.99796056 | d.80.1.3  | 4 |
| 1dih_   | d.81.1.3 | 110 | 7.98  | 7.13  | 13.4  | 0.61781499 | a.74.1.2  | 0 |
| 1j5pa   | d.81.1.3 | 103 | 6.27  | 6.74  | 11.24 | 0.91399665 | d.81.1.3  | 5 |
| 1oaca   | d.82.1.1 | 86  | 2.97  | 3.51  | 6.19  | 0.99442835 | d.82.1.1  | 5 |
| 1ly7A   | d.82.2.1 | 121 | 8.34  | 6.86  | 7.76  | 0.94350974 | d.82.2.1  | 4 |
| 1ew4a   | d.82.2.1 | 106 | 4.84  | 5.25  | 8.49  | 0.92775746 | d.82.2.1  | 5 |
| 3ssi_   | d.84.1.1 | 108 | 8.58  | 8.34  | 12.84 | 0.4545937  | d.17.2.1  | 1 |
| 1MSC    | d.85.1.1 | 129 | 9.22  | 9.31  | 14.22 | 0.83196528 | d.85.1.1  | 4 |
| 1d7ya   | d.87.1.1 | 97  | 6.42  | 6.44  | 8.47  | 0.80172011 | d.87.1.1  | 5 |
| 1fcda   | d.87.1.1 | 74  | 4.18  | 7.06  | 8.86  | 0.63880572 | d.52.7.1  | 1 |
| 1fo4a   | d.87.2.1 | 117 | 7.65  | 7.67  | 10.81 | 0.91366976 | a.41.1.1  | 0 |
| 1n62c   | d.87.2.1 | 109 | 5.44  | 6.3   | 8.47  | 0.78871931 | a.24.13.1 | 0 |
| 1mnma   | d.88.1.1 | 85  | 5.25  | 8.39  | 12.92 | 0.64566664 | g.10.1.2  | 0 |
| 1egwa   | d.88.1.1 | 71  | 3.48  | 8.79  | 10.25 | 0.64879622 | d.88.1.1  | 5 |
| 1tbd_   | d.89.1.1 | 134 | 9.21  | 9.56  | 12.08 | 0.75909466 | f.36.1.1  | 0 |
| 1l2ma   | d.89.1.4 | 118 | 8.01  | 10.68 | 13.58 | 0.68807768 | d.89.1.4  | 5 |
| 2HCC    | d.9.1.1  | 66  | 3.69  | 6.36  | 9.74  | 0.5883386  | d.58.17.1 | 1 |
| 1SDF    | d.9.1.1  | 67  | 3.45  | 6.78  | 11.73 | 0.74393034 | d.40.1.1  | 1 |
| 1B4O    | d.9.2.1  | 62  | 2.97  | 3.69  | 4.59  | 0.95341114 | d.9.2.1   | 4 |
| 1SSO    | d.9.2.1  | 62  | 2.77  | 3.43  | 7.53  | 0.92377291 | d.9.2.1   | 4 |
| 1nox_   | d.90.1.1 | 200 | 13.01 | 11.52 | 16    | 0.77652897 | d.90.1.1  | 5 |
| 1dt9a   | d.91.1.1 | 138 | 7.66  | 7.99  | 12.07 | 0.99082363 | d.91.1.1  | 5 |
| 1c7ka   | d.92.1.1 | 132 | 10.48 | 9.83  | 14    | 0.51459959 | c.17.1.1  | 0 |

|         |          |     |       |       |       |            |          |   |
|---------|----------|-----|-------|-------|-------|------------|----------|---|
| 1qba_   | d.92.2.1 | 137 | 10.36 | 12.2  | 14.45 | 0.69424414 | d.92.2.1 | 5 |
| d1k9da2 | d.92.2.2 | 138 | 9.46  | 9.73  | 11.86 | 0.73213651 | d.92.2.2 | 4 |
| 1opd_   | d.94.1.1 | 85  | 3.22  | 3.51  | 10.17 | 0.9902566  | d.94.1.1 | 5 |
| 1POH    | d.94.1.1 | 85  | 3.16  | 4.26  | 10.07 | 0.68084732 | d.68.3.1 | 1 |
| d1j5ya2 | d.94.2.1 | 107 | 3.97  | 5.78  | 9.67  | 0.7612036  | c.2.1.3  | 0 |
| 1IBA    | d.95.1.1 | 101 | 5.84  | 8.79  | 12.56 | 0.51324573 | d.68.3.1 | 1 |
| 1AF5    | d.95.2.1 | 126 | 8.07  | 10.66 | 13.5  | 0.7443009  | d.95.2.1 | 4 |
| 1dhn_   | d.96.1.3 | 121 | 7.76  | 8.8   | 10    | 0.87530692 | d.96.1.3 | 5 |
| 1puc_   | d.97.1.1 | 101 | 8.61  | 9     | 11.63 | 0.53273415 | a.4.5.10 | 0 |
| 1div_   | d.99.1.1 | 94  | 5.45  | 4.43  | 10.09 | 0.89293858 | d.99.1.1 | 5 |
| 1i3ja   | e.30.1.1 | 96  | 7.74  | 15.91 | 19.06 | 0.36148071 | d.10.1.3 | 0 |
| d1knza_ | e.34.1.1 | 157 | 11.01 | 11.31 | 14.58 | 0.70796289 | a.90.1.1 | 0 |
| d1kyqa2 | e.37.1.1 | 123 | 6.87  | 8.54  | 11.19 | 0.98338399 | e.37.1.1 | 4 |
